# Supplementary material for: Multisite test–retest reliability and compatibility of brain metrics derived from FreeSurfer versions 7.1, 6.0, and 5.3
Source: PubMed Central journal article supplement (PMC9921222; doi:10.1002/hbm.26147), 2022-11-27
Supplement: HBM-44-1515-s001.pdf [file HBM-44-1515-s001.pdf]

## Supplementary Materials

|                                                    |               |
|----------------------------------------------------|---------------|
| Figures S1-S8: site specific ICC radar plots ..... | pages 2-9     |
| Figures S9-S10: z-statistic difference maps .....  | page 10       |
| Figure S11-S14: ComBat harmonization .....         | pages 11-14   |
| Table 1. runtimes .....                            | pages 15      |
| Table 2: Euler numbers .....                       | pages 16      |
| Table 3: HCP specific ICCs .....                   | pages 17-49   |
| Table 4: KKI specific ICCs .....                   | pages 50-82   |
| Table 5: OASIS specific ICCs .....                 | pages 83-115  |
| Table 6: HNU specific ICCs .....                   | pages 116-148 |

*Haddad, E., Pizzagalli, F., Zhu, A. H., Bhatt, R. R., Islam, T., Gari, I. B., ... & Jahanshad, N. (2022). Multisite Test-Retest Reliability and Compatibility of Brain Metrics derived from FreeSurfer Versions 7.1, 6.0, and 5.3. Human Brain Mapping*

## Between Version Compatibility (HCP)

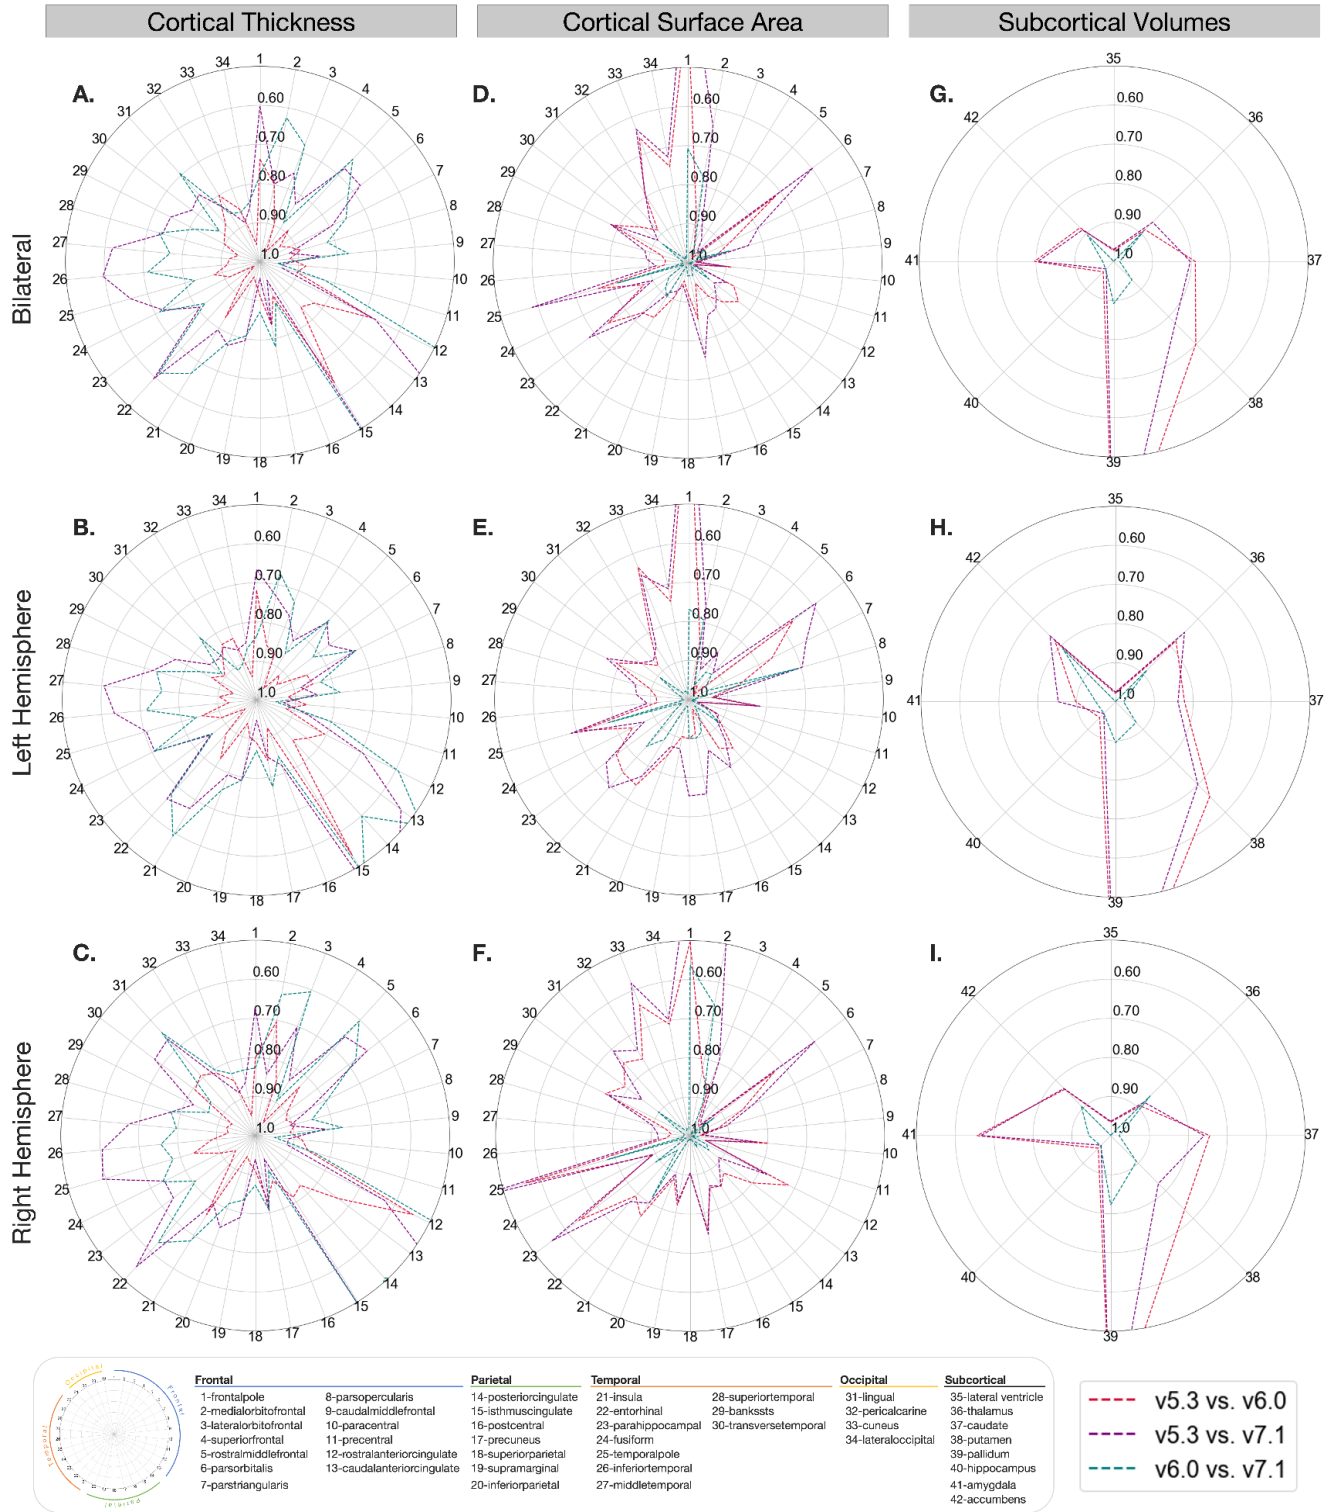

**Figure S1. Regional inter-version agreement (compatibility) for the HCP dataset.** Bilateral, left, and right ICC2 values comparing cortical thickness (A, B, C), cortical surface area (D, E, F), and subcortical volumes (G, H, I) between versions. Outer concentric circles represent lower ICC2 values, truncated at 0.50, while the center represents ICC2=1. Regions with the lowest compatibility differ for cortical thickness and surface area.

## Within Version Reliability (HCP)

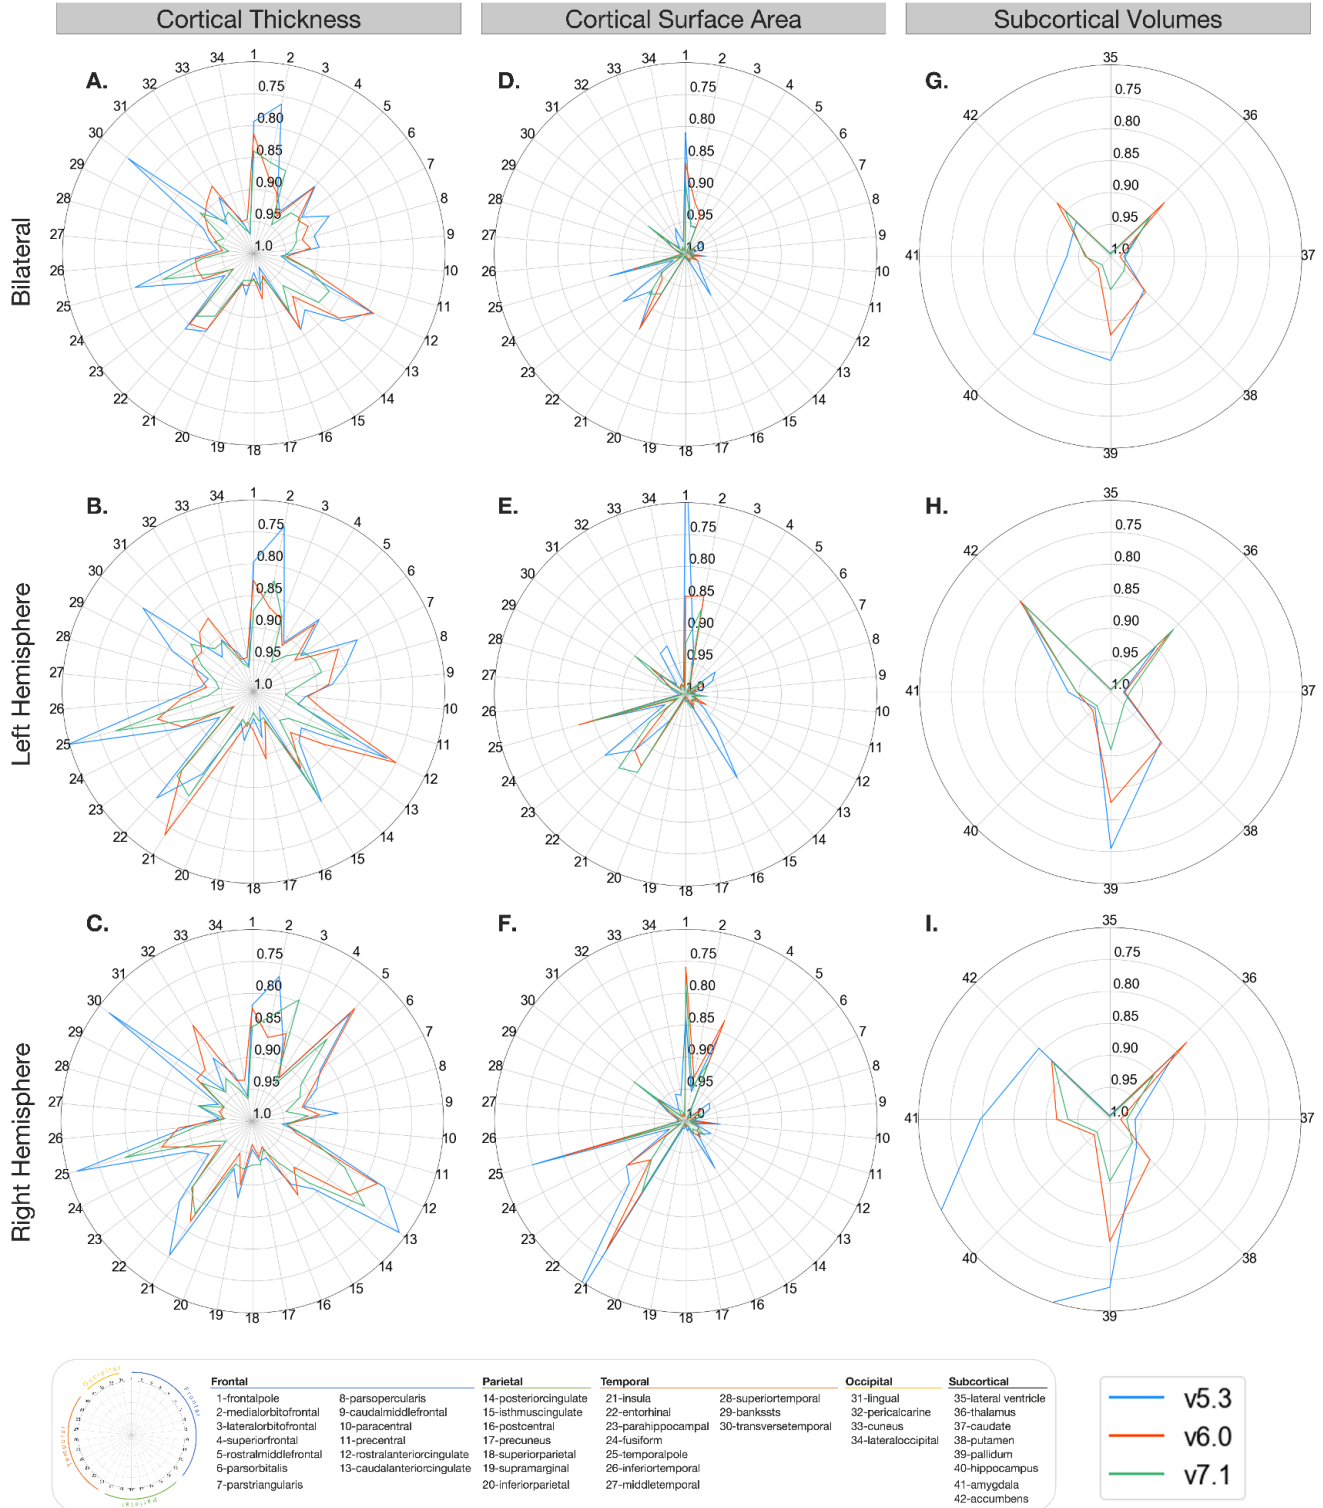

**Figure S2. Regional intra-version agreement (reliability) for the HCP dataset.** Bilateral, left, and right ICC3 values comparing cortical thickness (A, B, C), cortical surface area (D, E, F), and subcortical volumes (G, H, I) between versions. Outer concentric circles represent smaller ICC3 values, truncated at 0.70. Regions with the lowest reliability differ for cortical thickness and surface area.

## Between Version Compatibility (KKI)

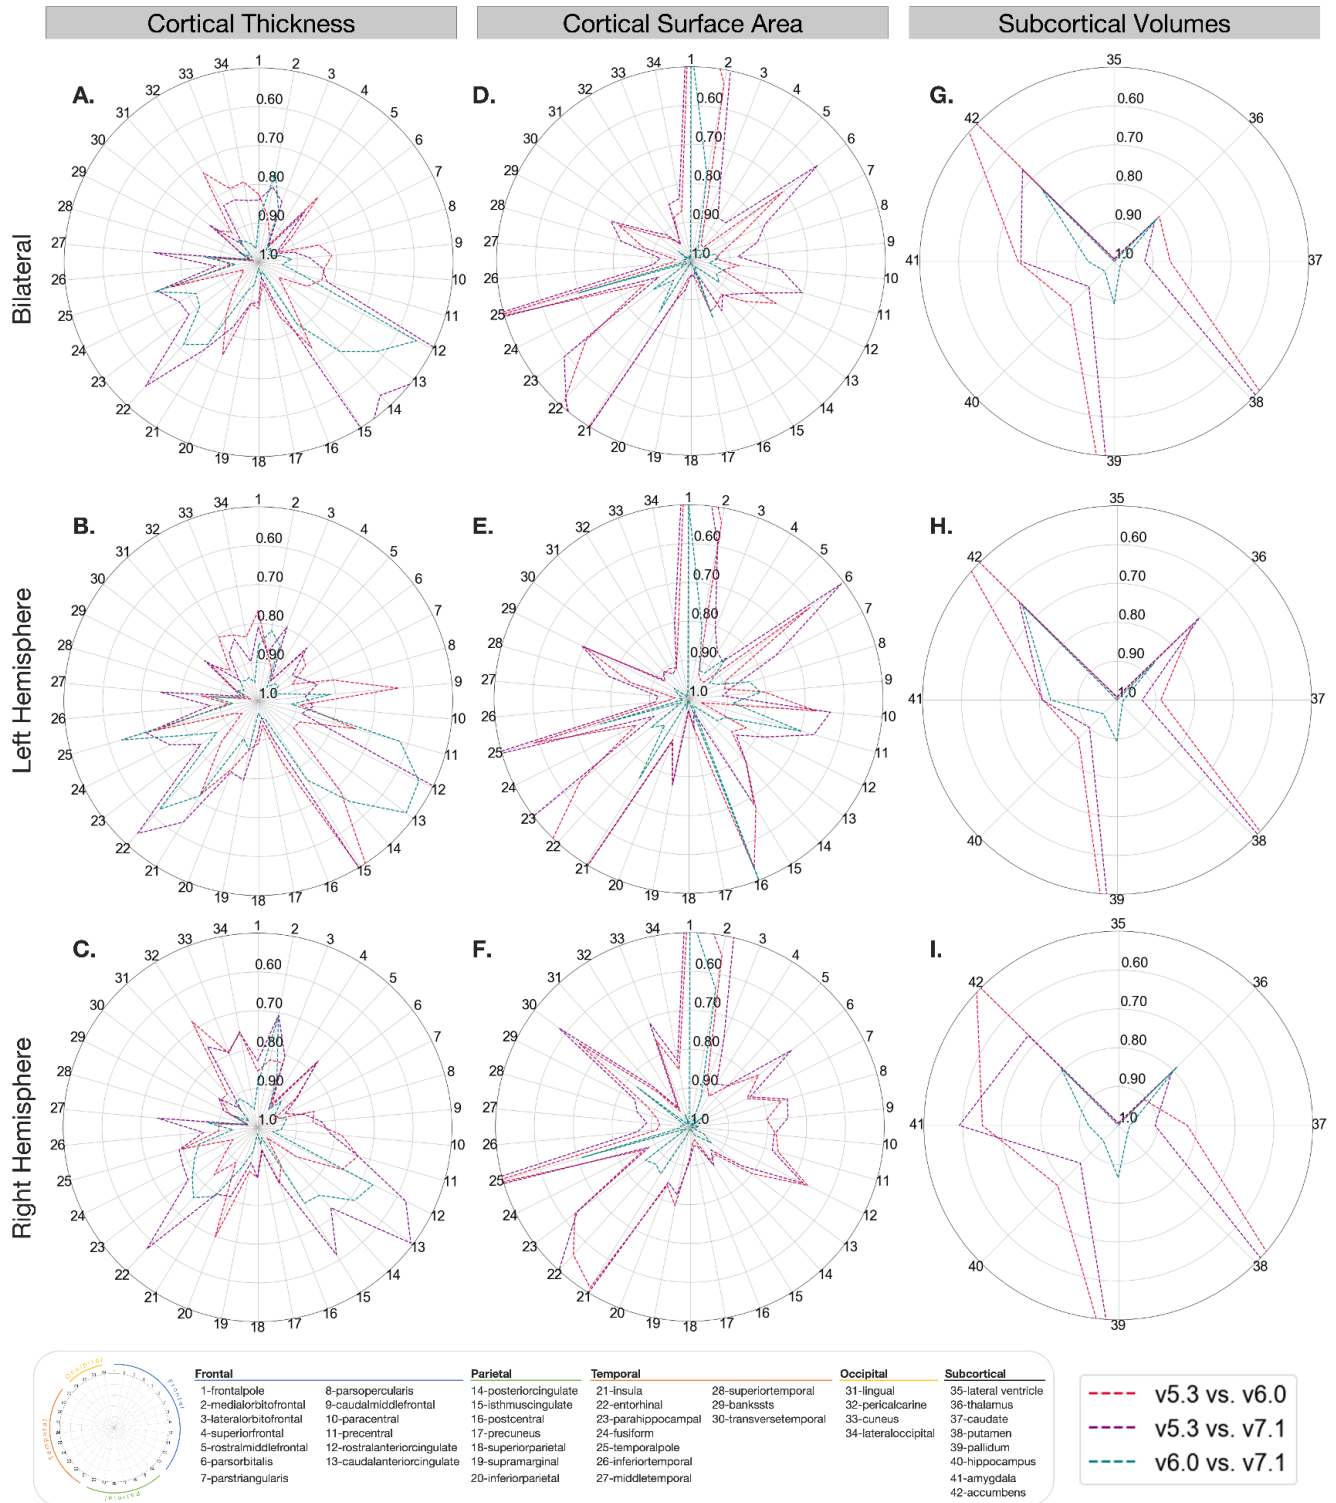

**Figure S3. Regional inter-version agreement (compatibility) for the KKI dataset.** Bilateral, left, and right ICC2 values comparing cortical thickness (A, B, C), cortical surface area (D, E, F), and subcortical volumes (G, H, I) between versions. Outer concentric circles represent lower ICC2 values, truncated at 0.50, while the center represents ICC2=1. Regions with the lowest compatibility differ for cortical thickness and surface area.

## Within Version Reliability (KKI)

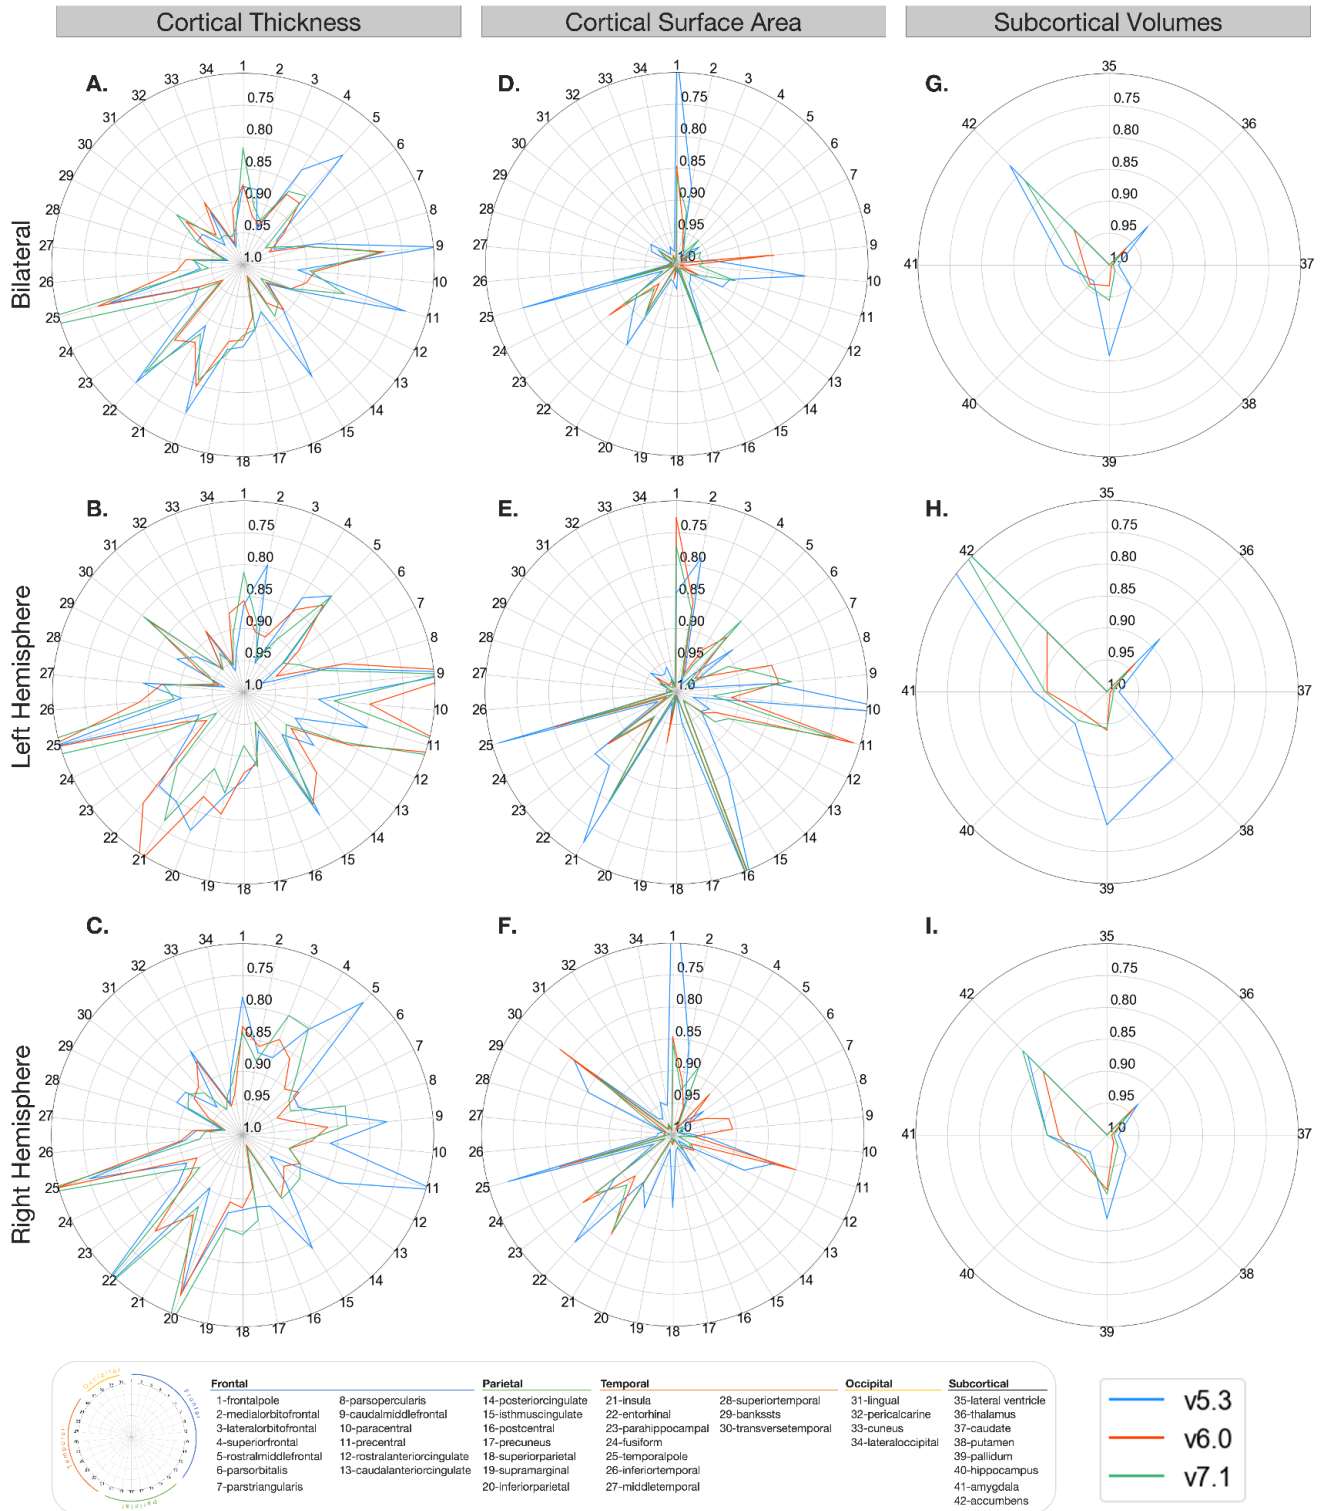

**Figure S4. Regional intra-version agreement (reliability) for the KKI dataset.** Bilateral, left, and right ICC3 values comparing cortical thickness (A, B, C), cortical surface area (D, E, F), and subcortical volumes (G, H, I) between versions. Outer concentric circles represent smaller ICC3 values, truncated at 0.70. Regions with the lowest reliability differ for cortical thickness and surface area.

## Between Version Compatibility (OASIS)

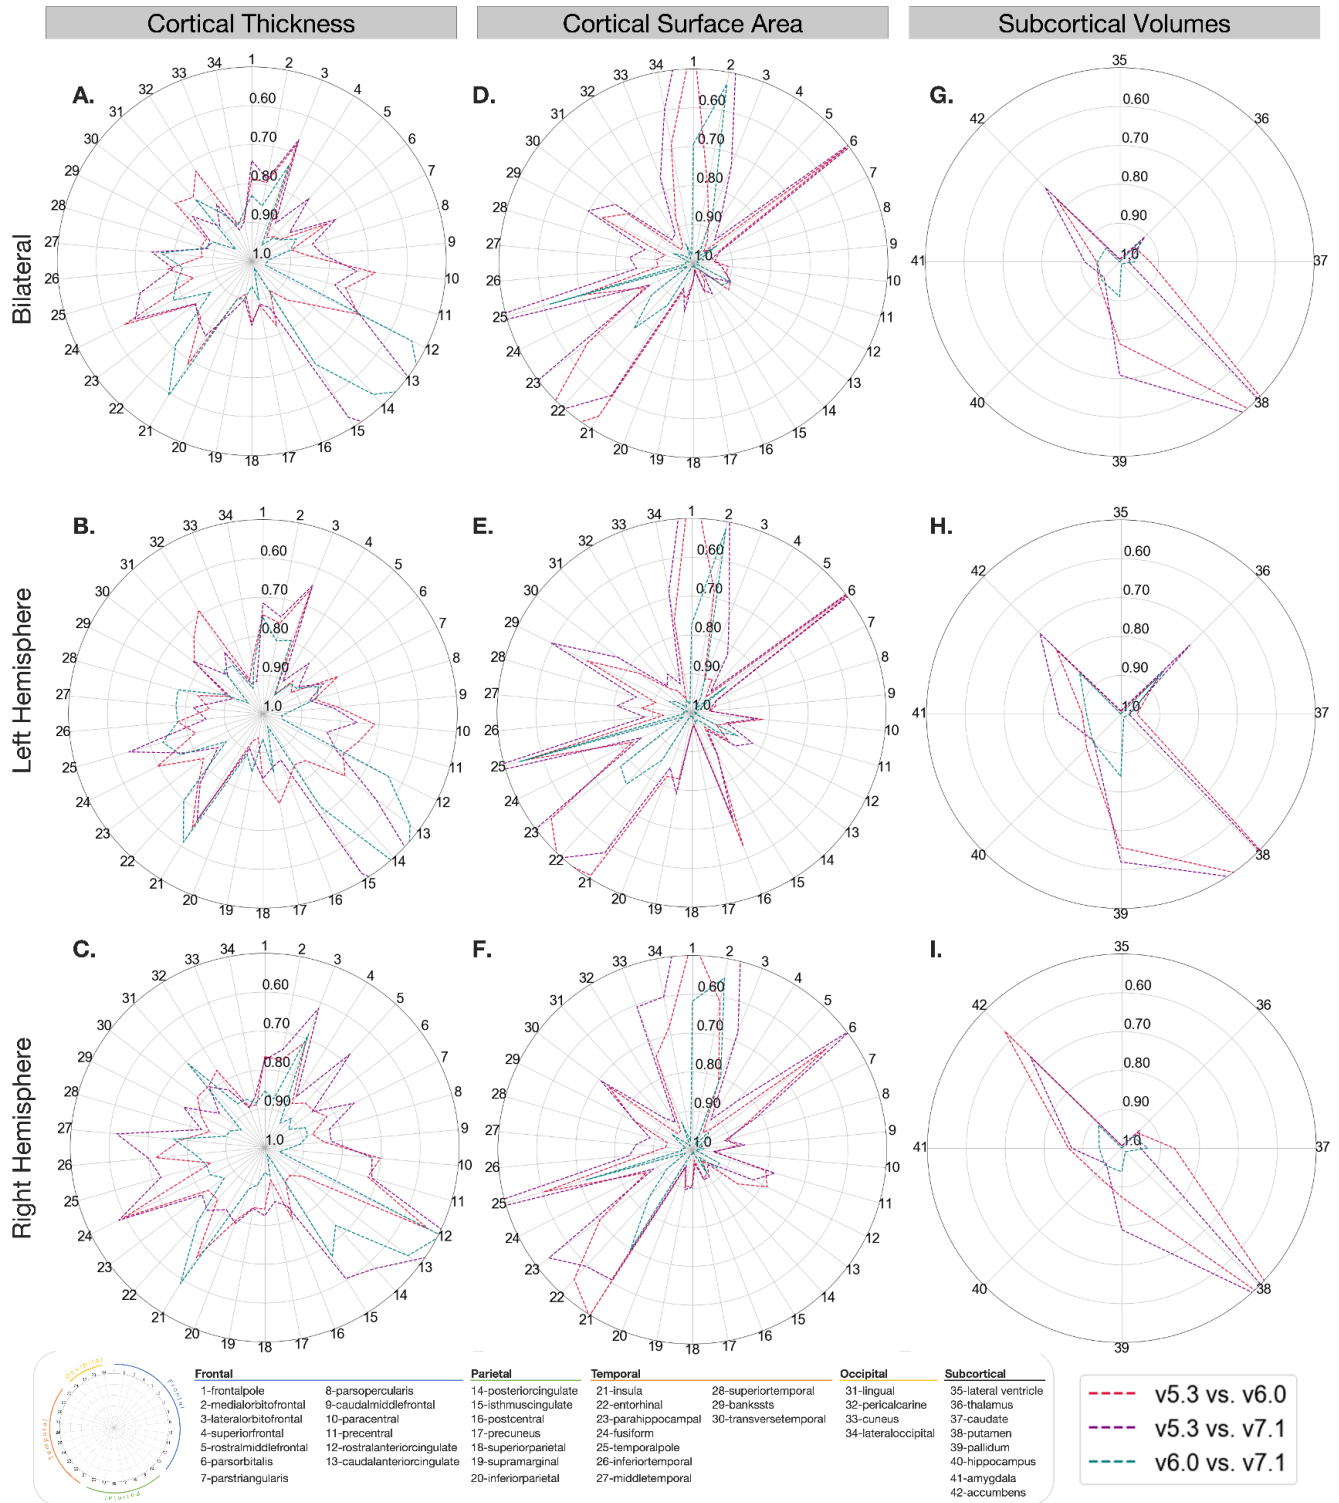

**Figure S5. Regional inter-version agreement (compatibility) for the OASIS dataset.** Bilateral, left, and right ICC2 values comparing cortical thickness (A, B, C), cortical surface area (D, E, F), and subcortical volumes (G, H, I) between versions. Outer concentric circles represent lower ICC2 values, truncated at 0.50, while the center represents ICC2=1. Regions with the lowest compatibility differ for cortical thickness and surface area.

## Within Version Reliability (OASIS)

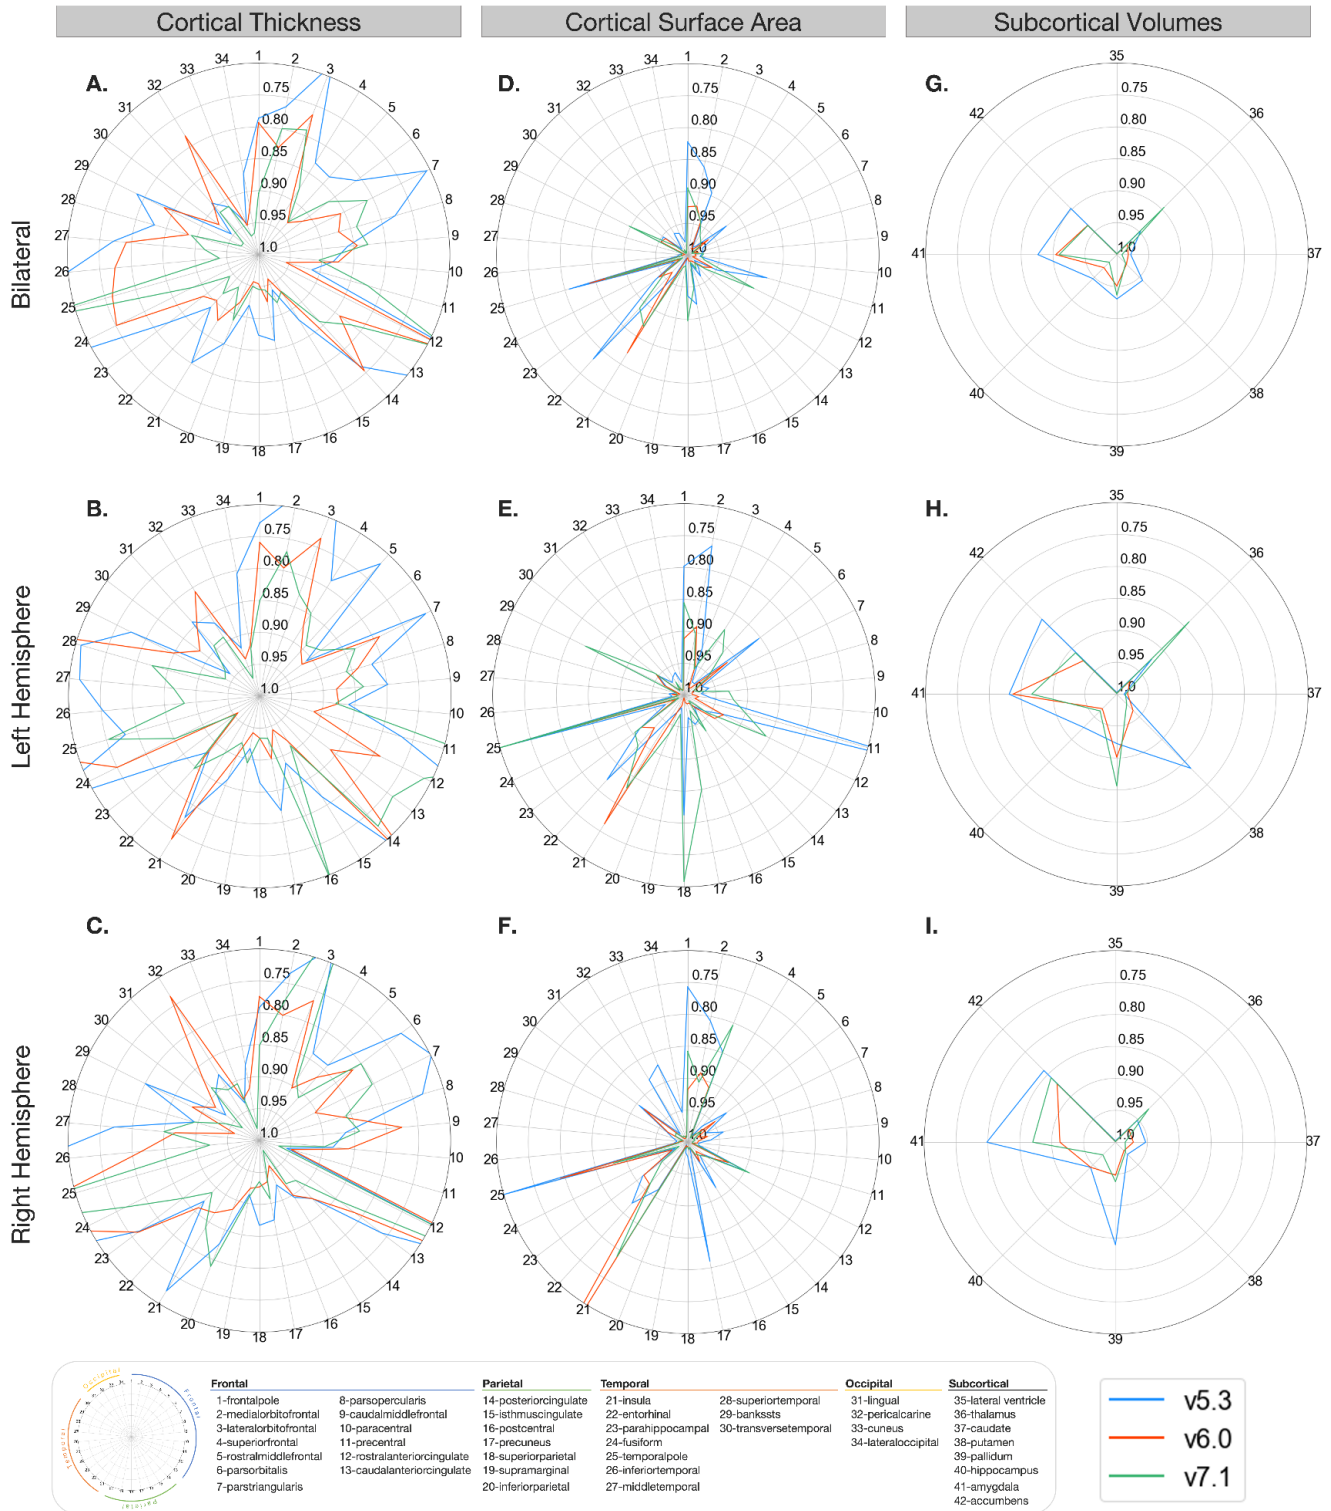

**Figure S6. Regional intra-version agreement (reliability) for the OASIS dataset.** Bilateral, left, and right ICC3 values comparing cortical thickness (A, B, C), cortical surface area (D, E, F), and subcortical volumes (G, H, I) between versions. Outer concentric circles represent smaller ICC3 values, truncated at 0.70. Regions with the lowest reliability differ for cortical thickness and surface area.

## Between Version Compatibility (HNU)

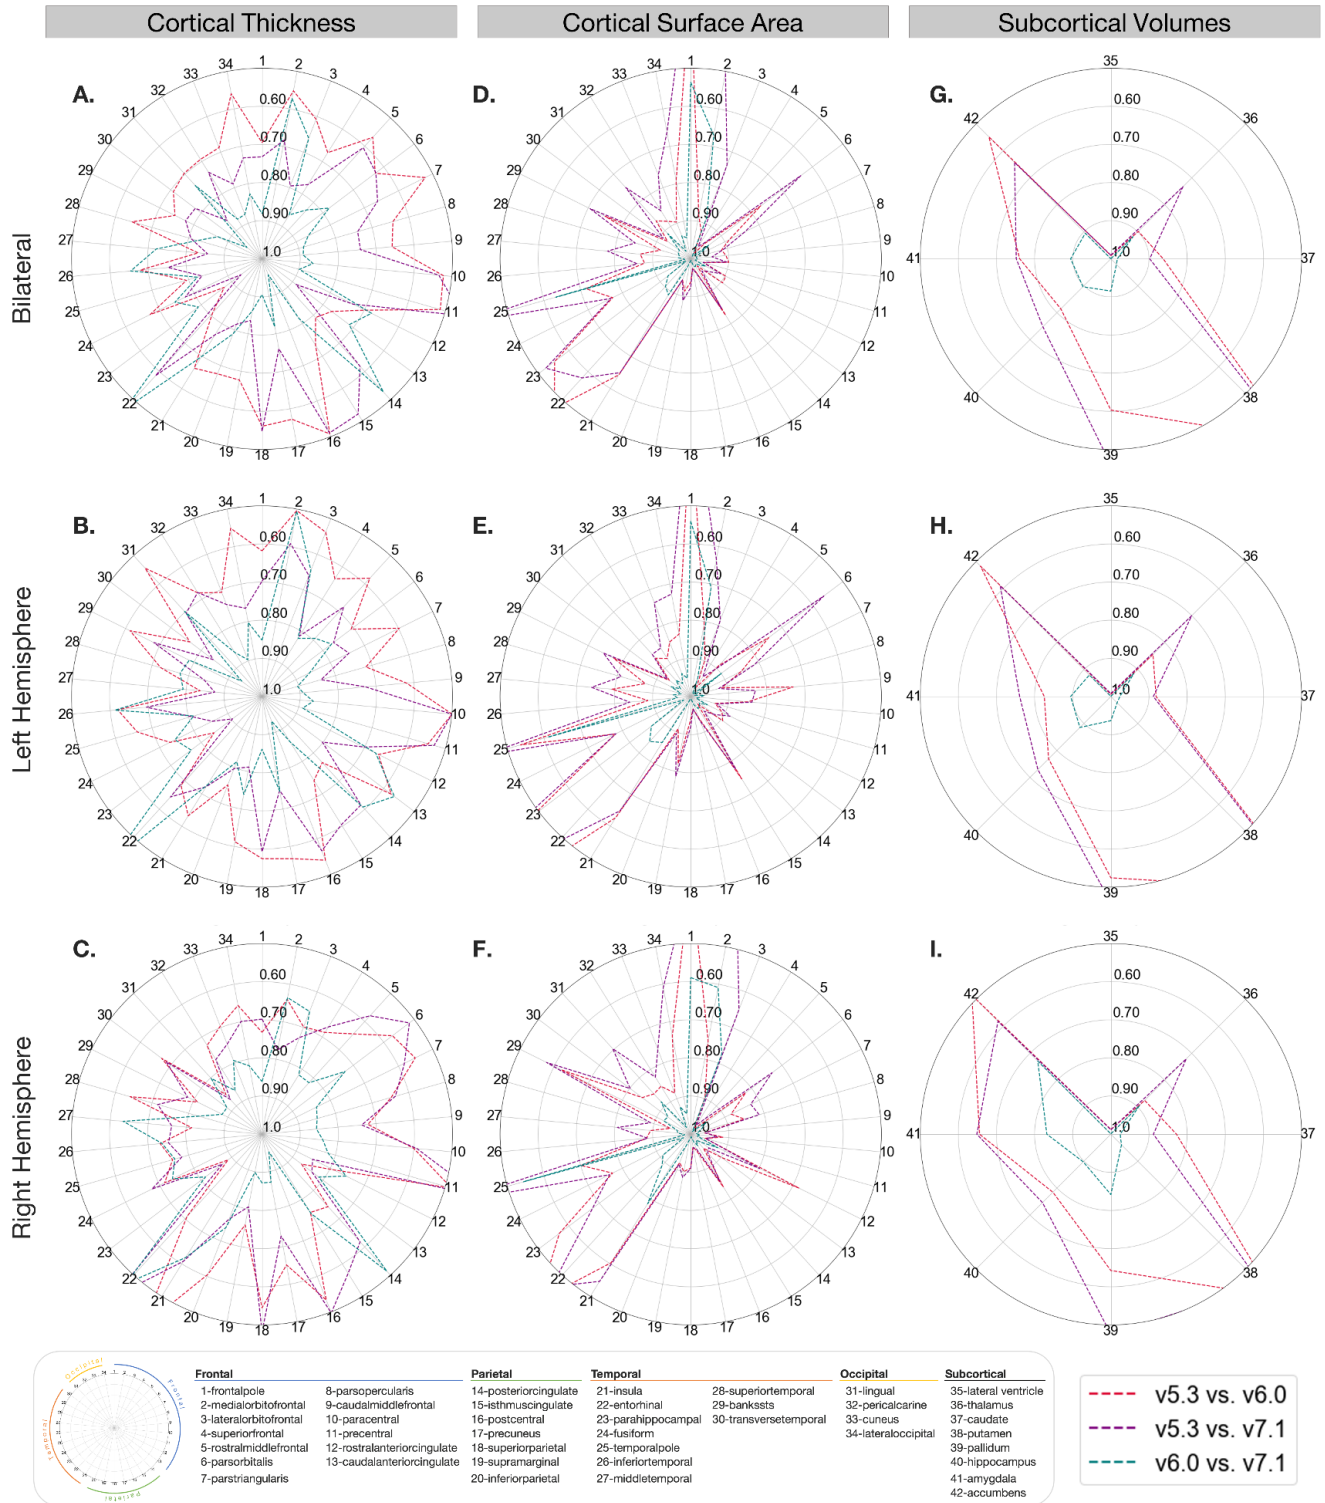

**Figure S7. Regional inter-version agreement (compatibility) for the HNU dataset.** Bilateral, left, and right ICC2 values comparing cortical thickness (A, B, C), cortical surface area (D, E, F), and subcortical volumes (G, H, I) between versions. Outer concentric circles represent lower ICC2 values, truncated at 0.50, while the center represents ICC2=1. Regions with the lowest compatibility differ for cortical thickness and surface area.



## Within Version Reliability (HNU)

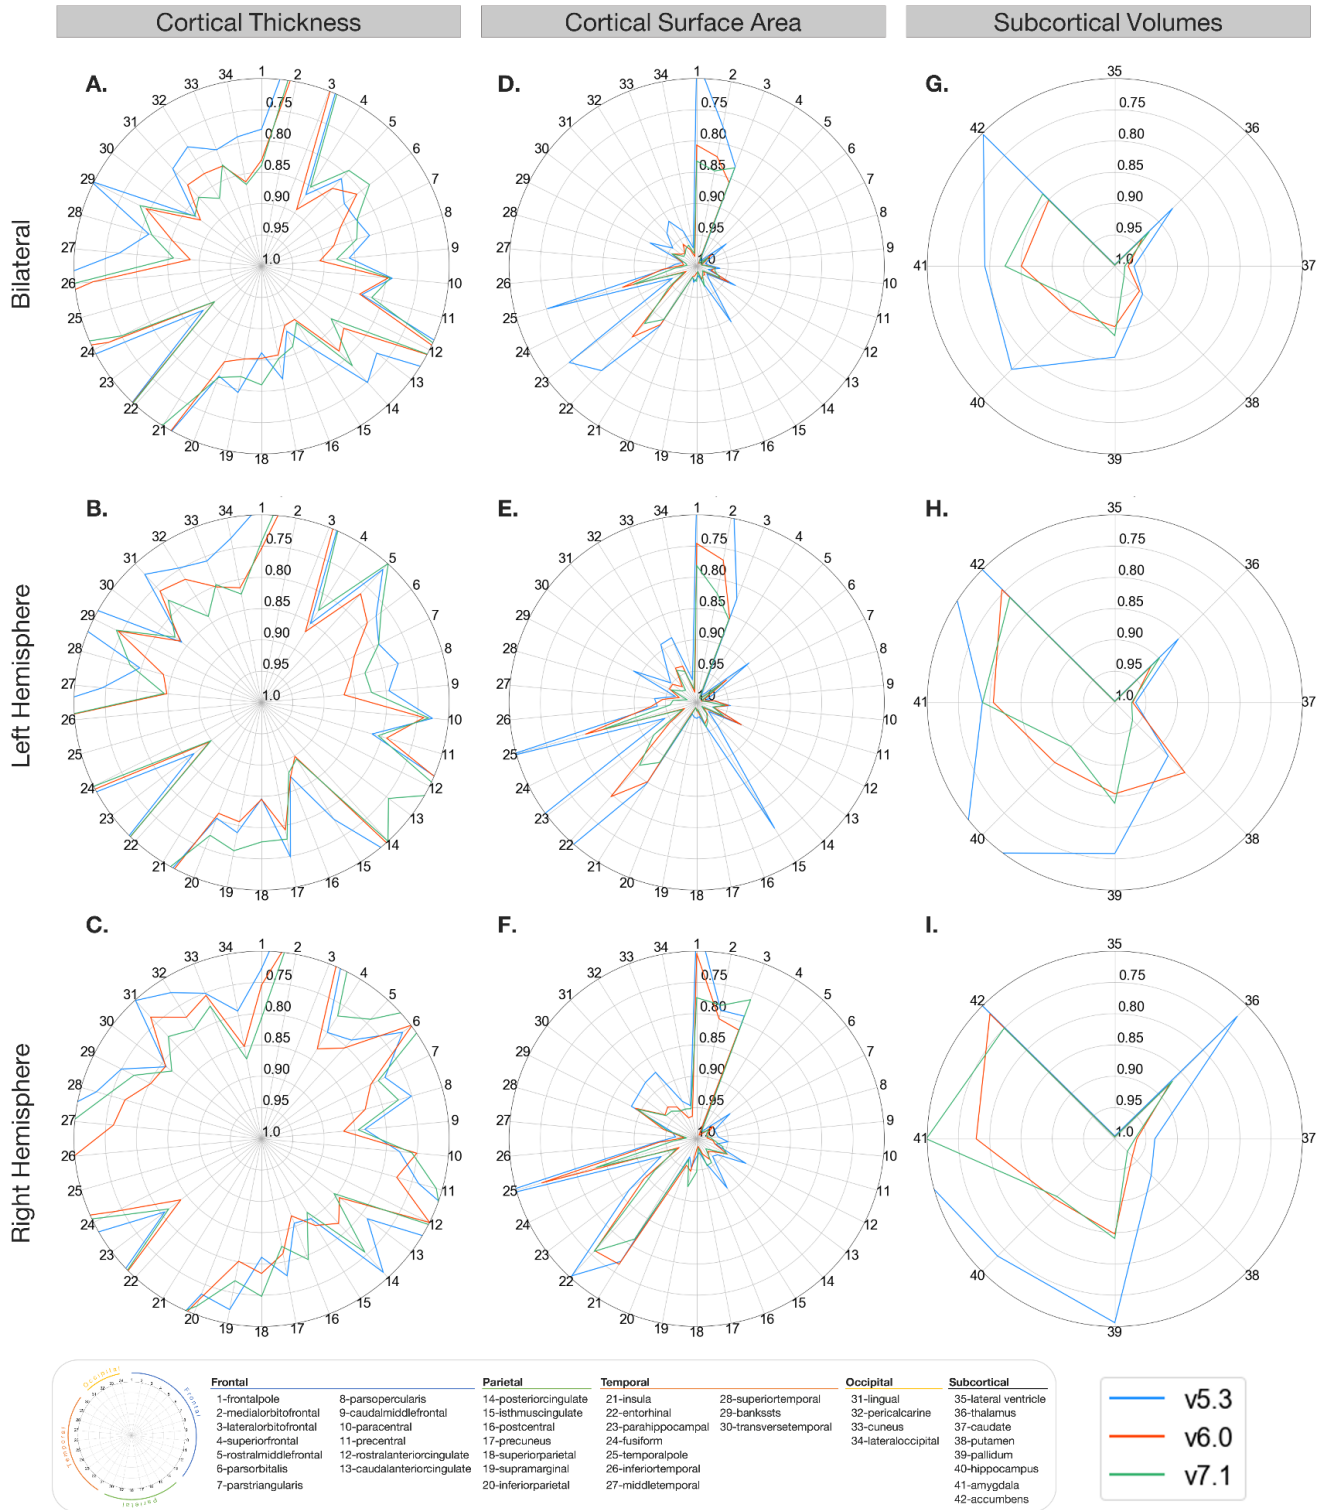

**Figure S8. Regional reliability ICC3 measures for the HNU dataset using a 10 test-retest design.** Bilateral, left, and right ICC3 values comparing cortical thickness (A, B, C), cortical surface area (D, E, F), and subcortical volumes (G, H, I) between versions. Outer concentric circles represent smaller ICC3 values, truncated at 0.70. Regions with the lowest reliability differ for cortical thickness and surface area.

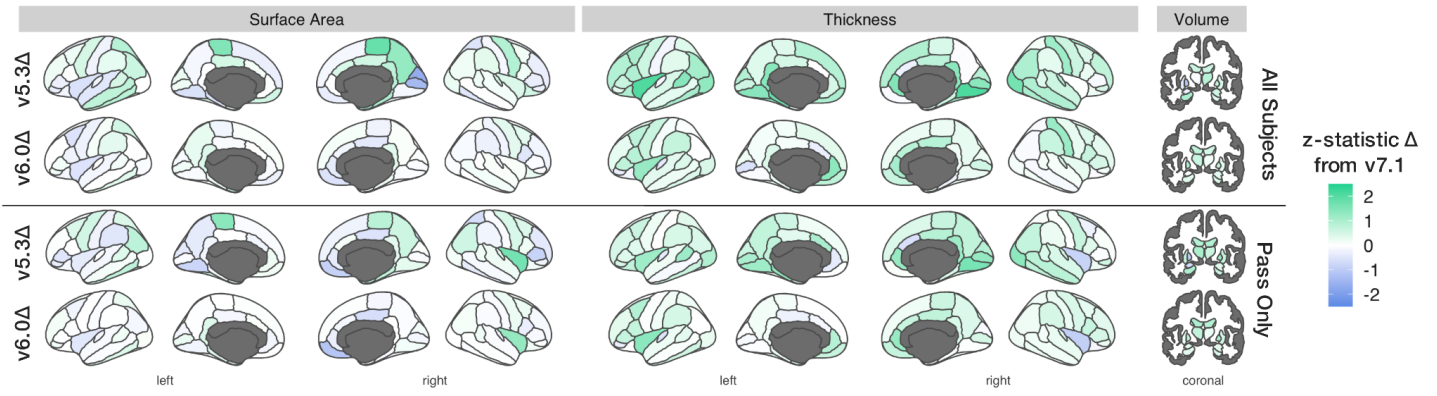

**Figure S9.** Difference in z-statistics ( $\Delta$ ) comparing v7.1 to the two previous versions.

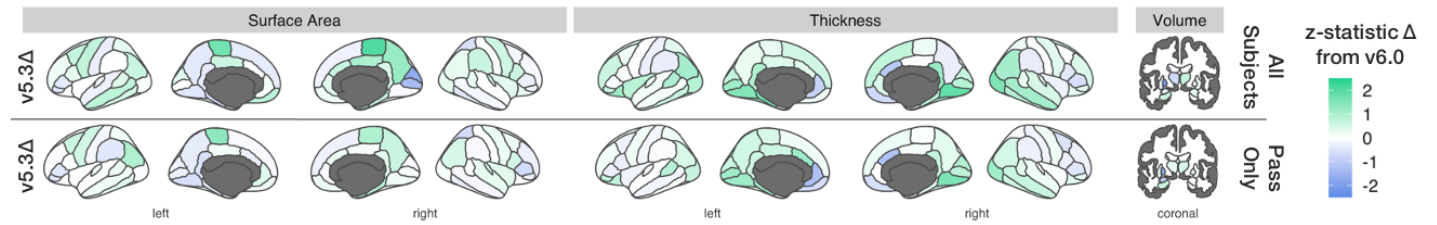

**Figure S10.** Difference in z-statistics ( $\Delta$ ) comparing v6.0 to v5.3.

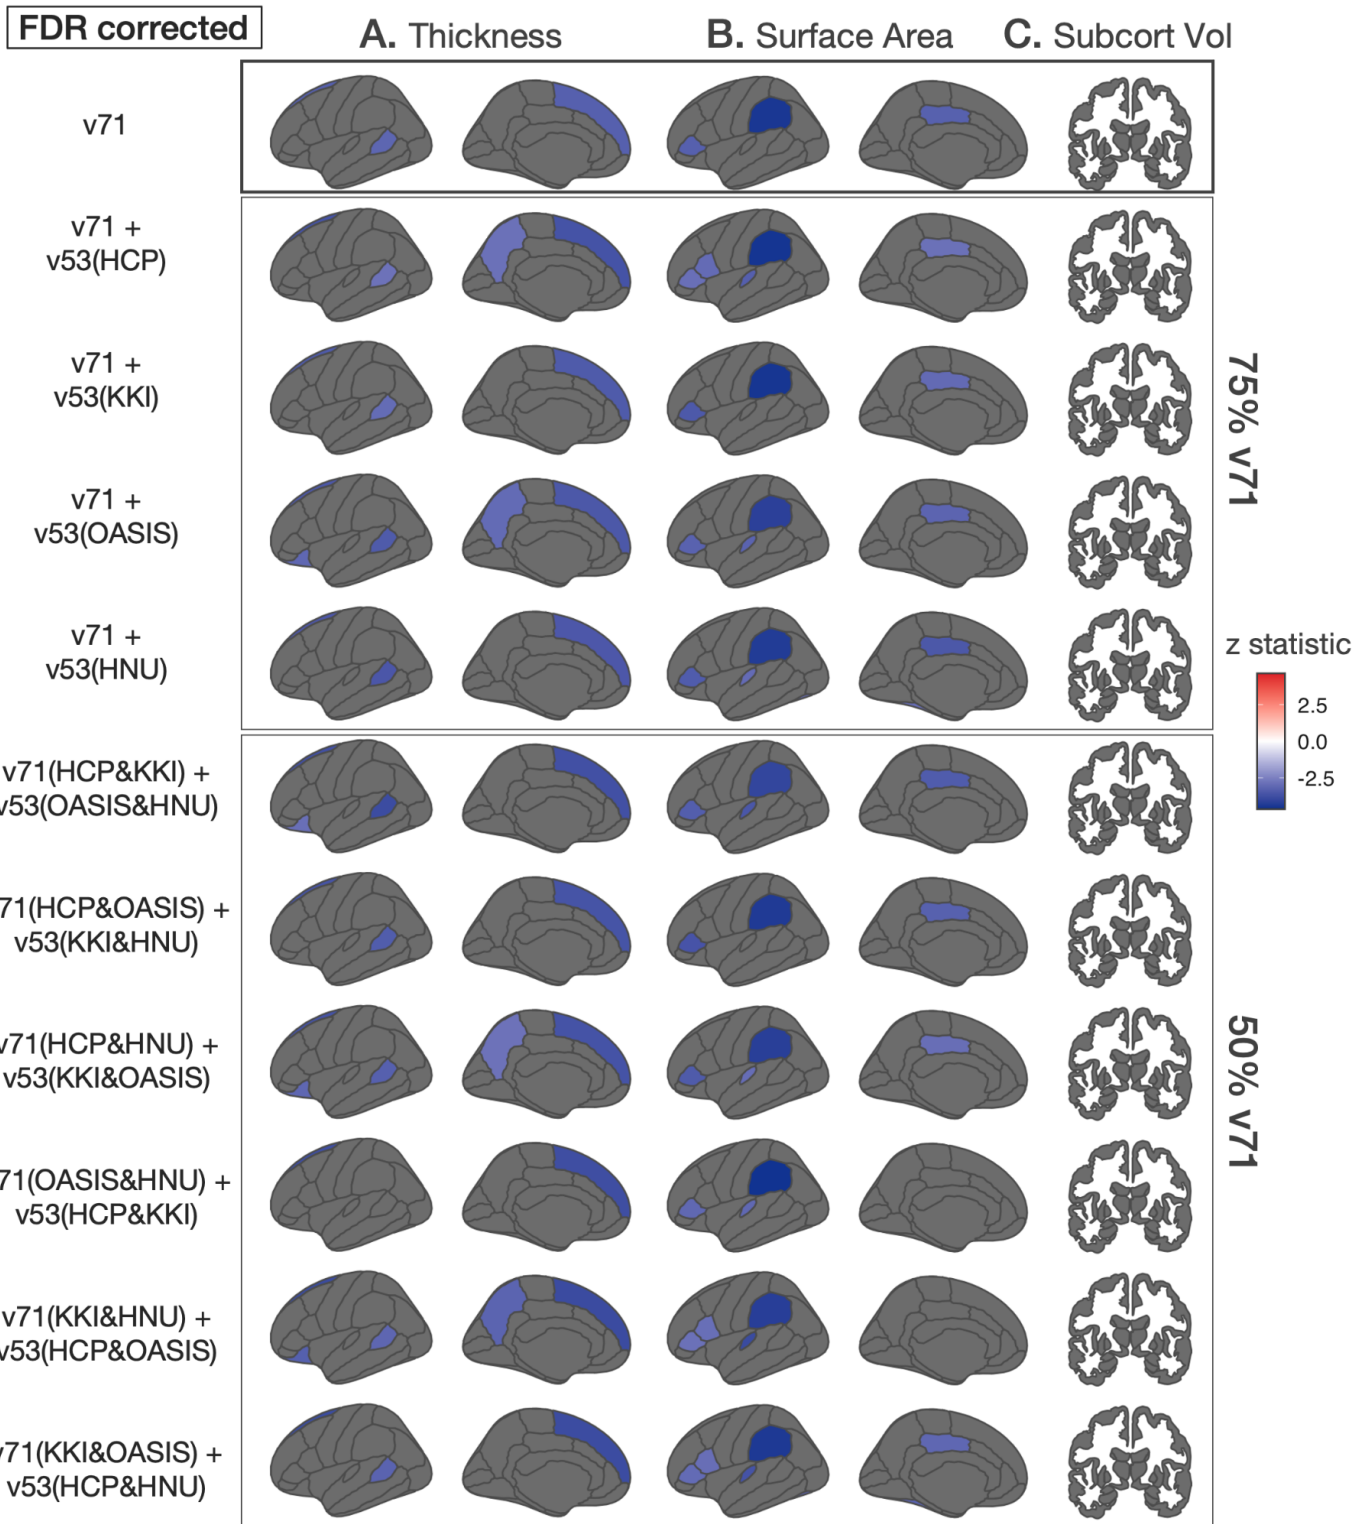

**Figure S11. Harmonized v7.1 vs. harmonized v7.1 with v5.3 cohort mixtures.** FDR-corrected significant z-statistics for **A.** thickness, **B.** surface area, and **C.** subcortical volume associations with age. Top box indicates the reference association results (all cohorts run through v7.1 before harmonization), middle box indicates associations after a single cohort was run through v5.3 (75% v7.1) before harmonization, and bottom box indicates association results after harmonizing two cohorts run with v5.3, and the other two with v7.1 (50% v7.1). The accumbens association with age was only significant in the v71(KKI&OASIS)+v53(HCP&HNU) comparison ( $z = -2.87$ ;  $q = 0.04$ ); not pictured.

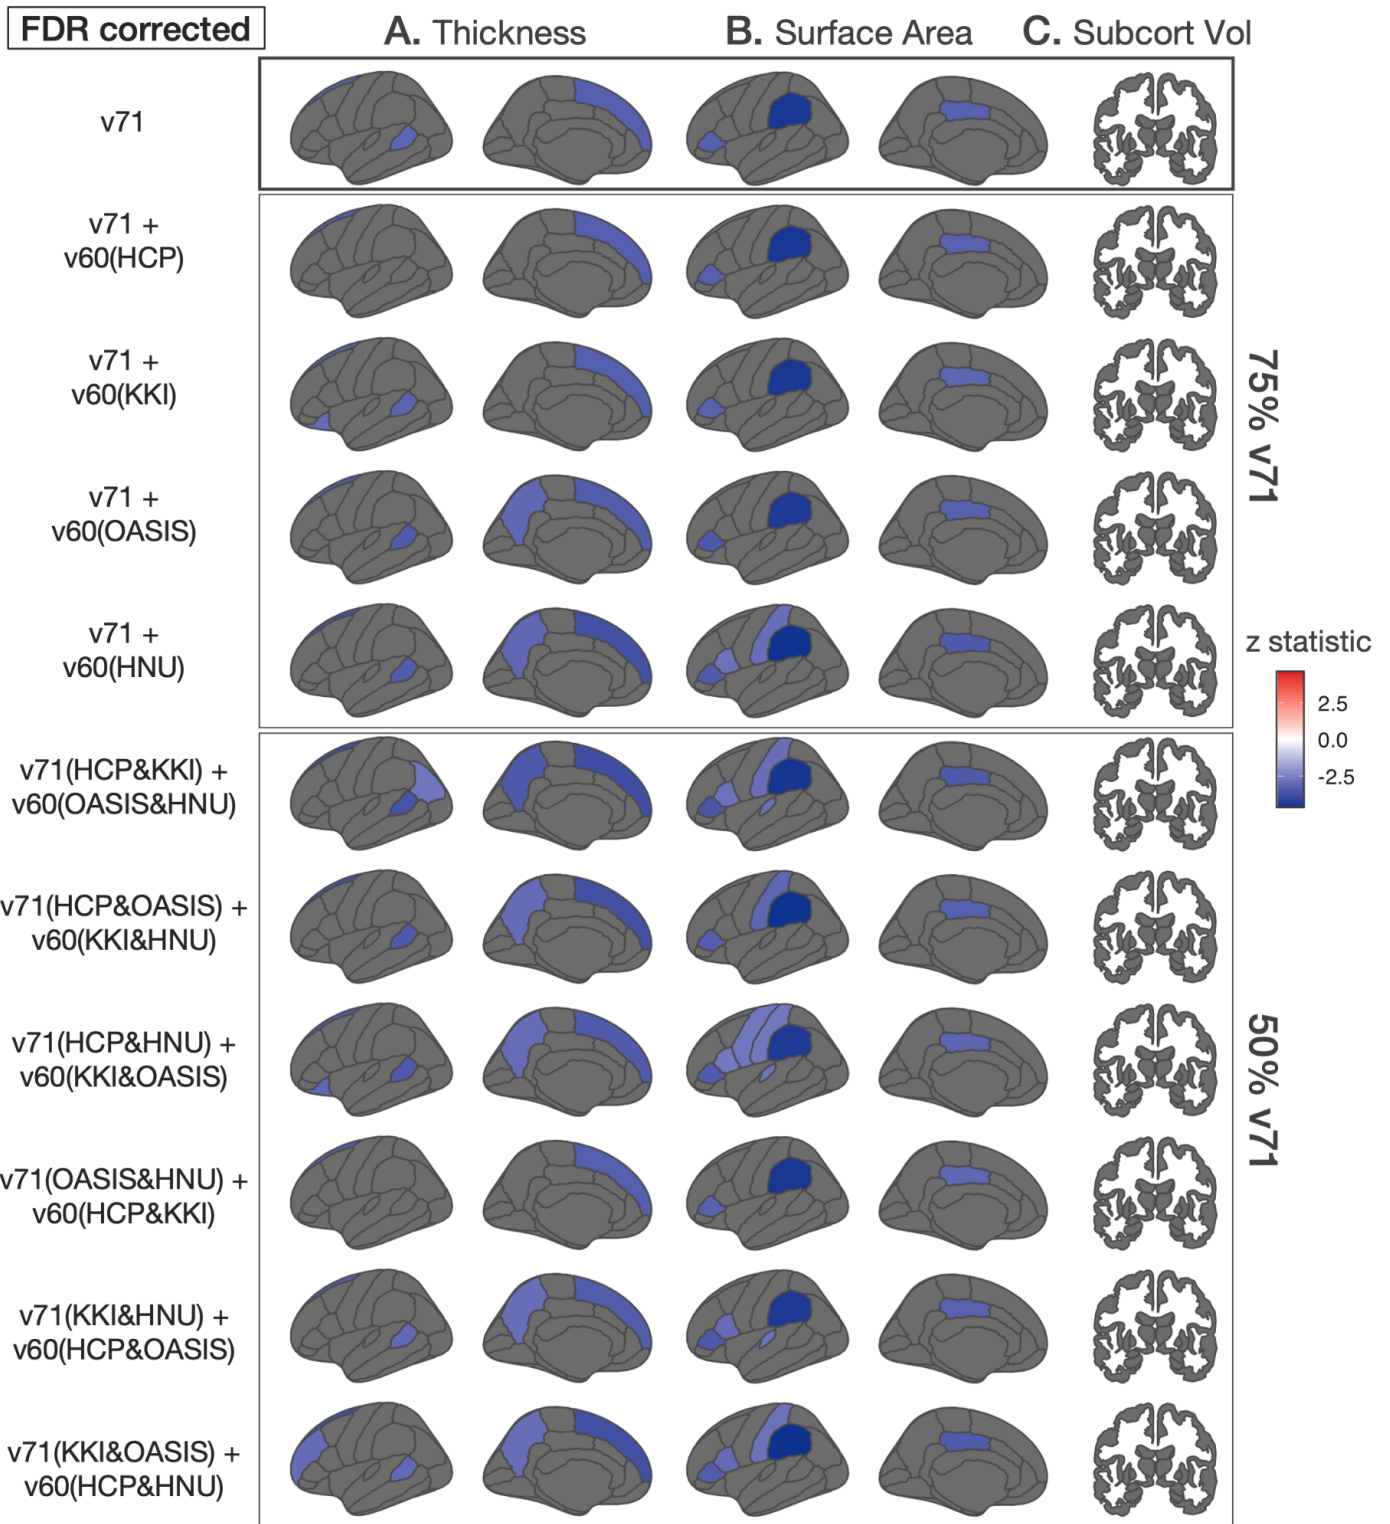

**Figure S12. Harmonized v7.1 vs. harmonized v7.1 with v6.0 cohort mixtures.** FDR-corrected significant z-statistics for **A.** thickness, **B.** surface area, and **C.** subcortical volume associations with age. Top box indicates the reference association results (all cohorts run through v7.1 before harmonization), middle box indicates associations after a single cohort was run through v6.0 (75% v7.1) before harmonization, and bottom box indicates association results after harmonizing two cohorts run with v6.0, and the other two with v7.1 (50% v7.1).

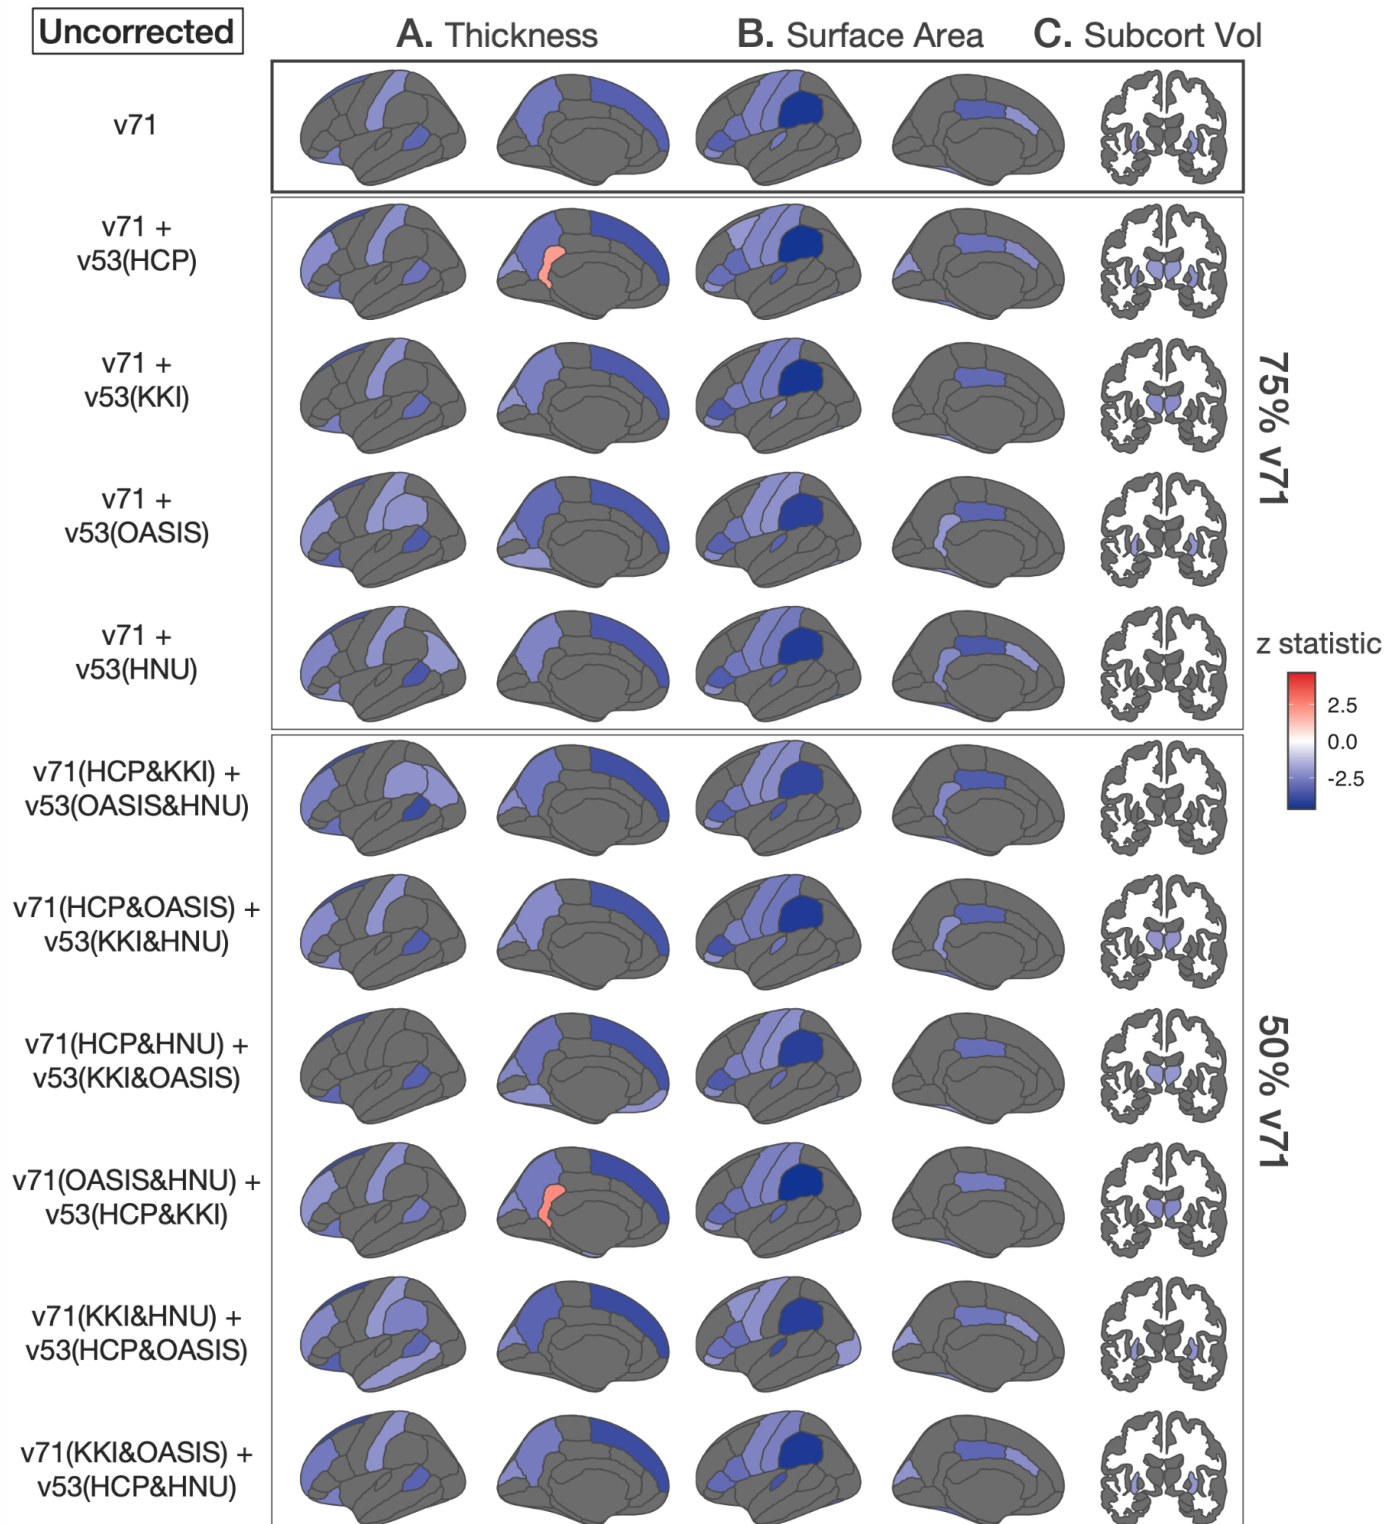

**Figure S13. Harmonized v7.1 vs. harmonized v7.1 with v5.3 cohort mixtures.** Uncorrected significant z-statistics for **A.** thickness, **B.** surface area, and **C.** subcortical volume associations with age. Top box indicates the reference association results (all cohorts run through v7.1 before harmonization), middle box indicates associations after a single cohort was run through v5.3 (75% v7.1) before harmonization, and bottom box indicates association results after harmonizing two cohorts run with v5.3, and the other two with v7.1 (50% v7.1). Significant associations between the accumbens volume and age were found in the v71+v53(HCP) comparison ( $z = -2.71$ ;  $p = 0.008$ ) and the v71(KKI&OASIS)+v53(HCP&HNU) comparison ( $z = -2.87$ ;  $p = 0.005$ ); not pictured.

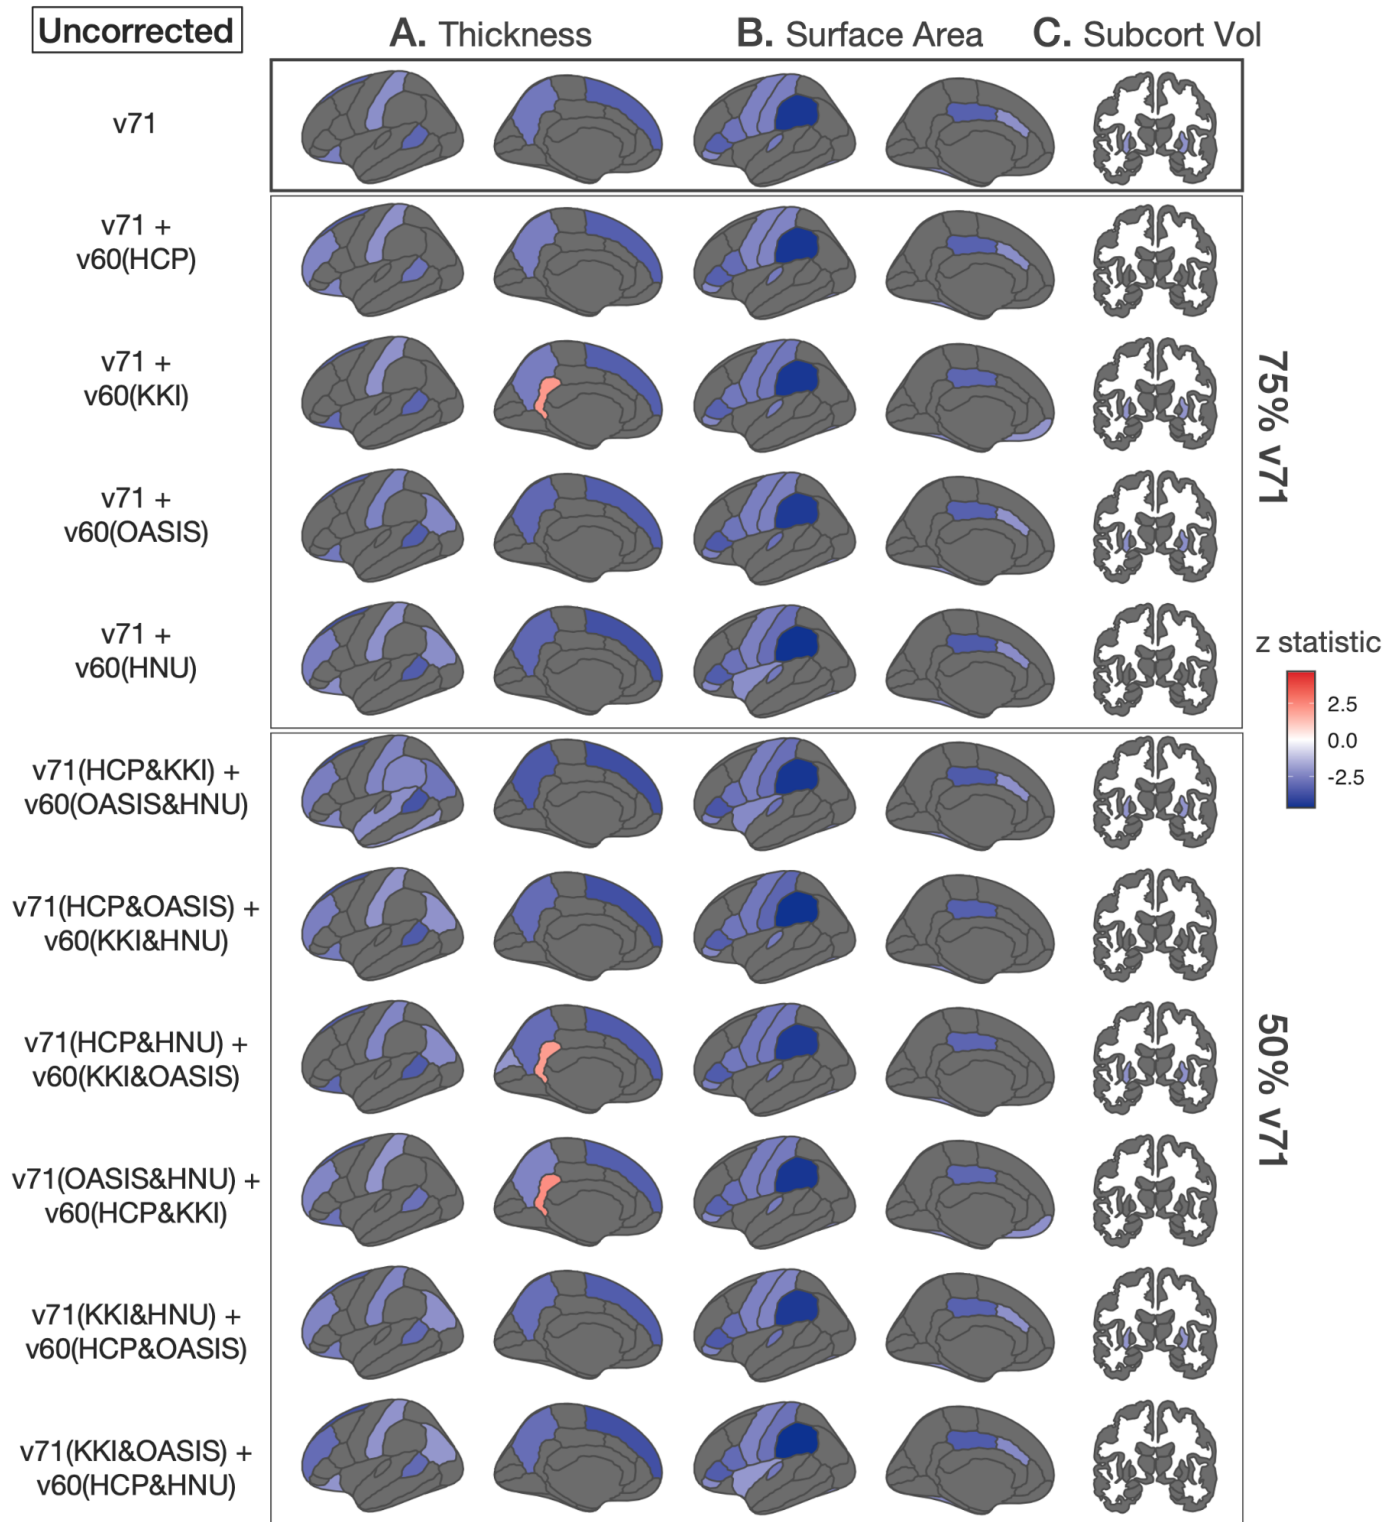

**Figure S14. Harmonized v7.1 vs. harmonized v7.1 with v6.0 cohort mixtures.** Uncorrected significant z-statistics for **A.** thickness, **B.** surface area, and **C.** subcortical volume associations with age. Top box indicates the reference association results (all cohorts run through v7.1 before harmonization), middle box indicates associations after a single cohort was run through v6.0 (75% v7.1) before harmonization, and bottom box indicates association results after harmonizing two cohorts run with v6.0, and the other two with v7.1 (50% v7.1). Significant associations between the accumbens volume and age were found for the v71+v60(HCP) comparison ( $z = -2.10$ ;  $p = 0.04$ ) and the v71(KKI&OASIS)+v60(HCP&HNU) comparison ( $z = -2.22$ ;  $p = 0.03$ ); not pictured.

**Table S1.** Runtimes for test-retest datasets across all three versions.

| Cohorts |     | v5.3 runtime (hours) | v6.0 runtime (hours) | v7.1 runtime (hours) |
|---------|-----|----------------------|----------------------|----------------------|
| HCP     | Avg | 6.64                 | 8.90                 | 6.27                 |
|         | Min | 5.44                 | 6.57                 | 5.46                 |
|         | Max | 14.20                | 11.56                | 7.59                 |
| KKI     | Avg | 7.80                 | 9.80                 | 6.67                 |
|         | Min | 6.51                 | 7.77                 | 5.75                 |
|         | Max | 9.61                 | 11.50                | 7.53                 |
| OASIS   | Avg | 3.93                 | 9.41                 | 6.50                 |
|         | Min | 3.19                 | 7.49                 | 5.65                 |
|         | Max | 6.46                 | 11.11                | 7.81                 |

**Table S2.** Mean Euler numbers extracted from the nofix surface and the final surface. Parenthesis indicate the min, and max values.

| Characteristic         | HCP            |                |              | KKI            |                |               | OASIS          |                |              |
|------------------------|----------------|----------------|--------------|----------------|----------------|---------------|----------------|----------------|--------------|
|                        | v5.3           | v6.0           | v7.1         | v5.3           | v6.0           | v7.1          | v5.3           | v6.0           | v7.1         |
| lh.orig.nofix holes    | 20 (7,46)      | 17 (4,38)      | 8 (2,18)     | 21 (7,51)      | 19 (4,46)      | 11 (3,33)     | 21 (5,39)      | 20 (7,47)      | 10 (1,23)    |
| rh.orig.nofix holes    | 22 (7,50)      | 17 (5,33)      | 9 (1,20)     | 23 (10,51)     | 21 (9,42)      | 10 (2,21)     | 18 (5,40)      | 16 (3,36)      | 8 (1,20)     |
| total orig.nofix holes | 42 (19,83)     | 34 (9,60)      | 17 (5,33)    | 44 (21,102)    | 40 (13,87)     | 20 (5,54)     | 40 (17,76)     | 36 (10,83)     | 18 (6,38)    |
| lh.orig.nofix euler    | -38 (-90,-12)  | -31 (-74,-6)   | -15 (-34,-2) | -40 (-100,-12) | -37 (-90,-6)   | -19 (-64,-4)  | -40 (-76,-8)   | -38 (-92,-12)  | -17 (-44,0)  |
| rh.orig.nofix euler    | -41 (-98,-12)  | -32 (-64,-8)   | -15 (-38,0)  | -43 (-100,-18) | -39 (-82,-16)  | -17 (-40,-2)  | -35 (-78,-8)   | -29 (-70,-4)   | -14 (-38,0)  |
| total orig.nofix euler | -79 (-162,-34) | -63 (-116,-14) | -30 (-62,-6) | -84 (-200,-38) | -76 (-170,-22) | -36 (-104,-6) | -75 (-148,-30) | -67 (-162,-16) | -32 (-72,-8) |
| lh.orig holes          | 0 (0,0)        | 0 (0,0)        | 0 (0,0)      | 0 (0,0)        | 0 (0,0)        | 0 (0,0)       | 0 (0,0)        | 0 (0,0)        | 0 (0,0)      |
| rh.orig holes          | 0 (0,0)        | 0 (0,0)        | 0 (0,0)      | 0 (0,0)        | 0 (0,0)        | 0 (0,0)       | 0 (0,0)        | 0 (0,0)        | 0 (0,0)      |
| total orig holes       | 0 (0,0)        | 0 (0,0)        | 0 (0,0)      | 0 (0,0)        | 0 (0,0)        | 0 (0,0)       | 0 (0,0)        | 0 (0,0)        | 0 (0,0)      |
| lh.orig euler          | 2 (2,2)        | 2 (2,2)        | 2 (2,2)      | 2 (2,2)        | 2 (2,2)        | 2 (2,2)       | 2 (2,2)        | 2 (2,2)        | 2 (2,2)      |
| rh.orig euler          | 2 (2,2)        | 2 (2,2)        | 2 (2,2)      | 2 (2,2)        | 2 (2,2)        | 2 (2,2)       | 2 (2,2)        | 2 (2,2)        | 2 (2,2)      |



**Table S3. HCP specific ICCs and associated statistics.**

| ROI                                  | Type | ICC    | F      | df1 | df2 | p        | lower bound | upper bound | comparison    | dataset |
|--------------------------------------|------|--------|--------|-----|-----|----------|-------------|-------------|---------------|---------|
| AVG_Accumbens                        | ICC3 | 0.9238 | 25.23  | 34  | 34  | 4.92E-16 | 0.869       | 0.956       | v5.3          | HCP     |
| AVG_Accumbens                        | ICC2 | 0.8780 | 17.33  | 34  | 34  | 1.69E-13 | 0.781       | 0.931       | v5.3 vs. v6.0 | HCP     |
| AVG_Accumbens                        | ICC2 | 0.8864 | 18.36  | 34  | 34  | 6.96E-14 | 0.799       | 0.936       | v5.3 vs. v7.1 | HCP     |
| AVG_Accumbens                        | ICC3 | 0.8815 | 15.88  | 34  | 34  | 6.35E-13 | 0.799       | 0.931       | v6.0          | HCP     |
| AVG_Accumbens                        | ICC2 | 0.9051 | 19.60  | 34  | 34  | 2.54E-14 | 0.838       | 0.945       | v6.0 vs. v7.1 | HCP     |
| AVG_Accumbens                        | ICC3 | 0.8995 | 18.91  | 34  | 34  | 4.42E-14 | 0.829       | 0.942       | v7.1          | HCP     |
| AVG_Amygdala                         | ICC3 | 0.9313 | 28.13  | 34  | 34  | 8.82E-17 | 0.881       | 0.961       | v5.3          | HCP     |
| AVG_Amygdala                         | ICC2 | 0.7964 | 34.27  | 34  | 34  | 3.73E-18 | 0.033       | 0.932       | v5.3 vs. v6.0 | HCP     |
| AVG_Amygdala                         | ICC2 | 0.8052 | 34.15  | 34  | 34  | 3.96E-18 | 0.049       | 0.934       | v5.3 vs. v7.1 | HCP     |
| AVG_Amygdala                         | ICC3 | 0.9621 | 51.78  | 34  | 34  | 4.57E-21 | 0.934       | 0.978       | v6.0          | HCP     |
| AVG_Amygdala                         | ICC2 | 0.9716 | 69.21  | 34  | 34  | 3.84E-23 | 0.950       | 0.984       | v6.0 vs. v7.1 | HCP     |
| AVG_Amygdala                         | ICC3 | 0.9601 | 49.07  | 34  | 34  | 1.10E-20 | 0.930       | 0.977       | v7.1          | HCP     |
| AVG_bankssts_thickavg                | ICC3 | 0.9110 | 21.48  | 34  | 34  | 6.14E-15 | 0.848       | 0.949       | v5.3          | HCP     |
| AVG_bankssts_thickavg                | ICC2 | 0.8970 | 19.04  | 34  | 34  | 3.99E-14 | 0.825       | 0.941       | v5.3 vs. v6.0 | HCP     |
| AVG_bankssts_thickavg                | ICC2 | 0.7439 | 19.14  | 34  | 34  | 3.68E-14 | 0.059       | 0.904       | v5.3 vs. v7.1 | HCP     |
| AVG_bankssts_thickavg                | ICC3 | 0.9208 | 24.25  | 34  | 34  | 9.21E-16 | 0.864       | 0.955       | v6.0          | HCP     |
| AVG_bankssts_thickavg                | ICC2 | 0.8134 | 40.52  | 34  | 34  | 2.50E-19 | 0.036       | 0.939       | v6.0 vs. v7.1 | HCP     |
| AVG_bankssts_thickavg                | ICC3 | 0.9474 | 37.06  | 34  | 34  | 1.06E-18 | 0.909       | 0.970       | v7.1          | HCP     |
| AVG_caudalanteriorcingulate_thickavg | ICC3 | 0.8251 | 10.44  | 34  | 34  | 3.01E-10 | 0.710       | 0.897       | v5.3          | HCP     |
| AVG_caudalanteriorcingulate_thickavg | ICC2 | 0.8243 | 10.76  | 34  | 34  | 1.95E-10 | 0.709       | 0.897       | v5.3 vs. v6.0 | HCP     |
| AVG_caudalanteriorcingulate_thickavg | ICC2 | 0.4188 | 7.88   | 34  | 34  | 1.45E-08 | -0.063      | 0.720       | v5.3 vs. v7.1 | HCP     |
| AVG_caudalanteriorcingulate_thickavg | ICC3 | 0.8324 | 10.94  | 34  | 34  | 1.54E-10 | 0.721       | 0.902       | v6.0          | HCP     |
| AVG_caudalanteriorcingulate_thickavg | ICC2 | 0.3526 | 11.39  | 34  | 34  | 8.63E-11 | -0.041      | 0.678       | v6.0 vs. v7.1 | HCP     |
| AVG_caudalanteriorcingulate_thickavg | ICC3 | 0.8727 | 14.71  | 34  | 34  | 2.00E-12 | 0.785       | 0.926       | v7.1          | HCP     |
| AVG_caudalmiddlefrontal_thickavg     | ICC3 | 0.8967 | 18.35  | 34  | 34  | 6.99E-14 | 0.824       | 0.940       | v5.3          | HCP     |
| AVG_caudalmiddlefrontal_thickavg     | ICC2 | 0.9228 | 32.83  | 34  | 34  | 7.45E-18 | 0.822       | 0.962       | v5.3 vs. v6.0 | HCP     |
| AVG_caudalmiddlefrontal_thickavg     | ICC2 | 0.8456 | 25.84  | 34  | 34  | 3.38E-16 | 0.346       | 0.941       | v5.3 vs. v7.1 | HCP     |
| AVG_caudalmiddlefrontal_thickavg     | ICC3 | 0.9106 | 21.37  | 34  | 34  | 6.64E-15 | 0.847       | 0.949       | v6.0          | HCP     |
| AVG_caudalmiddlefrontal_thickavg     | ICC2 | 0.7716 | 39.54  | 34  | 34  | 3.71E-19 | -0.006      | 0.925       | v6.0 vs. v7.1 | HCP     |
| AVG_caudalmiddlefrontal_thickavg     | ICC3 | 0.9396 | 32.09  | 34  | 34  | 1.07E-17 | 0.895       | 0.965       | v7.1          | HCP     |
| AVG_Caudate                          | ICC3 | 0.9792 | 95.09  | 34  | 34  | 1.96E-25 | 0.963       | 0.988       | v5.3          | HCP     |
| AVG_Caudate                          | ICC2 | 0.7902 | 75.91  | 34  | 34  | 8.30E-24 | -0.006      | 0.936       | v5.3 vs. v6.0 | HCP     |
| AVG_Caudate                          | ICC2 | 0.8029 | 52.63  | 34  | 34  | 3.49E-21 | 0.003       | 0.938       | v5.3 vs. v7.1 | HCP     |
| AVG_Caudate                          | ICC3 | 0.9852 | 134.17 | 34  | 34  | 6.21E-28 | 0.974       | 0.992       | v6.0          | HCP     |
| AVG_Caudate                          | ICC2 | 0.9846 | 146.05 | 34  | 34  | 1.50E-28 | 0.971       | 0.992       | v6.0 vs. v7.1 | HCP     |
| AVG_Caudate                          | ICC3 | 0.9764 | 83.90  | 34  | 34  | 1.58E-24 | 0.959       | 0.987       | v7.1          | HCP     |
| AVG_cuneus_thickavg                  | ICC3 | 0.9420 | 33.51  | 34  | 34  | 5.36E-18 | 0.900       | 0.967       | v5.3          | HCP     |
| AVG_cuneus_thickavg                  | ICC2 | 0.8560 | 23.83  | 34  | 34  | 1.21E-15 | 0.479       | 0.941       | v5.3 vs. v6.0 | HCP     |
| AVG_cuneus_thickavg                  | ICC2 | 0.8926 | 17.47  | 34  | 34  | 1.48E-13 | 0.818       | 0.938       | v5.3 vs. v7.1 | HCP     |
| AVG_cuneus_thickavg                  | ICC3 | 0.9469 | 36.65  | 34  | 34  | 1.27E-18 | 0.908       | 0.970       | v6.0          | HCP     |

|                               |      |        |        |    |    |          |        |       |               |     |
|-------------------------------|------|--------|--------|----|----|----------|--------|-------|---------------|-----|
| AVG_cuneus_thickavg           | ICC2 | 0.8641 | 43.51  | 34 | 34 | 7.85E-20 | 0.176  | 0.954 | v6.0 vs. v7.1 | HCP |
| AVG_cuneus_thickavg           | ICC3 | 0.9577 | 46.31  | 34 | 34 | 2.84E-20 | 0.926  | 0.976 | v7.1          | HCP |
| AVG_entorhinal_thickavg       | ICC3 | 0.8403 | 11.52  | 34 | 34 | 7.30E-11 | 0.733  | 0.907 | v5.3          | HCP |
| AVG_entorhinal_thickavg       | ICC2 | 0.9385 | 32.33  | 34 | 34 | 9.53E-18 | 0.894  | 0.965 | v5.3 vs. v6.0 | HCP |
| AVG_entorhinal_thickavg       | ICC2 | 0.5946 | 16.12  | 34 | 34 | 5.05E-13 | -0.045 | 0.841 | v5.3 vs. v7.1 | HCP |
| AVG_entorhinal_thickavg       | ICC3 | 0.8510 | 12.42  | 34 | 34 | 2.44E-11 | 0.750  | 0.913 | v6.0          | HCP |
| AVG_entorhinal_thickavg       | ICC2 | 0.6140 | 23.80  | 34 | 34 | 1.24E-15 | -0.038 | 0.857 | v6.0 vs. v7.1 | HCP |
| AVG_entorhinal_thickavg       | ICC3 | 0.8672 | 14.06  | 34 | 34 | 3.93E-12 | 0.776  | 0.923 | v7.1          | HCP |
| AVG_frontalpole_thickavg      | ICC3 | 0.7934 | 8.68   | 34 | 34 | 3.94E-09 | 0.661  | 0.878 | v5.3          | HCP |
| AVG_frontalpole_thickavg      | ICC2 | 0.7378 | 8.25   | 34 | 34 | 7.83E-09 | 0.515  | 0.855 | v5.3 vs. v6.0 | HCP |
| AVG_frontalpole_thickavg      | ICC2 | 0.6025 | 9.52   | 34 | 34 | 1.10E-09 | 0.005  | 0.827 | v5.3 vs. v7.1 | HCP |
| AVG_frontalpole_thickavg      | ICC3 | 0.8132 | 9.71   | 34 | 34 | 8.37E-10 | 0.691  | 0.890 | v6.0          | HCP |
| AVG_frontalpole_thickavg      | ICC2 | 0.7795 | 14.69  | 34 | 34 | 2.05E-12 | 0.330  | 0.905 | v6.0 vs. v7.1 | HCP |
| AVG_frontalpole_thickavg      | ICC3 | 0.8397 | 11.48  | 34 | 34 | 7.72E-11 | 0.732  | 0.906 | v7.1          | HCP |
| AVG_fusiform_thickavg         | ICC3 | 0.8970 | 18.41  | 34 | 34 | 6.68E-14 | 0.824  | 0.941 | v5.3          | HCP |
| AVG_fusiform_thickavg         | ICC2 | 0.9132 | 21.68  | 34 | 34 | 5.32E-15 | 0.852  | 0.950 | v5.3 vs. v6.0 | HCP |
| AVG_fusiform_thickavg         | ICC2 | 0.7225 | 22.15  | 34 | 34 | 3.82E-15 | -0.002 | 0.900 | v5.3 vs. v7.1 | HCP |
| AVG_fusiform_thickavg         | ICC3 | 0.9113 | 21.55  | 34 | 34 | 5.85E-15 | 0.848  | 0.949 | v6.0          | HCP |
| AVG_fusiform_thickavg         | ICC2 | 0.7125 | 60.81  | 34 | 34 | 3.25E-22 | -0.016 | 0.906 | v6.0 vs. v7.1 | HCP |
| AVG_fusiform_thickavg         | ICC3 | 0.9288 | 27.10  | 34 | 34 | 1.59E-16 | 0.877  | 0.959 | v7.1          | HCP |
| AVG_Hippocampus               | ICC3 | 0.8290 | 10.69  | 34 | 34 | 2.13E-10 | 0.716  | 0.900 | v5.3          | HCP |
| AVG_Hippocampus               | ICC2 | 0.9623 | 88.79  | 34 | 34 | 6.14E-25 | 0.849  | 0.985 | v5.3 vs. v6.0 | HCP |
| AVG_Hippocampus               | ICC2 | 0.9729 | 74.16  | 34 | 34 | 1.22E-23 | 0.953  | 0.985 | v5.3 vs. v7.1 | HCP |
| AVG_Hippocampus               | ICC3 | 0.9731 | 73.43  | 34 | 34 | 1.44E-23 | 0.953  | 0.985 | v6.0          | HCP |
| AVG_Hippocampus               | ICC2 | 0.9713 | 95.15  | 34 | 34 | 1.94E-25 | 0.924  | 0.986 | v6.0 vs. v7.1 | HCP |
| AVG_Hippocampus               | ICC3 | 0.9814 | 106.72 | 34 | 34 | 2.86E-26 | 0.967  | 0.989 | v7.1          | HCP |
| AVG_inferiorparietal_thickavg | ICC3 | 0.9507 | 39.57  | 34 | 34 | 3.66E-19 | 0.914  | 0.972 | v5.3          | HCP |
| AVG_inferiorparietal_thickavg | ICC2 | 0.9581 | 45.57  | 34 | 34 | 3.68E-20 | 0.927  | 0.976 | v5.3 vs. v6.0 | HCP |
| AVG_inferiorparietal_thickavg | ICC2 | 0.7704 | 27.09  | 34 | 34 | 1.60E-16 | 0.029  | 0.920 | v5.3 vs. v7.1 | HCP |
| AVG_inferiorparietal_thickavg | ICC3 | 0.9475 | 37.07  | 34 | 34 | 1.05E-18 | 0.909  | 0.970 | v6.0          | HCP |
| AVG_inferiorparietal_thickavg | ICC2 | 0.7816 | 75.87  | 34 | 34 | 8.38E-24 | -0.007 | 0.933 | v6.0 vs. v7.1 | HCP |
| AVG_inferiorparietal_thickavg | ICC3 | 0.9547 | 43.13  | 34 | 34 | 9.04E-20 | 0.921  | 0.974 | v7.1          | HCP |
| AVG_inferiortemporal_thickavg | ICC3 | 0.8988 | 18.76  | 34 | 34 | 5.01E-14 | 0.827  | 0.942 | v5.3          | HCP |
| AVG_inferiortemporal_thickavg | ICC2 | 0.9156 | 35.36  | 34 | 34 | 2.26E-18 | 0.740  | 0.963 | v5.3 vs. v6.0 | HCP |
| AVG_inferiortemporal_thickavg | ICC2 | 0.5947 | 24.44  | 34 | 34 | 8.15E-16 | -0.037 | 0.848 | v5.3 vs. v7.1 | HCP |
| AVG_inferiortemporal_thickavg | ICC3 | 0.9080 | 20.75  | 34 | 34 | 1.06E-14 | 0.843  | 0.947 | v6.0          | HCP |
| AVG_inferiortemporal_thickavg | ICC2 | 0.7107 | 41.36  | 34 | 34 | 1.79E-19 | -0.023 | 0.903 | v6.0 vs. v7.1 | HCP |
| AVG_inferiortemporal_thickavg | ICC3 | 0.9202 | 24.07  | 34 | 34 | 1.03E-15 | 0.863  | 0.954 | v7.1          | HCP |
| AVG_insula_thickavg           | ICC3 | 0.8566 | 12.95  | 34 | 34 | 1.33E-11 | 0.759  | 0.916 | v5.3          | HCP |
| AVG_insula_thickavg           | ICC2 | 0.8325 | 12.11  | 34 | 34 | 3.56E-11 | 0.711  | 0.904 | v5.3 vs. v6.0 | HCP |
| AVG_insula_thickavg           | ICC2 | 0.7952 | 16.65  | 34 | 34 | 3.08E-13 | 0.329  | 0.914 | v5.3 vs. v7.1 | HCP |
| AVG_insula_thickavg           | ICC3 | 0.8602 | 13.31  | 34 | 34 | 8.90E-12 | 0.765  | 0.919 | v6.0          | HCP |
| AVG_insula_thickavg           | ICC2 | 0.6638 | 10.09  | 34 | 34 | 4.84E-10 | 0.104  | 0.852 | v6.0 vs. v7.1 | HCP |
| AVG_insula_thickavg           | ICC3 | 0.8847 | 16.34  | 34 | 34 | 4.11E-13 | 0.804  | 0.933 | v7.1          | HCP |

|                                   |      |        |         |    |    |          |        |       |               |     |
|-----------------------------------|------|--------|---------|----|----|----------|--------|-------|---------------|-----|
| AVG_isthmuscingulate_thickavg     | ICC3 | 0.8600 | 13.29   | 34 | 34 | 9.09E-12 | 0.765  | 0.919 | v5.3          | HCP |
| AVG_isthmuscingulate_thickavg     | ICC2 | 0.6365 | 7.49    | 34 | 34 | 2.87E-08 | 0.186  | 0.823 | v5.3 vs. v6.0 | HCP |
| AVG_isthmuscingulate_thickavg     | ICC2 | 0.2349 | 7.71    | 34 | 34 | 1.95E-08 | -0.038 | 0.546 | v5.3 vs. v7.1 | HCP |
| AVG_isthmuscingulate_thickavg     | ICC3 | 0.8625 | 13.55   | 34 | 34 | 6.81E-12 | 0.769  | 0.920 | v6.0          | HCP |
| AVG_isthmuscingulate_thickavg     | ICC2 | 0.3705 | 12.14   | 34 | 34 | 3.41E-11 | -0.041 | 0.694 | v6.0 vs. v7.1 | HCP |
| AVG_isthmuscingulate_thickavg     | ICC3 | 0.8945 | 17.95   | 34 | 34 | 9.82E-14 | 0.820  | 0.939 | v7.1          | HCP |
| AVG_lateraloccipital_thickavg     | ICC3 | 0.9694 | 64.30   | 34 | 34 | 1.29E-22 | 0.946  | 0.983 | v5.3          | HCP |
| AVG_lateraloccipital_thickavg     | ICC2 | 0.9553 | 46.51   | 34 | 34 | 2.64E-20 | 0.921  | 0.975 | v5.3 vs. v6.0 | HCP |
| AVG_lateraloccipital_thickavg     | ICC2 | 0.8591 | 30.42   | 34 | 34 | 2.53E-17 | 0.336  | 0.948 | v5.3 vs. v7.1 | HCP |
| AVG_lateraloccipital_thickavg     | ICC3 | 0.9452 | 35.49   | 34 | 34 | 2.12E-18 | 0.905  | 0.969 | v6.0          | HCP |
| AVG_lateraloccipital_thickavg     | ICC2 | 0.8471 | 103.38  | 34 | 34 | 4.87E-26 | 0.014  | 0.955 | v6.0 vs. v7.1 | HCP |
| AVG_lateraloccipital_thickavg     | ICC3 | 0.9674 | 60.37   | 34 | 34 | 3.67E-22 | 0.943  | 0.981 | v7.1          | HCP |
| AVG_lateralorbitofrontal_thickavg | ICC3 | 0.8960 | 18.24   | 34 | 34 | 7.70E-14 | 0.823  | 0.940 | v5.3          | HCP |
| AVG_lateralorbitofrontal_thickavg | ICC2 | 0.8975 | 25.08   | 34 | 34 | 5.41E-16 | 0.758  | 0.949 | v5.3 vs. v6.0 | HCP |
| AVG_lateralorbitofrontal_thickavg | ICC2 | 0.7570 | 15.10   | 34 | 34 | 1.36E-12 | 0.204  | 0.900 | v5.3 vs. v7.1 | HCP |
| AVG_lateralorbitofrontal_thickavg | ICC3 | 0.8992 | 18.85   | 34 | 34 | 4.66E-14 | 0.828  | 0.942 | v6.0          | HCP |
| AVG_lateralorbitofrontal_thickavg | ICC2 | 0.6804 | 31.21   | 34 | 34 | 1.68E-17 | -0.030 | 0.889 | v6.0 vs. v7.1 | HCP |
| AVG_lateralorbitofrontal_thickavg | ICC3 | 0.8616 | 13.45   | 34 | 34 | 7.59E-12 | 0.767  | 0.919 | v7.1          | HCP |
| AVG_LateralVentricle              | ICC3 | 0.9951 | 409.70  | 34 | 34 | 4.18E-36 | 0.991  | 0.997 | v5.3          | HCP |
| AVG_LateralVentricle              | ICC2 | 0.9722 | 653.89  | 34 | 34 | 1.52E-39 | 0.254  | 0.993 | v5.3 vs. v6.0 | HCP |
| AVG_LateralVentricle              | ICC2 | 0.9691 | 482.71  | 34 | 34 | 2.60E-37 | 0.270  | 0.992 | v5.3 vs. v7.1 | HCP |
| AVG_LateralVentricle              | ICC3 | 0.9959 | 485.34  | 34 | 34 | 2.37E-37 | 0.993  | 0.998 | v6.0          | HCP |
| AVG_LateralVentricle              | ICC2 | 0.9996 | 5694.19 | 34 | 34 | 1.67E-55 | 0.999  | 1.000 | v6.0 vs. v7.1 | HCP |
| AVG_LateralVentricle              | ICC3 | 0.9964 | 552.86  | 34 | 34 | 2.61E-38 | 0.994  | 0.998 | v7.1          | HCP |
| AVG_lingual_thickavg              | ICC3 | 0.9380 | 31.23   | 34 | 34 | 1.66E-17 | 0.893  | 0.965 | v5.3          | HCP |
| AVG_lingual_thickavg              | ICC2 | 0.8688 | 19.85   | 34 | 34 | 2.09E-14 | 0.685  | 0.936 | v5.3 vs. v6.0 | HCP |
| AVG_lingual_thickavg              | ICC2 | 0.7674 | 14.78   | 34 | 34 | 1.86E-12 | 0.265  | 0.902 | v5.3 vs. v7.1 | HCP |
| AVG_lingual_thickavg              | ICC3 | 0.8910 | 17.35   | 34 | 34 | 1.66E-13 | 0.815  | 0.937 | v6.0          | HCP |
| AVG_lingual_thickavg              | ICC2 | 0.6925 | 51.27   | 34 | 34 | 5.37E-21 | -0.019 | 0.898 | v6.0 vs. v7.1 | HCP |
| AVG_lingual_thickavg              | ICC3 | 0.9307 | 27.84   | 34 | 34 | 1.04E-16 | 0.880  | 0.960 | v7.1          | HCP |
| AVG_medialorbitofrontal_thickavg  | ICC3 | 0.7621 | 7.41    | 34 | 34 | 3.34E-08 | 0.614  | 0.858 | v5.3          | HCP |
| AVG_medialorbitofrontal_thickavg  | ICC2 | 0.7982 | 13.89   | 34 | 34 | 4.72E-12 | 0.475  | 0.906 | v5.3 vs. v6.0 | HCP |
| AVG_medialorbitofrontal_thickavg  | ICC2 | 0.7975 | 13.37   | 34 | 34 | 8.26E-12 | 0.497  | 0.903 | v5.3 vs. v7.1 | HCP |
| AVG_medialorbitofrontal_thickavg  | ICC3 | 0.8765 | 15.20   | 34 | 34 | 1.23E-12 | 0.791  | 0.928 | v6.0          | HCP |
| AVG_medialorbitofrontal_thickavg  | ICC2 | 0.6251 | 16.78   | 34 | 34 | 2.76E-13 | -0.040 | 0.856 | v6.0 vs. v7.1 | HCP |
| AVG_medialorbitofrontal_thickavg  | ICC3 | 0.8553 | 12.82   | 34 | 34 | 1.54E-11 | 0.757  | 0.916 | v7.1          | HCP |
| AVG_middletemporal_thickavg       | ICC3 | 0.9424 | 33.71   | 34 | 34 | 4.87E-18 | 0.900  | 0.967 | v5.3          | HCP |
| AVG_middletemporal_thickavg       | ICC2 | 0.9215 | 59.67   | 34 | 34 | 4.44E-22 | 0.496  | 0.972 | v5.3 vs. v6.0 | HCP |
| AVG_middletemporal_thickavg       | ICC2 | 0.6198 | 41.24   | 34 | 34 | 1.87E-19 | -0.023 | 0.865 | v5.3 vs. v7.1 | HCP |
| AVG_middletemporal_thickavg       | ICC3 | 0.9505 | 39.37   | 34 | 34 | 3.97E-19 | 0.914  | 0.972 | v6.0          | HCP |
| AVG_middletemporal_thickavg       | ICC2 | 0.7677 | 100.18  | 34 | 34 | 8.22E-26 | -0.005 | 0.929 | v6.0 vs. v7.1 | HCP |
| AVG_middletemporal_thickavg       | ICC3 | 0.9610 | 50.32   | 34 | 34 | 7.29E-21 | 0.932  | 0.978 | v7.1          | HCP |
| AVG Pallidum                      | ICC3 | 0.8373 | 11.29   | 34 | 34 | 9.72E-11 | 0.729  | 0.905 | v5.3          | HCP |
| AVG Pallidum                      | ICC2 | 0.1837 | 4.89    | 34 | 34 | 5.83E-06 | -0.045 | 0.465 | v5.3 vs. v6.0 | HCP |

|                               |      |        |        |    |    |          |        |       |               |     |
|-------------------------------|------|--------|--------|----|----|----------|--------|-------|---------------|-----|
| AVG Pallidum                  | ICC2 | 0.1801 | 5.98   | 34 | 34 | 5.20E-07 | -0.036 | 0.463 | v5.3 vs. v7.1 | HCP |
| AVG Pallidum                  | ICC3 | 0.8772 | 15.28  | 34 | 34 | 1.13E-12 | 0.792  | 0.929 | v6.0          | HCP |
| AVG Pallidum                  | ICC2 | 0.8918 | 19.51  | 34 | 34 | 2.73E-14 | 0.807  | 0.939 | v6.0 vs. v7.1 | HCP |
| AVG Pallidum                  | ICC3 | 0.9480 | 37.46  | 34 | 34 | 8.91E-19 | 0.910  | 0.970 | v7.1          | HCP |
| AVG paracentral_thickavg      | ICC3 | 0.9573 | 45.84  | 34 | 34 | 3.35E-20 | 0.926  | 0.976 | v5.3          | HCP |
| AVG paracentral_thickavg      | ICC2 | 0.8812 | 21.85  | 34 | 34 | 4.73E-15 | 0.716  | 0.942 | v5.3 vs. v6.0 | HCP |
| AVG paracentral_thickavg      | ICC2 | 0.9392 | 32.00  | 34 | 34 | 1.12E-17 | 0.895  | 0.965 | v5.3 vs. v7.1 | HCP |
| AVG paracentral_thickavg      | ICC3 | 0.9484 | 37.76  | 34 | 34 | 7.81E-19 | 0.910  | 0.971 | v6.0          | HCP |
| AVG paracentral_thickavg      | ICC2 | 0.9538 | 77.08  | 34 | 34 | 6.44E-24 | 0.792  | 0.982 | v6.0 vs. v7.1 | HCP |
| AVG paracentral_thickavg      | ICC3 | 0.9537 | 42.15  | 34 | 34 | 1.31E-19 | 0.919  | 0.974 | v7.1          | HCP |
| AVG parahippocampal_thickavg  | ICC3 | 0.9431 | 34.18  | 34 | 34 | 3.91E-18 | 0.901  | 0.968 | v5.3          | HCP |
| AVG parahippocampal_thickavg  | ICC2 | 0.9816 | 104.63 | 34 | 34 | 3.98E-26 | 0.968  | 0.990 | v5.3 vs. v6.0 | HCP |
| AVG parahippocampal_thickavg  | ICC2 | 0.8069 | 35.49  | 34 | 34 | 2.13E-18 | 0.046  | 0.935 | v5.3 vs. v7.1 | HCP |
| AVG parahippocampal_thickavg  | ICC3 | 0.9603 | 49.32  | 34 | 34 | 1.01E-20 | 0.931  | 0.977 | v6.0          | HCP |
| AVG parahippocampal_thickavg  | ICC2 | 0.8229 | 87.13  | 34 | 34 | 8.42E-25 | 0.004  | 0.947 | v6.0 vs. v7.1 | HCP |
| AVG parahippocampal_thickavg  | ICC3 | 0.9597 | 48.67  | 34 | 34 | 1.26E-20 | 0.930  | 0.977 | v7.1          | HCP |
| AVG parsopercularis_thickavg  | ICC3 | 0.9016 | 19.32  | 34 | 34 | 3.17E-14 | 0.832  | 0.943 | v5.3          | HCP |
| AVG parsopercularis_thickavg  | ICC2 | 0.8910 | 37.77  | 34 | 34 | 7.78E-19 | 0.462  | 0.959 | v5.3 vs. v6.0 | HCP |
| AVG parsopercularis_thickavg  | ICC2 | 0.9210 | 28.69  | 34 | 34 | 6.42E-17 | 0.847  | 0.957 | v5.3 vs. v7.1 | HCP |
| AVG parsopercularis_thickavg  | ICC3 | 0.9210 | 24.33  | 34 | 34 | 8.75E-16 | 0.864  | 0.955 | v6.0          | HCP |
| AVG parsopercularis_thickavg  | ICC2 | 0.8197 | 35.36  | 34 | 34 | 2.26E-18 | 0.076  | 0.939 | v6.0 vs. v7.1 | HCP |
| AVG parsopercularis_thickavg  | ICC3 | 0.9299 | 27.53  | 34 | 34 | 1.24E-16 | 0.879  | 0.960 | v7.1          | HCP |
| AVG parsorbitalis_thickavg    | ICC3 | 0.9058 | 20.22  | 34 | 34 | 1.57E-14 | 0.839  | 0.946 | v5.3          | HCP |
| AVG parsorbitalis_thickavg    | ICC2 | 0.9356 | 29.72  | 34 | 34 | 3.66E-17 | 0.889  | 0.963 | v5.3 vs. v6.0 | HCP |
| AVG parsorbitalis_thickavg    | ICC2 | 0.6764 | 14.32  | 34 | 34 | 3.00E-12 | 0.013  | 0.872 | v5.3 vs. v7.1 | HCP |
| AVG parsorbitalis_thickavg    | ICC3 | 0.9133 | 22.08  | 34 | 34 | 4.00E-15 | 0.851  | 0.950 | v6.0          | HCP |
| AVG parsorbitalis_thickavg    | ICC2 | 0.7154 | 27.13  | 34 | 34 | 1.57E-16 | -0.021 | 0.901 | v6.0 vs. v7.1 | HCP |
| AVG parsorbitalis_thickavg    | ICC3 | 0.9085 | 20.86  | 34 | 34 | 9.67E-15 | 0.843  | 0.947 | v7.1          | HCP |
| AVG parstriangularis_thickavg | ICC3 | 0.8680 | 14.15  | 34 | 34 | 3.57E-12 | 0.777  | 0.923 | v5.3          | HCP |
| AVG parstriangularis_thickavg | ICC2 | 0.9156 | 27.62  | 34 | 34 | 1.18E-16 | 0.830  | 0.955 | v5.3 vs. v6.0 | HCP |
| AVG parstriangularis_thickavg | ICC2 | 0.7929 | 17.09  | 34 | 34 | 2.08E-13 | 0.299  | 0.915 | v5.3 vs. v7.1 | HCP |
| AVG parstriangularis_thickavg | ICC3 | 0.9047 | 20.00  | 34 | 34 | 1.87E-14 | 0.837  | 0.945 | v6.0          | HCP |
| AVG parstriangularis_thickavg | ICC2 | 0.7525 | 33.87  | 34 | 34 | 4.51E-18 | -0.010 | 0.917 | v6.0 vs. v7.1 | HCP |
| AVG parstriangularis_thickavg | ICC3 | 0.9259 | 25.98  | 34 | 34 | 3.11E-16 | 0.872  | 0.957 | v7.1          | HCP |
| AVG pericalcarine_thickavg    | ICC3 | 0.8964 | 18.31  | 34 | 34 | 7.24E-14 | 0.824  | 0.940 | v5.3          | HCP |
| AVG pericalcarine_thickavg    | ICC2 | 0.8006 | 14.45  | 34 | 34 | 2.62E-12 | 0.461  | 0.908 | v5.3 vs. v6.0 | HCP |
| AVG pericalcarine_thickavg    | ICC2 | 0.8446 | 11.56  | 34 | 34 | 6.93E-11 | 0.740  | 0.909 | v5.3 vs. v7.1 | HCP |
| AVG pericalcarine_thickavg    | ICC3 | 0.8758 | 15.11  | 34 | 34 | 1.34E-12 | 0.790  | 0.928 | v6.0          | HCP |
| AVG pericalcarine_thickavg    | ICC2 | 0.8555 | 25.64  | 34 | 34 | 3.83E-16 | 0.424  | 0.943 | v6.0 vs. v7.1 | HCP |
| AVG pericalcarine_thickavg    | ICC3 | 0.9238 | 25.26  | 34 | 34 | 4.83E-16 | 0.869  | 0.956 | v7.1          | HCP |
| AVG postcentral_thickavg      | ICC3 | 0.9773 | 87.22  | 34 | 34 | 8.27E-25 | 0.960  | 0.987 | v5.3          | HCP |
| AVG postcentral_thickavg      | ICC2 | 0.9066 | 56.77  | 34 | 34 | 1.01E-21 | 0.357  | 0.968 | v5.3 vs. v6.0 | HCP |
| AVG postcentral_thickavg      | ICC2 | 0.9492 | 37.78  | 34 | 34 | 7.74E-19 | 0.912  | 0.971 | v5.3 vs. v7.1 | HCP |
| AVG postcentral_thickavg      | ICC3 | 0.9629 | 52.90  | 34 | 34 | 3.21E-21 | 0.935  | 0.979 | v6.0          | HCP |

|                                       |      |        |       |    |    |          |        |       |               |     |
|---------------------------------------|------|--------|-------|----|----|----------|--------|-------|---------------|-----|
| AVG_postcentral_thickavg              | ICC2 | 0.8879 | 30.33 | 34 | 34 | 2.66E-17 | 0.581  | 0.954 | v6.0 vs. v7.1 | HCP |
| AVG_postcentral_thickavg              | ICC3 | 0.9587 | 47.42 | 34 | 34 | 1.92E-20 | 0.928  | 0.976 | v7.1          | HCP |
| AVG_posteriorcingulate_thickavg       | ICC3 | 0.8809 | 15.79 | 34 | 34 | 6.90E-13 | 0.798  | 0.931 | v5.3          | HCP |
| AVG_posteriorcingulate_thickavg       | ICC2 | 0.8433 | 14.70 | 34 | 34 | 2.02E-12 | 0.687  | 0.917 | v5.3 vs. v6.0 | HCP |
| AVG_posteriorcingulate_thickavg       | ICC2 | 0.3597 | 15.12 | 34 | 34 | 1.33E-12 | -0.032 | 0.688 | v5.3 vs. v7.1 | HCP |
| AVG_posteriorcingulate_thickavg       | ICC3 | 0.9094 | 21.08 | 34 | 34 | 8.25E-15 | 0.845  | 0.948 | v6.0          | HCP |
| AVG_posteriorcingulate_thickavg       | ICC2 | 0.4682 | 20.35 | 34 | 34 | 1.43E-14 | -0.033 | 0.774 | v6.0 vs. v7.1 | HCP |
| AVG_posteriorcingulate_thickavg       | ICC3 | 0.9324 | 28.58 | 34 | 34 | 6.84E-17 | 0.883  | 0.961 | v7.1          | HCP |
| AVG_precentral_thickavg               | ICC3 | 0.9377 | 31.11 | 34 | 34 | 1.77E-17 | 0.892  | 0.964 | v5.3          | HCP |
| AVG_precentral_thickavg               | ICC2 | 0.9010 | 57.12 | 34 | 34 | 9.12E-22 | 0.300  | 0.967 | v5.3 vs. v6.0 | HCP |
| AVG_precentral_thickavg               | ICC2 | 0.9395 | 38.14 | 34 | 34 | 6.64E-19 | 0.880  | 0.968 | v5.3 vs. v7.1 | HCP |
| AVG_precentral_thickavg               | ICC3 | 0.9080 | 20.75 | 34 | 34 | 1.05E-14 | 0.843  | 0.947 | v6.0          | HCP |
| AVG_precentral_thickavg               | ICC2 | 0.8251 | 37.67 | 34 | 34 | 8.12E-19 | 0.074  | 0.942 | v6.0 vs. v7.1 | HCP |
| AVG_precentral_thickavg               | ICC3 | 0.9091 | 21.00 | 34 | 34 | 8.75E-15 | 0.844  | 0.948 | v7.1          | HCP |
| AVG_precuneus_thickavg                | ICC3 | 0.9415 | 33.21 | 34 | 34 | 6.20E-18 | 0.899  | 0.967 | v5.3          | HCP |
| AVG_precuneus_thickavg                | ICC2 | 0.8346 | 14.12 | 34 | 34 | 3.68E-12 | 0.664  | 0.913 | v5.3 vs. v6.0 | HCP |
| AVG_precuneus_thickavg                | ICC2 | 0.8387 | 15.43 | 34 | 34 | 9.83E-13 | 0.641  | 0.919 | v5.3 vs. v7.1 | HCP |
| AVG_precuneus_thickavg                | ICC3 | 0.9275 | 26.60 | 34 | 34 | 2.13E-16 | 0.875  | 0.958 | v6.0          | HCP |
| AVG_precuneus_thickavg                | ICC2 | 0.7785 | 51.49 | 34 | 34 | 5.00E-21 | -0.009 | 0.929 | v6.0 vs. v7.1 | HCP |
| AVG_precuneus_thickavg                | ICC3 | 0.9491 | 38.29 | 34 | 34 | 6.23E-19 | 0.912  | 0.971 | v7.1          | HCP |
| AVG_Putamen                           | ICC3 | 0.9260 | 26.03 | 34 | 34 | 3.02E-16 | 0.873  | 0.958 | v5.3          | HCP |
| AVG_Putamen                           | ICC2 | 0.7012 | 18.76 | 34 | 34 | 5.01E-14 | -0.003 | 0.889 | v5.3 vs. v6.0 | HCP |
| AVG_Putamen                           | ICC2 | 0.7762 | 22.32 | 34 | 34 | 3.39E-15 | 0.091  | 0.918 | v5.3 vs. v7.1 | HCP |
| AVG_Putamen                           | ICC3 | 0.9221 | 24.67 | 34 | 34 | 7.01E-16 | 0.866  | 0.955 | v6.0          | HCP |
| AVG_Putamen                           | ICC2 | 0.9335 | 34.66 | 34 | 34 | 3.11E-18 | 0.868  | 0.964 | v6.0 vs. v7.1 | HCP |
| AVG_Putamen                           | ICC3 | 0.9695 | 64.67 | 34 | 34 | 1.18E-22 | 0.947  | 0.983 | v7.1          | HCP |
| AVG_rostralanteriorcingulate_thickavg | ICC3 | 0.7937 | 8.69  | 34 | 34 | 3.85E-09 | 0.661  | 0.878 | v5.3          | HCP |
| AVG_rostralanteriorcingulate_thickavg | ICC2 | 0.6772 | 8.43  | 34 | 34 | 5.90E-09 | 0.253  | 0.844 | v5.3 vs. v6.0 | HCP |
| AVG_rostralanteriorcingulate_thickavg | ICC2 | 0.6685 | 11.70 | 34 | 34 | 5.86E-11 | 0.055  | 0.861 | v5.3 vs. v7.1 | HCP |
| AVG_rostralanteriorcingulate_thickavg | ICC3 | 0.7899 | 8.52  | 34 | 34 | 5.07E-09 | 0.656  | 0.876 | v6.0          | HCP |
| AVG_rostralanteriorcingulate_thickavg | ICC2 | 0.4465 | 13.12 | 34 | 34 | 1.09E-11 | -0.047 | 0.753 | v6.0 vs. v7.1 | HCP |
| AVG_rostralanteriorcingulate_thickavg | ICC3 | 0.8678 | 14.13 | 34 | 34 | 3.66E-12 | 0.777  | 0.923 | v7.1          | HCP |
| AVG_rostralmiddlefrontal_thickavg     | ICC3 | 0.8575 | 13.03 | 34 | 34 | 1.21E-11 | 0.761  | 0.917 | v5.3          | HCP |
| AVG_rostralmiddlefrontal_thickavg     | ICC2 | 0.8903 | 19.60 | 34 | 34 | 2.55E-14 | 0.800  | 0.939 | v5.3 vs. v6.0 | HCP |
| AVG_rostralmiddlefrontal_thickavg     | ICC2 | 0.6766 | 14.63 | 34 | 34 | 2.17E-12 | 0.008  | 0.873 | v5.3 vs. v7.1 | HCP |
| AVG_rostralmiddlefrontal_thickavg     | ICC3 | 0.8597 | 13.26 | 34 | 34 | 9.40E-12 | 0.764  | 0.918 | v6.0          | HCP |
| AVG_rostralmiddlefrontal_thickavg     | ICC2 | 0.6456 | 32.23 | 34 | 34 | 1.00E-17 | -0.030 | 0.874 | v6.0 vs. v7.1 | HCP |
| AVG_rostralmiddlefrontal_thickavg     | ICC3 | 0.9139 | 22.22 | 34 | 34 | 3.63E-15 | 0.852  | 0.950 | v7.1          | HCP |
| AVG_superiorfrontal_thickavg          | ICC3 | 0.9232 | 25.06 | 34 | 34 | 5.49E-16 | 0.868  | 0.956 | v5.3          | HCP |
| AVG_superiorfrontal_thickavg          | ICC2 | 0.9691 | 74.54 | 34 | 34 | 1.12E-23 | 0.939  | 0.983 | v5.3 vs. v6.0 | HCP |
| AVG_superiorfrontal_thickavg          | ICC2 | 0.8267 | 39.91 | 34 | 34 | 3.19E-19 | 0.066  | 0.943 | v5.3 vs. v7.1 | HCP |
| AVG_superiorfrontal_thickavg          | ICC3 | 0.9310 | 27.98 | 34 | 34 | 9.60E-17 | 0.881  | 0.960 | v6.0          | HCP |
| AVG_superiorfrontal_thickavg          | ICC2 | 0.8834 | 77.89 | 34 | 34 | 5.42E-24 | 0.090  | 0.964 | v6.0 vs. v7.1 | HCP |
| AVG_superiorfrontal_thickavg          | ICC3 | 0.9473 | 36.92 | 34 | 34 | 1.12E-18 | 0.908  | 0.970 | v7.1          | HCP |

|                                 |      |        |          |    |    |          |        |       |               |     |
|---------------------------------|------|--------|----------|----|----|----------|--------|-------|---------------|-----|
| AVG_superiorparietal_thickavg   | ICC3 | 0.9704 | 66.59    | 34 | 34 | 7.26E-23 | 0.948  | 0.983 | v5.3          | HCP |
| AVG_superiorparietal_thickavg   | ICC2 | 0.9133 | 70.52    | 34 | 34 | 2.82E-23 | 0.303  | 0.972 | v5.3 vs. v6.0 | HCP |
| AVG_superiorparietal_thickavg   | ICC2 | 0.9572 | 55.29    | 34 | 34 | 1.56E-21 | 0.912  | 0.978 | v5.3 vs. v7.1 | HCP |
| AVG_superiorparietal_thickavg   | ICC3 | 0.9606 | 49.76    | 34 | 34 | 8.75E-21 | 0.931  | 0.978 | v6.0          | HCP |
| AVG_superiorparietal_thickavg   | ICC2 | 0.8713 | 89.82    | 34 | 34 | 5.07E-25 | 0.044  | 0.962 | v6.0 vs. v7.1 | HCP |
| AVG_superiorparietal_thickavg   | ICC3 | 0.9582 | 46.82    | 34 | 34 | 2.37E-20 | 0.927  | 0.976 | v7.1          | HCP |
| AVG_superiortemporal_thickavg   | ICC3 | 0.9283 | 26.91    | 34 | 34 | 1.78E-16 | 0.876  | 0.959 | v5.3          | HCP |
| AVG_superiortemporal_thickavg   | ICC2 | 0.9417 | 32.92    | 34 | 34 | 7.13E-18 | 0.899  | 0.967 | v5.3 vs. v6.0 | HCP |
| AVG_superiortemporal_thickavg   | ICC2 | 0.7397 | 29.31    | 34 | 34 | 4.57E-17 | -0.011 | 0.910 | v5.3 vs. v7.1 | HCP |
| AVG_superiortemporal_thickavg   | ICC3 | 0.9399 | 32.27    | 34 | 34 | 9.83E-18 | 0.896  | 0.966 | v6.0          | HCP |
| AVG_superiortemporal_thickavg   | ICC2 | 0.7307 | 72.56    | 34 | 34 | 1.76E-23 | -0.012 | 0.914 | v6.0 vs. v7.1 | HCP |
| AVG_superiortemporal_thickavg   | ICC3 | 0.9354 | 29.98    | 34 | 34 | 3.19E-17 | 0.888  | 0.963 | v7.1          | HCP |
| AVG_supramarginal_thickavg      | ICC3 | 0.9339 | 29.27    | 34 | 34 | 4.67E-17 | 0.886  | 0.962 | v5.3          | HCP |
| AVG_supramarginal_thickavg      | ICC2 | 0.9439 | 33.94    | 34 | 34 | 4.36E-18 | 0.903  | 0.968 | v5.3 vs. v6.0 | HCP |
| AVG_supramarginal_thickavg      | ICC2 | 0.7948 | 25.82    | 34 | 34 | 3.43E-16 | 0.096  | 0.927 | v5.3 vs. v7.1 | HCP |
| AVG_supramarginal_thickavg      | ICC3 | 0.9485 | 37.84    | 34 | 34 | 7.56E-19 | 0.911  | 0.971 | v6.0          | HCP |
| AVG_supramarginal_thickavg      | ICC2 | 0.8073 | 61.98    | 34 | 34 | 2.38E-22 | 0.001  | 0.940 | v6.0 vs. v7.1 | HCP |
| AVG_supramarginal_thickavg      | ICC3 | 0.9573 | 45.81    | 34 | 34 | 3.39E-20 | 0.926  | 0.976 | v7.1          | HCP |
| AVG_temporalpole_thickavg       | ICC3 | 0.8067 | 9.35     | 34 | 34 | 1.41E-09 | 0.681  | 0.886 | v5.3          | HCP |
| AVG_temporalpole_thickavg       | ICC2 | 0.8787 | 22.88    | 34 | 34 | 2.29E-15 | 0.676  | 0.943 | v5.3 vs. v6.0 | HCP |
| AVG_temporalpole_thickavg       | ICC2 | 0.6544 | 15.43    | 34 | 34 | 9.81E-13 | -0.021 | 0.866 | v5.3 vs. v7.1 | HCP |
| AVG_temporalpole_thickavg       | ICC3 | 0.9078 | 20.70    | 34 | 34 | 1.09E-14 | 0.842  | 0.947 | v6.0          | HCP |
| AVG_temporalpole_thickavg       | ICC2 | 0.8254 | 30.06    | 34 | 34 | 3.05E-17 | 0.148  | 0.938 | v6.0 vs. v7.1 | HCP |
| AVG_temporalpole_thickavg       | ICC3 | 0.8522 | 12.53    | 34 | 34 | 2.15E-11 | 0.752  | 0.914 | v7.1          | HCP |
| AVG_Thalamus                    | ICC3 | 0.9109 | 21.44    | 34 | 34 | 6.32E-15 | 0.847  | 0.949 | v5.3          | HCP |
| AVG_Thalamus                    | ICC2 | 0.8853 | 23.23    | 34 | 34 | 1.81E-15 | 0.714  | 0.945 | v5.3 vs. v6.0 | HCP |
| AVG_Thalamus                    | ICC2 | 0.8581 | 16.87    | 34 | 34 | 2.54E-13 | 0.701  | 0.926 | v5.3 vs. v7.1 | HCP |
| AVG_Thalamus                    | ICC3 | 0.8809 | 15.80    | 34 | 34 | 6.87E-13 | 0.798  | 0.931 | v6.0          | HCP |
| AVG_Thalamus                    | ICC2 | 0.8925 | 17.17    | 34 | 34 | 1.94E-13 | 0.817  | 0.938 | v6.0 vs. v7.1 | HCP |
| AVG_Thalamus                    | ICC3 | 0.9130 | 21.98    | 34 | 34 | 4.28E-15 | 0.851  | 0.950 | v7.1          | HCP |
| AVG_Thickness                   | ICC3 | 0.9475 | 37.11    | 34 | 34 | 1.04E-18 | 0.909  | 0.970 | v5.3          | HCP |
| AVG_Thickness                   | ICC2 | 0.9580 | 62.54    | 34 | 34 | 2.05E-22 | 0.896  | 0.980 | v5.3 vs. v6.0 | HCP |
| AVG_Thickness                   | ICC2 | 0.7758 | 39.99    | 34 | 34 | 3.09E-19 | -0.003 | 0.927 | v5.3 vs. v7.1 | HCP |
| AVG_Thickness                   | ICC3 | 0.9464 | 36.29    | 34 | 34 | 1.48E-18 | 0.907  | 0.969 | v6.0          | HCP |
| AVG_Thickness                   | ICC2 | 0.7089 | 90.94    | 34 | 34 | 4.13E-25 | -0.009 | 0.907 | v6.0 vs. v7.1 | HCP |
| AVG_Thickness                   | ICC3 | 0.9498 | 38.86    | 34 | 34 | 4.92E-19 | 0.913  | 0.971 | v7.1          | HCP |
| AVG_transversetemporal_thickavg | ICC3 | 0.7531 | 7.10     | 34 | 34 | 5.81E-08 | 0.601  | 0.853 | v5.3          | HCP |
| AVG_transversetemporal_thickavg | ICC2 | 0.8865 | 17.35    | 34 | 34 | 1.66E-13 | 0.807  | 0.934 | v5.3 vs. v6.0 | HCP |
| AVG_transversetemporal_thickavg | ICC2 | 0.7809 | 9.01     | 34 | 34 | 2.35E-09 | 0.630  | 0.873 | v5.3 vs. v7.1 | HCP |
| AVG_transversetemporal_thickavg | ICC3 | 0.9035 | 19.74    | 34 | 34 | 2.29E-14 | 0.835  | 0.944 | v6.0          | HCP |
| AVG_transversetemporal_thickavg | ICC2 | 0.8692 | 28.30    | 34 | 34 | 7.97E-17 | 0.465  | 0.948 | v6.0 vs. v7.1 | HCP |
| AVG_transversetemporal_thickavg | ICC3 | 0.8946 | 17.97    | 34 | 34 | 9.69E-14 | 0.820  | 0.939 | v7.1          | HCP |
| ICV                             | ICC3 | 0.9969 | 644.77   | 34 | 34 | 1.93E-39 | 0.995  | 0.998 | v5.3          | HCP |
| ICV                             | ICC2 | 1.0000 | 1.56E+05 | 34 | 34 | 6.14E-80 | 1.000  | 1.000 | v5.3 vs. v6.0 | HCP |

|                                     |      |        |        |    |    |          |        |       |               |     |
|-------------------------------------|------|--------|--------|----|----|----------|--------|-------|---------------|-----|
| ICV                                 | ICC2 | 0.9569 | 53.62  | 34 | 34 | 2.58E-21 | 0.915  | 0.977 | v5.3 vs. v7.1 | HCP |
| ICV                                 | ICC3 | 0.9963 | 532.38 | 34 | 34 | 4.95E-38 | 0.993  | 0.998 | v6.0          | HCP |
| ICV                                 | ICC2 | 0.9577 | 54.67  | 34 | 34 | 1.87E-21 | 0.916  | 0.977 | v6.0 vs. v7.1 | HCP |
| ICV                                 | ICC3 | 0.9524 | 41.03  | 34 | 34 | 2.03E-19 | 0.917  | 0.973 | v7.1          | HCP |
| LH_Accumbens                        | ICC3 | 0.8025 | 9.13   | 34 | 34 | 1.97E-09 | 0.675  | 0.884 | v5.3          | HCP |
| LH_Accumbens                        | ICC2 | 0.7795 | 8.89   | 34 | 34 | 2.85E-09 | 0.630  | 0.871 | v5.3 vs. v6.0 | HCP |
| LH_Accumbens                        | ICC2 | 0.7612 | 9.06   | 34 | 34 | 2.20E-09 | 0.559  | 0.868 | v5.3 vs. v7.1 | HCP |
| LH_Accumbens                        | ICC3 | 0.7983 | 8.91   | 34 | 34 | 2.74E-09 | 0.668  | 0.881 | v6.0          | HCP |
| LH_Accumbens                        | ICC2 | 0.8086 | 9.37   | 34 | 34 | 1.38E-09 | 0.685  | 0.887 | v6.0 vs. v7.1 | HCP |
| LH_Accumbens                        | ICC3 | 0.8078 | 9.40   | 34 | 34 | 1.30E-09 | 0.683  | 0.887 | v7.1          | HCP |
| LH_Amygdala                         | ICC3 | 0.9330 | 28.84  | 34 | 34 | 5.93E-17 | 0.884  | 0.962 | v5.3          | HCP |
| LH_Amygdala                         | ICC2 | 0.8981 | 38.15  | 34 | 34 | 6.61E-19 | 0.526  | 0.961 | v5.3 vs. v6.0 | HCP |
| LH_Amygdala                         | ICC2 | 0.8528 | 17.88  | 34 | 34 | 1.04E-13 | 0.642  | 0.929 | v5.3 vs. v7.1 | HCP |
| LH_Amygdala                         | ICC3 | 0.9466 | 36.45  | 34 | 34 | 1.38E-18 | 0.907  | 0.970 | v6.0          | HCP |
| LH_Amygdala                         | ICC2 | 0.9493 | 37.49  | 34 | 34 | 8.79E-19 | 0.912  | 0.971 | v6.0 vs. v7.1 | HCP |
| LH_Amygdala                         | ICC3 | 0.9464 | 36.29  | 34 | 34 | 1.48E-18 | 0.907  | 0.969 | v7.1          | HCP |
| LH_bankssts_surfavg                 | ICC3 | 0.9695 | 64.55  | 34 | 34 | 1.21E-22 | 0.947  | 0.983 | v5.3          | HCP |
| LH_bankssts_surfavg                 | ICC2 | 0.7913 | 9.98   | 34 | 34 | 5.70E-10 | 0.631  | 0.882 | v5.3 vs. v6.0 | HCP |
| LH_bankssts_surfavg                 | ICC2 | 0.7646 | 8.19   | 34 | 34 | 8.67E-09 | 0.610  | 0.862 | v5.3 vs. v7.1 | HCP |
| LH_bankssts_surfavg                 | ICC3 | 0.9729 | 72.82  | 34 | 34 | 1.65E-23 | 0.952  | 0.985 | v6.0          | HCP |
| LH_bankssts_surfavg                 | ICC2 | 0.9630 | 52.02  | 34 | 34 | 4.23E-21 | 0.935  | 0.979 | v6.0 vs. v7.1 | HCP |
| LH_bankssts_surfavg                 | ICC3 | 0.9603 | 49.34  | 34 | 34 | 1.01E-20 | 0.931  | 0.977 | v7.1          | HCP |
| LH_bankssts_thickavg                | ICC3 | 0.8585 | 13.14  | 34 | 34 | 1.07E-11 | 0.762  | 0.918 | v5.3          | HCP |
| LH_bankssts_thickavg                | ICC2 | 0.8711 | 14.85  | 34 | 34 | 1.75E-12 | 0.783  | 0.925 | v5.3 vs. v6.0 | HCP |
| LH_bankssts_thickavg                | ICC2 | 0.7669 | 17.17  | 34 | 34 | 1.94E-13 | 0.173  | 0.908 | v5.3 vs. v7.1 | HCP |
| LH_bankssts_thickavg                | ICC3 | 0.8922 | 17.56  | 34 | 34 | 1.38E-13 | 0.817  | 0.938 | v6.0          | HCP |
| LH_bankssts_thickavg                | ICC2 | 0.8359 | 35.78  | 34 | 34 | 1.87E-18 | 0.124  | 0.944 | v6.0 vs. v7.1 | HCP |
| LH_bankssts_thickavg                | ICC3 | 0.9101 | 21.25  | 34 | 34 | 7.27E-15 | 0.846  | 0.948 | v7.1          | HCP |
| LH_caudalanteriorcingulate_surfavg  | ICC3 | 0.9636 | 54.02  | 34 | 34 | 2.28E-21 | 0.936  | 0.979 | v5.3          | HCP |
| LH_caudalanteriorcingulate_surfavg  | ICC2 | 0.8955 | 25.77  | 34 | 34 | 3.52E-16 | 0.733  | 0.950 | v5.3 vs. v6.0 | HCP |
| LH_caudalanteriorcingulate_surfavg  | ICC2 | 0.9100 | 20.76  | 34 | 34 | 1.05E-14 | 0.846  | 0.948 | v5.3 vs. v7.1 | HCP |
| LH_caudalanteriorcingulate_surfavg  | ICC3 | 0.9847 | 129.54 | 34 | 34 | 1.12E-27 | 0.973  | 0.991 | v6.0          | HCP |
| LH_caudalanteriorcingulate_surfavg  | ICC2 | 0.9004 | 23.85  | 34 | 34 | 1.20E-15 | 0.793  | 0.948 | v6.0 vs. v7.1 | HCP |
| LH_caudalanteriorcingulate_surfavg  | ICC3 | 0.9876 | 159.75 | 34 | 34 | 3.32E-29 | 0.978  | 0.993 | v7.1          | HCP |
| LH_caudalanteriorcingulate_thickavg | ICC3 | 0.9057 | 20.21  | 34 | 34 | 1.59E-14 | 0.839  | 0.946 | v5.3          | HCP |
| LH_caudalanteriorcingulate_thickavg | ICC2 | 0.8382 | 11.61  | 34 | 34 | 6.50E-11 | 0.731  | 0.905 | v5.3 vs. v6.0 | HCP |
| LH_caudalanteriorcingulate_thickavg | ICC2 | 0.5351 | 6.70   | 34 | 34 | 1.23E-07 | 0.008  | 0.777 | v5.3 vs. v7.1 | HCP |
| LH_caudalanteriorcingulate_thickavg | ICC3 | 0.8644 | 13.74  | 34 | 34 | 5.51E-12 | 0.772  | 0.921 | v6.0          | HCP |
| LH_caudalanteriorcingulate_thickavg | ICC2 | 0.4678 | 11.02  | 34 | 34 | 1.39E-10 | -0.056 | 0.763 | v6.0 vs. v7.1 | HCP |
| LH_caudalanteriorcingulate_thickavg | ICC3 | 0.9303 | 27.71  | 34 | 34 | 1.12E-16 | 0.880  | 0.960 | v7.1          | HCP |
| LH_caudalmiddlefrontal_surfavg      | ICC3 | 0.9924 | 261.49 | 34 | 34 | 8.26E-33 | 0.987  | 0.996 | v5.3          | HCP |
| LH_caudalmiddlefrontal_surfavg      | ICC2 | 0.9409 | 34.02  | 34 | 34 | 4.20E-18 | 0.897  | 0.966 | v5.3 vs. v6.0 | HCP |
| LH_caudalmiddlefrontal_surfavg      | ICC2 | 0.9355 | 30.96  | 34 | 34 | 1.91E-17 | 0.888  | 0.963 | v5.3 vs. v7.1 | HCP |
| LH_caudalmiddlefrontal_surfavg      | ICC3 | 0.9862 | 143.86 | 34 | 34 | 1.93E-28 | 0.976  | 0.992 | v6.0          | HCP |

|                                 |      |        |        |    |    |          |        |       |               |     |
|---------------------------------|------|--------|--------|----|----|----------|--------|-------|---------------|-----|
| LH_caudalmiddlefrontal_surfavg  | ICC2 | 0.9888 | 172.59 | 34 | 34 | 9.06E-30 | 0.980  | 0.994 | v6.0 vs. v7.1 | HCP |
| LH_caudalmiddlefrontal_surfavg  | ICC3 | 0.9929 | 281.22 | 34 | 34 | 2.42E-33 | 0.987  | 0.996 | v7.1          | HCP |
| LH_caudalmiddlefrontal_thickavg | ICC3 | 0.8757 | 15.10  | 34 | 34 | 1.36E-12 | 0.790  | 0.928 | v5.3          | HCP |
| LH_caudalmiddlefrontal_thickavg | ICC2 | 0.9189 | 27.57  | 34 | 34 | 1.21E-16 | 0.845  | 0.956 | v5.3 vs. v6.0 | HCP |
| LH_caudalmiddlefrontal_thickavg | ICC2 | 0.8456 | 22.23  | 34 | 34 | 3.61E-15 | 0.450  | 0.936 | v5.3 vs. v7.1 | HCP |
| LH_caudalmiddlefrontal_thickavg | ICC3 | 0.8816 | 15.90  | 34 | 34 | 6.24E-13 | 0.799  | 0.931 | v6.0          | HCP |
| LH_caudalmiddlefrontal_thickavg | ICC2 | 0.7844 | 28.15  | 34 | 34 | 8.72E-17 | 0.047  | 0.925 | v6.0 vs. v7.1 | HCP |
| LH_caudalmiddlefrontal_thickavg | ICC3 | 0.9325 | 28.64  | 34 | 34 | 6.60E-17 | 0.883  | 0.961 | v7.1          | HCP |
| LH_Caudate                      | ICC3 | 0.9802 | 100.02 | 34 | 34 | 8.44E-26 | 0.965  | 0.989 | v5.3          | HCP |
| LH_Caudate                      | ICC2 | 0.8224 | 67.66  | 34 | 34 | 5.58E-23 | 0.008  | 0.946 | v5.3 vs. v6.0 | HCP |
| LH_Caudate                      | ICC2 | 0.8394 | 52.79  | 34 | 34 | 3.32E-21 | 0.045  | 0.949 | v5.3 vs. v7.1 | HCP |
| LH_Caudate                      | ICC3 | 0.9782 | 90.81  | 34 | 34 | 4.23E-25 | 0.962  | 0.988 | v6.0          | HCP |
| LH_Caudate                      | ICC2 | 0.9792 | 105.43 | 34 | 34 | 3.51E-26 | 0.961  | 0.989 | v6.0 vs. v7.1 | HCP |
| LH_Caudate                      | ICC3 | 0.9701 | 65.79  | 34 | 34 | 8.87E-23 | 0.948  | 0.983 | v7.1          | HCP |
| LH_cuneus_surfavg               | ICC3 | 0.9189 | 23.65  | 34 | 34 | 1.36E-15 | 0.861  | 0.953 | v5.3          | HCP |
| LH_cuneus_surfavg               | ICC2 | 0.6370 | 5.74   | 34 | 34 | 8.56E-07 | 0.359  | 0.795 | v5.3 vs. v6.0 | HCP |
| LH_cuneus_surfavg               | ICC2 | 0.6582 | 7.48   | 34 | 34 | 2.92E-08 | 0.262  | 0.828 | v5.3 vs. v7.1 | HCP |
| LH_cuneus_surfavg               | ICC3 | 0.9822 | 111.13 | 34 | 34 | 1.45E-26 | 0.969  | 0.990 | v6.0          | HCP |
| LH_cuneus_surfavg               | ICC2 | 0.9763 | 101.99 | 34 | 34 | 6.10E-26 | 0.950  | 0.988 | v6.0 vs. v7.1 | HCP |
| LH_cuneus_surfavg               | ICC3 | 0.9839 | 123.14 | 34 | 34 | 2.61E-27 | 0.972  | 0.991 | v7.1          | HCP |
| LH_cuneus_thickavg              | ICC3 | 0.9359 | 30.19  | 34 | 34 | 2.86E-17 | 0.889  | 0.963 | v5.3          | HCP |
| LH_cuneus_thickavg              | ICC2 | 0.8312 | 17.72  | 34 | 34 | 1.20E-13 | 0.509  | 0.925 | v5.3 vs. v6.0 | HCP |
| LH_cuneus_thickavg              | ICC2 | 0.8628 | 13.30  | 34 | 34 | 8.93E-12 | 0.769  | 0.920 | v5.3 vs. v7.1 | HCP |
| LH_cuneus_thickavg              | ICC3 | 0.9461 | 36.08  | 34 | 34 | 1.63E-18 | 0.906  | 0.969 | v6.0          | HCP |
| LH_cuneus_thickavg              | ICC2 | 0.9010 | 43.73  | 34 | 34 | 7.21E-20 | 0.465  | 0.964 | v6.0 vs. v7.1 | HCP |
| LH_cuneus_thickavg              | ICC3 | 0.9516 | 40.35  | 34 | 34 | 2.67E-19 | 0.916  | 0.972 | v7.1          | HCP |
| LH_entorhinal_surfavg           | ICC3 | 0.8816 | 15.89  | 34 | 34 | 6.25E-13 | 0.799  | 0.931 | v5.3          | HCP |
| LH_entorhinal_surfavg           | ICC2 | 0.7476 | 7.93   | 34 | 34 | 1.35E-08 | 0.570  | 0.854 | v5.3 vs. v6.0 | HCP |
| LH_entorhinal_surfavg           | ICC2 | 0.6946 | 5.44   | 34 | 34 | 1.67E-06 | 0.515  | 0.816 | v5.3 vs. v7.1 | HCP |
| LH_entorhinal_surfavg           | ICC3 | 0.8818 | 15.92  | 34 | 34 | 6.12E-13 | 0.800  | 0.932 | v6.0          | HCP |
| LH_entorhinal_surfavg           | ICC2 | 0.8380 | 14.54  | 34 | 34 | 2.38E-12 | 0.667  | 0.915 | v6.0 vs. v7.1 | HCP |
| LH_entorhinal_surfavg           | ICC3 | 0.8442 | 11.84  | 34 | 34 | 4.94E-11 | 0.740  | 0.909 | v7.1          | HCP |
| LH_entorhinal_thickavg          | ICC3 | 0.7745 | 7.87   | 34 | 34 | 1.49E-08 | 0.632  | 0.866 | v5.3          | HCP |
| LH_entorhinal_thickavg          | ICC2 | 0.8830 | 15.67  | 34 | 34 | 7.77E-13 | 0.801  | 0.932 | v5.3 vs. v6.0 | HCP |
| LH_entorhinal_thickavg          | ICC2 | 0.6578 | 9.82   | 34 | 34 | 7.07E-10 | 0.101  | 0.849 | v5.3 vs. v7.1 | HCP |
| LH_entorhinal_thickavg          | ICC3 | 0.8329 | 10.97  | 34 | 34 | 1.48E-10 | 0.722  | 0.902 | v6.0          | HCP |
| LH_entorhinal_thickavg          | ICC2 | 0.6749 | 15.76  | 34 | 34 | 7.14E-13 | -0.006 | 0.874 | v6.0 vs. v7.1 | HCP |
| LH_entorhinal_thickavg          | ICC3 | 0.8222 | 10.25  | 34 | 34 | 3.90E-10 | 0.705  | 0.896 | v7.1          | HCP |
| LH_frontalpole_surfavg          | ICC3 | 0.5983 | 3.98   | 34 | 34 | 5.82E-05 | 0.384  | 0.752 | v5.3          | HCP |
| LH_frontalpole_surfavg          | ICC2 | 0.1703 | 3.00   | 34 | 34 | 9.48E-04 | -0.062 | 0.429 | v5.3 vs. v6.0 | HCP |
| LH_frontalpole_surfavg          | ICC2 | 0.1152 | 2.89   | 34 | 34 | 1.31E-03 | -0.047 | 0.334 | v5.3 vs. v7.1 | HCP |
| LH_frontalpole_surfavg          | ICC3 | 0.8467 | 12.05  | 34 | 34 | 3.82E-11 | 0.744  | 0.911 | v6.0          | HCP |
| LH_frontalpole_surfavg          | ICC2 | 0.7689 | 14.83  | 34 | 34 | 1.77E-12 | 0.269  | 0.903 | v6.0 vs. v7.1 | HCP |
| LH_frontalpole_surfavg          | ICC3 | 0.9203 | 24.10  | 34 | 34 | 1.01E-15 | 0.863  | 0.954 | v7.1          | HCP |



|                              |      |        |        |    |    |          |        |       |               |     |
|------------------------------|------|--------|--------|----|----|----------|--------|-------|---------------|-----|
| LH_frontalpole_thickavg      | ICC3 | 0.7974 | 8.87   | 34 | 34 | 2.92E-09 | 0.667  | 0.880 | v5.3          | HCP |
| LH_frontalpole_thickavg      | ICC2 | 0.7199 | 7.60   | 34 | 34 | 2.37E-08 | 0.492  | 0.844 | v5.3 vs. v6.0 | HCP |
| LH_frontalpole_thickavg      | ICC2 | 0.6665 | 11.11  | 34 | 34 | 1.23E-10 | 0.070  | 0.858 | v5.3 vs. v7.1 | HCP |
| LH_frontalpole_thickavg      | ICC3 | 0.8258 | 10.48  | 34 | 34 | 2.83E-10 | 0.711  | 0.898 | v6.0          | HCP |
| LH_frontalpole_thickavg      | ICC2 | 0.8365 | 17.62  | 34 | 34 | 1.31E-13 | 0.547  | 0.925 | v6.0 vs. v7.1 | HCP |
| LH_frontalpole_thickavg      | ICC3 | 0.8731 | 14.76  | 34 | 34 | 1.91E-12 | 0.786  | 0.926 | v7.1          | HCP |
| LH_fusiform_surfvag          | ICC3 | 0.9639 | 54.41  | 34 | 34 | 2.03E-21 | 0.937  | 0.979 | v5.3          | HCP |
| LH_fusiform_surfvag          | ICC2 | 0.8378 | 16.52  | 34 | 34 | 3.48E-13 | 0.597  | 0.922 | v5.3 vs. v6.0 | HCP |
| LH_fusiform_surfvag          | ICC2 | 0.8712 | 17.53  | 34 | 34 | 1.41E-13 | 0.750  | 0.930 | v5.3 vs. v7.1 | HCP |
| LH_fusiform_surfvag          | ICC3 | 0.9829 | 116.05 | 34 | 34 | 7.05E-27 | 0.970  | 0.990 | v6.0          | HCP |
| LH_fusiform_surfvag          | ICC2 | 0.9807 | 153.62 | 34 | 34 | 6.41E-29 | 0.939  | 0.991 | v6.0 vs. v7.1 | HCP |
| LH_fusiform_surfvag          | ICC3 | 0.9882 | 168.43 | 34 | 34 | 1.37E-29 | 0.979  | 0.993 | v7.1          | HCP |
| LH_fusiform_thickavg         | ICC3 | 0.8694 | 14.32  | 34 | 34 | 3.00E-12 | 0.780  | 0.924 | v5.3          | HCP |
| LH_fusiform_thickavg         | ICC2 | 0.8987 | 18.55  | 34 | 34 | 5.93E-14 | 0.828  | 0.941 | v5.3 vs. v6.0 | HCP |
| LH_fusiform_thickavg         | ICC2 | 0.7071 | 13.44  | 34 | 34 | 7.69E-12 | 0.093  | 0.880 | v5.3 vs. v7.1 | HCP |
| LH_fusiform_thickavg         | ICC3 | 0.8759 | 15.11  | 34 | 34 | 1.34E-12 | 0.790  | 0.928 | v6.0          | HCP |
| LH_fusiform_thickavg         | ICC2 | 0.7054 | 32.11  | 34 | 34 | 1.06E-17 | -0.026 | 0.899 | v6.0 vs. v7.1 | HCP |
| LH_fusiform_thickavg         | ICC3 | 0.9081 | 20.76  | 34 | 34 | 1.05E-14 | 0.843  | 0.947 | v7.1          | HCP |
| LH_Hippocampus               | ICC3 | 0.9648 | 55.82  | 34 | 34 | 1.33E-21 | 0.938  | 0.980 | v5.3          | HCP |
| LH_Hippocampus               | ICC2 | 0.9427 | 52.09  | 34 | 34 | 4.14E-21 | 0.821  | 0.975 | v5.3 vs. v6.0 | HCP |
| LH_Hippocampus               | ICC2 | 0.9573 | 48.28  | 34 | 34 | 1.44E-20 | 0.925  | 0.976 | v5.3 vs. v7.1 | HCP |
| LH_Hippocampus               | ICC3 | 0.9597 | 48.57  | 34 | 34 | 1.30E-20 | 0.930  | 0.977 | v6.0          | HCP |
| LH_Hippocampus               | ICC2 | 0.9578 | 56.57  | 34 | 34 | 1.07E-21 | 0.912  | 0.978 | v6.0 vs. v7.1 | HCP |
| LH_Hippocampus               | ICC3 | 0.9694 | 64.45  | 34 | 34 | 1.25E-22 | 0.946  | 0.983 | v7.1          | HCP |
| LH_inferiorparietal_surfvag  | ICC3 | 0.9907 | 214.81 | 34 | 34 | 2.28E-31 | 0.984  | 0.995 | v5.3          | HCP |
| LH_inferiorparietal_surfvag  | ICC2 | 0.8476 | 17.46  | 34 | 34 | 1.51E-13 | 0.624  | 0.927 | v5.3 vs. v6.0 | HCP |
| LH_inferiorparietal_surfvag  | ICC2 | 0.8713 | 19.77  | 34 | 34 | 2.23E-14 | 0.703  | 0.936 | v5.3 vs. v7.1 | HCP |
| LH_inferiorparietal_surfvag  | ICC3 | 0.9865 | 147.40 | 34 | 34 | 1.28E-28 | 0.976  | 0.992 | v6.0          | HCP |
| LH_inferiorparietal_surfvag  | ICC2 | 0.9817 | 111.25 | 34 | 34 | 1.43E-26 | 0.968  | 0.990 | v6.0 vs. v7.1 | HCP |
| LH_inferiorparietal_surfvag  | ICC3 | 0.9955 | 443.65 | 34 | 34 | 1.09E-36 | 0.992  | 0.997 | v7.1          | HCP |
| LH_inferiorparietal_thickavg | ICC3 | 0.9467 | 36.55  | 34 | 34 | 1.32E-18 | 0.908  | 0.970 | v5.3          | HCP |
| LH_inferiorparietal_thickavg | ICC2 | 0.9363 | 33.42  | 34 | 34 | 5.60E-18 | 0.885  | 0.964 | v5.3 vs. v6.0 | HCP |
| LH_inferiorparietal_thickavg | ICC2 | 0.7952 | 23.33  | 34 | 34 | 1.69E-15 | 0.136  | 0.925 | v5.3 vs. v7.1 | HCP |
| LH_inferiorparietal_thickavg | ICC3 | 0.9157 | 22.72  | 34 | 34 | 2.55E-15 | 0.855  | 0.952 | v6.0          | HCP |
| LH_inferiorparietal_thickavg | ICC2 | 0.7541 | 52.73  | 34 | 34 | 3.39E-21 | -0.015 | 0.921 | v6.0 vs. v7.1 | HCP |
| LH_inferiorparietal_thickavg | ICC3 | 0.9539 | 42.35  | 34 | 34 | 1.22E-19 | 0.920  | 0.974 | v7.1          | HCP |
| LH_inferiortemporal_surfvag  | ICC3 | 0.9877 | 161.42 | 34 | 34 | 2.79E-29 | 0.978  | 0.993 | v5.3          | HCP |
| LH_inferiortemporal_surfvag  | ICC2 | 0.9172 | 29.74  | 34 | 34 | 3.63E-17 | 0.818  | 0.958 | v5.3 vs. v6.0 | HCP |
| LH_inferiortemporal_surfvag  | ICC2 | 0.8923 | 32.64  | 34 | 34 | 8.16E-18 | 0.574  | 0.957 | v5.3 vs. v7.1 | HCP |
| LH_inferiortemporal_surfvag  | ICC3 | 0.9915 | 234.69 | 34 | 34 | 5.12E-32 | 0.985  | 0.995 | v6.0          | HCP |
| LH_inferiortemporal_surfvag  | ICC2 | 0.9859 | 303.68 | 34 | 34 | 6.61E-34 | 0.900  | 0.995 | v6.0 vs. v7.1 | HCP |
| LH_inferiortemporal_surfvag  | ICC3 | 0.9935 | 304.96 | 34 | 34 | 6.15E-34 | 0.988  | 0.996 | v7.1          | HCP |
| LH_inferiortemporal_thickavg | ICC3 | 0.8718 | 14.60  | 34 | 34 | 2.23E-12 | 0.784  | 0.926 | v5.3          | HCP |
| LH_inferiortemporal_thickavg | ICC2 | 0.9281 | 33.04  | 34 | 34 | 6.71E-18 | 0.851  | 0.962 | v5.3 vs. v6.0 | HCP |

|                                 |      |        |        |    |    |          |        |       |               |     |
|---------------------------------|------|--------|--------|----|----|----------|--------|-------|---------------|-----|
| LH_inferiortemporal_thickavg    | ICC2 | 0.6330 | 20.90  | 34 | 34 | 9.37E-15 | -0.039 | 0.863 | v5.3 vs. v7.1 | HCP |
| LH_inferiortemporal_thickavg    | ICC3 | 0.8879 | 16.84  | 34 | 34 | 2.61E-13 | 0.810  | 0.935 | v6.0          | HCP |
| LH_inferiortemporal_thickavg    | ICC2 | 0.7153 | 34.96  | 34 | 34 | 2.71E-18 | -0.024 | 0.904 | v6.0 vs. v7.1 | HCP |
| LH_inferiortemporal_thickavg    | ICC3 | 0.9277 | 26.68  | 34 | 34 | 2.04E-16 | 0.875  | 0.959 | v7.1          | HCP |
| LH_insula_surfavg               | ICC3 | 0.9505 | 39.40  | 34 | 34 | 3.93E-19 | 0.914  | 0.972 | v5.3          | HCP |
| LH_insula_surfavg               | ICC2 | 0.7425 | 16.60  | 34 | 34 | 3.24E-13 | 0.105  | 0.899 | v5.3 vs. v6.0 | HCP |
| LH_insula_surfavg               | ICC2 | 0.7688 | 20.08  | 34 | 34 | 1.74E-14 | 0.108  | 0.913 | v5.3 vs. v7.1 | HCP |
| LH_insula_surfavg               | ICC3 | 0.8680 | 14.15  | 34 | 34 | 3.56E-12 | 0.777  | 0.923 | v6.0          | HCP |
| LH_insula_surfavg               | ICC2 | 0.8804 | 15.40  | 34 | 34 | 1.01E-12 | 0.798  | 0.931 | v6.0 vs. v7.1 | HCP |
| LH_insula_surfavg               | ICC3 | 0.8562 | 12.91  | 34 | 34 | 1.38E-11 | 0.759  | 0.916 | v7.1          | HCP |
| LH_insula_thickavg              | ICC3 | 0.8490 | 12.24  | 34 | 34 | 3.02E-11 | 0.747  | 0.912 | v5.3          | HCP |
| LH_insula_thickavg              | ICC2 | 0.8242 | 10.52  | 34 | 34 | 2.69E-10 | 0.710  | 0.897 | v5.3 vs. v6.0 | HCP |
| LH_insula_thickavg              | ICC2 | 0.6739 | 10.59  | 34 | 34 | 2.44E-10 | 0.109  | 0.858 | v5.3 vs. v7.1 | HCP |
| LH_insula_thickavg              | ICC3 | 0.7360 | 6.58   | 34 | 34 | 1.56E-07 | 0.575  | 0.842 | v6.0          | HCP |
| LH_insula_thickavg              | ICC2 | 0.5911 | 8.39   | 34 | 34 | 6.27E-09 | 0.024  | 0.815 | v6.0 vs. v7.1 | HCP |
| LH_insula_thickavg              | ICC3 | 0.8077 | 9.40   | 34 | 34 | 1.31E-09 | 0.683  | 0.887 | v7.1          | HCP |
| LH_isthmuscingulate_surfavg     | ICC3 | 0.8458 | 11.97  | 34 | 34 | 4.20E-11 | 0.742  | 0.910 | v5.3          | HCP |
| LH_isthmuscingulate_surfavg     | ICC2 | 0.8532 | 12.45  | 34 | 34 | 2.35E-11 | 0.754  | 0.914 | v5.3 vs. v6.0 | HCP |
| LH_isthmuscingulate_surfavg     | ICC2 | 0.7952 | 8.57   | 34 | 34 | 4.72E-09 | 0.663  | 0.879 | v5.3 vs. v7.1 | HCP |
| LH_isthmuscingulate_surfavg     | ICC3 | 0.9744 | 76.99  | 34 | 34 | 6.58E-24 | 0.955  | 0.985 | v6.0          | HCP |
| LH_isthmuscingulate_surfavg     | ICC2 | 0.9485 | 37.09  | 34 | 34 | 1.04E-18 | 0.911  | 0.971 | v6.0 vs. v7.1 | HCP |
| LH_isthmuscingulate_surfavg     | ICC3 | 0.9779 | 89.45  | 34 | 34 | 5.43E-25 | 0.961  | 0.987 | v7.1          | HCP |
| LH_isthmuscingulate_thickavg    | ICC3 | 0.7978 | 8.89   | 34 | 34 | 2.84E-09 | 0.668  | 0.881 | v5.3          | HCP |
| LH_isthmuscingulate_thickavg    | ICC2 | 0.5328 | 6.60   | 34 | 34 | 1.49E-07 | 0.009  | 0.775 | v5.3 vs. v6.0 | HCP |
| LH_isthmuscingulate_thickavg    | ICC2 | 0.2615 | 6.17   | 34 | 34 | 3.53E-07 | -0.052 | 0.573 | v5.3 vs. v7.1 | HCP |
| LH_isthmuscingulate_thickavg    | ICC3 | 0.8591 | 13.19  | 34 | 34 | 1.01E-11 | 0.763  | 0.918 | v6.0          | HCP |
| LH_isthmuscingulate_thickavg    | ICC2 | 0.4735 | 6.40   | 34 | 34 | 2.21E-07 | -0.043 | 0.744 | v6.0 vs. v7.1 | HCP |
| LH_isthmuscingulate_thickavg    | ICC3 | 0.8090 | 9.47   | 34 | 34 | 1.18E-09 | 0.685  | 0.888 | v7.1          | HCP |
| LH_lateraloccipital_surfavg     | ICC3 | 0.9818 | 108.76 | 34 | 34 | 2.09E-26 | 0.968  | 0.990 | v5.3          | HCP |
| LH_lateraloccipital_surfavg     | ICC2 | 0.7443 | 13.98  | 34 | 34 | 4.26E-12 | 0.197  | 0.893 | v5.3 vs. v6.0 | HCP |
| LH_lateraloccipital_surfavg     | ICC2 | 0.7116 | 13.20  | 34 | 34 | 9.98E-12 | 0.113  | 0.881 | v5.3 vs. v7.1 | HCP |
| LH_lateraloccipital_surfavg     | ICC3 | 0.9883 | 169.31 | 34 | 34 | 1.25E-29 | 0.979  | 0.993 | v6.0          | HCP |
| LH_lateraloccipital_surfavg     | ICC2 | 0.9860 | 155.40 | 34 | 34 | 5.29E-29 | 0.974  | 0.992 | v6.0 vs. v7.1 | HCP |
| LH_lateraloccipital_surfavg     | ICC3 | 0.9943 | 349.67 | 34 | 34 | 6.09E-35 | 0.990  | 0.997 | v7.1          | HCP |
| LH_lateraloccipital_thickavg    | ICC3 | 0.9589 | 47.72  | 34 | 34 | 1.74E-20 | 0.928  | 0.977 | v5.3          | HCP |
| LH_lateraloccipital_thickavg    | ICC2 | 0.9399 | 31.67  | 34 | 34 | 1.33E-17 | 0.896  | 0.966 | v5.3 vs. v6.0 | HCP |
| LH_lateraloccipital_thickavg    | ICC2 | 0.8509 | 25.37  | 34 | 34 | 4.53E-16 | 0.397  | 0.941 | v5.3 vs. v7.1 | HCP |
| LH_lateraloccipital_thickavg    | ICC3 | 0.9460 | 36.01  | 34 | 34 | 1.68E-18 | 0.906  | 0.969 | v6.0          | HCP |
| LH_lateraloccipital_thickavg    | ICC2 | 0.8663 | 67.13  | 34 | 34 | 6.36E-23 | 0.068  | 0.959 | v6.0 vs. v7.1 | HCP |
| LH_lateraloccipital_thickavg    | ICC3 | 0.9617 | 51.16  | 34 | 34 | 5.56E-21 | 0.933  | 0.978 | v7.1          | HCP |
| LH_lateralorbitofrontal_surfavg | ICC3 | 0.9800 | 99.01  | 34 | 34 | 1.00E-25 | 0.965  | 0.989 | v5.3          | HCP |
| LH_lateralorbitofrontal_surfavg | ICC2 | 0.9646 | 62.02  | 34 | 34 | 2.35E-22 | 0.934  | 0.980 | v5.3 vs. v6.0 | HCP |
| LH_lateralorbitofrontal_surfavg | ICC2 | 0.9184 | 50.53  | 34 | 34 | 6.83E-21 | 0.565  | 0.970 | v5.3 vs. v7.1 | HCP |
| LH_lateralorbitofrontal_surfavg | ICC3 | 0.9786 | 92.40  | 34 | 34 | 3.17E-25 | 0.962  | 0.988 | v6.0          | HCP |

|                                  |      |        |         |    |    |          |        |       |               |     |
|----------------------------------|------|--------|---------|----|----|----------|--------|-------|---------------|-----|
| LH_lateralorbitofrontal_surfvag  | ICC2 | 0.9603 | 112.10  | 34 | 34 | 1.26E-26 | 0.725  | 0.986 | v6.0 vs. v7.1 | HCP |
| LH_lateralorbitofrontal_surfvag  | ICC3 | 0.9829 | 115.87  | 34 | 34 | 7.24E-27 | 0.970  | 0.990 | v7.1          | HCP |
| LH_lateralorbitofrontal_thickavg | ICC3 | 0.8666 | 13.99   | 34 | 34 | 4.22E-12 | 0.775  | 0.922 | v5.3          | HCP |
| LH_lateralorbitofrontal_thickavg | ICC2 | 0.8748 | 16.84   | 34 | 34 | 2.61E-13 | 0.776  | 0.929 | v5.3 vs. v6.0 | HCP |
| LH_lateralorbitofrontal_thickavg | ICC2 | 0.7684 | 13.52   | 34 | 34 | 7.00E-12 | 0.330  | 0.898 | v5.3 vs. v7.1 | HCP |
| LH_lateralorbitofrontal_thickavg | ICC3 | 0.8789 | 15.51   | 34 | 34 | 9.06E-13 | 0.795  | 0.930 | v6.0          | HCP |
| LH_lateralorbitofrontal_thickavg | ICC2 | 0.7315 | 30.51   | 34 | 34 | 2.41E-17 | -0.017 | 0.908 | v6.0 vs. v7.1 | HCP |
| LH_lateralorbitofrontal_thickavg | ICC3 | 0.8763 | 15.16   | 34 | 34 | 1.27E-12 | 0.791  | 0.928 | v7.1          | HCP |
| LH_LateralVentricle              | ICC3 | 0.9959 | 489.13  | 34 | 34 | 2.08E-37 | 0.993  | 0.998 | v5.3          | HCP |
| LH_LateralVentricle              | ICC2 | 0.9785 | 540.29  | 34 | 34 | 3.86E-38 | 0.441  | 0.994 | v5.3 vs. v6.0 | HCP |
| LH_LateraVentricle               | ICC2 | 0.9755 | 446.94  | 34 | 34 | 9.58E-37 | 0.426  | 0.993 | v5.3 vs. v7.1 | HCP |
| LH_LateraVentricle               | ICC3 | 0.9963 | 538.86  | 34 | 34 | 4.04E-38 | 0.993  | 0.998 | v6.0          | HCP |
| LH_LateraVentricle               | ICC2 | 0.9993 | 3316.57 | 34 | 34 | 1.63E-51 | 0.999  | 1.000 | v6.0 vs. v7.1 | HCP |
| LH_LateraVentricle               | ICC3 | 0.9967 | 602.66  | 34 | 34 | 6.06E-39 | 0.994  | 0.998 | v7.1          | HCP |
| LH_lingual_surfvag               | ICC3 | 0.9794 | 95.95   | 34 | 34 | 1.69E-25 | 0.964  | 0.988 | v5.3          | HCP |
| LH_lingual_surfvag               | ICC2 | 0.8818 | 15.53   | 34 | 34 | 8.89E-13 | 0.800  | 0.932 | v5.3 vs. v6.0 | HCP |
| LH_lingual_surfvag               | ICC2 | 0.8647 | 14.91   | 34 | 34 | 1.64E-12 | 0.767  | 0.922 | v5.3 vs. v7.1 | HCP |
| LH_lingual_surfvag               | ICC3 | 0.9872 | 155.41  | 34 | 34 | 5.28E-29 | 0.977  | 0.993 | v6.0          | HCP |
| LH_lingual_surfvag               | ICC2 | 0.9783 | 166.01  | 34 | 34 | 1.74E-29 | 0.896  | 0.991 | v6.0 vs. v7.1 | HCP |
| LH_lingual_surfvag               | ICC3 | 0.9910 | 222.22  | 34 | 34 | 1.29E-31 | 0.984  | 0.995 | v7.1          | HCP |
| LH_lingual_thickavg              | ICC3 | 0.9271 | 26.43   | 34 | 34 | 2.37E-16 | 0.874  | 0.958 | v5.3          | HCP |
| LH_lingual_thickavg              | ICC2 | 0.8732 | 24.38   | 34 | 34 | 8.46E-16 | 0.598  | 0.945 | v5.3 vs. v6.0 | HCP |
| LH_lingual_thickavg              | ICC2 | 0.8566 | 18.73   | 34 | 34 | 5.11E-14 | 0.640  | 0.931 | v5.3 vs. v7.1 | HCP |
| LH_lingual_thickavg              | ICC3 | 0.8748 | 14.97   | 34 | 34 | 1.54E-12 | 0.788  | 0.927 | v6.0          | HCP |
| LH_lingual_thickavg              | ICC2 | 0.7832 | 45.32   | 34 | 34 | 4.03E-20 | -0.004 | 0.930 | v6.0 vs. v7.1 | HCP |
| LH_lingual_thickavg              | ICC3 | 0.9093 | 21.06   | 34 | 34 | 8.34E-15 | 0.845  | 0.948 | v7.1          | HCP |
| LH_medialorbitofrontal_surfvag   | ICC3 | 0.9322 | 28.52   | 34 | 34 | 7.07E-17 | 0.883  | 0.961 | v5.3          | HCP |
| LH_medialorbitofrontal_surfvag   | ICC2 | 0.8467 | 12.07   | 34 | 34 | 3.71E-11 | 0.745  | 0.910 | v5.3 vs. v6.0 | HCP |
| LH_medialorbitofrontal_surfvag   | ICC2 | 0.7615 | 10.25   | 34 | 34 | 3.88E-10 | 0.488  | 0.878 | v5.3 vs. v7.1 | HCP |
| LH_medialorbitofrontal_surfvag   | ICC3 | 0.8434 | 11.77   | 34 | 34 | 5.36E-11 | 0.738  | 0.908 | v6.0          | HCP |
| LH_medialorbitofrontal_surfvag   | ICC2 | 0.7930 | 10.61   | 34 | 34 | 2.39E-10 | 0.611  | 0.886 | v6.0 vs. v7.1 | HCP |
| LH_medialorbitofrontal_surfvag   | ICC3 | 0.8648 | 13.79   | 34 | 34 | 5.25E-12 | 0.772  | 0.921 | v7.1          | HCP |
| LH_medialorbitofrontal_thickavg  | ICC3 | 0.7372 | 6.61    | 34 | 34 | 1.46E-07 | 0.577  | 0.843 | v5.3          | HCP |
| LH_medialorbitofrontal_thickavg  | ICC2 | 0.8578 | 13.52   | 34 | 34 | 7.07E-12 | 0.762  | 0.917 | v5.3 vs. v6.0 | HCP |
| LH_medialorbitofrontal_thickavg  | ICC2 | 0.7289 | 12.49   | 34 | 34 | 2.27E-11 | 0.203  | 0.884 | v5.3 vs. v7.1 | HCP |
| LH_medialorbitofrontal_thickavg  | ICC3 | 0.8655 | 13.87   | 34 | 34 | 4.83E-12 | 0.773  | 0.922 | v6.0          | HCP |
| LH_medialorbitofrontal_thickavg  | ICC2 | 0.6694 | 15.99   | 34 | 34 | 5.73E-13 | -0.013 | 0.873 | v6.0 vs. v7.1 | HCP |
| LH_medialorbitofrontal_thickavg  | ICC3 | 0.8234 | 10.33   | 34 | 34 | 3.50E-10 | 0.707  | 0.896 | v7.1          | HCP |
| LH_middletemporal_surfvag        | ICC3 | 0.9888 | 177.20  | 34 | 34 | 5.82E-30 | 0.980  | 0.994 | v5.3          | HCP |
| LH_middletemporal_surfvag        | ICC2 | 0.9150 | 40.86   | 34 | 34 | 2.18E-19 | 0.658  | 0.966 | v5.3 vs. v6.0 | HCP |
| LH_middletemporal_surfvag        | ICC2 | 0.8647 | 36.22   | 34 | 34 | 1.53E-18 | 0.269  | 0.952 | v5.3 vs. v7.1 | HCP |
| LH_middletemporal_surfvag        | ICC3 | 0.9923 | 257.81  | 34 | 34 | 1.05E-32 | 0.986  | 0.996 | v6.0          | HCP |
| LH_middletemporal_surfvag        | ICC2 | 0.9812 | 221.99  | 34 | 34 | 1.31E-31 | 0.876  | 0.993 | v6.0 vs. v7.1 | HCP |
| LH_middletemporal_surfvag        | ICC3 | 0.9952 | 419.43  | 34 | 34 | 2.81E-36 | 0.992  | 0.997 | v7.1          | HCP |

|                             |      |        |        |    |    |          |        |       |               |     |
|-----------------------------|------|--------|--------|----|----|----------|--------|-------|---------------|-----|
| LH_middletemporal_thickavg  | ICC3 | 0.9181 | 23.41  | 34 | 34 | 1.60E-15 | 0.859  | 0.953 | v5.3          | HCP |
| LH_middletemporal_thickavg  | ICC2 | 0.9031 | 39.56  | 34 | 34 | 3.68E-19 | 0.554  | 0.963 | v5.3 vs. v6.0 | HCP |
| LH_middletemporal_thickavg  | ICC2 | 0.6058 | 29.55  | 34 | 34 | 4.02E-17 | -0.031 | 0.855 | v5.3 vs. v7.1 | HCP |
| LH_middletemporal_thickavg  | ICC3 | 0.9262 | 26.11  | 34 | 34 | 2.86E-16 | 0.873  | 0.958 | v6.0          | HCP |
| LH_middletemporal_thickavg  | ICC2 | 0.7551 | 65.33  | 34 | 34 | 9.96E-23 | -0.012 | 0.923 | v6.0 vs. v7.1 | HCP |
| LH_middletemporal_thickavg  | ICC3 | 0.9459 | 35.95  | 34 | 34 | 1.73E-18 | 0.906  | 0.969 | v7.1          | HCP |
| LH_Pallidum                 | ICC3 | 0.7548 | 7.16   | 34 | 34 | 5.22E-08 | 0.603  | 0.854 | v5.3          | HCP |
| LH_Pallidum                 | ICC2 | 0.1522 | 3.69   | 34 | 34 | 1.29E-04 | -0.049 | 0.408 | v5.3 vs. v6.0 | HCP |
| LH_Pallidum                 | ICC2 | 0.1607 | 4.06   | 34 | 34 | 4.73E-05 | -0.047 | 0.424 | v5.3 vs. v7.1 | HCP |
| LH_Pallidum                 | ICC3 | 0.8271 | 10.57  | 34 | 34 | 2.53E-10 | 0.713  | 0.899 | v6.0          | HCP |
| LH_Pallidum                 | ICC2 | 0.8954 | 17.71  | 34 | 34 | 1.21E-13 | 0.822  | 0.940 | v6.0 vs. v7.1 | HCP |
| LH_Pallidum                 | ICC3 | 0.9096 | 21.13  | 34 | 34 | 7.92E-15 | 0.845  | 0.948 | v7.1          | HCP |
| LH_paracentral_surfavg      | ICC3 | 0.9700 | 65.64  | 34 | 34 | 9.21E-23 | 0.947  | 0.983 | v5.3          | HCP |
| LH_paracentral_surfavg      | ICC2 | 0.8239 | 10.84  | 34 | 34 | 1.76E-10 | 0.707  | 0.897 | v5.3 vs. v6.0 | HCP |
| LH_paracentral_surfavg      | ICC2 | 0.8171 | 9.91   | 34 | 34 | 6.26E-10 | 0.699  | 0.892 | v5.3 vs. v7.1 | HCP |
| LH_paracentral_surfavg      | ICC3 | 0.9817 | 108.24 | 34 | 34 | 2.26E-26 | 0.968  | 0.990 | v6.0          | HCP |
| LH_paracentral_surfavg      | ICC2 | 0.9809 | 115.46 | 34 | 34 | 7.68E-27 | 0.964  | 0.989 | v6.0 vs. v7.1 | HCP |
| LH_paracentral_surfavg      | ICC3 | 0.9666 | 58.89  | 34 | 34 | 5.51E-22 | 0.942  | 0.981 | v7.1          | HCP |
| LH_paracentral_thickavg     | ICC3 | 0.9176 | 23.27  | 34 | 34 | 1.75E-15 | 0.858  | 0.953 | v5.3          | HCP |
| LH_paracentral_thickavg     | ICC2 | 0.8706 | 20.65  | 34 | 34 | 1.14E-14 | 0.676  | 0.938 | v5.3 vs. v6.0 | HCP |
| LH_paracentral_thickavg     | ICC2 | 0.9294 | 28.92  | 34 | 34 | 5.67E-17 | 0.877  | 0.960 | v5.3 vs. v7.1 | HCP |
| LH_paracentral_thickavg     | ICC3 | 0.9145 | 22.39  | 34 | 34 | 3.22E-15 | 0.853  | 0.951 | v6.0          | HCP |
| LH_paracentral_thickavg     | ICC2 | 0.9499 | 55.47  | 34 | 34 | 1.47E-21 | 0.863  | 0.977 | v6.0 vs. v7.1 | HCP |
| LH_paracentral_thickavg     | ICC3 | 0.9495 | 38.61  | 34 | 34 | 5.46E-19 | 0.912  | 0.971 | v7.1          | HCP |
| LH parahippocampal_surfavg  | ICC3 | 0.8415 | 11.62  | 34 | 34 | 6.47E-11 | 0.735  | 0.907 | v5.3          | HCP |
| LH parahippocampal_surfavg  | ICC2 | 0.7660 | 7.97   | 34 | 34 | 1.25E-08 | 0.619  | 0.861 | v5.3 vs. v6.0 | HCP |
| LH parahippocampal_surfavg  | ICC2 | 0.7333 | 7.85   | 34 | 34 | 1.53E-08 | 0.525  | 0.850 | v5.3 vs. v7.1 | HCP |
| LH parahippocampal_surfavg  | ICC3 | 0.9622 | 51.88  | 34 | 34 | 4.43E-21 | 0.934  | 0.978 | v6.0          | HCP |
| LH parahippocampal_surfavg  | ICC2 | 0.9562 | 59.00  | 34 | 34 | 5.35E-22 | 0.896  | 0.978 | v6.0 vs. v7.1 | HCP |
| LH parahippocampal_surfavg  | ICC3 | 0.9309 | 27.93  | 34 | 34 | 9.87E-17 | 0.881  | 0.960 | v7.1          | HCP |
| LH parahippocampal_thickavg | ICC3 | 0.9334 | 29.04  | 34 | 34 | 5.29E-17 | 0.885  | 0.962 | v5.3          | HCP |
| LH parahippocampal_thickavg | ICC2 | 0.9628 | 52.61  | 34 | 34 | 3.52E-21 | 0.935  | 0.979 | v5.3 vs. v6.0 | HCP |
| LH parahippocampal_thickavg | ICC2 | 0.8518 | 33.49  | 34 | 34 | 5.42E-18 | 0.230  | 0.947 | v5.3 vs. v7.1 | HCP |
| LH parahippocampal_thickavg | ICC3 | 0.9620 | 51.70  | 34 | 34 | 4.68E-21 | 0.934  | 0.978 | v6.0          | HCP |
| LH parahippocampal_thickavg | ICC2 | 0.8577 | 74.28  | 34 | 34 | 1.19E-23 | 0.039  | 0.957 | v6.0 vs. v7.1 | HCP |
| LH parahippocampal_thickavg | ICC3 | 0.9594 | 48.29  | 34 | 34 | 1.43E-20 | 0.929  | 0.977 | v7.1          | HCP |
| LH_parsopercularis_surfavg  | ICC3 | 0.9740 | 75.96  | 34 | 34 | 8.21E-24 | 0.954  | 0.985 | v5.3          | HCP |
| LH_parsopercularis_surfavg  | ICC2 | 0.8692 | 23.50  | 34 | 34 | 1.51E-15 | 0.591  | 0.943 | v5.3 vs. v6.0 | HCP |
| LH_parsopercularis_surfavg  | ICC2 | 0.6975 | 5.73   | 34 | 34 | 8.76E-07 | 0.523  | 0.817 | v5.3 vs. v7.1 | HCP |
| LH_parsopercularis_surfavg  | ICC3 | 0.9913 | 228.08 | 34 | 34 | 8.29E-32 | 0.985  | 0.995 | v6.0          | HCP |
| LH_parsopercularis_surfavg  | ICC2 | 0.7094 | 5.89   | 34 | 34 | 6.29E-07 | 0.539  | 0.824 | v6.0 vs. v7.1 | HCP |
| LH_parsopercularis_surfavg  | ICC3 | 0.9963 | 541.13 | 34 | 34 | 3.76E-38 | 0.993  | 0.998 | v7.1          | HCP |
| LH_parsopercularis_thickavg | ICC3 | 0.8492 | 12.27  | 34 | 34 | 2.94E-11 | 0.748  | 0.912 | v5.3          | HCP |
| LH_parsopercularis_thickavg | ICC2 | 0.8501 | 19.94  | 34 | 34 | 1.95E-14 | 0.557  | 0.933 | v5.3 vs. v6.0 | HCP |

|                              |      |        |        |    |    |          |        |       |               |     |
|------------------------------|------|--------|--------|----|----|----------|--------|-------|---------------|-----|
| LH_parsopercularis_thickavg  | ICC2 | 0.8813 | 16.39  | 34 | 34 | 3.93E-13 | 0.799  | 0.931 | v5.3 vs. v7.1 | HCP |
| LH_parsopercularis_thickavg  | ICC3 | 0.8707 | 14.47  | 34 | 34 | 2.56E-12 | 0.782  | 0.925 | v6.0          | HCP |
| LH_parsopercularis_thickavg  | ICC2 | 0.8295 | 27.57  | 34 | 34 | 1.21E-16 | 0.208  | 0.938 | v6.0 vs. v7.1 | HCP |
| LH_parsopercularis_thickavg  | ICC3 | 0.8889 | 17.01  | 34 | 34 | 2.24E-13 | 0.811  | 0.936 | v7.1          | HCP |
| LH_parsorbitalis_surfavg     | ICC3 | 0.9423 | 33.64  | 34 | 34 | 5.03E-18 | 0.900  | 0.967 | v5.3          | HCP |
| LH_parsorbitalis_surfavg     | ICC2 | 0.6648 | 16.03  | 34 | 34 | 5.51E-13 | -0.017 | 0.871 | v5.3 vs. v6.0 | HCP |
| LH_parsorbitalis_surfavg     | ICC2 | 0.5906 | 16.01  | 34 | 34 | 5.60E-13 | -0.046 | 0.839 | v5.3 vs. v7.1 | HCP |
| LH_parsorbitalis_surfavg     | ICC3 | 0.9719 | 70.14  | 34 | 34 | 3.08E-23 | 0.951  | 0.984 | v6.0          | HCP |
| LH_parsorbitalis_surfavg     | ICC2 | 0.9464 | 60.82  | 34 | 34 | 3.24E-22 | 0.800  | 0.978 | v6.0 vs. v7.1 | HCP |
| LH_parsorbitalis_surfavg     | ICC3 | 0.9655 | 56.96  | 34 | 34 | 9.55E-22 | 0.940  | 0.980 | v7.1          | HCP |
| LH_parsorbitalis_thickavg    | ICC3 | 0.9067 | 20.44  | 34 | 34 | 1.33E-14 | 0.840  | 0.946 | v5.3          | HCP |
| LH_parsorbitalis_thickavg    | ICC2 | 0.9344 | 28.89  | 34 | 34 | 5.74E-17 | 0.887  | 0.962 | v5.3 vs. v6.0 | HCP |
| LH_parsorbitalis_thickavg    | ICC2 | 0.7674 | 15.27  | 34 | 34 | 1.15E-12 | 0.244  | 0.903 | v5.3 vs. v7.1 | HCP |
| LH_parsorbitalis_thickavg    | ICC3 | 0.9188 | 23.65  | 34 | 34 | 1.37E-15 | 0.861  | 0.953 | v6.0          | HCP |
| LH_parsorbitalis_thickavg    | ICC2 | 0.8182 | 36.75  | 34 | 34 | 1.21E-18 | 0.063  | 0.939 | v6.0 vs. v7.1 | HCP |
| LH_parsorbitalis_thickavg    | ICC3 | 0.8994 | 18.88  | 34 | 34 | 4.54E-14 | 0.828  | 0.942 | v7.1          | HCP |
| LH_parstriangularis_surfavg  | ICC3 | 0.9528 | 41.36  | 34 | 34 | 1.79E-19 | 0.918  | 0.973 | v5.3          | HCP |
| LH_parstriangularis_surfavg  | ICC2 | 0.7617 | 8.62   | 34 | 34 | 4.34E-09 | 0.584  | 0.864 | v5.3 vs. v6.0 | HCP |
| LH_parstriangularis_surfavg  | ICC2 | 0.6631 | 6.07   | 34 | 34 | 4.36E-07 | 0.415  | 0.807 | v5.3 vs. v7.1 | HCP |
| LH_parstriangularis_surfavg  | ICC3 | 0.9695 | 64.65  | 34 | 34 | 1.18E-22 | 0.947  | 0.983 | v6.0          | HCP |
| LH_parstriangularis_surfavg  | ICC2 | 0.9492 | 43.82  | 34 | 34 | 6.98E-20 | 0.904  | 0.972 | v6.0 vs. v7.1 | HCP |
| LH_parstriangularis_surfavg  | ICC3 | 0.9875 | 159.08 | 34 | 34 | 3.57E-29 | 0.978  | 0.993 | v7.1          | HCP |
| LH_parstriangularis_thickavg | ICC3 | 0.8185 | 10.02  | 34 | 34 | 5.37E-10 | 0.699  | 0.893 | v5.3          | HCP |
| LH_parstriangularis_thickavg | ICC2 | 0.8559 | 14.12  | 34 | 34 | 3.68E-12 | 0.750  | 0.917 | v5.3 vs. v6.0 | HCP |
| LH_parstriangularis_thickavg | ICC2 | 0.7192 | 8.86   | 34 | 34 | 2.98E-09 | 0.392  | 0.858 | v5.3 vs. v7.1 | HCP |
| LH_parstriangularis_thickavg | ICC3 | 0.8514 | 12.46  | 34 | 34 | 2.33E-11 | 0.751  | 0.913 | v6.0          | HCP |
| LH_parstriangularis_thickavg | ICC2 | 0.7147 | 16.24  | 34 | 34 | 4.50E-13 | 0.045  | 0.890 | v6.0 vs. v7.1 | HCP |
| LH_parstriangularis_thickavg | ICC3 | 0.8912 | 17.38  | 34 | 34 | 1.61E-13 | 0.815  | 0.937 | v7.1          | HCP |
| LH_pericalcarine_surfavg     | ICC3 | 0.9249 | 25.63  | 34 | 34 | 3.84E-16 | 0.871  | 0.957 | v5.3          | HCP |
| LH_pericalcarine_surfavg     | ICC2 | 0.8145 | 10.49  | 34 | 34 | 2.79E-10 | 0.689  | 0.892 | v5.3 vs. v6.0 | HCP |
| LH_pericalcarine_surfavg     | ICC2 | 0.8397 | 13.41  | 34 | 34 | 7.91E-12 | 0.707  | 0.911 | v5.3 vs. v7.1 | HCP |
| LH_pericalcarine_surfavg     | ICC3 | 0.9848 | 130.85 | 34 | 34 | 9.45E-28 | 0.973  | 0.991 | v6.0          | HCP |
| LH_pericalcarine_surfavg     | ICC2 | 0.9778 | 91.97  | 34 | 34 | 3.42E-25 | 0.961  | 0.987 | v6.0 vs. v7.1 | HCP |
| LH_pericalcarine_surfavg     | ICC3 | 0.9869 | 151.21 | 34 | 34 | 8.36E-29 | 0.977  | 0.993 | v7.1          | HCP |
| LH_pericalcarine_thickavg    | ICC3 | 0.9046 | 19.96  | 34 | 34 | 1.92E-14 | 0.837  | 0.945 | v5.3          | HCP |
| LH_pericalcarine_thickavg    | ICC2 | 0.8320 | 13.86  | 34 | 34 | 4.86E-12 | 0.660  | 0.911 | v5.3 vs. v6.0 | HCP |
| LH_pericalcarine_thickavg    | ICC2 | 0.8401 | 11.26  | 34 | 34 | 1.01E-10 | 0.733  | 0.907 | v5.3 vs. v7.1 | HCP |
| LH_pericalcarine_thickavg    | ICC3 | 0.8650 | 13.82  | 34 | 34 | 5.08E-12 | 0.773  | 0.922 | v6.0          | HCP |
| LH_pericalcarine_thickavg    | ICC2 | 0.9110 | 30.80  | 34 | 34 | 2.07E-17 | 0.765  | 0.958 | v6.0 vs. v7.1 | HCP |
| LH_pericalcarine_thickavg    | ICC3 | 0.9088 | 20.92  | 34 | 34 | 9.27E-15 | 0.844  | 0.947 | v7.1          | HCP |
| LH_postcentral_surfavg       | ICC3 | 0.9903 | 204.35 | 34 | 34 | 5.28E-31 | 0.983  | 0.994 | v5.3          | HCP |
| LH_postcentral_surfavg       | ICC2 | 0.9737 | 98.04  | 34 | 34 | 1.18E-25 | 0.937  | 0.987 | v5.3 vs. v6.0 | HCP |
| LH_postcentral_surfavg       | ICC2 | 0.8618 | 13.66  | 34 | 34 | 6.01E-12 | 0.769  | 0.919 | v5.3 vs. v7.1 | HCP |
| LH_postcentral_surfavg       | ICC3 | 0.9939 | 325.53 | 34 | 34 | 2.04E-34 | 0.989  | 0.997 | v6.0          | HCP |

|                                |      |        |        |    |    |          |        |       |               |     |
|--------------------------------|------|--------|--------|----|----|----------|--------|-------|---------------|-----|
| LH_postcentral_surfavg         | ICC2 | 0.9117 | 21.06  | 34 | 34 | 8.36E-15 | 0.849  | 0.949 | v6.0 vs. v7.1 | HCP |
| LH_postcentral_surfavg         | ICC3 | 0.9778 | 88.99  | 34 | 34 | 5.92E-25 | 0.961  | 0.987 | v7.1          | HCP |
| LH_postcentral_thickavg        | ICC3 | 0.9748 | 78.39  | 34 | 34 | 4.88E-24 | 0.956  | 0.986 | v5.3          | HCP |
| LH_postcentral_thickavg        | ICC2 | 0.9237 | 51.66  | 34 | 34 | 4.74E-21 | 0.615  | 0.971 | v5.3 vs. v6.0 | HCP |
| LH_postcentral_thickavg        | ICC2 | 0.8205 | 9.96   | 34 | 34 | 5.86E-10 | 0.703  | 0.895 | v5.3 vs. v7.1 | HCP |
| LH_postcentral_thickavg        | ICC3 | 0.9506 | 39.45  | 34 | 34 | 3.85E-19 | 0.914  | 0.972 | v6.0          | HCP |
| LH_postcentral_thickavg        | ICC2 | 0.8454 | 13.51  | 34 | 34 | 7.12E-12 | 0.726  | 0.913 | v6.0 vs. v7.1 | HCP |
| LH_postcentral_thickavg        | ICC3 | 0.9560 | 44.44  | 34 | 34 | 5.55E-20 | 0.923  | 0.975 | v7.1          | HCP |
| LH_posteriorcingulate_surfavg  | ICC3 | 0.9286 | 27.01  | 34 | 34 | 1.67E-16 | 0.877  | 0.959 | v5.3          | HCP |
| LH_posteriorcingulate_surfavg  | ICC2 | 0.8323 | 10.69  | 34 | 34 | 2.15E-10 | 0.721  | 0.902 | v5.3 vs. v6.0 | HCP |
| LH_posteriorcingulate_surfavg  | ICC2 | 0.8623 | 13.21  | 34 | 34 | 9.94E-12 | 0.768  | 0.920 | v5.3 vs. v7.1 | HCP |
| LH_posteriorcingulate_surfavg  | ICC3 | 0.9877 | 160.95 | 34 | 34 | 2.93E-29 | 0.978  | 0.993 | v6.0          | HCP |
| LH_posteriorcingulate_surfavg  | ICC2 | 0.9779 | 99.24  | 34 | 34 | 9.63E-26 | 0.959  | 0.988 | v6.0 vs. v7.1 | HCP |
| LH_posteriorcingulate_surfavg  | ICC3 | 0.9807 | 102.51 | 34 | 34 | 5.60E-26 | 0.966  | 0.989 | v7.1          | HCP |
| LH_posteriorcingulate_thickavg | ICC3 | 0.8941 | 17.88  | 34 | 34 | 1.04E-13 | 0.820  | 0.939 | v5.3          | HCP |
| LH_posteriorcingulate_thickavg | ICC2 | 0.8619 | 17.48  | 34 | 34 | 1.47E-13 | 0.706  | 0.929 | v5.3 vs. v6.0 | HCP |
| LH_posteriorcingulate_thickavg | ICC2 | 0.4565 | 12.52  | 34 | 34 | 2.18E-11 | -0.050 | 0.759 | v5.3 vs. v7.1 | HCP |
| LH_posteriorcingulate_thickavg | ICC3 | 0.9138 | 22.21  | 34 | 34 | 3.66E-15 | 0.852  | 0.950 | v6.0          | HCP |
| LH_posteriorcingulate_thickavg | ICC2 | 0.5980 | 26.27  | 34 | 34 | 2.61E-16 | -0.035 | 0.850 | v6.0 vs. v7.1 | HCP |
| LH_posteriorcingulate_thickavg | ICC3 | 0.9394 | 32.02  | 34 | 34 | 1.11E-17 | 0.895  | 0.965 | v7.1          | HCP |
| LH_precentral_surfavg          | ICC3 | 0.9892 | 184.87 | 34 | 34 | 2.85E-30 | 0.981  | 0.994 | v5.3          | HCP |
| LH_precentral_surfavg          | ICC2 | 0.9760 | 110.90 | 34 | 34 | 1.51E-26 | 0.939  | 0.988 | v5.3 vs. v6.0 | HCP |
| LH_precentral_surfavg          | ICC2 | 0.9771 | 98.51  | 34 | 34 | 1.09E-25 | 0.956  | 0.988 | v5.3 vs. v7.1 | HCP |
| LH_precentral_surfavg          | ICC3 | 0.9866 | 148.04 | 34 | 34 | 1.19E-28 | 0.976  | 0.992 | v6.0          | HCP |
| LH_precentral_surfavg          | ICC2 | 0.9943 | 379.92 | 34 | 34 | 1.50E-35 | 0.989  | 0.997 | v6.0 vs. v7.1 | HCP |
| LH_precentral_surfavg          | ICC3 | 0.9906 | 210.76 | 34 | 34 | 3.14E-31 | 0.983  | 0.995 | v7.1          | HCP |
| LH_precentral_thickavg         | ICC3 | 0.9276 | 26.61  | 34 | 34 | 2.12E-16 | 0.875  | 0.958 | v5.3          | HCP |
| LH_precentral_thickavg         | ICC2 | 0.9213 | 61.36  | 34 | 34 | 2.81E-22 | 0.475  | 0.973 | v5.3 vs. v6.0 | HCP |
| LH_precentral_thickavg         | ICC2 | 0.8623 | 14.52  | 34 | 34 | 2.42E-12 | 0.765  | 0.921 | v5.3 vs. v7.1 | HCP |
| LH_precentral_thickavg         | ICC3 | 0.8816 | 15.89  | 34 | 34 | 6.31E-13 | 0.799  | 0.931 | v6.0          | HCP |
| LH_precentral_thickavg         | ICC2 | 0.8042 | 17.60  | 34 | 34 | 1.33E-13 | 0.343  | 0.918 | v6.0 vs. v7.1 | HCP |
| LH_precentral_thickavg         | ICC3 | 0.9243 | 25.42  | 34 | 34 | 4.37E-16 | 0.870  | 0.957 | v7.1          | HCP |
| LH_precuneus_surfavg           | ICC3 | 0.9887 | 176.68 | 34 | 34 | 6.11E-30 | 0.980  | 0.994 | v5.3          | HCP |
| LH_precuneus_surfavg           | ICC2 | 0.9119 | 22.00  | 34 | 34 | 4.23E-15 | 0.850  | 0.949 | v5.3 vs. v6.0 | HCP |
| LH_precuneus_surfavg           | ICC2 | 0.7545 | 7.20   | 34 | 34 | 4.82E-08 | 0.605  | 0.853 | v5.3 vs. v7.1 | HCP |
| LH_precuneus_surfavg           | ICC3 | 0.9955 | 441.05 | 34 | 34 | 1.20E-36 | 0.992  | 0.997 | v6.0          | HCP |
| LH_precuneus_surfavg           | ICC2 | 0.8993 | 18.58  | 34 | 34 | 5.79E-14 | 0.829  | 0.942 | v6.0 vs. v7.1 | HCP |
| LH_precuneus_surfavg           | ICC3 | 0.9895 | 189.74 | 34 | 34 | 1.84E-30 | 0.981  | 0.994 | v7.1          | HCP |
| LH_precuneus_thickavg          | ICC3 | 0.9273 | 26.49  | 34 | 34 | 2.28E-16 | 0.875  | 0.958 | v5.3          | HCP |
| LH_precuneus_thickavg          | ICC2 | 0.8427 | 16.57  | 34 | 34 | 3.34E-13 | 0.624  | 0.923 | v5.3 vs. v6.0 | HCP |
| LH_precuneus_thickavg          | ICC2 | 0.8524 | 15.90  | 34 | 34 | 6.25E-13 | 0.698  | 0.922 | v5.3 vs. v7.1 | HCP |
| LH_precuneus_thickavg          | ICC3 | 0.8926 | 17.62  | 34 | 34 | 1.31E-13 | 0.817  | 0.938 | v6.0          | HCP |
| LH_precuneus_thickavg          | ICC2 | 0.7747 | 40.88  | 34 | 34 | 2.16E-19 | -0.005 | 0.926 | v6.0 vs. v7.1 | HCP |
| LH_precuneus_thickavg          | ICC3 | 0.9531 | 41.61  | 34 | 34 | 1.62E-19 | 0.918  | 0.973 | v7.1          | HCP |

|                                      |      |        |        |    |    |          |        |       |               |     |
|--------------------------------------|------|--------|--------|----|----|----------|--------|-------|---------------|-----|
| LH_Putamen                           | ICC3 | 0.8899 | 17.16  | 34 | 34 | 1.96E-13 | 0.813  | 0.936 | v5.3          | HCP |
| LH_Putamen                           | ICC2 | 0.6571 | 14.84  | 34 | 34 | 1.75E-12 | -0.015 | 0.866 | v5.3 vs. v6.0 | HCP |
| LH_Putamen                           | ICC2 | 0.7007 | 13.58  | 34 | 34 | 6.60E-12 | 0.073  | 0.879 | v5.3 vs. v7.1 | HCP |
| LH_Putamen                           | ICC3 | 0.8870 | 16.70  | 34 | 34 | 2.97E-13 | 0.808  | 0.935 | v6.0          | HCP |
| LH_Putamen                           | ICC2 | 0.9250 | 29.08  | 34 | 34 | 5.19E-17 | 0.861  | 0.958 | v6.0 vs. v7.1 | HCP |
| LH_Putamen                           | ICC3 | 0.9712 | 68.42  | 34 | 34 | 4.64E-23 | 0.950  | 0.984 | v7.1          | HCP |
| LH_rostralanteriorcingulate_surfavg  | ICC3 | 0.9791 | 94.59  | 34 | 34 | 2.14E-25 | 0.963  | 0.988 | v5.3          | HCP |
| LH_rostralanteriorcingulate_surfavg  | ICC2 | 0.9252 | 34.71  | 34 | 34 | 3.04E-18 | 0.821  | 0.963 | v5.3 vs. v6.0 | HCP |
| LH_rostralanteriorcingulate_surfavg  | ICC2 | 0.9155 | 23.63  | 34 | 34 | 1.39E-15 | 0.855  | 0.952 | v5.3 vs. v7.1 | HCP |
| LH_rostralanteriorcingulate_surfavg  | ICC3 | 0.9637 | 54.16  | 34 | 34 | 2.18E-21 | 0.937  | 0.979 | v6.0          | HCP |
| LH_rostralanteriorcingulate_surfavg  | ICC2 | 0.9519 | 42.89  | 34 | 34 | 9.92E-20 | 0.915  | 0.973 | v6.0 vs. v7.1 | HCP |
| LH_rostralanteriorcingulate_surfavg  | ICC3 | 0.9800 | 99.12  | 34 | 34 | 9.82E-26 | 0.965  | 0.989 | v7.1          | HCP |
| LH_rostralanteriorcingulate_thickavg | ICC3 | 0.7654 | 7.53   | 34 | 34 | 2.70E-08 | 0.619  | 0.860 | v5.3          | HCP |
| LH_rostralanteriorcingulate_thickavg | ICC2 | 0.8046 | 10.05  | 34 | 34 | 5.17E-10 | 0.671  | 0.886 | v5.3 vs. v6.0 | HCP |
| LH_rostralanteriorcingulate_thickavg | ICC2 | 0.6934 | 11.78  | 34 | 34 | 5.26E-11 | 0.113  | 0.870 | v5.3 vs. v7.1 | HCP |
| LH_rostralanteriorcingulate_thickavg | ICC3 | 0.7507 | 7.02   | 34 | 34 | 6.71E-08 | 0.597  | 0.851 | v6.0          | HCP |
| LH_rostralanteriorcingulate_thickavg | ICC2 | 0.5928 | 11.20  | 34 | 34 | 1.10E-10 | -0.032 | 0.830 | v6.0 vs. v7.1 | HCP |
| LH_rostralanteriorcingulate_thickavg | ICC3 | 0.8311 | 10.84  | 34 | 34 | 1.75E-10 | 0.719  | 0.901 | v7.1          | HCP |
| LH_rostralmiddlefrontal_surfavg      | ICC3 | 0.9930 | 283.54 | 34 | 34 | 2.11E-33 | 0.988  | 0.996 | v5.3          | HCP |
| LH_rostralmiddlefrontal_surfavg      | ICC2 | 0.9825 | 110.84 | 34 | 34 | 1.52E-26 | 0.969  | 0.990 | v5.3 vs. v6.0 | HCP |
| LH_rostralmiddlefrontal_surfavg      | ICC2 | 0.9078 | 21.80  | 34 | 34 | 4.88E-15 | 0.841  | 0.947 | v5.3 vs. v7.1 | HCP |
| LH_rostralmiddlefrontal_surfavg      | ICC3 | 0.9928 | 277.01 | 34 | 34 | 3.12E-33 | 0.987  | 0.996 | v6.0          | HCP |
| LH_rostralmiddlefrontal_surfavg      | ICC2 | 0.9129 | 23.56  | 34 | 34 | 1.45E-15 | 0.848  | 0.950 | v6.0 vs. v7.1 | HCP |
| LH_rostralmiddlefrontal_surfavg      | ICC3 | 0.9967 | 605.99 | 34 | 34 | 5.52E-39 | 0.994  | 0.998 | v7.1          | HCP |
| LH_rostralmiddlefrontal_thickavg     | ICC3 | 0.8472 | 12.09  | 34 | 34 | 3.65E-11 | 0.744  | 0.911 | v5.3          | HCP |
| LH_rostralmiddlefrontal_thickavg     | ICC2 | 0.9141 | 22.19  | 34 | 34 | 3.70E-15 | 0.853  | 0.950 | v5.3 vs. v6.0 | HCP |
| LH_rostralmiddlefrontal_thickavg     | ICC2 | 0.7312 | 18.16  | 34 | 34 | 8.24E-14 | 0.047  | 0.898 | v5.3 vs. v7.1 | HCP |
| LH_rostralmiddlefrontal_thickavg     | ICC3 | 0.8569 | 12.98  | 34 | 34 | 1.28E-11 | 0.760  | 0.917 | v6.0          | HCP |
| LH_rostralmiddlefrontal_thickavg     | ICC2 | 0.7237 | 28.56  | 34 | 34 | 6.92E-17 | -0.019 | 0.904 | v6.0 vs. v7.1 | HCP |
| LH_rostralmiddlefrontal_thickavg     | ICC3 | 0.9242 | 25.39  | 34 | 34 | 4.47E-16 | 0.870  | 0.957 | v7.1          | HCP |
| LH_superiorfrontal_surfavg           | ICC3 | 0.9943 | 348.69 | 34 | 34 | 6.39E-35 | 0.990  | 0.997 | v5.3          | HCP |
| LH_superiorfrontal_surfavg           | ICC2 | 0.9574 | 58.13  | 34 | 34 | 6.83E-22 | 0.906  | 0.978 | v5.3 vs. v6.0 | HCP |
| LH_superiorfrontal_surfavg           | ICC2 | 0.8573 | 18.36  | 34 | 34 | 6.96E-14 | 0.655  | 0.931 | v5.3 vs. v7.1 | HCP |
| LH_superiorfrontal_surfavg           | ICC3 | 0.9945 | 359.72 | 34 | 34 | 3.77E-35 | 0.990  | 0.997 | v6.0          | HCP |
| LH_superiorfrontal_surfavg           | ICC2 | 0.9173 | 26.83  | 34 | 34 | 1.86E-16 | 0.844  | 0.955 | v6.0 vs. v7.1 | HCP |
| LH_superiorfrontal_surfavg           | ICC3 | 0.9966 | 594.28 | 34 | 34 | 7.69E-39 | 0.994  | 0.998 | v7.1          | HCP |
| LH_superiorfrontal_thickavg          | ICC3 | 0.9099 | 21.20  | 34 | 34 | 7.54E-15 | 0.846  | 0.948 | v5.3          | HCP |
| LH_superiorfrontal_thickavg          | ICC2 | 0.9649 | 60.46  | 34 | 34 | 3.58E-22 | 0.937  | 0.980 | v5.3 vs. v6.0 | HCP |
| LH_superiorfrontal_thickavg          | ICC2 | 0.8218 | 40.33  | 34 | 34 | 2.69E-19 | 0.052  | 0.941 | v5.3 vs. v7.1 | HCP |
| LH_superiorfrontal_thickavg          | ICC3 | 0.9149 | 22.50  | 34 | 34 | 2.99E-15 | 0.854  | 0.951 | v6.0          | HCP |
| LH_superiorfrontal_thickavg          | ICC2 | 0.8602 | 57.33  | 34 | 34 | 8.59E-22 | 0.079  | 0.956 | v6.0 vs. v7.1 | HCP |
| LH_superiorfrontal_thickavg          | ICC3 | 0.9461 | 36.09  | 34 | 34 | 1.62E-18 | 0.906  | 0.969 | v7.1          | HCP |
| LH_superiorparietal_surfavg          | ICC3 | 0.9886 | 174.84 | 34 | 34 | 7.29E-30 | 0.980  | 0.994 | v5.3          | HCP |
| LH_superiorparietal_surfavg          | ICC2 | 0.9003 | 26.88  | 34 | 34 | 1.81E-16 | 0.748  | 0.952 | v5.3 vs. v6.0 | HCP |

|                              |      |        |         |    |    |          |        |       |               |     |
|------------------------------|------|--------|---------|----|----|----------|--------|-------|---------------|-----|
| LH_superiorparietal_surfavg  | ICC2 | 0.7535 | 7.81    | 34 | 34 | 1.66E-08 | 0.592  | 0.855 | v5.3 vs. v7.1 | HCP |
| LH_superiorparietal_surfavg  | ICC3 | 0.9933 | 296.63  | 34 | 34 | 9.83E-34 | 0.988  | 0.996 | v6.0          | HCP |
| LH_superiorparietal_surfavg  | ICC2 | 0.9010 | 18.68   | 34 | 34 | 5.33E-14 | 0.831  | 0.943 | v6.0 vs. v7.1 | HCP |
| LH_superiorparietal_surfavg  | ICC3 | 0.9896 | 190.64  | 34 | 34 | 1.70E-30 | 0.982  | 0.994 | v7.1          | HCP |
| LH_superiorparietal_thickavg | ICC3 | 0.9580 | 46.60   | 34 | 34 | 2.57E-20 | 0.927  | 0.976 | v5.3          | HCP |
| LH_superiorparietal_thickavg | ICC2 | 0.8906 | 41.09   | 34 | 34 | 1.99E-19 | 0.403  | 0.960 | v5.3 vs. v6.0 | HCP |
| LH_superiorparietal_thickavg | ICC2 | 0.9481 | 41.41   | 34 | 34 | 1.75E-19 | 0.906  | 0.971 | v5.3 vs. v7.1 | HCP |
| LH_superiorparietal_thickavg | ICC3 | 0.9388 | 31.67   | 34 | 34 | 1.33E-17 | 0.894  | 0.965 | v6.0          | HCP |
| LH_superiorparietal_thickavg | ICC2 | 0.8705 | 85.22   | 34 | 34 | 1.22E-24 | 0.047  | 0.961 | v6.0 vs. v7.1 | HCP |
| LH_superiorparietal_thickavg | ICC3 | 0.9670 | 59.65   | 34 | 34 | 4.46E-22 | 0.942  | 0.981 | v7.1          | HCP |
| LH_superiortemporal_surfavg  | ICC3 | 0.9803 | 100.44  | 34 | 34 | 7.87E-26 | 0.965  | 0.989 | v5.3          | HCP |
| LH_superiortemporal_surfavg  | ICC2 | 0.8939 | 37.69   | 34 | 34 | 8.07E-19 | 0.492  | 0.960 | v5.3 vs. v6.0 | HCP |
| LH_superiortemporal_surfavg  | ICC2 | 0.8563 | 46.41   | 34 | 34 | 2.74E-20 | 0.118  | 0.953 | v5.3 vs. v7.1 | HCP |
| LH_superiortemporal_surfavg  | ICC3 | 0.9906 | 211.68  | 34 | 34 | 2.91E-31 | 0.983  | 0.995 | v6.0          | HCP |
| LH_superiortemporal_surfavg  | ICC2 | 0.9832 | 242.37  | 34 | 34 | 2.97E-32 | 0.895  | 0.994 | v6.0 vs. v7.1 | HCP |
| LH_superiortemporal_surfavg  | ICC3 | 0.9901 | 201.23  | 34 | 34 | 6.84E-31 | 0.983  | 0.994 | v7.1          | HCP |
| LH_superiortemporal_thickavg | ICC3 | 0.9263 | 26.13   | 34 | 34 | 2.83E-16 | 0.873  | 0.958 | v5.3          | HCP |
| LH_superiortemporal_thickavg | ICC2 | 0.9382 | 30.51   | 34 | 34 | 2.41E-17 | 0.893  | 0.965 | v5.3 vs. v6.0 | HCP |
| LH_superiortemporal_thickavg | ICC2 | 0.7230 | 26.05   | 34 | 34 | 2.98E-16 | -0.015 | 0.903 | v5.3 vs. v7.1 | HCP |
| LH_superiortemporal_thickavg | ICC3 | 0.9105 | 21.36   | 34 | 34 | 6.72E-15 | 0.847  | 0.949 | v6.0          | HCP |
| LH_superiortemporal_thickavg | ICC2 | 0.7327 | 46.62   | 34 | 34 | 2.55E-20 | -0.019 | 0.913 | v6.0 vs. v7.1 | HCP |
| LH_superiortemporal_thickavg | ICC3 | 0.9379 | 31.21   | 34 | 34 | 1.68E-17 | 0.893  | 0.964 | v7.1          | HCP |
| LH_supramarginal_surfavg     | ICC3 | 0.9944 | 356.94  | 34 | 34 | 4.30E-35 | 0.990  | 0.997 | v5.3          | HCP |
| LH_supramarginal_surfavg     | ICC2 | 0.9040 | 25.58   | 34 | 34 | 3.96E-16 | 0.790  | 0.951 | v5.3 vs. v6.0 | HCP |
| LH_supramarginal_surfavg     | ICC2 | 0.8723 | 17.51   | 34 | 34 | 1.44E-13 | 0.756  | 0.931 | v5.3 vs. v7.1 | HCP |
| LH_supramarginal_surfavg     | ICC3 | 0.9967 | 614.09  | 34 | 34 | 4.41E-39 | 0.994  | 0.998 | v6.0          | HCP |
| LH_supramarginal_surfavg     | ICC2 | 0.9826 | 110.87  | 34 | 34 | 1.51E-26 | 0.969  | 0.990 | v6.0 vs. v7.1 | HCP |
| LH_supramarginal_surfavg     | ICC3 | 0.9967 | 598.79  | 34 | 34 | 6.76E-39 | 0.994  | 0.998 | v7.1          | HCP |
| LH_supramarginal_thickavg    | ICC3 | 0.9218 | 24.56   | 34 | 34 | 7.52E-16 | 0.865  | 0.955 | v5.3          | HCP |
| LH_supramarginal_thickavg    | ICC2 | 0.9042 | 20.77   | 34 | 34 | 1.03E-14 | 0.836  | 0.945 | v5.3 vs. v6.0 | HCP |
| LH_supramarginal_thickavg    | ICC2 | 0.7904 | 16.62   | 34 | 34 | 3.17E-13 | 0.304  | 0.913 | v5.3 vs. v7.1 | HCP |
| LH_supramarginal_thickavg    | ICC3 | 0.9514 | 40.14   | 34 | 34 | 2.90E-19 | 0.915  | 0.972 | v6.0          | HCP |
| LH_supramarginal_thickavg    | ICC2 | 0.7917 | 39.96   | 34 | 34 | 3.13E-19 | 0.009  | 0.932 | v6.0 vs. v7.1 | HCP |
| LH_supramarginal_thickavg    | ICC3 | 0.9441 | 34.75   | 34 | 34 | 2.99E-18 | 0.903  | 0.968 | v7.1          | HCP |
| LH_SurfArea                  | ICC3 | 0.9984 | 1250.12 | 34 | 34 | 2.56E-44 | 0.997  | 0.999 | v5.3          | HCP |
| LH_SurfArea                  | ICC2 | 0.9943 | 1331.75 | 34 | 34 | 8.74E-45 | 0.869  | 0.998 | v5.3 vs. v6.0 | HCP |
| LH_SurfArea                  | ICC2 | 0.9797 | 1075.59 | 34 | 34 | 3.28E-43 | 0.295  | 0.995 | v5.3 vs. v7.1 | HCP |
| LH_SurfArea                  | ICC3 | 0.9982 | 1088.05 | 34 | 34 | 2.70E-43 | 0.997  | 0.999 | v6.0          | HCP |
| LH_SurfArea                  | ICC2 | 0.9942 | 2822.78 | 34 | 34 | 2.52E-50 | 0.677  | 0.998 | v6.0 vs. v7.1 | HCP |
| LH_SurfArea                  | ICC3 | 0.9985 | 1318.29 | 34 | 34 | 1.04E-44 | 0.997  | 0.999 | v7.1          | HCP |
| LH_temporalpole_surfavg      | ICC3 | 0.8467 | 12.05   | 34 | 34 | 3.81E-11 | 0.744  | 0.911 | v5.3          | HCP |
| LH_temporalpole_surfavg      | ICC2 | 0.7107 | 5.88    | 34 | 34 | 6.44E-07 | 0.540  | 0.825 | v5.3 vs. v6.0 | HCP |
| LH_temporalpole_surfavg      | ICC2 | 0.6852 | 7.10    | 34 | 34 | 5.86E-08 | 0.400  | 0.829 | v5.3 vs. v7.1 | HCP |
| LH_temporalpole_surfavg      | ICC3 | 0.8260 | 10.50   | 34 | 34 | 2.78E-10 | 0.711  | 0.898 | v6.0          | HCP |



|                                |      |        |       |    |    |          |        |       |               |     |
|--------------------------------|------|--------|-------|----|----|----------|--------|-------|---------------|-----|
| LH_temporalpole_surfav         | ICC2 | 0.7848 | 11.51 | 34 | 34 | 7.42E-11 | 0.528  | 0.891 | v6.0 vs. v7.1 | HCP |
| LH_temporalpole_surfav         | ICC3 | 0.8497 | 12.31 | 34 | 34 | 2.79E-11 | 0.748  | 0.912 | v7.1          | HCP |
| LH_temporalpole_thickavg       | ICC3 | 0.6975 | 5.61  | 34 | 34 | 1.14E-06 | 0.520  | 0.817 | v5.3          | HCP |
| LH_temporalpole_thickavg       | ICC2 | 0.8544 | 13.56 | 34 | 34 | 6.71E-12 | 0.753  | 0.916 | v5.3 vs. v6.0 | HCP |
| LH_temporalpole_thickavg       | ICC2 | 0.7053 | 9.29  | 34 | 34 | 1.54E-09 | 0.299  | 0.859 | v5.3 vs. v7.1 | HCP |
| LH_temporalpole_thickavg       | ICC3 | 0.8435 | 11.78 | 34 | 34 | 5.27E-11 | 0.739  | 0.909 | v6.0          | HCP |
| LH_temporalpole_thickavg       | ICC2 | 0.8389 | 18.17 | 34 | 34 | 8.13E-14 | 0.542  | 0.927 | v6.0 vs. v7.1 | HCP |
| LH_temporalpole_thickavg       | ICC3 | 0.7749 | 7.88  | 34 | 34 | 1.45E-08 | 0.633  | 0.866 | v7.1          | HCP |
| LH_Thalamus                    | ICC3 | 0.9007 | 19.13 | 34 | 34 | 3.69E-14 | 0.830  | 0.943 | v5.3          | HCP |
| LH_Thalamus                    | ICC2 | 0.7799 | 14.94 | 34 | 34 | 1.60E-12 | 0.321  | 0.906 | v5.3 vs. v6.0 | HCP |
| LH_Thalamus                    | ICC2 | 0.7488 | 11.62 | 34 | 34 | 6.49E-11 | 0.339  | 0.885 | v5.3 vs. v7.1 | HCP |
| LH_Thalamus                    | ICC3 | 0.8684 | 14.20 | 34 | 34 | 3.41E-12 | 0.778  | 0.924 | v6.0          | HCP |
| LH_Thalamus                    | ICC2 | 0.8858 | 16.13 | 34 | 34 | 5.02E-13 | 0.806  | 0.934 | v6.0 vs. v7.1 | HCP |
| LH_Thalamus                    | ICC3 | 0.8611 | 13.40 | 34 | 34 | 8.05E-12 | 0.766  | 0.919 | v7.1          | HCP |
| LH_Thickness                   | ICC3 | 0.9411 | 32.95 | 34 | 34 | 7.02E-18 | 0.898  | 0.966 | v5.3          | HCP |
| LH_Thickness                   | ICC2 | 0.9561 | 58.15 | 34 | 34 | 6.79E-22 | 0.898  | 0.978 | v5.3 vs. v6.0 | HCP |
| LH_Thickness                   | ICC2 | 0.7893 | 39.27 | 34 | 34 | 4.15E-19 | 0.008  | 0.931 | v5.3 vs. v7.1 | HCP |
| LH_Thickness                   | ICC3 | 0.9279 | 26.74 | 34 | 34 | 1.96E-16 | 0.876  | 0.959 | v6.0          | HCP |
| LH_Thickness                   | ICC2 | 0.7212 | 77.19 | 34 | 34 | 6.30E-24 | -0.011 | 0.911 | v6.0 vs. v7.1 | HCP |
| LH_Thickness                   | ICC3 | 0.9480 | 37.43 | 34 | 34 | 9.00E-19 | 0.910  | 0.970 | v7.1          | HCP |
| LH_transversetemporal_surfav   | ICC3 | 0.9494 | 38.56 | 34 | 34 | 5.58E-19 | 0.912  | 0.971 | v5.3          | HCP |
| LH_transversetemporal_surfav   | ICC2 | 0.8469 | 12.81 | 34 | 34 | 1.56E-11 | 0.742  | 0.911 | v5.3 vs. v6.0 | HCP |
| LH_transversetemporal_surfav   | ICC2 | 0.8442 | 11.74 | 34 | 34 | 5.57E-11 | 0.741  | 0.909 | v5.3 vs. v7.1 | HCP |
| LH_transversetemporal_surfav   | ICC3 | 0.9318 | 28.34 | 34 | 34 | 7.83E-17 | 0.882  | 0.961 | v6.0          | HCP |
| LH_transversetemporal_surfav   | ICC2 | 0.9061 | 33.82 | 34 | 34 | 4.63E-18 | 0.679  | 0.960 | v6.0 vs. v7.1 | HCP |
| LH_transversetemporal_surfav   | ICC3 | 0.9006 | 19.13 | 34 | 34 | 3.70E-14 | 0.830  | 0.943 | v7.1          | HCP |
| LH_transversetemporal_thickavg | ICC3 | 0.7826 | 8.20  | 34 | 34 | 8.55E-09 | 0.645  | 0.871 | v5.3          | HCP |
| LH_transversetemporal_thickavg | ICC2 | 0.8974 | 18.17 | 34 | 34 | 8.16E-14 | 0.825  | 0.941 | v5.3 vs. v6.0 | HCP |
| LH_transversetemporal_thickavg | ICC2 | 0.8485 | 14.09 | 34 | 34 | 3.80E-12 | 0.726  | 0.915 | v5.3 vs. v7.1 | HCP |
| LH_transversetemporal_thickavg | ICC3 | 0.8981 | 18.62 | 34 | 34 | 5.59E-14 | 0.826  | 0.941 | v6.0          | HCP |
| LH_transversetemporal_thickavg | ICC2 | 0.8882 | 23.83 | 34 | 34 | 1.21E-15 | 0.721  | 0.946 | v6.0 vs. v7.1 | HCP |
| LH_transversetemporal_thickavg | ICC3 | 0.8766 | 15.20 | 34 | 34 | 1.22E-12 | 0.791  | 0.928 | v7.1          | HCP |
| RH_Accumbens                   | ICC3 | 0.8429 | 11.73 | 34 | 34 | 5.64E-11 | 0.737  | 0.908 | v5.3          | HCP |
| RH_Accumbens                   | ICC2 | 0.8328 | 11.09 | 34 | 34 | 1.26E-10 | 0.723  | 0.902 | v5.3 vs. v6.0 | HCP |
| RH_Accumbens                   | ICC2 | 0.8295 | 10.46 | 34 | 34 | 2.93E-10 | 0.716  | 0.900 | v5.3 vs. v7.1 | HCP |
| RH_Accumbens                   | ICC3 | 0.8713 | 14.54 | 34 | 34 | 2.39E-12 | 0.783  | 0.925 | v6.0          | HCP |
| RH_Accumbens                   | ICC2 | 0.8927 | 18.51 | 34 | 34 | 6.13E-14 | 0.817  | 0.938 | v6.0 vs. v7.1 | HCP |
| RH_Accumbens                   | ICC3 | 0.8760 | 15.12 | 34 | 34 | 1.32E-12 | 0.790  | 0.928 | v7.1          | HCP |
| RH_Amygdala                    | ICC3 | 0.7972 | 8.86  | 34 | 34 | 2.98E-09 | 0.667  | 0.880 | v5.3          | HCP |
| RH_Amygdala                    | ICC2 | 0.6565 | 17.31 | 34 | 34 | 1.71E-13 | -0.029 | 0.869 | v5.3 vs. v6.0 | HCP |
| RH_Amygdala                    | ICC2 | 0.6662 | 18.84 | 34 | 34 | 4.69E-14 | -0.029 | 0.875 | v5.3 vs. v7.1 | HCP |
| RH_Amygdala                    | ICC3 | 0.9168 | 23.04 | 34 | 34 | 2.06E-15 | 0.857  | 0.952 | v6.0          | HCP |
| RH_Amygdala                    | ICC2 | 0.9438 | 34.65 | 34 | 34 | 3.13E-18 | 0.903  | 0.968 | v6.0 vs. v7.1 | HCP |
| RH_Amygdala                    | ICC3 | 0.9344 | 29.49 | 34 | 34 | 4.15E-17 | 0.887  | 0.962 | v7.1          | HCP |

|                                     |      |        |        |    |    |          |        |       |               |     |
|-------------------------------------|------|--------|--------|----|----|----------|--------|-------|---------------|-----|
| RH_bankssts_surfavg                 | ICC3 | 0.9703 | 66.28  | 34 | 34 | 7.85E-23 | 0.948  | 0.983 | v5.3          | HCP |
| RH_bankssts_surfavg                 | ICC2 | 0.7571 | 10.70  | 34 | 34 | 2.12E-10 | 0.438  | 0.881 | v5.3 vs. v6.0 | HCP |
| RH_bankssts_surfavg                 | ICC2 | 0.7652 | 9.62   | 34 | 34 | 9.51E-10 | 0.544  | 0.874 | v5.3 vs. v7.1 | HCP |
| RH_bankssts_surfavg                 | ICC3 | 0.9724 | 71.54  | 34 | 34 | 2.22E-23 | 0.952  | 0.984 | v6.0          | HCP |
| RH_bankssts_surfavg                 | ICC2 | 0.9689 | 67.39  | 34 | 34 | 5.97E-23 | 0.945  | 0.982 | v6.0 vs. v7.1 | HCP |
| RH_bankssts_surfavg                 | ICC3 | 0.9843 | 126.18 | 34 | 34 | 1.74E-27 | 0.972  | 0.991 | v7.1          | HCP |
| RH_bankssts_thickavg                | ICC3 | 0.9406 | 32.68  | 34 | 34 | 8.00E-18 | 0.897  | 0.966 | v5.3          | HCP |
| RH_bankssts_thickavg                | ICC2 | 0.9329 | 29.06  | 34 | 34 | 5.25E-17 | 0.885  | 0.961 | v5.3 vs. v6.0 | HCP |
| RH_bankssts_thickavg                | ICC2 | 0.8222 | 24.26  | 34 | 34 | 9.15E-16 | 0.240  | 0.933 | v5.3 vs. v7.1 | HCP |
| RH_bankssts_thickavg                | ICC3 | 0.9506 | 39.46  | 34 | 34 | 3.83E-19 | 0.914  | 0.972 | v6.0          | HCP |
| RH_bankssts_thickavg                | ICC2 | 0.8664 | 41.55  | 34 | 34 | 1.66E-19 | 0.209  | 0.954 | v6.0 vs. v7.1 | HCP |
| RH_bankssts_thickavg                | ICC3 | 0.9513 | 40.10  | 34 | 34 | 2.96E-19 | 0.915  | 0.972 | v7.1          | HCP |
| RH_caudalanteriorcingulate_surfavg  | ICC3 | 0.9664 | 58.57  | 34 | 34 | 6.04E-22 | 0.941  | 0.981 | v5.3          | HCP |
| RH_caudalanteriorcingulate_surfavg  | ICC2 | 0.8011 | 31.84  | 34 | 34 | 1.22E-17 | 0.055  | 0.932 | v5.3 vs. v6.0 | HCP |
| RH_caudalanteriorcingulate_surfavg  | ICC2 | 0.9083 | 36.22  | 34 | 34 | 1.53E-18 | 0.661  | 0.962 | v5.3 vs. v7.1 | HCP |
| RH_caudalanteriorcingulate_surfavg  | ICC3 | 0.9775 | 87.83  | 34 | 34 | 7.37E-25 | 0.960  | 0.987 | v6.0          | HCP |
| RH_caudalanteriorcingulate_surfavg  | ICC2 | 0.9399 | 96.99  | 34 | 34 | 1.41E-25 | 0.451  | 0.980 | v6.0 vs. v7.1 | HCP |
| RH_caudalanteriorcingulate_surfavg  | ICC3 | 0.9639 | 54.44  | 34 | 34 | 2.01E-21 | 0.937  | 0.979 | v7.1          | HCP |
| RH_caudalanteriorcingulate_thickavg | ICC3 | 0.7110 | 5.92   | 34 | 34 | 5.87E-07 | 0.539  | 0.826 | v5.3          | HCP |
| RH_caudalanteriorcingulate_thickavg | ICC2 | 0.7331 | 6.45   | 34 | 34 | 2.01E-07 | 0.573  | 0.840 | v5.3 vs. v6.0 | HCP |
| RH_caudalanteriorcingulate_thickavg | ICC2 | 0.4013 | 6.09   | 34 | 34 | 4.11E-07 | -0.065 | 0.697 | v5.3 vs. v7.1 | HCP |
| RH_caudalanteriorcingulate_thickavg | ICC3 | 0.8082 | 9.43   | 34 | 34 | 1.25E-09 | 0.684  | 0.887 | v6.0          | HCP |
| RH_caudalanteriorcingulate_thickavg | ICC2 | 0.4085 | 7.33   | 34 | 34 | 3.86E-08 | -0.064 | 0.710 | v6.0 vs. v7.1 | HCP |
| RH_caudalanteriorcingulate_thickavg | ICC3 | 0.7790 | 8.05   | 34 | 34 | 1.09E-08 | 0.639  | 0.869 | v7.1          | HCP |
| RH_caudalmiddlefrontal_surfavg      | ICC3 | 0.9881 | 167.66 | 34 | 34 | 1.47E-29 | 0.979  | 0.993 | v5.3          | HCP |
| RH_caudalmiddlefrontal_surfavg      | ICC2 | 0.9741 | 92.19  | 34 | 34 | 3.29E-25 | 0.946  | 0.986 | v5.3 vs. v6.0 | HCP |
| RH_caudalmiddlefrontal_surfavg      | ICC2 | 0.9679 | 62.92  | 34 | 34 | 1.85E-22 | 0.944  | 0.982 | v5.3 vs. v7.1 | HCP |
| RH_caudalmiddlefrontal_surfavg      | ICC3 | 0.9936 | 312.82 | 34 | 34 | 4.00E-34 | 0.989  | 0.996 | v6.0          | HCP |
| RH_caudalmiddlefrontal_surfavg      | ICC2 | 0.9921 | 274.76 | 34 | 34 | 3.58E-33 | 0.986  | 0.996 | v6.0 vs. v7.1 | HCP |
| RH_caudalmiddlefrontal_surfavg      | ICC3 | 0.9942 | 343.94 | 34 | 34 | 8.06E-35 | 0.990  | 0.997 | v7.1          | HCP |
| RH_caudalmiddlefrontal_thickavg     | ICC3 | 0.8646 | 13.77  | 34 | 34 | 5.38E-12 | 0.772  | 0.921 | v5.3          | HCP |
| RH_caudalmiddlefrontal_thickavg     | ICC2 | 0.9099 | 27.84  | 34 | 34 | 1.04E-16 | 0.796  | 0.955 | v5.3 vs. v6.0 | HCP |
| RH_caudalmiddlefrontal_thickavg     | ICC2 | 0.8187 | 16.33  | 34 | 34 | 4.14E-13 | 0.485  | 0.918 | v5.3 vs. v7.1 | HCP |
| RH_caudalmiddlefrontal_thickavg     | ICC3 | 0.8937 | 17.82  | 34 | 34 | 1.10E-13 | 0.819  | 0.939 | v6.0          | HCP |
| RH_caudalmiddlefrontal_thickavg     | ICC2 | 0.7752 | 37.99  | 34 | 34 | 7.09E-19 | -0.001 | 0.926 | v6.0 vs. v7.1 | HCP |
| RH_caudalmiddlefrontal_thickavg     | ICC3 | 0.9117 | 21.64  | 34 | 34 | 5.47E-15 | 0.849  | 0.949 | v7.1          | HCP |
| RH_Caudate                          | ICC3 | 0.9602 | 49.25  | 34 | 34 | 1.04E-20 | 0.931  | 0.977 | v5.3          | HCP |
| RH_Caudate                          | ICC2 | 0.7455 | 36.64  | 34 | 34 | 1.27E-18 | -0.016 | 0.915 | v5.3 vs. v6.0 | HCP |
| RH_Caudate                          | ICC2 | 0.7597 | 33.38  | 34 | 34 | 5.70E-18 | -0.005 | 0.919 | v5.3 vs. v7.1 | HCP |
| RH_Caudate                          | ICC3 | 0.9828 | 115.26 | 34 | 34 | 7.91E-27 | 0.970  | 0.990 | v6.0          | HCP |
| RH_Caudate                          | ICC2 | 0.9783 | 96.03  | 34 | 34 | 1.67E-25 | 0.961  | 0.988 | v6.0 vs. v7.1 | HCP |
| RH_Caudate                          | ICC3 | 0.9733 | 73.85  | 34 | 34 | 1.31E-23 | 0.953  | 0.985 | v7.1          | HCP |
| RH_cuneus_surfavg                   | ICC3 | 0.9552 | 43.61  | 34 | 34 | 7.54E-20 | 0.922  | 0.974 | v5.3          | HCP |
| RH_cuneus_surfavg                   | ICC2 | 0.6406 | 6.96   | 34 | 34 | 7.55E-08 | 0.247  | 0.817 | v5.3 vs. v6.0 | HCP |

|                         |      |        |        |    |    |          |        |       |               |     |
|-------------------------|------|--------|--------|----|----|----------|--------|-------|---------------|-----|
| RH_cuneus_surfavg       | ICC2 | 0.5806 | 6.78   | 34 | 34 | 1.05E-07 | 0.086  | 0.796 | v5.3 vs. v7.1 | HCP |
| RH_cuneus_surfavg       | ICC3 | 0.9874 | 158.06 | 34 | 34 | 3.97E-29 | 0.978  | 0.993 | v6.0          | HCP |
| RH_cuneus_surfavg       | ICC2 | 0.9787 | 176.22 | 34 | 34 | 6.39E-30 | 0.889  | 0.992 | v6.0 vs. v7.1 | HCP |
| RH_cuneus_surfavg       | ICC3 | 0.9834 | 119.76 | 34 | 34 | 4.17E-27 | 0.971  | 0.991 | v7.1          | HCP |
| RH_cuneus_thickavg      | ICC3 | 0.9218 | 24.56  | 34 | 34 | 7.52E-16 | 0.865  | 0.955 | v5.3          | HCP |
| RH_cuneus_thickavg      | ICC2 | 0.8491 | 17.36  | 34 | 34 | 1.64E-13 | 0.636  | 0.927 | v5.3 vs. v6.0 | HCP |
| RH_cuneus_thickavg      | ICC2 | 0.8816 | 17.59  | 34 | 34 | 1.34E-13 | 0.791  | 0.933 | v5.3 vs. v7.1 | HCP |
| RH_cuneus_thickavg      | ICC3 | 0.9314 | 28.17  | 34 | 34 | 8.60E-17 | 0.882  | 0.961 | v6.0          | HCP |
| RH_cuneus_thickavg      | ICC2 | 0.8299 | 30.62  | 34 | 34 | 2.28E-17 | 0.160  | 0.940 | v6.0 vs. v7.1 | HCP |
| RH_cuneus_thickavg      | ICC3 | 0.9483 | 37.66  | 34 | 34 | 8.16E-19 | 0.910  | 0.970 | v7.1          | HCP |
| RH_entorhinal_surfavg   | ICC3 | 0.8685 | 14.21  | 34 | 34 | 3.35E-12 | 0.778  | 0.924 | v5.3          | HCP |
| RH_entorhinal_surfavg   | ICC2 | 0.7926 | 11.01  | 34 | 34 | 1.40E-10 | 0.591  | 0.889 | v5.3 vs. v6.0 | HCP |
| RH_entorhinal_surfavg   | ICC2 | 0.7730 | 8.92   | 34 | 34 | 2.71E-09 | 0.609  | 0.869 | v5.3 vs. v7.1 | HCP |
| RH_entorhinal_surfavg   | ICC3 | 0.9179 | 23.36  | 34 | 34 | 1.65E-15 | 0.859  | 0.953 | v6.0          | HCP |
| RH_entorhinal_surfavg   | ICC2 | 0.9510 | 40.69  | 34 | 34 | 2.33E-19 | 0.915  | 0.972 | v6.0 vs. v7.1 | HCP |
| RH_entorhinal_surfavg   | ICC3 | 0.9209 | 24.29  | 34 | 34 | 8.98E-16 | 0.864  | 0.955 | v7.1          | HCP |
| RH_entorhinal_thickavg  | ICC3 | 0.8303 | 10.79  | 34 | 34 | 1.88E-10 | 0.718  | 0.901 | v5.3          | HCP |
| RH_entorhinal_thickavg  | ICC2 | 0.9082 | 22.66  | 34 | 34 | 2.67E-15 | 0.838  | 0.948 | v5.3 vs. v6.0 | HCP |
| RH_entorhinal_thickavg  | ICC2 | 0.5461 | 12.79  | 34 | 34 | 1.58E-11 | -0.052 | 0.812 | v5.3 vs. v7.1 | HCP |
| RH_entorhinal_thickavg  | ICC3 | 0.8623 | 13.53  | 34 | 34 | 6.97E-12 | 0.768  | 0.920 | v6.0          | HCP |
| RH_entorhinal_thickavg  | ICC2 | 0.6293 | 27.19  | 34 | 34 | 1.51E-16 | -0.034 | 0.865 | v6.0 vs. v7.1 | HCP |
| RH_entorhinal_thickavg  | ICC3 | 0.8587 | 13.15  | 34 | 34 | 1.05E-11 | 0.763  | 0.918 | v7.1          | HCP |
| RH_frontalpole_surfavg  | ICC3 | 0.8359 | 11.19  | 34 | 34 | 1.11E-10 | 0.727  | 0.904 | v5.3          | HCP |
| RH_frontalpole_surfavg  | ICC2 | 0.5029 | 7.34   | 34 | 34 | 3.75E-08 | -0.042 | 0.767 | v5.3 vs. v6.0 | HCP |
| RH_frontalpole_surfavg  | ICC2 | 0.2986 | 7.02   | 34 | 34 | 6.68E-08 | -0.053 | 0.616 | v5.3 vs. v7.1 | HCP |
| RH_frontalpole_surfavg  | ICC3 | 0.7594 | 7.31   | 34 | 34 | 3.94E-08 | 0.610  | 0.857 | v6.0          | HCP |
| RH_frontalpole_surfavg  | ICC2 | 0.5636 | 5.95   | 34 | 34 | 5.53E-07 | 0.111  | 0.778 | v6.0 vs. v7.1 | HCP |
| RH_frontalpole_surfavg  | ICC3 | 0.7833 | 8.23   | 34 | 34 | 8.16E-09 | 0.646  | 0.872 | v7.1          | HCP |
| RH_frontalpole_thickavg | ICC3 | 0.8185 | 10.02  | 34 | 34 | 5.38E-10 | 0.699  | 0.893 | v5.3          | HCP |
| RH_frontalpole_thickavg | ICC2 | 0.8008 | 9.58   | 34 | 34 | 1.01E-09 | 0.670  | 0.883 | v5.3 vs. v6.0 | HCP |
| RH_frontalpole_thickavg | ICC2 | 0.6731 | 7.70   | 34 | 34 | 1.99E-08 | 0.298  | 0.835 | v5.3 vs. v7.1 | HCP |
| RH_frontalpole_thickavg | ICC3 | 0.8227 | 10.28  | 34 | 34 | 3.73E-10 | 0.706  | 0.896 | v6.0          | HCP |
| RH_frontalpole_thickavg | ICC2 | 0.8271 | 17.89  | 34 | 34 | 1.03E-13 | 0.475  | 0.924 | v6.0 vs. v7.1 | HCP |
| RH_frontalpole_thickavg | ICC3 | 0.8525 | 12.56  | 34 | 34 | 2.08E-11 | 0.753  | 0.914 | v7.1          | HCP |
| RH_fusiform_surfavg     | ICC3 | 0.9717 | 69.60  | 34 | 34 | 3.50E-23 | 0.950  | 0.984 | v5.3          | HCP |
| RH_fusiform_surfavg     | ICC2 | 0.8903 | 32.35  | 34 | 34 | 9.45E-18 | 0.561  | 0.956 | v5.3 vs. v6.0 | HCP |
| RH_fusiform_surfavg     | ICC2 | 0.8947 | 26.31  | 34 | 34 | 2.54E-16 | 0.719  | 0.951 | v5.3 vs. v7.1 | HCP |
| RH_fusiform_surfavg     | ICC3 | 0.9915 | 235.53 | 34 | 34 | 4.82E-32 | 0.985  | 0.995 | v6.0          | HCP |
| RH_fusiform_surfavg     | ICC2 | 0.9885 | 212.23 | 34 | 34 | 2.79E-31 | 0.975  | 0.994 | v6.0 vs. v7.1 | HCP |
| RH_fusiform_surfavg     | ICC3 | 0.9914 | 230.89 | 34 | 34 | 6.74E-32 | 0.985  | 0.995 | v7.1          | HCP |
| RH_fusiform_thickavg    | ICC3 | 0.8950 | 18.04  | 34 | 34 | 9.09E-14 | 0.821  | 0.939 | v5.3          | HCP |
| RH_fusiform_thickavg    | ICC2 | 0.8997 | 18.48  | 34 | 34 | 6.32E-14 | 0.829  | 0.942 | v5.3 vs. v6.0 | HCP |
| RH_fusiform_thickavg    | ICC2 | 0.7391 | 25.03  | 34 | 34 | 5.60E-16 | 0.001  | 0.908 | v5.3 vs. v7.1 | HCP |
| RH_fusiform_thickavg    | ICC3 | 0.9105 | 21.34  | 34 | 34 | 6.79E-15 | 0.847  | 0.948 | v6.0          | HCP |

|                              |      |        |        |    |    |          |        |       |               |     |
|------------------------------|------|--------|--------|----|----|----------|--------|-------|---------------|-----|
| RH_fusiform_thickavg         | ICC2 | 0.7341 | 44.69  | 34 | 34 | 5.07E-20 | -0.019 | 0.913 | v6.0 vs. v7.1 | HCP |
| RH_fusiform_thickavg         | ICC3 | 0.9288 | 27.08  | 34 | 34 | 1.61E-16 | 0.877  | 0.959 | v7.1          | HCP |
| RH_Hippocampus               | ICC3 | 0.4952 | 2.96   | 34 | 34 | 1.07E-03 | 0.251  | 0.680 | v5.3          | HCP |
| RH_Hippocampus               | ICC2 | 0.9547 | 54.81  | 34 | 34 | 1.80E-21 | 0.899  | 0.977 | v5.3 vs. v6.0 | HCP |
| RH_Hippocampus               | ICC2 | 0.9650 | 54.90  | 34 | 34 | 1.75E-21 | 0.939  | 0.980 | v5.3 vs. v7.1 | HCP |
| RH_Hippocampus               | ICC3 | 0.9656 | 57.10  | 34 | 34 | 9.16E-22 | 0.940  | 0.980 | v6.0          | HCP |
| RH_Hippocampus               | ICC2 | 0.9633 | 66.08  | 34 | 34 | 8.24E-23 | 0.922  | 0.981 | v6.0 vs. v7.1 | HCP |
| RH_Hippocampus               | ICC3 | 0.9719 | 70.05  | 34 | 34 | 3.14E-23 | 0.951  | 0.984 | v7.1          | HCP |
| RH_inferiorparietal_surfavg  | ICC3 | 0.9882 | 169.19 | 34 | 34 | 1.27E-29 | 0.979  | 0.993 | v5.3          | HCP |
| RH_inferiorparietal_surfavg  | ICC2 | 0.8839 | 20.00  | 34 | 34 | 1.86E-14 | 0.767  | 0.938 | v5.3 vs. v6.0 | HCP |
| RH_inferiorparietal_surfavg  | ICC2 | 0.8957 | 18.93  | 34 | 34 | 4.34E-14 | 0.822  | 0.940 | v5.3 vs. v7.1 | HCP |
| RH_inferiorparietal_surfavg  | ICC3 | 0.9957 | 465.07 | 34 | 34 | 4.89E-37 | 0.992  | 0.998 | v6.0          | HCP |
| RH_inferiorparietal_surfavg  | ICC2 | 0.9903 | 383.89 | 34 | 34 | 1.26E-35 | 0.950  | 0.996 | v6.0 vs. v7.1 | HCP |
| RH_inferiorparietal_surfavg  | ICC3 | 0.9960 | 498.97 | 34 | 34 | 1.49E-37 | 0.993  | 0.998 | v7.1          | HCP |
| RH_inferiorparietal_thickavg | ICC3 | 0.9206 | 24.18  | 34 | 34 | 9.66E-16 | 0.863  | 0.954 | v5.3          | HCP |
| RH_inferiorparietal_thickavg | ICC2 | 0.9427 | 35.27  | 34 | 34 | 2.35E-18 | 0.900  | 0.967 | v5.3 vs. v6.0 | HCP |
| RH_inferiorparietal_thickavg | ICC2 | 0.7481 | 22.77  | 34 | 34 | 2.48E-15 | 0.025  | 0.909 | v5.3 vs. v7.1 | HCP |
| RH_inferiorparietal_thickavg | ICC3 | 0.9467 | 36.54  | 34 | 34 | 1.33E-18 | 0.907  | 0.970 | v6.0          | HCP |
| RH_inferiorparietal_thickavg | ICC2 | 0.8136 | 52.30  | 34 | 34 | 3.87E-21 | 0.012  | 0.941 | v6.0 vs. v7.1 | HCP |
| RH_inferiorparietal_thickavg | ICC3 | 0.9283 | 26.88  | 34 | 34 | 1.81E-16 | 0.876  | 0.959 | v7.1          | HCP |
| RH_inferiortemporal_surfavg  | ICC3 | 0.9899 | 196.38 | 34 | 34 | 1.03E-30 | 0.982  | 0.994 | v5.3          | HCP |
| RH_inferiortemporal_surfavg  | ICC2 | 0.9359 | 56.39  | 34 | 34 | 1.13E-21 | 0.713  | 0.975 | v5.3 vs. v6.0 | HCP |
| RH_inferiortemporal_surfavg  | ICC2 | 0.9182 | 57.19  | 34 | 34 | 8.93E-22 | 0.483  | 0.971 | v5.3 vs. v7.1 | HCP |
| RH_inferiortemporal_surfavg  | ICC3 | 0.9854 | 135.60 | 34 | 34 | 5.20E-28 | 0.974  | 0.992 | v6.0          | HCP |
| RH_inferiortemporal_surfavg  | ICC2 | 0.9859 | 157.72 | 34 | 34 | 4.12E-29 | 0.974  | 0.992 | v6.0 vs. v7.1 | HCP |
| RH_inferiortemporal_surfavg  | ICC3 | 0.9854 | 135.68 | 34 | 34 | 5.15E-28 | 0.974  | 0.992 | v7.1          | HCP |
| RH_inferiortemporal_thickavg | ICC3 | 0.8965 | 18.32  | 34 | 34 | 7.17E-14 | 0.824  | 0.940 | v5.3          | HCP |
| RH_inferiortemporal_thickavg | ICC2 | 0.8879 | 25.23  | 34 | 34 | 4.93E-16 | 0.690  | 0.948 | v5.3 vs. v6.0 | HCP |
| RH_inferiortemporal_thickavg | ICC2 | 0.6050 | 16.90  | 34 | 34 | 2.47E-13 | -0.044 | 0.847 | v5.3 vs. v7.1 | HCP |
| RH_inferiortemporal_thickavg | ICC3 | 0.8837 | 16.19  | 34 | 34 | 4.73E-13 | 0.803  | 0.933 | v6.0          | HCP |
| RH_inferiortemporal_thickavg | ICC2 | 0.7566 | 32.22  | 34 | 34 | 1.01E-17 | -0.005 | 0.918 | v6.0 vs. v7.1 | HCP |
| RH_inferiortemporal_thickavg | ICC3 | 0.9141 | 22.28  | 34 | 34 | 3.48E-15 | 0.853  | 0.951 | v7.1          | HCP |
| RH_insula_surfavg            | ICC3 | 0.6465 | 4.66   | 34 | 34 | 1.02E-05 | 0.449  | 0.784 | v5.3          | HCP |
| RH_insula_surfavg            | ICC2 | 0.7585 | 7.11   | 34 | 34 | 5.70E-08 | 0.608  | 0.856 | v5.3 vs. v6.0 | HCP |
| RH_insula_surfavg            | ICC2 | 0.7979 | 10.13  | 34 | 34 | 4.60E-10 | 0.648  | 0.884 | v5.3 vs. v7.1 | HCP |
| RH_insula_surfavg            | ICC3 | 0.7642 | 7.48   | 34 | 34 | 2.91E-08 | 0.617  | 0.860 | v6.0          | HCP |
| RH_insula_surfavg            | ICC2 | 0.8154 | 11.09  | 34 | 34 | 1.26E-10 | 0.679  | 0.894 | v6.0 vs. v7.1 | HCP |
| RH_insula_surfavg            | ICC3 | 0.8694 | 14.32  | 34 | 34 | 3.00E-12 | 0.780  | 0.924 | v7.1          | HCP |
| RH_insula_thickavg           | ICC3 | 0.7533 | 7.11   | 34 | 34 | 5.74E-08 | 0.601  | 0.853 | v5.3          | HCP |
| RH_insula_thickavg           | ICC2 | 0.7624 | 8.32   | 34 | 34 | 6.98E-09 | 0.599  | 0.862 | v5.3 vs. v6.0 | HCP |
| RH_insula_thickavg           | ICC2 | 0.7950 | 10.18  | 34 | 34 | 4.30E-10 | 0.636  | 0.884 | v5.3 vs. v7.1 | HCP |
| RH_insula_thickavg           | ICC3 | 0.8159 | 9.86   | 34 | 34 | 6.69E-10 | 0.695  | 0.892 | v6.0          | HCP |
| RH_insula_thickavg           | ICC2 | 0.6832 | 7.77   | 34 | 34 | 1.76E-08 | 0.331  | 0.838 | v6.0 vs. v7.1 | HCP |
| RH_insula_thickavg           | ICC3 | 0.8297 | 10.74  | 34 | 34 | 1.99E-10 | 0.717  | 0.900 | v7.1          | HCP |

|                                  |      |        |         |    |    |          |        |       |               |     |
|----------------------------------|------|--------|---------|----|----|----------|--------|-------|---------------|-----|
| RH_isthmuscingulate_surfavg      | ICC3 | 0.9134 | 22.09   | 34 | 34 | 3.96E-15 | 0.851  | 0.950 | v5.3          | HCP |
| RH_isthmuscingulate_surfavg      | ICC2 | 0.8491 | 14.90   | 34 | 34 | 1.65E-12 | 0.709  | 0.918 | v5.3 vs. v6.0 | HCP |
| RH_isthmuscingulate_surfavg      | ICC2 | 0.8501 | 12.41   | 34 | 34 | 2.49E-11 | 0.750  | 0.912 | v5.3 vs. v7.1 | HCP |
| RH_isthmuscingulate_surfavg      | ICC3 | 0.9788 | 93.19   | 34 | 34 | 2.75E-25 | 0.963  | 0.988 | v6.0          | HCP |
| RH_isthmuscingulate_surfavg      | ICC2 | 0.9661 | 87.11   | 34 | 34 | 8.45E-25 | 0.895  | 0.985 | v6.0 vs. v7.1 | HCP |
| RH_isthmuscingulate_surfavg      | ICC3 | 0.9766 | 84.55   | 34 | 34 | 1.39E-24 | 0.959  | 0.987 | v7.1          | HCP |
| RH_isthmuscingulate_thickavg     | ICC3 | 0.8842 | 16.28   | 34 | 34 | 4.37E-13 | 0.804  | 0.933 | v5.3          | HCP |
| RH_isthmuscingulate_thickavg     | ICC2 | 0.8144 | 9.96    | 34 | 34 | 5.81E-10 | 0.695  | 0.891 | v5.3 vs. v6.0 | HCP |
| RH_isthmuscingulate_thickavg     | ICC2 | 0.3545 | 7.77    | 34 | 34 | 1.78E-08 | -0.058 | 0.671 | v5.3 vs. v7.1 | HCP |
| RH_isthmuscingulate_thickavg     | ICC3 | 0.8640 | 13.71   | 34 | 34 | 5.73E-12 | 0.771  | 0.921 | v6.0          | HCP |
| RH_isthmuscingulate_thickavg     | ICC2 | 0.4274 | 18.38   | 34 | 34 | 6.86E-14 | -0.033 | 0.745 | v6.0 vs. v7.1 | HCP |
| RH_isthmuscingulate_thickavg     | ICC3 | 0.9248 | 25.58   | 34 | 34 | 3.95E-16 | 0.870  | 0.957 | v7.1          | HCP |
| RH_lateraloccipital_surfavg      | ICC3 | 0.9589 | 47.61   | 34 | 34 | 1.80E-20 | 0.928  | 0.977 | v5.3          | HCP |
| RH_lateraloccipital_surfavg      | ICC2 | 0.7089 | 8.79    | 34 | 34 | 3.31E-09 | 0.353  | 0.855 | v5.3 vs. v6.0 | HCP |
| RH_lateraloccipital_surfavg      | ICC2 | 0.6967 | 9.84    | 34 | 34 | 6.88E-10 | 0.226  | 0.861 | v5.3 vs. v7.1 | HCP |
| RH_lateraloccipital_surfavg      | ICC3 | 0.9933 | 295.42  | 34 | 34 | 1.05E-33 | 0.988  | 0.996 | v6.0          | HCP |
| RH_lateraloccipital_surfavg      | ICC2 | 0.9832 | 136.60  | 34 | 34 | 4.60E-28 | 0.967  | 0.991 | v6.0 vs. v7.1 | HCP |
| RH_lateraloccipital_surfavg      | ICC3 | 0.9910 | 221.42  | 34 | 34 | 1.37E-31 | 0.984  | 0.995 | v7.1          | HCP |
| RH_lateraloccipital_thickavg     | ICC3 | 0.9602 | 49.29   | 34 | 34 | 1.02E-20 | 0.931  | 0.977 | v5.3          | HCP |
| RH_lateraloccipital_thickavg     | ICC2 | 0.9481 | 44.14   | 34 | 34 | 6.20E-20 | 0.898  | 0.972 | v5.3 vs. v6.0 | HCP |
| RH_lateraloccipital_thickavg     | ICC2 | 0.8615 | 29.16   | 34 | 34 | 4.97E-17 | 0.382  | 0.947 | v5.3 vs. v7.1 | HCP |
| RH_lateraloccipital_thickavg     | ICC3 | 0.9348 | 29.66   | 34 | 34 | 3.79E-17 | 0.887  | 0.963 | v6.0          | HCP |
| RH_lateraloccipital_thickavg     | ICC2 | 0.8295 | 89.63   | 34 | 34 | 5.25E-25 | 0.006  | 0.949 | v6.0 vs. v7.1 | HCP |
| RH_lateraloccipital_thickavg     | ICC3 | 0.9647 | 55.61   | 34 | 34 | 1.42E-21 | 0.938  | 0.980 | v7.1          | HCP |
| RH_lateralorbitofrontal_surfavg  | ICC3 | 0.8552 | 12.81   | 34 | 34 | 1.55E-11 | 0.757  | 0.916 | v5.3          | HCP |
| RH_lateralorbitofrontal_surfavg  | ICC2 | 0.8779 | 15.20   | 34 | 34 | 1.22E-12 | 0.794  | 0.929 | v5.3 vs. v6.0 | HCP |
| RH_lateralorbitofrontal_surfavg  | ICC2 | 0.7900 | 10.85   | 34 | 34 | 1.72E-10 | 0.587  | 0.888 | v5.3 vs. v7.1 | HCP |
| RH_lateralorbitofrontal_surfavg  | ICC3 | 0.8316 | 10.88   | 34 | 34 | 1.67E-10 | 0.720  | 0.901 | v6.0          | HCP |
| RH_lateralorbitofrontal_surfavg  | ICC2 | 0.9066 | 30.10   | 34 | 34 | 3.00E-17 | 0.742  | 0.957 | v6.0 vs. v7.1 | HCP |
| RH_lateralorbitofrontal_surfavg  | ICC3 | 0.9022 | 19.46   | 34 | 34 | 2.85E-14 | 0.833  | 0.944 | v7.1          | HCP |
| RH_lateralorbitofrontal_thickavg | ICC3 | 0.8663 | 13.96   | 34 | 34 | 4.39E-12 | 0.775  | 0.922 | v5.3          | HCP |
| RH_lateralorbitofrontal_thickavg | ICC2 | 0.8505 | 15.86   | 34 | 34 | 6.48E-13 | 0.690  | 0.922 | v5.3 vs. v6.0 | HCP |
| RH_lateralorbitofrontal_thickavg | ICC2 | 0.7029 | 9.74    | 34 | 34 | 7.96E-10 | 0.257  | 0.862 | v5.3 vs. v7.1 | HCP |
| RH_lateralorbitofrontal_thickavg | ICC3 | 0.8530 | 12.60   | 34 | 34 | 1.98E-11 | 0.753  | 0.914 | v6.0          | HCP |
| RH_lateralorbitofrontal_thickavg | ICC2 | 0.6055 | 12.64   | 34 | 34 | 1.90E-11 | -0.035 | 0.839 | v6.0 vs. v7.1 | HCP |
| RH_lateralorbitofrontal_thickavg | ICC3 | 0.7962 | 8.82    | 34 | 34 | 3.19E-09 | 0.665  | 0.880 | v7.1          | HCP |
| RH_LateralVentricle              | ICC3 | 0.9941 | 335.36  | 34 | 34 | 1.24E-34 | 0.989  | 0.997 | v5.3          | HCP |
| RH_LateralVentricle              | ICC2 | 0.9656 | 435.79  | 34 | 34 | 1.47E-36 | 0.244  | 0.991 | v5.3 vs. v6.0 | HCP |
| RH_LateralVentricle              | ICC2 | 0.9634 | 349.75  | 34 | 34 | 6.07E-35 | 0.267  | 0.990 | v5.3 vs. v7.1 | HCP |
| RH_LateralVentricle              | ICC3 | 0.9952 | 417.76  | 34 | 34 | 3.01E-36 | 0.992  | 0.997 | v6.0          | HCP |
| RH_LateralVentricle              | ICC2 | 0.9993 | 2986.76 | 34 | 34 | 9.64E-51 | 0.999  | 1.000 | v6.0 vs. v7.1 | HCP |
| RH_LateralVentricle              | ICC3 | 0.9959 | 482.75  | 34 | 34 | 2.60E-37 | 0.993  | 0.998 | v7.1          | HCP |
| RH_lingual_surfavg               | ICC3 | 0.9739 | 75.74   | 34 | 34 | 8.63E-24 | 0.954  | 0.985 | v5.3          | HCP |
| RH_lingual_surfavg               | ICC2 | 0.7463 | 8.08    | 34 | 34 | 1.05E-08 | 0.558  | 0.855 | v5.3 vs. v6.0 | HCP |

|                                 |      |        |        |    |    |          |        |       |               |     |
|---------------------------------|------|--------|--------|----|----|----------|--------|-------|---------------|-----|
| RH_lingual_surfavg              | ICC2 | 0.7064 | 8.56   | 34 | 34 | 4.73E-09 | 0.360  | 0.852 | v5.3 vs. v7.1 | HCP |
| RH_lingual_surfavg              | ICC3 | 0.9898 | 195.93 | 34 | 34 | 1.07E-30 | 0.982  | 0.994 | v6.0          | HCP |
| RH_lingual_surfavg              | ICC2 | 0.9781 | 376.77 | 34 | 34 | 1.72E-35 | 0.573  | 0.994 | v6.0 vs. v7.1 | HCP |
| RH_lingual_surfavg              | ICC3 | 0.9912 | 226.46 | 34 | 34 | 9.35E-32 | 0.984  | 0.995 | v7.1          | HCP |
| RH_lingual_thickavg             | ICC3 | 0.9347 | 29.61  | 34 | 34 | 3.89E-17 | 0.887  | 0.963 | v5.3          | HCP |
| RH_lingual_thickavg             | ICC2 | 0.7916 | 9.26   | 34 | 34 | 1.61E-09 | 0.653  | 0.878 | v5.3 vs. v6.0 | HCP |
| RH_lingual_thickavg             | ICC2 | 0.6660 | 9.08   | 34 | 34 | 2.12E-09 | 0.166  | 0.846 | v5.3 vs. v7.1 | HCP |
| RH_lingual_thickavg             | ICC3 | 0.8906 | 17.28  | 34 | 34 | 1.76E-13 | 0.814  | 0.937 | v6.0          | HCP |
| RH_lingual_thickavg             | ICC2 | 0.6437 | 38.75  | 34 | 34 | 5.15E-19 | -0.025 | 0.875 | v6.0 vs. v7.1 | HCP |
| RH_lingual_thickavg             | ICC3 | 0.9384 | 31.48  | 34 | 34 | 1.46E-17 | 0.893  | 0.965 | v7.1          | HCP |
| RH_medialorbitofrontal_surfavg  | ICC3 | 0.9535 | 42.02  | 34 | 34 | 1.38E-19 | 0.919  | 0.973 | v5.3          | HCP |
| RH_medialorbitofrontal_surfavg  | ICC2 | 0.8286 | 16.70  | 34 | 34 | 2.97E-13 | 0.532  | 0.921 | v5.3 vs. v6.0 | HCP |
| RH_medialorbitofrontal_surfavg  | ICC2 | 0.4974 | 13.91  | 34 | 34 | 4.63E-12 | -0.050 | 0.786 | v5.3 vs. v7.1 | HCP |
| RH_medialorbitofrontal_surfavg  | ICC3 | 0.9309 | 27.96  | 34 | 34 | 9.67E-17 | 0.881  | 0.960 | v6.0          | HCP |
| RH_medialorbitofrontal_surfavg  | ICC2 | 0.6586 | 16.46  | 34 | 34 | 3.67E-13 | -0.024 | 0.869 | v6.0 vs. v7.1 | HCP |
| RH_medialorbitofrontal_surfavg  | ICC3 | 0.9470 | 36.74  | 34 | 34 | 1.22E-18 | 0.908  | 0.970 | v7.1          | HCP |
| RH_medialorbitofrontal_thickavg | ICC3 | 0.7694 | 7.67   | 34 | 34 | 2.08E-08 | 0.625  | 0.863 | v5.3          | HCP |
| RH_medialorbitofrontal_thickavg | ICC2 | 0.7039 | 10.65  | 34 | 34 | 2.25E-10 | 0.203  | 0.868 | v5.3 vs. v6.0 | HCP |
| RH_medialorbitofrontal_thickavg | ICC2 | 0.8402 | 11.76  | 34 | 34 | 5.41E-11 | 0.734  | 0.906 | v5.3 vs. v7.1 | HCP |
| RH_medialorbitofrontal_thickavg | ICC3 | 0.8668 | 14.02  | 34 | 34 | 4.10E-12 | 0.776  | 0.923 | v6.0          | HCP |
| RH_medialorbitofrontal_thickavg | ICC2 | 0.6332 | 12.01  | 34 | 34 | 4.01E-11 | -0.006 | 0.849 | v6.0 vs. v7.1 | HCP |
| RH_medialorbitofrontal_thickavg | ICC3 | 0.8315 | 10.87  | 34 | 34 | 1.69E-10 | 0.720  | 0.901 | v7.1          | HCP |
| RH_middletemporal_surfavg       | ICC3 | 0.9886 | 174.84 | 34 | 34 | 7.29E-30 | 0.980  | 0.994 | v5.3          | HCP |
| RH_middletemporal_surfavg       | ICC2 | 0.9516 | 94.77  | 34 | 34 | 2.08E-25 | 0.659  | 0.983 | v5.3 vs. v6.0 | HCP |
| RH_middletemporal_surfavg       | ICC2 | 0.9149 | 87.87  | 34 | 34 | 7.31E-25 | 0.219  | 0.974 | v5.3 vs. v7.1 | HCP |
| RH_middletemporal_surfavg       | ICC3 | 0.9886 | 175.05 | 34 | 34 | 7.14E-30 | 0.980  | 0.994 | v6.0          | HCP |
| RH_middletemporal_surfavg       | ICC2 | 0.9835 | 250.04 | 34 | 34 | 1.76E-32 | 0.892  | 0.994 | v6.0 vs. v7.1 | HCP |
| RH_middletemporal_surfavg       | ICC3 | 0.9944 | 353.38 | 34 | 34 | 5.10E-35 | 0.990  | 0.997 | v7.1          | HCP |
| RH_middletemporal_thickavg      | ICC3 | 0.9476 | 37.18  | 34 | 34 | 1.00E-18 | 0.909  | 0.970 | v5.3          | HCP |
| RH_middletemporal_thickavg      | ICC2 | 0.9295 | 48.88  | 34 | 34 | 1.17E-20 | 0.714  | 0.971 | v5.3 vs. v6.0 | HCP |
| RH_middletemporal_thickavg      | ICC2 | 0.6747 | 31.96  | 34 | 34 | 1.15E-17 | -0.030 | 0.887 | v5.3 vs. v7.1 | HCP |
| RH_middletemporal_thickavg      | ICC3 | 0.9556 | 44.08  | 34 | 34 | 6.33E-20 | 0.923  | 0.975 | v6.0          | HCP |
| RH_middletemporal_thickavg      | ICC2 | 0.7962 | 50.82  | 34 | 34 | 6.21E-21 | 0.000  | 0.935 | v6.0 vs. v7.1 | HCP |
| RH_middletemporal_thickavg      | ICC3 | 0.9571 | 45.64  | 34 | 34 | 3.59E-20 | 0.925  | 0.976 | v7.1          | HCP |
| RH_Pallidum                     | ICC3 | 0.7372 | 6.61   | 34 | 34 | 1.47E-07 | 0.577  | 0.843 | v5.3          | HCP |
| RH_Pallidum                     | ICC2 | 0.2449 | 5.66   | 34 | 34 | 1.02E-06 | -0.053 | 0.551 | v5.3 vs. v6.0 | HCP |
| RH_Pallidum                     | ICC2 | 0.2115 | 7.53   | 34 | 34 | 2.66E-08 | -0.034 | 0.514 | v5.3 vs. v7.1 | HCP |
| RH_Pallidum                     | ICC3 | 0.8087 | 9.46   | 34 | 34 | 1.21E-09 | 0.684  | 0.887 | v6.0          | HCP |
| RH_Pallidum                     | ICC2 | 0.8233 | 13.73  | 34 | 34 | 5.63E-12 | 0.622  | 0.909 | v6.0 vs. v7.1 | HCP |
| RH_Pallidum                     | ICC3 | 0.9029 | 19.59  | 34 | 34 | 2.56E-14 | 0.834  | 0.944 | v7.1          | HCP |
| RH_paracentral_surfavg          | ICC3 | 0.9454 | 35.60  | 34 | 34 | 2.03E-18 | 0.905  | 0.969 | v5.3          | HCP |
| RH_paracentral_surfavg          | ICC2 | 0.7983 | 8.71   | 34 | 34 | 3.74E-09 | 0.668  | 0.881 | v5.3 vs. v6.0 | HCP |
| RH_paracentral_surfavg          | ICC2 | 0.8310 | 11.08  | 34 | 34 | 1.28E-10 | 0.720  | 0.901 | v5.3 vs. v7.1 | HCP |
| RH_paracentral_surfavg          | ICC3 | 0.9520 | 40.69  | 34 | 34 | 2.33E-19 | 0.917  | 0.973 | v6.0          | HCP |

|                             |      |        |        |    |    |          |        |       |               |     |
|-----------------------------|------|--------|--------|----|----|----------|--------|-------|---------------|-----|
| RH_paracentral_surfavg      | ICC2 | 0.9785 | 117.04 | 34 | 34 | 6.12E-27 | 0.951  | 0.989 | v6.0 vs. v7.1 | HCP |
| RH_paracentral_surfavg      | ICC3 | 0.9833 | 118.90 | 34 | 34 | 4.70E-27 | 0.971  | 0.991 | v7.1          | HCP |
| RH_paracentral_thickavg     | ICC3 | 0.9526 | 41.19  | 34 | 34 | 1.91E-19 | 0.918  | 0.973 | v5.3          | HCP |
| RH_paracentral_thickavg     | ICC2 | 0.8791 | 18.60  | 34 | 34 | 5.70E-14 | 0.767  | 0.934 | v5.3 vs. v6.0 | HCP |
| RH_paracentral_thickavg     | ICC2 | 0.9140 | 21.66  | 34 | 34 | 5.41E-15 | 0.852  | 0.951 | v5.3 vs. v7.1 | HCP |
| RH_paracentral_thickavg     | ICC3 | 0.9453 | 35.58  | 34 | 34 | 2.04E-18 | 0.905  | 0.969 | v6.0          | HCP |
| RH_paracentral_thickavg     | ICC2 | 0.9499 | 67.70  | 34 | 34 | 5.53E-23 | 0.798  | 0.980 | v6.0 vs. v7.1 | HCP |
| RH_paracentral_thickavg     | ICC3 | 0.9463 | 36.21  | 34 | 34 | 1.54E-18 | 0.907  | 0.969 | v7.1          | HCP |
| RH_parahippocampal_surfavg  | ICC3 | 0.8835 | 16.16  | 34 | 34 | 4.86E-13 | 0.802  | 0.933 | v5.3          | HCP |
| RH_parahippocampal_surfavg  | ICC2 | 0.6421 | 7.25   | 34 | 34 | 4.40E-08 | 0.225  | 0.821 | v5.3 vs. v6.0 | HCP |
| RH_parahippocampal_surfavg  | ICC2 | 0.5555 | 6.39   | 34 | 34 | 2.27E-07 | 0.059  | 0.781 | v5.3 vs. v7.1 | HCP |
| RH_parahippocampal_surfavg  | ICC3 | 0.8859 | 16.53  | 34 | 34 | 3.45E-13 | 0.806  | 0.934 | v6.0          | HCP |
| RH_parahippocampal_surfavg  | ICC2 | 0.8896 | 22.44  | 34 | 34 | 3.10E-15 | 0.755  | 0.944 | v6.0 vs. v7.1 | HCP |
| RH_parahippocampal_surfavg  | ICC3 | 0.9614 | 50.87  | 34 | 34 | 6.11E-21 | 0.933  | 0.978 | v7.1          | HCP |
| RH_parahippocampal_thickavg | ICC3 | 0.9146 | 22.43  | 34 | 34 | 3.12E-15 | 0.854  | 0.951 | v5.3          | HCP |
| RH_parahippocampal_thickavg | ICC2 | 0.9363 | 30.73  | 34 | 34 | 2.15E-17 | 0.890  | 0.963 | v5.3 vs. v6.0 | HCP |
| RH_parahippocampal_thickavg | ICC2 | 0.7361 | 17.96  | 34 | 34 | 9.72E-14 | 0.060  | 0.900 | v5.3 vs. v7.1 | HCP |
| RH_parahippocampal_thickavg | ICC3 | 0.9377 | 31.11  | 34 | 34 | 1.76E-17 | 0.892  | 0.964 | v6.0          | HCP |
| RH_parahippocampal_thickavg | ICC2 | 0.8076 | 69.36  | 34 | 34 | 3.70E-23 | 0.000  | 0.941 | v6.0 vs. v7.1 | HCP |
| RH_parahippocampal_thickavg | ICC3 | 0.9484 | 37.75  | 34 | 34 | 7.85E-19 | 0.910  | 0.971 | v7.1          | HCP |
| RH_parsopercularis_surfavg  | ICC3 | 0.9751 | 79.20  | 34 | 34 | 4.11E-24 | 0.956  | 0.986 | v5.3          | HCP |
| RH_parsopercularis_surfavg  | ICC2 | 0.9239 | 29.29  | 34 | 34 | 4.61E-17 | 0.856  | 0.958 | v5.3 vs. v6.0 | HCP |
| RH_parsopercularis_surfavg  | ICC2 | 0.9009 | 23.90  | 34 | 34 | 1.15E-15 | 0.795  | 0.948 | v5.3 vs. v7.1 | HCP |
| RH_parsopercularis_surfavg  | ICC3 | 0.9907 | 214.78 | 34 | 34 | 2.28E-31 | 0.984  | 0.995 | v6.0          | HCP |
| RH_parsopercularis_surfavg  | ICC2 | 0.9866 | 163.43 | 34 | 34 | 2.27E-29 | 0.975  | 0.993 | v6.0 vs. v7.1 | HCP |
| RH_parsopercularis_surfavg  | ICC3 | 0.9760 | 82.21  | 34 | 34 | 2.21E-24 | 0.958  | 0.986 | v7.1          | HCP |
| RH_parsopercularis_thickavg | ICC3 | 0.9158 | 22.76  | 34 | 34 | 2.49E-15 | 0.856  | 0.952 | v5.3          | HCP |
| RH_parsopercularis_thickavg | ICC2 | 0.8930 | 26.15  | 34 | 34 | 2.80E-16 | 0.709  | 0.950 | v5.3 vs. v6.0 | HCP |
| RH_parsopercularis_thickavg | ICC2 | 0.9075 | 23.67  | 34 | 34 | 1.34E-15 | 0.828  | 0.949 | v5.3 vs. v7.1 | HCP |
| RH_parsopercularis_thickavg | ICC3 | 0.9187 | 23.59  | 34 | 34 | 1.42E-15 | 0.860  | 0.953 | v6.0          | HCP |
| RH_parsopercularis_thickavg | ICC2 | 0.8484 | 35.20  | 34 | 34 | 2.42E-18 | 0.186  | 0.947 | v6.0 vs. v7.1 | HCP |
| RH_parsopercularis_thickavg | ICC3 | 0.9448 | 35.26  | 34 | 34 | 2.36E-18 | 0.904  | 0.968 | v7.1          | HCP |
| RH_parsorbitalis_surfavg    | ICC3 | 0.9536 | 42.14  | 34 | 34 | 1.32E-19 | 0.919  | 0.974 | v5.3          | HCP |
| RH_parsorbitalis_surfavg    | ICC2 | 0.7299 | 20.24  | 34 | 34 | 1.54E-14 | 0.020  | 0.901 | v5.3 vs. v6.0 | HCP |
| RH_parsorbitalis_surfavg    | ICC2 | 0.5988 | 17.83  | 34 | 34 | 1.09E-13 | -0.044 | 0.845 | v5.3 vs. v7.1 | HCP |
| RH_parsorbitalis_surfavg    | ICC3 | 0.9688 | 63.20  | 34 | 34 | 1.72E-22 | 0.945  | 0.982 | v6.0          | HCP |
| RH_parsorbitalis_surfavg    | ICC2 | 0.9231 | 56.08  | 34 | 34 | 1.23E-21 | 0.556  | 0.972 | v6.0 vs. v7.1 | HCP |
| RH_parsorbitalis_surfavg    | ICC3 | 0.9852 | 133.78 | 34 | 34 | 6.52E-28 | 0.974  | 0.992 | v7.1          | HCP |
| RH_parsorbitalis_thickavg   | ICC3 | 0.8661 | 13.94  | 34 | 34 | 4.47E-12 | 0.774  | 0.922 | v5.3          | HCP |
| RH_parsorbitalis_thickavg   | ICC2 | 0.8964 | 18.02  | 34 | 34 | 9.23E-14 | 0.824  | 0.940 | v5.3 vs. v6.0 | HCP |
| RH_parsorbitalis_thickavg   | ICC2 | 0.6394 | 12.09  | 34 | 34 | 3.65E-11 | -0.001 | 0.852 | v5.3 vs. v7.1 | HCP |
| RH_parsorbitalis_thickavg   | ICC3 | 0.8607 | 13.36  | 34 | 34 | 8.39E-12 | 0.766  | 0.919 | v6.0          | HCP |
| RH_parsorbitalis_thickavg   | ICC2 | 0.6764 | 17.31  | 34 | 34 | 1.72E-13 | -0.016 | 0.877 | v6.0 vs. v7.1 | HCP |
| RH_parsorbitalis_thickavg   | ICC3 | 0.9041 | 19.85  | 34 | 34 | 2.10E-14 | 0.836  | 0.945 | v7.1          | HCP |

|                                |      |        |        |    |    |          |       |       |               |     |
|--------------------------------|------|--------|--------|----|----|----------|-------|-------|---------------|-----|
| RH_parstriangularis_surfavg    | ICC3 | 0.9583 | 46.93  | 34 | 34 | 2.29E-20 | 0.927 | 0.976 | v5.3          | HCP |
| RH_parstriangularis_surfavg    | ICC2 | 0.8494 | 13.29  | 34 | 34 | 9.01E-12 | 0.742 | 0.913 | v5.3 vs. v6.0 | HCP |
| RH_parstriangularis_surfavg    | ICC2 | 0.8181 | 12.40  | 34 | 34 | 2.50E-11 | 0.647 | 0.902 | v5.3 vs. v7.1 | HCP |
| RH_parstriangularis_surfavg    | ICC3 | 0.9817 | 108.24 | 34 | 34 | 2.26E-26 | 0.968 | 0.990 | v6.0          | HCP |
| RH_parstriangularis_surfavg    | ICC2 | 0.9836 | 195.71 | 34 | 34 | 1.09E-30 | 0.939 | 0.993 | v6.0 vs. v7.1 | HCP |
| RH_parstriangularis_surfavg    | ICC3 | 0.9750 | 78.97  | 34 | 34 | 4.31E-24 | 0.956 | 0.986 | v7.1          | HCP |
| RH_parstriangularis_thickavg   | ICC3 | 0.8875 | 16.77  | 34 | 34 | 2.77E-13 | 0.809 | 0.935 | v5.3          | HCP |
| RH_parstriangularis_thickavg   | ICC2 | 0.9111 | 24.19  | 34 | 34 | 9.56E-16 | 0.838 | 0.950 | v5.3 vs. v6.0 | HCP |
| RH_parstriangularis_thickavg   | ICC2 | 0.8421 | 22.61  | 34 | 34 | 2.75E-15 | 0.413 | 0.936 | v5.3 vs. v7.1 | HCP |
| RH_parstriangularis_thickavg   | ICC3 | 0.8991 | 18.83  | 34 | 34 | 4.73E-14 | 0.828 | 0.942 | v6.0          | HCP |
| RH_parstriangularis_thickavg   | ICC2 | 0.7928 | 35.00  | 34 | 34 | 2.66E-18 | 0.024 | 0.931 | v6.0 vs. v7.1 | HCP |
| RH_parstriangularis_thickavg   | ICC3 | 0.9163 | 22.90  | 34 | 34 | 2.27E-15 | 0.856 | 0.952 | v7.1          | HCP |
| RH_pericalcarine_surfavg       | ICC3 | 0.9797 | 97.74  | 34 | 34 | 1.24E-25 | 0.964 | 0.989 | v5.3          | HCP |
| RH_pericalcarine_surfavg       | ICC2 | 0.7681 | 9.38   | 34 | 34 | 1.35E-09 | 0.569 | 0.872 | v5.3 vs. v6.0 | HCP |
| RH_pericalcarine_surfavg       | ICC2 | 0.7426 | 8.47   | 34 | 34 | 5.51E-09 | 0.520 | 0.858 | v5.3 vs. v7.1 | HCP |
| RH_pericalcarine_surfavg       | ICC3 | 0.9919 | 247.03 | 34 | 34 | 2.16E-32 | 0.986 | 0.995 | v6.0          | HCP |
| RH_pericalcarine_surfavg       | ICC2 | 0.9837 | 125.12 | 34 | 34 | 2.00E-27 | 0.971 | 0.991 | v6.0 vs. v7.1 | HCP |
| RH_pericalcarine_surfavg       | ICC3 | 0.9799 | 98.55  | 34 | 34 | 1.08E-25 | 0.965 | 0.989 | v7.1          | HCP |
| RH_pericalcarine_thickavg      | ICC3 | 0.8837 | 16.19  | 34 | 34 | 4.72E-13 | 0.803 | 0.933 | v5.3          | HCP |
| RH_pericalcarine_thickavg      | ICC2 | 0.8121 | 16.98  | 34 | 34 | 2.29E-13 | 0.416 | 0.919 | v5.3 vs. v6.0 | HCP |
| RH_pericalcarine_thickavg      | ICC2 | 0.8307 | 10.58  | 34 | 34 | 2.47E-10 | 0.718 | 0.901 | v5.3 vs. v7.1 | HCP |
| RH_pericalcarine_thickavg      | ICC3 | 0.8231 | 10.30  | 34 | 34 | 3.61E-10 | 0.706 | 0.896 | v6.0          | HCP |
| RH_pericalcarine_thickavg      | ICC2 | 0.8021 | 16.58  | 34 | 34 | 3.29E-13 | 0.372 | 0.915 | v6.0 vs. v7.1 | HCP |
| RH_pericalcarine_thickavg      | ICC3 | 0.9208 | 24.25  | 34 | 34 | 9.18E-16 | 0.864 | 0.955 | v7.1          | HCP |
| RH_postcentral_surfavg         | ICC3 | 0.9880 | 165.33 | 34 | 34 | 1.87E-29 | 0.979 | 0.993 | v5.3          | HCP |
| RH_postcentral_surfavg         | ICC2 | 0.8579 | 13.45  | 34 | 34 | 7.61E-12 | 0.762 | 0.917 | v5.3 vs. v6.0 | HCP |
| RH_postcentral_surfavg         | ICC2 | 0.8630 | 13.35  | 34 | 34 | 8.45E-12 | 0.770 | 0.920 | v5.3 vs. v7.1 | HCP |
| RH_postcentral_surfavg         | ICC3 | 0.9928 | 278.36 | 34 | 34 | 2.88E-33 | 0.987 | 0.996 | v6.0          | HCP |
| RH_postcentral_surfavg         | ICC2 | 0.9897 | 288.44 | 34 | 34 | 1.58E-33 | 0.967 | 0.995 | v6.0 vs. v7.1 | HCP |
| RH_postcentral_surfavg         | ICC3 | 0.9928 | 275.15 | 34 | 34 | 3.50E-33 | 0.987 | 0.996 | v7.1          | HCP |
| RH_postcentral_thickavg        | ICC3 | 0.9385 | 31.51  | 34 | 34 | 1.44E-17 | 0.894 | 0.965 | v5.3          | HCP |
| RH_postcentral_thickavg        | ICC2 | 0.8760 | 28.96  | 34 | 34 | 5.54E-17 | 0.507 | 0.950 | v5.3 vs. v6.0 | HCP |
| RH_postcentral_thickavg        | ICC2 | 0.9363 | 29.57  | 34 | 34 | 3.98E-17 | 0.890 | 0.964 | v5.3 vs. v7.1 | HCP |
| RH_postcentral_thickavg        | ICC3 | 0.9574 | 45.99  | 34 | 34 | 3.17E-20 | 0.926 | 0.976 | v6.0          | HCP |
| RH_postcentral_thickavg        | ICC2 | 0.9041 | 68.15  | 34 | 34 | 4.96E-23 | 0.239 | 0.969 | v6.0 vs. v7.1 | HCP |
| RH_postcentral_thickavg        | ICC3 | 0.9526 | 41.20  | 34 | 34 | 1.90E-19 | 0.918 | 0.973 | v7.1          | HCP |
| RH_posteriorcingulate_surfavg  | ICC3 | 0.9722 | 70.95  | 34 | 34 | 2.55E-23 | 0.951 | 0.984 | v5.3          | HCP |
| RH_posteriorcingulate_surfavg  | ICC2 | 0.8717 | 16.28  | 34 | 34 | 4.34E-13 | 0.773 | 0.927 | v5.3 vs. v6.0 | HCP |
| RH_posteriorcingulate_surfavg  | ICC2 | 0.8880 | 17.28  | 34 | 34 | 1.77E-13 | 0.810 | 0.935 | v5.3 vs. v7.1 | HCP |
| RH_posteriorcingulate_surfavg  | ICC3 | 0.9664 | 58.61  | 34 | 34 | 5.97E-22 | 0.941 | 0.981 | v6.0          | HCP |
| RH_posteriorcingulate_surfavg  | ICC2 | 0.9802 | 115.54 | 34 | 34 | 7.60E-27 | 0.962 | 0.989 | v6.0 vs. v7.1 | HCP |
| RH_posteriorcingulate_surfavg  | ICC3 | 0.9838 | 122.76 | 34 | 34 | 2.75E-27 | 0.972 | 0.991 | v7.1          | HCP |
| RH_posteriorcingulate_thickavg | ICC3 | 0.8564 | 12.92  | 34 | 34 | 1.37E-11 | 0.759 | 0.916 | v5.3          | HCP |
| RH_posteriorcingulate_thickavg | ICC2 | 0.8279 | 11.06  | 34 | 34 | 1.31E-10 | 0.714 | 0.899 | v5.3 vs. v6.0 | HCP |



|                                      |      |        |        |    |    |          |        |       |               |     |
|--------------------------------------|------|--------|--------|----|----|----------|--------|-------|---------------|-----|
| RH_posteriorcingulate_thickavg       | ICC2 | 0.4367 | 13.21  | 34 | 34 | 9.94E-12 | -0.046 | 0.747 | v5.3 vs. v7.1 | HCP |
| RH_posteriorcingulate_thickavg       | ICC3 | 0.9028 | 19.58  | 34 | 34 | 2.59E-14 | 0.834  | 0.944 | v6.0          | HCP |
| RH_posteriorcingulate_thickavg       | ICC2 | 0.5065 | 11.18  | 34 | 34 | 1.13E-10 | -0.056 | 0.786 | v6.0 vs. v7.1 | HCP |
| RH_posteriorcingulate_thickavg       | ICC3 | 0.8704 | 14.44  | 34 | 34 | 2.65E-12 | 0.781  | 0.925 | v7.1          | HCP |
| RH_precentral_surfavg                | ICC3 | 0.9849 | 131.13 | 34 | 34 | 9.13E-28 | 0.973  | 0.991 | v5.3          | HCP |
| RH_precentral_surfavg                | ICC2 | 0.9592 | 54.29  | 34 | 34 | 2.10E-21 | 0.924  | 0.978 | v5.3 vs. v6.0 | HCP |
| RH_precentral_surfavg                | ICC2 | 0.9586 | 50.68  | 34 | 34 | 6.50E-21 | 0.926  | 0.977 | v5.3 vs. v7.1 | HCP |
| RH_precentral_surfavg                | ICC3 | 0.9905 | 210.61 | 34 | 34 | 3.18E-31 | 0.983  | 0.995 | v6.0          | HCP |
| RH_precentral_surfavg                | ICC2 | 0.9956 | 459.64 | 34 | 34 | 5.96E-37 | 0.992  | 0.998 | v6.0 vs. v7.1 | HCP |
| RH_precentral_surfavg                | ICC3 | 0.9930 | 283.69 | 34 | 34 | 2.09E-33 | 0.988  | 0.996 | v7.1          | HCP |
| RH_precentral_thickavg               | ICC3 | 0.9064 | 20.37  | 34 | 34 | 1.40E-14 | 0.840  | 0.946 | v5.3          | HCP |
| RH_precentral_thickavg               | ICC2 | 0.8588 | 26.94  | 34 | 34 | 1.74E-16 | 0.415  | 0.945 | v5.3 vs. v6.0 | HCP |
| RH_precentral_thickavg               | ICC2 | 0.9150 | 23.39  | 34 | 34 | 1.62E-15 | 0.854  | 0.951 | v5.3 vs. v7.1 | HCP |
| RH_precentral_thickavg               | ICC3 | 0.9259 | 26.00  | 34 | 34 | 3.07E-16 | 0.872  | 0.958 | v6.0          | HCP |
| RH_precentral_thickavg               | ICC2 | 0.8436 | 57.86  | 34 | 34 | 7.37E-22 | 0.041  | 0.951 | v6.0 vs. v7.1 | HCP |
| RH_precentral_thickavg               | ICC3 | 0.9086 | 20.88  | 34 | 34 | 9.55E-15 | 0.844  | 0.947 | v7.1          | HCP |
| RH_precuneus_surfavg                 | ICC3 | 0.9837 | 121.76 | 34 | 34 | 3.16E-27 | 0.971  | 0.991 | v5.3          | HCP |
| RH_precuneus_surfavg                 | ICC2 | 0.7551 | 7.19   | 34 | 34 | 4.95E-08 | 0.605  | 0.854 | v5.3 vs. v6.0 | HCP |
| RH_precuneus_surfavg                 | ICC2 | 0.7448 | 6.72   | 34 | 34 | 1.19E-07 | 0.588  | 0.848 | v5.3 vs. v7.1 | HCP |
| RH_precuneus_surfavg                 | ICC3 | 0.9911 | 224.70 | 34 | 34 | 1.07E-31 | 0.984  | 0.995 | v6.0          | HCP |
| RH_precuneus_surfavg                 | ICC2 | 0.9941 | 499.94 | 34 | 34 | 1.44E-37 | 0.982  | 0.997 | v6.0 vs. v7.1 | HCP |
| RH_precuneus_surfavg                 | ICC3 | 0.9931 | 288.74 | 34 | 34 | 1.55E-33 | 0.988  | 0.996 | v7.1          | HCP |
| RH_precuneus_thickavg                | ICC3 | 0.9371 | 30.82  | 34 | 34 | 2.05E-17 | 0.891  | 0.964 | v5.3          | HCP |
| RH_precuneus_thickavg                | ICC2 | 0.8299 | 12.08  | 34 | 34 | 3.68E-11 | 0.703  | 0.903 | v5.3 vs. v6.0 | HCP |
| RH_precuneus_thickavg                | ICC2 | 0.8054 | 11.78  | 34 | 34 | 5.31E-11 | 0.614  | 0.896 | v5.3 vs. v7.1 | HCP |
| RH_precuneus_thickavg                | ICC3 | 0.9425 | 33.76  | 34 | 34 | 4.76E-18 | 0.900  | 0.967 | v6.0          | HCP |
| RH_precuneus_thickavg                | ICC2 | 0.8068 | 50.25  | 34 | 34 | 7.46E-21 | 0.008  | 0.939 | v6.0 vs. v7.1 | HCP |
| RH_precuneus_thickavg                | ICC3 | 0.9308 | 27.91  | 34 | 34 | 9.99E-17 | 0.881  | 0.960 | v7.1          | HCP |
| RH_Putamen                           | ICC3 | 0.9406 | 32.65  | 34 | 34 | 8.16E-18 | 0.897  | 0.966 | v5.3          | HCP |
| RH_Putamen                           | ICC2 | 0.7315 | 16.79  | 34 | 34 | 2.72E-13 | 0.071  | 0.896 | v5.3 vs. v6.0 | HCP |
| RH_Putamen                           | ICC2 | 0.8267 | 25.23  | 34 | 34 | 4.92E-16 | 0.241  | 0.935 | v5.3 vs. v7.1 | HCP |
| RH_Putamen                           | ICC3 | 0.9108 | 21.42  | 34 | 34 | 6.41E-15 | 0.847  | 0.949 | v6.0          | HCP |
| RH_Putamen                           | ICC2 | 0.9064 | 23.08  | 34 | 34 | 1.99E-15 | 0.829  | 0.948 | v6.0 vs. v7.1 | HCP |
| RH_Putamen                           | ICC3 | 0.9495 | 38.60  | 34 | 34 | 5.47E-19 | 0.912  | 0.971 | v7.1          | HCP |
| RH_rostralanteriorcingulate_surfavg  | ICC3 | 0.9561 | 44.59  | 34 | 34 | 5.25E-20 | 0.924  | 0.975 | v5.3          | HCP |
| RH_rostralanteriorcingulate_surfavg  | ICC2 | 0.7183 | 15.73  | 34 | 34 | 7.32E-13 | 0.062  | 0.890 | v5.3 vs. v6.0 | HCP |
| RH_rostralanteriorcingulate_surfavg  | ICC2 | 0.7792 | 13.81  | 34 | 34 | 5.13E-12 | 0.373  | 0.902 | v5.3 vs. v7.1 | HCP |
| RH_rostralanteriorcingulate_surfavg  | ICC3 | 0.9767 | 85.02  | 34 | 34 | 1.26E-24 | 0.959  | 0.987 | v6.0          | HCP |
| RH_rostralanteriorcingulate_surfavg  | ICC2 | 0.9526 | 64.62  | 34 | 34 | 1.19E-22 | 0.843  | 0.979 | v6.0 vs. v7.1 | HCP |
| RH_rostralanteriorcingulate_surfavg  | ICC3 | 0.9796 | 97.14  | 34 | 34 | 1.37E-25 | 0.964  | 0.988 | v7.1          | HCP |
| RH_rostralanteriorcingulate_thickavg | ICC3 | 0.7688 | 7.65   | 34 | 34 | 2.17E-08 | 0.624  | 0.863 | v5.3          | HCP |
| RH_rostralanteriorcingulate_thickavg | ICC2 | 0.5467 | 6.93   | 34 | 34 | 7.94E-08 | 0.014  | 0.784 | v5.3 vs. v6.0 | HCP |
| RH_rostralanteriorcingulate_thickavg | ICC2 | 0.6295 | 7.03   | 34 | 34 | 6.59E-08 | 0.202  | 0.815 | v5.3 vs. v7.1 | HCP |
| RH_rostralanteriorcingulate_thickavg | ICC3 | 0.7811 | 8.14   | 34 | 34 | 9.49E-09 | 0.642  | 0.870 | v6.0          | HCP |

|                                      |      |        |        |    |    |          |        |       |               |     |
|--------------------------------------|------|--------|--------|----|----|----------|--------|-------|---------------|-----|
| RH_rostralanteriorcingulate_thickavg | ICC2 | 0.3778 | 11.45  | 34 | 34 | 7.93E-11 | -0.044 | 0.699 | v6.0 vs. v7.1 | HCP |
| RH_rostralanteriorcingulate_thickavg | ICC3 | 0.8384 | 11.37  | 34 | 34 | 8.79E-11 | 0.730  | 0.905 | v7.1          | HCP |
| RH_rostralmiddlefrontal_surfavg      | ICC3 | 0.9931 | 290.17 | 34 | 34 | 1.43E-33 | 0.988  | 0.996 | v5.3          | HCP |
| RH_rostralmiddlefrontal_surfavg      | ICC2 | 0.9664 | 59.17  | 34 | 34 | 5.10E-22 | 0.941  | 0.981 | v5.3 vs. v6.0 | HCP |
| RH_rostralmiddlefrontal_surfavg      | ICC2 | 0.9612 | 55.00  | 34 | 34 | 1.70E-21 | 0.930  | 0.978 | v5.3 vs. v7.1 | HCP |
| RH_rostralmiddlefrontal_surfavg      | ICC3 | 0.9956 | 456.33 | 34 | 34 | 6.74E-37 | 0.992  | 0.998 | v6.0          | HCP |
| RH_rostralmiddlefrontal_surfavg      | ICC2 | 0.9861 | 503.66 | 34 | 34 | 1.27E-37 | 0.754  | 0.996 | v6.0 vs. v7.1 | HCP |
| RH_rostralmiddlefrontal_surfavg      | ICC3 | 0.9927 | 271.19 | 34 | 34 | 4.47E-33 | 0.987  | 0.996 | v7.1          | HCP |
| RH_rostralmiddlefrontal_thickavg     | ICC3 | 0.7709 | 7.73   | 34 | 34 | 1.90E-08 | 0.627  | 0.864 | v5.3          | HCP |
| RH_rostralmiddlefrontal_thickavg     | ICC2 | 0.8318 | 13.53  | 34 | 34 | 6.93E-12 | 0.670  | 0.910 | v5.3 vs. v6.0 | HCP |
| RH_rostralmiddlefrontal_thickavg     | ICC2 | 0.6573 | 10.09  | 34 | 34 | 4.88E-10 | 0.088  | 0.850 | v5.3 vs. v7.1 | HCP |
| RH_rostralmiddlefrontal_thickavg     | ICC3 | 0.7616 | 7.39   | 34 | 34 | 3.45E-08 | 0.613  | 0.858 | v6.0          | HCP |
| RH_rostralmiddlefrontal_thickavg     | ICC2 | 0.6036 | 23.81  | 34 | 34 | 1.23E-15 | -0.038 | 0.852 | v6.0 vs. v7.1 | HCP |
| RH_rostralmiddlefrontal_thickavg     | ICC3 | 0.8260 | 10.49  | 34 | 34 | 2.78E-10 | 0.711  | 0.898 | v7.1          | HCP |
| RH_superiorfrontal_surfavg           | ICC3 | 0.9931 | 287.18 | 34 | 34 | 1.70E-33 | 0.988  | 0.996 | v5.3          | HCP |
| RH_superiorfrontal_surfavg           | ICC2 | 0.9609 | 62.49  | 34 | 34 | 2.07E-22 | 0.915  | 0.980 | v5.3 vs. v6.0 | HCP |
| RH_superiorfrontal_surfavg           | ICC2 | 0.9424 | 44.21  | 34 | 34 | 6.05E-20 | 0.866  | 0.971 | v5.3 vs. v7.1 | HCP |
| RH_superiorfrontal_surfavg           | ICC3 | 0.9962 | 522.22 | 34 | 34 | 6.87E-38 | 0.993  | 0.998 | v6.0          | HCP |
| RH_superiorfrontal_surfavg           | ICC2 | 0.9958 | 602.29 | 34 | 34 | 6.13E-39 | 0.991  | 0.998 | v6.0 vs. v7.1 | HCP |
| RH_superiorfrontal_surfavg           | ICC3 | 0.9959 | 491.03 | 34 | 34 | 1.95E-37 | 0.993  | 0.998 | v7.1          | HCP |
| RH_superiorfrontal_thickavg          | ICC3 | 0.9206 | 24.18  | 34 | 34 | 9.62E-16 | 0.863  | 0.954 | v5.3          | HCP |
| RH_superiorfrontal_thickavg          | ICC2 | 0.9610 | 58.59  | 34 | 34 | 6.00E-22 | 0.924  | 0.979 | v5.3 vs. v6.0 | HCP |
| RH_superiorfrontal_thickavg          | ICC2 | 0.8336 | 30.76  | 34 | 34 | 2.12E-17 | 0.175  | 0.941 | v5.3 vs. v7.1 | HCP |
| RH_superiorfrontal_thickavg          | ICC3 | 0.9203 | 24.10  | 34 | 34 | 1.02E-15 | 0.863  | 0.954 | v6.0          | HCP |
| RH_superiorfrontal_thickavg          | ICC2 | 0.8951 | 51.19  | 34 | 34 | 5.51E-21 | 0.309  | 0.964 | v6.0 vs. v7.1 | HCP |
| RH_superiorfrontal_thickavg          | ICC3 | 0.9315 | 28.18  | 34 | 34 | 8.57E-17 | 0.882  | 0.961 | v7.1          | HCP |
| RH_superiorparietal_surfavg          | ICC3 | 0.9914 | 232.03 | 34 | 34 | 6.21E-32 | 0.985  | 0.995 | v5.3          | HCP |
| RH_superiorparietal_surfavg          | ICC2 | 0.9045 | 24.51  | 34 | 34 | 7.76E-16 | 0.806  | 0.950 | v5.3 vs. v6.0 | HCP |
| RH_superiorparietal_surfavg          | ICC2 | 0.9049 | 22.80  | 34 | 34 | 2.42E-15 | 0.825  | 0.947 | v5.3 vs. v7.1 | HCP |
| RH_superiorparietal_surfavg          | ICC3 | 0.9951 | 408.38 | 34 | 34 | 4.41E-36 | 0.991  | 0.997 | v6.0          | HCP |
| RH_superiorparietal_surfavg          | ICC2 | 0.9887 | 178.49 | 34 | 34 | 5.15E-30 | 0.980  | 0.994 | v6.0 vs. v7.1 | HCP |
| RH_superiorparietal_surfavg          | ICC3 | 0.9917 | 238.81 | 34 | 34 | 3.82E-32 | 0.985  | 0.995 | v7.1          | HCP |
| RH_superiorparietal_thickavg         | ICC3 | 0.9561 | 44.61  | 34 | 34 | 5.22E-20 | 0.924  | 0.975 | v5.3          | HCP |
| RH_superiorparietal_thickavg         | ICC2 | 0.9105 | 43.59  | 34 | 34 | 7.62E-20 | 0.569  | 0.966 | v5.3 vs. v6.0 | HCP |
| RH_superiorparietal_thickavg         | ICC2 | 0.9389 | 36.55  | 34 | 34 | 1.32E-18 | 0.884  | 0.967 | v5.3 vs. v7.1 | HCP |
| RH_superiorparietal_thickavg         | ICC3 | 0.9636 | 53.91  | 34 | 34 | 2.36E-21 | 0.936  | 0.979 | v6.0          | HCP |
| RH_superiorparietal_thickavg         | ICC2 | 0.8730 | 59.11  | 34 | 34 | 5.19E-22 | 0.115  | 0.960 | v6.0 vs. v7.1 | HCP |
| RH_superiorparietal_thickavg         | ICC3 | 0.9314 | 28.15  | 34 | 34 | 8.69E-17 | 0.882  | 0.961 | v7.1          | HCP |
| RH_superiortemporal_surfavg          | ICC3 | 0.9845 | 127.71 | 34 | 34 | 1.42E-27 | 0.973  | 0.991 | v5.3          | HCP |
| RH_superiortemporal_surfavg          | ICC2 | 0.9348 | 62.72  | 34 | 34 | 1.95E-22 | 0.641  | 0.976 | v5.3 vs. v6.0 | HCP |
| RH_superiortemporal_surfavg          | ICC2 | 0.8985 | 62.12  | 34 | 34 | 2.29E-22 | 0.238  | 0.967 | v5.3 vs. v7.1 | HCP |
| RH_superiortemporal_surfavg          | ICC3 | 0.9879 | 163.62 | 34 | 34 | 2.22E-29 | 0.979  | 0.993 | v6.0          | HCP |
| RH_superiortemporal_surfavg          | ICC2 | 0.9843 | 264.18 | 34 | 34 | 6.95E-33 | 0.896  | 0.994 | v6.0 vs. v7.1 | HCP |
| RH_superiortemporal_surfavg          | ICC3 | 0.9915 | 234.93 | 34 | 34 | 5.03E-32 | 0.985  | 0.995 | v7.1          | HCP |

|                              |      |        |         |    |    |          |        |       |               |     |
|------------------------------|------|--------|---------|----|----|----------|--------|-------|---------------|-----|
| RH_superiortemporal_thickavg | ICC3 | 0.9116 | 21.62   | 34 | 34 | 5.54E-15 | 0.849  | 0.949 | v5.3          | HCP |
| RH_superiortemporal_thickavg | ICC2 | 0.9237 | 25.51   | 34 | 34 | 4.14E-16 | 0.869  | 0.956 | v5.3 vs. v6.0 | HCP |
| RH_superiortemporal_thickavg | ICC2 | 0.7772 | 20.71   | 34 | 34 | 1.08E-14 | 0.123  | 0.916 | v5.3 vs. v7.1 | HCP |
| RH_superiortemporal_thickavg | ICC3 | 0.9466 | 36.45   | 34 | 34 | 1.38E-18 | 0.907  | 0.970 | v6.0          | HCP |
| RH_superiortemporal_thickavg | ICC2 | 0.7743 | 56.57   | 34 | 34 | 1.07E-21 | -0.010 | 0.929 | v6.0 vs. v7.1 | HCP |
| RH_superiortemporal_thickavg | ICC3 | 0.9126 | 21.88   | 34 | 34 | 4.62E-15 | 0.850  | 0.950 | v7.1          | HCP |
| RH_supramarginal_surfavg     | ICC3 | 0.9877 | 161.51  | 34 | 34 | 2.76E-29 | 0.978  | 0.993 | v5.3          | HCP |
| RH_supramarginal_surfavg     | ICC2 | 0.8200 | 10.30   | 34 | 34 | 3.65E-10 | 0.703  | 0.894 | v5.3 vs. v6.0 | HCP |
| RH_supramarginal_surfavg     | ICC2 | 0.8300 | 10.66   | 34 | 34 | 2.23E-10 | 0.718  | 0.900 | v5.3 vs. v7.1 | HCP |
| RH_supramarginal_surfavg     | ICC3 | 0.9917 | 239.06  | 34 | 34 | 3.75E-32 | 0.985  | 0.995 | v6.0          | HCP |
| RH_supramarginal_surfavg     | ICC2 | 0.9937 | 433.58  | 34 | 34 | 1.60E-36 | 0.983  | 0.997 | v6.0 vs. v7.1 | HCP |
| RH_supramarginal_surfavg     | ICC3 | 0.9964 | 559.91  | 34 | 34 | 2.11E-38 | 0.994  | 0.998 | v7.1          | HCP |
| RH_supramarginal_thickavg    | ICC3 | 0.8780 | 15.39   | 34 | 34 | 1.02E-12 | 0.794  | 0.929 | v5.3          | HCP |
| RH_supramarginal_thickavg    | ICC2 | 0.9275 | 26.55   | 34 | 34 | 2.20E-16 | 0.876  | 0.958 | v5.3 vs. v6.0 | HCP |
| RH_supramarginal_thickavg    | ICC2 | 0.7870 | 20.37   | 34 | 34 | 1.41E-14 | 0.167  | 0.919 | v5.3 vs. v7.1 | HCP |
| RH_supramarginal_thickavg    | ICC3 | 0.8987 | 18.74   | 34 | 34 | 5.09E-14 | 0.827  | 0.942 | v6.0          | HCP |
| RH_supramarginal_thickavg    | ICC2 | 0.8321 | 40.62   | 34 | 34 | 2.40E-19 | 0.076  | 0.945 | v6.0 vs. v7.1 | HCP |
| RH_supramarginal_thickavg    | ICC3 | 0.9239 | 25.27   | 34 | 34 | 4.81E-16 | 0.869  | 0.956 | v7.1          | HCP |
| RH_SurfArea                  | ICC3 | 0.9976 | 829.55  | 34 | 34 | 2.69E-41 | 0.996  | 0.999 | v5.3          | HCP |
| RH_SurfArea                  | ICC2 | 0.9980 | 2091.51 | 34 | 34 | 4.10E-48 | 0.985  | 0.999 | v5.3 vs. v6.0 | HCP |
| RH_SurfArea                  | ICC2 | 0.9848 | 1563.47 | 34 | 34 | 5.74E-46 | 0.351  | 0.996 | v5.3 vs. v7.1 | HCP |
| RH_SurfArea                  | ICC3 | 0.9973 | 730.77  | 34 | 34 | 2.31E-40 | 0.995  | 0.998 | v6.0          | HCP |
| RH_SurfArea                  | ICC2 | 0.9922 | 4077.54 | 34 | 34 | 4.86E-53 | 0.478  | 0.998 | v6.0 vs. v7.1 | HCP |
| RH_SurfArea                  | ICC3 | 0.9983 | 1163.06 | 34 | 34 | 8.71E-44 | 0.997  | 0.999 | v7.1          | HCP |
| RH_temporalpole_surfavg      | ICC3 | 0.7496 | 6.99    | 34 | 34 | 7.16E-08 | 0.595  | 0.851 | v5.3          | HCP |
| RH_temporalpole_surfavg      | ICC2 | 0.5611 | 6.90    | 34 | 34 | 8.49E-08 | 0.039  | 0.790 | v5.3 vs. v6.0 | HCP |
| RH_temporalpole_surfavg      | ICC2 | 0.4094 | 5.36    | 34 | 34 | 1.97E-06 | -0.057 | 0.694 | v5.3 vs. v7.1 | HCP |
| RH_temporalpole_surfavg      | ICC3 | 0.8030 | 9.15    | 34 | 34 | 1.90E-09 | 0.676  | 0.884 | v6.0          | HCP |
| RH_temporalpole_surfavg      | ICC2 | 0.7795 | 14.17   | 34 | 34 | 3.51E-12 | 0.356  | 0.903 | v6.0 vs. v7.1 | HCP |
| RH_temporalpole_surfavg      | ICC3 | 0.8875 | 16.77   | 34 | 34 | 2.77E-13 | 0.809  | 0.935 | v7.1          | HCP |
| RH_temporalpole_thickavg     | ICC3 | 0.7141 | 5.99    | 34 | 34 | 5.03E-07 | 0.544  | 0.828 | v5.3          | HCP |
| RH_temporalpole_thickavg     | ICC2 | 0.8354 | 17.37   | 34 | 34 | 1.62E-13 | 0.549  | 0.924 | v5.3 vs. v6.0 | HCP |
| RH_temporalpole_thickavg     | ICC2 | 0.5923 | 13.12   | 34 | 34 | 1.09E-11 | -0.043 | 0.835 | v5.3 vs. v7.1 | HCP |
| RH_temporalpole_thickavg     | ICC3 | 0.8524 | 12.55   | 34 | 34 | 2.11E-11 | 0.753  | 0.914 | v6.0          | HCP |
| RH_temporalpole_thickavg     | ICC2 | 0.7798 | 17.95   | 34 | 34 | 9.82E-14 | 0.203  | 0.913 | v6.0 vs. v7.1 | HCP |
| RH_temporalpole_thickavg     | ICC3 | 0.7920 | 8.62    | 34 | 34 | 4.37E-09 | 0.659  | 0.877 | v7.1          | HCP |
| RH_Thalamus                  | ICC3 | 0.8562 | 12.91   | 34 | 34 | 1.39E-11 | 0.759  | 0.916 | v5.3          | HCP |
| RH_Thalamus                  | ICC2 | 0.8925 | 17.17   | 34 | 34 | 1.94E-13 | 0.817  | 0.938 | v5.3 vs. v6.0 | HCP |
| RH_Thalamus                  | ICC2 | 0.8791 | 15.14   | 34 | 34 | 1.30E-12 | 0.795  | 0.930 | v5.3 vs. v7.1 | HCP |
| RH_Thalamus                  | ICC3 | 0.8301 | 10.77   | 34 | 34 | 1.92E-10 | 0.717  | 0.900 | v6.0          | HCP |
| RH_Thalamus                  | ICC2 | 0.8570 | 12.65   | 34 | 34 | 1.88E-11 | 0.759  | 0.917 | v6.0 vs. v7.1 | HCP |
| RH_Thalamus                  | ICC3 | 0.9021 | 19.43   | 34 | 34 | 2.91E-14 | 0.833  | 0.944 | v7.1          | HCP |
| RH_Thickness                 | ICC3 | 0.9401 | 32.39   | 34 | 34 | 9.24E-18 | 0.896  | 0.966 | v5.3          | HCP |
| RH_Thickness                 | ICC2 | 0.9507 | 50.16   | 34 | 34 | 7.69E-21 | 0.891  | 0.975 | v5.3 vs. v6.0 | HCP |

|                                     |      |        |        |    |    |          |        |       |               |     |
|-------------------------------------|------|--------|--------|----|----|----------|--------|-------|---------------|-----|
| RH_Thickness                        | ICC2 | 0.7617 | 35.18  | 34 | 34 | 2.46E-18 | -0.007 | 0.920 | v5.3 vs. v7.1 | HCP |
| RH_Thickness                        | ICC3 | 0.9459 | 35.97  | 34 | 34 | 1.71E-18 | 0.906  | 0.969 | v6.0          | HCP |
| RH_Thickness                        | ICC2 | 0.6961 | 67.81  | 34 | 34 | 5.38E-23 | -0.014 | 0.900 | v6.0 vs. v7.1 | HCP |
| RH_Thickness                        | ICC3 | 0.9401 | 32.39  | 34 | 34 | 9.27E-18 | 0.896  | 0.966 | v7.1          | HCP |
| RH_transversetemporal_surfavg       | ICC3 | 0.9347 | 29.61  | 34 | 34 | 3.89E-17 | 0.887  | 0.963 | v5.3          | HCP |
| RH_transversetemporal_surfavg       | ICC2 | 0.7902 | 10.14  | 34 | 34 | 4.55E-10 | 0.620  | 0.883 | v5.3 vs. v6.0 | HCP |
| RH_transversetemporal_surfavg       | ICC2 | 0.8446 | 12.37  | 34 | 34 | 2.60E-11 | 0.740  | 0.909 | v5.3 vs. v7.1 | HCP |
| RH_transversetemporal_surfavg       | ICC3 | 0.9454 | 35.66  | 34 | 34 | 1.97E-18 | 0.905  | 0.969 | v6.0          | HCP |
| RH_transversetemporal_surfavg       | ICC2 | 0.8976 | 20.79  | 34 | 34 | 1.02E-14 | 0.815  | 0.943 | v6.0 vs. v7.1 | HCP |
| RH_transversetemporal_surfavg       | ICC3 | 0.8971 | 18.44  | 34 | 34 | 6.50E-14 | 0.825  | 0.941 | v7.1          | HCP |
| RH_transversetemporal_thickavg      | ICC3 | 0.7185 | 6.10   | 34 | 34 | 4.02E-07 | 0.550  | 0.831 | v5.3          | HCP |
| RH_transversetemporal_thickavg      | ICC2 | 0.8057 | 9.73   | 34 | 34 | 8.07E-10 | 0.679  | 0.886 | v5.3 vs. v6.0 | HCP |
| RH_transversetemporal_thickavg      | ICC2 | 0.6760 | 5.30   | 34 | 34 | 2.26E-06 | 0.493  | 0.803 | v5.3 vs. v7.1 | HCP |
| RH_transversetemporal_thickavg      | ICC3 | 0.8909 | 17.33  | 34 | 34 | 1.68E-13 | 0.814  | 0.937 | v6.0          | HCP |
| RH_transversetemporal_thickavg      | ICC2 | 0.8558 | 25.12  | 34 | 34 | 5.29E-16 | 0.441  | 0.942 | v6.0 vs. v7.1 | HCP |
| RH_transversetemporal_thickavg      | ICC3 | 0.9005 | 19.11  | 34 | 34 | 3.77E-14 | 0.830  | 0.943 | v7.1          | HCP |
| SUM_bankssts_surfavg                | ICC3 | 0.9787 | 92.97  | 34 | 34 | 2.86E-25 | 0.963  | 0.988 | v5.3          | HCP |
| SUM_bankssts_surfavg                | ICC2 | 0.7835 | 11.84  | 34 | 34 | 4.93E-11 | 0.503  | 0.893 | v5.3 vs. v6.0 | HCP |
| SUM_bankssts_surfavg                | ICC2 | 0.7791 | 10.12  | 34 | 34 | 4.68E-10 | 0.576  | 0.880 | v5.3 vs. v7.1 | HCP |
| SUM_bankssts_surfavg                | ICC3 | 0.9786 | 92.67  | 34 | 34 | 3.01E-25 | 0.962  | 0.988 | v6.0          | HCP |
| SUM_bankssts_surfavg                | ICC2 | 0.9760 | 85.42  | 34 | 34 | 1.17E-24 | 0.958  | 0.986 | v6.0 vs. v7.1 | HCP |
| SUM_bankssts_surfavg                | ICC3 | 0.9816 | 107.64 | 34 | 34 | 2.48E-26 | 0.968  | 0.990 | v7.1          | HCP |
| SUM_caudalanteriorcingulate_surfavg | ICC3 | 0.9729 | 72.82  | 34 | 34 | 1.65E-23 | 0.952  | 0.985 | v5.3          | HCP |
| SUM_caudalanteriorcingulate_surfavg | ICC2 | 0.8363 | 34.93  | 34 | 34 | 2.75E-18 | 0.134  | 0.944 | v5.3 vs. v6.0 | HCP |
| SUM_caudalanteriorcingulate_surfavg | ICC2 | 0.9148 | 27.56  | 34 | 34 | 1.22E-16 | 0.826  | 0.955 | v5.3 vs. v7.1 | HCP |
| SUM_caudalanteriorcingulate_surfavg | ICC3 | 0.9909 | 218.17 | 34 | 34 | 1.75E-31 | 0.984  | 0.995 | v6.0          | HCP |
| SUM_caudalanteriorcingulate_surfavg | ICC2 | 0.9312 | 75.87  | 34 | 34 | 8.38E-24 | 0.472  | 0.977 | v6.0 vs. v7.1 | HCP |
| SUM_caudalanteriorcingulate_surfavg | ICC3 | 0.9886 | 173.78 | 34 | 34 | 8.07E-30 | 0.980  | 0.994 | v7.1          | HCP |
| SUM_caudalmiddlefrontal_surfavg     | ICC3 | 0.9933 | 298.51 | 34 | 34 | 8.83E-34 | 0.988  | 0.996 | v5.3          | HCP |
| SUM_caudalmiddlefrontal_surfavg     | ICC2 | 0.9801 | 97.70  | 34 | 34 | 1.25E-25 | 0.965  | 0.989 | v5.3 vs. v6.0 | HCP |
| SUM_caudalmiddlefrontal_surfavg     | ICC2 | 0.9729 | 70.79  | 34 | 34 | 2.64E-23 | 0.952  | 0.985 | v5.3 vs. v7.1 | HCP |
| SUM_caudalmiddlefrontal_surfavg     | ICC3 | 0.9938 | 322.56 | 34 | 34 | 2.38E-34 | 0.989  | 0.997 | v6.0          | HCP |
| SUM_caudalmiddlefrontal_surfavg     | ICC2 | 0.9947 | 391.27 | 34 | 34 | 9.11E-36 | 0.991  | 0.997 | v6.0 vs. v7.1 | HCP |
| SUM_caudalmiddlefrontal_surfavg     | ICC3 | 0.9950 | 399.52 | 34 | 34 | 6.40E-36 | 0.991  | 0.997 | v7.1          | HCP |
| SUM_cuneus_surfavg                  | ICC3 | 0.9562 | 44.63  | 34 | 34 | 5.18E-20 | 0.924  | 0.975 | v5.3          | HCP |
| SUM_cuneus_surfavg                  | ICC2 | 0.6562 | 7.13   | 34 | 34 | 5.55E-08 | 0.287  | 0.823 | v5.3 vs. v6.0 | HCP |
| SUM_cuneus_surfavg                  | ICC2 | 0.6334 | 8.27   | 34 | 34 | 7.62E-09 | 0.120  | 0.829 | v5.3 vs. v7.1 | HCP |
| SUM_cuneus_surfavg                  | ICC3 | 0.9889 | 178.54 | 34 | 34 | 5.12E-30 | 0.980  | 0.994 | v6.0          | HCP |
| SUM_cuneus_surfavg                  | ICC2 | 0.9824 | 202.73 | 34 | 34 | 6.03E-31 | 0.918  | 0.993 | v6.0 vs. v7.1 | HCP |
| SUM_cuneus_surfavg                  | ICC3 | 0.9874 | 158.20 | 34 | 34 | 3.91E-29 | 0.978  | 0.993 | v7.1          | HCP |
| SUM_entorhinal_surfavg              | ICC3 | 0.9222 | 24.72  | 34 | 34 | 6.81E-16 | 0.866  | 0.955 | v5.3          | HCP |
| SUM_entorhinal_surfavg              | ICC2 | 0.8273 | 14.89  | 34 | 34 | 1.67E-12 | 0.597  | 0.915 | v5.3 vs. v6.0 | HCP |
| SUM_entorhinal_surfavg              | ICC2 | 0.8145 | 10.35  | 34 | 34 | 3.39E-10 | 0.692  | 0.891 | v5.3 vs. v7.1 | HCP |
| SUM_entorhinal_surfavg              | ICC3 | 0.9453 | 35.58  | 34 | 34 | 2.04E-18 | 0.905  | 0.969 | v6.0          | HCP |

|                              |      |        |        |    |    |          |        |       |               |     |
|------------------------------|------|--------|--------|----|----|----------|--------|-------|---------------|-----|
| SUM_entorhinal_surfavg       | ICC2 | 0.9159 | 28.81  | 34 | 34 | 6.00E-17 | 0.820  | 0.957 | v6.0 vs. v7.1 | HCP |
| SUM_entorhinal_surfavg       | ICC3 | 0.9154 | 22.65  | 34 | 34 | 2.68E-15 | 0.855  | 0.951 | v7.1          | HCP |
| SUM_frontalpole_surfavg      | ICC3 | 0.8103 | 9.54   | 34 | 34 | 1.06E-09 | 0.687  | 0.888 | v5.3          | HCP |
| SUM_frontalpole_surfavg      | ICC2 | 0.3331 | 10.41  | 34 | 34 | 3.12E-10 | -0.042 | 0.659 | v5.3 vs. v6.0 | HCP |
| SUM_frontalpole_surfavg      | ICC2 | 0.1930 | 7.71   | 34 | 34 | 1.95E-08 | -0.030 | 0.487 | v5.3 vs. v7.1 | HCP |
| SUM_frontalpole_surfavg      | ICC3 | 0.8582 | 13.10  | 34 | 34 | 1.12E-11 | 0.762  | 0.917 | v6.0          | HCP |
| SUM_frontalpole_surfavg      | ICC2 | 0.7072 | 16.36  | 34 | 34 | 4.03E-13 | 0.029  | 0.887 | v6.0 vs. v7.1 | HCP |
| SUM_frontalpole_surfavg      | ICC3 | 0.8884 | 16.93  | 34 | 34 | 2.41E-13 | 0.810  | 0.935 | v7.1          | HCP |
| SUM_fusiform_surfavg         | ICC3 | 0.9791 | 94.63  | 34 | 34 | 2.13E-25 | 0.963  | 0.988 | v5.3          | HCP |
| SUM_fusiform_surfavg         | ICC2 | 0.8752 | 29.04  | 34 | 34 | 5.31E-17 | 0.498  | 0.950 | v5.3 vs. v6.0 | HCP |
| SUM_fusiform_surfavg         | ICC2 | 0.8992 | 28.29  | 34 | 34 | 8.04E-17 | 0.716  | 0.954 | v5.3 vs. v7.1 | HCP |
| SUM_fusiform_surfavg         | ICC3 | 0.9930 | 286.72 | 34 | 34 | 1.74E-33 | 0.988  | 0.996 | v6.0          | HCP |
| SUM_fusiform_surfavg         | ICC2 | 0.9898 | 366.77 | 34 | 34 | 2.72E-35 | 0.946  | 0.996 | v6.0 vs. v7.1 | HCP |
| SUM_fusiform_surfavg         | ICC3 | 0.9956 | 455.91 | 34 | 34 | 6.85E-37 | 0.992  | 0.998 | v7.1          | HCP |
| SUM_inferiorparietal_surfavg | ICC3 | 0.9943 | 351.73 | 34 | 34 | 5.52E-35 | 0.990  | 0.997 | v5.3          | HCP |
| SUM_inferiorparietal_surfavg | ICC2 | 0.9077 | 35.02  | 34 | 34 | 2.64E-18 | 0.675  | 0.961 | v5.3 vs. v6.0 | HCP |
| SUM_inferiorparietal_surfavg | ICC2 | 0.9219 | 31.95  | 34 | 34 | 1.15E-17 | 0.825  | 0.961 | v5.3 vs. v7.1 | HCP |
| SUM_inferiorparietal_surfavg | ICC3 | 0.9957 | 463.40 | 34 | 34 | 5.20E-37 | 0.992  | 0.998 | v6.0          | HCP |
| SUM_inferiorparietal_surfavg | ICC2 | 0.9897 | 264.65 | 34 | 34 | 6.75E-33 | 0.972  | 0.995 | v6.0 vs. v7.1 | HCP |
| SUM_inferiorparietal_surfavg | ICC3 | 0.9976 | 839.31 | 34 | 34 | 2.21E-41 | 0.996  | 0.999 | v7.1          | HCP |
| SUM_inferiortemporal_surfavg | ICC3 | 0.9919 | 247.30 | 34 | 34 | 2.12E-32 | 0.986  | 0.995 | v5.3          | HCP |
| SUM_inferiortemporal_surfavg | ICC2 | 0.9396 | 56.85  | 34 | 34 | 9.86E-22 | 0.753  | 0.976 | v5.3 vs. v6.0 | HCP |
| SUM_inferiortemporal_surfavg | ICC2 | 0.9182 | 69.91  | 34 | 34 | 3.25E-23 | 0.359  | 0.973 | v5.3 vs. v7.1 | HCP |
| SUM_inferiortemporal_surfavg | ICC3 | 0.9908 | 216.84 | 34 | 34 | 1.94E-31 | 0.984  | 0.995 | v6.0          | HCP |
| SUM_inferiortemporal_surfavg | ICC2 | 0.9876 | 257.37 | 34 | 34 | 1.08E-32 | 0.954  | 0.995 | v6.0 vs. v7.1 | HCP |
| SUM_inferiortemporal_surfavg | ICC3 | 0.9928 | 277.15 | 34 | 34 | 3.10E-33 | 0.987  | 0.996 | v7.1          | HCP |
| SUM_insula_surfavg           | ICC3 | 0.8639 | 13.70  | 34 | 34 | 5.80E-12 | 0.771  | 0.921 | v5.3          | HCP |
| SUM_insula_surfavg           | ICC2 | 0.8360 | 14.41  | 34 | 34 | 2.73E-12 | 0.661  | 0.914 | v5.3 vs. v6.0 | HCP |
| SUM_insula_surfavg           | ICC2 | 0.9109 | 23.14  | 34 | 34 | 1.92E-15 | 0.844  | 0.949 | v5.3 vs. v7.1 | HCP |
| SUM_insula_surfavg           | ICC3 | 0.8625 | 13.54  | 34 | 34 | 6.87E-12 | 0.769  | 0.920 | v6.0          | HCP |
| SUM_insula_surfavg           | ICC2 | 0.8974 | 20.29  | 34 | 34 | 1.49E-14 | 0.819  | 0.942 | v6.0 vs. v7.1 | HCP |
| SUM_insula_surfavg           | ICC3 | 0.9277 | 26.68  | 34 | 34 | 2.04E-16 | 0.875  | 0.959 | v7.1          | HCP |
| SUM_isthmuscingulate_surfavg | ICC3 | 0.9245 | 25.49  | 34 | 34 | 4.20E-16 | 0.870  | 0.957 | v5.3          | HCP |
| SUM_isthmuscingulate_surfavg | ICC2 | 0.9002 | 19.22  | 34 | 34 | 3.44E-14 | 0.831  | 0.942 | v5.3 vs. v6.0 | HCP |
| SUM_isthmuscingulate_surfavg | ICC2 | 0.8622 | 13.19  | 34 | 34 | 1.02E-11 | 0.768  | 0.920 | v5.3 vs. v7.1 | HCP |
| SUM_isthmuscingulate_surfavg | ICC3 | 0.9863 | 144.50 | 34 | 34 | 1.79E-28 | 0.976  | 0.992 | v6.0          | HCP |
| SUM_isthmuscingulate_surfavg | ICC2 | 0.9791 | 101.37 | 34 | 34 | 6.75E-26 | 0.963  | 0.988 | v6.0 vs. v7.1 | HCP |
| SUM_isthmuscingulate_surfavg | ICC3 | 0.9898 | 194.68 | 34 | 34 | 1.19E-30 | 0.982  | 0.994 | v7.1          | HCP |
| SUM_lateraloccipital_surfavg | ICC3 | 0.9806 | 101.94 | 34 | 34 | 6.15E-26 | 0.966  | 0.989 | v5.3          | HCP |
| SUM_lateraloccipital_surfavg | ICC2 | 0.7494 | 13.73  | 34 | 34 | 5.60E-12 | 0.229  | 0.894 | v5.3 vs. v6.0 | HCP |
| SUM_lateraloccipital_surfavg | ICC2 | 0.7243 | 14.50  | 34 | 34 | 2.48E-12 | 0.109  | 0.889 | v5.3 vs. v7.1 | HCP |
| SUM_lateraloccipital_surfavg | ICC3 | 0.9949 | 393.02 | 34 | 34 | 8.44E-36 | 0.991  | 0.997 | v6.0          | HCP |
| SUM_lateraloccipital_surfavg | ICC2 | 0.9873 | 185.41 | 34 | 34 | 2.72E-30 | 0.974  | 0.993 | v6.0 vs. v7.1 | HCP |
| SUM_lateraloccipital_surfavg | ICC3 | 0.9940 | 333.24 | 34 | 34 | 1.37E-34 | 0.989  | 0.997 | v7.1          | HCP |

|                                  |      |        |        |    |    |          |        |       |               |     |
|----------------------------------|------|--------|--------|----|----|----------|--------|-------|---------------|-----|
| SUM_lateralorbitofrontal_surfavg | ICC3 | 0.9539 | 42.43  | 34 | 34 | 1.18E-19 | 0.920  | 0.974 | v5.3          | HCP |
| SUM_lateralorbitofrontal_surfavg | ICC2 | 0.9531 | 43.64  | 34 | 34 | 7.46E-20 | 0.918  | 0.973 | v5.3 vs. v6.0 | HCP |
| SUM_lateralorbitofrontal_surfavg | ICC2 | 0.8974 | 37.53  | 34 | 34 | 8.64E-19 | 0.530  | 0.960 | v5.3 vs. v7.1 | HCP |
| SUM_lateralorbitofrontal_surfavg | ICC3 | 0.9347 | 29.63  | 34 | 34 | 3.86E-17 | 0.887  | 0.963 | v6.0          | HCP |
| SUM_lateralorbitofrontal_surfavg | ICC2 | 0.9476 | 85.25  | 34 | 34 | 1.21E-24 | 0.652  | 0.981 | v6.0 vs. v7.1 | HCP |
| SUM_lateralorbitofrontal_surfavg | ICC3 | 0.9566 | 45.06  | 34 | 34 | 4.43E-20 | 0.924  | 0.975 | v7.1          | HCP |
| SUM_lingual_surfavg              | ICC3 | 0.9860 | 142.28 | 34 | 34 | 2.32E-28 | 0.975  | 0.992 | v5.3          | HCP |
| SUM_lingual_surfavg              | ICC2 | 0.8860 | 19.20  | 34 | 34 | 3.51E-14 | 0.788  | 0.937 | v5.3 vs. v6.0 | HCP |
| SUM_lingual_surfavg              | ICC2 | 0.8564 | 22.43  | 34 | 34 | 3.13E-15 | 0.525  | 0.939 | v5.3 vs. v7.1 | HCP |
| SUM_lingual_surfavg              | ICC3 | 0.9915 | 233.29 | 34 | 34 | 5.67E-32 | 0.985  | 0.995 | v6.0          | HCP |
| SUM_lingual_surfavg              | ICC2 | 0.9804 | 393.52 | 34 | 34 | 8.26E-36 | 0.634  | 0.994 | v6.0 vs. v7.1 | HCP |
| SUM_lingual_surfavg              | ICC3 | 0.9935 | 307.25 | 34 | 34 | 5.42E-34 | 0.989  | 0.996 | v7.1          | HCP |
| SUM_medialorbitofrontal_surfavg  | ICC3 | 0.9555 | 43.93  | 34 | 34 | 6.71E-20 | 0.922  | 0.975 | v5.3          | HCP |
| SUM_medialorbitofrontal_surfavg  | ICC2 | 0.8776 | 19.73  | 34 | 34 | 2.29E-14 | 0.739  | 0.937 | v5.3 vs. v6.0 | HCP |
| SUM_medialorbitofrontal_surfavg  | ICC2 | 0.6450 | 18.52  | 34 | 34 | 6.10E-14 | -0.036 | 0.866 | v5.3 vs. v7.1 | HCP |
| SUM_medialorbitofrontal_surfavg  | ICC3 | 0.9184 | 23.51  | 34 | 34 | 1.50E-15 | 0.860  | 0.953 | v6.0          | HCP |
| SUM_medialorbitofrontal_surfavg  | ICC2 | 0.7773 | 24.64  | 34 | 34 | 7.17E-16 | 0.064  | 0.920 | v6.0 vs. v7.1 | HCP |
| SUM_medialorbitofrontal_surfavg  | ICC3 | 0.9543 | 42.78  | 34 | 34 | 1.03E-19 | 0.920  | 0.974 | v7.1          | HCP |
| SUM_middletemporal_surfavg       | ICC3 | 0.9948 | 380.28 | 34 | 34 | 1.47E-35 | 0.991  | 0.997 | v5.3          | HCP |
| SUM_middletemporal_surfavg       | ICC2 | 0.9429 | 98.14  | 34 | 34 | 1.16E-25 | 0.492  | 0.981 | v5.3 vs. v6.0 | HCP |
| SUM_middletemporal_surfavg       | ICC2 | 0.8944 | 80.25  | 34 | 34 | 3.30E-24 | 0.125  | 0.968 | v5.3 vs. v7.1 | HCP |
| SUM_middletemporal_surfavg       | ICC3 | 0.9938 | 319.54 | 34 | 34 | 2.80E-34 | 0.989  | 0.996 | v6.0          | HCP |
| SUM_middletemporal_surfavg       | ICC2 | 0.9841 | 362.92 | 34 | 34 | 3.25E-35 | 0.799  | 0.995 | v6.0 vs. v7.1 | HCP |
| SUM_middletemporal_surfavg       | ICC3 | 0.9970 | 655.76 | 34 | 34 | 1.45E-39 | 0.995  | 0.998 | v7.1          | HCP |
| SUM_paracentral_surfavg          | ICC3 | 0.9690 | 63.45  | 34 | 34 | 1.61E-22 | 0.946  | 0.982 | v5.3          | HCP |
| SUM_paracentral_surfavg          | ICC2 | 0.8881 | 16.64  | 34 | 34 | 3.12E-13 | 0.810  | 0.935 | v5.3 vs. v6.0 | HCP |
| SUM_paracentral_surfavg          | ICC2 | 0.9029 | 19.15  | 34 | 34 | 3.63E-14 | 0.834  | 0.944 | v5.3 vs. v7.1 | HCP |
| SUM_paracentral_surfavg          | ICC3 | 0.9734 | 74.15  | 34 | 34 | 1.22E-23 | 0.953  | 0.985 | v6.0          | HCP |
| SUM_paracentral_surfavg          | ICC2 | 0.9881 | 261.84 | 34 | 34 | 8.08E-33 | 0.958  | 0.995 | v6.0 vs. v7.1 | HCP |
| SUM_paracentral_surfavg          | ICC3 | 0.9865 | 147.41 | 34 | 34 | 1.28E-28 | 0.976  | 0.992 | v7.1          | HCP |
| SUM parahippocampal_surfavg      | ICC3 | 0.8775 | 15.33  | 34 | 34 | 1.08E-12 | 0.793  | 0.929 | v5.3          | HCP |
| SUM parahippocampal_surfavg      | ICC2 | 0.7444 | 9.75   | 34 | 34 | 7.90E-10 | 0.441  | 0.871 | v5.3 vs. v6.0 | HCP |
| SUM parahippocampal_surfavg      | ICC2 | 0.6832 | 9.93   | 34 | 34 | 6.08E-10 | 0.171  | 0.857 | v5.3 vs. v7.1 | HCP |
| SUM parahippocampal_surfavg      | ICC3 | 0.9525 | 41.13  | 34 | 34 | 1.96E-19 | 0.917  | 0.973 | v6.0          | HCP |
| SUM parahippocampal_surfavg      | ICC2 | 0.9404 | 51.17  | 34 | 34 | 5.55E-21 | 0.806  | 0.974 | v6.0 vs. v7.1 | HCP |
| SUM parahippocampal_surfavg      | ICC3 | 0.9561 | 44.55  | 34 | 34 | 5.33E-20 | 0.923  | 0.975 | v7.1          | HCP |
| SUM_parsopercularis_surfavg      | ICC3 | 0.9814 | 106.72 | 34 | 34 | 2.86E-26 | 0.967  | 0.989 | v5.3          | HCP |
| SUM_parsopercularis_surfavg      | ICC2 | 0.9200 | 44.10  | 34 | 34 | 6.30E-20 | 0.667  | 0.968 | v5.3 vs. v6.0 | HCP |
| SUM_parsopercularis_surfavg      | ICC2 | 0.8380 | 12.75  | 34 | 34 | 1.67E-11 | 0.716  | 0.908 | v5.3 vs. v7.1 | HCP |
| SUM_parsopercularis_surfavg      | ICC3 | 0.9952 | 412.94 | 34 | 34 | 3.66E-36 | 0.991  | 0.997 | v6.0          | HCP |
| SUM_parsopercularis_surfavg      | ICC2 | 0.8905 | 17.02  | 34 | 34 | 2.22E-13 | 0.814  | 0.937 | v6.0 vs. v7.1 | HCP |
| SUM_parsopercularis_surfavg      | ICC3 | 0.9909 | 218.28 | 34 | 34 | 1.74E-31 | 0.984  | 0.995 | v7.1          | HCP |
| SUM_parsorbitalis_surfavg        | ICC3 | 0.9715 | 69.10  | 34 | 34 | 3.94E-23 | 0.950  | 0.984 | v5.3          | HCP |
| SUM_parsorbitalis_surfavg        | ICC2 | 0.7168 | 37.96  | 34 | 34 | 7.19E-19 | -0.023 | 0.905 | v5.3 vs. v6.0 | HCP |

|                                      |      |        |        |    |    |          |        |       |               |     |
|--------------------------------------|------|--------|--------|----|----|----------|--------|-------|---------------|-----|
| SUM_parsorbitalis_surfavg            | ICC2 | 0.5967 | 32.49  | 34 | 34 | 8.80E-18 | -0.028 | 0.852 | v5.3 vs. v7.1 | HCP |
| SUM_parsorbitalis_surfavg            | ICC3 | 0.9816 | 107.72 | 34 | 34 | 2.45E-26 | 0.968  | 0.990 | v6.0          | HCP |
| SUM_parsorbitalis_surfavg            | ICC2 | 0.9455 | 106.29 | 34 | 34 | 3.06E-26 | 0.487  | 0.982 | v6.0 vs. v7.1 | HCP |
| SUM_parsorbitalis_surfavg            | ICC3 | 0.9826 | 113.87 | 34 | 34 | 9.69E-27 | 0.969  | 0.990 | v7.1          | HCP |
| SUM_parstriangularis_surfavg         | ICC3 | 0.9695 | 64.55  | 34 | 34 | 1.21E-22 | 0.947  | 0.983 | v5.3          | HCP |
| SUM_parstriangularis_surfavg         | ICC2 | 0.8738 | 19.93  | 34 | 34 | 1.97E-14 | 0.713  | 0.937 | v5.3 vs. v6.0 | HCP |
| SUM_parstriangularis_surfavg         | ICC2 | 0.7967 | 13.43  | 34 | 34 | 7.72E-12 | 0.489  | 0.904 | v5.3 vs. v7.1 | HCP |
| SUM_parstriangularis_surfavg         | ICC3 | 0.9863 | 145.05 | 34 | 34 | 1.68E-28 | 0.976  | 0.992 | v6.0          | HCP |
| SUM_parstriangularis_surfavg         | ICC2 | 0.9746 | 113.61 | 34 | 34 | 1.01E-26 | 0.925  | 0.988 | v6.0 vs. v7.1 | HCP |
| SUM_parstriangularis_surfavg         | ICC3 | 0.9898 | 196.02 | 34 | 34 | 1.06E-30 | 0.982  | 0.994 | v7.1          | HCP |
| SUM_pericalcarine_surfavg            | ICC3 | 0.9732 | 73.49  | 34 | 34 | 1.42E-23 | 0.953  | 0.985 | v5.3          | HCP |
| SUM_pericalcarine_surfavg            | ICC2 | 0.7895 | 9.95   | 34 | 34 | 5.88E-10 | 0.625  | 0.881 | v5.3 vs. v6.0 | HCP |
| SUM_pericalcarine_surfavg            | ICC2 | 0.7934 | 10.88  | 34 | 34 | 1.66E-10 | 0.601  | 0.888 | v5.3 vs. v7.1 | HCP |
| SUM_pericalcarine_surfavg            | ICC3 | 0.9912 | 227.32 | 34 | 34 | 8.77E-32 | 0.985  | 0.995 | v6.0          | HCP |
| SUM_pericalcarine_surfavg            | ICC2 | 0.9900 | 219.21 | 34 | 34 | 1.62E-31 | 0.982  | 0.994 | v6.0 vs. v7.1 | HCP |
| SUM_pericalcarine_surfavg            | ICC3 | 0.9905 | 209.43 | 34 | 34 | 3.49E-31 | 0.983  | 0.995 | v7.1          | HCP |
| SUM_postcentral_surfavg              | ICC3 | 0.9929 | 280.01 | 34 | 34 | 2.60E-33 | 0.987  | 0.996 | v5.3          | HCP |
| SUM_postcentral_surfavg              | ICC2 | 0.9441 | 39.63  | 34 | 34 | 3.57E-19 | 0.895  | 0.969 | v5.3 vs. v6.0 | HCP |
| SUM_postcentral_surfavg              | ICC2 | 0.8566 | 12.93  | 34 | 34 | 1.35E-11 | 0.760  | 0.916 | v5.3 vs. v7.1 | HCP |
| SUM_postcentral_surfavg              | ICC3 | 0.9961 | 513.48 | 34 | 34 | 9.14E-38 | 0.993  | 0.998 | v6.0          | HCP |
| SUM_postcentral_surfavg              | ICC2 | 0.9648 | 55.54  | 34 | 34 | 1.45E-21 | 0.939  | 0.980 | v6.0 vs. v7.1 | HCP |
| SUM_postcentral_surfavg              | ICC3 | 0.9881 | 167.47 | 34 | 34 | 1.50E-29 | 0.979  | 0.993 | v7.1          | HCP |
| SUM_posteriorcingulate_surfavg       | ICC3 | 0.9649 | 56.05  | 34 | 34 | 1.24E-21 | 0.939  | 0.980 | v5.3          | HCP |
| SUM_posteriorcingulate_surfavg       | ICC2 | 0.8652 | 14.21  | 34 | 34 | 3.34E-12 | 0.774  | 0.921 | v5.3 vs. v6.0 | HCP |
| SUM_posteriorcingulate_surfavg       | ICC2 | 0.8918 | 17.14  | 34 | 34 | 1.99E-13 | 0.816  | 0.937 | v5.3 vs. v7.1 | HCP |
| SUM_posteriorcingulate_surfavg       | ICC3 | 0.9915 | 235.39 | 34 | 34 | 4.87E-32 | 0.985  | 0.995 | v6.0          | HCP |
| SUM_posteriorcingulate_surfavg       | ICC2 | 0.9867 | 200.84 | 34 | 34 | 7.07E-31 | 0.966  | 0.994 | v6.0 vs. v7.1 | HCP |
| SUM_posteriorcingulate_surfavg       | ICC3 | 0.9879 | 164.56 | 34 | 34 | 2.02E-29 | 0.979  | 0.993 | v7.1          | HCP |
| SUM_precentral_surfavg               | ICC3 | 0.9897 | 193.08 | 34 | 34 | 1.37E-30 | 0.982  | 0.994 | v5.3          | HCP |
| SUM_precentral_surfavg               | ICC2 | 0.9835 | 117.10 | 34 | 34 | 6.06E-27 | 0.971  | 0.991 | v5.3 vs. v6.0 | HCP |
| SUM_precentral_surfavg               | ICC2 | 0.9822 | 108.27 | 34 | 34 | 2.25E-26 | 0.969  | 0.990 | v5.3 vs. v7.1 | HCP |
| SUM_precentral_surfavg               | ICC3 | 0.9912 | 225.95 | 34 | 34 | 9.71E-32 | 0.984  | 0.995 | v6.0          | HCP |
| SUM_precentral_surfavg               | ICC2 | 0.9974 | 759.33 | 34 | 34 | 1.21E-40 | 0.995  | 0.999 | v6.0 vs. v7.1 | HCP |
| SUM_precentral_surfavg               | ICC3 | 0.9925 | 266.02 | 34 | 34 | 6.18E-33 | 0.987  | 0.996 | v7.1          | HCP |
| SUM_precuneus_surfavg                | ICC3 | 0.9923 | 257.14 | 34 | 34 | 1.10E-32 | 0.986  | 0.996 | v5.3          | HCP |
| SUM_precuneus_surfavg                | ICC2 | 0.8538 | 12.81  | 34 | 34 | 1.55E-11 | 0.756  | 0.915 | v5.3 vs. v6.0 | HCP |
| SUM_precuneus_surfavg                | ICC2 | 0.7536 | 7.08   | 34 | 34 | 6.04E-08 | 0.603  | 0.853 | v5.3 vs. v7.1 | HCP |
| SUM_precuneus_surfavg                | ICC3 | 0.9967 | 610.29 | 34 | 34 | 4.90E-39 | 0.994  | 0.998 | v6.0          | HCP |
| SUM_precuneus_surfavg                | ICC2 | 0.9664 | 56.91  | 34 | 34 | 9.69E-22 | 0.941  | 0.981 | v6.0 vs. v7.1 | HCP |
| SUM_precuneus_surfavg                | ICC3 | 0.9939 | 328.30 | 34 | 34 | 1.77E-34 | 0.989  | 0.997 | v7.1          | HCP |
| SUM_rostralanteriorcingulate_surfavg | ICC3 | 0.9793 | 95.45  | 34 | 34 | 1.84E-25 | 0.964  | 0.988 | v5.3          | HCP |
| SUM_rostralanteriorcingulate_surfavg | ICC2 | 0.8675 | 48.50  | 34 | 34 | 1.33E-20 | 0.151  | 0.957 | v5.3 vs. v6.0 | HCP |
| SUM_rostralanteriorcingulate_surfavg | ICC2 | 0.8892 | 26.60  | 34 | 34 | 2.13E-16 | 0.671  | 0.950 | v5.3 vs. v7.1 | HCP |
| SUM_rostralanteriorcingulate_surfavg | ICC3 | 0.9780 | 90.10  | 34 | 34 | 4.81E-25 | 0.961  | 0.988 | v6.0          | HCP |

|                                      |      |        |         |    |    |          |        |       |               |     |
|--------------------------------------|------|--------|---------|----|----|----------|--------|-------|---------------|-----|
| SUM_rostralanteriorcingulate_surfavg | ICC2 | 0.9677 | 87.27   | 34 | 34 | 8.19E-25 | 0.909  | 0.985 | v6.0 vs. v7.1 | HCP |
| SUM_rostralanteriorcingulate_surfavg | ICC3 | 0.9861 | 142.83  | 34 | 34 | 2.18E-28 | 0.975  | 0.992 | v7.1          | HCP |
| SUM_rostralmiddlefrontal_surfavg     | ICC3 | 0.9960 | 502.82  | 34 | 34 | 1.30E-37 | 0.993  | 0.998 | v5.3          | HCP |
| SUM_rostralmiddlefrontal_surfavg     | ICC2 | 0.9828 | 115.88  | 34 | 34 | 7.23E-27 | 0.970  | 0.990 | v5.3 vs. v6.0 | HCP |
| SUM_rostralmiddlefrontal_surfavg     | ICC2 | 0.9648 | 65.76   | 34 | 34 | 8.94E-23 | 0.930  | 0.981 | v5.3 vs. v7.1 | HCP |
| SUM_rostralmiddlefrontal_surfavg     | ICC3 | 0.9970 | 664.98  | 34 | 34 | 1.14E-39 | 0.995  | 0.998 | v6.0          | HCP |
| SUM_rostralmiddlefrontal_surfavg     | ICC2 | 0.9638 | 72.27   | 34 | 34 | 1.87E-23 | 0.912  | 0.982 | v6.0 vs. v7.1 | HCP |
| SUM_rostralmiddlefrontal_surfavg     | ICC3 | 0.9974 | 767.59  | 34 | 34 | 1.00E-40 | 0.995  | 0.999 | v7.1          | HCP |
| SUM_superiorfrontal_surfavg          | ICC3 | 0.9953 | 423.38  | 34 | 34 | 2.40E-36 | 0.992  | 0.997 | v5.3          | HCP |
| SUM_superiorfrontal_surfavg          | ICC2 | 0.9663 | 80.48   | 34 | 34 | 3.15E-24 | 0.912  | 0.984 | v5.3 vs. v6.0 | HCP |
| SUM_superiorfrontal_surfavg          | ICC2 | 0.9320 | 50.68   | 34 | 34 | 6.49E-21 | 0.723  | 0.972 | v5.3 vs. v7.1 | HCP |
| SUM_superiorfrontal_surfavg          | ICC3 | 0.9965 | 569.29  | 34 | 34 | 1.59E-38 | 0.994  | 0.998 | v6.0          | HCP |
| SUM_superiorfrontal_surfavg          | ICC2 | 0.9730 | 91.21   | 34 | 34 | 3.93E-25 | 0.941  | 0.986 | v6.0 vs. v7.1 | HCP |
| SUM_superiorfrontal_surfavg          | ICC3 | 0.9976 | 833.15  | 34 | 34 | 2.50E-41 | 0.996  | 0.999 | v7.1          | HCP |
| SUM_superiorparietal_surfavg         | ICC3 | 0.9940 | 329.98  | 34 | 34 | 1.62E-34 | 0.989  | 0.997 | v5.3          | HCP |
| SUM_superiorparietal_surfavg         | ICC2 | 0.9242 | 39.63   | 34 | 34 | 3.57E-19 | 0.762  | 0.967 | v5.3 vs. v6.0 | HCP |
| SUM_superiorparietal_surfavg         | ICC2 | 0.9063 | 26.89   | 34 | 34 | 1.79E-16 | 0.786  | 0.953 | v5.3 vs. v7.1 | HCP |
| SUM_superiorparietal_surfavg         | ICC3 | 0.9963 | 540.74  | 34 | 34 | 3.81E-38 | 0.993  | 0.998 | v6.0          | HCP |
| SUM_superiorparietal_surfavg         | ICC2 | 0.9665 | 57.27   | 34 | 34 | 8.73E-22 | 0.941  | 0.981 | v6.0 vs. v7.1 | HCP |
| SUM_superiorparietal_surfavg         | ICC3 | 0.9929 | 279.70  | 34 | 34 | 2.65E-33 | 0.987  | 0.996 | v7.1          | HCP |
| SUM_superiortemporal_surfavg         | ICC3 | 0.9893 | 186.42  | 34 | 34 | 2.48E-30 | 0.981  | 0.994 | v5.3          | HCP |
| SUM_superiortemporal_surfavg         | ICC2 | 0.9309 | 106.80  | 34 | 34 | 2.83E-26 | 0.284  | 0.979 | v5.3 vs. v6.0 | HCP |
| SUM_superiortemporal_surfavg         | ICC2 | 0.8858 | 116.78  | 34 | 34 | 6.35E-27 | 0.048  | 0.967 | v5.3 vs. v7.1 | HCP |
| SUM_superiortemporal_surfavg         | ICC3 | 0.9909 | 217.74  | 34 | 34 | 1.81E-31 | 0.984  | 0.995 | v6.0          | HCP |
| SUM_superiortemporal_surfavg         | ICC2 | 0.9867 | 512.34  | 34 | 34 | 9.49E-38 | 0.770  | 0.996 | v6.0 vs. v7.1 | HCP |
| SUM_superiortemporal_surfavg         | ICC3 | 0.9950 | 398.35  | 34 | 34 | 6.72E-36 | 0.991  | 0.997 | v7.1          | HCP |
| SUM_supramarginal_surfavg            | ICC3 | 0.9955 | 439.46  | 34 | 34 | 1.28E-36 | 0.992  | 0.997 | v5.3          | HCP |
| SUM_supramarginal_surfavg            | ICC2 | 0.9532 | 43.03   | 34 | 34 | 9.38E-20 | 0.919  | 0.973 | v5.3 vs. v6.0 | HCP |
| SUM_supramarginal_surfavg            | ICC2 | 0.9401 | 34.49   | 34 | 34 | 3.37E-18 | 0.895  | 0.966 | v5.3 vs. v7.1 | HCP |
| SUM_supramarginal_surfavg            | ICC3 | 0.9967 | 613.53  | 34 | 34 | 4.48E-39 | 0.994  | 0.998 | v6.0          | HCP |
| SUM_supramarginal_surfavg            | ICC2 | 0.9887 | 177.92  | 34 | 34 | 5.43E-30 | 0.980  | 0.994 | v6.0 vs. v7.1 | HCP |
| SUM_supramarginal_surfavg            | ICC3 | 0.9977 | 861.52  | 34 | 34 | 1.42E-41 | 0.996  | 0.999 | v7.1          | HCP |
| SUM_SurfArea                         | ICC3 | 0.9984 | 1268.40 | 34 | 34 | 2.00E-44 | 0.997  | 0.999 | v5.3          | HCP |
| SUM_SurfArea                         | ICC2 | 0.9966 | 1981.66 | 34 | 34 | 1.02E-47 | 0.934  | 0.999 | v5.3 vs. v6.0 | HCP |
| SUM_SurfArea                         | ICC2 | 0.9825 | 1449.50 | 34 | 34 | 2.07E-45 | 0.305  | 0.995 | v5.3 vs. v7.1 | HCP |
| SUM_SurfArea                         | ICC3 | 0.9980 | 977.44  | 34 | 34 | 1.66E-42 | 0.996  | 0.999 | v6.0          | HCP |
| SUM_SurfArea                         | ICC2 | 0.9934 | 4313.97 | 34 | 34 | 1.87E-53 | 0.535  | 0.998 | v6.0 vs. v7.1 | HCP |
| SUM_SurfArea                         | ICC3 | 0.9985 | 1363.00 | 34 | 34 | 5.89E-45 | 0.997  | 0.999 | v7.1          | HCP |
| SUM_temporalpole_surfavg             | ICC3 | 0.8755 | 15.06   | 34 | 34 | 1.41E-12 | 0.789  | 0.928 | v5.3          | HCP |
| SUM_temporalpole_surfavg             | ICC2 | 0.7618 | 11.75   | 34 | 34 | 5.48E-11 | 0.396  | 0.888 | v5.3 vs. v6.0 | HCP |
| SUM_temporalpole_surfavg             | ICC2 | 0.5848 | 9.14    | 34 | 34 | 1.95E-09 | -0.007 | 0.817 | v5.3 vs. v7.1 | HCP |
| SUM_temporalpole_surfavg             | ICC3 | 0.9157 | 22.72   | 34 | 34 | 2.55E-15 | 0.855  | 0.952 | v6.0          | HCP |
| SUM_temporalpole_surfavg             | ICC2 | 0.8120 | 18.64   | 34 | 34 | 5.53E-14 | 0.349  | 0.922 | v6.0 vs. v7.1 | HCP |
| SUM_temporalpole_surfavg             | ICC3 | 0.9217 | 24.55   | 34 | 34 | 7.57E-16 | 0.865  | 0.955 | v7.1          | HCP |



|                              |      |        |       |    |    |          |       |       |               |     |
|------------------------------|------|--------|-------|----|----|----------|-------|-------|---------------|-----|
| SUM_transversetemporal_surfg | ICC3 | 0.9632 | 53.37 | 34 | 34 | 2.78E-21 | 0.936 | 0.979 | v5.3          | HCP |
| SUM_transversetemporal_surfg | ICC2 | 0.8481 | 14.34 | 34 | 34 | 2.94E-12 | 0.718 | 0.916 | v5.3 vs. v6.0 | HCP |
| SUM_transversetemporal_surfg | ICC2 | 0.9042 | 19.37 | 34 | 34 | 3.06E-14 | 0.836 | 0.945 | v5.3 vs. v7.1 | HCP |
| SUM_transversetemporal_surfg | ICC3 | 0.9452 | 35.51 | 34 | 34 | 2.10E-18 | 0.905 | 0.969 | v6.0          | HCP |
| SUM_transversetemporal_surfg | ICC2 | 0.9206 | 39.69 | 34 | 34 | 3.49E-19 | 0.729 | 0.966 | v6.0 vs. v7.1 | HCP |
| SUM_transversetemporal_surfg | ICC3 | 0.9263 | 26.13 | 34 | 34 | 2.83E-16 | 0.873 | 0.958 | v7.1          | HCP |

**Table S4. KKI specific ICCs and associated statistics.**

| ROI                                  | Type | ICC   | F      | df1 | df2 | p        | lower bound | upper bound | comparison    | dataset |
|--------------------------------------|------|-------|--------|-----|-----|----------|-------------|-------------|---------------|---------|
| AVG_Accumbens                        | ICC3 | 0.780 | 8.08   | 20  | 20  | 9.44E-06 | 0.584       | 0.890       | v5.3          | KKI     |
| AVG_Accumbens                        | ICC2 | 0.438 | 10.70  | 20  | 20  | 9.31E-07 | -0.055      | 0.755       | v5.3 vs. v6.0 | KKI     |
| AVG_Accumbens                        | ICC2 | 0.666 | 12.24  | 20  | 20  | 2.96E-07 | 0.025       | 0.872       | v5.3 vs. v7.1 | KKI     |
| AVG_Accumbens                        | ICC3 | 0.922 | 24.64  | 20  | 20  | 5.44E-10 | 0.841       | 0.963       | v6.0          | KKI     |
| AVG_Accumbens                        | ICC2 | 0.737 | 13.23  | 20  | 20  | 1.50E-07 | 0.178       | 0.897       | v6.0 vs. v7.1 | KKI     |
| AVG_Accumbens                        | ICC3 | 0.813 | 9.68   | 20  | 20  | 2.15E-06 | 0.640       | 0.907       | v7.1          | KKI     |
| AVG_Amygdala                         | ICC3 | 0.929 | 27.13  | 20  | 20  | 2.21E-10 | 0.855       | 0.966       | v5.3          | KKI     |
| AVG_Amygdala                         | ICC2 | 0.753 | 14.05  | 20  | 20  | 8.87E-08 | 0.208       | 0.904       | v5.3 vs. v6.0 | KKI     |
| AVG_Amygdala                         | ICC2 | 0.760 | 10.23  | 20  | 20  | 1.36E-06 | 0.441       | 0.891       | v5.3 vs. v7.1 | KKI     |
| AVG_Amygdala                         | ICC3 | 0.961 | 50.03  | 20  | 20  | 6.56E-13 | 0.919       | 0.981       | v6.0          | KKI     |
| AVG_Amygdala                         | ICC2 | 0.933 | 31.90  | 20  | 20  | 4.83E-11 | 0.859       | 0.968       | v6.0 vs. v7.1 | KKI     |
| AVG_Amygdala                         | ICC3 | 0.949 | 38.00  | 20  | 20  | 9.19E-12 | 0.894       | 0.976       | v7.1          | KKI     |
| AVG_bankssts_thickavg                | ICC3 | 0.920 | 23.92  | 20  | 20  | 7.15E-10 | 0.837       | 0.961       | v5.3          | KKI     |
| AVG_bankssts_thickavg                | ICC2 | 0.950 | 47.01  | 20  | 20  | 1.20E-12 | 0.882       | 0.977       | v5.3 vs. v6.0 | KKI     |
| AVG_bankssts_thickavg                | ICC2 | 0.955 | 45.15  | 20  | 20  | 1.76E-12 | 0.907       | 0.978       | v5.3 vs. v7.1 | KKI     |
| AVG_bankssts_thickavg                | ICC3 | 0.941 | 33.10  | 20  | 20  | 3.40E-11 | 0.879       | 0.972       | v6.0          | KKI     |
| AVG_bankssts_thickavg                | ICC2 | 0.945 | 70.77  | 20  | 20  | 2.27E-14 | 0.694       | 0.981       | v6.0 vs. v7.1 | KKI     |
| AVG_bankssts_thickavg                | ICC3 | 0.920 | 23.85  | 20  | 20  | 7.35E-10 | 0.836       | 0.961       | v7.1          | KKI     |
| AVG_caudalanteriorcingulate_thickavg | ICC3 | 0.950 | 39.29  | 20  | 20  | 6.67E-12 | 0.897       | 0.976       | v5.3          | KKI     |
| AVG_caudalanteriorcingulate_thickavg | ICC2 | 0.935 | 45.62  | 20  | 20  | 1.59E-12 | 0.779       | 0.974       | v5.3 vs. v6.0 | KKI     |
| AVG_caudalanteriorcingulate_thickavg | ICC2 | 0.490 | 12.51  | 20  | 20  | 2.45E-07 | -0.054      | 0.791       | v5.3 vs. v7.1 | KKI     |
| AVG_caudalanteriorcingulate_thickavg | ICC3 | 0.955 | 43.83  | 20  | 20  | 2.34E-12 | 0.908       | 0.979       | v6.0          | KKI     |
| AVG_caudalanteriorcingulate_thickavg | ICC2 | 0.619 | 18.06  | 20  | 20  | 9.43E-09 | -0.043      | 0.862       | v6.0 vs. v7.1 | KKI     |
| AVG_caudalanteriorcingulate_thickavg | ICC3 | 0.965 | 56.05  | 20  | 20  | 2.19E-13 | 0.927       | 0.983       | v7.1          | KKI     |
| AVG_caudalmiddlefrontal_thickavg     | ICC3 | 0.694 | 5.54   | 20  | 20  | 1.70E-04 | 0.445       | 0.843       | v5.3          | KKI     |
| AVG_caudalmiddlefrontal_thickavg     | ICC2 | 0.811 | 17.19  | 20  | 20  | 1.47E-08 | 0.371       | 0.926       | v5.3 vs. v6.0 | KKI     |
| AVG_caudalmiddlefrontal_thickavg     | ICC2 | 0.869 | 28.25  | 20  | 20  | 1.52E-10 | 0.441       | 0.953       | v5.3 vs. v7.1 | KKI     |
| AVG_caudalmiddlefrontal_thickavg     | ICC3 | 0.777 | 7.98   | 20  | 20  | 1.04E-05 | 0.580       | 0.889       | v6.0          | KKI     |
| AVG_caudalmiddlefrontal_thickavg     | ICC2 | 0.915 | 22.06  | 20  | 20  | 1.51E-09 | 0.829       | 0.959       | v6.0 vs. v7.1 | KKI     |
| AVG_caudalmiddlefrontal_thickavg     | ICC3 | 0.784 | 8.25   | 20  | 20  | 7.98E-06 | 0.590       | 0.892       | v7.1          | KKI     |
| AVG_Caudate                          | ICC3 | 0.986 | 138.85 | 20  | 20  | 3.04E-17 | 0.970       | 0.993       | v5.3          | KKI     |
| AVG_Caudate                          | ICC2 | 0.856 | 293.89 | 20  | 20  | 1.81E-20 | 0.016       | 0.962       | v5.3 vs. v6.0 | KKI     |
| AVG_Caudate                          | ICC2 | 0.922 | 215.12 | 20  | 20  | 4.00E-19 | 0.077       | 0.979       | v5.3 vs. v7.1 | KKI     |
| AVG_Caudate                          | ICC3 | 0.996 | 487.36 | 20  | 20  | 1.18E-22 | 0.991       | 0.998       | v6.0          | KKI     |
| AVG_Caudate                          | ICC2 | 0.980 | 551.88 | 20  | 20  | 3.41E-23 | 0.481       | 0.995       | v6.0 vs. v7.1 | KKI     |
| AVG_Caudate                          | ICC3 | 0.994 | 326.03 | 20  | 20  | 6.44E-21 | 0.987       | 0.997       | v7.1          | KKI     |
| AVG_cuneus_thickavg                  | ICC3 | 0.970 | 66.15  | 20  | 20  | 4.39E-14 | 0.938       | 0.986       | v5.3          | KKI     |
| AVG_cuneus_thickavg                  | ICC2 | 0.797 | 81.43  | 20  | 20  | 5.77E-15 | -0.004      | 0.941       | v5.3 vs. v6.0 | KKI     |
| AVG_cuneus_thickavg                  | ICC2 | 0.828 | 27.41  | 20  | 20  | 2.01E-10 | 0.188       | 0.942       | v5.3 vs. v7.1 | KKI     |
| AVG_cuneus_thickavg                  | ICC3 | 0.964 | 55.22  | 20  | 20  | 2.53E-13 | 0.926       | 0.983       | v6.0          | KKI     |
| AVG_cuneus_thickavg                  | ICC2 | 0.950 | 65.39  | 20  | 20  | 4.91E-14 | 0.796       | 0.981       | v6.0 vs. v7.1 | KKI     |

|                               |      |       |       |    |    |          |        |       |               |     |
|-------------------------------|------|-------|-------|----|----|----------|--------|-------|---------------|-----|
| AVG_cuneus_thickavg           | ICC3 | 0.953 | 41.27 | 20 | 20 | 4.18E-12 | 0.902  | 0.977 | v7.1          | KKI |
| AVG_entorhinal_thickavg       | ICC3 | 0.751 | 7.04  | 20 | 20 | 2.81E-05 | 0.536  | 0.875 | v5.3          | KKI |
| AVG_entorhinal_thickavg       | ICC2 | 0.909 | 24.93 | 20 | 20 | 4.87E-10 | 0.796  | 0.958 | v5.3 vs. v6.0 | KKI |
| AVG_entorhinal_thickavg       | ICC2 | 0.568 | 11.72 | 20 | 20 | 4.28E-07 | -0.050 | 0.830 | v5.3 vs. v7.1 | KKI |
| AVG_entorhinal_thickavg       | ICC3 | 0.840 | 11.53 | 20 | 20 | 4.91E-07 | 0.689  | 0.922 | v6.0          | KKI |
| AVG_entorhinal_thickavg       | ICC2 | 0.713 | 19.58 | 20 | 20 | 4.52E-09 | -0.002 | 0.900 | v6.0 vs. v7.1 | KKI |
| AVG_entorhinal_thickavg       | ICC3 | 0.771 | 7.75  | 20 | 20 | 1.31E-05 | 0.570  | 0.885 | v7.1          | KKI |
| AVG_frontalpole_thickavg      | ICC3 | 0.877 | 15.26 | 20 | 20 | 4.26E-08 | 0.756  | 0.940 | v5.3          | KKI |
| AVG_frontalpole_thickavg      | ICC2 | 0.825 | 13.37 | 20 | 20 | 1.37E-07 | 0.606  | 0.920 | v5.3 vs. v6.0 | KKI |
| AVG_frontalpole_thickavg      | ICC2 | 0.840 | 13.31 | 20 | 20 | 1.42E-07 | 0.673  | 0.923 | v5.3 vs. v7.1 | KKI |
| AVG_frontalpole_thickavg      | ICC3 | 0.875 | 14.96 | 20 | 20 | 5.08E-08 | 0.751  | 0.939 | v6.0          | KKI |
| AVG_frontalpole_thickavg      | ICC2 | 0.893 | 17.40 | 20 | 20 | 1.32E-08 | 0.788  | 0.948 | v6.0 vs. v7.1 | KKI |
| AVG_frontalpole_thickavg      | ICC3 | 0.817 | 9.95  | 20 | 20 | 1.71E-06 | 0.648  | 0.910 | v7.1          | KKI |
| AVG_fusiform_thickavg         | ICC3 | 0.923 | 25.05 | 20 | 20 | 4.66E-10 | 0.844  | 0.963 | v5.3          | KKI |
| AVG_fusiform_thickavg         | ICC2 | 0.957 | 43.10 | 20 | 20 | 2.75E-12 | 0.910  | 0.979 | v5.3 vs. v6.0 | KKI |
| AVG_fusiform_thickavg         | ICC2 | 0.772 | 16.24 | 20 | 20 | 2.45E-08 | 0.204  | 0.914 | v5.3 vs. v7.1 | KKI |
| AVG_fusiform_thickavg         | ICC3 | 0.923 | 24.83 | 20 | 20 | 5.07E-10 | 0.842  | 0.963 | v6.0          | KKI |
| AVG_fusiform_thickavg         | ICC2 | 0.820 | 42.64 | 20 | 20 | 3.05E-12 | 0.035  | 0.945 | v6.0 vs. v7.1 | KKI |
| AVG_fusiform_thickavg         | ICC3 | 0.884 | 16.27 | 20 | 20 | 2.41E-08 | 0.769  | 0.944 | v7.1          | KKI |
| AVG_Hippocampus               | ICC3 | 0.965 | 56.40 | 20 | 20 | 2.06E-13 | 0.927  | 0.983 | v5.3          | KKI |
| AVG_Hippocampus               | ICC2 | 0.842 | 44.07 | 20 | 20 | 2.23E-12 | 0.077  | 0.951 | v5.3 vs. v6.0 | KKI |
| AVG_Hippocampus               | ICC2 | 0.908 | 54.38 | 20 | 20 | 2.93E-13 | 0.383  | 0.971 | v5.3 vs. v7.1 | KKI |
| AVG_Hippocampus               | ICC3 | 0.958 | 46.17 | 20 | 20 | 1.42E-12 | 0.912  | 0.980 | v6.0          | KKI |
| AVG_Hippocampus               | ICC2 | 0.965 | 91.87 | 20 | 20 | 1.77E-15 | 0.860  | 0.987 | v6.0 vs. v7.1 | KKI |
| AVG_Hippocampus               | ICC3 | 0.954 | 42.76 | 20 | 20 | 2.97E-12 | 0.905  | 0.978 | v7.1          | KKI |
| AVG_inferiorparietal_thickavg | ICC3 | 0.752 | 7.07  | 20 | 20 | 2.70E-05 | 0.538  | 0.875 | v5.3          | KKI |
| AVG_inferiorparietal_thickavg | ICC2 | 0.744 | 10.68 | 20 | 20 | 9.47E-07 | 0.340  | 0.890 | v5.3 vs. v6.0 | KKI |
| AVG_inferiorparietal_thickavg | ICC2 | 0.823 | 11.36 | 20 | 20 | 5.61E-07 | 0.653  | 0.913 | v5.3 vs. v7.1 | KKI |
| AVG_inferiorparietal_thickavg | ICC3 | 0.795 | 8.78  | 20 | 20 | 4.81E-06 | 0.610  | 0.898 | v6.0          | KKI |
| AVG_inferiorparietal_thickavg | ICC2 | 0.920 | 50.54 | 20 | 20 | 5.95E-13 | 0.560  | 0.972 | v6.0 vs. v7.1 | KKI |
| AVG_inferiorparietal_thickavg | ICC3 | 0.806 | 9.30  | 20 | 20 | 3.00E-06 | 0.628  | 0.904 | v7.1          | KKI |
| AVG_inferiortemporal_thickavg | ICC3 | 0.933 | 28.85 | 20 | 20 | 1.25E-10 | 0.863  | 0.968 | v5.3          | KKI |
| AVG_inferiortemporal_thickavg | ICC2 | 0.928 | 29.64 | 20 | 20 | 9.66E-11 | 0.850  | 0.966 | v5.3 vs. v6.0 | KKI |
| AVG_inferiortemporal_thickavg | ICC2 | 0.889 | 28.66 | 20 | 20 | 1.33E-10 | 0.604  | 0.957 | v5.3 vs. v7.1 | KKI |
| AVG_inferiortemporal_thickavg | ICC3 | 0.896 | 18.15 | 20 | 20 | 9.00E-09 | 0.790  | 0.949 | v6.0          | KKI |
| AVG_inferiortemporal_thickavg | ICC2 | 0.940 | 45.05 | 20 | 20 | 1.80E-12 | 0.828  | 0.975 | v6.0 vs. v7.1 | KKI |
| AVG_inferiortemporal_thickavg | ICC3 | 0.946 | 35.75 | 20 | 20 | 1.64E-11 | 0.888  | 0.974 | v7.1          | KKI |
| AVG_insula_thickavg           | ICC3 | 0.888 | 16.91 | 20 | 20 | 1.70E-08 | 0.777  | 0.946 | v5.3          | KKI |
| AVG_insula_thickavg           | ICC2 | 0.842 | 12.47 | 20 | 20 | 2.51E-07 | 0.691  | 0.922 | v5.3 vs. v6.0 | KKI |
| AVG_insula_thickavg           | ICC2 | 0.735 | 16.80 | 20 | 20 | 1.81E-08 | 0.069  | 0.904 | v5.3 vs. v7.1 | KKI |
| AVG_insula_thickavg           | ICC3 | 0.857 | 13.03 | 20 | 20 | 1.71E-07 | 0.720  | 0.930 | v6.0          | KKI |
| AVG_insula_thickavg           | ICC2 | 0.752 | 10.07 | 20 | 20 | 1.55E-06 | 0.413  | 0.888 | v6.0 vs. v7.1 | KKI |
| AVG_insula_thickavg           | ICC3 | 0.873 | 14.76 | 20 | 20 | 5.74E-08 | 0.748  | 0.938 | v7.1          | KKI |
| AVG_isthmuscingulate_thickavg | ICC3 | 0.794 | 8.72  | 20 | 20 | 5.11E-06 | 0.608  | 0.898 | v5.3          | KKI |

|                                   |      |       |          |    |    |          |        |       |               |     |
|-----------------------------------|------|-------|----------|----|----|----------|--------|-------|---------------|-----|
| AVG_isthmuscingulate_thickavg     | ICC2 | 0.740 | 10.86    | 20 | 20 | 8.23E-07 | 0.313  | 0.890 | v5.3 vs. v6.0 | KKI |
| AVG_isthmuscingulate_thickavg     | ICC2 | 0.463 | 5.44     | 20 | 20 | 1.93E-04 | -0.035 | 0.745 | v5.3 vs. v7.1 | KKI |
| AVG_isthmuscingulate_thickavg     | ICC3 | 0.930 | 27.60    | 20 | 20 | 1.89E-10 | 0.857  | 0.966 | v6.0          | KKI |
| AVG_isthmuscingulate_thickavg     | ICC2 | 0.813 | 19.96    | 20 | 20 | 3.79E-09 | 0.284  | 0.931 | v6.0 vs. v7.1 | KKI |
| AVG_isthmuscingulate_thickavg     | ICC3 | 0.905 | 20.16    | 20 | 20 | 3.46E-09 | 0.809  | 0.954 | v7.1          | KKI |
| AVG_lateraloccipital_thickavg     | ICC3 | 0.938 | 31.41    | 20 | 20 | 5.59E-11 | 0.873  | 0.970 | v5.3          | KKI |
| AVG_lateraloccipital_thickavg     | ICC2 | 0.790 | 46.89    | 20 | 20 | 1.23E-12 | -0.003 | 0.936 | v5.3 vs. v6.0 | KKI |
| AVG_lateraloccipital_thickavg     | ICC2 | 0.838 | 36.23    | 20 | 20 | 1.45E-11 | 0.119  | 0.948 | v5.3 vs. v7.1 | KKI |
| AVG_lateraloccipital_thickavg     | ICC3 | 0.913 | 21.92    | 20 | 20 | 1.61E-09 | 0.823  | 0.958 | v6.0          | KKI |
| AVG_lateraloccipital_thickavg     | ICC2 | 0.965 | 86.63    | 20 | 20 | 3.15E-15 | 0.870  | 0.986 | v6.0 vs. v7.1 | KKI |
| AVG_lateraloccipital_thickavg     | ICC3 | 0.941 | 32.86    | 20 | 20 | 3.65E-11 | 0.879  | 0.972 | v7.1          | KKI |
| AVG_lateralorbitofrontal_thickavg | ICC3 | 0.941 | 32.93    | 20 | 20 | 3.58E-11 | 0.879  | 0.972 | v5.3          | KKI |
| AVG_lateralorbitofrontal_thickavg | ICC2 | 0.923 | 27.00    | 20 | 20 | 2.31E-10 | 0.842  | 0.963 | v5.3 vs. v6.0 | KKI |
| AVG_lateralorbitofrontal_thickavg | ICC2 | 0.834 | 25.10    | 20 | 20 | 4.57E-10 | 0.267  | 0.942 | v5.3 vs. v7.1 | KKI |
| AVG_lateralorbitofrontal_thickavg | ICC3 | 0.933 | 28.71    | 20 | 20 | 1.30E-10 | 0.862  | 0.968 | v6.0          | KKI |
| AVG_lateralorbitofrontal_thickavg | ICC2 | 0.859 | 21.53    | 20 | 20 | 1.89E-09 | 0.540  | 0.944 | v6.0 vs. v7.1 | KKI |
| AVG_lateralorbitofrontal_thickavg | ICC3 | 0.925 | 25.79    | 20 | 20 | 3.56E-10 | 0.848  | 0.964 | v7.1          | KKI |
| AVG_LateralVentricle              | ICC3 | 1.000 | 4290.15  | 20 | 20 | 4.36E-32 | 0.999  | 1.000 | v5.3          | KKI |
| AVG_LateralVentricle              | ICC2 | 0.995 | 5747.89  | 20 | 20 | 2.34E-33 | 0.595  | 0.999 | v5.3 vs. v6.0 | KKI |
| AVG_LateralVentricle              | ICC2 | 0.993 | 5435.82  | 20 | 20 | 4.09E-33 | 0.480  | 0.998 | v5.3 vs. v7.1 | KKI |
| AVG_LateralVentricle              | ICC3 | 1.000 | 5105.60  | 20 | 20 | 7.65E-33 | 0.999  | 1.000 | v6.0          | KKI |
| AVG_LateralVentricle              | ICC2 | 1.000 | 11983.17 | 20 | 20 | 1.51E-36 | 0.998  | 1.000 | v6.0 vs. v7.1 | KKI |
| AVG_LateralVentricle              | ICC3 | 1.000 | 7202.68  | 20 | 20 | 2.45E-34 | 0.999  | 1.000 | v7.1          | KKI |
| AVG_lingual_thickavg              | ICC3 | 0.959 | 47.43    | 20 | 20 | 1.10E-12 | 0.914  | 0.980 | v5.3          | KKI |
| AVG_lingual_thickavg              | ICC2 | 0.897 | 33.44    | 20 | 20 | 3.09E-11 | 0.574  | 0.962 | v5.3 vs. v6.0 | KKI |
| AVG_lingual_thickavg              | ICC2 | 0.940 | 30.81    | 20 | 20 | 6.71E-11 | 0.876  | 0.971 | v5.3 vs. v7.1 | KKI |
| AVG_lingual_thickavg              | ICC3 | 0.937 | 30.86    | 20 | 20 | 6.62E-11 | 0.871  | 0.970 | v6.0          | KKI |
| AVG_lingual_thickavg              | ICC2 | 0.922 | 116.96   | 20 | 20 | 1.65E-16 | 0.170  | 0.978 | v6.0 vs. v7.1 | KKI |
| AVG_lingual_thickavg              | ICC3 | 0.946 | 36.00    | 20 | 20 | 1.53E-11 | 0.889  | 0.974 | v7.1          | KKI |
| AVG_medialorbitofrontal_thickavg  | ICC3 | 0.880 | 15.69    | 20 | 20 | 3.32E-08 | 0.762  | 0.942 | v5.3          | KKI |
| AVG_medialorbitofrontal_thickavg  | ICC2 | 0.877 | 14.61    | 20 | 20 | 6.28E-08 | 0.755  | 0.940 | v5.3 vs. v6.0 | KKI |
| AVG_medialorbitofrontal_thickavg  | ICC2 | 0.803 | 23.12    | 20 | 20 | 9.82E-10 | 0.156  | 0.932 | v5.3 vs. v7.1 | KKI |
| AVG_medialorbitofrontal_thickavg  | ICC3 | 0.922 | 24.62    | 20 | 20 | 5.49E-10 | 0.841  | 0.962 | v6.0          | KKI |
| AVG_medialorbitofrontal_thickavg  | ICC2 | 0.764 | 15.45    | 20 | 20 | 3.81E-08 | 0.200  | 0.911 | v6.0 vs. v7.1 | KKI |
| AVG_medialorbitofrontal_thickavg  | ICC3 | 0.907 | 20.48    | 20 | 20 | 2.99E-09 | 0.812  | 0.955 | v7.1          | KKI |
| AVG_middletemporal_thickavg       | ICC3 | 0.923 | 25.01    | 20 | 20 | 4.73E-10 | 0.843  | 0.963 | v5.3          | KKI |
| AVG_middletemporal_thickavg       | ICC2 | 0.887 | 21.71    | 20 | 20 | 1.75E-09 | 0.723  | 0.950 | v5.3 vs. v6.0 | KKI |
| AVG_middletemporal_thickavg       | ICC2 | 0.729 | 16.95    | 20 | 20 | 1.66E-08 | 0.051  | 0.902 | v5.3 vs. v7.1 | KKI |
| AVG_middletemporal_thickavg       | ICC3 | 0.910 | 21.30    | 20 | 20 | 2.09E-09 | 0.819  | 0.957 | v6.0          | KKI |
| AVG_middletemporal_thickavg       | ICC2 | 0.862 | 47.00    | 20 | 20 | 1.20E-12 | 0.128  | 0.958 | v6.0 vs. v7.1 | KKI |
| AVG_middletemporal_thickavg       | ICC3 | 0.921 | 24.18    | 20 | 20 | 6.47E-10 | 0.839  | 0.962 | v7.1          | KKI |
| AVG_Pallidum                      | ICC3 | 0.858 | 13.11    | 20 | 20 | 1.63E-07 | 0.721  | 0.931 | v5.3          | KKI |
| AVG_Pallidum                      | ICC2 | 0.234 | 3.96     | 20 | 20 | 1.69E-03 | -0.068 | 0.545 | v5.3 vs. v6.0 | KKI |
| AVG_Pallidum                      | ICC2 | 0.269 | 4.59     | 20 | 20 | 6.37E-04 | -0.068 | 0.590 | v5.3 vs. v7.1 | KKI |

|                               |      |       |        |    |    |          |       |       |               |     |
|-------------------------------|------|-------|--------|----|----|----------|-------|-------|---------------|-----|
| AVG Pallidum                  | ICC3 | 0.968 | 60.85  | 20 | 20 | 9.87E-14 | 0.933 | 0.985 | v6.0          | KKI |
| AVG_Pallidum                  | ICC2 | 0.891 | 16.63  | 20 | 20 | 1.98E-08 | 0.782 | 0.947 | v6.0 vs. v7.1 | KKI |
| AVG_Pallidum                  | ICC3 | 0.945 | 35.19  | 20 | 20 | 1.91E-11 | 0.886 | 0.974 | v7.1          | KKI |
| AVG_paracentral_thickavg      | ICC3 | 0.913 | 22.10  | 20 | 20 | 1.49E-09 | 0.825 | 0.958 | v5.3          | KKI |
| AVG_paracentral_thickavg      | ICC2 | 0.830 | 20.59  | 20 | 20 | 2.85E-09 | 0.369 | 0.936 | v5.3 vs. v6.0 | KKI |
| AVG_paracentral_thickavg      | ICC2 | 0.835 | 16.95  | 20 | 20 | 1.67E-08 | 0.530 | 0.931 | v5.3 vs. v7.1 | KKI |
| AVG_paracentral_thickavg      | ICC3 | 0.887 | 16.69  | 20 | 20 | 1.92E-08 | 0.774 | 0.945 | v6.0          | KKI |
| AVG_paracentral_thickavg      | ICC2 | 0.939 | 31.51  | 20 | 20 | 5.42E-11 | 0.877 | 0.971 | v6.0 vs. v7.1 | KKI |
| AVG_paracentral_thickavg      | ICC3 | 0.894 | 17.92  | 20 | 20 | 1.01E-08 | 0.788 | 0.949 | v7.1          | KKI |
| AVG parahippocampal_thickavg  | ICC3 | 0.902 | 19.43  | 20 | 20 | 4.85E-09 | 0.803 | 0.953 | v5.3          | KKI |
| AVG parahippocampal_thickavg  | ICC2 | 0.945 | 34.65  | 20 | 20 | 2.21E-11 | 0.888 | 0.974 | v5.3 vs. v6.0 | KKI |
| AVG parahippocampal_thickavg  | ICC2 | 0.776 | 23.29  | 20 | 20 | 9.18E-10 | 0.066 | 0.924 | v5.3 vs. v7.1 | KKI |
| AVG parahippocampal_thickavg  | ICC3 | 0.961 | 49.83  | 20 | 20 | 6.82E-13 | 0.918 | 0.981 | v6.0          | KKI |
| AVG parahippocampal_thickavg  | ICC2 | 0.810 | 38.98  | 20 | 20 | 7.21E-12 | 0.031 | 0.941 | v6.0 vs. v7.1 | KKI |
| AVG parahippocampal_thickavg  | ICC3 | 0.955 | 43.52  | 20 | 20 | 2.51E-12 | 0.907 | 0.979 | v7.1          | KKI |
| AVG_parsopercularis_thickavg  | ICC3 | 0.879 | 15.59  | 20 | 20 | 3.53E-08 | 0.760 | 0.941 | v5.3          | KKI |
| AVG_parsopercularis_thickavg  | ICC2 | 0.838 | 16.26  | 20 | 20 | 2.42E-08 | 0.575 | 0.930 | v5.3 vs. v6.0 | KKI |
| AVG_parsopercularis_thickavg  | ICC2 | 0.906 | 21.99  | 20 | 20 | 1.56E-09 | 0.808 | 0.955 | v5.3 vs. v7.1 | KKI |
| AVG_parsopercularis_thickavg  | ICC3 | 0.895 | 18.13  | 20 | 20 | 9.07E-09 | 0.790 | 0.949 | v6.0          | KKI |
| AVG_parsopercularis_thickavg  | ICC2 | 0.940 | 45.58  | 20 | 20 | 1.61E-12 | 0.824 | 0.975 | v6.0 vs. v7.1 | KKI |
| AVG_parsopercularis_thickavg  | ICC3 | 0.895 | 18.01  | 20 | 20 | 9.65E-09 | 0.789 | 0.949 | v7.1          | KKI |
| AVG_parsorbitalis_thickavg    | ICC3 | 0.932 | 28.25  | 20 | 20 | 1.52E-10 | 0.860 | 0.967 | v5.3          | KKI |
| AVG_parsorbitalis_thickavg    | ICC2 | 0.893 | 17.57  | 20 | 20 | 1.21E-08 | 0.788 | 0.948 | v5.3 vs. v6.0 | KKI |
| AVG_parsorbitalis_thickavg    | ICC2 | 0.925 | 24.62  | 20 | 20 | 5.47E-10 | 0.847 | 0.964 | v5.3 vs. v7.1 | KKI |
| AVG_parsorbitalis_thickavg    | ICC3 | 0.920 | 24.09  | 20 | 20 | 6.70E-10 | 0.838 | 0.962 | v6.0          | KKI |
| AVG_parsorbitalis_thickavg    | ICC2 | 0.967 | 63.49  | 20 | 20 | 6.53E-14 | 0.932 | 0.984 | v6.0 vs. v7.1 | KKI |
| AVG_parsorbitalis_thickavg    | ICC3 | 0.956 | 44.54  | 20 | 20 | 2.01E-12 | 0.909 | 0.979 | v7.1          | KKI |
| AVG_parstriangularis_thickavg | ICC3 | 0.946 | 35.71  | 20 | 20 | 1.66E-11 | 0.888 | 0.974 | v5.3          | KKI |
| AVG_parstriangularis_thickavg | ICC2 | 0.942 | 47.39  | 20 | 20 | 1.11E-12 | 0.831 | 0.976 | v5.3 vs. v6.0 | KKI |
| AVG_parstriangularis_thickavg | ICC2 | 0.949 | 45.26  | 20 | 20 | 1.72E-12 | 0.885 | 0.977 | v5.3 vs. v7.1 | KKI |
| AVG_parstriangularis_thickavg | ICC3 | 0.954 | 42.53  | 20 | 20 | 3.13E-12 | 0.905 | 0.978 | v6.0          | KKI |
| AVG_parstriangularis_thickavg | ICC2 | 0.964 | 54.61  | 20 | 20 | 2.81E-13 | 0.926 | 0.983 | v6.0 vs. v7.1 | KKI |
| AVG_parstriangularis_thickavg | ICC3 | 0.937 | 30.58  | 20 | 20 | 7.21E-11 | 0.870 | 0.970 | v7.1          | KKI |
| AVG_pericalcarine_thickavg    | ICC3 | 0.903 | 19.61  | 20 | 20 | 4.46E-09 | 0.805 | 0.953 | v5.3          | KKI |
| AVG_pericalcarine_thickavg    | ICC2 | 0.729 | 18.99  | 20 | 20 | 5.98E-09 | 0.025 | 0.905 | v5.3 vs. v6.0 | KKI |
| AVG_pericalcarine_thickavg    | ICC2 | 0.829 | 21.73  | 20 | 20 | 1.74E-09 | 0.325 | 0.937 | v5.3 vs. v7.1 | KKI |
| AVG_pericalcarine_thickavg    | ICC3 | 0.885 | 16.35  | 20 | 20 | 2.31E-08 | 0.770 | 0.944 | v6.0          | KKI |
| AVG_pericalcarine_thickavg    | ICC2 | 0.938 | 49.33  | 20 | 20 | 7.51E-13 | 0.780 | 0.976 | v6.0 vs. v7.1 | KKI |
| AVG_pericalcarine_thickavg    | ICC3 | 0.946 | 35.70  | 20 | 20 | 1.66E-11 | 0.888 | 0.974 | v7.1          | KKI |
| AVG_postcentral_thickavg      | ICC3 | 0.922 | 24.50  | 20 | 20 | 5.73E-10 | 0.840 | 0.962 | v5.3          | KKI |
| AVG_postcentral_thickavg      | ICC2 | 0.850 | 61.30  | 20 | 20 | 9.18E-14 | 0.042 | 0.956 | v5.3 vs. v6.0 | KKI |
| AVG_postcentral_thickavg      | ICC2 | 0.895 | 92.17  | 20 | 20 | 1.72E-15 | 0.094 | 0.970 | v5.3 vs. v7.1 | KKI |
| AVG_postcentral_thickavg      | ICC3 | 0.982 | 109.06 | 20 | 20 | 3.29E-16 | 0.962 | 0.991 | v6.0          | KKI |
| AVG_postcentral_thickavg      | ICC2 | 0.975 | 90.83  | 20 | 20 | 1.98E-15 | 0.942 | 0.988 | v6.0 vs. v7.1 | KKI |

|                                       |      |       |        |    |    |          |        |       |               |     |
|---------------------------------------|------|-------|--------|----|----|----------|--------|-------|---------------|-----|
| AVG_postcentral_thickavg              | ICC3 | 0.978 | 88.25  | 20 | 20 | 2.63E-15 | 0.953  | 0.989 | v7.1          | KKI |
| AVG_posteriorcingulate_thickavg       | ICC3 | 0.908 | 20.63  | 20 | 20 | 2.80E-09 | 0.813  | 0.955 | v5.3          | KKI |
| AVG_posteriorcingulate_thickavg       | ICC2 | 0.894 | 37.94  | 20 | 20 | 9.31E-12 | 0.470  | 0.963 | v5.3 vs. v6.0 | KKI |
| AVG_posteriorcingulate_thickavg       | ICC2 | 0.536 | 16.44  | 20 | 20 | 2.19E-08 | -0.047 | 0.821 | v5.3 vs. v7.1 | KKI |
| AVG_posteriorcingulate_thickavg       | ICC3 | 0.905 | 20.09  | 20 | 20 | 3.57E-09 | 0.809  | 0.954 | v6.0          | KKI |
| AVG_posteriorcingulate_thickavg       | ICC2 | 0.689 | 23.48  | 20 | 20 | 8.51E-10 | -0.029 | 0.895 | v6.0 vs. v7.1 | KKI |
| AVG_posteriorcingulate_thickavg       | ICC3 | 0.918 | 23.38  | 20 | 20 | 8.83E-10 | 0.833  | 0.961 | v7.1          | KKI |
| AVG_precentral_thickavg               | ICC3 | 0.735 | 6.56   | 20 | 20 | 4.80E-05 | 0.511  | 0.866 | v5.3          | KKI |
| AVG_precentral_thickavg               | ICC2 | 0.831 | 36.07  | 20 | 20 | 1.51E-11 | 0.096  | 0.946 | v5.3 vs. v6.0 | KKI |
| AVG_precentral_thickavg               | ICC2 | 0.817 | 11.16  | 20 | 20 | 6.51E-07 | 0.639  | 0.911 | v5.3 vs. v7.1 | KKI |
| AVG_precentral_thickavg               | ICC3 | 0.897 | 18.37  | 20 | 20 | 8.06E-09 | 0.793  | 0.950 | v6.0          | KKI |
| AVG_precentral_thickavg               | ICC2 | 0.887 | 20.24  | 20 | 20 | 3.34E-09 | 0.749  | 0.948 | v6.0 vs. v7.1 | KKI |
| AVG_precentral_thickavg               | ICC3 | 0.834 | 11.08  | 20 | 20 | 6.91E-07 | 0.678  | 0.918 | v7.1          | KKI |
| AVG_precuneus_thickavg                | ICC3 | 0.897 | 18.47  | 20 | 20 | 7.66E-09 | 0.794  | 0.950 | v5.3          | KKI |
| AVG_precuneus_thickavg                | ICC2 | 0.944 | 72.04  | 20 | 20 | 1.91E-14 | 0.675  | 0.981 | v5.3 vs. v6.0 | KKI |
| AVG_precuneus_thickavg                | ICC2 | 0.962 | 53.21  | 20 | 20 | 3.62E-13 | 0.921  | 0.982 | v5.3 vs. v7.1 | KKI |
| AVG_precuneus_thickavg                | ICC3 | 0.917 | 23.14  | 20 | 20 | 9.72E-10 | 0.832  | 0.960 | v6.0          | KKI |
| AVG_precuneus_thickavg                | ICC2 | 0.965 | 104.35 | 20 | 20 | 5.07E-16 | 0.819  | 0.988 | v6.0 vs. v7.1 | KKI |
| AVG_precuneus_thickavg                | ICC3 | 0.897 | 18.49  | 20 | 20 | 7.59E-09 | 0.794  | 0.950 | v7.1          | KKI |
| AVG_Putamen                           | ICC3 | 0.952 | 40.71  | 20 | 20 | 4.76E-12 | 0.901  | 0.977 | v5.3          | KKI |
| AVG_Putamen                           | ICC2 | 0.342 | 16.69  | 20 | 20 | 1.91E-08 | -0.027 | 0.686 | v5.3 vs. v6.0 | KKI |
| AVG_Putamen                           | ICC2 | 0.351 | 14.56  | 20 | 20 | 6.45E-08 | -0.032 | 0.693 | v5.3 vs. v7.1 | KKI |
| AVG_Putamen                           | ICC3 | 0.996 | 475.84 | 20 | 20 | 1.49E-22 | 0.991  | 0.998 | v6.0          | KKI |
| AVG_Putamen                           | ICC2 | 0.980 | 120.47 | 20 | 20 | 1.23E-16 | 0.949  | 0.991 | v6.0 vs. v7.1 | KKI |
| AVG_Putamen                           | ICC3 | 0.987 | 158.04 | 20 | 20 | 8.48E-18 | 0.973  | 0.994 | v7.1          | KKI |
| AVG_rostralanteriorcingulate_thickavg | ICC3 | 0.911 | 21.49  | 20 | 20 | 1.92E-09 | 0.820  | 0.957 | v5.3          | KKI |
| AVG_rostralanteriorcingulate_thickavg | ICC2 | 0.861 | 14.07  | 20 | 20 | 8.75E-08 | 0.728  | 0.932 | v5.3 vs. v6.0 | KKI |
| AVG_rostralanteriorcingulate_thickavg | ICC2 | 0.445 | 7.98   | 20 | 20 | 1.04E-05 | -0.065 | 0.752 | v5.3 vs. v7.1 | KKI |
| AVG_rostralanteriorcingulate_thickavg | ICC3 | 0.916 | 22.82  | 20 | 20 | 1.11E-09 | 0.830  | 0.960 | v6.0          | KKI |
| AVG_rostralanteriorcingulate_thickavg | ICC2 | 0.547 | 18.57  | 20 | 20 | 7.32E-09 | -0.043 | 0.828 | v6.0 vs. v7.1 | KKI |
| AVG_rostralanteriorcingulate_thickavg | ICC3 | 0.917 | 23.10  | 20 | 20 | 9.88E-10 | 0.832  | 0.960 | v7.1          | KKI |
| AVG_rostralmiddlefrontal_thickavg     | ICC3 | 0.767 | 7.60   | 20 | 20 | 1.54E-05 | 0.563  | 0.883 | v5.3          | KKI |
| AVG_rostralmiddlefrontal_thickavg     | ICC2 | 0.774 | 21.80  | 20 | 20 | 1.69E-09 | 0.082  | 0.922 | v5.3 vs. v6.0 | KKI |
| AVG_rostralmiddlefrontal_thickavg     | ICC2 | 0.826 | 30.11  | 20 | 20 | 8.32E-11 | 0.136  | 0.943 | v5.3 vs. v7.1 | KKI |
| AVG_rostralmiddlefrontal_thickavg     | ICC3 | 0.869 | 14.28  | 20 | 20 | 7.69E-08 | 0.741  | 0.936 | v6.0          | KKI |
| AVG_rostralmiddlefrontal_thickavg     | ICC2 | 0.951 | 41.78  | 20 | 20 | 3.71E-12 | 0.900  | 0.977 | v6.0 vs. v7.1 | KKI |
| AVG_rostralmiddlefrontal_thickavg     | ICC3 | 0.854 | 12.70  | 20 | 20 | 2.15E-07 | 0.713  | 0.928 | v7.1          | KKI |
| AVG_superiorfrontal_thickavg          | ICC3 | 0.825 | 10.43  | 20 | 20 | 1.15E-06 | 0.662  | 0.914 | v5.3          | KKI |
| AVG_superiorfrontal_thickavg          | ICC2 | 0.945 | 35.67  | 20 | 20 | 1.68E-11 | 0.888  | 0.974 | v5.3 vs. v6.0 | KKI |
| AVG_superiorfrontal_thickavg          | ICC2 | 0.955 | 42.05  | 20 | 20 | 3.49E-12 | 0.907  | 0.979 | v5.3 vs. v7.1 | KKI |
| AVG_superiorfrontal_thickavg          | ICC3 | 0.870 | 14.38  | 20 | 20 | 7.22E-08 | 0.743  | 0.937 | v6.0          | KKI |
| AVG_superiorfrontal_thickavg          | ICC2 | 0.964 | 63.93  | 20 | 20 | 6.11E-14 | 0.919  | 0.984 | v6.0 vs. v7.1 | KKI |
| AVG_superiorfrontal_thickavg          | ICC3 | 0.865 | 13.77  | 20 | 20 | 1.06E-07 | 0.733  | 0.934 | v7.1          | KKI |
| AVG_superiorparietal_thickavg         | ICC3 | 0.872 | 14.57  | 20 | 20 | 6.43E-08 | 0.745  | 0.937 | v5.3          | KKI |

|                                 |      |       |          |    |    |           |       |       |               |     |
|---------------------------------|------|-------|----------|----|----|-----------|-------|-------|---------------|-----|
| AVG_superiorparietal_thickavg   | ICC2 | 0.881 | 42.57    | 20 | 20 | 3.10E-12  | 0.277 | 0.961 | v5.3 vs. v6.0 | KKI |
| AVG_superiorparietal_thickavg   | ICC2 | 0.896 | 47.66    | 20 | 20 | 1.05E-12  | 0.341 | 0.966 | v5.3 vs. v7.1 | KKI |
| AVG_superiorparietal_thickavg   | ICC3 | 0.882 | 16.02    | 20 | 20 | 2.77E-08  | 0.766 | 0.943 | v6.0          | KKI |
| AVG_superiorparietal_thickavg   | ICC2 | 0.985 | 129.86   | 20 | 20 | 5.89E-17  | 0.968 | 0.993 | v6.0 vs. v7.1 | KKI |
| AVG_superiorparietal_thickavg   | ICC3 | 0.889 | 17.08    | 20 | 20 | 1.56E-08  | 0.779 | 0.946 | v7.1          | KKI |
| AVG_superiortemporal_thickavg   | ICC3 | 0.976 | 81.41    | 20 | 20 | 5.79E-15  | 0.949 | 0.989 | v5.3          | KKI |
| AVG_superiortemporal_thickavg   | ICC2 | 0.986 | 138.53   | 20 | 20 | 3.11E-17  | 0.971 | 0.994 | v5.3 vs. v6.0 | KKI |
| AVG_superiortemporal_thickavg   | ICC2 | 0.973 | 125.03   | 20 | 20 | 8.56E-17  | 0.885 | 0.990 | v5.3 vs. v7.1 | KKI |
| AVG_superiortemporal_thickavg   | ICC3 | 0.970 | 64.93    | 20 | 20 | 5.25E-14  | 0.937 | 0.986 | v6.0          | KKI |
| AVG_superiortemporal_thickavg   | ICC2 | 0.976 | 144.74   | 20 | 20 | 2.02E-17  | 0.892 | 0.991 | v6.0 vs. v7.1 | KKI |
| AVG_superiortemporal_thickavg   | ICC3 | 0.971 | 67.48    | 20 | 20 | 3.61E-14  | 0.939 | 0.986 | v7.1          | KKI |
| AVG_supramarginal_thickavg      | ICC3 | 0.865 | 13.83    | 20 | 20 | 1.01E-07  | 0.734 | 0.934 | v5.3          | KKI |
| AVG_supramarginal_thickavg      | ICC2 | 0.892 | 22.02    | 20 | 20 | 1.54E-09  | 0.746 | 0.951 | v5.3 vs. v6.0 | KKI |
| AVG_supramarginal_thickavg      | ICC2 | 0.892 | 17.07    | 20 | 20 | 1.57E-08  | 0.785 | 0.948 | v5.3 vs. v7.1 | KKI |
| AVG_supramarginal_thickavg      | ICC3 | 0.878 | 15.39    | 20 | 20 | 3.96E-08  | 0.757 | 0.941 | v6.0          | KKI |
| AVG_supramarginal_thickavg      | ICC2 | 0.941 | 46.77    | 20 | 20 | 1.26E-12  | 0.827 | 0.976 | v6.0 vs. v7.1 | KKI |
| AVG_supramarginal_thickavg      | ICC3 | 0.858 | 13.07    | 20 | 20 | 1.67E-07  | 0.720 | 0.930 | v7.1          | KKI |
| AVG_temporalpole_thickavg       | ICC3 | 0.782 | 8.19     | 20 | 20 | 8.44E-06  | 0.588 | 0.891 | v5.3          | KKI |
| AVG_temporalpole_thickavg       | ICC2 | 0.766 | 9.73     | 20 | 20 | 2.06E-06  | 0.496 | 0.890 | v5.3 vs. v6.0 | KKI |
| AVG_temporalpole_thickavg       | ICC2 | 0.730 | 17.80    | 20 | 20 | 1.07E-08  | 0.040 | 0.904 | v5.3 vs. v7.1 | KKI |
| AVG_temporalpole_thickavg       | ICC3 | 0.763 | 7.45     | 20 | 20 | 1.80E-05  | 0.556 | 0.881 | v6.0          | KKI |
| AVG_temporalpole_thickavg       | ICC2 | 0.722 | 7.80     | 20 | 20 | 1.25E-05  | 0.436 | 0.865 | v6.0 vs. v7.1 | KKI |
| AVG_temporalpole_thickavg       | ICC3 | 0.543 | 3.38     | 20 | 20 | 4.48E-03  | 0.228 | 0.755 | v7.1          | KKI |
| AVG_Thalamus                    | ICC3 | 0.915 | 22.40    | 20 | 20 | 1.32E-09  | 0.827 | 0.959 | v5.3          | KKI |
| AVG_Thalamus                    | ICC2 | 0.836 | 16.30    | 20 | 20 | 2.37E-08  | 0.562 | 0.930 | v5.3 vs. v6.0 | KKI |
| AVG_Thalamus                    | ICC2 | 0.852 | 12.32    | 20 | 20 | 2.79E-07  | 0.712 | 0.927 | v5.3 vs. v7.1 | KKI |
| AVG_Thalamus                    | ICC3 | 0.961 | 50.68    | 20 | 20 | 5.80E-13  | 0.920 | 0.982 | v6.0          | KKI |
| AVG_Thalamus                    | ICC2 | 0.844 | 26.67    | 20 | 20 | 2.60E-10  | 0.295 | 0.945 | v6.0 vs. v7.1 | KKI |
| AVG_Thalamus                    | ICC3 | 0.976 | 84.06    | 20 | 20 | 4.23E-15  | 0.951 | 0.989 | v7.1          | KKI |
| AVG_Thickness                   | ICC3 | 0.928 | 26.84    | 20 | 20 | 2.45E-10  | 0.853 | 0.966 | v5.3          | KKI |
| AVG_Thickness                   | ICC2 | 0.925 | 63.45    | 20 | 20 | 6.58E-14  | 0.479 | 0.976 | v5.3 vs. v6.0 | KKI |
| AVG_Thickness                   | ICC2 | 0.971 | 65.67    | 20 | 20 | 4.70E-14  | 0.939 | 0.986 | v5.3 vs. v7.1 | KKI |
| AVG_Thickness                   | ICC3 | 0.942 | 33.42    | 20 | 20 | 3.11E-11  | 0.880 | 0.972 | v6.0          | KKI |
| AVG_Thickness                   | ICC2 | 0.939 | 95.57    | 20 | 20 | 1.20E-15  | 0.434 | 0.982 | v6.0 vs. v7.1 | KKI |
| AVG_Thickness                   | ICC3 | 0.934 | 29.33    | 20 | 20 | 1.07E-10  | 0.865 | 0.968 | v7.1          | KKI |
| AVG_transversetemporal_thickavg | ICC3 | 0.920 | 24.07    | 20 | 20 | 6.76E-10  | 0.838 | 0.962 | v5.3          | KKI |
| AVG_transversetemporal_thickavg | ICC2 | 0.863 | 56.09    | 20 | 20 | 2.17E-13  | 0.085 | 0.959 | v5.3 vs. v6.0 | KKI |
| AVG_transversetemporal_thickavg | ICC2 | 0.841 | 40.85    | 20 | 20 | 4.60E-12  | 0.094 | 0.951 | v5.3 vs. v7.1 | KKI |
| AVG_transversetemporal_thickavg | ICC3 | 0.887 | 16.77    | 20 | 20 | 1.83E-08  | 0.775 | 0.945 | v6.0          | KKI |
| AVG_transversetemporal_thickavg | ICC2 | 0.979 | 88.70    | 20 | 20 | 2.50E-15  | 0.955 | 0.990 | v6.0 vs. v7.1 | KKI |
| AVG_transversetemporal_thickavg | ICC3 | 0.869 | 14.32    | 20 | 20 | 7.48E-08  | 0.742 | 0.936 | v7.1          | KKI |
| ICV                             | ICC3 | 0.997 | 657.47   | 20 | 20 | 5.95E-24  | 0.994 | 0.999 | v5.3          | KKI |
| ICV                             | ICC2 | 1.000 | 4.03E+11 | 20 | 20 | 8.09E-112 | 1.000 | 1.000 | v5.3 vs. v6.0 | KKI |
| ICV                             | ICC2 | 0.985 | 149.16   | 20 | 20 | 1.50E-17  | 0.968 | 0.993 | v5.3 vs. v7.1 | KKI |

|                                     |      |       |        |    |    |          |        |       |               |     |
|-------------------------------------|------|-------|--------|----|----|----------|--------|-------|---------------|-----|
| ICV                                 | ICC3 | 0.997 | 657.45 | 20 | 20 | 5.96E-24 | 0.994  | 0.999 | v6.0          | KKI |
| ICV                                 | ICC2 | 0.985 | 149.16 | 20 | 20 | 1.50E-17 | 0.968  | 0.993 | v6.0 vs. v7.1 | KKI |
| ICV                                 | ICC3 | 0.994 | 322.54 | 20 | 20 | 7.17E-21 | 0.987  | 0.997 | v7.1          | KKI |
| LH_Accumbens                        | ICC3 | 0.524 | 3.20   | 20 | 20 | 6.13E-03 | 0.203  | 0.744 | v5.3          | KKI |
| LH_Accumbens                        | ICC2 | 0.395 | 5.70   | 20 | 20 | 1.37E-04 | -0.069 | 0.706 | v5.3 vs. v6.0 | KKI |
| LH_Accumbens                        | ICC2 | 0.645 | 8.53   | 20 | 20 | 6.06E-06 | 0.114  | 0.849 | v5.3 vs. v7.1 | KKI |
| LH_Accumbens                        | ICC3 | 0.867 | 14.08  | 20 | 20 | 8.68E-08 | 0.738  | 0.935 | v6.0          | KKI |
| LH_Accumbens                        | ICC2 | 0.657 | 9.68   | 20 | 20 | 2.15E-06 | 0.088  | 0.859 | v6.0 vs. v7.1 | KKI |
| LH_Accumbens                        | ICC3 | 0.675 | 5.15   | 20 | 20 | 2.85E-04 | 0.416  | 0.833 | v7.1          | KKI |
| LH_Amygdala                         | ICC3 | 0.886 | 16.53  | 20 | 20 | 2.08E-08 | 0.772  | 0.945 | v5.3          | KKI |
| LH_Amygdala                         | ICC2 | 0.810 | 13.18  | 20 | 20 | 1.55E-07 | 0.538  | 0.915 | v5.3 vs. v6.0 | KKI |
| LH_Amygdala                         | ICC2 | 0.808 | 9.01   | 20 | 20 | 3.91E-06 | 0.630  | 0.905 | v5.3 vs. v7.1 | KKI |
| LH_Amygdala                         | ICC3 | 0.906 | 20.33  | 20 | 20 | 3.20E-09 | 0.811  | 0.955 | v6.0          | KKI |
| LH_Amygdala                         | ICC2 | 0.830 | 15.92  | 20 | 20 | 2.92E-08 | 0.536  | 0.928 | v6.0 vs. v7.1 | KKI |
| LH_Amygdala                         | ICC3 | 0.903 | 19.65  | 20 | 20 | 4.38E-09 | 0.805  | 0.953 | v7.1          | KKI |
| LH_bankssts_surfavg                 | ICC3 | 0.985 | 135.35 | 20 | 20 | 3.92E-17 | 0.969  | 0.993 | v5.3          | KKI |
| LH_bankssts_surfavg                 | ICC2 | 0.701 | 6.79   | 20 | 20 | 3.70E-05 | 0.430  | 0.851 | v5.3 vs. v6.0 | KKI |
| LH_bankssts_surfavg                 | ICC2 | 0.694 | 6.98   | 20 | 20 | 2.98E-05 | 0.393  | 0.850 | v5.3 vs. v7.1 | KKI |
| LH_bankssts_surfavg                 | ICC3 | 0.978 | 90.54  | 20 | 20 | 2.04E-15 | 0.954  | 0.990 | v6.0          | KKI |
| LH_bankssts_surfavg                 | ICC2 | 0.968 | 62.18  | 20 | 20 | 8.00E-14 | 0.934  | 0.985 | v6.0 vs. v7.1 | KKI |
| LH_bankssts_surfavg                 | ICC3 | 0.970 | 66.29  | 20 | 20 | 4.29E-14 | 0.938  | 0.986 | v7.1          | KKI |
| LH_bankssts_thickavg                | ICC3 | 0.883 | 16.09  | 20 | 20 | 2.66E-08 | 0.767  | 0.943 | v5.3          | KKI |
| LH_bankssts_thickavg                | ICC2 | 0.935 | 36.73  | 20 | 20 | 1.27E-11 | 0.845  | 0.971 | v5.3 vs. v6.0 | KKI |
| LH_bankssts_thickavg                | ICC2 | 0.929 | 26.26  | 20 | 20 | 3.01E-10 | 0.856  | 0.966 | v5.3 vs. v7.1 | KKI |
| LH_bankssts_thickavg                | ICC3 | 0.921 | 24.42  | 20 | 20 | 5.90E-10 | 0.840  | 0.962 | v6.0          | KKI |
| LH_bankssts_thickavg                | ICC2 | 0.939 | 49.31  | 20 | 20 | 7.55E-13 | 0.790  | 0.976 | v6.0 vs. v7.1 | KKI |
| LH_bankssts_thickavg                | ICC3 | 0.936 | 30.43  | 20 | 20 | 7.55E-11 | 0.869  | 0.970 | v7.1          | KKI |
| LH_caudalanteriorcingulate_surfavg  | ICC3 | 0.951 | 39.79  | 20 | 20 | 5.91E-12 | 0.899  | 0.977 | v5.3          | KKI |
| LH_caudalanteriorcingulate_surfavg  | ICC2 | 0.861 | 16.69  | 20 | 20 | 1.92E-08 | 0.687  | 0.936 | v5.3 vs. v6.0 | KKI |
| LH_caudalanteriorcingulate_surfavg  | ICC2 | 0.846 | 11.55  | 20 | 20 | 4.84E-07 | 0.699  | 0.925 | v5.3 vs. v7.1 | KKI |
| LH_caudalanteriorcingulate_surfavg  | ICC3 | 0.946 | 36.28  | 20 | 20 | 1.43E-11 | 0.889  | 0.974 | v6.0          | KKI |
| LH_caudalanteriorcingulate_surfavg  | ICC2 | 0.908 | 44.48  | 20 | 20 | 2.04E-12 | 0.511  | 0.968 | v6.0 vs. v7.1 | KKI |
| LH_caudalanteriorcingulate_surfavg  | ICC3 | 0.924 | 25.30  | 20 | 20 | 4.25E-10 | 0.845  | 0.963 | v7.1          | KKI |
| LH_caudalanteriorcingulate_thickavg | ICC3 | 0.862 | 13.53  | 20 | 20 | 1.23E-07 | 0.729  | 0.933 | v5.3          | KKI |
| LH_caudalanteriorcingulate_thickavg | ICC2 | 0.886 | 17.51  | 20 | 20 | 1.25E-08 | 0.774  | 0.945 | v5.3 vs. v6.0 | KKI |
| LH_caudalanteriorcingulate_thickavg | ICC2 | 0.457 | 10.96  | 20 | 20 | 7.57E-07 | -0.056 | 0.768 | v5.3 vs. v7.1 | KKI |
| LH_caudalanteriorcingulate_thickavg | ICC3 | 0.907 | 20.54  | 20 | 20 | 2.92E-09 | 0.813  | 0.955 | v6.0          | KKI |
| LH_caudalanteriorcingulate_thickavg | ICC2 | 0.523 | 9.14   | 20 | 20 | 3.46E-06 | -0.054 | 0.801 | v6.0 vs. v7.1 | KKI |
| LH_caudalanteriorcingulate_thickavg | ICC3 | 0.916 | 22.95  | 20 | 20 | 1.05E-09 | 0.831  | 0.960 | v7.1          | KKI |
| LH_caudalmiddlefrontal_surfavg      | ICC3 | 0.850 | 12.34  | 20 | 20 | 2.74E-07 | 0.706  | 0.927 | v5.3          | KKI |
| LH_caudalmiddlefrontal_surfavg      | ICC2 | 0.804 | 10.58  | 20 | 20 | 1.02E-06 | 0.609  | 0.904 | v5.3 vs. v6.0 | KKI |
| LH_caudalmiddlefrontal_surfavg      | ICC2 | 0.913 | 23.26  | 20 | 20 | 9.29E-10 | 0.823  | 0.958 | v5.3 vs. v7.1 | KKI |
| LH_caudalmiddlefrontal_surfavg      | ICC3 | 0.839 | 11.39  | 20 | 20 | 5.47E-07 | 0.686  | 0.921 | v6.0          | KKI |
| LH_caudalmiddlefrontal_surfavg      | ICC2 | 0.814 | 9.93   | 20 | 20 | 1.74E-06 | 0.646  | 0.907 | v6.0 vs. v7.1 | KKI |



|                                 |      |       |        |    |    |          |        |       |               |     |
|---------------------------------|------|-------|--------|----|----|----------|--------|-------|---------------|-----|
| LH_caudalmiddlefrontal_surfavg  | ICC3 | 0.818 | 10.00  | 20 | 20 | 1.64E-06 | 0.650  | 0.910 | v7.1          | KKI |
| LH_caudalmiddlefrontal_thickavg | ICC3 | 0.659 | 4.86   | 20 | 20 | 4.29E-04 | 0.392  | 0.823 | v5.3          | KKI |
| LH_caudalmiddlefrontal_thickavg | ICC2 | 0.637 | 5.23   | 20 | 20 | 2.55E-04 | 0.349  | 0.813 | v5.3 vs. v6.0 | KKI |
| LH_caudalmiddlefrontal_thickavg | ICC2 | 0.879 | 20.63  | 20 | 20 | 2.80E-09 | 0.696  | 0.946 | v5.3 vs. v7.1 | KKI |
| LH_caudalmiddlefrontal_thickavg | ICC3 | 0.644 | 4.61   | 20 | 20 | 6.15E-04 | 0.369  | 0.815 | v6.0          | KKI |
| LH_caudalmiddlefrontal_thickavg | ICC2 | 0.814 | 9.62   | 20 | 20 | 2.27E-06 | 0.645  | 0.907 | v6.0 vs. v7.1 | KKI |
| LH_caudalmiddlefrontal_thickavg | ICC3 | 0.688 | 5.40   | 20 | 20 | 2.03E-04 | 0.436  | 0.840 | v7.1          | KKI |
| LH_Caudate                      | ICC3 | 0.981 | 104.63 | 20 | 20 | 4.94E-16 | 0.960  | 0.991 | v5.3          | KKI |
| LH_Caudate                      | ICC2 | 0.887 | 179.87 | 20 | 20 | 2.36E-18 | 0.032  | 0.970 | v5.3 vs. v6.0 | KKI |
| LH_Caudate                      | ICC2 | 0.935 | 176.21 | 20 | 20 | 2.89E-18 | 0.157  | 0.983 | v5.3 vs. v7.1 | KKI |
| LH_Caudate                      | ICC3 | 0.995 | 371.77 | 20 | 20 | 1.74E-21 | 0.989  | 0.997 | v6.0          | KKI |
| LH_Caudate                      | ICC2 | 0.983 | 276.77 | 20 | 20 | 3.28E-20 | 0.859  | 0.995 | v6.0 vs. v7.1 | KKI |
| LH_Caudate                      | ICC3 | 0.990 | 205.99 | 20 | 20 | 6.15E-19 | 0.980  | 0.995 | v7.1          | KKI |
| LH_cuneus_surfavg               | ICC3 | 0.957 | 45.94  | 20 | 20 | 1.49E-12 | 0.912  | 0.980 | v5.3          | KKI |
| LH_cuneus_surfavg               | ICC2 | 0.913 | 31.04  | 20 | 20 | 6.25E-11 | 0.756  | 0.963 | v5.3 vs. v6.0 | KKI |
| LH_cuneus_surfavg               | ICC2 | 0.914 | 32.66  | 20 | 20 | 3.87E-11 | 0.736  | 0.965 | v5.3 vs. v7.1 | KKI |
| LH_cuneus_surfavg               | ICC3 | 0.981 | 103.11 | 20 | 20 | 5.71E-16 | 0.960  | 0.991 | v6.0          | KKI |
| LH_cuneus_surfavg               | ICC2 | 0.986 | 136.16 | 20 | 20 | 3.69E-17 | 0.971  | 0.993 | v6.0 vs. v7.1 | KKI |
| LH_cuneus_surfavg               | ICC3 | 0.978 | 90.43  | 20 | 20 | 2.07E-15 | 0.954  | 0.990 | v7.1          | KKI |
| LH_cuneus_thickavg              | ICC3 | 0.964 | 53.97  | 20 | 20 | 3.15E-13 | 0.924  | 0.983 | v5.3          | KKI |
| LH_cuneus_thickavg              | ICC2 | 0.817 | 51.37  | 20 | 20 | 5.09E-13 | 0.014  | 0.945 | v5.3 vs. v6.0 | KKI |
| LH_cuneus_thickavg              | ICC2 | 0.829 | 18.74  | 20 | 20 | 6.73E-09 | 0.424  | 0.933 | v5.3 vs. v7.1 | KKI |
| LH_cuneus_thickavg              | ICC3 | 0.953 | 41.59  | 20 | 20 | 3.87E-12 | 0.903  | 0.978 | v6.0          | KKI |
| LH_cuneus_thickavg              | ICC2 | 0.935 | 42.94  | 20 | 20 | 2.85E-12 | 0.799  | 0.973 | v6.0 vs. v7.1 | KKI |
| LH_cuneus_thickavg              | ICC3 | 0.955 | 43.11  | 20 | 20 | 2.75E-12 | 0.906  | 0.978 | v7.1          | KKI |
| LH_entorhinal_surfavg           | ICC3 | 0.845 | 11.86  | 20 | 20 | 3.86E-07 | 0.696  | 0.924 | v5.3          | KKI |
| LH_entorhinal_surfavg           | ICC2 | 0.447 | 4.49   | 20 | 20 | 7.35E-04 | -0.009 | 0.722 | v5.3 vs. v6.0 | KKI |
| LH_entorhinal_surfavg           | ICC2 | 0.425 | 3.02   | 20 | 20 | 8.64E-03 | 0.085  | 0.677 | v5.3 vs. v7.1 | KKI |
| LH_entorhinal_surfavg           | ICC3 | 0.944 | 34.98  | 20 | 20 | 2.02E-11 | 0.886  | 0.973 | v6.0          | KKI |
| LH_entorhinal_surfavg           | ICC2 | 0.909 | 28.36  | 20 | 20 | 1.46E-10 | 0.760  | 0.961 | v6.0 vs. v7.1 | KKI |
| LH_entorhinal_surfavg           | ICC3 | 0.949 | 38.45  | 20 | 20 | 8.21E-12 | 0.895  | 0.976 | v7.1          | KKI |
| LH_entorhinal_thickavg          | ICC3 | 0.803 | 9.13   | 20 | 20 | 3.49E-06 | 0.623  | 0.902 | v5.3          | KKI |
| LH_entorhinal_thickavg          | ICC2 | 0.860 | 13.10  | 20 | 20 | 1.63E-07 | 0.727  | 0.931 | v5.3 vs. v6.0 | KKI |
| LH_entorhinal_thickavg          | ICC2 | 0.540 | 7.97   | 20 | 20 | 1.05E-05 | -0.034 | 0.803 | v5.3 vs. v7.1 | KKI |
| LH_entorhinal_thickavg          | ICC3 | 0.766 | 7.54   | 20 | 20 | 1.64E-05 | 0.560  | 0.882 | v6.0          | KKI |
| LH_entorhinal_thickavg          | ICC2 | 0.624 | 22.02  | 20 | 20 | 1.54E-09 | -0.040 | 0.867 | v6.0 vs. v7.1 | KKI |
| LH_entorhinal_thickavg          | ICC3 | 0.845 | 11.91  | 20 | 20 | 3.72E-07 | 0.697  | 0.924 | v7.1          | KKI |
| LH_frontalpole_surfavg          | ICC3 | 0.844 | 11.85  | 20 | 20 | 3.88E-07 | 0.696  | 0.924 | v5.3          | KKI |
| LH_frontalpole_surfavg          | ICC2 | 0.150 | 2.81   | 20 | 20 | 1.28E-02 | -0.061 | 0.417 | v5.3 vs. v6.0 | KKI |
| LH_frontalpole_surfavg          | ICC2 | 0.122 | 4.12   | 20 | 20 | 1.30E-03 | -0.036 | 0.371 | v5.3 vs. v7.1 | KKI |
| LH_frontalpole_surfavg          | ICC3 | 0.727 | 6.32   | 20 | 20 | 6.41E-05 | 0.497  | 0.861 | v6.0          | KKI |
| LH_frontalpole_surfavg          | ICC2 | 0.496 | 6.06   | 20 | 20 | 8.74E-05 | -0.026 | 0.768 | v6.0 vs. v7.1 | KKI |
| LH_frontalpole_surfavg          | ICC3 | 0.771 | 7.75   | 20 | 20 | 1.31E-05 | 0.570  | 0.886 | v7.1          | KKI |
| LH_frontalpole_thickavg         | ICC3 | 0.863 | 13.65  | 20 | 20 | 1.14E-07 | 0.731  | 0.933 | v5.3          | KKI |

|                              |      |       |        |    |    |          |       |       |               |     |
|------------------------------|------|-------|--------|----|----|----------|-------|-------|---------------|-----|
| LH_frontalpole_thickavg      | ICC2 | 0.767 | 8.21   | 20 | 20 | 8.26E-06 | 0.562 | 0.883 | v5.3 vs. v6.0 | KKI |
| LH_frontalpole_thickavg      | ICC2 | 0.809 | 9.27   | 20 | 20 | 3.07E-06 | 0.635 | 0.905 | v5.3 vs. v7.1 | KKI |
| LH_frontalpole_thickavg      | ICC3 | 0.857 | 12.96  | 20 | 20 | 1.80E-07 | 0.718 | 0.930 | v6.0          | KKI |
| LH_frontalpole_thickavg      | ICC2 | 0.858 | 13.68  | 20 | 20 | 1.12E-07 | 0.722 | 0.930 | v6.0 vs. v7.1 | KKI |
| LH_frontalpole_thickavg      | ICC3 | 0.812 | 9.66   | 20 | 20 | 2.19E-06 | 0.640 | 0.907 | v7.1          | KKI |
| LH_fusiform_surfvag          | ICC3 | 0.968 | 61.82  | 20 | 20 | 8.47E-14 | 0.934 | 0.985 | v5.3          | KKI |
| LH_fusiform_surfvag          | ICC2 | 0.849 | 21.81  | 20 | 20 | 1.68E-09 | 0.464 | 0.942 | v5.3 vs. v6.0 | KKI |
| LH_fusiform_surfvag          | ICC2 | 0.901 | 26.78  | 20 | 20 | 2.50E-10 | 0.727 | 0.958 | v5.3 vs. v7.1 | KKI |
| LH_fusiform_surfvag          | ICC3 | 0.983 | 119.32 | 20 | 20 | 1.36E-16 | 0.965 | 0.992 | v6.0          | KKI |
| LH_fusiform_surfvag          | ICC2 | 0.979 | 154.69 | 20 | 20 | 1.05E-17 | 0.913 | 0.992 | v6.0 vs. v7.1 | KKI |
| LH_fusiform_surfvag          | ICC3 | 0.993 | 274.45 | 20 | 20 | 3.57E-20 | 0.985 | 0.997 | v7.1          | KKI |
| LH_fusiform_thickavg         | ICC3 | 0.922 | 24.60  | 20 | 20 | 5.51E-10 | 0.841 | 0.962 | v5.3          | KKI |
| LH_fusiform_thickavg         | ICC2 | 0.928 | 25.49  | 20 | 20 | 3.97E-10 | 0.852 | 0.965 | v5.3 vs. v6.0 | KKI |
| LH_fusiform_thickavg         | ICC2 | 0.747 | 15.37  | 20 | 20 | 4.00E-08 | 0.138 | 0.906 | v5.3 vs. v7.1 | KKI |
| LH_fusiform_thickavg         | ICC3 | 0.897 | 18.40  | 20 | 20 | 7.96E-09 | 0.793 | 0.950 | v6.0          | KKI |
| LH_fusiform_thickavg         | ICC2 | 0.805 | 55.97  | 20 | 20 | 2.22E-13 | 0.001 | 0.942 | v6.0 vs. v7.1 | KKI |
| LH_fusiform_thickavg         | ICC3 | 0.871 | 14.51  | 20 | 20 | 6.68E-08 | 0.745 | 0.937 | v7.1          | KKI |
| LH_Hippocampus               | ICC3 | 0.930 | 27.38  | 20 | 20 | 2.03E-10 | 0.856 | 0.966 | v5.3          | KKI |
| LH_Hippocampus               | ICC2 | 0.860 | 26.34  | 20 | 20 | 2.93E-10 | 0.418 | 0.949 | v5.3 vs. v6.0 | KKI |
| LH_Hippocampus               | ICC2 | 0.900 | 22.42  | 20 | 20 | 1.30E-09 | 0.781 | 0.953 | v5.3 vs. v7.1 | KKI |
| LH_Hippocampus               | ICC3 | 0.951 | 39.63  | 20 | 20 | 6.14E-12 | 0.898 | 0.977 | v6.0          | KKI |
| LH_Hippocampus               | ICC2 | 0.950 | 68.94  | 20 | 20 | 2.93E-14 | 0.777 | 0.982 | v6.0 vs. v7.1 | KKI |
| LH_Hippocampus               | ICC3 | 0.937 | 30.66  | 20 | 20 | 7.02E-11 | 0.870 | 0.970 | v7.1          | KKI |
| LH_inferiorparietal_surfvag  | ICC3 | 0.983 | 119.91 | 20 | 20 | 1.29E-16 | 0.965 | 0.992 | v5.3          | KKI |
| LH_inferiorparietal_surfvag  | ICC2 | 0.889 | 35.44  | 20 | 20 | 1.78E-11 | 0.460 | 0.961 | v5.3 vs. v6.0 | KKI |
| LH_inferiorparietal_surfvag  | ICC2 | 0.883 | 30.97  | 20 | 20 | 6.38E-11 | 0.502 | 0.957 | v5.3 vs. v7.1 | KKI |
| LH_inferiorparietal_surfvag  | ICC3 | 0.995 | 434.23 | 20 | 20 | 3.72E-22 | 0.990 | 0.998 | v6.0          | KKI |
| LH_inferiorparietal_surfvag  | ICC2 | 0.995 | 352.74 | 20 | 20 | 2.94E-21 | 0.989 | 0.997 | v6.0 vs. v7.1 | KKI |
| LH_inferiorparietal_surfvag  | ICC3 | 0.993 | 296.66 | 20 | 20 | 1.65E-20 | 0.986 | 0.997 | v7.1          | KKI |
| LH_inferiorparietal_thickavg | ICC3 | 0.768 | 7.64   | 20 | 20 | 1.48E-05 | 0.565 | 0.884 | v5.3          | KKI |
| LH_inferiorparietal_thickavg | ICC2 | 0.813 | 13.29  | 20 | 20 | 1.44E-07 | 0.549 | 0.917 | v5.3 vs. v6.0 | KKI |
| LH_inferiorparietal_thickavg | ICC2 | 0.805 | 9.13   | 20 | 20 | 3.48E-06 | 0.630 | 0.903 | v5.3 vs. v7.1 | KKI |
| LH_inferiorparietal_thickavg | ICC3 | 0.825 | 10.44  | 20 | 20 | 1.14E-06 | 0.662 | 0.914 | v6.0          | KKI |
| LH_inferiorparietal_thickavg | ICC2 | 0.896 | 25.21  | 20 | 20 | 4.40E-10 | 0.720 | 0.955 | v6.0 vs. v7.1 | KKI |
| LH_inferiorparietal_thickavg | ICC3 | 0.872 | 14.66  | 20 | 20 | 6.08E-08 | 0.747 | 0.938 | v7.1          | KKI |
| LH_inferiortemporal_surfvag  | ICC3 | 0.984 | 126.97 | 20 | 20 | 7.35E-17 | 0.967 | 0.993 | v5.3          | KKI |
| LH_inferiortemporal_surfvag  | ICC2 | 0.942 | 44.45  | 20 | 20 | 2.05E-12 | 0.845 | 0.975 | v5.3 vs. v6.0 | KKI |
| LH_inferiortemporal_surfvag  | ICC2 | 0.914 | 36.44  | 20 | 20 | 1.37E-11 | 0.686 | 0.967 | v5.3 vs. v7.1 | KKI |
| LH_inferiortemporal_surfvag  | ICC3 | 0.986 | 142.95 | 20 | 20 | 2.28E-17 | 0.971 | 0.993 | v6.0          | KKI |
| LH_inferiortemporal_surfvag  | ICC2 | 0.986 | 217.13 | 20 | 20 | 3.65E-19 | 0.953 | 0.995 | v6.0 vs. v7.1 | KKI |
| LH_inferiortemporal_surfvag  | ICC3 | 0.980 | 99.70  | 20 | 20 | 7.94E-16 | 0.958 | 0.991 | v7.1          | KKI |
| LH_inferiortemporal_thickavg | ICC3 | 0.902 | 19.44  | 20 | 20 | 4.81E-09 | 0.803 | 0.953 | v5.3          | KKI |
| LH_inferiortemporal_thickavg | ICC2 | 0.923 | 29.32  | 20 | 20 | 1.07E-10 | 0.828 | 0.964 | v5.3 vs. v6.0 | KKI |
| LH_inferiortemporal_thickavg | ICC2 | 0.876 | 26.75  | 20 | 20 | 2.53E-10 | 0.535 | 0.953 | v5.3 vs. v7.1 | KKI |

|                                 |      |       |        |    |    |          |        |       |               |     |
|---------------------------------|------|-------|--------|----|----|----------|--------|-------|---------------|-----|
| LH_inferiortemporal_thickavg    | ICC3 | 0.836 | 11.16  | 20 | 20 | 6.49E-07 | 0.680  | 0.919 | v6.0          | KKI |
| LH_inferiortemporal_thickavg    | ICC2 | 0.934 | 38.68  | 20 | 20 | 7.74E-12 | 0.830  | 0.971 | v6.0 vs. v7.1 | KKI |
| LH_inferiortemporal_thickavg    | ICC3 | 0.890 | 17.24  | 20 | 20 | 1.43E-08 | 0.781  | 0.947 | v7.1          | KKI |
| LH_insula_surfvag               | ICC3 | 0.724 | 6.24   | 20 | 20 | 6.99E-05 | 0.492  | 0.860 | v5.3          | KKI |
| LH_insula_surfvag               | ICC2 | 0.386 | 6.59   | 20 | 20 | 4.63E-05 | -0.068 | 0.706 | v5.3 vs. v6.0 | KKI |
| LH_insula_surfvag               | ICC2 | 0.370 | 7.39   | 20 | 20 | 1.92E-05 | -0.063 | 0.697 | v5.3 vs. v7.1 | KKI |
| LH_insula_surfvag               | ICC3 | 0.815 | 9.79   | 20 | 20 | 1.97E-06 | 0.643  | 0.908 | v6.0          | KKI |
| LH_insula_surfvag               | ICC2 | 0.759 | 7.05   | 20 | 20 | 2.75E-05 | 0.548  | 0.879 | v6.0 vs. v7.1 | KKI |
| LH_insula_surfvag               | ICC3 | 0.800 | 8.98   | 20 | 20 | 3.99E-06 | 0.618  | 0.900 | v7.1          | KKI |
| LH_insula_thickavg              | ICC3 | 0.799 | 8.94   | 20 | 20 | 4.14E-06 | 0.616  | 0.900 | v5.3          | KKI |
| LH_insula_thickavg              | ICC2 | 0.717 | 7.15   | 20 | 20 | 2.47E-05 | 0.458  | 0.859 | v5.3 vs. v6.0 | KKI |
| LH_insula_thickavg              | ICC2 | 0.634 | 7.87   | 20 | 20 | 1.16E-05 | 0.124  | 0.840 | v5.3 vs. v7.1 | KKI |
| LH_insula_thickavg              | ICC3 | 0.687 | 5.39   | 20 | 20 | 2.06E-04 | 0.435  | 0.839 | v6.0          | KKI |
| LH_insula_thickavg              | ICC2 | 0.713 | 6.37   | 20 | 20 | 6.00E-05 | 0.480  | 0.853 | v6.0 vs. v7.1 | KKI |
| LH_insula_thickavg              | ICC3 | 0.764 | 7.47   | 20 | 20 | 1.76E-05 | 0.557  | 0.881 | v7.1          | KKI |
| LH_isthmuscingulate_surfvag     | ICC3 | 0.845 | 11.91  | 20 | 20 | 3.73E-07 | 0.697  | 0.924 | v5.3          | KKI |
| LH_isthmuscingulate_surfvag     | ICC2 | 0.671 | 4.92   | 20 | 20 | 3.96E-04 | 0.408  | 0.831 | v5.3 vs. v6.0 | KKI |
| LH_isthmuscingulate_surfvag     | ICC2 | 0.681 | 5.23   | 20 | 20 | 2.56E-04 | 0.429  | 0.835 | v5.3 vs. v7.1 | KKI |
| LH_isthmuscingulate_surfvag     | ICC3 | 0.973 | 72.10  | 20 | 20 | 1.89E-14 | 0.943  | 0.987 | v6.0          | KKI |
| LH_isthmuscingulate_surfvag     | ICC2 | 0.980 | 117.66 | 20 | 20 | 1.56E-16 | 0.954  | 0.991 | v6.0 vs. v7.1 | KKI |
| LH_isthmuscingulate_surfvag     | ICC3 | 0.970 | 64.92  | 20 | 20 | 5.26E-14 | 0.937  | 0.986 | v7.1          | KKI |
| LH_isthmuscingulate_thickavg    | ICC3 | 0.774 | 7.85   | 20 | 20 | 1.19E-05 | 0.574  | 0.887 | v5.3          | KKI |
| LH_isthmuscingulate_thickavg    | ICC2 | 0.436 | 3.59   | 20 | 20 | 3.13E-03 | 0.048  | 0.698 | v5.3 vs. v6.0 | KKI |
| LH_isthmuscingulate_thickavg    | ICC2 | 0.312 | 2.79   | 20 | 20 | 1.32E-02 | -0.039 | 0.600 | v5.3 vs. v7.1 | KKI |
| LH_isthmuscingulate_thickavg    | ICC3 | 0.794 | 8.71   | 20 | 20 | 5.12E-06 | 0.608  | 0.897 | v6.0          | KKI |
| LH_isthmuscingulate_thickavg    | ICC2 | 0.761 | 9.02   | 20 | 20 | 3.84E-06 | 0.514  | 0.885 | v6.0 vs. v7.1 | KKI |
| LH_isthmuscingulate_thickavg    | ICC3 | 0.797 | 8.83   | 20 | 20 | 4.58E-06 | 0.612  | 0.899 | v7.1          | KKI |
| LH_lateraloccipital_surfvag     | ICC3 | 0.989 | 176.52 | 20 | 20 | 2.84E-18 | 0.976  | 0.995 | v5.3          | KKI |
| LH_lateraloccipital_surfvag     | ICC2 | 0.849 | 23.61  | 20 | 20 | 8.07E-10 | 0.406  | 0.944 | v5.3 vs. v6.0 | KKI |
| LH_lateraloccipital_surfvag     | ICC2 | 0.805 | 19.56  | 20 | 20 | 4.56E-09 | 0.257  | 0.929 | v5.3 vs. v7.1 | KKI |
| LH_lateraloccipital_surfvag     | ICC3 | 0.992 | 257.35 | 20 | 20 | 6.76E-20 | 0.984  | 0.996 | v6.0          | KKI |
| LH_lateraloccipital_surfvag     | ICC2 | 0.991 | 342.86 | 20 | 20 | 3.90E-21 | 0.965  | 0.997 | v6.0 vs. v7.1 | KKI |
| LH_lateraloccipital_surfvag     | ICC3 | 0.990 | 197.10 | 20 | 20 | 9.52E-19 | 0.979  | 0.995 | v7.1          | KKI |
| LH_lateraloccipital_thickavg    | ICC3 | 0.935 | 29.98  | 20 | 20 | 8.67E-11 | 0.868  | 0.969 | v5.3          | KKI |
| LH_lateraloccipital_thickavg    | ICC2 | 0.832 | 35.68  | 20 | 20 | 1.67E-11 | 0.101  | 0.947 | v5.3 vs. v6.0 | KKI |
| LH_lateraloccipital_thickavg    | ICC2 | 0.896 | 30.51  | 20 | 20 | 7.35E-11 | 0.628  | 0.960 | v5.3 vs. v7.1 | KKI |
| LH_lateraloccipital_thickavg    | ICC3 | 0.874 | 14.90  | 20 | 20 | 5.28E-08 | 0.750  | 0.939 | v6.0          | KKI |
| LH_lateraloccipital_thickavg    | ICC2 | 0.951 | 93.78  | 20 | 20 | 1.45E-15 | 0.644  | 0.984 | v6.0 vs. v7.1 | KKI |
| LH_lateraloccipital_thickavg    | ICC3 | 0.908 | 20.73  | 20 | 20 | 2.68E-09 | 0.814  | 0.956 | v7.1          | KKI |
| LH_lateralorbitofrontal_surfvag | ICC3 | 0.961 | 49.79  | 20 | 20 | 6.88E-13 | 0.918  | 0.981 | v5.3          | KKI |
| LH_lateralorbitofrontal_surfvag | ICC2 | 0.929 | 59.60  | 20 | 20 | 1.21E-13 | 0.568  | 0.976 | v5.3 vs. v6.0 | KKI |
| LH_lateralorbitofrontal_surfvag | ICC2 | 0.810 | 69.80  | 20 | 20 | 2.60E-14 | -0.001 | 0.945 | v5.3 vs. v7.1 | KKI |
| LH_lateralorbitofrontal_surfvag | ICC3 | 0.970 | 66.55  | 20 | 20 | 4.13E-14 | 0.938  | 0.986 | v6.0          | KKI |
| LH_lateralorbitofrontal_surfvag | ICC2 | 0.922 | 93.11  | 20 | 20 | 1.55E-15 | 0.243  | 0.977 | v6.0 vs. v7.1 | KKI |

|                                  |      |       |          |    |    |          |        |       |               |     |
|----------------------------------|------|-------|----------|----|----|----------|--------|-------|---------------|-----|
| LH_lateralorbitofrontal_surfvag  | ICC3 | 0.978 | 90.90    | 20 | 20 | 1.97E-15 | 0.954  | 0.990 | v7.1          | KKI |
| LH_lateralorbitofrontal_thickavg | ICC3 | 0.951 | 39.84    | 20 | 20 | 5.85E-12 | 0.899  | 0.977 | v5.3          | KKI |
| LH_lateralorbitofrontal_thickavg | ICC2 | 0.908 | 22.58    | 20 | 20 | 1.22E-09 | 0.811  | 0.956 | v5.3 vs. v6.0 | KKI |
| LH_lateralorbitofrontal_thickavg | ICC2 | 0.795 | 18.00    | 20 | 20 | 9.72E-09 | 0.253  | 0.924 | v5.3 vs. v7.1 | KKI |
| LH_lateralorbitofrontal_thickavg | ICC3 | 0.907 | 20.51    | 20 | 20 | 2.96E-09 | 0.812  | 0.955 | v6.0          | KKI |
| LH_lateralorbitofrontal_thickavg | ICC2 | 0.846 | 19.57    | 20 | 20 | 4.54E-09 | 0.510  | 0.938 | v6.0 vs. v7.1 | KKI |
| LH_lateralorbitofrontal_thickavg | ICC3 | 0.944 | 34.72    | 20 | 20 | 2.17E-11 | 0.885  | 0.973 | v7.1          | KKI |
| LH_LateralVentricle              | ICC3 | 0.999 | 2616.87  | 20 | 20 | 6.09E-30 | 0.998  | 1.000 | v5.3          | KKI |
| LH_LateralVentricle              | ICC2 | 0.994 | 2482.70  | 20 | 20 | 1.03E-29 | 0.670  | 0.998 | v5.3 vs. v6.0 | KKI |
| LH_LateralVentricle              | ICC2 | 0.991 | 2339.77  | 20 | 20 | 1.86E-29 | 0.536  | 0.998 | v5.3 vs. v7.1 | KKI |
| LH_LateraVentricle               | ICC3 | 1.000 | 4159.40  | 20 | 20 | 5.93E-32 | 0.999  | 1.000 | v6.0          | KKI |
| LH_LateraVentricle               | ICC2 | 1.000 | 16464.35 | 20 | 20 | 6.30E-38 | 0.997  | 1.000 | v6.0 vs. v7.1 | KKI |
| LH_LateraVentricle               | ICC3 | 1.000 | 4988.49  | 20 | 20 | 9.64E-33 | 0.999  | 1.000 | v7.1          | KKI |
| LH_lingual_surfvag               | ICC3 | 0.965 | 55.69    | 20 | 20 | 2.33E-13 | 0.927  | 0.983 | v5.3          | KKI |
| LH_lingual_surfvag               | ICC2 | 0.910 | 20.56    | 20 | 20 | 2.89E-09 | 0.819  | 0.957 | v5.3 vs. v6.0 | KKI |
| LH_lingual_surfvag               | ICC2 | 0.904 | 20.66    | 20 | 20 | 2.76E-09 | 0.808  | 0.953 | v5.3 vs. v7.1 | KKI |
| LH_lingual_surfvag               | ICC3 | 0.985 | 128.94   | 20 | 20 | 6.32E-17 | 0.968  | 0.993 | v6.0          | KKI |
| LH_lingual_surfvag               | ICC2 | 0.989 | 227.15   | 20 | 20 | 2.33E-19 | 0.970  | 0.995 | v6.0 vs. v7.1 | KKI |
| LH_lingual_surfvag               | ICC3 | 0.989 | 182.75   | 20 | 20 | 2.01E-18 | 0.977  | 0.995 | v7.1          | KKI |
| LH_lingual_thickavg              | ICC3 | 0.948 | 37.54    | 20 | 20 | 1.03E-11 | 0.893  | 0.975 | v5.3          | KKI |
| LH_lingual_thickavg              | ICC2 | 0.893 | 27.29    | 20 | 20 | 2.09E-10 | 0.657  | 0.957 | v5.3 vs. v6.0 | KKI |
| LH_lingual_thickavg              | ICC2 | 0.926 | 24.97    | 20 | 20 | 4.80E-10 | 0.850  | 0.965 | v5.3 vs. v7.1 | KKI |
| LH_lingual_thickavg              | ICC3 | 0.950 | 39.21    | 20 | 20 | 6.81E-12 | 0.897  | 0.976 | v6.0          | KKI |
| LH_lingual_thickavg              | ICC2 | 0.930 | 90.13    | 20 | 20 | 2.14E-15 | 0.342  | 0.979 | v6.0 vs. v7.1 | KKI |
| LH_lingual_thickavg              | ICC3 | 0.952 | 40.80    | 20 | 20 | 4.66E-12 | 0.901  | 0.977 | v7.1          | KKI |
| LH_medialorbitofrontal_surfvag   | ICC3 | 0.786 | 8.32     | 20 | 20 | 7.41E-06 | 0.593  | 0.893 | v5.3          | KKI |
| LH_medialorbitofrontal_surfvag   | ICC2 | 0.539 | 5.82     | 20 | 20 | 1.19E-04 | 0.045  | 0.785 | v5.3 vs. v6.0 | KKI |
| LH_medialorbitofrontal_surfvag   | ICC2 | 0.593 | 13.46    | 20 | 20 | 1.29E-07 | -0.046 | 0.845 | v5.3 vs. v7.1 | KKI |
| LH_medialorbitofrontal_surfvag   | ICC3 | 0.857 | 12.97    | 20 | 20 | 1.78E-07 | 0.719  | 0.930 | v6.0          | KKI |
| LH_medialorbitofrontal_surfvag   | ICC2 | 0.814 | 9.88     | 20 | 20 | 1.81E-06 | 0.646  | 0.907 | v6.0 vs. v7.1 | KKI |
| LH_medialorbitofrontal_surfvag   | ICC3 | 0.870 | 14.35    | 20 | 20 | 7.36E-08 | 0.742  | 0.936 | v7.1          | KKI |
| LH_medialorbitofrontal_thickavg  | ICC3 | 0.797 | 8.85     | 20 | 20 | 4.53E-06 | 0.613  | 0.899 | v5.3          | KKI |
| LH_medialorbitofrontal_thickavg  | ICC2 | 0.873 | 14.06    | 20 | 20 | 8.82E-08 | 0.747  | 0.938 | v5.3 vs. v6.0 | KKI |
| LH_medialorbitofrontal_thickavg  | ICC2 | 0.874 | 30.47    | 20 | 20 | 7.44E-11 | 0.427  | 0.955 | v5.3 vs. v7.1 | KKI |
| LH_medialorbitofrontal_thickavg  | ICC3 | 0.903 | 19.71    | 20 | 20 | 4.25E-09 | 0.805  | 0.953 | v6.0          | KKI |
| LH_medialorbitofrontal_thickavg  | ICC2 | 0.815 | 15.13    | 20 | 20 | 4.60E-08 | 0.478  | 0.922 | v6.0 vs. v7.1 | KKI |
| LH_medialorbitofrontal_thickavg  | ICC3 | 0.889 | 17.04    | 20 | 20 | 1.59E-08 | 0.778  | 0.946 | v7.1          | KKI |
| LH_middletemporal_surfvag        | ICC3 | 0.985 | 129.97   | 20 | 20 | 5.84E-17 | 0.968  | 0.993 | v5.3          | KKI |
| LH_middletemporal_surfvag        | ICC2 | 0.965 | 68.28    | 20 | 20 | 3.22E-14 | 0.917  | 0.984 | v5.3 vs. v6.0 | KKI |
| LH_middletemporal_surfvag        | ICC2 | 0.921 | 47.19    | 20 | 20 | 1.15E-12 | 0.618  | 0.972 | v5.3 vs. v7.1 | KKI |
| LH_middletemporal_surfvag        | ICC3 | 0.987 | 148.00   | 20 | 20 | 1.62E-17 | 0.972  | 0.994 | v6.0          | KKI |
| LH_middletemporal_surfvag        | ICC2 | 0.977 | 239.65   | 20 | 20 | 1.37E-19 | 0.733  | 0.993 | v6.0 vs. v7.1 | KKI |
| LH_middletemporal_surfvag        | ICC3 | 0.993 | 279.90   | 20 | 20 | 2.93E-20 | 0.985  | 0.997 | v7.1          | KKI |
| LH_middletemporal_thickavg       | ICC3 | 0.842 | 11.62    | 20 | 20 | 4.61E-07 | 0.691  | 0.922 | v5.3          | KKI |

|                             |      |       |       |    |    |          |        |       |               |     |
|-----------------------------|------|-------|-------|----|----|----------|--------|-------|---------------|-----|
| LH_middletemporal_thickavg  | ICC2 | 0.854 | 13.65 | 20 | 20 | 1.14E-07 | 0.712  | 0.928 | v5.3 vs. v6.0 | KKI |
| LH_middletemporal_thickavg  | ICC2 | 0.748 | 13.08 | 20 | 20 | 1.65E-07 | 0.227  | 0.900 | v5.3 vs. v7.1 | KKI |
| LH_middletemporal_thickavg  | ICC3 | 0.870 | 14.40 | 20 | 20 | 7.12E-08 | 0.743  | 0.937 | v6.0          | KKI |
| LH_middletemporal_thickavg  | ICC2 | 0.877 | 38.28 | 20 | 20 | 8.55E-12 | 0.307  | 0.959 | v6.0 vs. v7.1 | KKI |
| LH_middletemporal_thickavg  | ICC3 | 0.874 | 14.92 | 20 | 20 | 5.22E-08 | 0.751  | 0.939 | v7.1          | KKI |
| LH_Pallidum                 | ICC3 | 0.792 | 8.61  | 20 | 20 | 5.66E-06 | 0.604  | 0.896 | v5.3          | KKI |
| LH_Pallidum                 | ICC2 | 0.192 | 2.98  | 20 | 20 | 9.17E-03 | -0.070 | 0.481 | v5.3 vs. v6.0 | KKI |
| LH_Pallidum                 | ICC2 | 0.240 | 3.75  | 20 | 20 | 2.36E-03 | -0.071 | 0.551 | v5.3 vs. v7.1 | KKI |
| LH_Pallidum                 | ICC3 | 0.940 | 32.16 | 20 | 20 | 4.48E-11 | 0.876  | 0.971 | v6.0          | KKI |
| LH_Pallidum                 | ICC2 | 0.893 | 16.96 | 20 | 20 | 1.66E-08 | 0.785  | 0.948 | v6.0 vs. v7.1 | KKI |
| LH_Pallidum                 | ICC3 | 0.943 | 34.12 | 20 | 20 | 2.56E-11 | 0.883  | 0.973 | v7.1          | KKI |
| LH_paracentral_surfavg      | ICC3 | 0.623 | 4.30  | 20 | 20 | 9.84E-04 | 0.339  | 0.803 | v5.3          | KKI |
| LH_paracentral_surfavg      | ICC2 | 0.671 | 4.95  | 20 | 20 | 3.80E-04 | 0.410  | 0.831 | v5.3 vs. v6.0 | KKI |
| LH_paracentral_surfavg      | ICC2 | 0.634 | 4.61  | 20 | 20 | 6.21E-04 | 0.364  | 0.807 | v5.3 vs. v7.1 | KKI |
| LH_paracentral_surfavg      | ICC3 | 0.913 | 22.07 | 20 | 20 | 1.51E-09 | 0.824  | 0.958 | v6.0          | KKI |
| LH_paracentral_surfavg      | ICC2 | 0.885 | 18.34 | 20 | 20 | 8.18E-09 | 0.764  | 0.945 | v6.0 vs. v7.1 | KKI |
| LH_paracentral_surfavg      | ICC3 | 0.942 | 33.28 | 20 | 20 | 3.23E-11 | 0.880  | 0.972 | v7.1          | KKI |
| LH_paracentral_thickavg     | ICC3 | 0.882 | 15.98 | 20 | 20 | 2.82E-08 | 0.765  | 0.943 | v5.3          | KKI |
| LH_paracentral_thickavg     | ICC2 | 0.892 | 26.05 | 20 | 20 | 3.24E-10 | 0.674  | 0.955 | v5.3 vs. v6.0 | KKI |
| LH_paracentral_thickavg     | ICC2 | 0.858 | 14.13 | 20 | 20 | 8.44E-08 | 0.720  | 0.931 | v5.3 vs. v7.1 | KKI |
| LH_paracentral_thickavg     | ICC3 | 0.801 | 9.06  | 20 | 20 | 3.71E-06 | 0.620  | 0.901 | v6.0          | KKI |
| LH_paracentral_thickavg     | ICC2 | 0.914 | 22.80 | 20 | 20 | 1.12E-09 | 0.827  | 0.958 | v6.0 vs. v7.1 | KKI |
| LH_paracentral_thickavg     | ICC3 | 0.858 | 13.06 | 20 | 20 | 1.68E-07 | 0.720  | 0.930 | v7.1          | KKI |
| LH parahippocampal_surfavg  | ICC3 | 0.840 | 11.52 | 20 | 20 | 4.98E-07 | 0.689  | 0.921 | v5.3          | KKI |
| LH parahippocampal_surfavg  | ICC2 | 0.652 | 5.64  | 20 | 20 | 1.49E-04 | 0.361  | 0.823 | v5.3 vs. v6.0 | KKI |
| LH parahippocampal_surfavg  | ICC2 | 0.504 | 3.18  | 20 | 20 | 6.46E-03 | 0.192  | 0.728 | v5.3 vs. v7.1 | KKI |
| LH parahippocampal_surfavg  | ICC3 | 0.866 | 13.96 | 20 | 20 | 9.39E-08 | 0.736  | 0.935 | v6.0          | KKI |
| LH parahippocampal_surfavg  | ICC2 | 0.879 | 15.12 | 20 | 20 | 4.63E-08 | 0.761  | 0.941 | v6.0 vs. v7.1 | KKI |
| LH parahippocampal_surfavg  | ICC3 | 0.879 | 15.58 | 20 | 20 | 3.54E-08 | 0.760  | 0.941 | v7.1          | KKI |
| LH parahippocampal_thickavg | ICC3 | 0.896 | 18.18 | 20 | 20 | 8.88E-09 | 0.791  | 0.950 | v5.3          | KKI |
| LH parahippocampal_thickavg | ICC2 | 0.947 | 37.11 | 20 | 20 | 1.15E-11 | 0.892  | 0.975 | v5.3 vs. v6.0 | KKI |
| LH parahippocampal_thickavg | ICC2 | 0.815 | 24.25 | 20 | 20 | 6.30E-10 | 0.184  | 0.936 | v5.3 vs. v7.1 | KKI |
| LH parahippocampal_thickavg | ICC3 | 0.927 | 26.43 | 20 | 20 | 2.83E-10 | 0.851  | 0.965 | v6.0          | KKI |
| LH parahippocampal_thickavg | ICC2 | 0.866 | 48.42 | 20 | 20 | 8.99E-13 | 0.138  | 0.959 | v6.0 vs. v7.1 | KKI |
| LH parahippocampal_thickavg | ICC3 | 0.946 | 36.29 | 20 | 20 | 1.42E-11 | 0.889  | 0.974 | v7.1          | KKI |
| LH_parsopercularis_surfavg  | ICC3 | 0.973 | 73.70 | 20 | 20 | 1.53E-14 | 0.944  | 0.987 | v5.3          | KKI |
| LH_parsopercularis_surfavg  | ICC2 | 0.903 | 33.56 | 20 | 20 | 2.99E-11 | 0.635  | 0.963 | v5.3 vs. v6.0 | KKI |
| LH_parsopercularis_surfavg  | ICC2 | 0.882 | 16.64 | 20 | 20 | 1.96E-08 | 0.766  | 0.942 | v5.3 vs. v7.1 | KKI |
| LH_parsopercularis_surfavg  | ICC3 | 0.845 | 11.87 | 20 | 20 | 3.84E-07 | 0.696  | 0.924 | v6.0          | KKI |
| LH_parsopercularis_surfavg  | ICC2 | 0.837 | 11.39 | 20 | 20 | 5.47E-07 | 0.687  | 0.919 | v6.0 vs. v7.1 | KKI |
| LH_parsopercularis_surfavg  | ICC3 | 0.878 | 15.46 | 20 | 20 | 3.81E-08 | 0.758  | 0.941 | v7.1          | KKI |
| LH_parsopercularis_thickavg | ICC3 | 0.862 | 13.46 | 20 | 20 | 1.29E-07 | 0.727  | 0.932 | v5.3          | KKI |
| LH_parsopercularis_thickavg | ICC2 | 0.801 | 10.35 | 20 | 20 | 1.23E-06 | 0.607  | 0.903 | v5.3 vs. v6.0 | KKI |
| LH_parsopercularis_thickavg | ICC2 | 0.842 | 11.70 | 20 | 20 | 4.35E-07 | 0.696  | 0.922 | v5.3 vs. v7.1 | KKI |

|                              |      |       |        |    |    |          |        |       |               |     |
|------------------------------|------|-------|--------|----|----|----------|--------|-------|---------------|-----|
| LH_parsopercularis_thickavg  | ICC3 | 0.836 | 11.21  | 20 | 20 | 6.26E-07 | 0.681  | 0.919 | v6.0          | KKI |
| LH_parsopercularis_thickavg  | ICC2 | 0.933 | 34.03  | 20 | 20 | 2.62E-11 | 0.850  | 0.969 | v6.0 vs. v7.1 | KKI |
| LH_parsopercularis_thickavg  | ICC3 | 0.873 | 14.76  | 20 | 20 | 5.74E-08 | 0.748  | 0.938 | v7.1          | KKI |
| LH_parsorbitalis_surfavg     | ICC3 | 0.889 | 17.03  | 20 | 20 | 1.60E-08 | 0.778  | 0.946 | v5.3          | KKI |
| LH_parsorbitalis_surfavg     | ICC2 | 0.610 | 14.22  | 20 | 20 | 7.95E-08 | -0.043 | 0.854 | v5.3 vs. v6.0 | KKI |
| LH_parsorbitalis_surfavg     | ICC2 | 0.508 | 13.50  | 20 | 20 | 1.26E-07 | -0.052 | 0.802 | v5.3 vs. v7.1 | KKI |
| LH_parsorbitalis_surfavg     | ICC3 | 0.964 | 54.06  | 20 | 20 | 3.10E-13 | 0.924  | 0.983 | v6.0          | KKI |
| LH_parsorbitalis_surfavg     | ICC2 | 0.932 | 58.07  | 20 | 20 | 1.55E-13 | 0.633  | 0.977 | v6.0 vs. v7.1 | KKI |
| LH_parsorbitalis_surfavg     | ICC3 | 0.981 | 104.98 | 20 | 20 | 4.78E-16 | 0.960  | 0.991 | v7.1          | KKI |
| LH_parsorbitalis_thickavg    | ICC3 | 0.918 | 23.53  | 20 | 20 | 8.35E-10 | 0.834  | 0.961 | v5.3          | KKI |
| LH_parsorbitalis_thickavg    | ICC2 | 0.848 | 11.62  | 20 | 20 | 4.61E-07 | 0.701  | 0.925 | v5.3 vs. v6.0 | KKI |
| LH_parsorbitalis_thickavg    | ICC2 | 0.890 | 17.57  | 20 | 20 | 1.21E-08 | 0.783  | 0.947 | v5.3 vs. v7.1 | KKI |
| LH_parsorbitalis_thickavg    | ICC3 | 0.893 | 17.66  | 20 | 20 | 1.15E-08 | 0.785  | 0.948 | v6.0          | KKI |
| LH_parsorbitalis_thickavg    | ICC2 | 0.934 | 31.81  | 20 | 20 | 4.96E-11 | 0.864  | 0.969 | v6.0 vs. v7.1 | KKI |
| LH_parsorbitalis_thickavg    | ICC3 | 0.924 | 25.23  | 20 | 20 | 4.37E-10 | 0.845  | 0.963 | v7.1          | KKI |
| LH_parstriangularis_surfavg  | ICC3 | 0.977 | 84.63  | 20 | 20 | 3.96E-15 | 0.951  | 0.989 | v5.3          | KKI |
| LH_parstriangularis_surfavg  | ICC2 | 0.892 | 25.73  | 20 | 20 | 3.63E-10 | 0.683  | 0.955 | v5.3 vs. v6.0 | KKI |
| LH_parstriangularis_surfavg  | ICC2 | 0.750 | 10.34  | 20 | 20 | 1.24E-06 | 0.389  | 0.889 | v5.3 vs. v7.1 | KKI |
| LH_parstriangularis_surfavg  | ICC3 | 0.941 | 32.86  | 20 | 20 | 3.65E-11 | 0.879  | 0.972 | v6.0          | KKI |
| LH_parstriangularis_surfavg  | ICC2 | 0.915 | 26.71  | 20 | 20 | 2.57E-10 | 0.811  | 0.961 | v6.0 vs. v7.1 | KKI |
| LH_parstriangularis_surfavg  | ICC3 | 0.909 | 20.93  | 20 | 20 | 2.45E-09 | 0.816  | 0.956 | v7.1          | KKI |
| LH_parstriangularis_thickavg | ICC3 | 0.968 | 62.02  | 20 | 20 | 8.21E-14 | 0.934  | 0.985 | v5.3          | KKI |
| LH_parstriangularis_thickavg | ICC2 | 0.903 | 24.83  | 20 | 20 | 5.06E-10 | 0.766  | 0.956 | v5.3 vs. v6.0 | KKI |
| LH_parstriangularis_thickavg | ICC2 | 0.873 | 15.11  | 20 | 20 | 4.65E-08 | 0.751  | 0.938 | v5.3 vs. v7.1 | KKI |
| LH_parstriangularis_thickavg | ICC3 | 0.943 | 34.01  | 20 | 20 | 2.64E-11 | 0.882  | 0.973 | v6.0          | KKI |
| LH_parstriangularis_thickavg | ICC2 | 0.957 | 49.97  | 20 | 20 | 6.64E-13 | 0.909  | 0.980 | v6.0 vs. v7.1 | KKI |
| LH_parstriangularis_thickavg | ICC3 | 0.903 | 19.58  | 20 | 20 | 4.52E-09 | 0.804  | 0.953 | v7.1          | KKI |
| LH_pericalcarine_surfavg     | ICC3 | 0.966 | 57.72  | 20 | 20 | 1.65E-13 | 0.929  | 0.984 | v5.3          | KKI |
| LH_pericalcarine_surfavg     | ICC2 | 0.908 | 28.78  | 20 | 20 | 1.27E-10 | 0.745  | 0.961 | v5.3 vs. v6.0 | KKI |
| LH_pericalcarine_surfavg     | ICC2 | 0.924 | 36.94  | 20 | 20 | 1.20E-11 | 0.768  | 0.969 | v5.3 vs. v7.1 | KKI |
| LH_pericalcarine_surfavg     | ICC3 | 0.983 | 116.96 | 20 | 20 | 1.65E-16 | 0.964  | 0.992 | v6.0          | KKI |
| LH_pericalcarine_surfavg     | ICC2 | 0.992 | 247.53 | 20 | 20 | 9.94E-20 | 0.984  | 0.996 | v6.0 vs. v7.1 | KKI |
| LH_pericalcarine_surfavg     | ICC3 | 0.991 | 221.02 | 20 | 20 | 3.06E-19 | 0.981  | 0.996 | v7.1          | KKI |
| LH_pericalcarine_thickavg    | ICC3 | 0.887 | 16.72  | 20 | 20 | 1.88E-08 | 0.775  | 0.945 | v5.3          | KKI |
| LH_pericalcarine_thickavg    | ICC2 | 0.806 | 21.25  | 20 | 20 | 2.13E-09 | 0.213  | 0.931 | v5.3 vs. v6.0 | KKI |
| LH_pericalcarine_thickavg    | ICC2 | 0.858 | 17.28  | 20 | 20 | 1.40E-08 | 0.658  | 0.937 | v5.3 vs. v7.1 | KKI |
| LH_pericalcarine_thickavg    | ICC3 | 0.886 | 16.62  | 20 | 20 | 1.99E-08 | 0.773  | 0.945 | v6.0          | KKI |
| LH_pericalcarine_thickavg    | ICC2 | 0.938 | 46.69  | 20 | 20 | 1.28E-12 | 0.802  | 0.975 | v6.0 vs. v7.1 | KKI |
| LH_pericalcarine_thickavg    | ICC3 | 0.928 | 26.81  | 20 | 20 | 2.48E-10 | 0.853  | 0.965 | v7.1          | KKI |
| LH_postcentral_surfavg       | ICC3 | 0.663 | 4.93   | 20 | 20 | 3.87E-04 | 0.398  | 0.826 | v5.3          | KKI |
| LH_postcentral_surfavg       | ICC2 | 0.532 | 3.24   | 20 | 20 | 5.75E-03 | 0.215  | 0.748 | v5.3 vs. v6.0 | KKI |
| LH_postcentral_surfavg       | ICC2 | 0.963 | 51.05  | 20 | 20 | 5.41E-13 | 0.923  | 0.982 | v5.3 vs. v7.1 | KKI |
| LH_postcentral_surfavg       | ICC3 | 0.483 | 2.87   | 20 | 20 | 1.13E-02 | 0.149  | 0.718 | v6.0          | KKI |
| LH_postcentral_surfavg       | ICC2 | 0.424 | 2.45   | 20 | 20 | 2.59E-02 | 0.076  | 0.680 | v6.0 vs. v7.1 | KKI |

|                                |      |       |        |    |    |          |        |       |               |     |
|--------------------------------|------|-------|--------|----|----|----------|--------|-------|---------------|-----|
| LH_postcentral_surfavg         | ICC3 | 0.347 | 2.06   | 20 | 20 | 5.67E-02 | -0.015 | 0.628 | v7.1          | KKI |
| LH_postcentral_thickavg        | ICC3 | 0.936 | 30.16  | 20 | 20 | 8.21E-11 | 0.868  | 0.969 | v5.3          | KKI |
| LH_postcentral_thickavg        | ICC2 | 0.835 | 22.96  | 20 | 20 | 1.04E-09 | 0.331  | 0.940 | v5.3 vs. v6.0 | KKI |
| LH_postcentral_thickavg        | ICC2 | 0.898 | 35.32  | 20 | 20 | 1.84E-11 | 0.549  | 0.963 | v5.3 vs. v7.1 | KKI |
| LH_postcentral_thickavg        | ICC3 | 0.951 | 39.43  | 20 | 20 | 6.45E-12 | 0.898  | 0.976 | v6.0          | KKI |
| LH_postcentral_thickavg        | ICC2 | 0.950 | 43.37  | 20 | 20 | 2.59E-12 | 0.893  | 0.976 | v6.0 vs. v7.1 | KKI |
| LH_postcentral_thickavg        | ICC3 | 0.950 | 39.13  | 20 | 20 | 6.94E-12 | 0.897  | 0.976 | v7.1          | KKI |
| LH_posteriorcingulate_surfavg  | ICC3 | 0.926 | 25.90  | 20 | 20 | 3.41E-10 | 0.848  | 0.964 | v5.3          | KKI |
| LH_posteriorcingulate_surfavg  | ICC2 | 0.780 | 7.80   | 20 | 20 | 1.25E-05 | 0.583  | 0.890 | v5.3 vs. v6.0 | KKI |
| LH_posteriorcingulate_surfavg  | ICC2 | 0.780 | 8.01   | 20 | 20 | 1.01E-05 | 0.588  | 0.890 | v5.3 vs. v7.1 | KKI |
| LH_posteriorcingulate_surfavg  | ICC3 | 0.981 | 106.55 | 20 | 20 | 4.13E-16 | 0.961  | 0.991 | v6.0          | KKI |
| LH_posteriorcingulate_surfavg  | ICC2 | 0.970 | 135.58 | 20 | 20 | 3.85E-17 | 0.813  | 0.990 | v6.0 vs. v7.1 | KKI |
| LH_posteriorcingulate_surfavg  | ICC3 | 0.984 | 123.16 | 20 | 20 | 9.93E-17 | 0.966  | 0.992 | v7.1          | KKI |
| LH_posteriorcingulate_thickavg | ICC3 | 0.911 | 21.49  | 20 | 20 | 1.93E-09 | 0.820  | 0.957 | v5.3          | KKI |
| LH_posteriorcingulate_thickavg | ICC2 | 0.686 | 10.05  | 20 | 20 | 1.57E-06 | 0.149  | 0.870 | v5.3 vs. v6.0 | KKI |
| LH_posteriorcingulate_thickavg | ICC2 | 0.401 | 9.80   | 20 | 20 | 1.94E-06 | -0.055 | 0.727 | v5.3 vs. v7.1 | KKI |
| LH_posteriorcingulate_thickavg | ICC3 | 0.831 | 10.80  | 20 | 20 | 8.56E-07 | 0.671  | 0.916 | v6.0          | KKI |
| LH_posteriorcingulate_thickavg | ICC2 | 0.651 | 17.96  | 20 | 20 | 9.87E-09 | -0.036 | 0.876 | v6.0 vs. v7.1 | KKI |
| LH_posteriorcingulate_thickavg | ICC3 | 0.902 | 19.40  | 20 | 20 | 4.92E-09 | 0.803  | 0.953 | v7.1          | KKI |
| LH_precentral_surfavg          | ICC3 | 0.973 | 72.52  | 20 | 20 | 1.79E-14 | 0.943  | 0.987 | v5.3          | KKI |
| LH_precentral_surfavg          | ICC2 | 0.967 | 57.15  | 20 | 20 | 1.81E-13 | 0.931  | 0.984 | v5.3 vs. v6.0 | KKI |
| LH_precentral_surfavg          | ICC2 | 0.665 | 4.95   | 20 | 20 | 3.77E-04 | 0.406  | 0.826 | v5.3 vs. v7.1 | KKI |
| LH_precentral_surfavg          | ICC3 | 0.710 | 5.90   | 20 | 20 | 1.07E-04 | 0.471  | 0.852 | v6.0          | KKI |
| LH_precentral_surfavg          | ICC2 | 0.696 | 5.68   | 20 | 20 | 1.41E-04 | 0.456  | 0.844 | v6.0 vs. v7.1 | KKI |
| LH_precentral_surfavg          | ICC3 | 0.741 | 6.73   | 20 | 20 | 3.96E-05 | 0.520  | 0.869 | v7.1          | KKI |
| LH_precentral_thickavg         | ICC3 | 0.798 | 8.91   | 20 | 20 | 4.27E-06 | 0.615  | 0.900 | v5.3          | KKI |
| LH_precentral_thickavg         | ICC2 | 0.740 | 13.81  | 20 | 20 | 1.03E-07 | 0.167  | 0.900 | v5.3 vs. v6.0 | KKI |
| LH_precentral_thickavg         | ICC2 | 0.883 | 17.20  | 20 | 20 | 1.46E-08 | 0.768  | 0.943 | v5.3 vs. v7.1 | KKI |
| LH_precentral_thickavg         | ICC3 | 0.636 | 4.50   | 20 | 20 | 7.29E-04 | 0.358  | 0.811 | v6.0          | KKI |
| LH_precentral_thickavg         | ICC2 | 0.621 | 4.71   | 20 | 20 | 5.33E-04 | 0.340  | 0.801 | v6.0 vs. v7.1 | KKI |
| LH_precentral_thickavg         | ICC3 | 0.580 | 3.76   | 20 | 20 | 2.35E-03 | 0.278  | 0.777 | v7.1          | KKI |
| LH_precuneus_surfavg           | ICC3 | 0.952 | 40.41  | 20 | 20 | 5.11E-12 | 0.900  | 0.977 | v5.3          | KKI |
| LH_precuneus_surfavg           | ICC2 | 0.924 | 24.64  | 20 | 20 | 5.44E-10 | 0.847  | 0.964 | v5.3 vs. v6.0 | KKI |
| LH_precuneus_surfavg           | ICC2 | 0.922 | 24.16  | 20 | 20 | 6.52E-10 | 0.842  | 0.962 | v5.3 vs. v7.1 | KKI |
| LH_precuneus_surfavg           | ICC3 | 0.994 | 360.53 | 20 | 20 | 2.37E-21 | 0.988  | 0.997 | v6.0          | KKI |
| LH_precuneus_surfavg           | ICC2 | 0.995 | 374.74 | 20 | 20 | 1.61E-21 | 0.989  | 0.997 | v6.0 vs. v7.1 | KKI |
| LH_precuneus_surfavg           | ICC3 | 0.993 | 282.78 | 20 | 20 | 2.65E-20 | 0.985  | 0.997 | v7.1          | KKI |
| LH_precuneus_thickavg          | ICC3 | 0.891 | 17.36  | 20 | 20 | 1.35E-08 | 0.782  | 0.947 | v5.3          | KKI |
| LH_precuneus_thickavg          | ICC2 | 0.937 | 43.24  | 20 | 20 | 2.67E-12 | 0.814  | 0.974 | v5.3 vs. v6.0 | KKI |
| LH_precuneus_thickavg          | ICC2 | 0.957 | 43.68  | 20 | 20 | 2.42E-12 | 0.911  | 0.979 | v5.3 vs. v7.1 | KKI |
| LH_precuneus_thickavg          | ICC3 | 0.887 | 16.62  | 20 | 20 | 1.99E-08 | 0.773  | 0.945 | v6.0          | KKI |
| LH_precuneus_thickavg          | ICC2 | 0.955 | 120.66 | 20 | 20 | 1.22E-16 | 0.567  | 0.986 | v6.0 vs. v7.1 | KKI |
| LH_precuneus_thickavg          | ICC3 | 0.882 | 15.94  | 20 | 20 | 2.90E-08 | 0.765  | 0.943 | v7.1          | KKI |
| LH_Putamen                     | ICC3 | 0.853 | 12.63  | 20 | 20 | 2.25E-07 | 0.712  | 0.928 | v5.3          | KKI |

|                                      |      |       |        |    |    |          |        |       |               |     |
|--------------------------------------|------|-------|--------|----|----|----------|--------|-------|---------------|-----|
| LH_Putamen                           | ICC2 | 0.347 | 9.14   | 20 | 20 | 3.46E-06 | -0.050 | 0.683 | v5.3 vs. v6.0 | KKI |
| LH_Putamen                           | ICC2 | 0.349 | 8.13   | 20 | 20 | 8.99E-06 | -0.056 | 0.682 | v5.3 vs. v7.1 | KKI |
| LH_Putamen                           | ICC3 | 0.993 | 293.74 | 20 | 20 | 1.82E-20 | 0.986  | 0.997 | v6.0          | KKI |
| LH_Putamen                           | ICC2 | 0.981 | 124.33 | 20 | 20 | 9.05E-17 | 0.955  | 0.991 | v6.0 vs. v7.1 | KKI |
| LH_Putamen                           | ICC3 | 0.987 | 152.27 | 20 | 20 | 1.22E-17 | 0.972  | 0.994 | v7.1          | KKI |
| LH_rostralanteriorcingulate_surfavg  | ICC3 | 0.942 | 33.34  | 20 | 20 | 3.18E-11 | 0.880  | 0.972 | v5.3          | KKI |
| LH_rostralanteriorcingulate_surfavg  | ICC2 | 0.834 | 11.86  | 20 | 20 | 3.86E-07 | 0.677  | 0.918 | v5.3 vs. v6.0 | KKI |
| LH_rostralanteriorcingulate_surfavg  | ICC2 | 0.781 | 8.24   | 20 | 20 | 8.03E-06 | 0.591  | 0.890 | v5.3 vs. v7.1 | KKI |
| LH_rostralanteriorcingulate_surfavg  | ICC3 | 0.929 | 27.18  | 20 | 20 | 2.18E-10 | 0.855  | 0.966 | v6.0          | KKI |
| LH_rostralanteriorcingulate_surfavg  | ICC2 | 0.893 | 37.90  | 20 | 20 | 9.41E-12 | 0.458  | 0.963 | v6.0 vs. v7.1 | KKI |
| LH_rostralanteriorcingulate_surfavg  | ICC3 | 0.908 | 20.65  | 20 | 20 | 2.77E-09 | 0.813  | 0.955 | v7.1          | KKI |
| LH_rostralanteriorcingulate_thickavg | ICC3 | 0.910 | 21.22  | 20 | 20 | 2.16E-09 | 0.818  | 0.957 | v5.3          | KKI |
| LH_rostralanteriorcingulate_thickavg | ICC2 | 0.880 | 23.99  | 20 | 20 | 6.96E-10 | 0.634  | 0.951 | v5.3 vs. v6.0 | KKI |
| LH_rostralanteriorcingulate_thickavg | ICC2 | 0.380 | 7.08   | 20 | 20 | 2.67E-05 | -0.066 | 0.704 | v5.3 vs. v7.1 | KKI |
| LH_rostralanteriorcingulate_thickavg | ICC3 | 0.816 | 9.89   | 20 | 20 | 1.80E-06 | 0.646  | 0.909 | v6.0          | KKI |
| LH_rostralanteriorcingulate_thickavg | ICC2 | 0.539 | 11.98  | 20 | 20 | 3.55E-07 | -0.055 | 0.816 | v6.0 vs. v7.1 | KKI |
| LH_rostralanteriorcingulate_thickavg | ICC3 | 0.825 | 10.42  | 20 | 20 | 1.16E-06 | 0.661  | 0.914 | v7.1          | KKI |
| LH_rostralmiddlefrontal_surfavg      | ICC3 | 0.963 | 52.48  | 20 | 20 | 4.14E-13 | 0.922  | 0.982 | v5.3          | KKI |
| LH_rostralmiddlefrontal_surfavg      | ICC2 | 0.942 | 31.74  | 20 | 20 | 5.07E-11 | 0.880  | 0.972 | v5.3 vs. v6.0 | KKI |
| LH_rostralmiddlefrontal_surfavg      | ICC2 | 0.870 | 14.19  | 20 | 20 | 8.12E-08 | 0.744  | 0.936 | v5.3 vs. v7.1 | KKI |
| LH_rostralmiddlefrontal_surfavg      | ICC3 | 0.882 | 16.02  | 20 | 20 | 2.77E-08 | 0.766  | 0.943 | v6.0          | KKI |
| LH_rostralmiddlefrontal_surfavg      | ICC2 | 0.856 | 12.77  | 20 | 20 | 2.05E-07 | 0.720  | 0.929 | v6.0 vs. v7.1 | KKI |
| LH_rostralmiddlefrontal_surfavg      | ICC3 | 0.848 | 12.20  | 20 | 20 | 3.04E-07 | 0.703  | 0.926 | v7.1          | KKI |
| LH_rostralmiddlefrontal_thickavg     | ICC3 | 0.795 | 8.78   | 20 | 20 | 4.82E-06 | 0.610  | 0.898 | v5.3          | KKI |
| LH_rostralmiddlefrontal_thickavg     | ICC2 | 0.833 | 19.53  | 20 | 20 | 4.62E-09 | 0.426  | 0.935 | v5.3 vs. v6.0 | KKI |
| LH_rostralmiddlefrontal_thickavg     | ICC2 | 0.815 | 15.14  | 20 | 20 | 4.58E-08 | 0.479  | 0.922 | v5.3 vs. v7.1 | KKI |
| LH_rostralmiddlefrontal_thickavg     | ICC3 | 0.815 | 9.80   | 20 | 20 | 1.95E-06 | 0.644  | 0.908 | v6.0          | KKI |
| LH_rostralmiddlefrontal_thickavg     | ICC2 | 0.939 | 30.64  | 20 | 20 | 7.08E-11 | 0.875  | 0.971 | v6.0 vs. v7.1 | KKI |
| LH_rostralmiddlefrontal_thickavg     | ICC3 | 0.797 | 8.84   | 20 | 20 | 4.54E-06 | 0.613  | 0.899 | v7.1          | KKI |
| LH_superiorfrontal_surfavg           | ICC3 | 0.986 | 142.02 | 20 | 20 | 2.44E-17 | 0.971  | 0.993 | v5.3          | KKI |
| LH_superiorfrontal_surfavg           | ICC2 | 0.942 | 68.36  | 20 | 20 | 3.18E-14 | 0.667  | 0.980 | v5.3 vs. v6.0 | KKI |
| LH_superiorfrontal_surfavg           | ICC2 | 0.858 | 39.90  | 20 | 20 | 5.76E-12 | 0.169  | 0.955 | v5.3 vs. v7.1 | KKI |
| LH_superiorfrontal_surfavg           | ICC3 | 0.922 | 24.73  | 20 | 20 | 5.25E-10 | 0.842  | 0.963 | v6.0          | KKI |
| LH_superiorfrontal_surfavg           | ICC2 | 0.922 | 32.00  | 20 | 20 | 4.70E-11 | 0.801  | 0.966 | v6.0 vs. v7.1 | KKI |
| LH_superiorfrontal_surfavg           | ICC3 | 0.949 | 38.08  | 20 | 20 | 8.99E-12 | 0.894  | 0.976 | v7.1          | KKI |
| LH_superiorfrontal_thickavg          | ICC3 | 0.826 | 10.49  | 20 | 20 | 1.10E-06 | 0.663  | 0.914 | v5.3          | KKI |
| LH_superiorfrontal_thickavg          | ICC2 | 0.939 | 31.99  | 20 | 20 | 4.71E-11 | 0.876  | 0.971 | v5.3 vs. v6.0 | KKI |
| LH_superiorfrontal_thickavg          | ICC2 | 0.939 | 31.71  | 20 | 20 | 5.11E-11 | 0.875  | 0.970 | v5.3 vs. v7.1 | KKI |
| LH_superiorfrontal_thickavg          | ICC3 | 0.848 | 12.13  | 20 | 20 | 3.19E-07 | 0.702  | 0.925 | v6.0          | KKI |
| LH_superiorfrontal_thickavg          | ICC2 | 0.958 | 61.94  | 20 | 20 | 8.30E-14 | 0.885  | 0.982 | v6.0 vs. v7.1 | KKI |
| LH_superiorfrontal_thickavg          | ICC3 | 0.903 | 19.72  | 20 | 20 | 4.23E-09 | 0.806  | 0.953 | v7.1          | KKI |
| LH_superiorparietal_surfavg          | ICC3 | 0.996 | 472.47 | 20 | 20 | 1.60E-22 | 0.991  | 0.998 | v5.3          | KKI |
| LH_superiorparietal_surfavg          | ICC2 | 0.968 | 68.16  | 20 | 20 | 3.28E-14 | 0.930  | 0.985 | v5.3 vs. v6.0 | KKI |
| LH_superiorparietal_surfavg          | ICC2 | 0.972 | 81.21  | 20 | 20 | 5.93E-15 | 0.938  | 0.987 | v5.3 vs. v7.1 | KKI |



|                              |      |       |         |    |    |          |        |       |               |     |
|------------------------------|------|-------|---------|----|----|----------|--------|-------|---------------|-----|
| LH_superiorparietal_surfvag  | ICC3 | 0.990 | 203.47  | 20 | 20 | 6.95E-19 | 0.979  | 0.995 | v6.0          | KKI |
| LH_superiorparietal_surfvag  | ICC2 | 0.997 | 632.59  | 20 | 20 | 8.75E-24 | 0.994  | 0.999 | v6.0 vs. v7.1 | KKI |
| LH_superiorparietal_surfvag  | ICC3 | 0.993 | 289.90  | 20 | 20 | 2.07E-20 | 0.985  | 0.997 | v7.1          | KKI |
| LH_superiorparietal_thickavg | ICC3 | 0.863 | 13.55   | 20 | 20 | 1.21E-07 | 0.729  | 0.933 | v5.3          | KKI |
| LH_superiorparietal_thickavg | ICC2 | 0.890 | 41.31   | 20 | 20 | 4.13E-12 | 0.377  | 0.963 | v5.3 vs. v6.0 | KKI |
| LH_superiorparietal_thickavg | ICC2 | 0.916 | 43.56   | 20 | 20 | 2.48E-12 | 0.606  | 0.970 | v5.3 vs. v7.1 | KKI |
| LH_superiorparietal_thickavg | ICC3 | 0.874 | 14.83   | 20 | 20 | 5.48E-08 | 0.749  | 0.938 | v6.0          | KKI |
| LH_superiorparietal_thickavg | ICC2 | 0.969 | 70.25   | 20 | 20 | 2.44E-14 | 0.933  | 0.985 | v6.0 vs. v7.1 | KKI |
| LH_superiorparietal_thickavg | ICC3 | 0.917 | 23.08   | 20 | 20 | 9.96E-10 | 0.831  | 0.960 | v7.1          | KKI |
| LH_superiortemporal_surfvag  | ICC3 | 0.984 | 127.13  | 20 | 20 | 7.26E-17 | 0.967  | 0.993 | v5.3          | KKI |
| LH_superiortemporal_surfvag  | ICC2 | 0.845 | 55.79   | 20 | 20 | 2.29E-13 | 0.044  | 0.954 | v5.3 vs. v6.0 | KKI |
| LH_superiortemporal_surfvag  | ICC2 | 0.788 | 63.65   | 20 | 20 | 6.38E-14 | -0.007 | 0.937 | v5.3 vs. v7.1 | KKI |
| LH_superiortemporal_surfvag  | ICC3 | 0.992 | 252.48  | 20 | 20 | 8.17E-20 | 0.983  | 0.996 | v6.0          | KKI |
| LH_superiortemporal_surfvag  | ICC2 | 0.981 | 206.07  | 20 | 20 | 6.13E-19 | 0.888  | 0.994 | v6.0 vs. v7.1 | KKI |
| LH_superiortemporal_surfvag  | ICC3 | 0.994 | 356.54  | 20 | 20 | 2.64E-21 | 0.988  | 0.997 | v7.1          | KKI |
| LH_superiortemporal_thickavg | ICC3 | 0.969 | 62.73   | 20 | 20 | 7.35E-14 | 0.934  | 0.985 | v5.3          | KKI |
| LH_superiortemporal_thickavg | ICC2 | 0.979 | 97.50   | 20 | 20 | 9.88E-16 | 0.957  | 0.990 | v5.3 vs. v6.0 | KKI |
| LH_superiortemporal_thickavg | ICC2 | 0.953 | 73.15   | 20 | 20 | 1.65E-14 | 0.789  | 0.983 | v5.3 vs. v7.1 | KKI |
| LH_superiortemporal_thickavg | ICC3 | 0.959 | 48.18   | 20 | 20 | 9.44E-13 | 0.916  | 0.981 | v6.0          | KKI |
| LH_superiortemporal_thickavg | ICC2 | 0.965 | 84.03   | 20 | 20 | 4.24E-15 | 0.884  | 0.986 | v6.0 vs. v7.1 | KKI |
| LH_superiortemporal_thickavg | ICC3 | 0.953 | 41.49   | 20 | 20 | 3.97E-12 | 0.903  | 0.978 | v7.1          | KKI |
| LH_supramarginal_surfvag     | ICC3 | 0.947 | 36.50   | 20 | 20 | 1.35E-11 | 0.890  | 0.975 | v5.3          | KKI |
| LH_supramarginal_surfvag     | ICC2 | 0.776 | 16.25   | 20 | 20 | 2.43E-08 | 0.225  | 0.916 | v5.3 vs. v6.0 | KKI |
| LH_supramarginal_surfvag     | ICC2 | 0.776 | 19.44   | 20 | 20 | 4.83E-09 | 0.131  | 0.920 | v5.3 vs. v7.1 | KKI |
| LH_supramarginal_surfvag     | ICC3 | 0.920 | 23.94   | 20 | 20 | 7.10E-10 | 0.837  | 0.961 | v6.0          | KKI |
| LH_supramarginal_surfvag     | ICC2 | 0.973 | 69.66   | 20 | 20 | 2.65E-14 | 0.943  | 0.987 | v6.0 vs. v7.1 | KKI |
| LH_supramarginal_surfvag     | ICC3 | 0.967 | 59.60   | 20 | 20 | 1.21E-13 | 0.931  | 0.984 | v7.1          | KKI |
| LH_supramarginal_thickavg    | ICC3 | 0.835 | 11.13   | 20 | 20 | 6.65E-07 | 0.680  | 0.919 | v5.3          | KKI |
| LH_supramarginal_thickavg    | ICC2 | 0.873 | 17.25   | 20 | 20 | 1.42E-08 | 0.730  | 0.940 | v5.3 vs. v6.0 | KKI |
| LH_supramarginal_thickavg    | ICC2 | 0.793 | 8.33    | 20 | 20 | 7.35E-06 | 0.605  | 0.897 | v5.3 vs. v7.1 | KKI |
| LH_supramarginal_thickavg    | ICC3 | 0.806 | 9.32    | 20 | 20 | 2.95E-06 | 0.629  | 0.904 | v6.0          | KKI |
| LH_supramarginal_thickavg    | ICC2 | 0.872 | 17.06   | 20 | 20 | 1.57E-08 | 0.731  | 0.940 | v6.0 vs. v7.1 | KKI |
| LH_supramarginal_thickavg    | ICC3 | 0.840 | 11.47   | 20 | 20 | 5.15E-07 | 0.687  | 0.921 | v7.1          | KKI |
| LH_SurfArea                  | ICC3 | 0.995 | 428.27  | 20 | 20 | 4.27E-22 | 0.990  | 0.998 | v5.3          | KKI |
| LH_SurfArea                  | ICC2 | 0.981 | 1190.32 | 20 | 20 | 1.59E-26 | 0.296  | 0.995 | v5.3 vs. v6.0 | KKI |
| LH_SurfArea                  | ICC2 | 0.954 | 541.96  | 20 | 20 | 4.09E-23 | 0.123  | 0.989 | v5.3 vs. v7.1 | KKI |
| LH_SurfArea                  | ICC3 | 0.996 | 485.35  | 20 | 20 | 1.23E-22 | 0.991  | 0.998 | v6.0          | KKI |
| LH_SurfArea                  | ICC2 | 0.993 | 1571.64 | 20 | 20 | 9.93E-28 | 0.720  | 0.998 | v6.0 vs. v7.1 | KKI |
| LH_SurfArea                  | ICC3 | 0.997 | 660.51  | 20 | 20 | 5.69E-24 | 0.994  | 0.999 | v7.1          | KKI |
| LH_temporalpole_surfvag      | ICC3 | 0.710 | 5.91    | 20 | 20 | 1.06E-04 | 0.471  | 0.852 | v5.3          | KKI |
| LH_temporalpole_surfvag      | ICC2 | 0.587 | 4.99    | 20 | 20 | 3.58E-04 | 0.235  | 0.790 | v5.3 vs. v6.0 | KKI |
| LH_temporalpole_surfvag      | ICC2 | 0.418 | 3.75    | 20 | 20 | 2.40E-03 | 0.005  | 0.692 | v5.3 vs. v7.1 | KKI |
| LH_temporalpole_surfvag      | ICC3 | 0.802 | 9.09    | 20 | 20 | 3.62E-06 | 0.621  | 0.902 | v6.0          | KKI |
| LH_temporalpole_surfvag      | ICC2 | 0.765 | 11.75   | 20 | 20 | 4.20E-07 | 0.375  | 0.900 | v6.0 vs. v7.1 | KKI |

|                                |      |       |       |    |    |          |        |       |               |     |
|--------------------------------|------|-------|-------|----|----|----------|--------|-------|---------------|-----|
| LH_temporalpole_surfav         | ICC3 | 0.827 | 10.54 | 20 | 20 | 1.05E-06 | 0.665  | 0.915 | v7.1          | KKI |
| LH_temporalpole_thickavg       | ICC3 | 0.690 | 5.46  | 20 | 20 | 1.89E-04 | 0.440  | 0.841 | v5.3          | KKI |
| LH_temporalpole_thickavg       | ICC2 | 0.724 | 6.35  | 20 | 20 | 6.12E-05 | 0.498  | 0.859 | v5.3 vs. v6.0 | KKI |
| LH_temporalpole_thickavg       | ICC2 | 0.701 | 10.82 | 20 | 20 | 8.49E-07 | 0.161  | 0.878 | v5.3 vs. v7.1 | KKI |
| LH_temporalpole_thickavg       | ICC3 | 0.675 | 5.16  | 20 | 20 | 2.82E-04 | 0.417  | 0.833 | v6.0          | KKI |
| LH_temporalpole_thickavg       | ICC2 | 0.635 | 6.19  | 20 | 20 | 7.44E-05 | 0.260  | 0.824 | v6.0 vs. v7.1 | KKI |
| LH_temporalpole_thickavg       | ICC3 | 0.433 | 2.53  | 20 | 20 | 2.21E-02 | 0.087  | 0.686 | v7.1          | KKI |
| LH_Thalamus                    | ICC3 | 0.883 | 16.04 | 20 | 20 | 2.73E-08 | 0.766  | 0.943 | v5.3          | KKI |
| LH_Thalamus                    | ICC2 | 0.725 | 11.03 | 20 | 20 | 7.20E-07 | 0.238  | 0.886 | v5.3 vs. v6.0 | KKI |
| LH_Thalamus                    | ICC2 | 0.701 | 6.21  | 20 | 20 | 7.28E-05 | 0.458  | 0.847 | v5.3 vs. v7.1 | KKI |
| LH_Thalamus                    | ICC3 | 0.938 | 31.35 | 20 | 20 | 5.70E-11 | 0.873  | 0.970 | v6.0          | KKI |
| LH_Thalamus                    | ICC2 | 0.865 | 18.17 | 20 | 20 | 8.90E-09 | 0.673  | 0.940 | v6.0 vs. v7.1 | KKI |
| LH_Thalamus                    | ICC3 | 0.956 | 44.77 | 20 | 20 | 1.91E-12 | 0.909  | 0.979 | v7.1          | KKI |
| LH_Thickness                   | ICC3 | 0.925 | 25.73 | 20 | 20 | 3.64E-10 | 0.847  | 0.964 | v5.3          | KKI |
| LH_Thickness                   | ICC2 | 0.930 | 45.91 | 20 | 20 | 1.50E-12 | 0.734  | 0.973 | v5.3 vs. v6.0 | KKI |
| LH_Thickness                   | ICC2 | 0.946 | 35.51 | 20 | 20 | 1.75E-11 | 0.889  | 0.974 | v5.3 vs. v7.1 | KKI |
| LH_Thickness                   | ICC3 | 0.913 | 21.90 | 20 | 20 | 1.62E-09 | 0.823  | 0.958 | v6.0          | KKI |
| LH_Thickness                   | ICC2 | 0.923 | 76.70 | 20 | 20 | 1.04E-14 | 0.343  | 0.977 | v6.0 vs. v7.1 | KKI |
| LH_Thickness                   | ICC3 | 0.926 | 26.04 | 20 | 20 | 3.25E-10 | 0.849  | 0.964 | v7.1          | KKI |
| LH_transversetemporal_surfav   | ICC3 | 0.950 | 38.96 | 20 | 20 | 7.24E-12 | 0.897  | 0.976 | v5.3          | KKI |
| LH_transversetemporal_surfav   | ICC2 | 0.914 | 37.87 | 20 | 20 | 9.49E-12 | 0.667  | 0.967 | v5.3 vs. v6.0 | KKI |
| LH_transversetemporal_surfav   | ICC2 | 0.924 | 27.75 | 20 | 20 | 1.80E-10 | 0.843  | 0.964 | v5.3 vs. v7.1 | KKI |
| LH_transversetemporal_surfav   | ICC3 | 0.962 | 51.51 | 20 | 20 | 4.95E-13 | 0.921  | 0.982 | v6.0          | KKI |
| LH_transversetemporal_surfav   | ICC2 | 0.953 | 54.99 | 20 | 20 | 2.63E-13 | 0.875  | 0.980 | v6.0 vs. v7.1 | KKI |
| LH_transversetemporal_surfav   | ICC3 | 0.979 | 95.83 | 20 | 20 | 1.17E-15 | 0.957  | 0.990 | v7.1          | KKI |
| LH_transversetemporal_thickavg | ICC3 | 0.907 | 20.61 | 20 | 20 | 2.83E-09 | 0.813  | 0.955 | v5.3          | KKI |
| LH_transversetemporal_thickavg | ICC2 | 0.847 | 32.34 | 20 | 20 | 4.25E-11 | 0.207  | 0.949 | v5.3 vs. v6.0 | KKI |
| LH_transversetemporal_thickavg | ICC2 | 0.827 | 30.37 | 20 | 20 | 7.69E-11 | 0.137  | 0.943 | v5.3 vs. v7.1 | KKI |
| LH_transversetemporal_thickavg | ICC3 | 0.816 | 9.87  | 20 | 20 | 1.84E-06 | 0.646  | 0.909 | v6.0          | KKI |
| LH_transversetemporal_thickavg | ICC2 | 0.954 | 40.73 | 20 | 20 | 4.73E-12 | 0.905  | 0.978 | v6.0 vs. v7.1 | KKI |
| LH_transversetemporal_thickavg | ICC3 | 0.803 | 9.16  | 20 | 20 | 3.40E-06 | 0.624  | 0.902 | v7.1          | KKI |
| RH_Accumbens                   | ICC3 | 0.825 | 10.41 | 20 | 20 | 1.17E-06 | 0.661  | 0.913 | v5.3          | KKI |
| RH_Accumbens                   | ICC2 | 0.484 | 11.48 | 20 | 20 | 5.12E-07 | -0.056 | 0.785 | v5.3 vs. v6.0 | KKI |
| RH_Accumbens                   | ICC2 | 0.673 | 10.67 | 20 | 20 | 9.52E-07 | 0.084  | 0.869 | v5.3 vs. v7.1 | KKI |
| RH_Accumbens                   | ICC3 | 0.859 | 13.14 | 20 | 20 | 1.59E-07 | 0.722  | 0.931 | v6.0          | KKI |
| RH_Accumbens                   | ICC2 | 0.792 | 12.57 | 20 | 20 | 2.34E-07 | 0.473  | 0.909 | v6.0 vs. v7.1 | KKI |
| RH_Accumbens                   | ICC3 | 0.813 | 9.69  | 20 | 20 | 2.13E-06 | 0.640  | 0.907 | v7.1          | KKI |
| RH_Amygdala                    | ICC3 | 0.906 | 20.36 | 20 | 20 | 3.17E-09 | 0.811  | 0.955 | v5.3          | KKI |
| RH_Amygdala                    | ICC2 | 0.651 | 9.37  | 20 | 20 | 2.81E-06 | 0.085  | 0.855 | v5.3 vs. v6.0 | KKI |
| RH_Amygdala                    | ICC2 | 0.591 | 7.87  | 20 | 20 | 1.17E-05 | 0.030  | 0.825 | v5.3 vs. v7.1 | KKI |
| RH_Amygdala                    | ICC3 | 0.924 | 25.45 | 20 | 20 | 4.02E-10 | 0.846  | 0.964 | v6.0          | KKI |
| RH_Amygdala                    | ICC2 | 0.923 | 25.51 | 20 | 20 | 3.94E-10 | 0.846  | 0.963 | v6.0 vs. v7.1 | KKI |
| RH_Amygdala                    | ICC3 | 0.906 | 20.34 | 20 | 20 | 3.18E-09 | 0.811  | 0.955 | v7.1          | KKI |
| RH_bankssts_surfav             | ICC3 | 0.853 | 12.58 | 20 | 20 | 2.33E-07 | 0.711  | 0.928 | v5.3          | KKI |

|                                     |      |       |        |    |    |          |        |       |               |     |
|-------------------------------------|------|-------|--------|----|----|----------|--------|-------|---------------|-----|
| RH_bankssts_surfavg                 | ICC2 | 0.873 | 36.67  | 20 | 20 | 1.29E-11 | 0.306  | 0.958 | v5.3 vs. v6.0 | KKI |
| RH_bankssts_surfavg                 | ICC2 | 0.841 | 28.19  | 20 | 20 | 1.55E-10 | 0.245  | 0.946 | v5.3 vs. v7.1 | KKI |
| RH_bankssts_surfavg                 | ICC3 | 0.985 | 135.28 | 20 | 20 | 3.94E-17 | 0.969  | 0.993 | v6.0          | KKI |
| RH_bankssts_surfavg                 | ICC2 | 0.980 | 95.97  | 20 | 20 | 1.16E-15 | 0.958  | 0.990 | v6.0 vs. v7.1 | KKI |
| RH_bankssts_surfavg                 | ICC3 | 0.963 | 53.52  | 20 | 20 | 3.42E-13 | 0.924  | 0.983 | v7.1          | KKI |
| RH_bankssts_thickavg                | ICC3 | 0.885 | 16.36  | 20 | 20 | 2.30E-08 | 0.770  | 0.944 | v5.3          | KKI |
| RH_bankssts_thickavg                | ICC2 | 0.918 | 23.30  | 20 | 20 | 9.14E-10 | 0.836  | 0.961 | v5.3 vs. v6.0 | KKI |
| RH_bankssts_thickavg                | ICC2 | 0.903 | 20.07  | 20 | 20 | 3.61E-09 | 0.806  | 0.953 | v5.3 vs. v7.1 | KKI |
| RH_bankssts_thickavg                | ICC3 | 0.942 | 33.26  | 20 | 20 | 3.26E-11 | 0.880  | 0.972 | v6.0          | KKI |
| RH_bankssts_thickavg                | ICC2 | 0.934 | 39.82  | 20 | 20 | 5.88E-12 | 0.820  | 0.972 | v6.0 vs. v7.1 | KKI |
| RH_bankssts_thickavg                | ICC3 | 0.905 | 19.97  | 20 | 20 | 3.78E-09 | 0.808  | 0.954 | v7.1          | KKI |
| RH_caudalanteriorcingulate_surfavg  | ICC3 | 0.969 | 62.73  | 20 | 20 | 7.35E-14 | 0.934  | 0.985 | v5.3          | KKI |
| RH_caudalanteriorcingulate_surfavg  | ICC2 | 0.801 | 18.15  | 20 | 20 | 9.01E-09 | 0.282  | 0.925 | v5.3 vs. v6.0 | KKI |
| RH_caudalanteriorcingulate_surfavg  | ICC2 | 0.834 | 12.36  | 20 | 20 | 2.71E-07 | 0.671  | 0.919 | v5.3 vs. v7.1 | KKI |
| RH_caudalanteriorcingulate_surfavg  | ICC3 | 0.959 | 47.51  | 20 | 20 | 1.08E-12 | 0.914  | 0.980 | v6.0          | KKI |
| RH_caudalanteriorcingulate_surfavg  | ICC2 | 0.931 | 60.67  | 20 | 20 | 1.02E-13 | 0.595  | 0.977 | v6.0 vs. v7.1 | KKI |
| RH_caudalanteriorcingulate_surfavg  | ICC3 | 0.964 | 54.95  | 20 | 20 | 2.65E-13 | 0.926  | 0.983 | v7.1          | KKI |
| RH_caudalanteriorcingulate_thickavg | ICC3 | 0.945 | 35.48  | 20 | 20 | 1.76E-11 | 0.887  | 0.974 | v5.3          | KKI |
| RH_caudalanteriorcingulate_thickavg | ICC2 | 0.875 | 19.25  | 20 | 20 | 5.28E-09 | 0.706  | 0.944 | v5.3 vs. v6.0 | KKI |
| RH_caudalanteriorcingulate_thickavg | ICC2 | 0.506 | 7.22   | 20 | 20 | 2.30E-05 | -0.044 | 0.782 | v5.3 vs. v7.1 | KKI |
| RH_caudalanteriorcingulate_thickavg | ICC3 | 0.919 | 23.78  | 20 | 20 | 7.55E-10 | 0.836  | 0.961 | v6.0          | KKI |
| RH_caudalanteriorcingulate_thickavg | ICC2 | 0.688 | 14.74  | 20 | 20 | 5.80E-08 | 0.015  | 0.885 | v6.0 vs. v7.1 | KKI |
| RH_caudalanteriorcingulate_thickavg | ICC3 | 0.887 | 16.76  | 20 | 20 | 1.85E-08 | 0.775  | 0.945 | v7.1          | KKI |
| RH_caudalmiddlefrontal_surfavg      | ICC3 | 0.977 | 85.43  | 20 | 20 | 3.61E-15 | 0.951  | 0.989 | v5.3          | KKI |
| RH_caudalmiddlefrontal_surfavg      | ICC2 | 0.801 | 8.77   | 20 | 20 | 4.87E-06 | 0.620  | 0.901 | v5.3 vs. v6.0 | KKI |
| RH_caudalmiddlefrontal_surfavg      | ICC2 | 0.746 | 6.70   | 20 | 20 | 4.09E-05 | 0.529  | 0.872 | v5.3 vs. v7.1 | KKI |
| RH_caudalmiddlefrontal_surfavg      | ICC3 | 0.906 | 20.20  | 20 | 20 | 3.40E-09 | 0.810  | 0.954 | v6.0          | KKI |
| RH_caudalmiddlefrontal_surfavg      | ICC2 | 0.976 | 80.15  | 20 | 20 | 6.74E-15 | 0.950  | 0.989 | v6.0 vs. v7.1 | KKI |
| RH_caudalmiddlefrontal_surfavg      | ICC3 | 0.987 | 152.48 | 20 | 20 | 1.21E-17 | 0.973  | 0.994 | v7.1          | KKI |
| RH_caudalmiddlefrontal_thickavg     | ICC3 | 0.772 | 7.79   | 20 | 20 | 1.26E-05 | 0.572  | 0.886 | v5.3          | KKI |
| RH_caudalmiddlefrontal_thickavg     | ICC2 | 0.857 | 24.46  | 20 | 20 | 5.82E-10 | 0.443  | 0.947 | v5.3 vs. v6.0 | KKI |
| RH_caudalmiddlefrontal_thickavg     | ICC2 | 0.835 | 18.02  | 20 | 20 | 9.59E-09 | 0.493  | 0.933 | v5.3 vs. v7.1 | KKI |
| RH_caudalmiddlefrontal_thickavg     | ICC3 | 0.866 | 13.89  | 20 | 20 | 9.79E-08 | 0.735  | 0.934 | v6.0          | KKI |
| RH_caudalmiddlefrontal_thickavg     | ICC2 | 0.933 | 27.52  | 20 | 20 | 1.94E-10 | 0.862  | 0.968 | v6.0 vs. v7.1 | KKI |
| RH_caudalmiddlefrontal_thickavg     | ICC3 | 0.836 | 11.17  | 20 | 20 | 6.45E-07 | 0.680  | 0.919 | v7.1          | KKI |
| RH_Caudate                          | ICC3 | 0.982 | 110.30 | 20 | 20 | 2.94E-16 | 0.962  | 0.991 | v5.3          | KKI |
| RH_Caudate                          | ICC2 | 0.823 | 274.64 | 20 | 20 | 3.54E-20 | 0.010  | 0.952 | v5.3 vs. v6.0 | KKI |
| RH_Caudate                          | ICC2 | 0.906 | 183.74 | 20 | 20 | 1.91E-18 | 0.053  | 0.975 | v5.3 vs. v7.1 | KKI |
| RH_Caudate                          | ICC3 | 0.993 | 276.45 | 20 | 20 | 3.32E-20 | 0.985  | 0.997 | v6.0          | KKI |
| RH_Caudate                          | ICC2 | 0.970 | 292.06 | 20 | 20 | 1.92E-20 | 0.444  | 0.992 | v6.0 vs. v7.1 | KKI |
| RH_Caudate                          | ICC3 | 0.989 | 186.03 | 20 | 20 | 1.69E-18 | 0.977  | 0.995 | v7.1          | KKI |
| RH_cuneus_surfavg                   | ICC3 | 0.946 | 35.71  | 20 | 20 | 1.66E-11 | 0.888  | 0.974 | v5.3          | KKI |
| RH_cuneus_surfavg                   | ICC2 | 0.763 | 9.74   | 20 | 20 | 2.05E-06 | 0.482  | 0.889 | v5.3 vs. v6.0 | KKI |
| RH_cuneus_surfavg                   | ICC2 | 0.713 | 9.81   | 20 | 20 | 1.93E-06 | 0.264  | 0.877 | v5.3 vs. v7.1 | KKI |

|                         |      |       |        |    |    |          |        |       |               |     |
|-------------------------|------|-------|--------|----|----|----------|--------|-------|---------------|-----|
| RH_cuneus_surfavg       | ICC3 | 0.982 | 108.17 | 20 | 20 | 3.56E-16 | 0.961  | 0.991 | v6.0          | KKI |
| RH_cuneus_surfavg       | ICC2 | 0.966 | 80.64  | 20 | 20 | 6.35E-15 | 0.899  | 0.986 | v6.0 vs. v7.1 | KKI |
| RH_cuneus_surfavg       | ICC3 | 0.982 | 108.40 | 20 | 20 | 3.49E-16 | 0.962  | 0.991 | v7.1          | KKI |
| RH_cuneus_thickavg      | ICC3 | 0.947 | 36.83  | 20 | 20 | 1.24E-11 | 0.891  | 0.975 | v5.3          | KKI |
| RH_cuneus_thickavg      | ICC2 | 0.796 | 71.36  | 20 | 20 | 2.09E-14 | -0.005 | 0.940 | v5.3 vs. v6.0 | KKI |
| RH_cuneus_thickavg      | ICC2 | 0.792 | 18.41  | 20 | 20 | 7.92E-09 | 0.225  | 0.923 | v5.3 vs. v7.1 | KKI |
| RH_cuneus_thickavg      | ICC3 | 0.951 | 39.91  | 20 | 20 | 5.75E-12 | 0.899  | 0.977 | v6.0          | KKI |
| RH_cuneus_thickavg      | ICC2 | 0.935 | 36.96  | 20 | 20 | 1.20E-11 | 0.847  | 0.971 | v6.0 vs. v7.1 | KKI |
| RH_cuneus_thickavg      | ICC3 | 0.934 | 29.41  | 20 | 20 | 1.04E-10 | 0.865  | 0.968 | v7.1          | KKI |
| RH_entorhinal_surfavg   | ICC3 | 0.772 | 7.78   | 20 | 20 | 1.27E-05 | 0.571  | 0.886 | v5.3          | KKI |
| RH_entorhinal_surfavg   | ICC2 | 0.555 | 15.37  | 20 | 20 | 4.00E-08 | -0.050 | 0.830 | v5.3 vs. v6.0 | KKI |
| RH_entorhinal_surfavg   | ICC2 | 0.500 | 10.37  | 20 | 20 | 1.21E-06 | -0.059 | 0.792 | v5.3 vs. v7.1 | KKI |
| RH_entorhinal_surfavg   | ICC3 | 0.913 | 21.93  | 20 | 20 | 1.60E-09 | 0.823  | 0.958 | v6.0          | KKI |
| RH_entorhinal_surfavg   | ICC2 | 0.870 | 14.30  | 20 | 20 | 7.57E-08 | 0.745  | 0.936 | v6.0 vs. v7.1 | KKI |
| RH_entorhinal_surfavg   | ICC3 | 0.893 | 17.76  | 20 | 20 | 1.09E-08 | 0.786  | 0.948 | v7.1          | KKI |
| RH_entorhinal_thickavg  | ICC3 | 0.659 | 4.87   | 20 | 20 | 4.21E-04 | 0.393  | 0.824 | v5.3          | KKI |
| RH_entorhinal_thickavg  | ICC2 | 0.835 | 12.54  | 20 | 20 | 2.39E-07 | 0.668  | 0.920 | v5.3 vs. v6.0 | KKI |
| RH_entorhinal_thickavg  | ICC2 | 0.578 | 7.41   | 20 | 20 | 1.88E-05 | 0.027  | 0.816 | v5.3 vs. v7.1 | KKI |
| RH_entorhinal_thickavg  | ICC3 | 0.797 | 8.83   | 20 | 20 | 4.59E-06 | 0.612  | 0.899 | v6.0          | KKI |
| RH_entorhinal_thickavg  | ICC2 | 0.755 | 11.55  | 20 | 20 | 4.85E-07 | 0.341  | 0.896 | v6.0 vs. v7.1 | KKI |
| RH_entorhinal_thickavg  | ICC3 | 0.661 | 4.89   | 20 | 20 | 4.08E-04 | 0.395  | 0.825 | v7.1          | KKI |
| RH_frontalpole_surfavg  | ICC3 | 0.551 | 3.45   | 20 | 20 | 3.94E-03 | 0.238  | 0.760 | v5.3          | KKI |
| RH_frontalpole_surfavg  | ICC2 | 0.341 | 2.76   | 20 | 20 | 1.40E-02 | -0.008 | 0.619 | v5.3 vs. v6.0 | KKI |
| RH_frontalpole_surfavg  | ICC2 | 0.208 | 3.54   | 20 | 20 | 3.38E-03 | -0.067 | 0.510 | v5.3 vs. v7.1 | KKI |
| RH_frontalpole_surfavg  | ICC3 | 0.847 | 12.05  | 20 | 20 | 3.37E-07 | 0.700  | 0.925 | v6.0          | KKI |
| RH_frontalpole_surfavg  | ICC2 | 0.445 | 6.45   | 20 | 20 | 5.45E-05 | -0.062 | 0.744 | v6.0 vs. v7.1 | KKI |
| RH_frontalpole_surfavg  | ICC3 | 0.855 | 12.81  | 20 | 20 | 1.99E-07 | 0.716  | 0.929 | v7.1          | KKI |
| RH_frontalpole_thickavg | ICC3 | 0.784 | 8.26   | 20 | 20 | 7.85E-06 | 0.591  | 0.892 | v5.3          | KKI |
| RH_frontalpole_thickavg | ICC2 | 0.856 | 16.63  | 20 | 20 | 1.98E-08 | 0.660  | 0.935 | v5.3 vs. v6.0 | KKI |
| RH_frontalpole_thickavg | ICC2 | 0.829 | 14.83  | 20 | 20 | 5.51E-08 | 0.574  | 0.925 | v5.3 vs. v7.1 | KKI |
| RH_frontalpole_thickavg | ICC3 | 0.830 | 10.77  | 20 | 20 | 8.81E-07 | 0.670  | 0.916 | v6.0          | KKI |
| RH_frontalpole_thickavg | ICC2 | 0.890 | 16.90  | 20 | 20 | 1.71E-08 | 0.782  | 0.947 | v6.0 vs. v7.1 | KKI |
| RH_frontalpole_thickavg | ICC3 | 0.840 | 11.46  | 20 | 20 | 5.18E-07 | 0.687  | 0.921 | v7.1          | KKI |
| RH_fusiform_surfavg     | ICC3 | 0.967 | 59.49  | 20 | 20 | 1.23E-13 | 0.931  | 0.984 | v5.3          | KKI |
| RH_fusiform_surfavg     | ICC2 | 0.868 | 23.62  | 20 | 20 | 8.05E-10 | 0.549  | 0.948 | v5.3 vs. v6.0 | KKI |
| RH_fusiform_surfavg     | ICC2 | 0.883 | 23.52  | 20 | 20 | 8.36E-10 | 0.661  | 0.951 | v5.3 vs. v7.1 | KKI |
| RH_fusiform_surfavg     | ICC3 | 0.987 | 147.97 | 20 | 20 | 1.62E-17 | 0.972  | 0.994 | v6.0          | KKI |
| RH_fusiform_surfavg     | ICC2 | 0.989 | 191.05 | 20 | 20 | 1.30E-18 | 0.976  | 0.995 | v6.0 vs. v7.1 | KKI |
| RH_fusiform_surfavg     | ICC3 | 0.987 | 152.10 | 20 | 20 | 1.24E-17 | 0.972  | 0.994 | v7.1          | KKI |
| RH_fusiform_thickavg    | ICC3 | 0.902 | 19.48  | 20 | 20 | 4.73E-09 | 0.803  | 0.953 | v5.3          | KKI |
| RH_fusiform_thickavg    | ICC2 | 0.929 | 26.20  | 20 | 20 | 3.07E-10 | 0.856  | 0.966 | v5.3 vs. v6.0 | KKI |
| RH_fusiform_thickavg    | ICC2 | 0.785 | 13.51  | 20 | 20 | 1.25E-07 | 0.386  | 0.911 | v5.3 vs. v7.1 | KKI |
| RH_fusiform_thickavg    | ICC3 | 0.920 | 24.03  | 20 | 20 | 6.86E-10 | 0.838  | 0.962 | v6.0          | KKI |
| RH_fusiform_thickavg    | ICC2 | 0.819 | 19.73  | 20 | 20 | 4.20E-09 | 0.326  | 0.932 | v6.0 vs. v7.1 | KKI |

|                              |      |       |        |    |    |          |        |       |               |     |
|------------------------------|------|-------|--------|----|----|----------|--------|-------|---------------|-----|
| RH_fusiform_thickavg         | ICC3 | 0.873 | 14.80  | 20 | 20 | 5.61E-08 | 0.749  | 0.938 | v7.1          | KKI |
| RH_Hippocampus               | ICC3 | 0.963 | 53.19  | 20 | 20 | 3.63E-13 | 0.923  | 0.982 | v5.3          | KKI |
| RH_Hippocampus               | ICC2 | 0.780 | 28.56  | 20 | 20 | 1.37E-10 | 0.031  | 0.929 | v5.3 vs. v6.0 | KKI |
| RH_Hippocampus               | ICC2 | 0.863 | 63.16  | 20 | 20 | 6.88E-14 | 0.063  | 0.960 | v5.3 vs. v7.1 | KKI |
| RH_Hippocampus               | ICC3 | 0.944 | 34.88  | 20 | 20 | 2.07E-11 | 0.885  | 0.973 | v6.0          | KKI |
| RH_Hippocampus               | ICC2 | 0.945 | 38.70  | 20 | 20 | 7.72E-12 | 0.885  | 0.974 | v6.0 vs. v7.1 | KKI |
| RH_Hippocampus               | ICC3 | 0.952 | 40.28  | 20 | 20 | 5.26E-12 | 0.900  | 0.977 | v7.1          | KKI |
| RH_inferiorparietal_surfavg  | ICC3 | 0.877 | 15.27  | 20 | 20 | 4.23E-08 | 0.756  | 0.940 | v5.3          | KKI |
| RH_inferiorparietal_surfavg  | ICC2 | 0.839 | 15.46  | 20 | 20 | 3.79E-08 | 0.606  | 0.928 | v5.3 vs. v6.0 | KKI |
| RH_inferiorparietal_surfavg  | ICC2 | 0.848 | 12.75  | 20 | 20 | 2.06E-07 | 0.704  | 0.925 | v5.3 vs. v7.1 | KKI |
| RH_inferiorparietal_surfavg  | ICC3 | 0.990 | 190.62 | 20 | 20 | 1.33E-18 | 0.978  | 0.995 | v6.0          | KKI |
| RH_inferiorparietal_surfavg  | ICC2 | 0.974 | 109.52 | 20 | 20 | 3.15E-16 | 0.920  | 0.990 | v6.0 vs. v7.1 | KKI |
| RH_inferiorparietal_surfavg  | ICC3 | 0.985 | 136.08 | 20 | 20 | 3.71E-17 | 0.969  | 0.993 | v7.1          | KKI |
| RH_inferiorparietal_thickavg | ICC3 | 0.739 | 6.67   | 20 | 20 | 4.21E-05 | 0.517  | 0.868 | v5.3          | KKI |
| RH_inferiorparietal_thickavg | ICC2 | 0.698 | 8.60   | 20 | 20 | 5.72E-06 | 0.285  | 0.865 | v5.3 vs. v6.0 | KKI |
| RH_inferiorparietal_thickavg | ICC2 | 0.809 | 11.75  | 20 | 20 | 4.20E-07 | 0.592  | 0.910 | v5.3 vs. v7.1 | KKI |
| RH_inferiorparietal_thickavg | ICC3 | 0.730 | 6.42   | 20 | 20 | 5.67E-05 | 0.503  | 0.863 | v6.0          | KKI |
| RH_inferiorparietal_thickavg | ICC2 | 0.892 | 24.16  | 20 | 20 | 6.53E-10 | 0.709  | 0.953 | v6.0 vs. v7.1 | KKI |
| RH_inferiorparietal_thickavg | ICC3 | 0.671 | 5.07   | 20 | 20 | 3.17E-04 | 0.410  | 0.830 | v7.1          | KKI |
| RH_inferiortemporal_surfavg  | ICC3 | 0.975 | 78.61  | 20 | 20 | 8.15E-15 | 0.947  | 0.988 | v5.3          | KKI |
| RH_inferiortemporal_surfavg  | ICC2 | 0.915 | 56.94  | 20 | 20 | 1.88E-13 | 0.428  | 0.973 | v5.3 vs. v6.0 | KKI |
| RH_inferiortemporal_surfavg  | ICC2 | 0.866 | 63.62  | 20 | 20 | 6.41E-14 | 0.070  | 0.961 | v5.3 vs. v7.1 | KKI |
| RH_inferiortemporal_surfavg  | ICC3 | 0.988 | 169.28 | 20 | 20 | 4.30E-18 | 0.975  | 0.994 | v6.0          | KKI |
| RH_inferiortemporal_surfavg  | ICC2 | 0.977 | 132.20 | 20 | 20 | 4.94E-17 | 0.912  | 0.991 | v6.0 vs. v7.1 | KKI |
| RH_inferiortemporal_surfavg  | ICC3 | 0.991 | 228.77 | 20 | 20 | 2.17E-19 | 0.982  | 0.996 | v7.1          | KKI |
| RH_inferiortemporal_thickavg | ICC3 | 0.909 | 20.92  | 20 | 20 | 2.46E-09 | 0.816  | 0.956 | v5.3          | KKI |
| RH_inferiortemporal_thickavg | ICC2 | 0.900 | 18.83  | 20 | 20 | 6.44E-09 | 0.800  | 0.951 | v5.3 vs. v6.0 | KKI |
| RH_inferiortemporal_thickavg | ICC2 | 0.860 | 16.14  | 20 | 20 | 2.59E-08 | 0.696  | 0.935 | v5.3 vs. v7.1 | KKI |
| RH_inferiortemporal_thickavg | ICC3 | 0.903 | 19.62  | 20 | 20 | 4.43E-09 | 0.805  | 0.953 | v6.0          | KKI |
| RH_inferiortemporal_thickavg | ICC2 | 0.936 | 38.06  | 20 | 20 | 9.05E-12 | 0.846  | 0.972 | v6.0 vs. v7.1 | KKI |
| RH_inferiortemporal_thickavg | ICC3 | 0.932 | 28.48  | 20 | 20 | 1.41E-10 | 0.861  | 0.967 | v7.1          | KKI |
| RH_insula_surfavg            | ICC3 | 0.913 | 21.90  | 20 | 20 | 1.62E-09 | 0.823  | 0.958 | v5.3          | KKI |
| RH_insula_surfavg            | ICC2 | 0.513 | 8.88   | 20 | 20 | 4.38E-06 | -0.056 | 0.794 | v5.3 vs. v6.0 | KKI |
| RH_insula_surfavg            | ICC2 | 0.453 | 6.73   | 20 | 20 | 3.95E-05 | -0.062 | 0.750 | v5.3 vs. v7.1 | KKI |
| RH_insula_surfavg            | ICC3 | 0.817 | 9.93   | 20 | 20 | 1.74E-06 | 0.648  | 0.910 | v6.0          | KKI |
| RH_insula_surfavg            | ICC2 | 0.858 | 13.32  | 20 | 20 | 1.41E-07 | 0.724  | 0.930 | v6.0 vs. v7.1 | KKI |
| RH_insula_surfavg            | ICC3 | 0.823 | 10.32  | 20 | 20 | 1.26E-06 | 0.659  | 0.913 | v7.1          | KKI |
| RH_insula_thickavg           | ICC3 | 0.903 | 19.71  | 20 | 20 | 4.26E-09 | 0.805  | 0.953 | v5.3          | KKI |
| RH_insula_thickavg           | ICC2 | 0.894 | 17.08  | 20 | 20 | 1.55E-08 | 0.787  | 0.949 | v5.3 vs. v6.0 | KKI |
| RH_insula_thickavg           | ICC2 | 0.798 | 18.57  | 20 | 20 | 7.30E-09 | 0.250  | 0.925 | v5.3 vs. v7.1 | KKI |
| RH_insula_thickavg           | ICC3 | 0.853 | 12.65  | 20 | 20 | 2.22E-07 | 0.712  | 0.928 | v6.0          | KKI |
| RH_insula_thickavg           | ICC2 | 0.792 | 19.48  | 20 | 20 | 4.72E-09 | 0.193  | 0.925 | v6.0 vs. v7.1 | KKI |
| RH_insula_thickavg           | ICC3 | 0.869 | 14.23  | 20 | 20 | 7.92E-08 | 0.740  | 0.936 | v7.1          | KKI |
| RH_isthmuscingulate_surfavg  | ICC3 | 0.933 | 28.86  | 20 | 20 | 1.24E-10 | 0.863  | 0.968 | v5.3          | KKI |

|                                  |      |       |         |    |    |          |        |       |               |     |
|----------------------------------|------|-------|---------|----|----|----------|--------|-------|---------------|-----|
| RH_isthmuscingulate_surfavg      | ICC2 | 0.899 | 18.22   | 20 | 20 | 8.71E-09 | 0.798  | 0.951 | v5.3 vs. v6.0 | KKI |
| RH_isthmuscingulate_surfavg      | ICC2 | 0.884 | 17.17   | 20 | 20 | 1.49E-08 | 0.769  | 0.943 | v5.3 vs. v7.1 | KKI |
| RH_isthmuscingulate_surfavg      | ICC3 | 0.977 | 84.85   | 20 | 20 | 3.86E-15 | 0.951  | 0.989 | v6.0          | KKI |
| RH_isthmuscingulate_surfavg      | ICC2 | 0.972 | 90.11   | 20 | 20 | 2.14E-15 | 0.930  | 0.988 | v6.0 vs. v7.1 | KKI |
| RH_isthmuscingulate_surfavg      | ICC3 | 0.972 | 70.16   | 20 | 20 | 2.47E-14 | 0.941  | 0.987 | v7.1          | KKI |
| RH_isthmuscingulate_thickavg     | ICC3 | 0.791 | 8.57    | 20 | 20 | 5.84E-06 | 0.603  | 0.896 | v5.3          | KKI |
| RH_isthmuscingulate_thickavg     | ICC2 | 0.885 | 16.54   | 20 | 20 | 2.08E-08 | 0.774  | 0.944 | v5.3 vs. v6.0 | KKI |
| RH_isthmuscingulate_thickavg     | ICC2 | 0.614 | 6.91    | 20 | 20 | 3.23E-05 | 0.137  | 0.825 | v5.3 vs. v7.1 | KKI |
| RH_isthmuscingulate_thickavg     | ICC3 | 0.886 | 16.47   | 20 | 20 | 2.16E-08 | 0.772  | 0.944 | v6.0          | KKI |
| RH_isthmuscingulate_thickavg     | ICC2 | 0.771 | 13.54   | 20 | 20 | 1.23E-07 | 0.314  | 0.908 | v6.0 vs. v7.1 | KKI |
| RH_isthmuscingulate_thickavg     | ICC3 | 0.883 | 16.10   | 20 | 20 | 2.64E-08 | 0.767  | 0.943 | v7.1          | KKI |
| RH_lateraloccipital_surfavg      | ICC3 | 0.954 | 42.33   | 20 | 20 | 3.27E-12 | 0.904  | 0.978 | v5.3          | KKI |
| RH_lateraloccipital_surfavg      | ICC2 | 0.849 | 53.32   | 20 | 20 | 3.55E-13 | 0.059  | 0.955 | v5.3 vs. v6.0 | KKI |
| RH_lateraloccipital_surfavg      | ICC2 | 0.827 | 49.42   | 20 | 20 | 7.39E-13 | 0.029  | 0.948 | v5.3 vs. v7.1 | KKI |
| RH_lateraloccipital_surfavg      | ICC3 | 0.994 | 343.74  | 20 | 20 | 3.80E-21 | 0.988  | 0.997 | v6.0          | KKI |
| RH_lateraloccipital_surfavg      | ICC2 | 0.992 | 286.10  | 20 | 20 | 2.36E-20 | 0.981  | 0.996 | v6.0 vs. v7.1 | KKI |
| RH_lateraloccipital_surfavg      | ICC3 | 0.992 | 257.13  | 20 | 20 | 6.81E-20 | 0.984  | 0.996 | v7.1          | KKI |
| RH_lateraloccipital_thickavg     | ICC3 | 0.900 | 19.06   | 20 | 20 | 5.76E-09 | 0.799  | 0.952 | v5.3          | KKI |
| RH_lateraloccipital_thickavg     | ICC2 | 0.749 | 31.28   | 20 | 20 | 5.82E-11 | -0.012 | 0.919 | v5.3 vs. v6.0 | KKI |
| RH_lateraloccipital_thickavg     | ICC2 | 0.753 | 23.70   | 20 | 20 | 7.80E-10 | 0.019  | 0.917 | v5.3 vs. v7.1 | KKI |
| RH_lateraloccipital_thickavg     | ICC3 | 0.934 | 29.43   | 20 | 20 | 1.03E-10 | 0.865  | 0.969 | v6.0          | KKI |
| RH_lateraloccipital_thickavg     | ICC2 | 0.953 | 41.71   | 20 | 20 | 3.77E-12 | 0.903  | 0.977 | v6.0 vs. v7.1 | KKI |
| RH_lateraloccipital_thickavg     | ICC3 | 0.915 | 22.49   | 20 | 20 | 1.27E-09 | 0.827  | 0.959 | v7.1          | KKI |
| RH_lateralorbitofrontal_surfavg  | ICC3 | 0.947 | 36.55   | 20 | 20 | 1.33E-11 | 0.890  | 0.975 | v5.3          | KKI |
| RH_lateralorbitofrontal_surfavg  | ICC2 | 0.878 | 64.60   | 20 | 20 | 5.52E-14 | 0.105  | 0.964 | v5.3 vs. v6.0 | KKI |
| RH_lateralorbitofrontal_surfavg  | ICC2 | 0.758 | 24.85   | 20 | 20 | 5.02E-10 | 0.019  | 0.919 | v5.3 vs. v7.1 | KKI |
| RH_lateralorbitofrontal_surfavg  | ICC3 | 0.954 | 42.66   | 20 | 20 | 3.04E-12 | 0.905  | 0.978 | v6.0          | KKI |
| RH_lateralorbitofrontal_surfavg  | ICC2 | 0.923 | 30.63   | 20 | 20 | 7.09E-11 | 0.820  | 0.965 | v6.0 vs. v7.1 | KKI |
| RH_lateralorbitofrontal_surfavg  | ICC3 | 0.886 | 16.47   | 20 | 20 | 2.16E-08 | 0.772  | 0.944 | v7.1          | KKI |
| RH_lateralorbitofrontal_thickavg | ICC3 | 0.870 | 14.38   | 20 | 20 | 7.21E-08 | 0.743  | 0.937 | v5.3          | KKI |
| RH_lateralorbitofrontal_thickavg | ICC2 | 0.823 | 10.06   | 20 | 20 | 1.56E-06 | 0.660  | 0.912 | v5.3 vs. v6.0 | KKI |
| RH_lateralorbitofrontal_thickavg | ICC2 | 0.805 | 12.01   | 20 | 20 | 3.46E-07 | 0.564  | 0.910 | v5.3 vs. v7.1 | KKI |
| RH_lateralorbitofrontal_thickavg | ICC3 | 0.839 | 11.44   | 20 | 20 | 5.26E-07 | 0.687  | 0.921 | v6.0          | KKI |
| RH_lateralorbitofrontal_thickavg | ICC2 | 0.862 | 17.45   | 20 | 20 | 1.28E-08 | 0.674  | 0.938 | v6.0 vs. v7.1 | KKI |
| RH_lateralorbitofrontal_thickavg | ICC3 | 0.799 | 8.95    | 20 | 20 | 4.11E-06 | 0.616  | 0.900 | v7.1          | KKI |
| RH_LateralVentricle              | ICC3 | 1.000 | 4340.66 | 20 | 20 | 3.87E-32 | 0.999  | 1.000 | v5.3          | KKI |
| RH_LateralVentricle              | ICC2 | 0.995 | 1692.71 | 20 | 20 | 4.73E-28 | 0.860  | 0.999 | v5.3 vs. v6.0 | KKI |
| RH_LateralVentricle              | ICC2 | 0.994 | 1967.91 | 20 | 20 | 1.05E-28 | 0.730  | 0.998 | v5.3 vs. v7.1 | KKI |
| RH_LateralVentricle              | ICC3 | 0.999 | 2808.31 | 20 | 20 | 3.01E-30 | 0.998  | 1.000 | v6.0          | KKI |
| RH_LateralVentricle              | ICC2 | 1.000 | 6103.36 | 20 | 20 | 1.28E-33 | 0.999  | 1.000 | v6.0 vs. v7.1 | KKI |
| RH_LateralVentricle              | ICC3 | 1.000 | 7004.17 | 20 | 20 | 3.24E-34 | 0.999  | 1.000 | v7.1          | KKI |
| RH_lingual_surfavg               | ICC3 | 0.967 | 58.76   | 20 | 20 | 1.38E-13 | 0.930  | 0.984 | v5.3          | KKI |
| RH_lingual_surfavg               | ICC2 | 0.881 | 18.75   | 20 | 20 | 6.69E-09 | 0.743  | 0.944 | v5.3 vs. v6.0 | KKI |
| RH_lingual_surfavg               | ICC2 | 0.860 | 18.93   | 20 | 20 | 6.13E-09 | 0.626  | 0.940 | v5.3 vs. v7.1 | KKI |

|                                 |      |       |        |    |    |          |        |       |               |     |
|---------------------------------|------|-------|--------|----|----|----------|--------|-------|---------------|-----|
| RH_lingual_surfavg              | ICC3 | 0.986 | 137.01 | 20 | 20 | 3.47E-17 | 0.969  | 0.993 | v6.0          | KKI |
| RH_lingual_surfavg              | ICC2 | 0.990 | 287.72 | 20 | 20 | 2.23E-20 | 0.966  | 0.996 | v6.0 vs. v7.1 | KKI |
| RH_lingual_surfavg              | ICC3 | 0.989 | 183.96 | 20 | 20 | 1.89E-18 | 0.977  | 0.995 | v7.1          | KKI |
| RH_lingual_thickavg             | ICC3 | 0.941 | 32.67  | 20 | 20 | 3.85E-11 | 0.878  | 0.972 | v5.3          | KKI |
| RH_lingual_thickavg             | ICC2 | 0.885 | 26.35  | 20 | 20 | 2.91E-10 | 0.613  | 0.954 | v5.3 vs. v6.0 | KKI |
| RH_lingual_thickavg             | ICC2 | 0.936 | 28.76  | 20 | 20 | 1.28E-10 | 0.868  | 0.969 | v5.3 vs. v7.1 | KKI |
| RH_lingual_thickavg             | ICC3 | 0.897 | 18.48  | 20 | 20 | 7.62E-09 | 0.794  | 0.950 | v6.0          | KKI |
| RH_lingual_thickavg             | ICC2 | 0.916 | 79.71  | 20 | 20 | 7.11E-15 | 0.253  | 0.975 | v6.0 vs. v7.1 | KKI |
| RH_lingual_thickavg             | ICC3 | 0.910 | 21.30  | 20 | 20 | 2.09E-09 | 0.819  | 0.957 | v7.1          | KKI |
| RH_medialorbitofrontal_surfavg  | ICC3 | 0.862 | 13.45  | 20 | 20 | 1.30E-07 | 0.727  | 0.932 | v5.3          | KKI |
| RH_medialorbitofrontal_surfavg  | ICC2 | 0.552 | 10.36  | 20 | 20 | 1.22E-06 | -0.050 | 0.819 | v5.3 vs. v6.0 | KKI |
| RH_medialorbitofrontal_surfavg  | ICC2 | 0.262 | 5.84   | 20 | 20 | 1.15E-04 | -0.056 | 0.589 | v5.3 vs. v7.1 | KKI |
| RH_medialorbitofrontal_surfavg  | ICC3 | 0.918 | 23.29  | 20 | 20 | 9.18E-10 | 0.833  | 0.960 | v6.0          | KKI |
| RH_medialorbitofrontal_surfavg  | ICC2 | 0.639 | 15.64  | 20 | 20 | 3.42E-08 | -0.035 | 0.868 | v6.0 vs. v7.1 | KKI |
| RH_medialorbitofrontal_surfavg  | ICC3 | 0.929 | 27.28  | 20 | 20 | 2.10E-10 | 0.856  | 0.966 | v7.1          | KKI |
| RH_medialorbitofrontal_thickavg | ICC3 | 0.868 | 14.18  | 20 | 20 | 8.15E-08 | 0.739  | 0.936 | v5.3          | KKI |
| RH_medialorbitofrontal_thickavg | ICC2 | 0.823 | 9.85   | 20 | 20 | 1.86E-06 | 0.656  | 0.913 | v5.3 vs. v6.0 | KKI |
| RH_medialorbitofrontal_thickavg | ICC2 | 0.706 | 10.50  | 20 | 20 | 1.09E-06 | 0.195  | 0.878 | v5.3 vs. v7.1 | KKI |
| RH_medialorbitofrontal_thickavg | ICC3 | 0.859 | 13.14  | 20 | 20 | 1.59E-07 | 0.722  | 0.931 | v6.0          | KKI |
| RH_medialorbitofrontal_thickavg | ICC2 | 0.709 | 12.05  | 20 | 20 | 3.38E-07 | 0.130  | 0.885 | v6.0 vs. v7.1 | KKI |
| RH_medialorbitofrontal_thickavg | ICC3 | 0.882 | 15.99  | 20 | 20 | 2.81E-08 | 0.766  | 0.943 | v7.1          | KKI |
| RH_middletemporal_surfavg       | ICC3 | 0.977 | 84.70  | 20 | 20 | 3.93E-15 | 0.951  | 0.989 | v5.3          | KKI |
| RH_middletemporal_surfavg       | ICC2 | 0.922 | 44.69  | 20 | 20 | 1.95E-12 | 0.658  | 0.971 | v5.3 vs. v6.0 | KKI |
| RH_middletemporal_surfavg       | ICC2 | 0.889 | 66.19  | 20 | 20 | 4.36E-14 | 0.145  | 0.967 | v5.3 vs. v7.1 | KKI |
| RH_middletemporal_surfavg       | ICC3 | 0.985 | 136.80 | 20 | 20 | 3.53E-17 | 0.969  | 0.993 | v6.0          | KKI |
| RH_middletemporal_surfavg       | ICC2 | 0.977 | 163.64 | 20 | 20 | 6.00E-18 | 0.862  | 0.992 | v6.0 vs. v7.1 | KKI |
| RH_middletemporal_surfavg       | ICC3 | 0.995 | 402.52 | 20 | 20 | 7.91E-22 | 0.990  | 0.998 | v7.1          | KKI |
| RH_middletemporal_thickavg      | ICC3 | 0.927 | 26.40  | 20 | 20 | 2.86E-10 | 0.851  | 0.965 | v5.3          | KKI |
| RH_middletemporal_thickavg      | ICC2 | 0.900 | 26.89  | 20 | 20 | 2.41E-10 | 0.717  | 0.958 | v5.3 vs. v6.0 | KKI |
| RH_middletemporal_thickavg      | ICC2 | 0.742 | 18.66  | 20 | 20 | 6.99E-09 | 0.053  | 0.909 | v5.3 vs. v7.1 | KKI |
| RH_middletemporal_thickavg      | ICC3 | 0.922 | 24.62  | 20 | 20 | 5.47E-10 | 0.841  | 0.962 | v6.0          | KKI |
| RH_middletemporal_thickavg      | ICC2 | 0.872 | 37.55  | 20 | 20 | 1.03E-11 | 0.284  | 0.958 | v6.0 vs. v7.1 | KKI |
| RH_middletemporal_thickavg      | ICC3 | 0.942 | 33.29  | 20 | 20 | 3.23E-11 | 0.880  | 0.972 | v7.1          | KKI |
| RH_Pallidum                     | ICC3 | 0.869 | 14.29  | 20 | 20 | 7.62E-08 | 0.741  | 0.936 | v5.3          | KKI |
| RH_Pallidum                     | ICC2 | 0.306 | 4.69   | 20 | 20 | 5.51E-04 | -0.072 | 0.627 | v5.3 vs. v6.0 | KKI |
| RH_Pallidum                     | ICC2 | 0.307 | 4.42   | 20 | 20 | 8.14E-04 | -0.073 | 0.625 | v5.3 vs. v7.1 | KKI |
| RH_Pallidum                     | ICC3 | 0.915 | 22.44  | 20 | 20 | 1.29E-09 | 0.827  | 0.959 | v6.0          | KKI |
| RH_Pallidum                     | ICC2 | 0.865 | 13.56  | 20 | 20 | 1.21E-07 | 0.736  | 0.934 | v6.0 vs. v7.1 | KKI |
| RH_Pallidum                     | ICC3 | 0.908 | 20.69  | 20 | 20 | 2.72E-09 | 0.814  | 0.956 | v7.1          | KKI |
| RH_paracentral_surfavg          | ICC3 | 0.943 | 34.38  | 20 | 20 | 2.38E-11 | 0.884  | 0.973 | v5.3          | KKI |
| RH_paracentral_surfavg          | ICC2 | 0.777 | 8.01   | 20 | 20 | 1.01E-05 | 0.583  | 0.888 | v5.3 vs. v6.0 | KKI |
| RH_paracentral_surfavg          | ICC2 | 0.783 | 8.51   | 20 | 20 | 6.19E-06 | 0.593  | 0.891 | v5.3 vs. v7.1 | KKI |
| RH_paracentral_surfavg          | ICC3 | 0.968 | 61.10  | 20 | 20 | 9.48E-14 | 0.933  | 0.985 | v6.0          | KKI |
| RH_paracentral_surfavg          | ICC2 | 0.984 | 122.50 | 20 | 20 | 1.05E-16 | 0.966  | 0.992 | v6.0 vs. v7.1 | KKI |

|                              |      |       |        |    |    |          |        |       |               |     |
|------------------------------|------|-------|--------|----|----|----------|--------|-------|---------------|-----|
| RH_paracentral_surfavg       | ICC3 | 0.962 | 51.97  | 20 | 20 | 4.54E-13 | 0.921  | 0.982 | v7.1          | KKI |
| RH_paracentral_thickavg      | ICC3 | 0.862 | 13.46  | 20 | 20 | 1.29E-07 | 0.727  | 0.932 | v5.3          | KKI |
| RH_paracentral_thickavg      | ICC2 | 0.782 | 15.68  | 20 | 20 | 3.35E-08 | 0.276  | 0.916 | v5.3 vs. v6.0 | KKI |
| RH_paracentral_thickavg      | ICC2 | 0.810 | 19.13  | 20 | 20 | 5.57E-09 | 0.296  | 0.929 | v5.3 vs. v7.1 | KKI |
| RH_paracentral_thickavg      | ICC3 | 0.892 | 17.60  | 20 | 20 | 1.19E-08 | 0.785  | 0.948 | v6.0          | KKI |
| RH_paracentral_thickavg      | ICC2 | 0.939 | 30.52  | 20 | 20 | 7.33E-11 | 0.875  | 0.971 | v6.0 vs. v7.1 | KKI |
| RH_paracentral_thickavg      | ICC3 | 0.903 | 19.56  | 20 | 20 | 4.56E-09 | 0.804  | 0.953 | v7.1          | KKI |
| RH_parahippocampal_surfavg   | ICC3 | 0.886 | 16.52  | 20 | 20 | 2.10E-08 | 0.772  | 0.945 | v5.3          | KKI |
| RH_parahippocampal_surfavg   | ICC2 | 0.630 | 6.67   | 20 | 20 | 4.22E-05 | 0.201  | 0.828 | v5.3 vs. v6.0 | KKI |
| RH_parahippocampal_surfavg   | ICC2 | 0.636 | 7.44   | 20 | 20 | 1.82E-05 | 0.160  | 0.837 | v5.3 vs. v7.1 | KKI |
| RH_parahippocampal_surfavg   | ICC3 | 0.824 | 10.33  | 20 | 20 | 1.25E-06 | 0.659  | 0.913 | v6.0          | KKI |
| RH_parahippocampal_surfavg   | ICC2 | 0.858 | 12.89  | 20 | 20 | 1.88E-07 | 0.723  | 0.930 | v6.0 vs. v7.1 | KKI |
| RH_parahippocampal_surfavg   | ICC3 | 0.847 | 12.10  | 20 | 20 | 3.25E-07 | 0.701  | 0.925 | v7.1          | KKI |
| RH_parahippocampal_thickavg  | ICC3 | 0.873 | 14.79  | 20 | 20 | 5.63E-08 | 0.749  | 0.938 | v5.3          | KKI |
| RH_parahippocampal_thickavg  | ICC2 | 0.899 | 17.94  | 20 | 20 | 9.98E-09 | 0.796  | 0.951 | v5.3 vs. v6.0 | KKI |
| RH_parahippocampal_thickavg  | ICC2 | 0.776 | 16.17  | 20 | 20 | 2.54E-08 | 0.226  | 0.915 | v5.3 vs. v7.1 | KKI |
| RH_parahippocampal_thickavg  | ICC3 | 0.897 | 18.42  | 20 | 20 | 7.88E-09 | 0.793  | 0.950 | v6.0          | KKI |
| RH_parahippocampal_thickavg  | ICC2 | 0.790 | 20.86  | 20 | 20 | 2.53E-09 | 0.151  | 0.926 | v6.0 vs. v7.1 | KKI |
| RH_parahippocampal_thickavg  | ICC3 | 0.916 | 22.89  | 20 | 20 | 1.08E-09 | 0.830  | 0.960 | v7.1          | KKI |
| RH_parsopercularis_surfavg   | ICC3 | 0.991 | 213.25 | 20 | 20 | 4.36E-19 | 0.980  | 0.996 | v5.3          | KKI |
| RH_parsopercularis_surfavg   | ICC2 | 0.756 | 7.00   | 20 | 20 | 2.91E-05 | 0.545  | 0.877 | v5.3 vs. v6.0 | KKI |
| RH_parsopercularis_surfavg   | ICC2 | 0.739 | 6.48   | 20 | 20 | 5.29E-05 | 0.517  | 0.868 | v5.3 vs. v7.1 | KKI |
| RH_parsopercularis_surfavg   | ICC3 | 0.909 | 20.86  | 20 | 20 | 2.53E-09 | 0.815  | 0.956 | v6.0          | KKI |
| RH_parsopercularis_surfavg   | ICC2 | 0.990 | 181.45 | 20 | 20 | 2.16E-18 | 0.978  | 0.995 | v6.0 vs. v7.1 | KKI |
| RH_parsopercularis_surfavg   | ICC3 | 0.986 | 146.79 | 20 | 20 | 1.76E-17 | 0.971  | 0.994 | v7.1          | KKI |
| RH_parsopercularis_thickavg  | ICC3 | 0.870 | 14.35  | 20 | 20 | 7.35E-08 | 0.742  | 0.936 | v5.3          | KKI |
| RH_parsopercularis_thickavg  | ICC2 | 0.849 | 17.97  | 20 | 20 | 9.85E-09 | 0.582  | 0.936 | v5.3 vs. v6.0 | KKI |
| RH_parsopercularis_thickavg  | ICC2 | 0.876 | 15.99  | 20 | 20 | 2.81E-08 | 0.756  | 0.940 | v5.3 vs. v7.1 | KKI |
| RH_parsopercularis_thickavg  | ICC3 | 0.920 | 24.04  | 20 | 20 | 6.84E-10 | 0.838  | 0.962 | v6.0          | KKI |
| RH_parsopercularis_thickavg  | ICC2 | 0.923 | 31.14  | 20 | 20 | 6.08E-11 | 0.816  | 0.965 | v6.0 vs. v7.1 | KKI |
| RH_parsopercularis_thickavg  | ICC3 | 0.833 | 10.94  | 20 | 20 | 7.68E-07 | 0.675  | 0.918 | v7.1          | KKI |
| RH_parsorbitalis_surfavg     | ICC3 | 0.939 | 31.88  | 20 | 20 | 4.87E-11 | 0.875  | 0.971 | v5.3          | KKI |
| RH_parsorbitalis_surfavg     | ICC2 | 0.779 | 32.14  | 20 | 20 | 4.51E-11 | 0.012  | 0.929 | v5.3 vs. v6.0 | KKI |
| RH_parsorbitalis_surfavg     | ICC2 | 0.673 | 25.74  | 20 | 20 | 3.62E-10 | -0.034 | 0.890 | v5.3 vs. v7.1 | KKI |
| RH_parsorbitalis_surfavg     | ICC3 | 0.968 | 61.07  | 20 | 20 | 9.54E-14 | 0.933  | 0.985 | v6.0          | KKI |
| RH_parsorbitalis_surfavg     | ICC2 | 0.950 | 72.69  | 20 | 20 | 1.75E-14 | 0.757  | 0.982 | v6.0 vs. v7.1 | KKI |
| RH_parsorbitalis_surfavg     | ICC3 | 0.980 | 97.02  | 20 | 20 | 1.04E-15 | 0.957  | 0.990 | v7.1          | KKI |
| RH_parsorbitalis_thickavg    | ICC3 | 0.900 | 18.96  | 20 | 20 | 6.05E-09 | 0.799  | 0.952 | v5.3          | KKI |
| RH_parsorbitalis_thickavg    | ICC2 | 0.877 | 16.51  | 20 | 20 | 2.12E-08 | 0.753  | 0.940 | v5.3 vs. v6.0 | KKI |
| RH_parsorbitalis_thickavg    | ICC2 | 0.872 | 15.48  | 20 | 20 | 3.75E-08 | 0.747  | 0.937 | v5.3 vs. v7.1 | KKI |
| RH_parsorbitalis_thickavg    | ICC3 | 0.889 | 16.97  | 20 | 20 | 1.65E-08 | 0.778  | 0.946 | v6.0          | KKI |
| RH_parsorbitalis_thickavg    | ICC2 | 0.944 | 33.41  | 20 | 20 | 3.12E-11 | 0.885  | 0.973 | v6.0 vs. v7.1 | KKI |
| RH_parsorbitalis_thickavg    | ICC3 | 0.909 | 20.97  | 20 | 20 | 2.42E-09 | 0.816  | 0.956 | v7.1          | KKI |
| RH_parsotriangularis_surfavg | ICC3 | 0.983 | 118.44 | 20 | 20 | 1.46E-16 | 0.965  | 0.992 | v5.3          | KKI |



|                                |      |       |        |    |    |          |        |       |               |     |
|--------------------------------|------|-------|--------|----|----|----------|--------|-------|---------------|-----|
| RH_parstriangularis_surfavg    | ICC2 | 0.836 | 12.80  | 20 | 20 | 2.01E-07 | 0.666  | 0.921 | v5.3 vs. v6.0 | KKI |
| RH_parstriangularis_surfavg    | ICC2 | 0.827 | 13.29  | 20 | 20 | 1.44E-07 | 0.615  | 0.920 | v5.3 vs. v7.1 | KKI |
| RH_parstriangularis_surfavg    | ICC3 | 0.943 | 34.14  | 20 | 20 | 2.54E-11 | 0.883  | 0.973 | v6.0          | KKI |
| RH_parstriangularis_surfavg    | ICC2 | 0.993 | 349.09 | 20 | 20 | 3.26E-21 | 0.983  | 0.997 | v6.0 vs. v7.1 | KKI |
| RH_parstriangularis_surfavg    | ICC3 | 0.987 | 151.51 | 20 | 20 | 1.29E-17 | 0.972  | 0.994 | v7.1          | KKI |
| RH_parstriangularis_thickavg   | ICC3 | 0.902 | 19.41  | 20 | 20 | 4.89E-09 | 0.803  | 0.953 | v5.3          | KKI |
| RH_parstriangularis_thickavg   | ICC2 | 0.954 | 48.15  | 20 | 20 | 9.49E-13 | 0.898  | 0.978 | v5.3 vs. v6.0 | KKI |
| RH_parstriangularis_thickavg   | ICC2 | 0.921 | 25.27  | 20 | 20 | 4.30E-10 | 0.841  | 0.962 | v5.3 vs. v7.1 | KKI |
| RH_parstriangularis_thickavg   | ICC3 | 0.939 | 31.98  | 20 | 20 | 4.71E-11 | 0.875  | 0.971 | v6.0          | KKI |
| RH_parstriangularis_thickavg   | ICC2 | 0.941 | 31.48  | 20 | 20 | 5.48E-11 | 0.879  | 0.972 | v6.0 vs. v7.1 | KKI |
| RH_parstriangularis_thickavg   | ICC3 | 0.916 | 22.68  | 20 | 20 | 1.17E-09 | 0.829  | 0.959 | v7.1          | KKI |
| RH_pericalcarine_surfavg       | ICC3 | 0.971 | 68.12  | 20 | 20 | 3.29E-14 | 0.940  | 0.986 | v5.3          | KKI |
| RH_pericalcarine_surfavg       | ICC2 | 0.953 | 44.98  | 20 | 20 | 1.83E-12 | 0.900  | 0.978 | v5.3 vs. v6.0 | KKI |
| RH_pericalcarine_surfavg       | ICC2 | 0.942 | 35.62  | 20 | 20 | 1.70E-11 | 0.881  | 0.972 | v5.3 vs. v7.1 | KKI |
| RH_pericalcarine_surfavg       | ICC3 | 0.990 | 194.74 | 20 | 20 | 1.07E-18 | 0.978  | 0.995 | v6.0          | KKI |
| RH_pericalcarine_surfavg       | ICC2 | 0.992 | 238.37 | 20 | 20 | 1.45E-19 | 0.983  | 0.996 | v6.0 vs. v7.1 | KKI |
| RH_pericalcarine_surfavg       | ICC3 | 0.987 | 151.20 | 20 | 20 | 1.31E-17 | 0.972  | 0.994 | v7.1          | KKI |
| RH_pericalcarine_thickavg      | ICC3 | 0.844 | 11.86  | 20 | 20 | 3.87E-07 | 0.696  | 0.924 | v5.3          | KKI |
| RH_pericalcarine_thickavg      | ICC2 | 0.679 | 15.47  | 20 | 20 | 3.79E-08 | -0.005 | 0.883 | v5.3 vs. v6.0 | KKI |
| RH_pericalcarine_thickavg      | ICC2 | 0.756 | 13.95  | 20 | 20 | 9.43E-08 | 0.223  | 0.905 | v5.3 vs. v7.1 | KKI |
| RH_pericalcarine_thickavg      | ICC3 | 0.863 | 13.65  | 20 | 20 | 1.14E-07 | 0.731  | 0.933 | v6.0          | KKI |
| RH_pericalcarine_thickavg      | ICC2 | 0.913 | 25.84  | 20 | 20 | 3.49E-10 | 0.811  | 0.960 | v6.0 vs. v7.1 | KKI |
| RH_pericalcarine_thickavg      | ICC3 | 0.953 | 41.54  | 20 | 20 | 3.92E-12 | 0.903  | 0.978 | v7.1          | KKI |
| RH_postcentral_surfavg         | ICC3 | 0.979 | 93.68  | 20 | 20 | 1.46E-15 | 0.956  | 0.990 | v5.3          | KKI |
| RH_postcentral_surfavg         | ICC2 | 0.964 | 52.11  | 20 | 20 | 4.43E-13 | 0.925  | 0.983 | v5.3 vs. v6.0 | KKI |
| RH_postcentral_surfavg         | ICC2 | 0.948 | 36.10  | 20 | 20 | 1.50E-11 | 0.893  | 0.975 | v5.3 vs. v7.1 | KKI |
| RH_postcentral_surfavg         | ICC3 | 0.989 | 181.11 | 20 | 20 | 2.20E-18 | 0.977  | 0.995 | v6.0          | KKI |
| RH_postcentral_surfavg         | ICC2 | 0.991 | 278.88 | 20 | 20 | 3.04E-20 | 0.979  | 0.996 | v6.0 vs. v7.1 | KKI |
| RH_postcentral_surfavg         | ICC3 | 0.992 | 246.34 | 20 | 20 | 1.04E-19 | 0.983  | 0.996 | v7.1          | KKI |
| RH_postcentral_thickavg        | ICC3 | 0.881 | 15.80  | 20 | 20 | 3.13E-08 | 0.763  | 0.942 | v5.3          | KKI |
| RH_postcentral_thickavg        | ICC2 | 0.845 | 105.67 | 20 | 20 | 4.49E-16 | 0.012  | 0.957 | v5.3 vs. v6.0 | KKI |
| RH_postcentral_thickavg        | ICC2 | 0.856 | 56.21  | 20 | 20 | 2.13E-13 | 0.066  | 0.957 | v5.3 vs. v7.1 | KKI |
| RH_postcentral_thickavg        | ICC3 | 0.984 | 122.44 | 20 | 20 | 1.05E-16 | 0.966  | 0.992 | v6.0          | KKI |
| RH_postcentral_thickavg        | ICC2 | 0.972 | 74.65  | 20 | 20 | 1.35E-14 | 0.942  | 0.987 | v6.0 vs. v7.1 | KKI |
| RH_postcentral_thickavg        | ICC3 | 0.980 | 96.68  | 20 | 20 | 1.07E-15 | 0.957  | 0.990 | v7.1          | KKI |
| RH_posteriorcingulate_surfavg  | ICC3 | 0.987 | 155.55 | 20 | 20 | 9.91E-18 | 0.973  | 0.994 | v5.3          | KKI |
| RH_posteriorcingulate_surfavg  | ICC2 | 0.905 | 19.27  | 20 | 20 | 5.22E-09 | 0.809  | 0.954 | v5.3 vs. v6.0 | KKI |
| RH_posteriorcingulate_surfavg  | ICC2 | 0.920 | 22.80  | 20 | 20 | 1.11E-09 | 0.836  | 0.961 | v5.3 vs. v7.1 | KKI |
| RH_posteriorcingulate_surfavg  | ICC3 | 0.972 | 70.06  | 20 | 20 | 2.51E-14 | 0.941  | 0.987 | v6.0          | KKI |
| RH_posteriorcingulate_surfavg  | ICC2 | 0.965 | 55.80  | 20 | 20 | 2.28E-13 | 0.928  | 0.983 | v6.0 vs. v7.1 | KKI |
| RH_posteriorcingulate_surfavg  | ICC3 | 0.978 | 89.64  | 20 | 20 | 2.25E-15 | 0.954  | 0.990 | v7.1          | KKI |
| RH_posteriorcingulate_thickavg | ICC3 | 0.899 | 18.82  | 20 | 20 | 6.48E-09 | 0.797  | 0.951 | v5.3          | KKI |
| RH_posteriorcingulate_thickavg | ICC2 | 0.964 | 56.43  | 20 | 20 | 2.05E-13 | 0.925  | 0.983 | v5.3 vs. v6.0 | KKI |
| RH_posteriorcingulate_thickavg | ICC2 | 0.720 | 17.63  | 20 | 20 | 1.17E-08 | 0.026  | 0.901 | v5.3 vs. v7.1 | KKI |

|                                      |      |       |        |    |    |          |        |       |               |     |
|--------------------------------------|------|-------|--------|----|----|----------|--------|-------|---------------|-----|
| RH_posteriorcingulate_thickavg       | ICC3 | 0.904 | 19.74  | 20 | 20 | 4.20E-09 | 0.806  | 0.953 | v6.0          | KKI |
| RH_posteriorcingulate_thickavg       | ICC2 | 0.764 | 21.15  | 20 | 20 | 2.23E-09 | 0.066  | 0.919 | v6.0 vs. v7.1 | KKI |
| RH_posteriorcingulate_thickavg       | ICC3 | 0.886 | 16.55  | 20 | 20 | 2.07E-08 | 0.773  | 0.945 | v7.1          | KKI |
| RH_precentral_surfvag                | ICC3 | 0.834 | 11.06  | 20 | 20 | 7.02E-07 | 0.678  | 0.918 | v5.3          | KKI |
| RH_precentral_surfvag                | ICC2 | 0.764 | 7.45   | 20 | 20 | 1.79E-05 | 0.561  | 0.881 | v5.3 vs. v6.0 | KKI |
| RH_precentral_surfvag                | ICC2 | 0.780 | 8.33   | 20 | 20 | 7.36E-06 | 0.589  | 0.889 | v5.3 vs. v7.1 | KKI |
| RH_precentral_surfvag                | ICC3 | 0.799 | 8.96   | 20 | 20 | 4.06E-06 | 0.617  | 0.900 | v6.0          | KKI |
| RH_precentral_surfvag                | ICC2 | 0.995 | 485.70 | 20 | 20 | 1.22E-22 | 0.988  | 0.998 | v6.0 vs. v7.1 | KKI |
| RH_precentral_surfvag                | ICC3 | 0.991 | 216.02 | 20 | 20 | 3.84E-19 | 0.981  | 0.996 | v7.1          | KKI |
| RH_precentral_thickavg               | ICC3 | 0.688 | 5.41   | 20 | 20 | 2.01E-04 | 0.436  | 0.840 | v5.3          | KKI |
| RH_precentral_thickavg               | ICC2 | 0.731 | 8.04   | 20 | 20 | 9.81E-06 | 0.456  | 0.870 | v5.3 vs. v6.0 | KKI |
| RH_precentral_thickavg               | ICC2 | 0.732 | 7.35   | 20 | 20 | 2.00E-05 | 0.494  | 0.865 | v5.3 vs. v7.1 | KKI |
| RH_precentral_thickavg               | ICC3 | 0.923 | 25.09  | 20 | 20 | 4.60E-10 | 0.844  | 0.963 | v6.0          | KKI |
| RH_precentral_thickavg               | ICC2 | 0.959 | 50.27  | 20 | 20 | 6.27E-13 | 0.915  | 0.981 | v6.0 vs. v7.1 | KKI |
| RH_precentral_thickavg               | ICC3 | 0.924 | 25.35  | 20 | 20 | 4.18E-10 | 0.845  | 0.964 | v7.1          | KKI |
| RH_precuneus_surfvag                 | ICC3 | 0.973 | 74.35  | 20 | 20 | 1.40E-14 | 0.944  | 0.987 | v5.3          | KKI |
| RH_precuneus_surfvag                 | ICC2 | 0.960 | 48.20  | 20 | 20 | 9.39E-13 | 0.918  | 0.981 | v5.3 vs. v6.0 | KKI |
| RH_precuneus_surfvag                 | ICC2 | 0.949 | 38.90  | 20 | 20 | 7.34E-12 | 0.897  | 0.976 | v5.3 vs. v7.1 | KKI |
| RH_precuneus_surfvag                 | ICC3 | 0.991 | 213.47 | 20 | 20 | 4.32E-19 | 0.980  | 0.996 | v6.0          | KKI |
| RH_precuneus_surfvag                 | ICC2 | 0.996 | 511.48 | 20 | 20 | 7.27E-23 | 0.991  | 0.998 | v6.0 vs. v7.1 | KKI |
| RH_precuneus_surfvag                 | ICC3 | 0.993 | 280.17 | 20 | 20 | 2.91E-20 | 0.985  | 0.997 | v7.1          | KKI |
| RH_precuneus_thickavg                | ICC3 | 0.886 | 16.48  | 20 | 20 | 2.15E-08 | 0.772  | 0.944 | v5.3          | KKI |
| RH_precuneus_thickavg                | ICC2 | 0.943 | 89.95  | 20 | 20 | 2.18E-15 | 0.534  | 0.982 | v5.3 vs. v6.0 | KKI |
| RH_precuneus_thickavg                | ICC2 | 0.938 | 40.32  | 20 | 20 | 5.21E-12 | 0.841  | 0.973 | v5.3 vs. v7.1 | KKI |
| RH_precuneus_thickavg                | ICC3 | 0.915 | 22.66  | 20 | 20 | 1.18E-09 | 0.829  | 0.959 | v6.0          | KKI |
| RH_precuneus_thickavg                | ICC2 | 0.954 | 45.54  | 20 | 20 | 1.62E-12 | 0.903  | 0.978 | v6.0 vs. v7.1 | KKI |
| RH_precuneus_thickavg                | ICC3 | 0.865 | 13.77  | 20 | 20 | 1.05E-07 | 0.733  | 0.934 | v7.1          | KKI |
| RH_Putamen                           | ICC3 | 0.958 | 46.51  | 20 | 20 | 1.33E-12 | 0.913  | 0.980 | v5.3          | KKI |
| RH_Putamen                           | ICC2 | 0.328 | 17.97  | 20 | 20 | 9.85E-09 | -0.023 | 0.674 | v5.3 vs. v6.0 | KKI |
| RH_Putamen                           | ICC2 | 0.346 | 17.37  | 20 | 20 | 1.34E-08 | -0.026 | 0.690 | v5.3 vs. v7.1 | KKI |
| RH_Putamen                           | ICC3 | 0.985 | 134.08 | 20 | 20 | 4.30E-17 | 0.969  | 0.993 | v6.0          | KKI |
| RH_Putamen                           | ICC2 | 0.967 | 69.64  | 20 | 20 | 2.66E-14 | 0.927  | 0.985 | v6.0 vs. v7.1 | KKI |
| RH_Putamen                           | ICC3 | 0.976 | 81.40  | 20 | 20 | 5.79E-15 | 0.949  | 0.988 | v7.1          | KKI |
| RH_rostralanteriorcingulate_surfvag  | ICC3 | 0.875 | 15.01  | 20 | 20 | 4.95E-08 | 0.752  | 0.939 | v5.3          | KKI |
| RH_rostralanteriorcingulate_surfvag  | ICC2 | 0.662 | 11.99  | 20 | 20 | 3.53E-07 | 0.023  | 0.869 | v5.3 vs. v6.0 | KKI |
| RH_rostralanteriorcingulate_surfvag  | ICC2 | 0.674 | 9.34   | 20 | 20 | 2.90E-06 | 0.153  | 0.863 | v5.3 vs. v7.1 | KKI |
| RH_rostralanteriorcingulate_surfvag  | ICC3 | 0.968 | 61.10  | 20 | 20 | 9.48E-14 | 0.933  | 0.985 | v6.0          | KKI |
| RH_rostralanteriorcingulate_surfvag  | ICC2 | 0.960 | 64.48  | 20 | 20 | 5.62E-14 | 0.895  | 0.983 | v6.0 vs. v7.1 | KKI |
| RH_rostralanteriorcingulate_surfvag  | ICC3 | 0.970 | 66.60  | 20 | 20 | 4.11E-14 | 0.938  | 0.986 | v7.1          | KKI |
| RH_rostralanteriorcingulate_thickavg | ICC3 | 0.833 | 10.94  | 20 | 20 | 7.69E-07 | 0.675  | 0.918 | v5.3          | KKI |
| RH_rostralanteriorcingulate_thickavg | ICC2 | 0.757 | 6.95   | 20 | 20 | 3.09E-05 | 0.544  | 0.878 | v5.3 vs. v6.0 | KKI |
| RH_rostralanteriorcingulate_thickavg | ICC2 | 0.574 | 7.63   | 20 | 20 | 1.49E-05 | 0.013  | 0.816 | v5.3 vs. v7.1 | KKI |
| RH_rostralanteriorcingulate_thickavg | ICC3 | 0.900 | 19.01  | 20 | 20 | 5.92E-09 | 0.799  | 0.952 | v6.0          | KKI |
| RH_rostralanteriorcingulate_thickavg | ICC2 | 0.669 | 23.66  | 20 | 20 | 7.93E-10 | -0.035 | 0.887 | v6.0 vs. v7.1 | KKI |

|                                      |      |       |        |    |    |          |       |       |               |     |
|--------------------------------------|------|-------|--------|----|----|----------|-------|-------|---------------|-----|
| RH_rostralanteriorcingulate_thickavg | ICC3 | 0.898 | 18.65  | 20 | 20 | 7.05E-09 | 0.795 | 0.951 | v7.1          | KKI |
| RH_rostralmiddlefrontal_surfav       | ICC3 | 0.971 | 68.35  | 20 | 20 | 3.19E-14 | 0.940 | 0.986 | v5.3          | KKI |
| RH_rostralmiddlefrontal_surfav       | ICC2 | 0.860 | 14.76  | 20 | 20 | 5.75E-08 | 0.718 | 0.932 | v5.3 vs. v6.0 | KKI |
| RH_rostralmiddlefrontal_surfav       | ICC2 | 0.857 | 14.43  | 20 | 20 | 6.99E-08 | 0.711 | 0.931 | v5.3 vs. v7.1 | KKI |
| RH_rostralmiddlefrontal_surfav       | ICC3 | 0.914 | 22.27  | 20 | 20 | 1.39E-09 | 0.826 | 0.959 | v6.0          | KKI |
| RH_rostralmiddlefrontal_surfav       | ICC2 | 0.995 | 416.34 | 20 | 20 | 5.65E-22 | 0.990 | 0.998 | v6.0 vs. v7.1 | KKI |
| RH_rostralmiddlefrontal_surfav       | ICC3 | 0.988 | 170.50 | 20 | 20 | 4.00E-18 | 0.975 | 0.994 | v7.1          | KKI |
| RH_rostralmiddlefrontal_thickavg     | ICC3 | 0.719 | 6.11   | 20 | 20 | 8.23E-05 | 0.484 | 0.857 | v5.3          | KKI |
| RH_rostralmiddlefrontal_thickavg     | ICC2 | 0.768 | 15.96  | 20 | 20 | 2.87E-08 | 0.200 | 0.913 | v5.3 vs. v6.0 | KKI |
| RH_rostralmiddlefrontal_thickavg     | ICC2 | 0.775 | 12.65  | 20 | 20 | 2.21E-07 | 0.380 | 0.906 | v5.3 vs. v7.1 | KKI |
| RH_rostralmiddlefrontal_thickavg     | ICC3 | 0.902 | 19.45  | 20 | 20 | 4.81E-09 | 0.803 | 0.953 | v6.0          | KKI |
| RH_rostralmiddlefrontal_thickavg     | ICC2 | 0.908 | 21.85  | 20 | 20 | 1.65E-09 | 0.816 | 0.956 | v6.0 vs. v7.1 | KKI |
| RH_rostralmiddlefrontal_thickavg     | ICC3 | 0.874 | 14.92  | 20 | 20 | 5.21E-08 | 0.751 | 0.939 | v7.1          | KKI |
| RH_superiorfrontal_surfav            | ICC3 | 0.985 | 135.39 | 20 | 20 | 3.90E-17 | 0.969 | 0.993 | v5.3          | KKI |
| RH_superiorfrontal_surfav            | ICC2 | 0.907 | 27.80  | 20 | 20 | 1.77E-10 | 0.756 | 0.960 | v5.3 vs. v6.0 | KKI |
| RH_superiorfrontal_surfav            | ICC2 | 0.870 | 21.05  | 20 | 20 | 2.33E-09 | 0.629 | 0.945 | v5.3 vs. v7.1 | KKI |
| RH_superiorfrontal_surfav            | ICC3 | 0.991 | 214.49 | 20 | 20 | 4.12E-19 | 0.980 | 0.996 | v6.0          | KKI |
| RH_superiorfrontal_surfav            | ICC2 | 0.986 | 172.46 | 20 | 20 | 3.57E-18 | 0.967 | 0.994 | v6.0 vs. v7.1 | KKI |
| RH_superiorfrontal_surfav            | ICC3 | 0.985 | 131.01 | 20 | 20 | 5.40E-17 | 0.968 | 0.993 | v7.1          | KKI |
| RH_superiorfrontal_thickavg          | ICC3 | 0.806 | 9.32   | 20 | 20 | 2.95E-06 | 0.629 | 0.904 | v5.3          | KKI |
| RH_superiorfrontal_thickavg          | ICC2 | 0.928 | 26.50  | 20 | 20 | 2.76E-10 | 0.855 | 0.965 | v5.3 vs. v6.0 | KKI |
| RH_superiorfrontal_thickavg          | ICC2 | 0.941 | 31.63  | 20 | 20 | 5.24E-11 | 0.879 | 0.972 | v5.3 vs. v7.1 | KKI |
| RH_superiorfrontal_thickavg          | ICC3 | 0.859 | 13.23  | 20 | 20 | 1.50E-07 | 0.723 | 0.931 | v6.0          | KKI |
| RH_superiorfrontal_thickavg          | ICC2 | 0.946 | 35.56  | 20 | 20 | 1.73E-11 | 0.889 | 0.974 | v6.0 vs. v7.1 | KKI |
| RH_superiorfrontal_thickavg          | ICC3 | 0.803 | 9.18   | 20 | 20 | 3.35E-06 | 0.624 | 0.902 | v7.1          | KKI |
| RH_superiorparietal_surfav           | ICC3 | 0.886 | 16.53  | 20 | 20 | 2.09E-08 | 0.772 | 0.945 | v5.3          | KKI |
| RH_superiorparietal_surfav           | ICC2 | 0.921 | 23.70  | 20 | 20 | 7.80E-10 | 0.841 | 0.962 | v5.3 vs. v6.0 | KKI |
| RH_superiorparietal_surfav           | ICC2 | 0.913 | 21.27  | 20 | 20 | 2.12E-09 | 0.825 | 0.958 | v5.3 vs. v7.1 | KKI |
| RH_superiorparietal_surfav           | ICC3 | 0.984 | 124.45 | 20 | 20 | 8.96E-17 | 0.966 | 0.992 | v6.0          | KKI |
| RH_superiorparietal_surfav           | ICC2 | 0.995 | 415.32 | 20 | 20 | 5.79E-22 | 0.990 | 0.998 | v6.0 vs. v7.1 | KKI |
| RH_superiorparietal_surfav           | ICC3 | 0.987 | 154.98 | 20 | 20 | 1.03E-17 | 0.973 | 0.994 | v7.1          | KKI |
| RH_superiorparietal_thickavg         | ICC3 | 0.883 | 16.06  | 20 | 20 | 2.70E-08 | 0.766 | 0.943 | v5.3          | KKI |
| RH_superiorparietal_thickavg         | ICC2 | 0.871 | 34.78  | 20 | 20 | 2.13E-11 | 0.322 | 0.957 | v5.3 vs. v6.0 | KKI |
| RH_superiorparietal_thickavg         | ICC2 | 0.870 | 38.13  | 20 | 20 | 8.88E-12 | 0.263 | 0.958 | v5.3 vs. v7.1 | KKI |
| RH_superiorparietal_thickavg         | ICC3 | 0.886 | 16.57  | 20 | 20 | 2.04E-08 | 0.773 | 0.945 | v6.0          | KKI |
| RH_superiorparietal_thickavg         | ICC2 | 0.984 | 117.82 | 20 | 20 | 1.54E-16 | 0.966 | 0.992 | v6.0 vs. v7.1 | KKI |
| RH_superiorparietal_thickavg         | ICC3 | 0.844 | 11.85  | 20 | 20 | 3.91E-07 | 0.696 | 0.924 | v7.1          | KKI |
| RH_superiortemporal_surfav           | ICC3 | 0.984 | 125.14 | 20 | 20 | 8.49E-17 | 0.967 | 0.993 | v5.3          | KKI |
| RH_superiortemporal_surfav           | ICC2 | 0.910 | 83.29  | 20 | 20 | 4.63E-15 | 0.191 | 0.974 | v5.3 vs. v6.0 | KKI |
| RH_superiortemporal_surfav           | ICC2 | 0.859 | 68.37  | 20 | 20 | 3.18E-14 | 0.046 | 0.959 | v5.3 vs. v7.1 | KKI |
| RH_superiortemporal_surfav           | ICC3 | 0.989 | 184.60 | 20 | 20 | 1.82E-18 | 0.977 | 0.995 | v6.0          | KKI |
| RH_superiortemporal_surfav           | ICC2 | 0.986 | 317.84 | 20 | 20 | 8.29E-21 | 0.880 | 0.995 | v6.0 vs. v7.1 | KKI |
| RH_superiortemporal_surfav           | ICC3 | 0.988 | 166.53 | 20 | 20 | 5.05E-18 | 0.975 | 0.994 | v7.1          | KKI |
| RH_superiortemporal_thickavg         | ICC3 | 0.966 | 58.38  | 20 | 20 | 1.48E-13 | 0.930 | 0.984 | v5.3          | KKI |

|                              |      |       |         |    |    |          |        |       |               |     |
|------------------------------|------|-------|---------|----|----|----------|--------|-------|---------------|-----|
| RH_superiortemporal_thickavg | ICC2 | 0.976 | 80.78   | 20 | 20 | 6.24E-15 | 0.950  | 0.989 | v5.3 vs. v6.0 | KKI |
| RH_superiortemporal_thickavg | ICC2 | 0.974 | 82.84   | 20 | 20 | 4.88E-15 | 0.943  | 0.988 | v5.3 vs. v7.1 | KKI |
| RH_superiortemporal_thickavg | ICC3 | 0.972 | 70.01   | 20 | 20 | 2.53E-14 | 0.941  | 0.987 | v6.0          | KKI |
| RH_superiortemporal_thickavg | ICC2 | 0.971 | 86.71   | 20 | 20 | 3.12E-15 | 0.922  | 0.987 | v6.0 vs. v7.1 | KKI |
| RH_superiortemporal_thickavg | ICC3 | 0.972 | 69.19   | 20 | 20 | 2.83E-14 | 0.940  | 0.986 | v7.1          | KKI |
| RH_supramarginal_surfavg     | ICC3 | 0.977 | 87.44   | 20 | 20 | 2.88E-15 | 0.953  | 0.989 | v5.3          | KKI |
| RH_supramarginal_surfavg     | ICC2 | 0.793 | 10.25   | 20 | 20 | 1.34E-06 | 0.582  | 0.900 | v5.3 vs. v6.0 | KKI |
| RH_supramarginal_surfavg     | ICC2 | 0.822 | 11.02   | 20 | 20 | 7.25E-07 | 0.656  | 0.912 | v5.3 vs. v7.1 | KKI |
| RH_supramarginal_surfavg     | ICC3 | 0.988 | 167.69  | 20 | 20 | 4.72E-18 | 0.975  | 0.994 | v6.0          | KKI |
| RH_supramarginal_surfavg     | ICC2 | 0.989 | 255.10  | 20 | 20 | 7.37E-20 | 0.967  | 0.996 | v6.0 vs. v7.1 | KKI |
| RH_supramarginal_surfavg     | ICC3 | 0.996 | 479.07  | 20 | 20 | 1.40E-22 | 0.991  | 0.998 | v7.1          | KKI |
| RH_supramarginal_thickavg    | ICC3 | 0.876 | 15.13   | 20 | 20 | 4.60E-08 | 0.754  | 0.940 | v5.3          | KKI |
| RH_supramarginal_thickavg    | ICC2 | 0.885 | 18.70   | 20 | 20 | 6.86E-09 | 0.759  | 0.945 | v5.3 vs. v6.0 | KKI |
| RH_supramarginal_thickavg    | ICC2 | 0.908 | 20.48   | 20 | 20 | 2.99E-09 | 0.816  | 0.955 | v5.3 vs. v7.1 | KKI |
| RH_supramarginal_thickavg    | ICC3 | 0.894 | 17.79   | 20 | 20 | 1.08E-08 | 0.787  | 0.948 | v6.0          | KKI |
| RH_supramarginal_thickavg    | ICC2 | 0.936 | 34.12   | 20 | 20 | 2.56E-11 | 0.864  | 0.970 | v6.0 vs. v7.1 | KKI |
| RH_supramarginal_thickavg    | ICC3 | 0.852 | 12.54   | 20 | 20 | 2.40E-07 | 0.710  | 0.928 | v7.1          | KKI |
| RH_SurfArea                  | ICC3 | 0.997 | 584.54  | 20 | 20 | 1.92E-23 | 0.993  | 0.998 | v5.3          | KKI |
| RH_SurfArea                  | ICC2 | 0.983 | 984.58  | 20 | 20 | 1.06E-25 | 0.404  | 0.996 | v5.3 vs. v6.0 | KKI |
| RH_SurfArea                  | ICC2 | 0.954 | 772.72  | 20 | 20 | 1.19E-24 | 0.103  | 0.989 | v5.3 vs. v7.1 | KKI |
| RH_SurfArea                  | ICC3 | 0.996 | 519.42  | 20 | 20 | 6.24E-23 | 0.992  | 0.998 | v6.0          | KKI |
| RH_SurfArea                  | ICC2 | 0.990 | 1561.98 | 20 | 20 | 1.06E-27 | 0.564  | 0.998 | v6.0 vs. v7.1 | KKI |
| RH_SurfArea                  | ICC3 | 0.995 | 384.23  | 20 | 20 | 1.26E-21 | 0.989  | 0.998 | v7.1          | KKI |
| RH_temporalpole_surfavg      | ICC3 | 0.732 | 6.46    | 20 | 20 | 5.44E-05 | 0.505  | 0.864 | v5.3          | KKI |
| RH_temporalpole_surfavg      | ICC2 | 0.410 | 5.01    | 20 | 20 | 3.46E-04 | -0.058 | 0.709 | v5.3 vs. v6.0 | KKI |
| RH_temporalpole_surfavg      | ICC2 | 0.226 | 3.44    | 20 | 20 | 4.02E-03 | -0.071 | 0.531 | v5.3 vs. v7.1 | KKI |
| RH_temporalpole_surfavg      | ICC3 | 0.815 | 9.83    | 20 | 20 | 1.89E-06 | 0.645  | 0.909 | v6.0          | KKI |
| RH_temporalpole_surfavg      | ICC2 | 0.713 | 12.15   | 20 | 20 | 3.13E-07 | 0.138  | 0.887 | v6.0 vs. v7.1 | KKI |
| RH_temporalpole_surfavg      | ICC3 | 0.858 | 13.04   | 20 | 20 | 1.70E-07 | 0.720  | 0.930 | v7.1          | KKI |
| RH_temporalpole_thickavg     | ICC3 | 0.751 | 7.03    | 20 | 20 | 2.81E-05 | 0.536  | 0.875 | v5.3          | KKI |
| RH_temporalpole_thickavg     | ICC2 | 0.796 | 13.80   | 20 | 20 | 1.04E-07 | 0.434  | 0.914 | v5.3 vs. v6.0 | KKI |
| RH_temporalpole_thickavg     | ICC2 | 0.790 | 24.26   | 20 | 20 | 6.28E-10 | 0.093  | 0.929 | v5.3 vs. v7.1 | KKI |
| RH_temporalpole_thickavg     | ICC3 | 0.698 | 5.61    | 20 | 20 | 1.54E-04 | 0.451  | 0.845 | v6.0          | KKI |
| RH_temporalpole_thickavg     | ICC2 | 0.844 | 12.50   | 20 | 20 | 2.45E-07 | 0.696  | 0.923 | v6.0 vs. v7.1 | KKI |
| RH_temporalpole_thickavg     | ICC3 | 0.650 | 4.71    | 20 | 20 | 5.31E-04 | 0.378  | 0.818 | v7.1          | KKI |
| RH_Thalamus                  | ICC3 | 0.931 | 28.17   | 20 | 20 | 1.56E-10 | 0.860  | 0.967 | v5.3          | KKI |
| RH_Thalamus                  | ICC2 | 0.906 | 19.58   | 20 | 20 | 4.53E-09 | 0.811  | 0.955 | v5.3 vs. v6.0 | KKI |
| RH_Thalamus                  | ICC2 | 0.805 | 28.17   | 20 | 20 | 1.56E-10 | 0.089  | 0.936 | v5.3 vs. v7.1 | KKI |
| RH_Thalamus                  | ICC3 | 0.940 | 32.28   | 20 | 20 | 4.32E-11 | 0.877  | 0.971 | v6.0          | KKI |
| RH_Thalamus                  | ICC2 | 0.787 | 28.89   | 20 | 20 | 1.23E-10 | 0.039  | 0.931 | v6.0 vs. v7.1 | KKI |
| RH_Thalamus                  | ICC3 | 0.952 | 40.24   | 20 | 20 | 5.31E-12 | 0.900  | 0.977 | v7.1          | KKI |
| RH_Thickness                 | ICC3 | 0.908 | 20.79   | 20 | 20 | 2.61E-09 | 0.815  | 0.956 | v5.3          | KKI |
| RH_Thickness                 | ICC2 | 0.902 | 53.08   | 20 | 20 | 3.71E-13 | 0.330  | 0.969 | v5.3 vs. v6.0 | KKI |
| RH_Thickness                 | ICC2 | 0.958 | 58.45   | 20 | 20 | 1.46E-13 | 0.897  | 0.981 | v5.3 vs. v7.1 | KKI |

|                                     |      |       |        |    |    |          |        |       |               |     |
|-------------------------------------|------|-------|--------|----|----|----------|--------|-------|---------------|-----|
| RH_Thickness                        | ICC3 | 0.951 | 39.79  | 20 | 20 | 5.92E-12 | 0.899  | 0.977 | v6.0          | KKI |
| RH_Thickness                        | ICC2 | 0.936 | 53.23  | 20 | 20 | 3.60E-13 | 0.729  | 0.976 | v6.0 vs. v7.1 | KKI |
| RH_Thickness                        | ICC3 | 0.913 | 21.92  | 20 | 20 | 1.61E-09 | 0.823  | 0.958 | v7.1          | KKI |
| RH_transversetemporal_surfavg       | ICC3 | 0.806 | 9.30   | 20 | 20 | 2.99E-06 | 0.628  | 0.904 | v5.3          | KKI |
| RH_transversetemporal_surfavg       | ICC2 | 0.641 | 4.69   | 20 | 20 | 5.48E-04 | 0.374  | 0.812 | v5.3 vs. v6.0 | KKI |
| RH_transversetemporal_surfavg       | ICC2 | 0.579 | 3.98   | 20 | 20 | 1.63E-03 | 0.289  | 0.775 | v5.3 vs. v7.1 | KKI |
| RH_transversetemporal_surfavg       | ICC3 | 0.778 | 8.02   | 20 | 20 | 9.99E-06 | 0.581  | 0.889 | v6.0          | KKI |
| RH_transversetemporal_surfavg       | ICC2 | 0.831 | 10.65  | 20 | 20 | 9.68E-07 | 0.674  | 0.916 | v6.0 vs. v7.1 | KKI |
| RH_transversetemporal_surfavg       | ICC3 | 0.855 | 12.80  | 20 | 20 | 2.00E-07 | 0.715  | 0.929 | v7.1          | KKI |
| RH_transversetemporal_thickavg      | ICC3 | 0.888 | 16.91  | 20 | 20 | 1.70E-08 | 0.777  | 0.946 | v5.3          | KKI |
| RH_transversetemporal_thickavg      | ICC2 | 0.882 | 45.41  | 20 | 20 | 1.67E-12 | 0.255  | 0.962 | v5.3 vs. v6.0 | KKI |
| RH_transversetemporal_thickavg      | ICC2 | 0.876 | 43.85  | 20 | 20 | 2.33E-12 | 0.228  | 0.961 | v5.3 vs. v7.1 | KKI |
| RH_transversetemporal_thickavg      | ICC3 | 0.905 | 20.06  | 20 | 20 | 3.62E-09 | 0.808  | 0.954 | v6.0          | KKI |
| RH_transversetemporal_thickavg      | ICC2 | 0.973 | 69.54  | 20 | 20 | 2.70E-14 | 0.943  | 0.987 | v6.0 vs. v7.1 | KKI |
| RH_transversetemporal_thickavg      | ICC3 | 0.894 | 17.86  | 20 | 20 | 1.04E-08 | 0.787  | 0.949 | v7.1          | KKI |
| SUM_bankssts_surfavg                | ICC3 | 0.956 | 44.76  | 20 | 20 | 1.91E-12 | 0.909  | 0.979 | v5.3          | KKI |
| SUM_bankssts_surfavg                | ICC2 | 0.792 | 14.48  | 20 | 20 | 6.79E-08 | 0.379  | 0.915 | v5.3 vs. v6.0 | KKI |
| SUM_bankssts_surfavg                | ICC2 | 0.770 | 14.31  | 20 | 20 | 7.51E-08 | 0.274  | 0.910 | v5.3 vs. v7.1 | KKI |
| SUM_bankssts_surfavg                | ICC3 | 0.982 | 113.21 | 20 | 20 | 2.28E-16 | 0.963  | 0.992 | v6.0          | KKI |
| SUM_bankssts_surfavg                | ICC2 | 0.989 | 205.20 | 20 | 20 | 6.39E-19 | 0.976  | 0.995 | v6.0 vs. v7.1 | KKI |
| SUM_bankssts_surfavg                | ICC3 | 0.980 | 98.58  | 20 | 20 | 8.88E-16 | 0.958  | 0.990 | v7.1          | KKI |
| SUM_caudalanteriorcingulate_surfavg | ICC3 | 0.973 | 73.93  | 20 | 20 | 1.48E-14 | 0.944  | 0.987 | v5.3          | KKI |
| SUM_caudalanteriorcingulate_surfavg | ICC2 | 0.828 | 26.07  | 20 | 20 | 3.21E-10 | 0.211  | 0.941 | v5.3 vs. v6.0 | KKI |
| SUM_caudalanteriorcingulate_surfavg | ICC2 | 0.859 | 13.50  | 20 | 20 | 1.26E-07 | 0.726  | 0.931 | v5.3 vs. v7.1 | KKI |
| SUM_caudalanteriorcingulate_surfavg | ICC3 | 0.989 | 186.82 | 20 | 20 | 1.62E-18 | 0.978  | 0.995 | v6.0          | KKI |
| SUM_caudalanteriorcingulate_surfavg | ICC2 | 0.909 | 75.50  | 20 | 20 | 1.21E-14 | 0.223  | 0.973 | v6.0 vs. v7.1 | KKI |
| SUM_caudalanteriorcingulate_surfavg | ICC3 | 0.974 | 76.89  | 20 | 20 | 1.01E-14 | 0.946  | 0.988 | v7.1          | KKI |
| SUM_caudalmiddlefrontal_surfavg     | ICC3 | 0.942 | 33.51  | 20 | 20 | 3.03E-11 | 0.881  | 0.972 | v5.3          | KKI |
| SUM_caudalmiddlefrontal_surfavg     | ICC2 | 0.936 | 31.81  | 20 | 20 | 4.96E-11 | 0.870  | 0.969 | v5.3 vs. v6.0 | KKI |
| SUM_caudalmiddlefrontal_surfavg     | ICC2 | 0.879 | 14.79  | 20 | 20 | 5.62E-08 | 0.758  | 0.941 | v5.3 vs. v7.1 | KKI |
| SUM_caudalmiddlefrontal_surfavg     | ICC3 | 0.847 | 12.05  | 20 | 20 | 3.38E-07 | 0.700  | 0.925 | v6.0          | KKI |
| SUM_caudalmiddlefrontal_surfavg     | ICC2 | 0.928 | 27.27  | 20 | 20 | 2.12E-10 | 0.854  | 0.965 | v6.0 vs. v7.1 | KKI |
| SUM_caudalmiddlefrontal_surfavg     | ICC3 | 0.959 | 47.34  | 20 | 20 | 1.12E-12 | 0.914  | 0.980 | v7.1          | KKI |
| SUM_cuneus_surfavg                  | ICC3 | 0.971 | 67.59  | 20 | 20 | 3.55E-14 | 0.939  | 0.986 | v5.3          | KKI |
| SUM_cuneus_surfavg                  | ICC2 | 0.879 | 27.29  | 20 | 20 | 2.10E-10 | 0.549  | 0.954 | v5.3 vs. v6.0 | KKI |
| SUM_cuneus_surfavg                  | ICC2 | 0.843 | 24.12  | 20 | 20 | 6.63E-10 | 0.354  | 0.943 | v5.3 vs. v7.1 | KKI |
| SUM_cuneus_surfavg                  | ICC3 | 0.985 | 128.19 | 20 | 20 | 6.69E-17 | 0.967  | 0.993 | v6.0          | KKI |
| SUM_cuneus_surfavg                  | ICC2 | 0.983 | 148.08 | 20 | 20 | 1.61E-17 | 0.958  | 0.993 | v6.0 vs. v7.1 | KKI |
| SUM_cuneus_surfavg                  | ICC3 | 0.988 | 168.00 | 20 | 20 | 4.63E-18 | 0.975  | 0.994 | v7.1          | KKI |
| SUM_entorhinal_surfavg              | ICC3 | 0.897 | 18.48  | 20 | 20 | 7.63E-09 | 0.794  | 0.950 | v5.3          | KKI |
| SUM_entorhinal_surfavg              | ICC2 | 0.519 | 11.42  | 20 | 20 | 5.34E-07 | -0.057 | 0.805 | v5.3 vs. v6.0 | KKI |
| SUM_entorhinal_surfavg              | ICC2 | 0.523 | 7.18   | 20 | 20 | 2.41E-05 | -0.032 | 0.790 | v5.3 vs. v7.1 | KKI |
| SUM_entorhinal_surfavg              | ICC3 | 0.959 | 47.84  | 20 | 20 | 1.01E-12 | 0.915  | 0.981 | v6.0          | KKI |
| SUM_entorhinal_surfavg              | ICC2 | 0.934 | 29.39  | 20 | 20 | 1.05E-10 | 0.866  | 0.968 | v6.0 vs. v7.1 | KKI |

|                                  |      |       |        |    |    |          |        |       |               |     |
|----------------------------------|------|-------|--------|----|----|----------|--------|-------|---------------|-----|
| SUM_entorhinal_surfavg           | ICC3 | 0.948 | 37.34  | 20 | 20 | 1.09E-11 | 0.892  | 0.975 | v7.1          | KKI |
| SUM_frontalpole_surfavg          | ICC3 | 0.667 | 5.00   | 20 | 20 | 3.51E-04 | 0.404  | 0.828 | v5.3          | KKI |
| SUM_frontalpole_surfavg          | ICC2 | 0.221 | 3.28   | 20 | 20 | 5.31E-03 | -0.072 | 0.523 | v5.3 vs. v6.0 | KKI |
| SUM_frontalpole_surfavg          | ICC2 | 0.152 | 5.43   | 20 | 20 | 1.96E-04 | -0.033 | 0.431 | v5.3 vs. v7.1 | KKI |
| SUM_frontalpole_surfavg          | ICC3 | 0.847 | 12.08  | 20 | 20 | 3.30E-07 | 0.701  | 0.925 | v6.0          | KKI |
| SUM_frontalpole_surfavg          | ICC2 | 0.439 | 8.22   | 20 | 20 | 8.17E-06 | -0.064 | 0.749 | v6.0 vs. v7.1 | KKI |
| SUM_frontalpole_surfavg          | ICC3 | 0.864 | 13.76  | 20 | 20 | 1.06E-07 | 0.733  | 0.934 | v7.1          | KKI |
| SUM_fusiform_surfavg             | ICC3 | 0.976 | 80.99  | 20 | 20 | 6.09E-15 | 0.949  | 0.988 | v5.3          | KKI |
| SUM_fusiform_surfavg             | ICC2 | 0.866 | 27.14  | 20 | 20 | 2.21E-10 | 0.444  | 0.951 | v5.3 vs. v6.0 | KKI |
| SUM_fusiform_surfavg             | ICC2 | 0.907 | 33.36  | 20 | 20 | 3.16E-11 | 0.669  | 0.964 | v5.3 vs. v7.1 | KKI |
| SUM_fusiform_surfavg             | ICC3 | 0.995 | 395.25 | 20 | 20 | 9.48E-22 | 0.989  | 0.998 | v6.0          | KKI |
| SUM_fusiform_surfavg             | ICC2 | 0.987 | 237.99 | 20 | 20 | 1.47E-19 | 0.956  | 0.995 | v6.0 vs. v7.1 | KKI |
| SUM_fusiform_surfavg             | ICC3 | 0.993 | 284.35 | 20 | 20 | 2.51E-20 | 0.985  | 0.997 | v7.1          | KKI |
| SUM_inferiorparietal_surfavg     | ICC3 | 0.974 | 76.55  | 20 | 20 | 1.06E-14 | 0.946  | 0.988 | v5.3          | KKI |
| SUM_inferiorparietal_surfavg     | ICC2 | 0.889 | 34.77  | 20 | 20 | 2.14E-11 | 0.474  | 0.961 | v5.3 vs. v6.0 | KKI |
| SUM_inferiorparietal_surfavg     | ICC2 | 0.891 | 24.62  | 20 | 20 | 5.48E-10 | 0.695  | 0.954 | v5.3 vs. v7.1 | KKI |
| SUM_inferiorparietal_surfavg     | ICC3 | 0.996 | 557.76 | 20 | 20 | 3.07E-23 | 0.992  | 0.998 | v6.0          | KKI |
| SUM_inferiorparietal_surfavg     | ICC2 | 0.991 | 316.85 | 20 | 20 | 8.55E-21 | 0.974  | 0.996 | v6.0 vs. v7.1 | KKI |
| SUM_inferiorparietal_surfavg     | ICC3 | 0.991 | 230.68 | 20 | 20 | 2.00E-19 | 0.982  | 0.996 | v7.1          | KKI |
| SUM_inferiortemporal_surfavg     | ICC3 | 0.985 | 133.29 | 20 | 20 | 4.56E-17 | 0.969  | 0.993 | v5.3          | KKI |
| SUM_inferiortemporal_surfavg     | ICC2 | 0.949 | 115.95 | 20 | 20 | 1.80E-16 | 0.490  | 0.985 | v5.3 vs. v6.0 | KKI |
| SUM_inferiortemporal_surfavg     | ICC2 | 0.903 | 67.48  | 20 | 20 | 3.61E-14 | 0.223  | 0.971 | v5.3 vs. v7.1 | KKI |
| SUM_inferiortemporal_surfavg     | ICC3 | 0.994 | 336.80 | 20 | 20 | 4.66E-21 | 0.987  | 0.997 | v6.0          | KKI |
| SUM_inferiortemporal_surfavg     | ICC2 | 0.986 | 280.39 | 20 | 20 | 2.88E-20 | 0.912  | 0.995 | v6.0 vs. v7.1 | KKI |
| SUM_inferiortemporal_surfavg     | ICC3 | 0.989 | 175.15 | 20 | 20 | 3.07E-18 | 0.976  | 0.995 | v7.1          | KKI |
| SUM_insula_surfavg               | ICC3 | 0.851 | 12.46  | 20 | 20 | 2.53E-07 | 0.709  | 0.927 | v5.3          | KKI |
| SUM_insula_surfavg               | ICC2 | 0.447 | 10.81  | 20 | 20 | 8.55E-07 | -0.056 | 0.761 | v5.3 vs. v6.0 | KKI |
| SUM_insula_surfavg               | ICC2 | 0.416 | 8.95   | 20 | 20 | 4.13E-06 | -0.060 | 0.736 | v5.3 vs. v7.1 | KKI |
| SUM_insula_surfavg               | ICC3 | 0.907 | 20.61  | 20 | 20 | 2.83E-09 | 0.813  | 0.955 | v6.0          | KKI |
| SUM_insula_surfavg               | ICC2 | 0.846 | 11.87  | 20 | 20 | 3.83E-07 | 0.702  | 0.924 | v6.0 vs. v7.1 | KKI |
| SUM_insula_surfavg               | ICC3 | 0.906 | 20.29  | 20 | 20 | 3.26E-09 | 0.810  | 0.955 | v7.1          | KKI |
| SUM_isthmuscingulate_surfavg     | ICC3 | 0.963 | 52.68  | 20 | 20 | 3.99E-13 | 0.922  | 0.982 | v5.3          | KKI |
| SUM_isthmuscingulate_surfavg     | ICC2 | 0.870 | 13.97  | 20 | 20 | 9.34E-08 | 0.744  | 0.937 | v5.3 vs. v6.0 | KKI |
| SUM_isthmuscingulate_surfavg     | ICC2 | 0.849 | 12.93  | 20 | 20 | 1.83E-07 | 0.707  | 0.926 | v5.3 vs. v7.1 | KKI |
| SUM_isthmuscingulate_surfavg     | ICC3 | 0.992 | 250.77 | 20 | 20 | 8.74E-20 | 0.983  | 0.996 | v6.0          | KKI |
| SUM_isthmuscingulate_surfavg     | ICC2 | 0.984 | 182.75 | 20 | 20 | 2.01E-18 | 0.942  | 0.994 | v6.0 vs. v7.1 | KKI |
| SUM_isthmuscingulate_surfavg     | ICC3 | 0.992 | 237.92 | 20 | 20 | 1.47E-19 | 0.982  | 0.996 | v7.1          | KKI |
| SUM_lateraloccipital_surfavg     | ICC3 | 0.980 | 98.95  | 20 | 20 | 8.55E-16 | 0.958  | 0.991 | v5.3          | KKI |
| SUM_lateraloccipital_surfavg     | ICC2 | 0.870 | 84.40  | 20 | 20 | 4.07E-15 | 0.044  | 0.963 | v5.3 vs. v6.0 | KKI |
| SUM_lateraloccipital_surfavg     | ICC2 | 0.836 | 68.19  | 20 | 20 | 3.26E-14 | 0.017  | 0.953 | v5.3 vs. v7.1 | KKI |
| SUM_lateraloccipital_surfavg     | ICC3 | 0.995 | 440.05 | 20 | 20 | 3.26E-22 | 0.990  | 0.998 | v6.0          | KKI |
| SUM_lateraloccipital_surfavg     | ICC2 | 0.994 | 640.66 | 20 | 20 | 7.71E-24 | 0.968  | 0.998 | v6.0 vs. v7.1 | KKI |
| SUM_lateraloccipital_surfavg     | ICC3 | 0.996 | 480.91 | 20 | 20 | 1.34E-22 | 0.991  | 0.998 | v7.1          | KKI |
| SUM_lateralorbitofrontal_surfavg | ICC3 | 0.974 | 75.97  | 20 | 20 | 1.14E-14 | 0.946  | 0.988 | v5.3          | KKI |

|                                  |      |       |        |    |    |          |        |       |               |     |
|----------------------------------|------|-------|--------|----|----|----------|--------|-------|---------------|-----|
| SUM_lateralorbitofrontal_surfavg | ICC2 | 0.911 | 110.35 | 20 | 20 | 2.93E-16 | 0.124  | 0.975 | v5.3 vs. v6.0 | KKI |
| SUM_lateralorbitofrontal_surfavg | ICC2 | 0.793 | 62.76  | 20 | 20 | 7.32E-14 | -0.006 | 0.939 | v5.3 vs. v7.1 | KKI |
| SUM_lateralorbitofrontal_surfavg | ICC3 | 0.975 | 78.72  | 20 | 20 | 8.04E-15 | 0.947  | 0.988 | v6.0          | KKI |
| SUM_lateralorbitofrontal_surfavg | ICC2 | 0.941 | 74.99  | 20 | 20 | 1.29E-14 | 0.611  | 0.981 | v6.0 vs. v7.1 | KKI |
| SUM_lateralorbitofrontal_surfavg | ICC3 | 0.968 | 60.64  | 20 | 20 | 1.02E-13 | 0.932  | 0.985 | v7.1          | KKI |
| SUM_lingual_surfavg              | ICC3 | 0.973 | 73.26  | 20 | 20 | 1.62E-14 | 0.944  | 0.987 | v5.3          | KKI |
| SUM_lingual_surfavg              | ICC2 | 0.922 | 26.65  | 20 | 20 | 2.62E-10 | 0.841  | 0.963 | v5.3 vs. v6.0 | KKI |
| SUM_lingual_surfavg              | ICC2 | 0.909 | 27.01  | 20 | 20 | 2.31E-10 | 0.775  | 0.960 | v5.3 vs. v7.1 | KKI |
| SUM_lingual_surfavg              | ICC3 | 0.990 | 190.62 | 20 | 20 | 1.33E-18 | 0.978  | 0.995 | v6.0          | KKI |
| SUM_lingual_surfavg              | ICC2 | 0.993 | 492.99 | 20 | 20 | 1.05E-22 | 0.960  | 0.997 | v6.0 vs. v7.1 | KKI |
| SUM_lingual_surfavg              | ICC3 | 0.996 | 490.26 | 20 | 20 | 1.11E-22 | 0.991  | 0.998 | v7.1          | KKI |
| SUM_medialorbitofrontal_surfavg  | ICC3 | 0.876 | 15.08  | 20 | 20 | 4.74E-08 | 0.753  | 0.939 | v5.3          | KKI |
| SUM_medialorbitofrontal_surfavg  | ICC2 | 0.537 | 8.43   | 20 | 20 | 6.67E-06 | -0.043 | 0.804 | v5.3 vs. v6.0 | KKI |
| SUM_medialorbitofrontal_surfavg  | ICC2 | 0.395 | 10.40  | 20 | 20 | 1.18E-06 | -0.051 | 0.724 | v5.3 vs. v7.1 | KKI |
| SUM_medialorbitofrontal_surfavg  | ICC3 | 0.943 | 34.35  | 20 | 20 | 2.40E-11 | 0.884  | 0.973 | v6.0          | KKI |
| SUM_medialorbitofrontal_surfavg  | ICC2 | 0.776 | 17.61  | 20 | 20 | 1.18E-08 | 0.178  | 0.918 | v6.0 vs. v7.1 | KKI |
| SUM_medialorbitofrontal_surfavg  | ICC3 | 0.917 | 23.07  | 20 | 20 | 9.99E-10 | 0.831  | 0.960 | v7.1          | KKI |
| SUM_middletemporal_surfavg       | ICC3 | 0.989 | 173.34 | 20 | 20 | 3.40E-18 | 0.976  | 0.995 | v5.3          | KKI |
| SUM_middletemporal_surfavg       | ICC2 | 0.960 | 100.35 | 20 | 20 | 7.45E-16 | 0.750  | 0.986 | v5.3 vs. v6.0 | KKI |
| SUM_middletemporal_surfavg       | ICC2 | 0.920 | 138.75 | 20 | 20 | 3.07E-17 | 0.122  | 0.978 | v5.3 vs. v7.1 | KKI |
| SUM_middletemporal_surfavg       | ICC3 | 0.990 | 202.02 | 20 | 20 | 7.46E-19 | 0.979  | 0.995 | v6.0          | KKI |
| SUM_middletemporal_surfavg       | ICC2 | 0.980 | 363.02 | 20 | 20 | 2.21E-21 | 0.649  | 0.994 | v6.0 vs. v7.1 | KKI |
| SUM_middletemporal_surfavg       | ICC3 | 0.996 | 518.17 | 20 | 20 | 6.39E-23 | 0.992  | 0.998 | v7.1          | KKI |
| SUM_paracentral_surfavg          | ICC3 | 0.798 | 8.88   | 20 | 20 | 4.38E-06 | 0.614  | 0.899 | v5.3          | KKI |
| SUM_paracentral_surfavg          | ICC2 | 0.876 | 15.87  | 20 | 20 | 3.01E-08 | 0.755  | 0.939 | v5.3 vs. v6.0 | KKI |
| SUM_paracentral_surfavg          | ICC2 | 0.769 | 8.58   | 20 | 20 | 5.82E-06 | 0.558  | 0.885 | v5.3 vs. v7.1 | KKI |
| SUM_paracentral_surfavg          | ICC3 | 0.981 | 105.38 | 20 | 20 | 4.61E-16 | 0.960  | 0.991 | v6.0          | KKI |
| SUM_paracentral_surfavg          | ICC2 | 0.953 | 48.42  | 20 | 20 | 8.99E-13 | 0.895  | 0.978 | v6.0 vs. v7.1 | KKI |
| SUM_paracentral_surfavg          | ICC3 | 0.964 | 55.15  | 20 | 20 | 2.56E-13 | 0.926  | 0.983 | v7.1          | KKI |
| SUM parahippocampal_surfavg      | ICC3 | 0.922 | 24.65  | 20 | 20 | 5.43E-10 | 0.841  | 0.963 | v5.3          | KKI |
| SUM parahippocampal_surfavg      | ICC2 | 0.662 | 7.38   | 20 | 20 | 1.94E-05 | 0.247  | 0.845 | v5.3 vs. v6.0 | KKI |
| SUM parahippocampal_surfavg      | ICC2 | 0.592 | 5.19   | 20 | 20 | 2.71E-04 | 0.227  | 0.795 | v5.3 vs. v7.1 | KKI |
| SUM parahippocampal_surfavg      | ICC3 | 0.868 | 14.13  | 20 | 20 | 8.43E-08 | 0.739  | 0.936 | v6.0          | KKI |
| SUM parahippocampal_surfavg      | ICC2 | 0.878 | 14.66  | 20 | 20 | 6.07E-08 | 0.756  | 0.941 | v6.0 vs. v7.1 | KKI |
| SUM parahippocampal_surfavg      | ICC3 | 0.895 | 18.05  | 20 | 20 | 9.46E-09 | 0.789  | 0.949 | v7.1          | KKI |
| SUM_parsopercularis_surfavg      | ICC3 | 0.989 | 175.72 | 20 | 20 | 2.97E-18 | 0.976  | 0.995 | v5.3          | KKI |
| SUM_parsopercularis_surfavg      | ICC2 | 0.919 | 31.86  | 20 | 20 | 4.88E-11 | 0.783  | 0.965 | v5.3 vs. v6.0 | KKI |
| SUM_parsopercularis_surfavg      | ICC2 | 0.822 | 10.22  | 20 | 20 | 1.37E-06 | 0.660  | 0.912 | v5.3 vs. v7.1 | KKI |
| SUM_parsopercularis_surfavg      | ICC3 | 0.991 | 223.23 | 20 | 20 | 2.77E-19 | 0.981  | 0.996 | v6.0          | KKI |
| SUM_parsopercularis_surfavg      | ICC2 | 0.935 | 29.90  | 20 | 20 | 8.90E-11 | 0.869  | 0.969 | v6.0 vs. v7.1 | KKI |
| SUM_parsopercularis_surfavg      | ICC3 | 0.964 | 54.54  | 20 | 20 | 2.85E-13 | 0.925  | 0.983 | v7.1          | KKI |
| SUM_parsorbitalis_surfavg        | ICC3 | 0.956 | 44.11  | 20 | 20 | 2.20E-12 | 0.908  | 0.979 | v5.3          | KKI |
| SUM_parsorbitalis_surfavg        | ICC2 | 0.706 | 32.08  | 20 | 20 | 4.58E-11 | -0.027 | 0.904 | v5.3 vs. v6.0 | KKI |
| SUM_parsorbitalis_surfavg        | ICC2 | 0.593 | 25.40  | 20 | 20 | 4.10E-10 | -0.036 | 0.855 | v5.3 vs. v7.1 | KKI |

|                                      |      |       |        |    |    |          |       |       |               |     |
|--------------------------------------|------|-------|--------|----|----|----------|-------|-------|---------------|-----|
| SUM_parsorbitalis_surfavg            | ICC3 | 0.977 | 87.15  | 20 | 20 | 2.97E-15 | 0.952 | 0.989 | v6.0          | KKI |
| SUM_parsorbitalis_surfavg            | ICC2 | 0.951 | 114.45 | 20 | 20 | 2.05E-16 | 0.529 | 0.985 | v6.0 vs. v7.1 | KKI |
| SUM_parsorbitalis_surfavg            | ICC3 | 0.989 | 176.46 | 20 | 20 | 2.85E-18 | 0.976 | 0.995 | v7.1          | KKI |
| SUM_parstriangularis_surfavg         | ICC3 | 0.987 | 158.54 | 20 | 20 | 8.21E-18 | 0.974 | 0.994 | v5.3          | KKI |
| SUM_parstriangularis_surfavg         | ICC2 | 0.865 | 18.57  | 20 | 20 | 7.31E-09 | 0.665 | 0.940 | v5.3 vs. v6.0 | KKI |
| SUM_parstriangularis_surfavg         | ICC2 | 0.787 | 12.34  | 20 | 20 | 2.75E-07 | 0.456 | 0.907 | v5.3 vs. v7.1 | KKI |
| SUM_parstriangularis_surfavg         | ICC3 | 0.993 | 288.04 | 20 | 20 | 2.21E-20 | 0.985 | 0.997 | v6.0          | KKI |
| SUM_parstriangularis_surfavg         | ICC2 | 0.980 | 153.46 | 20 | 20 | 1.13E-17 | 0.923 | 0.992 | v6.0 vs. v7.1 | KKI |
| SUM_parstriangularis_surfavg         | ICC3 | 0.958 | 46.87  | 20 | 20 | 1.23E-12 | 0.913 | 0.980 | v7.1          | KKI |
| SUM_pericalcarine_surfavg            | ICC3 | 0.982 | 112.16 | 20 | 20 | 2.49E-16 | 0.963 | 0.992 | v5.3          | KKI |
| SUM_pericalcarine_surfavg            | ICC2 | 0.947 | 50.80  | 20 | 20 | 5.66E-13 | 0.847 | 0.978 | v5.3 vs. v6.0 | KKI |
| SUM_pericalcarine_surfavg            | ICC2 | 0.950 | 53.29  | 20 | 20 | 3.57E-13 | 0.858 | 0.979 | v5.3 vs. v7.1 | KKI |
| SUM_pericalcarine_surfavg            | ICC3 | 0.990 | 193.69 | 20 | 20 | 1.13E-18 | 0.978 | 0.995 | v6.0          | KKI |
| SUM_pericalcarine_surfavg            | ICC2 | 0.994 | 318.55 | 20 | 20 | 8.11E-21 | 0.987 | 0.997 | v6.0 vs. v7.1 | KKI |
| SUM_pericalcarine_surfavg            | ICC3 | 0.993 | 270.48 | 20 | 20 | 4.12E-20 | 0.984 | 0.997 | v7.1          | KKI |
| SUM_postcentral_surfavg              | ICC3 | 0.879 | 15.52  | 20 | 20 | 3.67E-08 | 0.759 | 0.941 | v5.3          | KKI |
| SUM_postcentral_surfavg              | ICC2 | 0.861 | 13.15  | 20 | 20 | 1.58E-07 | 0.729 | 0.932 | v5.3 vs. v6.0 | KKI |
| SUM_postcentral_surfavg              | ICC2 | 0.972 | 67.85  | 20 | 20 | 3.43E-14 | 0.942 | 0.987 | v5.3 vs. v7.1 | KKI |
| SUM_postcentral_surfavg              | ICC3 | 0.819 | 10.07  | 20 | 20 | 1.56E-06 | 0.651 | 0.911 | v6.0          | KKI |
| SUM_postcentral_surfavg              | ICC2 | 0.843 | 11.43  | 20 | 20 | 5.29E-07 | 0.695 | 0.923 | v6.0 vs. v7.1 | KKI |
| SUM_postcentral_surfavg              | ICC3 | 0.822 | 10.24  | 20 | 20 | 1.35E-06 | 0.656 | 0.912 | v7.1          | KKI |
| SUM_posteriorcingulate_surfavg       | ICC3 | 0.968 | 61.62  | 20 | 20 | 8.73E-14 | 0.933 | 0.985 | v5.3          | KKI |
| SUM_posteriorcingulate_surfavg       | ICC2 | 0.884 | 15.70  | 20 | 20 | 3.31E-08 | 0.769 | 0.944 | v5.3 vs. v6.0 | KKI |
| SUM_posteriorcingulate_surfavg       | ICC2 | 0.880 | 15.35  | 20 | 20 | 4.04E-08 | 0.763 | 0.941 | v5.3 vs. v7.1 | KKI |
| SUM_posteriorcingulate_surfavg       | ICC3 | 0.992 | 249.01 | 20 | 20 | 9.37E-20 | 0.983 | 0.996 | v6.0          | KKI |
| SUM_posteriorcingulate_surfavg       | ICC2 | 0.977 | 139.52 | 20 | 20 | 2.90E-17 | 0.907 | 0.991 | v6.0 vs. v7.1 | KKI |
| SUM_posteriorcingulate_surfavg       | ICC3 | 0.991 | 219.96 | 20 | 20 | 3.21E-19 | 0.981 | 0.996 | v7.1          | KKI |
| SUM_precentral_surfavg               | ICC3 | 0.913 | 21.93  | 20 | 20 | 1.60E-09 | 0.823 | 0.958 | v5.3          | KKI |
| SUM_precentral_surfavg               | ICC2 | 0.915 | 22.16  | 20 | 20 | 1.45E-09 | 0.830 | 0.959 | v5.3 vs. v6.0 | KKI |
| SUM_precentral_surfavg               | ICC2 | 0.702 | 5.79   | 20 | 20 | 1.23E-04 | 0.465 | 0.847 | v5.3 vs. v7.1 | KKI |
| SUM_precentral_surfavg               | ICC3 | 0.995 | 390.13 | 20 | 20 | 1.08E-21 | 0.989 | 0.998 | v6.0          | KKI |
| SUM_precentral_surfavg               | ICC2 | 0.911 | 22.77  | 20 | 20 | 1.13E-09 | 0.821 | 0.957 | v6.0 vs. v7.1 | KKI |
| SUM_precentral_surfavg               | ICC3 | 0.905 | 20.01  | 20 | 20 | 3.70E-09 | 0.808 | 0.954 | v7.1          | KKI |
| SUM_precuneus_surfavg                | ICC3 | 0.991 | 232.03 | 20 | 20 | 1.89E-19 | 0.982 | 0.996 | v5.3          | KKI |
| SUM_precuneus_surfavg                | ICC2 | 0.963 | 50.53  | 20 | 20 | 5.96E-13 | 0.923 | 0.982 | v5.3 vs. v6.0 | KKI |
| SUM_precuneus_surfavg                | ICC2 | 0.959 | 45.87  | 20 | 20 | 1.52E-12 | 0.915 | 0.981 | v5.3 vs. v7.1 | KKI |
| SUM_precuneus_surfavg                | ICC3 | 0.996 | 452.28 | 20 | 20 | 2.48E-22 | 0.991 | 0.998 | v6.0          | KKI |
| SUM_precuneus_surfavg                | ICC2 | 0.997 | 570.11 | 20 | 20 | 2.47E-23 | 0.993 | 0.998 | v6.0 vs. v7.1 | KKI |
| SUM_precuneus_surfavg                | ICC3 | 0.996 | 472.40 | 20 | 20 | 1.61E-22 | 0.991 | 0.998 | v7.1          | KKI |
| SUM_rostralanteriorcingulate_surfavg | ICC3 | 0.920 | 23.99  | 20 | 20 | 6.98E-10 | 0.837 | 0.962 | v5.3          | KKI |
| SUM_rostralanteriorcingulate_surfavg | ICC2 | 0.755 | 16.03  | 20 | 20 | 2.76E-08 | 0.147 | 0.909 | v5.3 vs. v6.0 | KKI |
| SUM_rostralanteriorcingulate_surfavg | ICC2 | 0.815 | 11.94  | 20 | 20 | 3.64E-07 | 0.609 | 0.912 | v5.3 vs. v7.1 | KKI |
| SUM_rostralanteriorcingulate_surfavg | ICC3 | 0.961 | 50.05  | 20 | 20 | 6.54E-13 | 0.919 | 0.981 | v6.0          | KKI |
| SUM_rostralanteriorcingulate_surfavg | ICC2 | 0.927 | 73.38  | 20 | 20 | 1.60E-14 | 0.417 | 0.977 | v6.0 vs. v7.1 | KKI |



|                                      |      |       |         |    |    |          |        |       |               |     |
|--------------------------------------|------|-------|---------|----|----|----------|--------|-------|---------------|-----|
| SUM_rostralanteriorcingulate_surfavg | ICC3 | 0.960 | 48.77   | 20 | 20 | 8.39E-13 | 0.917  | 0.981 | v7.1          | KKI |
| SUM_rostralmiddlefrontal_surfavg     | ICC3 | 0.974 | 74.97   | 20 | 20 | 1.29E-14 | 0.945  | 0.988 | v5.3          | KKI |
| SUM_rostralmiddlefrontal_surfavg     | ICC2 | 0.953 | 46.10   | 20 | 20 | 1.44E-12 | 0.898  | 0.978 | v5.3 vs. v6.0 | KKI |
| SUM_rostralmiddlefrontal_surfavg     | ICC2 | 0.867 | 14.92   | 20 | 20 | 5.22E-08 | 0.737  | 0.935 | v5.3 vs. v7.1 | KKI |
| SUM_rostralmiddlefrontal_surfavg     | ICC3 | 0.990 | 204.65  | 20 | 20 | 6.56E-19 | 0.979  | 0.995 | v6.0          | KKI |
| SUM_rostralmiddlefrontal_surfavg     | ICC2 | 0.965 | 55.17   | 20 | 20 | 2.55E-13 | 0.927  | 0.983 | v6.0 vs. v7.1 | KKI |
| SUM_rostralmiddlefrontal_surfavg     | ICC3 | 0.949 | 38.42   | 20 | 20 | 8.27E-12 | 0.895  | 0.976 | v7.1          | KKI |
| SUM_superiorfrontal_surfavg          | ICC3 | 0.990 | 196.45  | 20 | 20 | 9.84E-19 | 0.979  | 0.995 | v5.3          | KKI |
| SUM_superiorfrontal_surfavg          | ICC2 | 0.950 | 104.28  | 20 | 20 | 5.11E-16 | 0.566  | 0.985 | v5.3 vs. v6.0 | KKI |
| SUM_superiorfrontal_surfavg          | ICC2 | 0.868 | 31.27   | 20 | 20 | 5.84E-11 | 0.364  | 0.954 | v5.3 vs. v7.1 | KKI |
| SUM_superiorfrontal_surfavg          | ICC3 | 0.979 | 92.73   | 20 | 20 | 1.62E-15 | 0.955  | 0.990 | v6.0          | KKI |
| SUM_superiorfrontal_surfavg          | ICC2 | 0.967 | 84.21   | 20 | 20 | 4.16E-15 | 0.895  | 0.986 | v6.0 vs. v7.1 | KKI |
| SUM_superiorfrontal_surfavg          | ICC3 | 0.979 | 95.52   | 20 | 20 | 1.21E-15 | 0.956  | 0.990 | v7.1          | KKI |
| SUM_superiorparietal_surfavg         | ICC3 | 0.960 | 49.59   | 20 | 20 | 7.14E-13 | 0.918  | 0.981 | v5.3          | KKI |
| SUM_superiorparietal_surfavg         | ICC2 | 0.961 | 52.34   | 20 | 20 | 4.24E-13 | 0.921  | 0.982 | v5.3 vs. v6.0 | KKI |
| SUM_superiorparietal_surfavg         | ICC2 | 0.966 | 58.92   | 20 | 20 | 1.35E-13 | 0.929  | 0.984 | v5.3 vs. v7.1 | KKI |
| SUM_superiorparietal_surfavg         | ICC3 | 0.990 | 191.19  | 20 | 20 | 1.29E-18 | 0.978  | 0.995 | v6.0          | KKI |
| SUM_superiorparietal_surfavg         | ICC2 | 0.998 | 944.15  | 20 | 20 | 1.61E-25 | 0.996  | 0.999 | v6.0 vs. v7.1 | KKI |
| SUM_superiorparietal_surfavg         | ICC3 | 0.992 | 256.26  | 20 | 20 | 7.05E-20 | 0.984  | 0.996 | v7.1          | KKI |
| SUM_superiortemporal_surfavg         | ICC3 | 0.991 | 211.40  | 20 | 20 | 4.76E-19 | 0.980  | 0.996 | v5.3          | KKI |
| SUM_superiortemporal_surfavg         | ICC2 | 0.873 | 104.28  | 20 | 20 | 5.11E-16 | 0.035  | 0.965 | v5.3 vs. v6.0 | KKI |
| SUM_superiortemporal_surfavg         | ICC2 | 0.813 | 117.35  | 20 | 20 | 1.60E-16 | 0.002  | 0.948 | v5.3 vs. v7.1 | KKI |
| SUM_superiortemporal_surfavg         | ICC3 | 0.992 | 253.82  | 20 | 20 | 7.75E-20 | 0.983  | 0.996 | v6.0          | KKI |
| SUM_superiortemporal_surfavg         | ICC2 | 0.985 | 371.44  | 20 | 20 | 1.76E-21 | 0.799  | 0.995 | v6.0 vs. v7.1 | KKI |
| SUM_superiortemporal_surfavg         | ICC3 | 0.996 | 467.49  | 20 | 20 | 1.78E-22 | 0.991  | 0.998 | v7.1          | KKI |
| SUM_supramarginal_surfavg            | ICC3 | 0.971 | 68.87   | 20 | 20 | 2.96E-14 | 0.940  | 0.986 | v5.3          | KKI |
| SUM_supramarginal_surfavg            | ICC2 | 0.952 | 43.70   | 20 | 20 | 2.41E-12 | 0.900  | 0.977 | v5.3 vs. v6.0 | KKI |
| SUM_supramarginal_surfavg            | ICC2 | 0.925 | 29.69   | 20 | 20 | 9.50E-11 | 0.835  | 0.965 | v5.3 vs. v7.1 | KKI |
| SUM_supramarginal_surfavg            | ICC3 | 0.976 | 81.78   | 20 | 20 | 5.54E-15 | 0.949  | 0.989 | v6.0          | KKI |
| SUM_supramarginal_surfavg            | ICC2 | 0.990 | 227.73  | 20 | 20 | 2.27E-19 | 0.976  | 0.995 | v6.0 vs. v7.1 | KKI |
| SUM_supramarginal_surfavg            | ICC3 | 0.987 | 148.38  | 20 | 20 | 1.58E-17 | 0.972  | 0.994 | v7.1          | KKI |
| SUM_SurfArea                         | ICC3 | 0.996 | 537.49  | 20 | 20 | 4.44E-23 | 0.992  | 0.998 | v5.3          | KKI |
| SUM_SurfArea                         | ICC2 | 0.982 | 1380.71 | 20 | 20 | 3.62E-27 | 0.310  | 0.996 | v5.3 vs. v6.0 | KKI |
| SUM_SurfArea                         | ICC2 | 0.954 | 770.02  | 20 | 20 | 1.23E-24 | 0.105  | 0.989 | v5.3 vs. v7.1 | KKI |
| SUM_SurfArea                         | ICC3 | 0.996 | 531.89  | 20 | 20 | 4.93E-23 | 0.992  | 0.998 | v6.0          | KKI |
| SUM_SurfArea                         | ICC2 | 0.992 | 2632.76 | 20 | 20 | 5.73E-30 | 0.541  | 0.998 | v6.0 vs. v7.1 | KKI |
| SUM_SurfArea                         | ICC3 | 0.997 | 595.60  | 20 | 20 | 1.60E-23 | 0.993  | 0.998 | v7.1          | KKI |
| SUM_temporalpole_surfavg             | ICC3 | 0.749 | 6.97    | 20 | 20 | 3.03E-05 | 0.533  | 0.873 | v5.3          | KKI |
| SUM_temporalpole_surfavg             | ICC2 | 0.446 | 5.20    | 20 | 20 | 2.68E-04 | -0.040 | 0.733 | v5.3 vs. v6.0 | KKI |
| SUM_temporalpole_surfavg             | ICC2 | 0.287 | 4.73    | 20 | 20 | 5.15E-04 | -0.070 | 0.609 | v5.3 vs. v7.1 | KKI |
| SUM_temporalpole_surfavg             | ICC3 | 0.905 | 19.96   | 20 | 20 | 3.80E-09 | 0.808  | 0.954 | v6.0          | KKI |
| SUM_temporalpole_surfavg             | ICC2 | 0.700 | 12.91   | 20 | 20 | 1.85E-07 | 0.077  | 0.885 | v6.0 vs. v7.1 | KKI |
| SUM_temporalpole_surfavg             | ICC3 | 0.895 | 18.00   | 20 | 20 | 9.71E-09 | 0.789  | 0.949 | v7.1          | KKI |
| SUM_transversetemporal_surfavg       | ICC3 | 0.949 | 38.27   | 20 | 20 | 8.59E-12 | 0.895  | 0.976 | v5.3          | KKI |

|                              |      |       |       |    |    |          |       |       |               |     |
|------------------------------|------|-------|-------|----|----|----------|-------|-------|---------------|-----|
| SUM_transversetemporal_surfg | ICC2 | 0.893 | 27.94 | 20 | 20 | 1.68E-10 | 0.648 | 0.957 | v5.3 vs. v6.0 | KKI |
| SUM_transversetemporal_surfg | ICC2 | 0.876 | 18.20 | 20 | 20 | 8.77E-09 | 0.729 | 0.942 | v5.3 vs. v7.1 | KKI |
| SUM_transversetemporal_surfg | ICC3 | 0.964 | 54.68 | 20 | 20 | 2.78E-13 | 0.925 | 0.983 | v6.0          | KKI |
| SUM_transversetemporal_surfg | ICC2 | 0.959 | 50.20 | 20 | 20 | 6.35E-13 | 0.915 | 0.980 | v6.0 vs. v7.1 | KKI |
| SUM_transversetemporal_surfg | ICC3 | 0.963 | 53.38 | 20 | 20 | 3.51E-13 | 0.923 | 0.983 | v7.1          | KKI |

**Table S5. OASIS specific ICCs and associated statistics.**

| ROI                                  | Type | ICC   | F      | df1 | df2 | p        | lower bound | upper bound | comparison    | dataset |
|--------------------------------------|------|-------|--------|-----|-----|----------|-------------|-------------|---------------|---------|
| AVG_Accumbens                        | ICC3 | 0.898 | 18.56  | 19  | 19  | 1.71E-08 | 0.791       | 0.952       | v5.3          | OASIS   |
| AVG_Accumbens                        | ICC2 | 0.770 | 14.61  | 19  | 19  | 1.32E-07 | 0.254       | 0.911       | v5.3 vs. v6.0 | OASIS   |
| AVG_Accumbens                        | ICC2 | 0.730 | 14.18  | 19  | 19  | 1.69E-07 | 0.117       | 0.899       | v5.3 vs. v7.1 | OASIS   |
| AVG_Accumbens                        | ICC3 | 0.935 | 29.87  | 19  | 19  | 2.60E-10 | 0.865       | 0.970       | v6.0          | OASIS   |
| AVG_Accumbens                        | ICC2 | 0.950 | 41.25  | 19  | 19  | 1.41E-11 | 0.895       | 0.977       | v6.0 vs. v7.1 | OASIS   |
| AVG_Accumbens                        | ICC3 | 0.936 | 30.06  | 19  | 19  | 2.46E-10 | 0.865       | 0.970       | v7.1          | OASIS   |
| AVG_Amygdala                         | ICC3 | 0.876 | 15.14  | 19  | 19  | 9.72E-08 | 0.749       | 0.941       | v5.3          | OASIS   |
| AVG_Amygdala                         | ICC2 | 0.941 | 40.23  | 19  | 19  | 1.77E-11 | 0.859       | 0.974       | v5.3 vs. v6.0 | OASIS   |
| AVG_Amygdala                         | ICC2 | 0.911 | 20.46  | 19  | 19  | 7.36E-09 | 0.816       | 0.958       | v5.3 vs. v7.1 | OASIS   |
| AVG_Amygdala                         | ICC3 | 0.904 | 19.84  | 19  | 19  | 9.58E-09 | 0.803       | 0.955       | v6.0          | OASIS   |
| AVG_Amygdala                         | ICC2 | 0.943 | 37.45  | 19  | 19  | 3.39E-11 | 0.878       | 0.974       | v6.0 vs. v7.1 | OASIS   |
| AVG_Amygdala                         | ICC3 | 0.910 | 21.12  | 19  | 19  | 5.57E-09 | 0.814       | 0.957       | v7.1          | OASIS   |
| AVG_bankssts_thickavg                | ICC3 | 0.787 | 8.38   | 19  | 19  | 1.17E-05 | 0.589       | 0.896       | v5.3          | OASIS   |
| AVG_bankssts_thickavg                | ICC2 | 0.870 | 16.57  | 19  | 19  | 4.53E-08 | 0.725       | 0.939       | v5.3 vs. v6.0 | OASIS   |
| AVG_bankssts_thickavg                | ICC2 | 0.879 | 14.83  | 19  | 19  | 1.16E-07 | 0.754       | 0.943       | v5.3 vs. v7.1 | OASIS   |
| AVG_bankssts_thickavg                | ICC3 | 0.835 | 11.10  | 19  | 19  | 1.27E-06 | 0.673       | 0.920       | v6.0          | OASIS   |
| AVG_bankssts_thickavg                | ICC2 | 0.888 | 21.53  | 19  | 19  | 4.70E-09 | 0.730       | 0.950       | v6.0 vs. v7.1 | OASIS   |
| AVG_bankssts_thickavg                | ICC3 | 0.970 | 65.16  | 19  | 19  | 2.13E-13 | 0.936       | 0.986       | v7.1          | OASIS   |
| AVG_caudalanteriorcingulate_thickavg | ICC3 | 0.680 | 5.25   | 19  | 19  | 3.49E-04 | 0.415       | 0.838       | v5.3          | OASIS   |
| AVG_caudalanteriorcingulate_thickavg | ICC2 | 0.817 | 9.49   | 19  | 19  | 4.43E-06 | 0.640       | 0.912       | v5.3 vs. v6.0 | OASIS   |
| AVG_caudalanteriorcingulate_thickavg | ICC2 | 0.483 | 14.99  | 19  | 19  | 1.06E-07 | -0.046      | 0.791       | v5.3 vs. v7.1 | OASIS   |
| AVG_caudalanteriorcingulate_thickavg | ICC3 | 0.841 | 11.54  | 19  | 19  | 9.25E-07 | 0.684       | 0.923       | v6.0          | OASIS   |
| AVG_caudalanteriorcingulate_thickavg | ICC2 | 0.454 | 7.12   | 19  | 19  | 4.01E-05 | -0.064      | 0.755       | v6.0 vs. v7.1 | OASIS   |
| AVG_caudalanteriorcingulate_thickavg | ICC3 | 0.817 | 9.94   | 19  | 19  | 3.07E-06 | 0.642       | 0.911       | v7.1          | OASIS   |
| AVG_caudalmiddlefrontal_thickavg     | ICC3 | 0.860 | 13.24  | 19  | 19  | 2.98E-07 | 0.719       | 0.933       | v5.3          | OASIS   |
| AVG_caudalmiddlefrontal_thickavg     | ICC2 | 0.851 | 33.76  | 19  | 19  | 8.66E-11 | 0.206       | 0.952       | v5.3 vs. v6.0 | OASIS   |
| AVG_caudalmiddlefrontal_thickavg     | ICC2 | 0.816 | 20.78  | 19  | 19  | 6.42E-09 | 0.275       | 0.934       | v5.3 vs. v7.1 | OASIS   |
| AVG_caudalmiddlefrontal_thickavg     | ICC3 | 0.844 | 11.86  | 19  | 19  | 7.40E-07 | 0.691       | 0.925       | v6.0          | OASIS   |
| AVG_caudalmiddlefrontal_thickavg     | ICC2 | 0.956 | 42.38  | 19  | 19  | 1.11E-11 | 0.907       | 0.979       | v6.0 vs. v7.1 | OASIS   |
| AVG_caudalmiddlefrontal_thickavg     | ICC3 | 0.828 | 10.61  | 19  | 19  | 1.82E-06 | 0.661       | 0.917       | v7.1          | OASIS   |
| AVG_Caudate                          | ICC3 | 0.978 | 91.15  | 19  | 19  | 9.46E-15 | 0.954       | 0.990       | v5.3          | OASIS   |
| AVG_Caudate                          | ICC2 | 0.921 | 96.18  | 19  | 19  | 5.74E-15 | 0.221       | 0.977       | v5.3 vs. v6.0 | OASIS   |
| AVG_Caudate                          | ICC2 | 0.977 | 115.46 | 19  | 19  | 1.04E-15 | 0.932       | 0.990       | v5.3 vs. v7.1 | OASIS   |
| AVG_Caudate                          | ICC3 | 0.982 | 109.90 | 19  | 19  | 1.65E-15 | 0.961       | 0.992       | v6.0          | OASIS   |
| AVG_Caudate                          | ICC2 | 0.962 | 209.01 | 19  | 19  | 3.96E-18 | 0.425       | 0.990       | v6.0 vs. v7.1 | OASIS   |
| AVG_Caudate                          | ICC3 | 0.992 | 250.80 | 19  | 19  | 7.11E-19 | 0.983       | 0.996       | v7.1          | OASIS   |
| AVG_cuneus_thickavg                  | ICC3 | 0.947 | 36.59  | 19  | 19  | 4.19E-11 | 0.888       | 0.975       | v5.3          | OASIS   |
| AVG_cuneus_thickavg                  | ICC2 | 0.896 | 54.58  | 19  | 19  | 1.09E-12 | 0.267       | 0.968       | v5.3 vs. v6.0 | OASIS   |
| AVG_cuneus_thickavg                  | ICC2 | 0.914 | 22.30  | 19  | 19  | 3.47E-09 | 0.825       | 0.959       | v5.3 vs. v7.1 | OASIS   |
| AVG_cuneus_thickavg                  | ICC3 | 0.951 | 39.67  | 19  | 19  | 2.01E-11 | 0.896       | 0.977       | v6.0          | OASIS   |
| AVG_cuneus_thickavg                  | ICC2 | 0.901 | 37.78  | 19  | 19  | 3.14E-11 | 0.537       | 0.965       | v6.0 vs. v7.1 | OASIS   |

|                               |      |       |        |    |    |          |        |       |               |       |
|-------------------------------|------|-------|--------|----|----|----------|--------|-------|---------------|-------|
| AVG_cuneus_thickavg           | ICC3 | 0.969 | 63.49  | 19 | 19 | 2.71E-13 | 0.934  | 0.986 | v7.1          | OASIS |
| AVG_entorhinal_thickavg       | ICC3 | 0.888 | 16.89  | 19 | 19 | 3.84E-08 | 0.772  | 0.947 | v5.3          | OASIS |
| AVG_entorhinal_thickavg       | ICC2 | 0.804 | 13.66  | 19 | 19 | 2.31E-07 | 0.482  | 0.917 | v5.3 vs. v6.0 | OASIS |
| AVG_entorhinal_thickavg       | ICC2 | 0.797 | 10.11  | 19 | 19 | 2.68E-06 | 0.594  | 0.902 | v5.3 vs. v7.1 | OASIS |
| AVG_entorhinal_thickavg       | ICC3 | 0.903 | 19.59  | 19 | 19 | 1.07E-08 | 0.801  | 0.954 | v6.0          | OASIS |
| AVG_entorhinal_thickavg       | ICC2 | 0.710 | 30.18  | 19 | 19 | 2.37E-10 | -0.026 | 0.906 | v6.0 vs. v7.1 | OASIS |
| AVG_entorhinal_thickavg       | ICC3 | 0.917 | 23.21  | 19 | 19 | 2.44E-09 | 0.829  | 0.961 | v7.1          | OASIS |
| AVG_frontalpole_thickavg      | ICC3 | 0.786 | 8.36   | 19 | 19 | 1.18E-05 | 0.588  | 0.895 | v5.3          | OASIS |
| AVG_frontalpole_thickavg      | ICC2 | 0.787 | 13.40  | 19 | 19 | 2.70E-07 | 0.399  | 0.912 | v5.3 vs. v6.0 | OASIS |
| AVG_frontalpole_thickavg      | ICC2 | 0.741 | 8.79   | 19 | 19 | 8.04E-06 | 0.441  | 0.880 | v5.3 vs. v7.1 | OASIS |
| AVG_frontalpole_thickavg      | ICC3 | 0.793 | 8.67   | 19 | 19 | 8.93E-06 | 0.600  | 0.899 | v6.0          | OASIS |
| AVG_frontalpole_thickavg      | ICC2 | 0.831 | 10.40  | 19 | 19 | 2.14E-06 | 0.666  | 0.918 | v6.0 vs. v7.1 | OASIS |
| AVG_frontalpole_thickavg      | ICC3 | 0.904 | 19.85  | 19 | 19 | 9.55E-09 | 0.803  | 0.955 | v7.1          | OASIS |
| AVG_fusiform_thickavg         | ICC3 | 0.616 | 4.21   | 19 | 19 | 1.47E-03 | 0.320  | 0.802 | v5.3          | OASIS |
| AVG_fusiform_thickavg         | ICC2 | 0.635 | 11.14  | 19 | 19 | 1.23E-06 | 0.001  | 0.858 | v5.3 vs. v6.0 | OASIS |
| AVG_fusiform_thickavg         | ICC2 | 0.665 | 6.18   | 19 | 19 | 1.12E-04 | 0.353  | 0.836 | v5.3 vs. v7.1 | OASIS |
| AVG_fusiform_thickavg         | ICC3 | 0.751 | 7.04   | 19 | 19 | 4.34E-05 | 0.529  | 0.877 | v6.0          | OASIS |
| AVG_fusiform_thickavg         | ICC2 | 0.774 | 10.99  | 19 | 19 | 1.38E-06 | 0.459  | 0.900 | v6.0 vs. v7.1 | OASIS |
| AVG_fusiform_thickavg         | ICC3 | 0.885 | 16.32  | 19 | 19 | 5.14E-08 | 0.766  | 0.945 | v7.1          | OASIS |
| AVG_Hippocampus               | ICC3 | 0.947 | 36.54  | 19 | 19 | 4.24E-11 | 0.888  | 0.975 | v5.3          | OASIS |
| AVG_Hippocampus               | ICC2 | 0.925 | 25.96  | 19 | 19 | 9.08E-10 | 0.845  | 0.964 | v5.3 vs. v6.0 | OASIS |
| AVG_Hippocampus               | ICC2 | 0.944 | 34.14  | 19 | 19 | 7.83E-11 | 0.883  | 0.973 | v5.3 vs. v7.1 | OASIS |
| AVG_Hippocampus               | ICC3 | 0.971 | 68.36  | 19 | 19 | 1.37E-13 | 0.939  | 0.987 | v6.0          | OASIS |
| AVG_Hippocampus               | ICC2 | 0.934 | 35.41  | 19 | 19 | 5.64E-11 | 0.846  | 0.970 | v6.0 vs. v7.1 | OASIS |
| AVG_Hippocampus               | ICC3 | 0.983 | 117.63 | 19 | 19 | 8.76E-16 | 0.964  | 0.992 | v7.1          | OASIS |
| AVG_inferiorparietal_thickavg | ICC3 | 0.851 | 12.40  | 19 | 19 | 5.12E-07 | 0.702  | 0.928 | v5.3          | OASIS |
| AVG_inferiorparietal_thickavg | ICC2 | 0.893 | 18.04  | 19 | 19 | 2.18E-08 | 0.784  | 0.949 | v5.3 vs. v6.0 | OASIS |
| AVG_inferiorparietal_thickavg | ICC2 | 0.860 | 13.32  | 19 | 19 | 2.83E-07 | 0.723  | 0.933 | v5.3 vs. v7.1 | OASIS |
| AVG_inferiorparietal_thickavg | ICC3 | 0.920 | 24.05  | 19 | 19 | 1.78E-09 | 0.835  | 0.962 | v6.0          | OASIS |
| AVG_inferiorparietal_thickavg | ICC2 | 0.895 | 24.56  | 19 | 19 | 1.48E-09 | 0.723  | 0.955 | v6.0 vs. v7.1 | OASIS |
| AVG_inferiorparietal_thickavg | ICC3 | 0.890 | 17.14  | 19 | 19 | 3.39E-08 | 0.775  | 0.948 | v7.1          | OASIS |
| AVG_inferiortemporal_thickavg | ICC3 | 0.699 | 5.64   | 19 | 19 | 2.12E-04 | 0.445  | 0.849 | v5.3          | OASIS |
| AVG_inferiortemporal_thickavg | ICC2 | 0.783 | 10.26  | 19 | 19 | 2.39E-06 | 0.538  | 0.899 | v5.3 vs. v6.0 | OASIS |
| AVG_inferiortemporal_thickavg | ICC2 | 0.797 | 8.69   | 19 | 19 | 8.80E-06 | 0.609  | 0.901 | v5.3 vs. v7.1 | OASIS |
| AVG_inferiortemporal_thickavg | ICC3 | 0.774 | 7.84   | 19 | 19 | 1.94E-05 | 0.567  | 0.889 | v6.0          | OASIS |
| AVG_inferiortemporal_thickavg | ICC2 | 0.821 | 11.68  | 19 | 19 | 8.41E-07 | 0.635  | 0.915 | v6.0 vs. v7.1 | OASIS |
| AVG_inferiortemporal_thickavg | ICC3 | 0.938 | 31.46  | 19 | 19 | 1.63E-10 | 0.871  | 0.971 | v7.1          | OASIS |
| AVG_insula_thickavg           | ICC3 | 0.801 | 9.04   | 19 | 19 | 6.47E-06 | 0.613  | 0.903 | v5.3          | OASIS |
| AVG_insula_thickavg           | ICC2 | 0.687 | 8.90   | 19 | 19 | 7.33E-06 | 0.220  | 0.866 | v5.3 vs. v6.0 | OASIS |
| AVG_insula_thickavg           | ICC2 | 0.774 | 10.52  | 19 | 19 | 1.95E-06 | 0.485  | 0.898 | v5.3 vs. v7.1 | OASIS |
| AVG_insula_thickavg           | ICC3 | 0.879 | 15.48  | 19 | 19 | 8.06E-08 | 0.754  | 0.942 | v6.0          | OASIS |
| AVG_insula_thickavg           | ICC2 | 0.594 | 46.37  | 19 | 19 | 4.87E-12 | -0.019 | 0.861 | v6.0 vs. v7.1 | OASIS |
| AVG_insula_thickavg           | ICC3 | 0.940 | 32.37  | 19 | 19 | 1.27E-10 | 0.874  | 0.972 | v7.1          | OASIS |
| AVG_isthmuscingulate_thickavg | ICC3 | 0.879 | 15.58  | 19 | 19 | 7.63E-08 | 0.756  | 0.943 | v5.3          | OASIS |

|                                   |      |       |         |    |    |          |        |       |               |       |
|-----------------------------------|------|-------|---------|----|----|----------|--------|-------|---------------|-------|
| AVG_isthmuscingulate_thickavg     | ICC2 | 0.912 | 45.86   | 19 | 19 | 5.39E-12 | 0.525  | 0.970 | v5.3 vs. v6.0 | OASIS |
| AVG_isthmuscingulate_thickavg     | ICC2 | 0.528 | 22.71   | 19 | 19 | 2.95E-09 | -0.035 | 0.822 | v5.3 vs. v7.1 | OASIS |
| AVG_isthmuscingulate_thickavg     | ICC3 | 0.928 | 26.73   | 19 | 19 | 7.00E-10 | 0.850  | 0.966 | v6.0          | OASIS |
| AVG_isthmuscingulate_thickavg     | ICC2 | 0.689 | 41.13   | 19 | 19 | 1.45E-11 | -0.025 | 0.901 | v6.0 vs. v7.1 | OASIS |
| AVG_isthmuscingulate_thickavg     | ICC3 | 0.932 | 28.53   | 19 | 19 | 3.92E-10 | 0.859  | 0.968 | v7.1          | OASIS |
| AVG_lateraloccipital_thickavg     | ICC3 | 0.871 | 14.51   | 19 | 19 | 1.39E-07 | 0.740  | 0.938 | v5.3          | OASIS |
| AVG_lateraloccipital_thickavg     | ICC2 | 0.891 | 22.37   | 19 | 19 | 3.37E-09 | 0.730  | 0.952 | v5.3 vs. v6.0 | OASIS |
| AVG_lateraloccipital_thickavg     | ICC2 | 0.896 | 18.91   | 19 | 19 | 1.45E-08 | 0.789  | 0.950 | v5.3 vs. v7.1 | OASIS |
| AVG_lateraloccipital_thickavg     | ICC3 | 0.925 | 25.83   | 19 | 19 | 9.50E-10 | 0.845  | 0.965 | v6.0          | OASIS |
| AVG_lateraloccipital_thickavg     | ICC2 | 0.876 | 31.57   | 19 | 19 | 1.58E-10 | 0.424  | 0.957 | v6.0 vs. v7.1 | OASIS |
| AVG_lateraloccipital_thickavg     | ICC3 | 0.965 | 56.75   | 19 | 19 | 7.63E-13 | 0.926  | 0.984 | v7.1          | OASIS |
| AVG_lateralorbitofrontal_thickavg | ICC3 | 0.680 | 5.26    | 19 | 19 | 3.45E-04 | 0.416  | 0.839 | v5.3          | OASIS |
| AVG_lateralorbitofrontal_thickavg | ICC2 | 0.676 | 9.38    | 19 | 19 | 4.84E-06 | 0.151  | 0.865 | v5.3 vs. v6.0 | OASIS |
| AVG_lateralorbitofrontal_thickavg | ICC2 | 0.665 | 5.00    | 19 | 19 | 4.83E-04 | 0.400  | 0.829 | v5.3 vs. v7.1 | OASIS |
| AVG_lateralorbitofrontal_thickavg | ICC3 | 0.765 | 7.51    | 19 | 19 | 2.67E-05 | 0.552  | 0.884 | v6.0          | OASIS |
| AVG_lateralorbitofrontal_thickavg | ICC2 | 0.734 | 11.24   | 19 | 19 | 1.15E-06 | 0.260  | 0.891 | v6.0 vs. v7.1 | OASIS |
| AVG_lateralorbitofrontal_thickavg | ICC3 | 0.791 | 8.55    | 19 | 19 | 9.96E-06 | 0.596  | 0.898 | v7.1          | OASIS |
| AVG_LateralVentricle              | ICC3 | 0.998 | 1235.69 | 19 | 19 | 1.98E-25 | 0.996  | 0.999 | v5.3          | OASIS |
| AVG_LateralVentricle              | ICC2 | 0.994 | 3419.08 | 19 | 19 | 1.26E-29 | 0.596  | 0.998 | v5.3 vs. v6.0 | OASIS |
| AVG_LateralVentricle              | ICC2 | 0.993 | 3628.17 | 19 | 19 | 7.18E-30 | 0.518  | 0.998 | v5.3 vs. v7.1 | OASIS |
| AVG_LateralVentricle              | ICC3 | 0.999 | 1761.69 | 19 | 19 | 6.84E-27 | 0.998  | 0.999 | v6.0          | OASIS |
| AVG_LateralVentricle              | ICC2 | 1.000 | 6892.87 | 19 | 19 | 1.62E-32 | 0.999  | 1.000 | v6.0 vs. v7.1 | OASIS |
| AVG_LateralVentricle              | ICC3 | 0.999 | 1801.73 | 19 | 19 | 5.52E-27 | 0.998  | 0.999 | v7.1          | OASIS |
| AVG_lingual_thickavg              | ICC3 | 0.891 | 17.34   | 19 | 19 | 3.07E-08 | 0.778  | 0.948 | v5.3          | OASIS |
| AVG_lingual_thickavg              | ICC2 | 0.777 | 23.95   | 19 | 19 | 1.85E-09 | 0.060  | 0.925 | v5.3 vs. v6.0 | OASIS |
| AVG_lingual_thickavg              | ICC2 | 0.878 | 14.74   | 19 | 19 | 1.22E-07 | 0.753  | 0.942 | v5.3 vs. v7.1 | OASIS |
| AVG_lingual_thickavg              | ICC3 | 0.895 | 18.03   | 19 | 19 | 2.19E-08 | 0.785  | 0.950 | v6.0          | OASIS |
| AVG_lingual_thickavg              | ICC2 | 0.785 | 26.56   | 19 | 19 | 7.41E-10 | 0.053  | 0.930 | v6.0 vs. v7.1 | OASIS |
| AVG_lingual_thickavg              | ICC3 | 0.911 | 21.35   | 19 | 19 | 5.07E-09 | 0.816  | 0.958 | v7.1          | OASIS |
| AVG_medialorbitofrontal_thickavg  | ICC3 | 0.764 | 7.49    | 19 | 19 | 2.74E-05 | 0.551  | 0.884 | v5.3          | OASIS |
| AVG_medialorbitofrontal_thickavg  | ICC2 | 0.794 | 14.66   | 19 | 19 | 1.27E-07 | 0.378  | 0.917 | v5.3 vs. v6.0 | OASIS |
| AVG_medialorbitofrontal_thickavg  | ICC2 | 0.785 | 8.20    | 19 | 19 | 1.37E-05 | 0.590  | 0.894 | v5.3 vs. v7.1 | OASIS |
| AVG_medialorbitofrontal_thickavg  | ICC3 | 0.829 | 10.73   | 19 | 19 | 1.67E-06 | 0.664  | 0.918 | v6.0          | OASIS |
| AVG_medialorbitofrontal_thickavg  | ICC2 | 0.855 | 29.21   | 19 | 19 | 3.17E-10 | 0.312  | 0.950 | v6.0 vs. v7.1 | OASIS |
| AVG_medialorbitofrontal_thickavg  | ICC3 | 0.799 | 8.96    | 19 | 19 | 6.93E-06 | 0.610  | 0.902 | v7.1          | OASIS |
| AVG_middletemporal_thickavg       | ICC3 | 0.772 | 7.76    | 19 | 19 | 2.10E-05 | 0.563  | 0.888 | v5.3          | OASIS |
| AVG_middletemporal_thickavg       | ICC2 | 0.872 | 15.89   | 19 | 19 | 6.47E-08 | 0.741  | 0.939 | v5.3 vs. v6.0 | OASIS |
| AVG_middletemporal_thickavg       | ICC2 | 0.742 | 6.90    | 19 | 19 | 5.04E-05 | 0.520  | 0.871 | v5.3 vs. v7.1 | OASIS |
| AVG_middletemporal_thickavg       | ICC3 | 0.792 | 8.60    | 19 | 19 | 9.58E-06 | 0.597  | 0.898 | v6.0          | OASIS |
| AVG_middletemporal_thickavg       | ICC2 | 0.766 | 10.02   | 19 | 19 | 2.88E-06 | 0.474  | 0.893 | v6.0 vs. v7.1 | OASIS |
| AVG_middletemporal_thickavg       | ICC3 | 0.915 | 22.58   | 19 | 19 | 3.11E-09 | 0.825  | 0.960 | v7.1          | OASIS |
| AVG_Pallidum                      | ICC3 | 0.930 | 27.77   | 19 | 19 | 4.99E-10 | 0.855  | 0.967 | v5.3          | OASIS |
| AVG_Pallidum                      | ICC2 | 0.790 | 10.25   | 19 | 19 | 2.40E-06 | 0.562  | 0.901 | v5.3 vs. v6.0 | OASIS |
| AVG_Pallidum                      | ICC2 | 0.709 | 9.96    | 19 | 19 | 3.02E-06 | 0.233  | 0.878 | v5.3 vs. v7.1 | OASIS |

|                               |      |       |        |    |    |          |        |       |               |       |
|-------------------------------|------|-------|--------|----|----|----------|--------|-------|---------------|-------|
| AVG Pallidum                  | ICC3 | 0.951 | 39.65  | 19 | 19 | 2.02E-11 | 0.896  | 0.977 | v6.0          | OASIS |
| AVG_Pallidum                  | ICC2 | 0.911 | 37.93  | 19 | 19 | 3.03E-11 | 0.632  | 0.967 | v6.0 vs. v7.1 | OASIS |
| AVG_Pallidum                  | ICC3 | 0.936 | 30.49  | 19 | 19 | 2.16E-10 | 0.867  | 0.970 | v7.1          | OASIS |
| AVG_paracentral_thickavg      | ICC3 | 0.882 | 15.97  | 19 | 19 | 6.19E-08 | 0.761  | 0.944 | v5.3          | OASIS |
| AVG_paracentral_thickavg      | ICC2 | 0.681 | 21.88  | 19 | 19 | 4.09E-09 | -0.031 | 0.891 | v5.3 vs. v6.0 | OASIS |
| AVG_paracentral_thickavg      | ICC2 | 0.728 | 20.12  | 19 | 19 | 8.51E-09 | 0.012  | 0.907 | v5.3 vs. v7.1 | OASIS |
| AVG_paracentral_thickavg      | ICC3 | 0.874 | 14.93  | 19 | 19 | 1.09E-07 | 0.746  | 0.940 | v6.0          | OASIS |
| AVG_paracentral_thickavg      | ICC2 | 0.962 | 62.33  | 19 | 19 | 3.22E-13 | 0.907  | 0.983 | v6.0 vs. v7.1 | OASIS |
| AVG_paracentral_thickavg      | ICC3 | 0.905 | 20.01  | 19 | 19 | 8.93E-09 | 0.804  | 0.955 | v7.1          | OASIS |
| AVG parahippocampal_thickavg  | ICC3 | 0.824 | 10.34  | 19 | 19 | 2.24E-06 | 0.653  | 0.915 | v5.3          | OASIS |
| AVG parahippocampal_thickavg  | ICC2 | 0.816 | 21.19  | 19 | 19 | 5.41E-09 | 0.262  | 0.934 | v5.3 vs. v6.0 | OASIS |
| AVG parahippocampal_thickavg  | ICC2 | 0.819 | 10.29  | 19 | 19 | 2.33E-06 | 0.650  | 0.912 | v5.3 vs. v7.1 | OASIS |
| AVG parahippocampal_thickavg  | ICC3 | 0.892 | 17.44  | 19 | 19 | 2.92E-08 | 0.779  | 0.948 | v6.0          | OASIS |
| AVG parahippocampal_thickavg  | ICC2 | 0.868 | 30.23  | 19 | 19 | 2.33E-10 | 0.382  | 0.954 | v6.0 vs. v7.1 | OASIS |
| AVG parahippocampal_thickavg  | ICC3 | 0.943 | 34.28  | 19 | 19 | 7.56E-11 | 0.881  | 0.973 | v7.1          | OASIS |
| AVG_parsopercularis_thickavg  | ICC3 | 0.777 | 7.98   | 19 | 19 | 1.69E-05 | 0.573  | 0.891 | v5.3          | OASIS |
| AVG_parsopercularis_thickavg  | ICC2 | 0.894 | 38.43  | 19 | 19 | 2.69E-11 | 0.454  | 0.964 | v5.3 vs. v6.0 | OASIS |
| AVG_parsopercularis_thickavg  | ICC2 | 0.838 | 11.93  | 19 | 19 | 7.06E-07 | 0.681  | 0.921 | v5.3 vs. v7.1 | OASIS |
| AVG_parsopercularis_thickavg  | ICC3 | 0.869 | 14.31  | 19 | 19 | 1.57E-07 | 0.737  | 0.938 | v6.0          | OASIS |
| AVG_parsopercularis_thickavg  | ICC2 | 0.898 | 22.42  | 19 | 19 | 3.30E-09 | 0.768  | 0.954 | v6.0 vs. v7.1 | OASIS |
| AVG_parsopercularis_thickavg  | ICC3 | 0.840 | 11.52  | 19 | 19 | 9.40E-07 | 0.683  | 0.923 | v7.1          | OASIS |
| AVG_parsorbitalis_thickavg    | ICC3 | 0.807 | 9.39   | 19 | 19 | 4.82E-06 | 0.625  | 0.906 | v5.3          | OASIS |
| AVG_parsorbitalis_thickavg    | ICC2 | 0.906 | 20.36  | 19 | 19 | 7.68E-09 | 0.810  | 0.955 | v5.3 vs. v6.0 | OASIS |
| AVG_parsorbitalis_thickavg    | ICC2 | 0.878 | 14.69  | 19 | 19 | 1.25E-07 | 0.752  | 0.942 | v5.3 vs. v7.1 | OASIS |
| AVG_parsorbitalis_thickavg    | ICC3 | 0.913 | 22.01  | 19 | 19 | 3.88E-09 | 0.821  | 0.959 | v6.0          | OASIS |
| AVG_parsorbitalis_thickavg    | ICC2 | 0.909 | 21.95  | 19 | 19 | 3.98E-09 | 0.813  | 0.957 | v6.0 vs. v7.1 | OASIS |
| AVG_parsorbitalis_thickavg    | ICC3 | 0.862 | 13.53  | 19 | 19 | 2.49E-07 | 0.724  | 0.934 | v7.1          | OASIS |
| AVG_parstriangularis_thickavg | ICC3 | 0.705 | 5.79   | 19 | 19 | 1.78E-04 | 0.455  | 0.852 | v5.3          | OASIS |
| AVG_parstriangularis_thickavg | ICC2 | 0.782 | 12.86  | 19 | 19 | 3.81E-07 | 0.401  | 0.909 | v5.3 vs. v6.0 | OASIS |
| AVG_parstriangularis_thickavg | ICC2 | 0.759 | 7.78   | 19 | 19 | 2.05E-05 | 0.545  | 0.880 | v5.3 vs. v7.1 | OASIS |
| AVG_parstriangularis_thickavg | ICC3 | 0.856 | 12.90  | 19 | 19 | 3.71E-07 | 0.712  | 0.931 | v6.0          | OASIS |
| AVG_parstriangularis_thickavg | ICC2 | 0.872 | 17.93  | 19 | 19 | 2.31E-08 | 0.708  | 0.942 | v6.0 vs. v7.1 | OASIS |
| AVG_parstriangularis_thickavg | ICC3 | 0.810 | 9.51   | 19 | 19 | 4.35E-06 | 0.629  | 0.908 | v7.1          | OASIS |
| AVG_pericalcarine_thickavg    | ICC3 | 0.913 | 21.89  | 19 | 19 | 4.08E-09 | 0.820  | 0.959 | v5.3          | OASIS |
| AVG_pericalcarine_thickavg    | ICC2 | 0.727 | 14.86  | 19 | 19 | 1.14E-07 | 0.088  | 0.899 | v5.3 vs. v6.0 | OASIS |
| AVG_pericalcarine_thickavg    | ICC2 | 0.828 | 11.27  | 19 | 19 | 1.12E-06 | 0.663  | 0.916 | v5.3 vs. v7.1 | OASIS |
| AVG_pericalcarine_thickavg    | ICC3 | 0.781 | 8.14   | 19 | 19 | 1.46E-05 | 0.579  | 0.893 | v6.0          | OASIS |
| AVG_pericalcarine_thickavg    | ICC2 | 0.855 | 25.72  | 19 | 19 | 9.85E-10 | 0.387  | 0.948 | v6.0 vs. v7.1 | OASIS |
| AVG_pericalcarine_thickavg    | ICC3 | 0.911 | 21.47  | 19 | 19 | 4.84E-09 | 0.817  | 0.958 | v7.1          | OASIS |
| AVG_postcentral_thickavg      | ICC3 | 0.941 | 32.97  | 19 | 19 | 1.07E-10 | 0.877  | 0.972 | v5.3          | OASIS |
| AVG_postcentral_thickavg      | ICC2 | 0.821 | 32.35  | 19 | 19 | 1.27E-10 | 0.095  | 0.943 | v5.3 vs. v6.0 | OASIS |
| AVG_postcentral_thickavg      | ICC2 | 0.872 | 39.80  | 19 | 19 | 1.96E-11 | 0.247  | 0.959 | v5.3 vs. v7.1 | OASIS |
| AVG_postcentral_thickavg      | ICC3 | 0.959 | 47.82  | 19 | 19 | 3.67E-12 | 0.913  | 0.981 | v6.0          | OASIS |
| AVG_postcentral_thickavg      | ICC2 | 0.981 | 157.25 | 19 | 19 | 5.76E-17 | 0.937  | 0.993 | v6.0 vs. v7.1 | OASIS |

|                                       |      |       |        |    |    |          |        |       |               |       |
|---------------------------------------|------|-------|--------|----|----|----------|--------|-------|---------------|-------|
| AVG_postcentral_thickavg              | ICC3 | 0.919 | 23.76  | 19 | 19 | 1.98E-09 | 0.833  | 0.962 | v7.1          | OASIS |
| AVG_posteriorcingulate_thickavg       | ICC3 | 0.763 | 7.43   | 19 | 19 | 2.90E-05 | 0.548  | 0.883 | v5.3          | OASIS |
| AVG_posteriorcingulate_thickavg       | ICC2 | 0.865 | 27.90  | 19 | 19 | 4.78E-10 | 0.416  | 0.952 | v5.3 vs. v6.0 | OASIS |
| AVG_posteriorcingulate_thickavg       | ICC2 | 0.384 | 10.80  | 19 | 19 | 1.58E-06 | -0.048 | 0.718 | v5.3 vs. v7.1 | OASIS |
| AVG_posteriorcingulate_thickavg       | ICC3 | 0.754 | 7.12   | 19 | 19 | 3.99E-05 | 0.533  | 0.878 | v6.0          | OASIS |
| AVG_posteriorcingulate_thickavg       | ICC2 | 0.536 | 21.13  | 19 | 19 | 5.55E-09 | -0.038 | 0.826 | v6.0 vs. v7.1 | OASIS |
| AVG_posteriorcingulate_thickavg       | ICC3 | 0.858 | 13.08  | 19 | 19 | 3.31E-07 | 0.716  | 0.932 | v7.1          | OASIS |
| AVG_precentral_thickavg               | ICC3 | 0.913 | 21.95  | 19 | 19 | 3.97E-09 | 0.820  | 0.959 | v5.3          | OASIS |
| AVG_precentral_thickavg               | ICC2 | 0.749 | 30.09  | 19 | 19 | 2.43E-10 | -0.010 | 0.920 | v5.3 vs. v6.0 | OASIS |
| AVG_precentral_thickavg               | ICC2 | 0.778 | 24.81  | 19 | 19 | 1.36E-09 | 0.054  | 0.926 | v5.3 vs. v7.1 | OASIS |
| AVG_precentral_thickavg               | ICC3 | 0.955 | 43.41  | 19 | 19 | 8.89E-12 | 0.905  | 0.979 | v6.0          | OASIS |
| AVG_precentral_thickavg               | ICC2 | 0.963 | 61.66  | 19 | 19 | 3.55E-13 | 0.916  | 0.983 | v6.0 vs. v7.1 | OASIS |
| AVG_precentral_thickavg               | ICC3 | 0.822 | 10.22  | 19 | 19 | 2.46E-06 | 0.650  | 0.914 | v7.1          | OASIS |
| AVG_precuneus_thickavg                | ICC3 | 0.863 | 13.64  | 19 | 19 | 2.33E-07 | 0.726  | 0.935 | v5.3          | OASIS |
| AVG_precuneus_thickavg                | ICC2 | 0.884 | 37.65  | 19 | 19 | 3.23E-11 | 0.378  | 0.961 | v5.3 vs. v6.0 | OASIS |
| AVG_precuneus_thickavg                | ICC2 | 0.888 | 16.94  | 19 | 19 | 3.74E-08 | 0.776  | 0.947 | v5.3 vs. v7.1 | OASIS |
| AVG_precuneus_thickavg                | ICC3 | 0.925 | 25.54  | 19 | 19 | 1.05E-09 | 0.844  | 0.965 | v6.0          | OASIS |
| AVG_precuneus_thickavg                | ICC2 | 0.899 | 31.43  | 19 | 19 | 1.65E-10 | 0.627  | 0.961 | v6.0 vs. v7.1 | OASIS |
| AVG_precuneus_thickavg                | ICC3 | 0.944 | 34.40  | 19 | 19 | 7.32E-11 | 0.881  | 0.974 | v7.1          | OASIS |
| AVG_Putamen                           | ICC3 | 0.943 | 34.09  | 19 | 19 | 7.94E-11 | 0.880  | 0.973 | v5.3          | OASIS |
| AVG_Putamen                           | ICC2 | 0.399 | 23.04  | 19 | 19 | 2.60E-09 | -0.023 | 0.738 | v5.3 vs. v6.0 | OASIS |
| AVG_Putamen                           | ICC2 | 0.411 | 21.86  | 19 | 19 | 4.12E-09 | -0.026 | 0.747 | v5.3 vs. v7.1 | OASIS |
| AVG_Putamen                           | ICC3 | 0.979 | 93.48  | 19 | 19 | 7.48E-15 | 0.955  | 0.990 | v6.0          | OASIS |
| AVG_Putamen                           | ICC2 | 0.994 | 353.43 | 19 | 19 | 2.79E-20 | 0.986  | 0.997 | v6.0 vs. v7.1 | OASIS |
| AVG_Putamen                           | ICC3 | 0.981 | 101.87 | 19 | 19 | 3.36E-15 | 0.958  | 0.991 | v7.1          | OASIS |
| AVG_rostralanteriorcingulate_thickavg | ICC3 | 0.613 | 4.17   | 19 | 19 | 1.56E-03 | 0.316  | 0.801 | v5.3          | OASIS |
| AVG_rostralanteriorcingulate_thickavg | ICC2 | 0.694 | 8.18   | 19 | 19 | 1.40E-05 | 0.299  | 0.863 | v5.3 vs. v6.0 | OASIS |
| AVG_rostralanteriorcingulate_thickavg | ICC2 | 0.689 | 5.94   | 19 | 19 | 1.48E-04 | 0.431  | 0.843 | v5.3 vs. v7.1 | OASIS |
| AVG_rostralanteriorcingulate_thickavg | ICC3 | 0.658 | 4.85   | 19 | 19 | 5.91E-04 | 0.382  | 0.826 | v6.0          | OASIS |
| AVG_rostralanteriorcingulate_thickavg | ICC2 | 0.541 | 11.28  | 19 | 19 | 1.11E-06 | -0.055 | 0.817 | v6.0 vs. v7.1 | OASIS |
| AVG_rostralanteriorcingulate_thickavg | ICC3 | 0.665 | 4.96   | 19 | 19 | 5.08E-04 | 0.392  | 0.830 | v7.1          | OASIS |
| AVG_rostralmiddlefrontal_thickavg     | ICC3 | 0.835 | 11.15  | 19 | 19 | 1.23E-06 | 0.674  | 0.921 | v5.3          | OASIS |
| AVG_rostralmiddlefrontal_thickavg     | ICC2 | 0.915 | 28.40  | 19 | 19 | 4.08E-10 | 0.791  | 0.962 | v5.3 vs. v6.0 | OASIS |
| AVG_rostralmiddlefrontal_thickavg     | ICC2 | 0.781 | 8.54   | 19 | 19 | 1.01E-05 | 0.584  | 0.892 | v5.3 vs. v7.1 | OASIS |
| AVG_rostralmiddlefrontal_thickavg     | ICC3 | 0.932 | 28.59  | 19 | 19 | 3.85E-10 | 0.859  | 0.968 | v6.0          | OASIS |
| AVG_rostralmiddlefrontal_thickavg     | ICC2 | 0.920 | 23.03  | 19 | 19 | 2.61E-09 | 0.835  | 0.962 | v6.0 vs. v7.1 | OASIS |
| AVG_rostralmiddlefrontal_thickavg     | ICC3 | 0.930 | 27.74  | 19 | 19 | 5.03E-10 | 0.855  | 0.967 | v7.1          | OASIS |
| AVG_superiorfrontal_thickavg          | ICC3 | 0.831 | 10.84  | 19 | 19 | 1.54E-06 | 0.667  | 0.918 | v5.3          | OASIS |
| AVG_superiorfrontal_thickavg          | ICC2 | 0.928 | 27.53  | 19 | 19 | 5.39E-10 | 0.852  | 0.966 | v5.3 vs. v6.0 | OASIS |
| AVG_superiorfrontal_thickavg          | ICC2 | 0.885 | 16.38  | 19 | 19 | 4.99E-08 | 0.770  | 0.945 | v5.3 vs. v7.1 | OASIS |
| AVG_superiorfrontal_thickavg          | ICC3 | 0.902 | 19.39  | 19 | 19 | 1.17E-08 | 0.799  | 0.954 | v6.0          | OASIS |
| AVG_superiorfrontal_thickavg          | ICC2 | 0.951 | 38.18  | 19 | 19 | 2.85E-11 | 0.897  | 0.977 | v6.0 vs. v7.1 | OASIS |
| AVG_superiorfrontal_thickavg          | ICC3 | 0.879 | 15.53  | 19 | 19 | 7.86E-08 | 0.755  | 0.942 | v7.1          | OASIS |
| AVG_superiorparietal_thickavg         | ICC3 | 0.874 | 14.85  | 19 | 19 | 1.14E-07 | 0.745  | 0.940 | v5.3          | OASIS |

|                                 |      |       |         |    |    |          |        |       |               |       |
|---------------------------------|------|-------|---------|----|----|----------|--------|-------|---------------|-------|
| AVG_superiorparietal_thickavg   | ICC2 | 0.843 | 32.90   | 19 | 19 | 1.09E-10 | 0.175  | 0.949 | v5.3 vs. v6.0 | OASIS |
| AVG_superiorparietal_thickavg   | ICC2 | 0.835 | 23.81   | 19 | 19 | 1.95E-09 | 0.305  | 0.942 | v5.3 vs. v7.1 | OASIS |
| AVG_superiorparietal_thickavg   | ICC3 | 0.954 | 42.71   | 19 | 19 | 1.03E-11 | 0.903  | 0.979 | v6.0          | OASIS |
| AVG_superiorparietal_thickavg   | ICC2 | 0.935 | 28.76   | 19 | 19 | 3.65E-10 | 0.865  | 0.970 | v6.0 vs. v7.1 | OASIS |
| AVG_superiorparietal_thickavg   | ICC3 | 0.946 | 35.77   | 19 | 19 | 5.15E-11 | 0.886  | 0.975 | v7.1          | OASIS |
| AVG_superiortemporal_thickavg   | ICC3 | 0.830 | 10.78   | 19 | 19 | 1.61E-06 | 0.665  | 0.918 | v5.3          | OASIS |
| AVG_superiortemporal_thickavg   | ICC2 | 0.864 | 53.40   | 19 | 19 | 1.34E-12 | 0.098  | 0.959 | v5.3 vs. v6.0 | OASIS |
| AVG_superiortemporal_thickavg   | ICC2 | 0.882 | 18.87   | 19 | 19 | 1.48E-08 | 0.742  | 0.946 | v5.3 vs. v7.1 | OASIS |
| AVG_superiortemporal_thickavg   | ICC3 | 0.886 | 16.52   | 19 | 19 | 4.65E-08 | 0.768  | 0.946 | v6.0          | OASIS |
| AVG_superiortemporal_thickavg   | ICC2 | 0.877 | 21.61   | 19 | 19 | 4.56E-09 | 0.660  | 0.948 | v6.0 vs. v7.1 | OASIS |
| AVG_superiortemporal_thickavg   | ICC3 | 0.891 | 17.31   | 19 | 19 | 3.11E-08 | 0.777  | 0.948 | v7.1          | OASIS |
| AVG_supramarginal_thickavg      | ICC3 | 0.919 | 23.80   | 19 | 19 | 1.95E-09 | 0.833  | 0.962 | v5.3          | OASIS |
| AVG_supramarginal_thickavg      | ICC2 | 0.914 | 28.83   | 19 | 19 | 3.56E-10 | 0.781  | 0.963 | v5.3 vs. v6.0 | OASIS |
| AVG_supramarginal_thickavg      | ICC2 | 0.900 | 18.57   | 19 | 19 | 1.70E-08 | 0.797  | 0.953 | v5.3 vs. v7.1 | OASIS |
| AVG_supramarginal_thickavg      | ICC3 | 0.957 | 45.46   | 19 | 19 | 5.83E-12 | 0.909  | 0.980 | v6.0          | OASIS |
| AVG_supramarginal_thickavg      | ICC2 | 0.902 | 34.69   | 19 | 19 | 6.78E-11 | 0.595  | 0.964 | v6.0 vs. v7.1 | OASIS |
| AVG_supramarginal_thickavg      | ICC3 | 0.949 | 38.38   | 19 | 19 | 2.72E-11 | 0.893  | 0.976 | v7.1          | OASIS |
| AVG_temporalpole_thickavg       | ICC3 | 0.593 | 3.91    | 19 | 19 | 2.30E-03 | 0.287  | 0.789 | v5.3          | OASIS |
| AVG_temporalpole_thickavg       | ICC2 | 0.844 | 11.52   | 19 | 19 | 9.37E-07 | 0.692  | 0.925 | v5.3 vs. v6.0 | OASIS |
| AVG_temporalpole_thickavg       | ICC2 | 0.702 | 7.78    | 19 | 19 | 2.05E-05 | 0.356  | 0.862 | v5.3 vs. v7.1 | OASIS |
| AVG_temporalpole_thickavg       | ICC3 | 0.762 | 7.39    | 19 | 19 | 3.02E-05 | 0.546  | 0.883 | v6.0          | OASIS |
| AVG_temporalpole_thickavg       | ICC2 | 0.800 | 15.52   | 19 | 19 | 7.87E-08 | 0.370  | 0.921 | v6.0 vs. v7.1 | OASIS |
| AVG_temporalpole_thickavg       | ICC3 | 0.619 | 4.25    | 19 | 19 | 1.38E-03 | 0.324  | 0.804 | v7.1          | OASIS |
| AVG_Thalamus                    | ICC3 | 0.947 | 36.80   | 19 | 19 | 3.98E-11 | 0.889  | 0.975 | v5.3          | OASIS |
| AVG_Thalamus                    | ICC2 | 0.946 | 35.80   | 19 | 19 | 5.10E-11 | 0.888  | 0.975 | v5.3 vs. v6.0 | OASIS |
| AVG_Thalamus                    | ICC2 | 0.909 | 34.34   | 19 | 19 | 7.44E-11 | 0.671  | 0.965 | v5.3 vs. v7.1 | OASIS |
| AVG_Thalamus                    | ICC3 | 0.977 | 86.27   | 19 | 19 | 1.58E-14 | 0.951  | 0.989 | v6.0          | OASIS |
| AVG_Thalamus                    | ICC2 | 0.925 | 35.25   | 19 | 19 | 5.88E-11 | 0.788  | 0.968 | v6.0 vs. v7.1 | OASIS |
| AVG_Thalamus                    | ICC3 | 0.895 | 18.08   | 19 | 19 | 2.14E-08 | 0.786  | 0.950 | v7.1          | OASIS |
| AVG_Thickness                   | ICC3 | 0.839 | 11.43   | 19 | 19 | 9.99E-07 | 0.681  | 0.922 | v5.3          | OASIS |
| AVG_Thickness                   | ICC2 | 0.819 | 36.08   | 19 | 19 | 4.76E-11 | 0.062  | 0.943 | v5.3 vs. v6.0 | OASIS |
| AVG_Thickness                   | ICC2 | 0.870 | 15.58   | 19 | 19 | 7.62E-08 | 0.737  | 0.938 | v5.3 vs. v7.1 | OASIS |
| AVG_Thickness                   | ICC3 | 0.934 | 29.22   | 19 | 19 | 3.17E-10 | 0.862  | 0.969 | v6.0          | OASIS |
| AVG_Thickness                   | ICC2 | 0.857 | 26.39   | 19 | 19 | 7.84E-10 | 0.387  | 0.949 | v6.0 vs. v7.1 | OASIS |
| AVG_Thickness                   | ICC3 | 0.935 | 29.61   | 19 | 19 | 2.81E-10 | 0.864  | 0.969 | v7.1          | OASIS |
| AVG_transversetemporal_thickavg | ICC3 | 0.946 | 36.29   | 19 | 19 | 4.51E-11 | 0.887  | 0.975 | v5.3          | OASIS |
| AVG_transversetemporal_thickavg | ICC2 | 0.753 | 29.71   | 19 | 19 | 2.73E-10 | -0.006 | 0.921 | v5.3 vs. v6.0 | OASIS |
| AVG_transversetemporal_thickavg | ICC2 | 0.808 | 26.74   | 19 | 19 | 6.98E-10 | 0.116  | 0.937 | v5.3 vs. v7.1 | OASIS |
| AVG_transversetemporal_thickavg | ICC3 | 0.922 | 24.67   | 19 | 19 | 1.42E-09 | 0.838  | 0.963 | v6.0          | OASIS |
| AVG_transversetemporal_thickavg | ICC2 | 0.949 | 48.05   | 19 | 19 | 3.51E-12 | 0.870  | 0.978 | v6.0 vs. v7.1 | OASIS |
| AVG_transversetemporal_thickavg | ICC3 | 0.970 | 65.96   | 19 | 19 | 1.90E-13 | 0.936  | 0.986 | v7.1          | OASIS |
| ICV                             | ICC3 | 0.998 | 844.21  | 19 | 19 | 7.33E-24 | 0.995  | 0.999 | v5.3          | OASIS |
| ICV                             | ICC2 | 0.999 | 2672.94 | 19 | 19 | 1.31E-28 | 0.998  | 1.000 | v5.3 vs. v6.0 | OASIS |
| ICV                             | ICC2 | 0.993 | 320.35  | 19 | 19 | 7.06E-20 | 0.982  | 0.997 | v5.3 vs. v7.1 | OASIS |



|                                     |      |       |        |    |    |          |        |       |               |       |
|-------------------------------------|------|-------|--------|----|----|----------|--------|-------|---------------|-------|
| ICV                                 | ICC3 | 0.998 | 841.04 | 19 | 19 | 7.60E-24 | 0.995  | 0.999 | v6.0          | OASIS |
| ICV                                 | ICC2 | 0.992 | 273.99 | 19 | 19 | 3.09E-19 | 0.983  | 0.996 | v6.0 vs. v7.1 | OASIS |
| ICV                                 | ICC3 | 0.998 | 904.63 | 19 | 19 | 3.81E-24 | 0.995  | 0.999 | v7.1          | OASIS |
| LH_Accumbens                        | ICC3 | 0.834 | 11.04  | 19 | 19 | 1.32E-06 | 0.672  | 0.920 | v5.3          | OASIS |
| LH_Accumbens                        | ICC2 | 0.766 | 7.64   | 19 | 19 | 2.35E-05 | 0.560  | 0.884 | v5.3 vs. v6.0 | OASIS |
| LH_Accumbens                        | ICC2 | 0.706 | 7.97   | 19 | 19 | 1.71E-05 | 0.359  | 0.864 | v5.3 vs. v7.1 | OASIS |
| LH_Accumbens                        | ICC3 | 0.926 | 25.96  | 19 | 19 | 9.09E-10 | 0.846  | 0.965 | v6.0          | OASIS |
| LH_Accumbens                        | ICC2 | 0.850 | 15.20  | 19 | 19 | 9.41E-08 | 0.666  | 0.931 | v6.0 vs. v7.1 | OASIS |
| LH_Accumbens                        | ICC3 | 0.908 | 20.83  | 19 | 19 | 6.27E-09 | 0.811  | 0.957 | v7.1          | OASIS |
| LH_Amygdala                         | ICC3 | 0.831 | 10.84  | 19 | 19 | 1.54E-06 | 0.667  | 0.918 | v5.3          | OASIS |
| LH_Amygdala                         | ICC2 | 0.901 | 27.73  | 19 | 19 | 5.05E-10 | 0.712  | 0.959 | v5.3 vs. v6.0 | OASIS |
| LH_Amygdala                         | ICC2 | 0.842 | 11.47  | 19 | 19 | 9.71E-07 | 0.689  | 0.923 | v5.3 vs. v7.1 | OASIS |
| LH_Amygdala                         | ICC3 | 0.837 | 11.26  | 19 | 19 | 1.12E-06 | 0.677  | 0.921 | v6.0          | OASIS |
| LH_Amygdala                         | ICC2 | 0.912 | 23.45  | 19 | 19 | 2.23E-09 | 0.817  | 0.959 | v6.0 vs. v7.1 | OASIS |
| LH_Amygdala                         | ICC3 | 0.866 | 13.98  | 19 | 19 | 1.90E-07 | 0.731  | 0.936 | v7.1          | OASIS |
| LH_bankssts_surfavg                 | ICC3 | 0.969 | 63.16  | 19 | 19 | 2.84E-13 | 0.934  | 0.986 | v5.3          | OASIS |
| LH_bankssts_surfavg                 | ICC2 | 0.701 | 5.62   | 19 | 19 | 2.18E-04 | 0.451  | 0.849 | v5.3 vs. v6.0 | OASIS |
| LH_bankssts_surfavg                 | ICC2 | 0.598 | 3.87   | 19 | 19 | 2.48E-03 | 0.292  | 0.793 | v5.3 vs. v7.1 | OASIS |
| LH_bankssts_surfavg                 | ICC3 | 0.966 | 57.53  | 19 | 19 | 6.73E-13 | 0.927  | 0.984 | v6.0          | OASIS |
| LH_bankssts_surfavg                 | ICC2 | 0.936 | 29.50  | 19 | 19 | 2.91E-10 | 0.868  | 0.970 | v6.0 vs. v7.1 | OASIS |
| LH_bankssts_surfavg                 | ICC3 | 0.827 | 10.58  | 19 | 19 | 1.87E-06 | 0.660  | 0.916 | v7.1          | OASIS |
| LH_bankssts_thickavg                | ICC3 | 0.775 | 7.88   | 19 | 19 | 1.86E-05 | 0.568  | 0.889 | v5.3          | OASIS |
| LH_bankssts_thickavg                | ICC2 | 0.899 | 23.34  | 19 | 19 | 2.32E-09 | 0.764  | 0.955 | v5.3 vs. v6.0 | OASIS |
| LH_bankssts_thickavg                | ICC2 | 0.912 | 21.49  | 19 | 19 | 4.79E-09 | 0.821  | 0.958 | v5.3 vs. v7.1 | OASIS |
| LH_bankssts_thickavg                | ICC3 | 0.848 | 12.17  | 19 | 19 | 5.98E-07 | 0.698  | 0.927 | v6.0          | OASIS |
| LH_bankssts_thickavg                | ICC2 | 0.890 | 27.57  | 19 | 19 | 5.32E-10 | 0.628  | 0.957 | v6.0 vs. v7.1 | OASIS |
| LH_bankssts_thickavg                | ICC3 | 0.940 | 32.14  | 19 | 19 | 1.35E-10 | 0.874  | 0.972 | v7.1          | OASIS |
| LH_caudalanteriorcingulate_surfavg  | ICC3 | 0.959 | 47.56  | 19 | 19 | 3.86E-12 | 0.913  | 0.981 | v5.3          | OASIS |
| LH_caudalanteriorcingulate_surfavg  | ICC2 | 0.881 | 15.46  | 19 | 19 | 8.17E-08 | 0.761  | 0.943 | v5.3 vs. v6.0 | OASIS |
| LH_caudalanteriorcingulate_surfavg  | ICC2 | 0.858 | 13.77  | 19 | 19 | 2.16E-07 | 0.718  | 0.932 | v5.3 vs. v7.1 | OASIS |
| LH_caudalanteriorcingulate_surfavg  | ICC3 | 0.940 | 32.34  | 19 | 19 | 1.28E-10 | 0.874  | 0.972 | v6.0          | OASIS |
| LH_caudalanteriorcingulate_surfavg  | ICC2 | 0.919 | 39.40  | 19 | 19 | 2.14E-11 | 0.692  | 0.969 | v6.0 vs. v7.1 | OASIS |
| LH_caudalanteriorcingulate_surfavg  | ICC3 | 0.955 | 43.30  | 19 | 19 | 9.09E-12 | 0.905  | 0.979 | v7.1          | OASIS |
| LH_caudalanteriorcingulate_thickavg | ICC3 | 0.633 | 4.45   | 19 | 19 | 1.04E-03 | 0.345  | 0.812 | v5.3          | OASIS |
| LH_caudalanteriorcingulate_thickavg | ICC2 | 0.735 | 6.64   | 19 | 19 | 6.65E-05 | 0.509  | 0.868 | v5.3 vs. v6.0 | OASIS |
| LH_caudalanteriorcingulate_thickavg | ICC2 | 0.636 | 15.33  | 19 | 19 | 8.76E-08 | -0.036 | 0.867 | v5.3 vs. v7.1 | OASIS |
| LH_caudalanteriorcingulate_thickavg | ICC3 | 0.861 | 13.40  | 19 | 19 | 2.71E-07 | 0.721  | 0.933 | v6.0          | OASIS |
| LH_caudalanteriorcingulate_thickavg | ICC2 | 0.525 | 7.51   | 19 | 19 | 2.67E-05 | -0.038 | 0.796 | v6.0 vs. v7.1 | OASIS |
| LH_caudalanteriorcingulate_thickavg | ICC3 | 0.739 | 6.66   | 19 | 19 | 6.49E-05 | 0.509  | 0.871 | v7.1          | OASIS |
| LH_caudalmiddlefrontal_surfavg      | ICC3 | 0.973 | 71.99  | 19 | 19 | 8.48E-14 | 0.942  | 0.987 | v5.3          | OASIS |
| LH_caudalmiddlefrontal_surfavg      | ICC2 | 0.953 | 43.28  | 19 | 19 | 9.12E-12 | 0.901  | 0.978 | v5.3 vs. v6.0 | OASIS |
| LH_caudalmiddlefrontal_surfavg      | ICC2 | 0.953 | 42.78  | 19 | 19 | 1.02E-11 | 0.903  | 0.978 | v5.3 vs. v7.1 | OASIS |
| LH_caudalmiddlefrontal_surfavg      | ICC3 | 0.987 | 151.82 | 19 | 19 | 8.01E-17 | 0.972  | 0.994 | v6.0          | OASIS |
| LH_caudalmiddlefrontal_surfavg      | ICC2 | 0.992 | 230.26 | 19 | 19 | 1.59E-18 | 0.982  | 0.996 | v6.0 vs. v7.1 | OASIS |

|                                 |      |       |        |    |    |          |        |       |               |       |
|---------------------------------|------|-------|--------|----|----|----------|--------|-------|---------------|-------|
| LH_caudalmiddlefrontal_surfavg  | ICC3 | 0.930 | 27.39  | 19 | 19 | 5.63E-10 | 0.853  | 0.967 | v7.1          | OASIS |
| LH_caudalmiddlefrontal_thickavg | ICC3 | 0.798 | 8.93   | 19 | 19 | 7.16E-06 | 0.609  | 0.902 | v5.3          | OASIS |
| LH_caudalmiddlefrontal_thickavg | ICC2 | 0.808 | 26.64  | 19 | 19 | 7.22E-10 | 0.114  | 0.936 | v5.3 vs. v6.0 | OASIS |
| LH_caudalmiddlefrontal_thickavg | ICC2 | 0.820 | 17.39  | 19 | 19 | 2.99E-08 | 0.416  | 0.930 | v5.3 vs. v7.1 | OASIS |
| LH_caudalmiddlefrontal_thickavg | ICC3 | 0.879 | 15.54  | 19 | 19 | 7.79E-08 | 0.755  | 0.942 | v6.0          | OASIS |
| LH_caudalmiddlefrontal_thickavg | ICC2 | 0.928 | 29.31  | 19 | 19 | 3.08E-10 | 0.848  | 0.966 | v6.0 vs. v7.1 | OASIS |
| LH_caudalmiddlefrontal_thickavg | ICC3 | 0.837 | 11.24  | 19 | 19 | 1.14E-06 | 0.677  | 0.921 | v7.1          | OASIS |
| LH_Caudate                      | ICC3 | 0.989 | 173.70 | 19 | 19 | 2.26E-17 | 0.975  | 0.995 | v5.3          | OASIS |
| LH_Caudate                      | ICC2 | 0.958 | 123.73 | 19 | 19 | 5.46E-16 | 0.615  | 0.987 | v5.3 vs. v6.0 | OASIS |
| LH_Caudate                      | ICC2 | 0.979 | 103.30 | 19 | 19 | 2.95E-15 | 0.954  | 0.990 | v5.3 vs. v7.1 | OASIS |
| LH_Caudate                      | ICC3 | 0.983 | 116.01 | 19 | 19 | 9.97E-16 | 0.963  | 0.992 | v6.0          | OASIS |
| LH_Caudate                      | ICC2 | 0.976 | 173.08 | 19 | 19 | 2.34E-17 | 0.832  | 0.992 | v6.0 vs. v7.1 | OASIS |
| LH_Caudate                      | ICC3 | 0.986 | 146.12 | 19 | 19 | 1.15E-16 | 0.971  | 0.994 | v7.1          | OASIS |
| LH_cuneus_surfavg               | ICC3 | 0.962 | 51.22  | 19 | 19 | 1.96E-12 | 0.919  | 0.982 | v5.3          | OASIS |
| LH_cuneus_surfavg               | ICC2 | 0.962 | 60.34  | 19 | 19 | 4.33E-13 | 0.910  | 0.983 | v5.3 vs. v6.0 | OASIS |
| LH_cuneus_surfavg               | ICC2 | 0.920 | 67.72  | 19 | 19 | 1.49E-13 | 0.379  | 0.975 | v5.3 vs. v7.1 | OASIS |
| LH_cuneus_surfavg               | ICC3 | 0.990 | 196.91 | 19 | 19 | 6.95E-18 | 0.978  | 0.995 | v6.0          | OASIS |
| LH_cuneus_surfavg               | ICC2 | 0.963 | 115.87 | 19 | 19 | 1.01E-15 | 0.750  | 0.988 | v6.0 vs. v7.1 | OASIS |
| LH_cuneus_surfavg               | ICC3 | 0.992 | 254.32 | 19 | 19 | 6.24E-19 | 0.983  | 0.996 | v7.1          | OASIS |
| LH_cuneus_thickavg              | ICC3 | 0.919 | 23.69  | 19 | 19 | 2.04E-09 | 0.832  | 0.962 | v5.3          | OASIS |
| LH_cuneus_thickavg              | ICC2 | 0.906 | 47.06  | 19 | 19 | 4.25E-12 | 0.445  | 0.969 | v5.3 vs. v6.0 | OASIS |
| LH_cuneus_thickavg              | ICC2 | 0.917 | 23.31  | 19 | 19 | 2.35E-09 | 0.830  | 0.961 | v5.3 vs. v7.1 | OASIS |
| LH_cuneus_thickavg              | ICC3 | 0.937 | 30.95  | 19 | 19 | 1.89E-10 | 0.869  | 0.971 | v6.0          | OASIS |
| LH_cuneus_thickavg              | ICC2 | 0.930 | 48.99  | 19 | 19 | 2.94E-12 | 0.695  | 0.974 | v6.0 vs. v7.1 | OASIS |
| LH_cuneus_thickavg              | ICC3 | 0.970 | 65.47  | 19 | 19 | 2.04E-13 | 0.936  | 0.986 | v7.1          | OASIS |
| LH_entorhinal_surfavg           | ICC3 | 0.821 | 10.18  | 19 | 19 | 2.53E-06 | 0.649  | 0.913 | v5.3          | OASIS |
| LH_entorhinal_surfavg           | ICC2 | 0.489 | 4.07   | 19 | 19 | 1.80E-03 | 0.091  | 0.737 | v5.3 vs. v6.0 | OASIS |
| LH_entorhinal_surfavg           | ICC2 | 0.494 | 3.26   | 19 | 19 | 6.71E-03 | 0.171  | 0.725 | v5.3 vs. v7.1 | OASIS |
| LH_entorhinal_surfavg           | ICC3 | 0.931 | 28.09  | 19 | 19 | 4.50E-10 | 0.857  | 0.968 | v6.0          | OASIS |
| LH_entorhinal_surfavg           | ICC2 | 0.752 | 8.44   | 19 | 19 | 1.10E-05 | 0.501  | 0.881 | v6.0 vs. v7.1 | OASIS |
| LH_entorhinal_surfavg           | ICC3 | 0.893 | 17.63  | 19 | 19 | 2.66E-08 | 0.781  | 0.949 | v7.1          | OASIS |
| LH_entorhinal_thickavg          | ICC3 | 0.882 | 15.90  | 19 | 19 | 6.43E-08 | 0.760  | 0.944 | v5.3          | OASIS |
| LH_entorhinal_thickavg          | ICC2 | 0.751 | 9.89   | 19 | 19 | 3.19E-06 | 0.418  | 0.889 | v5.3 vs. v6.0 | OASIS |
| LH_entorhinal_thickavg          | ICC2 | 0.761 | 7.70   | 19 | 19 | 2.23E-05 | 0.550  | 0.881 | v5.3 vs. v7.1 | OASIS |
| LH_entorhinal_thickavg          | ICC3 | 0.870 | 14.35  | 19 | 19 | 1.53E-07 | 0.737  | 0.938 | v6.0          | OASIS |
| LH_entorhinal_thickavg          | ICC2 | 0.698 | 23.41  | 19 | 19 | 2.26E-09 | -0.026 | 0.899 | v6.0 vs. v7.1 | OASIS |
| LH_entorhinal_thickavg          | ICC3 | 0.846 | 12.03  | 19 | 19 | 6.59E-07 | 0.695  | 0.926 | v7.1          | OASIS |
| LH_frontalpole_surfavg          | ICC3 | 0.798 | 8.91   | 19 | 19 | 7.27E-06 | 0.608  | 0.902 | v5.3          | OASIS |
| LH_frontalpole_surfavg          | ICC2 | 0.368 | 5.97   | 19 | 19 | 1.42E-04 | -0.070 | 0.690 | v5.3 vs. v6.0 | OASIS |
| LH_frontalpole_surfavg          | ICC2 | 0.237 | 5.92   | 19 | 19 | 1.51E-04 | -0.050 | 0.562 | v5.3 vs. v7.1 | OASIS |
| LH_frontalpole_surfavg          | ICC3 | 0.911 | 21.52  | 19 | 19 | 4.73E-09 | 0.817  | 0.958 | v6.0          | OASIS |
| LH_frontalpole_surfavg          | ICC2 | 0.773 | 32.22  | 19 | 19 | 1.32E-10 | 0.006  | 0.928 | v6.0 vs. v7.1 | OASIS |
| LH_frontalpole_surfavg          | ICC3 | 0.855 | 12.83  | 19 | 19 | 3.86E-07 | 0.711  | 0.931 | v7.1          | OASIS |
| LH_frontalpole_thickavg         | ICC3 | 0.728 | 6.36   | 19 | 19 | 9.09E-05 | 0.491  | 0.865 | v5.3          | OASIS |

|                              |      |       |        |    |    |          |       |       |               |       |
|------------------------------|------|-------|--------|----|----|----------|-------|-------|---------------|-------|
| LH_frontalpole_thickavg      | ICC2 | 0.745 | 10.71  | 19 | 19 | 1.69E-06 | 0.338 | 0.891 | v5.3 vs. v6.0 | OASIS |
| LH_frontalpole_thickavg      | ICC2 | 0.714 | 8.88   | 19 | 19 | 7.42E-06 | 0.327 | 0.873 | v5.3 vs. v7.1 | OASIS |
| LH_frontalpole_thickavg      | ICC3 | 0.759 | 7.30   | 19 | 19 | 3.30E-05 | 0.542 | 0.881 | v6.0          | OASIS |
| LH_frontalpole_thickavg      | ICC2 | 0.752 | 6.76   | 19 | 19 | 5.87E-05 | 0.527 | 0.878 | v6.0 vs. v7.1 | OASIS |
| LH_frontalpole_thickavg      | ICC3 | 0.850 | 12.32  | 19 | 19 | 5.41E-07 | 0.701 | 0.928 | v7.1          | OASIS |
| LH_fusiform_surfvag          | ICC3 | 0.968 | 61.20  | 19 | 19 | 3.81E-13 | 0.932 | 0.985 | v5.3          | OASIS |
| LH_fusiform_surfvag          | ICC2 | 0.830 | 20.96  | 19 | 19 | 5.96E-09 | 0.356 | 0.937 | v5.3 vs. v6.0 | OASIS |
| LH_fusiform_surfvag          | ICC2 | 0.856 | 20.05  | 19 | 19 | 8.76E-09 | 0.560 | 0.942 | v5.3 vs. v7.1 | OASIS |
| LH_fusiform_surfvag          | ICC3 | 0.986 | 138.31 | 19 | 19 | 1.92E-16 | 0.969 | 0.993 | v6.0          | OASIS |
| LH_fusiform_surfvag          | ICC2 | 0.977 | 102.20 | 19 | 19 | 3.26E-15 | 0.944 | 0.990 | v6.0 vs. v7.1 | OASIS |
| LH_fusiform_surfvag          | ICC3 | 0.992 | 234.81 | 19 | 19 | 1.32E-18 | 0.982 | 0.996 | v7.1          | OASIS |
| LH_fusiform_thickavg         | ICC3 | 0.622 | 4.29   | 19 | 19 | 1.30E-03 | 0.329 | 0.806 | v5.3          | OASIS |
| LH_fusiform_thickavg         | ICC2 | 0.697 | 12.07  | 19 | 19 | 6.40E-07 | 0.095 | 0.883 | v5.3 vs. v6.0 | OASIS |
| LH_fusiform_thickavg         | ICC2 | 0.774 | 8.73   | 19 | 19 | 8.49E-06 | 0.563 | 0.890 | v5.3 vs. v7.1 | OASIS |
| LH_fusiform_thickavg         | ICC3 | 0.750 | 7.00   | 19 | 19 | 4.51E-05 | 0.527 | 0.876 | v6.0          | OASIS |
| LH_fusiform_thickavg         | ICC2 | 0.765 | 11.43  | 19 | 19 | 1.00E-06 | 0.389 | 0.900 | v6.0 vs. v7.1 | OASIS |
| LH_fusiform_thickavg         | ICC3 | 0.852 | 12.47  | 19 | 19 | 4.89E-07 | 0.704 | 0.929 | v7.1          | OASIS |
| LH_Hippocampus               | ICC3 | 0.926 | 26.19  | 19 | 19 | 8.38E-10 | 0.847 | 0.965 | v5.3          | OASIS |
| LH_Hippocampus               | ICC2 | 0.876 | 18.19  | 19 | 19 | 2.04E-08 | 0.724 | 0.943 | v5.3 vs. v6.0 | OASIS |
| LH_Hippocampus               | ICC2 | 0.902 | 18.95  | 19 | 19 | 1.43E-08 | 0.801 | 0.953 | v5.3 vs. v7.1 | OASIS |
| LH_Hippocampus               | ICC3 | 0.968 | 61.40  | 19 | 19 | 3.69E-13 | 0.932 | 0.985 | v6.0          | OASIS |
| LH_Hippocampus               | ICC2 | 0.899 | 32.11  | 19 | 19 | 1.36E-10 | 0.614 | 0.962 | v6.0 vs. v7.1 | OASIS |
| LH_Hippocampus               | ICC3 | 0.963 | 52.97  | 19 | 19 | 1.44E-12 | 0.921 | 0.983 | v7.1          | OASIS |
| LH_inferiorparietal_surfvag  | ICC3 | 0.972 | 70.52  | 19 | 19 | 1.03E-13 | 0.940 | 0.987 | v5.3          | OASIS |
| LH_inferiorparietal_surfvag  | ICC2 | 0.824 | 15.61  | 19 | 19 | 7.51E-08 | 0.513 | 0.927 | v5.3 vs. v6.0 | OASIS |
| LH_inferiorparietal_surfvag  | ICC2 | 0.849 | 17.71  | 19 | 19 | 2.56E-08 | 0.585 | 0.936 | v5.3 vs. v7.1 | OASIS |
| LH_inferiorparietal_surfvag  | ICC3 | 0.973 | 73.80  | 19 | 19 | 6.74E-14 | 0.943 | 0.988 | v6.0          | OASIS |
| LH_inferiorparietal_surfvag  | ICC2 | 0.990 | 217.46 | 19 | 19 | 2.73E-18 | 0.980 | 0.996 | v6.0 vs. v7.1 | OASIS |
| LH_inferiorparietal_surfvag  | ICC3 | 0.936 | 30.24  | 19 | 19 | 2.33E-10 | 0.866 | 0.970 | v7.1          | OASIS |
| LH_inferiorparietal_thickavg | ICC3 | 0.860 | 13.29  | 19 | 19 | 2.89E-07 | 0.720 | 0.933 | v5.3          | OASIS |
| LH_inferiorparietal_thickavg | ICC2 | 0.924 | 25.04  | 19 | 19 | 1.25E-09 | 0.844 | 0.964 | v5.3 vs. v6.0 | OASIS |
| LH_inferiorparietal_thickavg | ICC2 | 0.905 | 21.82  | 19 | 19 | 4.19E-09 | 0.804 | 0.955 | v5.3 vs. v7.1 | OASIS |
| LH_inferiorparietal_thickavg | ICC3 | 0.900 | 19.10  | 19 | 19 | 1.34E-08 | 0.796 | 0.953 | v6.0          | OASIS |
| LH_inferiorparietal_thickavg | ICC2 | 0.889 | 21.72  | 19 | 19 | 4.36E-09 | 0.729 | 0.951 | v6.0 vs. v7.1 | OASIS |
| LH_inferiorparietal_thickavg | ICC3 | 0.922 | 24.67  | 19 | 19 | 1.42E-09 | 0.838 | 0.963 | v7.1          | OASIS |
| LH_inferiortemporal_surfvag  | ICC3 | 0.981 | 106.71 | 19 | 19 | 2.18E-15 | 0.960 | 0.991 | v5.3          | OASIS |
| LH_inferiortemporal_surfvag  | ICC2 | 0.928 | 46.76  | 19 | 19 | 4.50E-12 | 0.699 | 0.974 | v5.3 vs. v6.0 | OASIS |
| LH_inferiortemporal_surfvag  | ICC2 | 0.880 | 35.62  | 19 | 19 | 5.34E-11 | 0.373 | 0.959 | v5.3 vs. v7.1 | OASIS |
| LH_inferiortemporal_surfvag  | ICC3 | 0.991 | 220.33 | 19 | 19 | 2.41E-18 | 0.981 | 0.996 | v6.0          | OASIS |
| LH_inferiortemporal_surfvag  | ICC2 | 0.983 | 216.43 | 19 | 19 | 2.85E-18 | 0.910 | 0.994 | v6.0 vs. v7.1 | OASIS |
| LH_inferiortemporal_surfvag  | ICC3 | 0.990 | 206.03 | 19 | 19 | 4.54E-18 | 0.979 | 0.996 | v7.1          | OASIS |
| LH_inferiortemporal_thickavg | ICC3 | 0.753 | 7.10   | 19 | 19 | 4.05E-05 | 0.532 | 0.878 | v5.3          | OASIS |
| LH_inferiortemporal_thickavg | ICC2 | 0.780 | 9.00   | 19 | 19 | 6.69E-06 | 0.572 | 0.893 | v5.3 vs. v6.0 | OASIS |
| LH_inferiortemporal_thickavg | ICC2 | 0.853 | 12.26  | 19 | 19 | 5.65E-07 | 0.708 | 0.930 | v5.3 vs. v7.1 | OASIS |

|                                 |      |       |        |    |    |          |        |       |               |       |
|---------------------------------|------|-------|--------|----|----|----------|--------|-------|---------------|-------|
| LH_inferiortemporal_thickavg    | ICC3 | 0.643 | 4.60   | 19 | 19 | 8.31E-04 | 0.360  | 0.818 | v6.0          | OASIS |
| LH_inferiortemporal_thickavg    | ICC2 | 0.780 | 10.21  | 19 | 19 | 2.48E-06 | 0.528  | 0.898 | v6.0 vs. v7.1 | OASIS |
| LH_inferiortemporal_thickavg    | ICC3 | 0.881 | 15.84  | 19 | 19 | 6.62E-08 | 0.759  | 0.943 | v7.1          | OASIS |
| LH_insula_surfvag               | ICC3 | 0.956 | 43.96  | 19 | 19 | 7.91E-12 | 0.906  | 0.979 | v5.3          | OASIS |
| LH_insula_surfvag               | ICC2 | 0.508 | 19.97  | 19 | 19 | 9.09E-09 | -0.038 | 0.809 | v5.3 vs. v6.0 | OASIS |
| LH_insula_surfvag               | ICC2 | 0.577 | 22.28  | 19 | 19 | 3.49E-09 | -0.039 | 0.847 | v5.3 vs. v7.1 | OASIS |
| LH_insula_surfvag               | ICC3 | 0.763 | 7.45   | 19 | 19 | 2.85E-05 | 0.549  | 0.883 | v6.0          | OASIS |
| LH_insula_surfvag               | ICC2 | 0.858 | 13.42  | 19 | 19 | 2.68E-07 | 0.719  | 0.931 | v6.0 vs. v7.1 | OASIS |
| LH_insula_surfvag               | ICC3 | 0.829 | 10.72  | 19 | 19 | 1.68E-06 | 0.663  | 0.917 | v7.1          | OASIS |
| LH_insula_thickavg              | ICC3 | 0.777 | 7.96   | 19 | 19 | 1.72E-05 | 0.572  | 0.891 | v5.3          | OASIS |
| LH_insula_thickavg              | ICC2 | 0.655 | 6.03   | 19 | 19 | 1.34E-04 | 0.334  | 0.831 | v5.3 vs. v6.0 | OASIS |
| LH_insula_thickavg              | ICC2 | 0.679 | 6.39   | 19 | 19 | 8.77E-05 | 0.379  | 0.842 | v5.3 vs. v7.1 | OASIS |
| LH_insula_thickavg              | ICC3 | 0.737 | 6.60   | 19 | 19 | 6.92E-05 | 0.506  | 0.869 | v6.0          | OASIS |
| LH_insula_thickavg              | ICC2 | 0.612 | 21.31  | 19 | 19 | 5.15E-09 | -0.041 | 0.863 | v6.0 vs. v7.1 | OASIS |
| LH_insula_thickavg              | ICC3 | 0.894 | 17.96  | 19 | 19 | 2.27E-08 | 0.785  | 0.950 | v7.1          | OASIS |
| LH_isthmuscingulate_surfvag     | ICC3 | 0.955 | 43.88  | 19 | 19 | 8.06E-12 | 0.906  | 0.979 | v5.3          | OASIS |
| LH_isthmuscingulate_surfvag     | ICC2 | 0.876 | 33.25  | 19 | 19 | 9.93E-11 | 0.389  | 0.958 | v5.3 vs. v6.0 | OASIS |
| LH_isthmuscingulate_surfvag     | ICC2 | 0.873 | 25.36  | 19 | 19 | 1.12E-09 | 0.538  | 0.952 | v5.3 vs. v7.1 | OASIS |
| LH_isthmuscingulate_surfvag     | ICC3 | 0.986 | 139.11 | 19 | 19 | 1.82E-16 | 0.969  | 0.993 | v6.0          | OASIS |
| LH_isthmuscingulate_surfvag     | ICC2 | 0.978 | 88.30  | 19 | 19 | 1.27E-14 | 0.953  | 0.990 | v6.0 vs. v7.1 | OASIS |
| LH_isthmuscingulate_surfvag     | ICC3 | 0.934 | 29.44  | 19 | 19 | 2.96E-10 | 0.863  | 0.969 | v7.1          | OASIS |
| LH_isthmuscingulate_thickavg    | ICC3 | 0.815 | 9.82   | 19 | 19 | 3.37E-06 | 0.638  | 0.910 | v5.3          | OASIS |
| LH_isthmuscingulate_thickavg    | ICC2 | 0.846 | 26.74  | 19 | 19 | 6.97E-10 | 0.301  | 0.946 | v5.3 vs. v6.0 | OASIS |
| LH_isthmuscingulate_thickavg    | ICC2 | 0.518 | 18.69  | 19 | 19 | 1.61E-08 | -0.041 | 0.814 | v5.3 vs. v7.1 | OASIS |
| LH_isthmuscingulate_thickavg    | ICC3 | 0.918 | 23.38  | 19 | 19 | 2.28E-09 | 0.830  | 0.961 | v6.0          | OASIS |
| LH_isthmuscingulate_thickavg    | ICC2 | 0.720 | 38.45  | 19 | 19 | 2.67E-11 | -0.024 | 0.912 | v6.0 vs. v7.1 | OASIS |
| LH_isthmuscingulate_thickavg    | ICC3 | 0.909 | 20.97  | 19 | 19 | 5.92E-09 | 0.813  | 0.957 | v7.1          | OASIS |
| LH_lateraloccipital_surfvag     | ICC3 | 0.980 | 96.69  | 19 | 19 | 5.46E-15 | 0.956  | 0.991 | v5.3          | OASIS |
| LH_lateraloccipital_surfvag     | ICC2 | 0.759 | 21.51  | 19 | 19 | 4.74E-09 | 0.049  | 0.918 | v5.3 vs. v6.0 | OASIS |
| LH_lateraloccipital_surfvag     | ICC2 | 0.683 | 17.23  | 19 | 19 | 3.23E-08 | -0.016 | 0.888 | v5.3 vs. v7.1 | OASIS |
| LH_lateraloccipital_surfvag     | ICC3 | 0.993 | 270.20 | 19 | 19 | 3.52E-19 | 0.984  | 0.997 | v6.0          | OASIS |
| LH_lateraloccipital_surfvag     | ICC2 | 0.978 | 177.21 | 19 | 19 | 1.87E-17 | 0.872  | 0.993 | v6.0 vs. v7.1 | OASIS |
| LH_lateraloccipital_surfvag     | ICC3 | 0.992 | 241.20 | 19 | 19 | 1.03E-18 | 0.982  | 0.996 | v7.1          | OASIS |
| LH_lateraloccipital_thickavg    | ICC3 | 0.805 | 9.26   | 19 | 19 | 5.39E-06 | 0.620  | 0.905 | v5.3          | OASIS |
| LH_lateraloccipital_thickavg    | ICC2 | 0.858 | 20.26  | 19 | 19 | 7.99E-09 | 0.567  | 0.943 | v5.3 vs. v6.0 | OASIS |
| LH_lateraloccipital_thickavg    | ICC2 | 0.915 | 21.92  | 19 | 19 | 4.02E-09 | 0.826  | 0.960 | v5.3 vs. v7.1 | OASIS |
| LH_lateraloccipital_thickavg    | ICC3 | 0.919 | 23.63  | 19 | 19 | 2.08E-09 | 0.832  | 0.962 | v6.0          | OASIS |
| LH_lateraloccipital_thickavg    | ICC2 | 0.872 | 32.44  | 19 | 19 | 1.24E-10 | 0.374  | 0.956 | v6.0 vs. v7.1 | OASIS |
| LH_lateraloccipital_thickavg    | ICC3 | 0.924 | 25.31  | 19 | 19 | 1.14E-09 | 0.842  | 0.964 | v7.1          | OASIS |
| LH_lateralorbitofrontal_surfvag | ICC3 | 0.920 | 24.08  | 19 | 19 | 1.76E-09 | 0.835  | 0.962 | v5.3          | OASIS |
| LH_lateralorbitofrontal_surfvag | ICC2 | 0.907 | 44.68  | 19 | 19 | 6.82E-12 | 0.490  | 0.969 | v5.3 vs. v6.0 | OASIS |
| LH_lateralorbitofrontal_surfvag | ICC2 | 0.732 | 22.10  | 19 | 19 | 3.74E-09 | 0.002  | 0.910 | v5.3 vs. v7.1 | OASIS |
| LH_lateralorbitofrontal_surfvag | ICC3 | 0.951 | 39.70  | 19 | 19 | 2.00E-11 | 0.896  | 0.977 | v6.0          | OASIS |
| LH_lateralorbitofrontal_surfvag | ICC2 | 0.899 | 57.22  | 19 | 19 | 7.06E-13 | 0.266  | 0.969 | v6.0 vs. v7.1 | OASIS |

|                                  |      |       |         |    |    |          |        |       |               |       |
|----------------------------------|------|-------|---------|----|----|----------|--------|-------|---------------|-------|
| LH_lateralorbitofrontal_surfvag  | ICC3 | 0.956 | 44.44   | 19 | 19 | 7.18E-12 | 0.907  | 0.979 | v7.1          | OASIS |
| LH_lateralorbitofrontal_thickavg | ICC3 | 0.660 | 4.89    | 19 | 19 | 5.63E-04 | 0.385  | 0.827 | v5.3          | OASIS |
| LH_lateralorbitofrontal_thickavg | ICC2 | 0.656 | 12.35   | 19 | 19 | 5.32E-07 | 0.006  | 0.869 | v5.3 vs. v6.0 | OASIS |
| LH_lateralorbitofrontal_thickavg | ICC2 | 0.645 | 6.07    | 19 | 19 | 1.27E-04 | 0.299  | 0.828 | v5.3 vs. v7.1 | OASIS |
| LH_lateralorbitofrontal_thickavg | ICC3 | 0.735 | 6.54    | 19 | 19 | 7.46E-05 | 0.502  | 0.868 | v6.0          | OASIS |
| LH_lateralorbitofrontal_thickavg | ICC2 | 0.798 | 12.79   | 19 | 19 | 3.97E-07 | 0.485  | 0.913 | v6.0 vs. v7.1 | OASIS |
| LH_lateralorbitofrontal_thickavg | ICC3 | 0.829 | 10.67   | 19 | 19 | 1.74E-06 | 0.662  | 0.917 | v7.1          | OASIS |
| LH_LateralVentricle              | ICC3 | 0.997 | 748.63  | 19 | 19 | 2.29E-23 | 0.994  | 0.999 | v5.3          | OASIS |
| LH_LateralVentricle              | ICC2 | 0.993 | 2146.26 | 19 | 19 | 1.05E-27 | 0.638  | 0.998 | v5.3 vs. v6.0 | OASIS |
| LH_LateralVentricle              | ICC2 | 0.991 | 2498.35 | 19 | 19 | 2.48E-28 | 0.510  | 0.998 | v5.3 vs. v7.1 | OASIS |
| LH_LateraVentricle               | ICC3 | 0.998 | 1324.26 | 19 | 19 | 1.03E-25 | 0.997  | 0.999 | v6.0          | OASIS |
| LH_LateraVentricle               | ICC2 | 0.999 | 3163.56 | 19 | 19 | 2.64E-29 | 0.999  | 1.000 | v6.0 vs. v7.1 | OASIS |
| LH_LateraVentricle               | ICC3 | 0.999 | 1383.65 | 19 | 19 | 6.76E-26 | 0.997  | 0.999 | v7.1          | OASIS |
| LH_lingual_surfvag               | ICC3 | 0.973 | 72.92   | 19 | 19 | 7.52E-14 | 0.942  | 0.987 | v5.3          | OASIS |
| LH_lingual_surfvag               | ICC2 | 0.915 | 21.70   | 19 | 19 | 4.40E-09 | 0.825  | 0.960 | v5.3 vs. v6.0 | OASIS |
| LH_lingual_surfvag               | ICC2 | 0.907 | 20.72   | 19 | 19 | 6.59E-09 | 0.812  | 0.956 | v5.3 vs. v7.1 | OASIS |
| LH_lingual_surfvag               | ICC3 | 0.990 | 195.73  | 19 | 19 | 7.36E-18 | 0.978  | 0.995 | v6.0          | OASIS |
| LH_lingual_surfvag               | ICC2 | 0.981 | 213.95  | 19 | 19 | 3.18E-18 | 0.867  | 0.994 | v6.0 vs. v7.1 | OASIS |
| LH_lingual_surfvag               | ICC3 | 0.991 | 211.56  | 19 | 19 | 3.54E-18 | 0.980  | 0.996 | v7.1          | OASIS |
| LH_lingual_thickavg              | ICC3 | 0.843 | 11.71   | 19 | 19 | 8.18E-07 | 0.688  | 0.924 | v5.3          | OASIS |
| LH_lingual_thickavg              | ICC2 | 0.736 | 14.57   | 19 | 19 | 1.34E-07 | 0.125  | 0.902 | v5.3 vs. v6.0 | OASIS |
| LH_lingual_thickavg              | ICC2 | 0.865 | 14.77   | 19 | 19 | 1.20E-07 | 0.728  | 0.935 | v5.3 vs. v7.1 | OASIS |
| LH_lingual_thickavg              | ICC3 | 0.854 | 12.71   | 19 | 19 | 4.18E-07 | 0.709  | 0.930 | v6.0          | OASIS |
| LH_lingual_thickavg              | ICC2 | 0.849 | 24.40   | 19 | 19 | 1.57E-09 | 0.384  | 0.945 | v6.0 vs. v7.1 | OASIS |
| LH_lingual_thickavg              | ICC3 | 0.893 | 17.70   | 19 | 19 | 2.57E-08 | 0.782  | 0.949 | v7.1          | OASIS |
| LH_medialorbitofrontal_surfvag   | ICC3 | 0.762 | 7.41    | 19 | 19 | 2.95E-05 | 0.547  | 0.883 | v5.3          | OASIS |
| LH_medialorbitofrontal_surfvag   | ICC2 | 0.682 | 5.11    | 19 | 19 | 4.18E-04 | 0.416  | 0.840 | v5.3 vs. v6.0 | OASIS |
| LH_medialorbitofrontal_surfvag   | ICC2 | 0.467 | 8.11    | 19 | 19 | 1.49E-05 | -0.063 | 0.767 | v5.3 vs. v7.1 | OASIS |
| LH_medialorbitofrontal_surfvag   | ICC3 | 0.891 | 17.28   | 19 | 19 | 3.16E-08 | 0.777  | 0.948 | v6.0          | OASIS |
| LH_medialorbitofrontal_surfvag   | ICC2 | 0.519 | 12.31   | 19 | 19 | 5.44E-07 | -0.055 | 0.808 | v6.0 vs. v7.1 | OASIS |
| LH_medialorbitofrontal_surfvag   | ICC3 | 0.902 | 19.44   | 19 | 19 | 1.14E-08 | 0.799  | 0.954 | v7.1          | OASIS |
| LH_medialorbitofrontal_thickavg  | ICC3 | 0.679 | 5.24    | 19 | 19 | 3.54E-04 | 0.414  | 0.838 | v5.3          | OASIS |
| LH_medialorbitofrontal_thickavg  | ICC2 | 0.763 | 13.09   | 19 | 19 | 3.29E-07 | 0.292  | 0.905 | v5.3 vs. v6.0 | OASIS |
| LH_medialorbitofrontal_thickavg  | ICC2 | 0.746 | 6.86    | 19 | 19 | 5.24E-05 | 0.526  | 0.874 | v5.3 vs. v7.1 | OASIS |
| LH_medialorbitofrontal_thickavg  | ICC3 | 0.796 | 8.79    | 19 | 19 | 8.08E-06 | 0.604  | 0.900 | v6.0          | OASIS |
| LH_medialorbitofrontal_thickavg  | ICC2 | 0.809 | 18.23   | 19 | 19 | 2.00E-08 | 0.318  | 0.928 | v6.0 vs. v7.1 | OASIS |
| LH_medialorbitofrontal_thickavg  | ICC3 | 0.770 | 7.69    | 19 | 19 | 2.25E-05 | 0.560  | 0.887 | v7.1          | OASIS |
| LH_middletemporal_surfvag        | ICC3 | 0.976 | 84.07   | 19 | 19 | 2.01E-14 | 0.950  | 0.989 | v5.3          | OASIS |
| LH_middletemporal_surfvag        | ICC2 | 0.871 | 48.50   | 19 | 19 | 3.23E-12 | 0.156  | 0.960 | v5.3 vs. v6.0 | OASIS |
| LH_middletemporal_surfvag        | ICC2 | 0.808 | 50.19   | 19 | 19 | 2.36E-12 | 0.007  | 0.943 | v5.3 vs. v7.1 | OASIS |
| LH_middletemporal_surfvag        | ICC3 | 0.981 | 104.72  | 19 | 19 | 2.60E-15 | 0.959  | 0.991 | v6.0          | OASIS |
| LH_middletemporal_surfvag        | ICC2 | 0.978 | 199.72  | 19 | 19 | 6.08E-18 | 0.836  | 0.993 | v6.0 vs. v7.1 | OASIS |
| LH_middletemporal_surfvag        | ICC3 | 0.988 | 165.21  | 19 | 19 | 3.62E-17 | 0.974  | 0.994 | v7.1          | OASIS |
| LH_middletemporal_thickavg       | ICC3 | 0.716 | 6.05    | 19 | 19 | 1.30E-04 | 0.472  | 0.858 | v5.3          | OASIS |

|                             |      |       |        |    |    |          |        |       |               |       |
|-----------------------------|------|-------|--------|----|----|----------|--------|-------|---------------|-------|
| LH_middletemporal_thickavg  | ICC2 | 0.861 | 14.92  | 19 | 19 | 1.10E-07 | 0.717  | 0.934 | v5.3 vs. v6.0 | OASIS |
| LH_middletemporal_thickavg  | ICC2 | 0.821 | 10.76  | 19 | 19 | 1.63E-06 | 0.651  | 0.913 | v5.3 vs. v7.1 | OASIS |
| LH_middletemporal_thickavg  | ICC3 | 0.648 | 4.67   | 19 | 19 | 7.53E-04 | 0.366  | 0.820 | v6.0          | OASIS |
| LH_middletemporal_thickavg  | ICC2 | 0.775 | 12.12  | 19 | 19 | 6.20E-07 | 0.405  | 0.905 | v6.0 vs. v7.1 | OASIS |
| LH_middletemporal_thickavg  | ICC3 | 0.864 | 13.71  | 19 | 19 | 2.23E-07 | 0.727  | 0.935 | v7.1          | OASIS |
| LH_Pallidum                 | ICC3 | 0.923 | 24.87  | 19 | 19 | 1.33E-09 | 0.840  | 0.964 | v5.3          | OASIS |
| LH_Pallidum                 | ICC2 | 0.657 | 5.98   | 19 | 19 | 1.41E-04 | 0.342  | 0.831 | v5.3 vs. v6.0 | OASIS |
| LH_Pallidum                 | ICC2 | 0.620 | 7.69   | 19 | 19 | 2.23E-05 | 0.095  | 0.836 | v5.3 vs. v7.1 | OASIS |
| LH_Pallidum                 | ICC3 | 0.901 | 19.25  | 19 | 19 | 1.25E-08 | 0.798  | 0.953 | v6.0          | OASIS |
| LH_Pallidum                 | ICC2 | 0.839 | 16.19  | 19 | 19 | 5.51E-08 | 0.578  | 0.931 | v6.0 vs. v7.1 | OASIS |
| LH_Pallidum                 | ICC3 | 0.856 | 12.90  | 19 | 19 | 3.70E-07 | 0.712  | 0.931 | v7.1          | OASIS |
| LH_paracentral_surfavg      | ICC3 | 0.958 | 46.65  | 19 | 19 | 4.60E-12 | 0.911  | 0.980 | v5.3          | OASIS |
| LH_paracentral_surfavg      | ICC2 | 0.816 | 10.52  | 19 | 19 | 1.95E-06 | 0.642  | 0.911 | v5.3 vs. v6.0 | OASIS |
| LH_paracentral_surfavg      | ICC2 | 0.831 | 10.83  | 19 | 19 | 1.55E-06 | 0.670  | 0.918 | v5.3 vs. v7.1 | OASIS |
| LH_paracentral_surfavg      | ICC3 | 0.977 | 84.24  | 19 | 19 | 1.97E-14 | 0.950  | 0.989 | v6.0          | OASIS |
| LH_paracentral_surfavg      | ICC2 | 0.984 | 141.57 | 19 | 19 | 1.54E-16 | 0.962  | 0.993 | v6.0 vs. v7.1 | OASIS |
| LH_paracentral_surfavg      | ICC3 | 0.922 | 24.60  | 19 | 19 | 1.46E-09 | 0.838  | 0.963 | v7.1          | OASIS |
| LH_paracentral_thickavg     | ICC3 | 0.860 | 13.28  | 19 | 19 | 2.91E-07 | 0.719  | 0.933 | v5.3          | OASIS |
| LH_paracentral_thickavg     | ICC2 | 0.711 | 20.96  | 19 | 19 | 5.96E-09 | -0.012 | 0.902 | v5.3 vs. v6.0 | OASIS |
| LH_paracentral_thickavg     | ICC2 | 0.756 | 17.57  | 19 | 19 | 2.74E-08 | 0.107  | 0.913 | v5.3 vs. v7.1 | OASIS |
| LH_paracentral_thickavg     | ICC3 | 0.876 | 15.10  | 19 | 19 | 9.95E-08 | 0.749  | 0.941 | v6.0          | OASIS |
| LH_paracentral_thickavg     | ICC2 | 0.952 | 46.60  | 19 | 19 | 4.65E-12 | 0.890  | 0.978 | v6.0 vs. v7.1 | OASIS |
| LH_paracentral_thickavg     | ICC3 | 0.880 | 15.70  | 19 | 19 | 7.16E-08 | 0.757  | 0.943 | v7.1          | OASIS |
| LH parahippocampal_surfavg  | ICC3 | 0.912 | 21.84  | 19 | 19 | 4.16E-09 | 0.819  | 0.959 | v5.3          | OASIS |
| LH parahippocampal_surfavg  | ICC2 | 0.548 | 4.57   | 19 | 19 | 8.71E-04 | 0.170  | 0.772 | v5.3 vs. v6.0 | OASIS |
| LH parahippocampal_surfavg  | ICC2 | 0.457 | 4.81   | 19 | 19 | 6.21E-04 | -0.016 | 0.736 | v5.3 vs. v7.1 | OASIS |
| LH parahippocampal_surfavg  | ICC3 | 0.917 | 23.10  | 19 | 19 | 2.54E-09 | 0.828  | 0.961 | v6.0          | OASIS |
| LH parahippocampal_surfavg  | ICC2 | 0.772 | 9.74   | 19 | 19 | 3.59E-06 | 0.513  | 0.893 | v6.0 vs. v7.1 | OASIS |
| LH parahippocampal_surfavg  | ICC3 | 0.904 | 19.79  | 19 | 19 | 9.81E-09 | 0.803  | 0.954 | v7.1          | OASIS |
| LH parahippocampal_thickavg | ICC3 | 0.829 | 10.71  | 19 | 19 | 1.69E-06 | 0.663  | 0.917 | v5.3          | OASIS |
| LH parahippocampal_thickavg | ICC2 | 0.810 | 16.32  | 19 | 19 | 5.14E-08 | 0.395  | 0.925 | v5.3 vs. v6.0 | OASIS |
| LH parahippocampal_thickavg | ICC2 | 0.856 | 12.96  | 19 | 19 | 3.57E-07 | 0.716  | 0.931 | v5.3 vs. v7.1 | OASIS |
| LH parahippocampal_thickavg | ICC3 | 0.957 | 45.76  | 19 | 19 | 5.49E-12 | 0.910  | 0.980 | v6.0          | OASIS |
| LH parahippocampal_thickavg | ICC2 | 0.882 | 33.16  | 19 | 19 | 1.02E-10 | 0.440  | 0.959 | v6.0 vs. v7.1 | OASIS |
| LH parahippocampal_thickavg | ICC3 | 0.953 | 41.27  | 19 | 19 | 1.41E-11 | 0.900  | 0.978 | v7.1          | OASIS |
| LH_parsopercularis_surfavg  | ICC3 | 0.959 | 48.25  | 19 | 19 | 3.38E-12 | 0.914  | 0.981 | v5.3          | OASIS |
| LH_parsopercularis_surfavg  | ICC2 | 0.936 | 35.41  | 19 | 19 | 5.64E-11 | 0.855  | 0.971 | v5.3 vs. v6.0 | OASIS |
| LH_parsopercularis_surfavg  | ICC2 | 0.947 | 38.73  | 19 | 19 | 2.51E-11 | 0.890  | 0.975 | v5.3 vs. v7.1 | OASIS |
| LH_parsopercularis_surfavg  | ICC3 | 0.987 | 152.40 | 19 | 19 | 7.73E-17 | 0.972  | 0.994 | v6.0          | OASIS |
| LH_parsopercularis_surfavg  | ICC2 | 0.988 | 193.74 | 19 | 19 | 8.10E-18 | 0.973  | 0.995 | v6.0 vs. v7.1 | OASIS |
| LH_parsopercularis_surfavg  | ICC3 | 0.978 | 91.42  | 19 | 19 | 9.21E-15 | 0.954  | 0.990 | v7.1          | OASIS |
| LH_parsopercularis_thickavg | ICC3 | 0.817 | 9.95   | 19 | 19 | 3.05E-06 | 0.642  | 0.911 | v5.3          | OASIS |
| LH_parsopercularis_thickavg | ICC2 | 0.862 | 25.11  | 19 | 19 | 1.22E-09 | 0.461  | 0.949 | v5.3 vs. v6.0 | OASIS |
| LH_parsopercularis_thickavg | ICC2 | 0.876 | 16.22  | 19 | 19 | 5.42E-08 | 0.748  | 0.941 | v5.3 vs. v7.1 | OASIS |

|                              |      |       |        |    |    |          |        |       |               |       |
|------------------------------|------|-------|--------|----|----|----------|--------|-------|---------------|-------|
| LH_parsopercularis_thickavg  | ICC3 | 0.840 | 11.53  | 19 | 19 | 9.34E-07 | 0.683  | 0.923 | v6.0          | OASIS |
| LH_parsopercularis_thickavg  | ICC2 | 0.857 | 15.66  | 19 | 19 | 7.31E-08 | 0.686  | 0.934 | v6.0 vs. v7.1 | OASIS |
| LH_parsopercularis_thickavg  | ICC3 | 0.859 | 13.15  | 19 | 19 | 3.16E-07 | 0.717  | 0.932 | v7.1          | OASIS |
| LH_parsorbitalis_surfavg     | ICC3 | 0.853 | 12.58  | 19 | 19 | 4.57E-07 | 0.706  | 0.929 | v5.3          | OASIS |
| LH_parsorbitalis_surfavg     | ICC2 | 0.420 | 9.37   | 19 | 19 | 4.90E-06 | -0.059 | 0.741 | v5.3 vs. v6.0 | OASIS |
| LH_parsorbitalis_surfavg     | ICC2 | 0.329 | 10.62  | 19 | 19 | 1.82E-06 | -0.041 | 0.671 | v5.3 vs. v7.1 | OASIS |
| LH_parsorbitalis_surfavg     | ICC3 | 0.915 | 22.51  | 19 | 19 | 3.19E-09 | 0.824  | 0.960 | v6.0          | OASIS |
| LH_parsorbitalis_surfavg     | ICC2 | 0.889 | 30.56  | 19 | 19 | 2.12E-10 | 0.557  | 0.959 | v6.0 vs. v7.1 | OASIS |
| LH_parsorbitalis_surfavg     | ICC3 | 0.953 | 41.35  | 19 | 19 | 1.38E-11 | 0.900  | 0.978 | v7.1          | OASIS |
| LH_parsorbitalis_thickavg    | ICC3 | 0.908 | 20.80  | 19 | 19 | 6.37E-09 | 0.811  | 0.957 | v5.3          | OASIS |
| LH_parsorbitalis_thickavg    | ICC2 | 0.909 | 26.99  | 19 | 19 | 6.43E-10 | 0.776  | 0.960 | v5.3 vs. v6.0 | OASIS |
| LH_parsorbitalis_thickavg    | ICC2 | 0.884 | 16.03  | 19 | 19 | 5.98E-08 | 0.767  | 0.945 | v5.3 vs. v7.1 | OASIS |
| LH_parsorbitalis_thickavg    | ICC3 | 0.917 | 23.11  | 19 | 19 | 2.53E-09 | 0.828  | 0.961 | v6.0          | OASIS |
| LH_parsorbitalis_thickavg    | ICC2 | 0.891 | 18.49  | 19 | 19 | 1.76E-08 | 0.778  | 0.948 | v6.0 vs. v7.1 | OASIS |
| LH_parsorbitalis_thickavg    | ICC3 | 0.880 | 15.68  | 19 | 19 | 7.25E-08 | 0.757  | 0.943 | v7.1          | OASIS |
| LH_parstriangularis_surfavg  | ICC3 | 0.969 | 63.32  | 19 | 19 | 2.78E-13 | 0.934  | 0.986 | v5.3          | OASIS |
| LH_parstriangularis_surfavg  | ICC2 | 0.930 | 32.54  | 19 | 19 | 1.21E-10 | 0.842  | 0.968 | v5.3 vs. v6.0 | OASIS |
| LH_parstriangularis_surfavg  | ICC2 | 0.927 | 43.19  | 19 | 19 | 9.29E-12 | 0.725  | 0.972 | v5.3 vs. v7.1 | OASIS |
| LH_parstriangularis_surfavg  | ICC3 | 0.981 | 104.24 | 19 | 19 | 2.71E-15 | 0.959  | 0.991 | v6.0          | OASIS |
| LH_parstriangularis_surfavg  | ICC2 | 0.976 | 96.44  | 19 | 19 | 5.60E-15 | 0.945  | 0.989 | v6.0 vs. v7.1 | OASIS |
| LH_parstriangularis_surfavg  | ICC3 | 0.983 | 114.93 | 19 | 19 | 1.09E-15 | 0.963  | 0.992 | v7.1          | OASIS |
| LH_parstriangularis_thickavg | ICC3 | 0.709 | 5.88   | 19 | 19 | 1.59E-04 | 0.461  | 0.855 | v5.3          | OASIS |
| LH_parstriangularis_thickavg | ICC2 | 0.785 | 12.41  | 19 | 19 | 5.12E-07 | 0.437  | 0.908 | v5.3 vs. v6.0 | OASIS |
| LH_parstriangularis_thickavg | ICC2 | 0.826 | 10.49  | 19 | 19 | 2.00E-06 | 0.661  | 0.915 | v5.3 vs. v7.1 | OASIS |
| LH_parstriangularis_thickavg | ICC3 | 0.790 | 8.53   | 19 | 19 | 1.01E-05 | 0.595  | 0.897 | v6.0          | OASIS |
| LH_parstriangularis_thickavg | ICC2 | 0.841 | 16.70  | 19 | 19 | 4.24E-08 | 0.569  | 0.933 | v6.0 vs. v7.1 | OASIS |
| LH_parstriangularis_thickavg | ICC3 | 0.833 | 10.98  | 19 | 19 | 1.38E-06 | 0.670  | 0.919 | v7.1          | OASIS |
| LH_pericalcarine_surfavg     | ICC3 | 0.967 | 59.40  | 19 | 19 | 5.01E-13 | 0.930  | 0.985 | v5.3          | OASIS |
| LH_pericalcarine_surfavg     | ICC2 | 0.935 | 41.49  | 19 | 19 | 1.34E-11 | 0.808  | 0.973 | v5.3 vs. v6.0 | OASIS |
| LH_pericalcarine_surfavg     | ICC2 | 0.883 | 26.02  | 19 | 19 | 8.90E-10 | 0.601  | 0.954 | v5.3 vs. v7.1 | OASIS |
| LH_pericalcarine_surfavg     | ICC3 | 0.988 | 169.29 | 19 | 19 | 2.88E-17 | 0.975  | 0.995 | v6.0          | OASIS |
| LH_pericalcarine_surfavg     | ICC2 | 0.973 | 95.97  | 19 | 19 | 5.86E-15 | 0.929  | 0.989 | v6.0 vs. v7.1 | OASIS |
| LH_pericalcarine_surfavg     | ICC3 | 0.976 | 81.53  | 19 | 19 | 2.67E-14 | 0.948  | 0.989 | v7.1          | OASIS |
| LH_pericalcarine_thickavg    | ICC3 | 0.865 | 13.84  | 19 | 19 | 2.07E-07 | 0.729  | 0.936 | v5.3          | OASIS |
| LH_pericalcarine_thickavg    | ICC2 | 0.686 | 9.42   | 19 | 19 | 4.68E-06 | 0.183  | 0.868 | v5.3 vs. v6.0 | OASIS |
| LH_pericalcarine_thickavg    | ICC2 | 0.813 | 9.83   | 19 | 19 | 3.36E-06 | 0.640  | 0.909 | v5.3 vs. v7.1 | OASIS |
| LH_pericalcarine_thickavg    | ICC3 | 0.807 | 9.36   | 19 | 19 | 4.92E-06 | 0.624  | 0.906 | v6.0          | OASIS |
| LH_pericalcarine_thickavg    | ICC2 | 0.853 | 27.28  | 19 | 19 | 5.84E-10 | 0.340  | 0.949 | v6.0 vs. v7.1 | OASIS |
| LH_pericalcarine_thickavg    | ICC3 | 0.891 | 17.35  | 19 | 19 | 3.05E-08 | 0.778  | 0.948 | v7.1          | OASIS |
| LH_postcentral_surfavg       | ICC3 | 0.951 | 39.94  | 19 | 19 | 1.89E-11 | 0.897  | 0.977 | v5.3          | OASIS |
| LH_postcentral_surfavg       | ICC2 | 0.632 | 4.58   | 19 | 19 | 8.61E-04 | 0.353  | 0.810 | v5.3 vs. v6.0 | OASIS |
| LH_postcentral_surfavg       | ICC2 | 0.706 | 5.69   | 19 | 19 | 2.01E-04 | 0.458  | 0.852 | v5.3 vs. v7.1 | OASIS |
| LH_postcentral_surfavg       | ICC3 | 0.986 | 137.25 | 19 | 19 | 2.07E-16 | 0.969  | 0.993 | v6.0          | OASIS |
| LH_postcentral_surfavg       | ICC2 | 0.970 | 99.41  | 19 | 19 | 4.22E-15 | 0.895  | 0.988 | v6.0 vs. v7.1 | OASIS |

|                                |      |       |        |    |    |          |        |       |               |       |
|--------------------------------|------|-------|--------|----|----|----------|--------|-------|---------------|-------|
| LH_postcentral_surfavg         | ICC3 | 0.974 | 76.07  | 19 | 19 | 5.09E-14 | 0.945  | 0.988 | v7.1          | OASIS |
| LH_postcentral_thickavg        | ICC3 | 0.888 | 16.82  | 19 | 19 | 3.98E-08 | 0.772  | 0.947 | v5.3          | OASIS |
| LH_postcentral_thickavg        | ICC2 | 0.815 | 26.01  | 19 | 19 | 8.91E-10 | 0.150  | 0.938 | v5.3 vs. v6.0 | OASIS |
| LH_postcentral_thickavg        | ICC2 | 0.873 | 25.55  | 19 | 19 | 1.04E-09 | 0.535  | 0.952 | v5.3 vs. v7.1 | OASIS |
| LH_postcentral_thickavg        | ICC3 | 0.944 | 34.69  | 19 | 19 | 6.78E-11 | 0.882  | 0.974 | v6.0          | OASIS |
| LH_postcentral_thickavg        | ICC2 | 0.966 | 103.96 | 19 | 19 | 2.78E-15 | 0.828  | 0.988 | v6.0 vs. v7.1 | OASIS |
| LH_postcentral_thickavg        | ICC3 | 0.690 | 5.46   | 19 | 19 | 2.67E-04 | 0.431  | 0.844 | v7.1          | OASIS |
| LH_posteriorcingulate_surfavg  | ICC3 | 0.976 | 83.09  | 19 | 19 | 2.24E-14 | 0.949  | 0.989 | v5.3          | OASIS |
| LH_posteriorcingulate_surfavg  | ICC2 | 0.951 | 38.52  | 19 | 19 | 2.63E-11 | 0.897  | 0.977 | v5.3 vs. v6.0 | OASIS |
| LH_posteriorcingulate_surfavg  | ICC2 | 0.939 | 40.01  | 19 | 19 | 1.87E-11 | 0.847  | 0.973 | v5.3 vs. v7.1 | OASIS |
| LH_posteriorcingulate_surfavg  | ICC3 | 0.973 | 74.47  | 19 | 19 | 6.20E-14 | 0.943  | 0.988 | v6.0          | OASIS |
| LH_posteriorcingulate_surfavg  | ICC2 | 0.974 | 120.39 | 19 | 19 | 7.05E-16 | 0.899  | 0.990 | v6.0 vs. v7.1 | OASIS |
| LH_posteriorcingulate_surfavg  | ICC3 | 0.989 | 179.21 | 19 | 19 | 1.69E-17 | 0.976  | 0.995 | v7.1          | OASIS |
| LH_posteriorcingulate_thickavg | ICC3 | 0.676 | 5.16   | 19 | 19 | 3.89E-04 | 0.409  | 0.836 | v5.3          | OASIS |
| LH_posteriorcingulate_thickavg | ICC2 | 0.837 | 17.37  | 19 | 19 | 3.02E-08 | 0.525  | 0.933 | v5.3 vs. v6.0 | OASIS |
| LH_posteriorcingulate_thickavg | ICC2 | 0.304 | 7.80   | 19 | 19 | 2.01E-05 | -0.050 | 0.642 | v5.3 vs. v7.1 | OASIS |
| LH_posteriorcingulate_thickavg | ICC3 | 0.649 | 4.70   | 19 | 19 | 7.26E-04 | 0.369  | 0.821 | v6.0          | OASIS |
| LH_posteriorcingulate_thickavg | ICC2 | 0.446 | 11.33  | 19 | 19 | 1.07E-06 | -0.054 | 0.763 | v6.0 vs. v7.1 | OASIS |
| LH_posteriorcingulate_thickavg | ICC3 | 0.725 | 6.26   | 19 | 19 | 1.01E-04 | 0.486  | 0.863 | v7.1          | OASIS |
| LH_precentral_surfavg          | ICC3 | 0.578 | 3.74   | 19 | 19 | 3.04E-03 | 0.266  | 0.780 | v5.3          | OASIS |
| LH_precentral_surfavg          | ICC2 | 0.899 | 23.01  | 19 | 19 | 2.63E-09 | 0.769  | 0.955 | v5.3 vs. v6.0 | OASIS |
| LH_precentral_surfavg          | ICC2 | 0.906 | 30.33  | 19 | 19 | 2.27E-10 | 0.708  | 0.962 | v5.3 vs. v7.1 | OASIS |
| LH_precentral_surfavg          | ICC3 | 0.982 | 110.12 | 19 | 19 | 1.62E-15 | 0.961  | 0.992 | v6.0          | OASIS |
| LH_precentral_surfavg          | ICC2 | 0.991 | 246.23 | 19 | 19 | 8.46E-19 | 0.979  | 0.996 | v6.0 vs. v7.1 | OASIS |
| LH_precentral_surfavg          | ICC3 | 0.900 | 19.07  | 19 | 19 | 1.35E-08 | 0.796  | 0.953 | v7.1          | OASIS |
| LH_precentral_thickavg         | ICC3 | 0.769 | 7.65   | 19 | 19 | 2.33E-05 | 0.558  | 0.886 | v5.3          | OASIS |
| LH_precentral_thickavg         | ICC2 | 0.743 | 21.75  | 19 | 19 | 4.31E-09 | 0.018  | 0.913 | v5.3 vs. v6.0 | OASIS |
| LH_precentral_thickavg         | ICC2 | 0.828 | 31.43  | 19 | 19 | 1.65E-10 | 0.129  | 0.944 | v5.3 vs. v7.1 | OASIS |
| LH_precentral_thickavg         | ICC3 | 0.912 | 21.69  | 19 | 19 | 4.42E-09 | 0.818  | 0.958 | v6.0          | OASIS |
| LH_precentral_thickavg         | ICC2 | 0.946 | 48.47  | 19 | 19 | 3.24E-12 | 0.852  | 0.977 | v6.0 vs. v7.1 | OASIS |
| LH_precentral_thickavg         | ICC3 | 0.594 | 3.92   | 19 | 19 | 2.27E-03 | 0.288  | 0.790 | v7.1          | OASIS |
| LH_precuneus_surfavg           | ICC3 | 0.964 | 55.11  | 19 | 19 | 9.98E-13 | 0.924  | 0.983 | v5.3          | OASIS |
| LH_precuneus_surfavg           | ICC2 | 0.970 | 85.32  | 19 | 19 | 1.75E-14 | 0.922  | 0.987 | v5.3 vs. v6.0 | OASIS |
| LH_precuneus_surfavg           | ICC2 | 0.965 | 87.74  | 19 | 19 | 1.35E-14 | 0.873  | 0.987 | v5.3 vs. v7.1 | OASIS |
| LH_precuneus_surfavg           | ICC3 | 0.988 | 165.51 | 19 | 19 | 3.56E-17 | 0.974  | 0.994 | v6.0          | OASIS |
| LH_precuneus_surfavg           | ICC2 | 0.993 | 320.44 | 19 | 19 | 7.04E-20 | 0.986  | 0.997 | v6.0 vs. v7.1 | OASIS |
| LH_precuneus_surfavg           | ICC3 | 0.850 | 12.31  | 19 | 19 | 5.46E-07 | 0.700  | 0.928 | v7.1          | OASIS |
| LH_precuneus_thickavg          | ICC3 | 0.818 | 9.98   | 19 | 19 | 2.96E-06 | 0.643  | 0.912 | v5.3          | OASIS |
| LH_precuneus_thickavg          | ICC2 | 0.766 | 20.39  | 19 | 19 | 7.56E-09 | 0.080  | 0.919 | v5.3 vs. v6.0 | OASIS |
| LH_precuneus_thickavg          | ICC2 | 0.861 | 15.96  | 19 | 19 | 6.21E-08 | 0.697  | 0.936 | v5.3 vs. v7.1 | OASIS |
| LH_precuneus_thickavg          | ICC3 | 0.901 | 19.15  | 19 | 19 | 1.31E-08 | 0.797  | 0.953 | v6.0          | OASIS |
| LH_precuneus_thickavg          | ICC2 | 0.847 | 22.15  | 19 | 19 | 3.67E-09 | 0.433  | 0.943 | v6.0 vs. v7.1 | OASIS |
| LH_precuneus_thickavg          | ICC3 | 0.933 | 28.83  | 19 | 19 | 3.57E-10 | 0.860  | 0.969 | v7.1          | OASIS |
| LH_Putamen                     | ICC3 | 0.836 | 11.19  | 19 | 19 | 1.19E-06 | 0.675  | 0.921 | v5.3          | OASIS |



|                                      |      |       |        |    |    |          |        |       |               |       |
|--------------------------------------|------|-------|--------|----|----|----------|--------|-------|---------------|-------|
| LH_Putamen                           | ICC2 | 0.378 | 8.43   | 19 | 19 | 1.12E-05 | -0.058 | 0.708 | v5.3 vs. v6.0 | OASIS |
| LH_Putamen                           | ICC2 | 0.378 | 7.91   | 19 | 19 | 1.82E-05 | -0.061 | 0.707 | v5.3 vs. v7.1 | OASIS |
| LH_Putamen                           | ICC3 | 0.964 | 54.51  | 19 | 19 | 1.10E-12 | 0.923  | 0.983 | v6.0          | OASIS |
| LH_Putamen                           | ICC2 | 0.989 | 172.59 | 19 | 19 | 2.40E-17 | 0.976  | 0.995 | v6.0 vs. v7.1 | OASIS |
| LH_Putamen                           | ICC3 | 0.978 | 90.44  | 19 | 19 | 1.02E-14 | 0.953  | 0.990 | v7.1          | OASIS |
| LH_rostralanteriorcingulate_surfavg  | ICC3 | 0.934 | 29.37  | 19 | 19 | 3.03E-10 | 0.862  | 0.969 | v5.3          | OASIS |
| LH_rostralanteriorcingulate_surfavg  | ICC2 | 0.928 | 27.65  | 19 | 19 | 5.18E-10 | 0.851  | 0.966 | v5.3 vs. v6.0 | OASIS |
| LH_rostralanteriorcingulate_surfavg  | ICC2 | 0.824 | 11.75  | 19 | 19 | 7.98E-07 | 0.644  | 0.916 | v5.3 vs. v7.1 | OASIS |
| LH_rostralanteriorcingulate_surfavg  | ICC3 | 0.931 | 28.00  | 19 | 19 | 4.63E-10 | 0.856  | 0.968 | v6.0          | OASIS |
| LH_rostralanteriorcingulate_surfavg  | ICC2 | 0.867 | 23.50  | 19 | 19 | 2.19E-09 | 0.543  | 0.949 | v6.0 vs. v7.1 | OASIS |
| LH_rostralanteriorcingulate_surfavg  | ICC3 | 0.856 | 12.91  | 19 | 19 | 3.68E-07 | 0.712  | 0.931 | v7.1          | OASIS |
| LH_rostralanteriorcingulate_thickavg | ICC3 | 0.577 | 3.73   | 19 | 19 | 3.06E-03 | 0.265  | 0.780 | v5.3          | OASIS |
| LH_rostralanteriorcingulate_thickavg | ICC2 | 0.769 | 9.89   | 19 | 19 | 3.20E-06 | 0.494  | 0.893 | v5.3 vs. v6.0 | OASIS |
| LH_rostralanteriorcingulate_thickavg | ICC2 | 0.789 | 10.31  | 19 | 19 | 2.30E-06 | 0.557  | 0.901 | v5.3 vs. v7.1 | OASIS |
| LH_rostralanteriorcingulate_thickavg | ICC3 | 0.789 | 8.49   | 19 | 19 | 1.06E-05 | 0.593  | 0.897 | v6.0          | OASIS |
| LH_rostralanteriorcingulate_thickavg | ICC2 | 0.640 | 11.91  | 19 | 19 | 7.16E-07 | -0.007 | 0.862 | v6.0 vs. v7.1 | OASIS |
| LH_rostralanteriorcingulate_thickavg | ICC3 | 0.712 | 5.94   | 19 | 19 | 1.47E-04 | 0.465  | 0.856 | v7.1          | OASIS |
| LH_rostralmiddlefrontal_surfavg      | ICC3 | 0.975 | 80.48  | 19 | 19 | 3.01E-14 | 0.948  | 0.989 | v5.3          | OASIS |
| LH_rostralmiddlefrontal_surfavg      | ICC2 | 0.946 | 34.20  | 19 | 19 | 7.70E-11 | 0.886  | 0.975 | v5.3 vs. v6.0 | OASIS |
| LH_rostralmiddlefrontal_surfavg      | ICC2 | 0.927 | 27.43  | 19 | 19 | 5.57E-10 | 0.850  | 0.966 | v5.3 vs. v7.1 | OASIS |
| LH_rostralmiddlefrontal_surfavg      | ICC3 | 0.985 | 130.94 | 19 | 19 | 3.21E-16 | 0.967  | 0.993 | v6.0          | OASIS |
| LH_rostralmiddlefrontal_surfavg      | ICC2 | 0.986 | 183.53 | 19 | 19 | 1.35E-17 | 0.961  | 0.994 | v6.0 vs. v7.1 | OASIS |
| LH_rostralmiddlefrontal_surfavg      | ICC3 | 0.909 | 21.05  | 19 | 19 | 5.73E-09 | 0.813  | 0.957 | v7.1          | OASIS |
| LH_rostralmiddlefrontal_thickavg     | ICC3 | 0.719 | 6.12   | 19 | 19 | 1.19E-04 | 0.477  | 0.860 | v5.3          | OASIS |
| LH_rostralmiddlefrontal_thickavg     | ICC2 | 0.885 | 21.03  | 19 | 19 | 5.78E-09 | 0.720  | 0.949 | v5.3 vs. v6.0 | OASIS |
| LH_rostralmiddlefrontal_thickavg     | ICC2 | 0.824 | 10.93  | 19 | 19 | 1.44E-06 | 0.656  | 0.914 | v5.3 vs. v7.1 | OASIS |
| LH_rostralmiddlefrontal_thickavg     | ICC3 | 0.904 | 19.86  | 19 | 19 | 9.51E-09 | 0.803  | 0.955 | v6.0          | OASIS |
| LH_rostralmiddlefrontal_thickavg     | ICC2 | 0.895 | 17.90  | 19 | 19 | 2.34E-08 | 0.788  | 0.950 | v6.0 vs. v7.1 | OASIS |
| LH_rostralmiddlefrontal_thickavg     | ICC3 | 0.892 | 17.57  | 19 | 19 | 2.74E-08 | 0.780  | 0.949 | v7.1          | OASIS |
| LH_superiorfrontal_surfavg           | ICC3 | 0.976 | 80.68  | 19 | 19 | 2.94E-14 | 0.948  | 0.989 | v5.3          | OASIS |
| LH_superiorfrontal_surfavg           | ICC2 | 0.899 | 38.64  | 19 | 19 | 2.56E-11 | 0.499  | 0.965 | v5.3 vs. v6.0 | OASIS |
| LH_superiorfrontal_surfavg           | ICC2 | 0.823 | 45.46  | 19 | 19 | 5.83E-12 | 0.032  | 0.947 | v5.3 vs. v7.1 | OASIS |
| LH_superiorfrontal_surfavg           | ICC3 | 0.985 | 131.89 | 19 | 19 | 3.00E-16 | 0.968  | 0.993 | v6.0          | OASIS |
| LH_superiorfrontal_surfavg           | ICC2 | 0.958 | 112.43 | 19 | 19 | 1.34E-15 | 0.659  | 0.987 | v6.0 vs. v7.1 | OASIS |
| LH_superiorfrontal_surfavg           | ICC3 | 0.879 | 15.56  | 19 | 19 | 7.73E-08 | 0.755  | 0.942 | v7.1          | OASIS |
| LH_superiorfrontal_thickavg          | ICC3 | 0.787 | 8.40   | 19 | 19 | 1.14E-05 | 0.590  | 0.896 | v5.3          | OASIS |
| LH_superiorfrontal_thickavg          | ICC2 | 0.942 | 39.42  | 19 | 19 | 2.14E-11 | 0.865  | 0.974 | v5.3 vs. v6.0 | OASIS |
| LH_superiorfrontal_thickavg          | ICC2 | 0.901 | 18.80  | 19 | 19 | 1.53E-08 | 0.799  | 0.953 | v5.3 vs. v7.1 | OASIS |
| LH_superiorfrontal_thickavg          | ICC3 | 0.870 | 14.39  | 19 | 19 | 1.49E-07 | 0.738  | 0.938 | v6.0          | OASIS |
| LH_superiorfrontal_thickavg          | ICC2 | 0.944 | 35.26  | 19 | 19 | 5.86E-11 | 0.883  | 0.973 | v6.0 vs. v7.1 | OASIS |
| LH_superiorfrontal_thickavg          | ICC3 | 0.848 | 12.13  | 19 | 19 | 6.17E-07 | 0.697  | 0.927 | v7.1          | OASIS |
| LH_superiorparietal_surfavg          | ICC3 | 0.812 | 9.66   | 19 | 19 | 3.84E-06 | 0.633  | 0.909 | v5.3          | OASIS |
| LH_superiorparietal_surfavg          | ICC2 | 0.950 | 37.44  | 19 | 19 | 3.40E-11 | 0.895  | 0.977 | v5.3 vs. v6.0 | OASIS |
| LH_superiorparietal_surfavg          | ICC2 | 0.954 | 43.56  | 19 | 19 | 8.61E-12 | 0.904  | 0.978 | v5.3 vs. v7.1 | OASIS |

|                              |      |       |        |    |    |          |        |       |               |       |
|------------------------------|------|-------|--------|----|----|----------|--------|-------|---------------|-------|
| LH_superiorparietal_surfvag  | ICC3 | 0.996 | 503.72 | 19 | 19 | 9.77E-22 | 0.991  | 0.998 | v6.0          | OASIS |
| LH_superiorparietal_surfvag  | ICC2 | 0.990 | 275.05 | 19 | 19 | 2.98E-19 | 0.967  | 0.996 | v6.0 vs. v7.1 | OASIS |
| LH_superiorparietal_surfvag  | ICC3 | 0.708 | 5.85   | 19 | 19 | 1.65E-04 | 0.459  | 0.854 | v7.1          | OASIS |
| LH_superiorparietal_thickavg | ICC3 | 0.865 | 13.76  | 19 | 19 | 2.16E-07 | 0.728  | 0.935 | v5.3          | OASIS |
| LH_superiorparietal_thickavg | ICC2 | 0.827 | 29.81  | 19 | 19 | 2.65E-10 | 0.144  | 0.943 | v5.3 vs. v6.0 | OASIS |
| LH_superiorparietal_thickavg | ICC2 | 0.833 | 23.82  | 19 | 19 | 1.94E-09 | 0.293  | 0.941 | v5.3 vs. v7.1 | OASIS |
| LH_superiorparietal_thickavg | ICC3 | 0.934 | 29.40  | 19 | 19 | 3.00E-10 | 0.863  | 0.969 | v6.0          | OASIS |
| LH_superiorparietal_thickavg | ICC2 | 0.936 | 29.42  | 19 | 19 | 2.98E-10 | 0.867  | 0.970 | v6.0 vs. v7.1 | OASIS |
| LH_superiorparietal_thickavg | ICC3 | 0.935 | 29.58  | 19 | 19 | 2.84E-10 | 0.863  | 0.969 | v7.1          | OASIS |
| LH_superiortemporal_surfvag  | ICC3 | 0.987 | 148.25 | 19 | 19 | 1.00E-16 | 0.971  | 0.994 | v5.3          | OASIS |
| LH_superiortemporal_surfvag  | ICC2 | 0.905 | 59.70  | 19 | 19 | 4.78E-13 | 0.295  | 0.971 | v5.3 vs. v6.0 | OASIS |
| LH_superiortemporal_surfvag  | ICC2 | 0.853 | 42.51  | 19 | 19 | 1.07E-11 | 0.121  | 0.954 | v5.3 vs. v7.1 | OASIS |
| LH_superiortemporal_surfvag  | ICC3 | 0.993 | 301.56 | 19 | 19 | 1.25E-19 | 0.986  | 0.997 | v6.0          | OASIS |
| LH_superiortemporal_surfvag  | ICC2 | 0.989 | 391.20 | 19 | 19 | 1.07E-20 | 0.920  | 0.996 | v6.0 vs. v7.1 | OASIS |
| LH_superiortemporal_surfvag  | ICC3 | 0.988 | 159.05 | 19 | 19 | 5.18E-17 | 0.973  | 0.994 | v7.1          | OASIS |
| LH_superiortemporal_thickavg | ICC3 | 0.708 | 5.86   | 19 | 19 | 1.63E-04 | 0.460  | 0.854 | v5.3          | OASIS |
| LH_superiortemporal_thickavg | ICC2 | 0.826 | 28.11  | 19 | 19 | 4.48E-10 | 0.167  | 0.942 | v5.3 vs. v6.0 | OASIS |
| LH_superiortemporal_thickavg | ICC2 | 0.883 | 15.51  | 19 | 19 | 7.95E-08 | 0.763  | 0.945 | v5.3 vs. v7.1 | OASIS |
| LH_superiortemporal_thickavg | ICC3 | 0.648 | 4.69   | 19 | 19 | 7.40E-04 | 0.367  | 0.821 | v6.0          | OASIS |
| LH_superiortemporal_thickavg | ICC2 | 0.773 | 16.60  | 19 | 19 | 4.45E-08 | 0.196  | 0.916 | v6.0 vs. v7.1 | OASIS |
| LH_superiortemporal_thickavg | ICC3 | 0.824 | 10.38  | 19 | 19 | 2.17E-06 | 0.655  | 0.915 | v7.1          | OASIS |
| LH_supramarginal_surfvag     | ICC3 | 0.980 | 99.95  | 19 | 19 | 4.01E-15 | 0.958  | 0.991 | v5.3          | OASIS |
| LH_supramarginal_surfvag     | ICC2 | 0.827 | 24.77  | 19 | 19 | 1.37E-09 | 0.232  | 0.940 | v5.3 vs. v6.0 | OASIS |
| LH_supramarginal_surfvag     | ICC2 | 0.788 | 21.27  | 19 | 19 | 5.23E-09 | 0.133  | 0.926 | v5.3 vs. v7.1 | OASIS |
| LH_supramarginal_surfvag     | ICC3 | 0.984 | 122.68 | 19 | 19 | 5.91E-16 | 0.965  | 0.993 | v6.0          | OASIS |
| LH_supramarginal_surfvag     | ICC2 | 0.992 | 392.51 | 19 | 19 | 1.03E-20 | 0.972  | 0.997 | v6.0 vs. v7.1 | OASIS |
| LH_supramarginal_surfvag     | ICC3 | 0.970 | 64.98  | 19 | 19 | 2.19E-13 | 0.935  | 0.986 | v7.1          | OASIS |
| LH_supramarginal_thickavg    | ICC3 | 0.917 | 23.05  | 19 | 19 | 2.59E-09 | 0.828  | 0.961 | v5.3          | OASIS |
| LH_supramarginal_thickavg    | ICC2 | 0.938 | 55.97  | 19 | 19 | 8.66E-13 | 0.719  | 0.978 | v5.3 vs. v6.0 | OASIS |
| LH_supramarginal_thickavg    | ICC2 | 0.877 | 16.23  | 19 | 19 | 5.40E-08 | 0.753  | 0.941 | v5.3 vs. v7.1 | OASIS |
| LH_supramarginal_thickavg    | ICC3 | 0.942 | 33.44  | 19 | 19 | 9.43E-11 | 0.878  | 0.973 | v6.0          | OASIS |
| LH_supramarginal_thickavg    | ICC2 | 0.848 | 25.01  | 19 | 19 | 1.26E-09 | 0.358  | 0.946 | v6.0 vs. v7.1 | OASIS |
| LH_supramarginal_thickavg    | ICC3 | 0.894 | 17.81  | 19 | 19 | 2.44E-08 | 0.783  | 0.950 | v7.1          | OASIS |
| LH_SurfArea                  | ICC3 | 0.995 | 368.64 | 19 | 19 | 1.87E-20 | 0.988  | 0.998 | v5.3          | OASIS |
| LH_SurfArea                  | ICC2 | 0.975 | 872.29 | 19 | 19 | 5.38E-24 | 0.241  | 0.994 | v5.3 vs. v6.0 | OASIS |
| LH_SurfArea                  | ICC2 | 0.918 | 538.89 | 19 | 19 | 5.16E-22 | 0.046  | 0.979 | v5.3 vs. v7.1 | OASIS |
| LH_SurfArea                  | ICC3 | 0.996 | 485.00 | 19 | 19 | 1.40E-21 | 0.991  | 0.998 | v6.0          | OASIS |
| LH_SurfArea                  | ICC2 | 0.979 | 691.59 | 19 | 19 | 4.85E-23 | 0.365  | 0.995 | v6.0 vs. v7.1 | OASIS |
| LH_SurfArea                  | ICC3 | 0.993 | 288.00 | 19 | 19 | 1.93E-19 | 0.985  | 0.997 | v7.1          | OASIS |
| LH_temporalpole_surfvag      | ICC3 | 0.716 | 6.05   | 19 | 19 | 1.30E-04 | 0.472  | 0.858 | v5.3          | OASIS |
| LH_temporalpole_surfvag      | ICC2 | 0.555 | 3.47   | 19 | 19 | 4.71E-03 | 0.238  | 0.766 | v5.3 vs. v6.0 | OASIS |
| LH_temporalpole_surfvag      | ICC2 | 0.339 | 2.62   | 19 | 19 | 2.10E-02 | -0.004 | 0.619 | v5.3 vs. v7.1 | OASIS |
| LH_temporalpole_surfvag      | ICC3 | 0.765 | 7.53   | 19 | 19 | 2.64E-05 | 0.553  | 0.885 | v6.0          | OASIS |
| LH_temporalpole_surfvag      | ICC2 | 0.540 | 9.66   | 19 | 19 | 3.85E-06 | -0.052 | 0.812 | v6.0 vs. v7.1 | OASIS |

|                                |      |       |       |    |    |          |        |       |               |       |
|--------------------------------|------|-------|-------|----|----|----------|--------|-------|---------------|-------|
| LH_temporalpole_surfavg        | ICC3 | 0.678 | 5.21  | 19 | 19 | 3.66E-04 | 0.412  | 0.837 | v7.1          | OASIS |
| LH_temporalpole_thickavg       | ICC3 | 0.781 | 8.12  | 19 | 19 | 1.48E-05 | 0.579  | 0.893 | v5.3          | OASIS |
| LH_temporalpole_thickavg       | ICC2 | 0.820 | 9.71  | 19 | 19 | 3.69E-06 | 0.646  | 0.913 | v5.3 vs. v6.0 | OASIS |
| LH_temporalpole_thickavg       | ICC2 | 0.642 | 5.74  | 19 | 19 | 1.88E-04 | 0.317  | 0.823 | v5.3 vs. v7.1 | OASIS |
| LH_temporalpole_thickavg       | ICC3 | 0.651 | 4.73  | 19 | 19 | 6.98E-04 | 0.371  | 0.822 | v6.0          | OASIS |
| LH_temporalpole_thickavg       | ICC2 | 0.732 | 9.71  | 19 | 19 | 3.68E-06 | 0.346  | 0.883 | v6.0 vs. v7.1 | OASIS |
| LH_temporalpole_thickavg       | ICC3 | 0.754 | 7.12  | 19 | 19 | 3.98E-05 | 0.533  | 0.878 | v7.1          | OASIS |
| LH_Thalamus                    | ICC3 | 0.923 | 24.90 | 19 | 19 | 1.31E-09 | 0.840  | 0.964 | v5.3          | OASIS |
| LH_Thalamus                    | ICC2 | 0.865 | 17.90 | 19 | 19 | 2.33E-08 | 0.676  | 0.940 | v5.3 vs. v6.0 | OASIS |
| LH_Thalamus                    | ICC2 | 0.749 | 15.99 | 19 | 19 | 6.11E-08 | 0.122  | 0.908 | v5.3 vs. v7.1 | OASIS |
| LH_Thalamus                    | ICC3 | 0.972 | 69.52 | 19 | 19 | 1.17E-13 | 0.940  | 0.987 | v6.0          | OASIS |
| LH_Thalamus                    | ICC2 | 0.844 | 17.22 | 19 | 19 | 3.26E-08 | 0.570  | 0.934 | v6.0 vs. v7.1 | OASIS |
| LH_Thalamus                    | ICC3 | 0.840 | 11.48 | 19 | 19 | 9.67E-07 | 0.682  | 0.923 | v7.1          | OASIS |
| LH_Thickness                   | ICC3 | 0.798 | 8.91  | 19 | 19 | 7.28E-06 | 0.608  | 0.902 | v5.3          | OASIS |
| LH_Thickness                   | ICC2 | 0.790 | 41.37 | 19 | 19 | 1.38E-11 | 0.002  | 0.936 | v5.3 vs. v6.0 | OASIS |
| LH_Thickness                   | ICC2 | 0.895 | 19.62 | 19 | 19 | 1.06E-08 | 0.784  | 0.950 | v5.3 vs. v7.1 | OASIS |
| LH_Thickness                   | ICC3 | 0.872 | 14.57 | 19 | 19 | 1.35E-07 | 0.741  | 0.939 | v6.0          | OASIS |
| LH_Thickness                   | ICC2 | 0.813 | 22.59 | 19 | 19 | 3.09E-09 | 0.209  | 0.935 | v6.0 vs. v7.1 | OASIS |
| LH_Thickness                   | ICC3 | 0.895 | 18.08 | 19 | 19 | 2.14E-08 | 0.786  | 0.950 | v7.1          | OASIS |
| LH_transversetemporal_surfavg  | ICC3 | 0.949 | 38.21 | 19 | 19 | 2.83E-11 | 0.893  | 0.976 | v5.3          | OASIS |
| LH_transversetemporal_surfavg  | ICC2 | 0.832 | 11.11 | 19 | 19 | 1.26E-06 | 0.672  | 0.918 | v5.3 vs. v6.0 | OASIS |
| LH_transversetemporal_surfavg  | ICC2 | 0.764 | 7.39  | 19 | 19 | 3.03E-05 | 0.553  | 0.883 | v5.3 vs. v7.1 | OASIS |
| LH_transversetemporal_surfavg  | ICC3 | 0.945 | 35.63 | 19 | 19 | 5.33E-11 | 0.885  | 0.974 | v6.0          | OASIS |
| LH_transversetemporal_surfavg  | ICC2 | 0.953 | 39.79 | 19 | 19 | 1.96E-11 | 0.901  | 0.978 | v6.0 vs. v7.1 | OASIS |
| LH_transversetemporal_surfavg  | ICC3 | 0.943 | 34.00 | 19 | 19 | 8.14E-11 | 0.880  | 0.973 | v7.1          | OASIS |
| LH_transversetemporal_thickavg | ICC3 | 0.941 | 33.08 | 19 | 19 | 1.04E-10 | 0.877  | 0.973 | v5.3          | OASIS |
| LH_transversetemporal_thickavg | ICC2 | 0.780 | 31.58 | 19 | 19 | 1.58E-10 | 0.015  | 0.930 | v5.3 vs. v6.0 | OASIS |
| LH_transversetemporal_thickavg | ICC2 | 0.775 | 16.45 | 19 | 19 | 4.81E-08 | 0.211  | 0.917 | v5.3 vs. v7.1 | OASIS |
| LH_transversetemporal_thickavg | ICC3 | 0.882 | 16.00 | 19 | 19 | 6.09E-08 | 0.761  | 0.944 | v6.0          | OASIS |
| LH_transversetemporal_thickavg | ICC2 | 0.954 | 50.76 | 19 | 19 | 2.12E-12 | 0.891  | 0.979 | v6.0 vs. v7.1 | OASIS |
| LH_transversetemporal_thickavg | ICC3 | 0.931 | 28.13 | 19 | 19 | 4.44E-10 | 0.857  | 0.968 | v7.1          | OASIS |
| RH_Accumbens                   | ICC3 | 0.841 | 11.59 | 19 | 19 | 8.92E-07 | 0.685  | 0.923 | v5.3          | OASIS |
| RH_Accumbens                   | ICC2 | 0.574 | 8.41  | 19 | 19 | 1.13E-05 | -0.013 | 0.823 | v5.3 vs. v6.0 | OASIS |
| RH_Accumbens                   | ICC2 | 0.668 | 11.22 | 19 | 19 | 1.16E-06 | 0.052  | 0.870 | v5.3 vs. v7.1 | OASIS |
| RH_Accumbens                   | ICC3 | 0.871 | 14.45 | 19 | 19 | 1.44E-07 | 0.739  | 0.938 | v6.0          | OASIS |
| RH_Accumbens                   | ICC2 | 0.915 | 24.12 | 19 | 19 | 1.74E-09 | 0.825  | 0.960 | v6.0 vs. v7.1 | OASIS |
| RH_Accumbens                   | ICC3 | 0.857 | 12.99 | 19 | 19 | 3.50E-07 | 0.714  | 0.931 | v7.1          | OASIS |
| RH_Amygdala                    | ICC3 | 0.798 | 8.91  | 19 | 19 | 7.25E-06 | 0.609  | 0.902 | v5.3          | OASIS |
| RH_Amygdala                    | ICC2 | 0.863 | 13.11 | 19 | 19 | 3.24E-07 | 0.725  | 0.934 | v5.3 vs. v6.0 | OASIS |
| RH_Amygdala                    | ICC2 | 0.871 | 13.89 | 19 | 19 | 2.00E-07 | 0.740  | 0.938 | v5.3 vs. v7.1 | OASIS |
| RH_Amygdala                    | ICC3 | 0.913 | 21.96 | 19 | 19 | 3.96E-09 | 0.820  | 0.959 | v6.0          | OASIS |
| RH_Amygdala                    | ICC2 | 0.942 | 34.68 | 19 | 19 | 6.80E-11 | 0.880  | 0.973 | v6.0 vs. v7.1 | OASIS |
| RH_Amygdala                    | ICC3 | 0.870 | 14.41 | 19 | 19 | 1.47E-07 | 0.738  | 0.938 | v7.1          | OASIS |
| RH_bankssts_surfavg            | ICC3 | 0.963 | 52.96 | 19 | 19 | 1.44E-12 | 0.921  | 0.983 | v5.3          | OASIS |

|                                     |      |       |        |    |    |          |        |       |               |       |
|-------------------------------------|------|-------|--------|----|----|----------|--------|-------|---------------|-------|
| RH_bankssts_surfavg                 | ICC2 | 0.833 | 14.34  | 19 | 19 | 1.53E-07 | 0.606  | 0.925 | v5.3 vs. v6.0 | OASIS |
| RH_bankssts_surfavg                 | ICC2 | 0.835 | 13.40  | 19 | 19 | 2.70E-07 | 0.644  | 0.923 | v5.3 vs. v7.1 | OASIS |
| RH_bankssts_surfavg                 | ICC3 | 0.966 | 57.26  | 19 | 19 | 7.03E-13 | 0.927  | 0.984 | v6.0          | OASIS |
| RH_bankssts_surfavg                 | ICC2 | 0.968 | 60.77  | 19 | 19 | 4.06E-13 | 0.933  | 0.985 | v6.0 vs. v7.1 | OASIS |
| RH_bankssts_surfavg                 | ICC3 | 0.979 | 92.84  | 19 | 19 | 7.98E-15 | 0.954  | 0.990 | v7.1          | OASIS |
| RH_bankssts_thickavg                | ICC3 | 0.800 | 9.01   | 19 | 19 | 6.67E-06 | 0.612  | 0.903 | v5.3          | OASIS |
| RH_bankssts_thickavg                | ICC2 | 0.817 | 9.85   | 19 | 19 | 3.31E-06 | 0.645  | 0.911 | v5.3 vs. v6.0 | OASIS |
| RH_bankssts_thickavg                | ICC2 | 0.768 | 7.36   | 19 | 19 | 3.12E-05 | 0.556  | 0.886 | v5.3 vs. v7.1 | OASIS |
| RH_bankssts_thickavg                | ICC3 | 0.883 | 16.02  | 19 | 19 | 6.01E-08 | 0.762  | 0.944 | v6.0          | OASIS |
| RH_bankssts_thickavg                | ICC2 | 0.903 | 19.09  | 19 | 19 | 1.34E-08 | 0.802  | 0.954 | v6.0 vs. v7.1 | OASIS |
| RH_bankssts_thickavg                | ICC3 | 0.941 | 32.70  | 19 | 19 | 1.16E-10 | 0.876  | 0.972 | v7.1          | OASIS |
| RH_caudalanteriorcingulate_surfavg  | ICC3 | 0.967 | 58.82  | 19 | 19 | 5.48E-13 | 0.929  | 0.984 | v5.3          | OASIS |
| RH_caudalanteriorcingulate_surfavg  | ICC2 | 0.854 | 41.81  | 19 | 19 | 1.25E-11 | 0.133  | 0.955 | v5.3 vs. v6.0 | OASIS |
| RH_caudalanteriorcingulate_surfavg  | ICC2 | 0.940 | 41.74  | 19 | 19 | 1.27E-11 | 0.843  | 0.974 | v5.3 vs. v7.1 | OASIS |
| RH_caudalanteriorcingulate_surfavg  | ICC3 | 0.961 | 50.33  | 19 | 19 | 2.30E-12 | 0.917  | 0.982 | v6.0          | OASIS |
| RH_caudalanteriorcingulate_surfavg  | ICC2 | 0.922 | 58.45  | 19 | 19 | 5.81E-13 | 0.499  | 0.975 | v6.0 vs. v7.1 | OASIS |
| RH_caudalanteriorcingulate_surfavg  | ICC3 | 0.963 | 52.38  | 19 | 19 | 1.59E-12 | 0.921  | 0.983 | v7.1          | OASIS |
| RH_caudalanteriorcingulate_thickavg | ICC3 | 0.760 | 7.33   | 19 | 19 | 3.23E-05 | 0.543  | 0.882 | v5.3          | OASIS |
| RH_caudalanteriorcingulate_thickavg | ICC2 | 0.878 | 17.54  | 19 | 19 | 2.79E-08 | 0.741  | 0.943 | v5.3 vs. v6.0 | OASIS |
| RH_caudalanteriorcingulate_thickavg | ICC2 | 0.520 | 14.43  | 19 | 19 | 1.46E-07 | -0.051 | 0.811 | v5.3 vs. v7.1 | OASIS |
| RH_caudalanteriorcingulate_thickavg | ICC3 | 0.813 | 9.67   | 19 | 19 | 3.82E-06 | 0.634  | 0.909 | v6.0          | OASIS |
| RH_caudalanteriorcingulate_thickavg | ICC2 | 0.538 | 8.69   | 19 | 19 | 8.79E-06 | -0.045 | 0.808 | v6.0 vs. v7.1 | OASIS |
| RH_caudalanteriorcingulate_thickavg | ICC3 | 0.843 | 11.73  | 19 | 19 | 8.10E-07 | 0.688  | 0.924 | v7.1          | OASIS |
| RH_caudalmiddlefrontal_surfavg      | ICC3 | 0.963 | 53.59  | 19 | 19 | 1.29E-12 | 0.922  | 0.983 | v5.3          | OASIS |
| RH_caudalmiddlefrontal_surfavg      | ICC2 | 0.883 | 16.25  | 19 | 19 | 5.33E-08 | 0.766  | 0.944 | v5.3 vs. v6.0 | OASIS |
| RH_caudalmiddlefrontal_surfavg      | ICC2 | 0.865 | 14.19  | 19 | 19 | 1.68E-07 | 0.731  | 0.935 | v5.3 vs. v7.1 | OASIS |
| RH_caudalmiddlefrontal_surfavg      | ICC3 | 0.984 | 120.93 | 19 | 19 | 6.76E-16 | 0.965  | 0.992 | v6.0          | OASIS |
| RH_caudalmiddlefrontal_surfavg      | ICC2 | 0.970 | 62.39  | 19 | 19 | 3.18E-13 | 0.936  | 0.986 | v6.0 vs. v7.1 | OASIS |
| RH_caudalmiddlefrontal_surfavg      | ICC3 | 0.992 | 243.83 | 19 | 19 | 9.28E-19 | 0.982  | 0.996 | v7.1          | OASIS |
| RH_caudalmiddlefrontal_thickavg     | ICC3 | 0.864 | 13.70  | 19 | 19 | 2.25E-07 | 0.727  | 0.935 | v5.3          | OASIS |
| RH_caudalmiddlefrontal_thickavg     | ICC2 | 0.846 | 14.65  | 19 | 19 | 1.29E-07 | 0.662  | 0.929 | v5.3 vs. v6.0 | OASIS |
| RH_caudalmiddlefrontal_thickavg     | ICC2 | 0.828 | 17.69  | 19 | 19 | 2.58E-08 | 0.453  | 0.932 | v5.3 vs. v7.1 | OASIS |
| RH_caudalmiddlefrontal_thickavg     | ICC3 | 0.775 | 7.91   | 19 | 19 | 1.82E-05 | 0.570  | 0.890 | v6.0          | OASIS |
| RH_caudalmiddlefrontal_thickavg     | ICC2 | 0.909 | 23.84  | 19 | 19 | 1.93E-09 | 0.803  | 0.958 | v6.0 vs. v7.1 | OASIS |
| RH_caudalmiddlefrontal_thickavg     | ICC3 | 0.842 | 11.66  | 19 | 19 | 8.48E-07 | 0.686  | 0.924 | v7.1          | OASIS |
| RH_Caudate                          | ICC3 | 0.953 | 41.20  | 19 | 19 | 1.43E-11 | 0.900  | 0.978 | v5.3          | OASIS |
| RH_Caudate                          | ICC2 | 0.865 | 43.24  | 19 | 19 | 9.19E-12 | 0.168  | 0.958 | v5.3 vs. v6.0 | OASIS |
| RH_Caudate                          | ICC2 | 0.951 | 50.17  | 19 | 19 | 2.37E-12 | 0.878  | 0.979 | v5.3 vs. v7.1 | OASIS |
| RH_Caudate                          | ICC3 | 0.972 | 70.33  | 19 | 19 | 1.05E-13 | 0.940  | 0.987 | v6.0          | OASIS |
| RH_Caudate                          | ICC2 | 0.933 | 81.96  | 19 | 19 | 2.55E-14 | 0.426  | 0.979 | v6.0 vs. v7.1 | OASIS |
| RH_Caudate                          | ICC3 | 0.985 | 130.87 | 19 | 19 | 3.23E-16 | 0.967  | 0.993 | v7.1          | OASIS |
| RH_cuneus_surfavg                   | ICC3 | 0.870 | 14.41  | 19 | 19 | 1.47E-07 | 0.738  | 0.938 | v5.3          | OASIS |
| RH_cuneus_surfavg                   | ICC2 | 0.743 | 13.93  | 19 | 19 | 1.96E-07 | 0.171  | 0.902 | v5.3 vs. v6.0 | OASIS |
| RH_cuneus_surfavg                   | ICC2 | 0.606 | 13.28  | 19 | 19 | 2.91E-07 | -0.042 | 0.852 | v5.3 vs. v7.1 | OASIS |

|                         |      |       |        |    |    |          |        |       |               |       |
|-------------------------|------|-------|--------|----|----|----------|--------|-------|---------------|-------|
| RH_cuneus_surfavg       | ICC3 | 0.990 | 208.78 | 19 | 19 | 4.01E-18 | 0.979  | 0.996 | v6.0          | OASIS |
| RH_cuneus_surfavg       | ICC2 | 0.924 | 79.55  | 19 | 19 | 3.36E-14 | 0.332  | 0.977 | v6.0 vs. v7.1 | OASIS |
| RH_cuneus_surfavg       | ICC3 | 0.992 | 248.95 | 19 | 19 | 7.63E-19 | 0.983  | 0.996 | v7.1          | OASIS |
| RH_cuneus_thickavg      | ICC3 | 0.937 | 30.61  | 19 | 19 | 2.09E-10 | 0.868  | 0.970 | v5.3          | OASIS |
| RH_cuneus_thickavg      | ICC2 | 0.886 | 45.00  | 19 | 19 | 6.39E-12 | 0.289  | 0.964 | v5.3 vs. v6.0 | OASIS |
| RH_cuneus_thickavg      | ICC2 | 0.890 | 16.82  | 19 | 19 | 3.98E-08 | 0.778  | 0.948 | v5.3 vs. v7.1 | OASIS |
| RH_cuneus_thickavg      | ICC3 | 0.931 | 27.99  | 19 | 19 | 4.65E-10 | 0.856  | 0.968 | v6.0          | OASIS |
| RH_cuneus_thickavg      | ICC2 | 0.866 | 25.59  | 19 | 19 | 1.03E-09 | 0.480  | 0.950 | v6.0 vs. v7.1 | OASIS |
| RH_cuneus_thickavg      | ICC3 | 0.905 | 19.96  | 19 | 19 | 9.12E-09 | 0.804  | 0.955 | v7.1          | OASIS |
| RH_entorhinal_surfavg   | ICC3 | 0.871 | 14.47  | 19 | 19 | 1.43E-07 | 0.739  | 0.938 | v5.3          | OASIS |
| RH_entorhinal_surfavg   | ICC2 | 0.549 | 8.46   | 19 | 19 | 1.08E-05 | -0.036 | 0.812 | v5.3 vs. v6.0 | OASIS |
| RH_entorhinal_surfavg   | ICC2 | 0.594 | 8.37   | 19 | 19 | 1.18E-05 | 0.014  | 0.831 | v5.3 vs. v7.1 | OASIS |
| RH_entorhinal_surfavg   | ICC3 | 0.911 | 21.50  | 19 | 19 | 4.76E-09 | 0.817  | 0.958 | v6.0          | OASIS |
| RH_entorhinal_surfavg   | ICC2 | 0.835 | 11.84  | 19 | 19 | 7.51E-07 | 0.676  | 0.920 | v6.0 vs. v7.1 | OASIS |
| RH_entorhinal_surfavg   | ICC3 | 0.914 | 22.23  | 19 | 19 | 3.56E-09 | 0.822  | 0.959 | v7.1          | OASIS |
| RH_entorhinal_thickavg  | ICC3 | 0.872 | 14.57  | 19 | 19 | 1.34E-07 | 0.741  | 0.939 | v5.3          | OASIS |
| RH_entorhinal_thickavg  | ICC2 | 0.820 | 11.90  | 19 | 19 | 7.22E-07 | 0.625  | 0.915 | v5.3 vs. v6.0 | OASIS |
| RH_entorhinal_thickavg  | ICC2 | 0.781 | 9.12   | 19 | 19 | 6.06E-06 | 0.573  | 0.894 | v5.3 vs. v7.1 | OASIS |
| RH_entorhinal_thickavg  | ICC3 | 0.858 | 13.04  | 19 | 19 | 3.39E-07 | 0.715  | 0.932 | v6.0          | OASIS |
| RH_entorhinal_thickavg  | ICC2 | 0.745 | 16.70  | 19 | 19 | 4.23E-08 | 0.094  | 0.908 | v6.0 vs. v7.1 | OASIS |
| RH_entorhinal_thickavg  | ICC3 | 0.890 | 17.15  | 19 | 19 | 3.37E-08 | 0.776  | 0.948 | v7.1          | OASIS |
| RH_frontalpole_surfavg  | ICC3 | 0.757 | 7.23   | 19 | 19 | 3.57E-05 | 0.538  | 0.880 | v5.3          | OASIS |
| RH_frontalpole_surfavg  | ICC2 | 0.457 | 3.41   | 19 | 19 | 5.19E-03 | 0.097  | 0.707 | v5.3 vs. v6.0 | OASIS |
| RH_frontalpole_surfavg  | ICC2 | 0.238 | 2.71   | 19 | 19 | 1.78E-02 | -0.073 | 0.536 | v5.3 vs. v7.1 | OASIS |
| RH_frontalpole_surfavg  | ICC3 | 0.918 | 23.30  | 19 | 19 | 2.35E-09 | 0.830  | 0.961 | v6.0          | OASIS |
| RH_frontalpole_surfavg  | ICC2 | 0.618 | 12.05  | 19 | 19 | 6.48E-07 | -0.028 | 0.854 | v6.0 vs. v7.1 | OASIS |
| RH_frontalpole_surfavg  | ICC3 | 0.858 | 13.08  | 19 | 19 | 3.31E-07 | 0.716  | 0.932 | v7.1          | OASIS |
| RH_frontalpole_thickavg | ICC3 | 0.792 | 8.60   | 19 | 19 | 9.55E-06 | 0.597  | 0.898 | v5.3          | OASIS |
| RH_frontalpole_thickavg | ICC2 | 0.766 | 8.68   | 19 | 19 | 8.88E-06 | 0.539  | 0.886 | v5.3 vs. v6.0 | OASIS |
| RH_frontalpole_thickavg | ICC2 | 0.774 | 8.45   | 19 | 19 | 1.09E-05 | 0.570  | 0.889 | v5.3 vs. v7.1 | OASIS |
| RH_frontalpole_thickavg | ICC3 | 0.774 | 7.87   | 19 | 19 | 1.88E-05 | 0.568  | 0.889 | v6.0          | OASIS |
| RH_frontalpole_thickavg | ICC2 | 0.855 | 12.53  | 19 | 19 | 4.71E-07 | 0.712  | 0.930 | v6.0 vs. v7.1 | OASIS |
| RH_frontalpole_thickavg | ICC3 | 0.851 | 12.44  | 19 | 19 | 5.00E-07 | 0.703  | 0.929 | v7.1          | OASIS |
| RH_fusiform_surfavg     | ICC3 | 0.979 | 92.93  | 19 | 19 | 7.91E-15 | 0.954  | 0.990 | v5.3          | OASIS |
| RH_fusiform_surfavg     | ICC2 | 0.868 | 45.52  | 19 | 19 | 5.76E-12 | 0.167  | 0.959 | v5.3 vs. v6.0 | OASIS |
| RH_fusiform_surfavg     | ICC2 | 0.889 | 40.58  | 19 | 19 | 1.64E-11 | 0.374  | 0.963 | v5.3 vs. v7.1 | OASIS |
| RH_fusiform_surfavg     | ICC3 | 0.973 | 72.60  | 19 | 19 | 7.84E-14 | 0.942  | 0.987 | v6.0          | OASIS |
| RH_fusiform_surfavg     | ICC2 | 0.981 | 116.30 | 19 | 19 | 9.74E-16 | 0.958  | 0.991 | v6.0 vs. v7.1 | OASIS |
| RH_fusiform_surfavg     | ICC3 | 0.985 | 133.05 | 19 | 19 | 2.76E-16 | 0.968  | 0.993 | v7.1          | OASIS |
| RH_fusiform_thickavg    | ICC3 | 0.596 | 3.95   | 19 | 19 | 2.19E-03 | 0.291  | 0.791 | v5.3          | OASIS |
| RH_fusiform_thickavg    | ICC2 | 0.597 | 7.61   | 19 | 19 | 2.42E-05 | 0.050  | 0.827 | v5.3 vs. v6.0 | OASIS |
| RH_fusiform_thickavg    | ICC2 | 0.581 | 4.73   | 19 | 19 | 6.97E-04 | 0.237  | 0.787 | v5.3 vs. v7.1 | OASIS |
| RH_fusiform_thickavg    | ICC3 | 0.683 | 5.32   | 19 | 19 | 3.20E-04 | 0.421  | 0.840 | v6.0          | OASIS |
| RH_fusiform_thickavg    | ICC2 | 0.843 | 13.18  | 19 | 19 | 3.09E-07 | 0.681  | 0.925 | v6.0 vs. v7.1 | OASIS |

|                              |      |       |        |    |    |          |        |       |               |       |
|------------------------------|------|-------|--------|----|----|----------|--------|-------|---------------|-------|
| RH_fusiform_thickavg         | ICC3 | 0.766 | 7.56   | 19 | 19 | 2.56E-05 | 0.554  | 0.885 | v7.1          | OASIS |
| RH_Hippocampus               | ICC3 | 0.945 | 35.10  | 19 | 19 | 6.10E-11 | 0.884  | 0.974 | v5.3          | OASIS |
| RH_Hippocampus               | ICC2 | 0.906 | 19.59  | 19 | 19 | 1.07E-08 | 0.807  | 0.955 | v5.3 vs. v6.0 | OASIS |
| RH_Hippocampus               | ICC2 | 0.944 | 33.73  | 19 | 19 | 8.74E-11 | 0.883  | 0.973 | v5.3 vs. v7.1 | OASIS |
| RH_Hippocampus               | ICC3 | 0.945 | 35.14  | 19 | 19 | 6.04E-11 | 0.884  | 0.974 | v6.0          | OASIS |
| RH_Hippocampus               | ICC2 | 0.939 | 30.00  | 19 | 19 | 2.50E-10 | 0.871  | 0.971 | v6.0 vs. v7.1 | OASIS |
| RH_Hippocampus               | ICC3 | 0.972 | 70.46  | 19 | 19 | 1.03E-13 | 0.940  | 0.987 | v7.1          | OASIS |
| RH_inferiorparietal_surfavg  | ICC3 | 0.995 | 434.70 | 19 | 19 | 3.94E-21 | 0.990  | 0.998 | v5.3          | OASIS |
| RH_inferiorparietal_surfavg  | ICC2 | 0.950 | 47.17  | 19 | 19 | 4.16E-12 | 0.882  | 0.978 | v5.3 vs. v6.0 | OASIS |
| RH_inferiorparietal_surfavg  | ICC2 | 0.957 | 44.19  | 19 | 19 | 7.55E-12 | 0.909  | 0.980 | v5.3 vs. v7.1 | OASIS |
| RH_inferiorparietal_surfavg  | ICC3 | 0.994 | 342.55 | 19 | 19 | 3.75E-20 | 0.987  | 0.997 | v6.0          | OASIS |
| RH_inferiorparietal_surfavg  | ICC2 | 0.984 | 166.65 | 19 | 19 | 3.34E-17 | 0.953  | 0.993 | v6.0 vs. v7.1 | OASIS |
| RH_inferiorparietal_surfavg  | ICC3 | 0.989 | 176.40 | 19 | 19 | 1.96E-17 | 0.976  | 0.995 | v7.1          | OASIS |
| RH_inferiorparietal_thickavg | ICC3 | 0.826 | 10.50  | 19 | 19 | 1.98E-06 | 0.658  | 0.916 | v5.3          | OASIS |
| RH_inferiorparietal_thickavg | ICC2 | 0.802 | 9.21   | 19 | 19 | 5.60E-06 | 0.620  | 0.903 | v5.3 vs. v6.0 | OASIS |
| RH_inferiorparietal_thickavg | ICC2 | 0.791 | 8.24   | 19 | 19 | 1.33E-05 | 0.595  | 0.898 | v5.3 vs. v7.1 | OASIS |
| RH_inferiorparietal_thickavg | ICC3 | 0.885 | 16.33  | 19 | 19 | 5.13E-08 | 0.766  | 0.945 | v6.0          | OASIS |
| RH_inferiorparietal_thickavg | ICC2 | 0.885 | 20.19  | 19 | 19 | 8.26E-09 | 0.737  | 0.948 | v6.0 vs. v7.1 | OASIS |
| RH_inferiorparietal_thickavg | ICC3 | 0.789 | 8.47   | 19 | 19 | 1.08E-05 | 0.592  | 0.897 | v7.1          | OASIS |
| RH_inferiortemporal_surfavg  | ICC3 | 0.978 | 90.94  | 19 | 19 | 9.67E-15 | 0.953  | 0.990 | v5.3          | OASIS |
| RH_inferiortemporal_surfavg  | ICC2 | 0.881 | 29.75  | 19 | 19 | 2.70E-10 | 0.505  | 0.957 | v5.3 vs. v6.0 | OASIS |
| RH_inferiortemporal_surfavg  | ICC2 | 0.838 | 28.68  | 19 | 19 | 3.73E-10 | 0.212  | 0.946 | v5.3 vs. v7.1 | OASIS |
| RH_inferiortemporal_surfavg  | ICC3 | 0.981 | 105.62 | 19 | 19 | 2.40E-15 | 0.960  | 0.991 | v6.0          | OASIS |
| RH_inferiortemporal_surfavg  | ICC2 | 0.973 | 105.57 | 19 | 19 | 2.41E-15 | 0.908  | 0.989 | v6.0 vs. v7.1 | OASIS |
| RH_inferiortemporal_surfavg  | ICC3 | 0.986 | 140.70 | 19 | 19 | 1.64E-16 | 0.970  | 0.993 | v7.1          | OASIS |
| RH_inferiortemporal_thickavg | ICC3 | 0.640 | 4.55   | 19 | 19 | 8.92E-04 | 0.355  | 0.816 | v5.3          | OASIS |
| RH_inferiortemporal_thickavg | ICC2 | 0.719 | 7.24   | 19 | 19 | 3.52E-05 | 0.454  | 0.863 | v5.3 vs. v6.0 | OASIS |
| RH_inferiortemporal_thickavg | ICC2 | 0.700 | 6.01   | 19 | 19 | 1.36E-04 | 0.453  | 0.849 | v5.3 vs. v7.1 | OASIS |
| RH_inferiortemporal_thickavg | ICC3 | 0.814 | 9.76   | 19 | 19 | 3.55E-06 | 0.636  | 0.910 | v6.0          | OASIS |
| RH_inferiortemporal_thickavg | ICC2 | 0.819 | 9.89   | 19 | 19 | 3.20E-06 | 0.648  | 0.912 | v6.0 vs. v7.1 | OASIS |
| RH_inferiortemporal_thickavg | ICC3 | 0.922 | 24.58  | 19 | 19 | 1.47E-09 | 0.838  | 0.963 | v7.1          | OASIS |
| RH_insula_surfavg            | ICC3 | 0.912 | 21.84  | 19 | 19 | 4.16E-09 | 0.819  | 0.959 | v5.3          | OASIS |
| RH_insula_surfavg            | ICC2 | 0.497 | 6.91   | 19 | 19 | 4.98E-05 | -0.046 | 0.777 | v5.3 vs. v6.0 | OASIS |
| RH_insula_surfavg            | ICC2 | 0.606 | 9.60   | 19 | 19 | 4.03E-06 | -0.003 | 0.842 | v5.3 vs. v7.1 | OASIS |
| RH_insula_surfavg            | ICC3 | 0.577 | 3.72   | 19 | 19 | 3.11E-03 | 0.264  | 0.780 | v6.0          | OASIS |
| RH_insula_surfavg            | ICC2 | 0.697 | 5.44   | 19 | 19 | 2.73E-04 | 0.441  | 0.848 | v6.0 vs. v7.1 | OASIS |
| RH_insula_surfavg            | ICC3 | 0.789 | 8.47   | 19 | 19 | 1.07E-05 | 0.592  | 0.897 | v7.1          | OASIS |
| RH_insula_thickavg           | ICC3 | 0.723 | 6.22   | 19 | 19 | 1.07E-04 | 0.483  | 0.862 | v5.3          | OASIS |
| RH_insula_thickavg           | ICC2 | 0.667 | 8.94   | 19 | 19 | 7.05E-06 | 0.149  | 0.860 | v5.3 vs. v6.0 | OASIS |
| RH_insula_thickavg           | ICC2 | 0.812 | 12.32  | 19 | 19 | 5.43E-07 | 0.578  | 0.914 | v5.3 vs. v7.1 | OASIS |
| RH_insula_thickavg           | ICC3 | 0.867 | 14.02  | 19 | 19 | 1.85E-07 | 0.732  | 0.936 | v6.0          | OASIS |
| RH_insula_thickavg           | ICC2 | 0.588 | 28.16  | 19 | 19 | 4.41E-10 | -0.032 | 0.855 | v6.0 vs. v7.1 | OASIS |
| RH_insula_thickavg           | ICC3 | 0.840 | 11.48  | 19 | 19 | 9.66E-07 | 0.682  | 0.923 | v7.1          | OASIS |
| RH_isthmuscingulate_surfavg  | ICC3 | 0.916 | 22.92  | 19 | 19 | 2.72E-09 | 0.827  | 0.961 | v5.3          | OASIS |

|                                  |      |       |         |    |    |          |        |       |               |       |
|----------------------------------|------|-------|---------|----|----|----------|--------|-------|---------------|-------|
| RH_isthmuscingulate_surfavg      | ICC2 | 0.929 | 26.66   | 19 | 19 | 7.17E-10 | 0.854  | 0.967 | v5.3 vs. v6.0 | OASIS |
| RH_isthmuscingulate_surfavg      | ICC2 | 0.918 | 34.95   | 19 | 19 | 6.34E-11 | 0.743  | 0.967 | v5.3 vs. v7.1 | OASIS |
| RH_isthmuscingulate_surfavg      | ICC3 | 0.964 | 55.32   | 19 | 19 | 9.65E-13 | 0.925  | 0.983 | v6.0          | OASIS |
| RH_isthmuscingulate_surfavg      | ICC2 | 0.927 | 66.30   | 19 | 19 | 1.82E-13 | 0.475  | 0.977 | v6.0 vs. v7.1 | OASIS |
| RH_isthmuscingulate_surfavg      | ICC3 | 0.978 | 90.76   | 19 | 19 | 9.85E-15 | 0.953  | 0.990 | v7.1          | OASIS |
| RH_isthmuscingulate_thickavg     | ICC3 | 0.895 | 18.10   | 19 | 19 | 2.13E-08 | 0.786  | 0.950 | v5.3          | OASIS |
| RH_isthmuscingulate_thickavg     | ICC2 | 0.898 | 19.03   | 19 | 19 | 1.38E-08 | 0.794  | 0.951 | v5.3 vs. v6.0 | OASIS |
| RH_isthmuscingulate_thickavg     | ICC2 | 0.604 | 12.97   | 19 | 19 | 3.55E-07 | -0.042 | 0.850 | v5.3 vs. v7.1 | OASIS |
| RH_isthmuscingulate_thickavg     | ICC3 | 0.899 | 18.76   | 19 | 19 | 1.56E-08 | 0.793  | 0.952 | v6.0          | OASIS |
| RH_isthmuscingulate_thickavg     | ICC2 | 0.669 | 17.22   | 19 | 19 | 3.26E-08 | -0.025 | 0.883 | v6.0 vs. v7.1 | OASIS |
| RH_isthmuscingulate_thickavg     | ICC3 | 0.921 | 24.20   | 19 | 19 | 1.69E-09 | 0.836  | 0.963 | v7.1          | OASIS |
| RH_lateraloccipital_surfavg      | ICC3 | 0.953 | 41.45   | 19 | 19 | 1.35E-11 | 0.901  | 0.978 | v5.3          | OASIS |
| RH_lateraloccipital_surfavg      | ICC2 | 0.678 | 16.24   | 19 | 19 | 5.36E-08 | -0.014 | 0.885 | v5.3 vs. v6.0 | OASIS |
| RH_lateraloccipital_surfavg      | ICC2 | 0.600 | 17.78   | 19 | 19 | 2.48E-08 | -0.045 | 0.855 | v5.3 vs. v7.1 | OASIS |
| RH_lateraloccipital_surfavg      | ICC3 | 0.990 | 197.14  | 19 | 19 | 6.87E-18 | 0.978  | 0.995 | v6.0          | OASIS |
| RH_lateraloccipital_surfavg      | ICC2 | 0.977 | 325.41  | 19 | 19 | 6.09E-20 | 0.605  | 0.994 | v6.0 vs. v7.1 | OASIS |
| RH_lateraloccipital_surfavg      | ICC3 | 0.992 | 253.88  | 19 | 19 | 6.34E-19 | 0.983  | 0.996 | v7.1          | OASIS |
| RH_lateraloccipital_thickavg     | ICC3 | 0.880 | 15.64   | 19 | 19 | 7.38E-08 | 0.757  | 0.943 | v5.3          | OASIS |
| RH_lateraloccipital_thickavg     | ICC2 | 0.888 | 17.31   | 19 | 19 | 3.11E-08 | 0.775  | 0.946 | v5.3 vs. v6.0 | OASIS |
| RH_lateraloccipital_thickavg     | ICC2 | 0.866 | 15.03   | 19 | 19 | 1.04E-07 | 0.730  | 0.936 | v5.3 vs. v7.1 | OASIS |
| RH_lateraloccipital_thickavg     | ICC3 | 0.916 | 22.94   | 19 | 19 | 2.70E-09 | 0.827  | 0.961 | v6.0          | OASIS |
| RH_lateraloccipital_thickavg     | ICC2 | 0.884 | 26.30   | 19 | 19 | 8.09E-10 | 0.603  | 0.955 | v6.0 vs. v7.1 | OASIS |
| RH_lateraloccipital_thickavg     | ICC3 | 0.981 | 104.38  | 19 | 19 | 2.68E-15 | 0.959  | 0.991 | v7.1          | OASIS |
| RH_lateralorbitofrontal_surfavg  | ICC3 | 0.849 | 12.21   | 19 | 19 | 5.84E-07 | 0.698  | 0.927 | v5.3          | OASIS |
| RH_lateralorbitofrontal_surfavg  | ICC2 | 0.813 | 12.56   | 19 | 19 | 4.61E-07 | 0.574  | 0.915 | v5.3 vs. v6.0 | OASIS |
| RH_lateralorbitofrontal_surfavg  | ICC2 | 0.675 | 11.62   | 19 | 19 | 8.72E-07 | 0.055  | 0.874 | v5.3 vs. v7.1 | OASIS |
| RH_lateralorbitofrontal_surfavg  | ICC3 | 0.908 | 20.85   | 19 | 19 | 6.22E-09 | 0.812  | 0.957 | v6.0          | OASIS |
| RH_lateralorbitofrontal_surfavg  | ICC2 | 0.798 | 14.76   | 19 | 19 | 1.20E-07 | 0.394  | 0.919 | v6.0 vs. v7.1 | OASIS |
| RH_lateralorbitofrontal_surfavg  | ICC3 | 0.803 | 9.17    | 19 | 19 | 5.79E-06 | 0.618  | 0.904 | v7.1          | OASIS |
| RH_lateralorbitofrontal_thickavg | ICC3 | 0.673 | 5.12    | 19 | 19 | 4.10E-04 | 0.405  | 0.835 | v5.3          | OASIS |
| RH_lateralorbitofrontal_thickavg | ICC2 | 0.708 | 6.46    | 19 | 19 | 8.11E-05 | 0.458  | 0.854 | v5.3 vs. v6.0 | OASIS |
| RH_lateralorbitofrontal_thickavg | ICC2 | 0.615 | 4.17    | 19 | 19 | 1.55E-03 | 0.324  | 0.801 | v5.3 vs. v7.1 | OASIS |
| RH_lateralorbitofrontal_thickavg | ICC3 | 0.765 | 7.52    | 19 | 19 | 2.66E-05 | 0.552  | 0.884 | v6.0          | OASIS |
| RH_lateralorbitofrontal_thickavg | ICC2 | 0.687 | 9.15    | 19 | 19 | 5.92E-06 | 0.203  | 0.867 | v6.0 vs. v7.1 | OASIS |
| RH_lateralorbitofrontal_thickavg | ICC3 | 0.585 | 3.82    | 19 | 19 | 2.69E-03 | 0.275  | 0.784 | v7.1          | OASIS |
| RH_LateralVentricle              | ICC3 | 0.998 | 917.23  | 19 | 19 | 3.34E-24 | 0.995  | 0.999 | v5.3          | OASIS |
| RH_LateralVentricle              | ICC2 | 0.994 | 1678.93 | 19 | 19 | 1.08E-26 | 0.781  | 0.998 | v5.3 vs. v6.0 | OASIS |
| RH_LateralVentricle              | ICC2 | 0.993 | 1697.28 | 19 | 19 | 9.73E-27 | 0.740  | 0.998 | v5.3 vs. v7.1 | OASIS |
| RH_LateralVentricle              | ICC3 | 0.999 | 1667.59 | 19 | 19 | 1.15E-26 | 0.997  | 0.999 | v6.0          | OASIS |
| RH_LateralVentricle              | ICC2 | 1.000 | 4859.57 | 19 | 19 | 4.48E-31 | 0.999  | 1.000 | v6.0 vs. v7.1 | OASIS |
| RH_LateralVentricle              | ICC3 | 0.999 | 1735.58 | 19 | 19 | 7.88E-27 | 0.998  | 0.999 | v7.1          | OASIS |
| RH_lingual_surfavg               | ICC3 | 0.983 | 114.34  | 19 | 19 | 1.14E-15 | 0.963  | 0.992 | v5.3          | OASIS |
| RH_lingual_surfavg               | ICC2 | 0.945 | 52.23   | 19 | 19 | 1.64E-12 | 0.823  | 0.978 | v5.3 vs. v6.0 | OASIS |
| RH_lingual_surfavg               | ICC2 | 0.887 | 41.40   | 19 | 19 | 1.37E-11 | 0.341  | 0.963 | v5.3 vs. v7.1 | OASIS |

|                                 |      |       |        |    |    |          |        |       |               |       |
|---------------------------------|------|-------|--------|----|----|----------|--------|-------|---------------|-------|
| RH_lingual_surfavg              | ICC3 | 0.993 | 278.12 | 19 | 19 | 2.68E-19 | 0.985  | 0.997 | v6.0          | OASIS |
| RH_lingual_surfavg              | ICC2 | 0.978 | 295.14 | 19 | 19 | 1.53E-19 | 0.667  | 0.994 | v6.0 vs. v7.1 | OASIS |
| RH_lingual_surfavg              | ICC3 | 0.989 | 182.95 | 19 | 19 | 1.39E-17 | 0.977  | 0.995 | v7.1          | OASIS |
| RH_lingual_thickavg             | ICC3 | 0.899 | 18.72  | 19 | 19 | 1.58E-08 | 0.792  | 0.952 | v5.3          | OASIS |
| RH_lingual_thickavg             | ICC2 | 0.786 | 16.85  | 19 | 19 | 3.91E-08 | 0.245  | 0.920 | v5.3 vs. v6.0 | OASIS |
| RH_lingual_thickavg             | ICC2 | 0.788 | 9.13   | 19 | 19 | 6.01E-06 | 0.591  | 0.896 | v5.3 vs. v7.1 | OASIS |
| RH_lingual_thickavg             | ICC3 | 0.868 | 14.20  | 19 | 19 | 1.67E-07 | 0.735  | 0.937 | v6.0          | OASIS |
| RH_lingual_thickavg             | ICC2 | 0.708 | 21.80  | 19 | 19 | 4.23E-09 | -0.017 | 0.901 | v6.0 vs. v7.1 | OASIS |
| RH_lingual_thickavg             | ICC3 | 0.888 | 16.90  | 19 | 19 | 3.83E-08 | 0.773  | 0.947 | v7.1          | OASIS |
| RH_medialorbitofrontal_surfavg  | ICC3 | 0.807 | 9.35   | 19 | 19 | 4.98E-06 | 0.624  | 0.906 | v5.3          | OASIS |
| RH_medialorbitofrontal_surfavg  | ICC2 | 0.613 | 8.62   | 19 | 19 | 9.38E-06 | 0.037  | 0.839 | v5.3 vs. v6.0 | OASIS |
| RH_medialorbitofrontal_surfavg  | ICC2 | 0.291 | 8.33   | 19 | 19 | 1.22E-05 | -0.045 | 0.630 | v5.3 vs. v7.1 | OASIS |
| RH_medialorbitofrontal_surfavg  | ICC3 | 0.890 | 17.13  | 19 | 19 | 3.40E-08 | 0.775  | 0.948 | v6.0          | OASIS |
| RH_medialorbitofrontal_surfavg  | ICC2 | 0.550 | 18.29  | 19 | 19 | 1.94E-08 | -0.044 | 0.831 | v6.0 vs. v7.1 | OASIS |
| RH_medialorbitofrontal_surfavg  | ICC3 | 0.905 | 19.98  | 19 | 19 | 9.02E-09 | 0.804  | 0.955 | v7.1          | OASIS |
| RH_medialorbitofrontal_thickavg | ICC3 | 0.733 | 6.50   | 19 | 19 | 7.80E-05 | 0.500  | 0.867 | v5.3          | OASIS |
| RH_medialorbitofrontal_thickavg | ICC2 | 0.771 | 9.08   | 19 | 19 | 6.24E-06 | 0.540  | 0.890 | v5.3 vs. v6.0 | OASIS |
| RH_medialorbitofrontal_thickavg | ICC2 | 0.743 | 6.55   | 19 | 19 | 7.39E-05 | 0.514  | 0.873 | v5.3 vs. v7.1 | OASIS |
| RH_medialorbitofrontal_thickavg | ICC3 | 0.801 | 9.03   | 19 | 19 | 6.54E-06 | 0.613  | 0.903 | v6.0          | OASIS |
| RH_medialorbitofrontal_thickavg | ICC2 | 0.872 | 22.07  | 19 | 19 | 3.79E-09 | 0.618  | 0.948 | v6.0 vs. v7.1 | OASIS |
| RH_medialorbitofrontal_thickavg | ICC3 | 0.775 | 7.89   | 19 | 19 | 1.84E-05 | 0.569  | 0.890 | v7.1          | OASIS |
| RH_middletemporal_surfavg       | ICC3 | 0.983 | 118.59 | 19 | 19 | 8.11E-16 | 0.964  | 0.992 | v5.3          | OASIS |
| RH_middletemporal_surfavg       | ICC2 | 0.931 | 90.07  | 19 | 19 | 1.06E-14 | 0.358  | 0.980 | v5.3 vs. v6.0 | OASIS |
| RH_middletemporal_surfavg       | ICC2 | 0.855 | 42.75  | 19 | 19 | 1.02E-11 | 0.129  | 0.955 | v5.3 vs. v7.1 | OASIS |
| RH_middletemporal_surfavg       | ICC3 | 0.990 | 198.19 | 19 | 19 | 6.54E-18 | 0.978  | 0.995 | v6.0          | OASIS |
| RH_middletemporal_surfavg       | ICC2 | 0.971 | 113.77 | 19 | 19 | 1.20E-15 | 0.878  | 0.989 | v6.0 vs. v7.1 | OASIS |
| RH_middletemporal_surfavg       | ICC3 | 0.986 | 137.24 | 19 | 19 | 2.07E-16 | 0.969  | 0.993 | v7.1          | OASIS |
| RH_middletemporal_thickavg      | ICC3 | 0.771 | 7.75   | 19 | 19 | 2.12E-05 | 0.563  | 0.888 | v5.3          | OASIS |
| RH_middletemporal_thickavg      | ICC2 | 0.784 | 8.10   | 19 | 19 | 1.51E-05 | 0.586  | 0.894 | v5.3 vs. v6.0 | OASIS |
| RH_middletemporal_thickavg      | ICC2 | 0.618 | 4.15   | 19 | 19 | 1.62E-03 | 0.323  | 0.804 | v5.3 vs. v7.1 | OASIS |
| RH_middletemporal_thickavg      | ICC3 | 0.868 | 14.10  | 19 | 19 | 1.76E-07 | 0.734  | 0.937 | v6.0          | OASIS |
| RH_middletemporal_thickavg      | ICC2 | 0.764 | 8.11   | 19 | 19 | 1.50E-05 | 0.552  | 0.884 | v6.0 vs. v7.1 | OASIS |
| RH_middletemporal_thickavg      | ICC3 | 0.850 | 12.31  | 19 | 19 | 5.47E-07 | 0.700  | 0.928 | v7.1          | OASIS |
| RH_Pallidum                     | ICC3 | 0.840 | 11.46  | 19 | 19 | 9.76E-07 | 0.682  | 0.923 | v5.3          | OASIS |
| RH_Pallidum                     | ICC2 | 0.874 | 15.21  | 19 | 19 | 9.37E-08 | 0.748  | 0.939 | v5.3 vs. v6.0 | OASIS |
| RH_Pallidum                     | ICC2 | 0.791 | 10.88  | 19 | 19 | 1.49E-06 | 0.540  | 0.903 | v5.3 vs. v7.1 | OASIS |
| RH_Pallidum                     | ICC3 | 0.948 | 37.82  | 19 | 19 | 3.11E-11 | 0.892  | 0.976 | v6.0          | OASIS |
| RH_Pallidum                     | ICC2 | 0.939 | 52.10  | 19 | 19 | 1.67E-12 | 0.766  | 0.977 | v6.0 vs. v7.1 | OASIS |
| RH_Pallidum                     | ICC3 | 0.938 | 31.39  | 19 | 19 | 1.67E-10 | 0.871  | 0.971 | v7.1          | OASIS |
| RH_paracentral_surfavg          | ICC3 | 0.983 | 114.73 | 19 | 19 | 1.11E-15 | 0.963  | 0.992 | v5.3          | OASIS |
| RH_paracentral_surfavg          | ICC2 | 0.942 | 31.81  | 19 | 19 | 1.48E-10 | 0.878  | 0.973 | v5.3 vs. v6.0 | OASIS |
| RH_paracentral_surfavg          | ICC2 | 0.947 | 36.23  | 19 | 19 | 4.58E-11 | 0.889  | 0.975 | v5.3 vs. v7.1 | OASIS |
| RH_paracentral_surfavg          | ICC3 | 0.984 | 127.25 | 19 | 19 | 4.19E-16 | 0.966  | 0.993 | v6.0          | OASIS |
| RH_paracentral_surfavg          | ICC2 | 0.991 | 291.24 | 19 | 19 | 1.74E-19 | 0.977  | 0.996 | v6.0 vs. v7.1 | OASIS |



|                             |      |       |        |    |    |          |        |       |               |       |
|-----------------------------|------|-------|--------|----|----|----------|--------|-------|---------------|-------|
| RH_paracentral_surfavg      | ICC3 | 0.993 | 280.71 | 19 | 19 | 2.46E-19 | 0.985  | 0.997 | v7.1          | OASIS |
| RH_paracentral_thickavg     | ICC3 | 0.884 | 16.24  | 19 | 19 | 5.37E-08 | 0.764  | 0.945 | v5.3          | OASIS |
| RH_paracentral_thickavg     | ICC2 | 0.701 | 21.16  | 19 | 19 | 5.47E-09 | -0.020 | 0.898 | v5.3 vs. v6.0 | OASIS |
| RH_paracentral_thickavg     | ICC2 | 0.723 | 16.61  | 19 | 19 | 4.43E-08 | 0.043  | 0.901 | v5.3 vs. v7.1 | OASIS |
| RH_paracentral_thickavg     | ICC3 | 0.859 | 13.21  | 19 | 19 | 3.05E-07 | 0.718  | 0.933 | v6.0          | OASIS |
| RH_paracentral_thickavg     | ICC2 | 0.946 | 37.69  | 19 | 19 | 3.20E-11 | 0.887  | 0.975 | v6.0 vs. v7.1 | OASIS |
| RH_paracentral_thickavg     | ICC3 | 0.897 | 18.38  | 19 | 19 | 1.86E-08 | 0.789  | 0.951 | v7.1          | OASIS |
| RH_parahippocampal_surfavg  | ICC3 | 0.911 | 21.59  | 19 | 19 | 4.60E-09 | 0.817  | 0.958 | v5.3          | OASIS |
| RH_parahippocampal_surfavg  | ICC2 | 0.703 | 12.25  | 19 | 19 | 5.67E-07 | 0.104  | 0.885 | v5.3 vs. v6.0 | OASIS |
| RH_parahippocampal_surfavg  | ICC2 | 0.538 | 6.77   | 19 | 19 | 5.75E-05 | -0.006 | 0.796 | v5.3 vs. v7.1 | OASIS |
| RH_parahippocampal_surfavg  | ICC3 | 0.914 | 22.23  | 19 | 19 | 3.56E-09 | 0.822  | 0.959 | v6.0          | OASIS |
| RH_parahippocampal_surfavg  | ICC2 | 0.918 | 33.94  | 19 | 19 | 8.26E-11 | 0.751  | 0.967 | v6.0 vs. v7.1 | OASIS |
| RH_parahippocampal_surfavg  | ICC3 | 0.949 | 38.41  | 19 | 19 | 2.70E-11 | 0.893  | 0.976 | v7.1          | OASIS |
| RH_parahippocampal_thickavg | ICC3 | 0.765 | 7.51   | 19 | 19 | 2.68E-05 | 0.552  | 0.884 | v5.3          | OASIS |
| RH_parahippocampal_thickavg | ICC2 | 0.818 | 19.16  | 19 | 19 | 1.30E-08 | 0.336  | 0.932 | v5.3 vs. v6.0 | OASIS |
| RH_parahippocampal_thickavg | ICC2 | 0.798 | 9.17   | 19 | 19 | 5.80E-06 | 0.613  | 0.901 | v5.3 vs. v7.1 | OASIS |
| RH_parahippocampal_thickavg | ICC3 | 0.762 | 7.39   | 19 | 19 | 3.02E-05 | 0.546  | 0.883 | v6.0          | OASIS |
| RH_parahippocampal_thickavg | ICC2 | 0.870 | 24.63  | 19 | 19 | 1.44E-09 | 0.535  | 0.950 | v6.0 vs. v7.1 | OASIS |
| RH_parahippocampal_thickavg | ICC3 | 0.850 | 12.32  | 19 | 19 | 5.42E-07 | 0.701  | 0.928 | v7.1          | OASIS |
| RH_parsopercularis_surfavg  | ICC3 | 0.942 | 33.43  | 19 | 19 | 9.46E-11 | 0.878  | 0.973 | v5.3          | OASIS |
| RH_parsopercularis_surfavg  | ICC2 | 0.906 | 24.26  | 19 | 19 | 1.65E-09 | 0.785  | 0.957 | v5.3 vs. v6.0 | OASIS |
| RH_parsopercularis_surfavg  | ICC2 | 0.914 | 23.64  | 19 | 19 | 2.07E-09 | 0.822  | 0.959 | v5.3 vs. v7.1 | OASIS |
| RH_parsopercularis_surfavg  | ICC3 | 0.968 | 61.00  | 19 | 19 | 3.92E-13 | 0.931  | 0.985 | v6.0          | OASIS |
| RH_parsopercularis_surfavg  | ICC2 | 0.980 | 106.21 | 19 | 19 | 2.27E-15 | 0.956  | 0.991 | v6.0 vs. v7.1 | OASIS |
| RH_parsopercularis_surfavg  | ICC3 | 0.988 | 164.10 | 19 | 19 | 3.86E-17 | 0.974  | 0.994 | v7.1          | OASIS |
| RH_parsopercularis_thickavg | ICC3 | 0.734 | 6.52   | 19 | 19 | 7.64E-05 | 0.501  | 0.868 | v5.3          | OASIS |
| RH_parsopercularis_thickavg | ICC2 | 0.872 | 17.76  | 19 | 19 | 2.50E-08 | 0.715  | 0.942 | v5.3 vs. v6.0 | OASIS |
| RH_parsopercularis_thickavg | ICC2 | 0.827 | 10.61  | 19 | 19 | 1.82E-06 | 0.663  | 0.916 | v5.3 vs. v7.1 | OASIS |
| RH_parsopercularis_thickavg | ICC3 | 0.865 | 13.86  | 19 | 19 | 2.05E-07 | 0.729  | 0.936 | v6.0          | OASIS |
| RH_parsopercularis_thickavg | ICC2 | 0.885 | 16.57  | 19 | 19 | 4.52E-08 | 0.769  | 0.945 | v6.0 vs. v7.1 | OASIS |
| RH_parsopercularis_thickavg | ICC3 | 0.859 | 13.18  | 19 | 19 | 3.11E-07 | 0.717  | 0.932 | v7.1          | OASIS |
| RH_parsorbitalis_surfavg    | ICC3 | 0.924 | 25.26  | 19 | 19 | 1.16E-09 | 0.842  | 0.964 | v5.3          | OASIS |
| RH_parsorbitalis_surfavg    | ICC2 | 0.568 | 10.56  | 19 | 19 | 1.89E-06 | -0.046 | 0.828 | v5.3 vs. v6.0 | OASIS |
| RH_parsorbitalis_surfavg    | ICC2 | 0.488 | 11.89  | 19 | 19 | 7.24E-07 | -0.055 | 0.790 | v5.3 vs. v7.1 | OASIS |
| RH_parsorbitalis_surfavg    | ICC3 | 0.946 | 36.28  | 19 | 19 | 4.53E-11 | 0.887  | 0.975 | v6.0          | OASIS |
| RH_parsorbitalis_surfavg    | ICC2 | 0.948 | 106.50 | 19 | 19 | 2.22E-15 | 0.511  | 0.984 | v6.0 vs. v7.1 | OASIS |
| RH_parsorbitalis_surfavg    | ICC3 | 0.973 | 73.90  | 19 | 19 | 6.65E-14 | 0.943  | 0.988 | v7.1          | OASIS |
| RH_parsorbitalis_thickavg   | ICC3 | 0.721 | 6.18   | 19 | 19 | 1.12E-04 | 0.481  | 0.861 | v5.3          | OASIS |
| RH_parsorbitalis_thickavg   | ICC2 | 0.842 | 11.31  | 19 | 19 | 1.09E-06 | 0.688  | 0.924 | v5.3 vs. v6.0 | OASIS |
| RH_parsorbitalis_thickavg   | ICC2 | 0.847 | 12.08  | 19 | 19 | 6.34E-07 | 0.700  | 0.926 | v5.3 vs. v7.1 | OASIS |
| RH_parsorbitalis_thickavg   | ICC3 | 0.816 | 9.88   | 19 | 19 | 3.22E-06 | 0.640  | 0.911 | v6.0          | OASIS |
| RH_parsorbitalis_thickavg   | ICC2 | 0.923 | 24.40  | 19 | 19 | 1.57E-09 | 0.842  | 0.964 | v6.0 vs. v7.1 | OASIS |
| RH_parsorbitalis_thickavg   | ICC3 | 0.800 | 9.02   | 19 | 19 | 6.61E-06 | 0.612  | 0.903 | v7.1          | OASIS |
| RH_parstriangularis_surfavg | ICC3 | 0.967 | 59.95  | 19 | 19 | 4.61E-13 | 0.930  | 0.985 | v5.3          | OASIS |

|                                |      |       |        |    |    |          |        |       |               |       |
|--------------------------------|------|-------|--------|----|----|----------|--------|-------|---------------|-------|
| RH_parstriangularis_surfavg    | ICC2 | 0.839 | 14.42  | 19 | 19 | 1.47E-07 | 0.636  | 0.927 | v5.3 vs. v6.0 | OASIS |
| RH_parstriangularis_surfavg    | ICC2 | 0.819 | 14.19  | 19 | 19 | 1.67E-07 | 0.539  | 0.922 | v5.3 vs. v7.1 | OASIS |
| RH_parstriangularis_surfavg    | ICC3 | 0.982 | 112.78 | 19 | 19 | 1.30E-15 | 0.962  | 0.992 | v6.0          | OASIS |
| RH_parstriangularis_surfavg    | ICC2 | 0.982 | 126.69 | 19 | 19 | 4.37E-16 | 0.960  | 0.992 | v6.0 vs. v7.1 | OASIS |
| RH_parstriangularis_surfavg    | ICC3 | 0.989 | 188.77 | 19 | 19 | 1.03E-17 | 0.977  | 0.995 | v7.1          | OASIS |
| RH_parstriangularis_thickavg   | ICC3 | 0.698 | 5.63   | 19 | 19 | 2.16E-04 | 0.444  | 0.849 | v5.3          | OASIS |
| RH_parstriangularis_thickavg   | ICC2 | 0.821 | 13.81  | 19 | 19 | 2.10E-07 | 0.563  | 0.921 | v5.3 vs. v6.0 | OASIS |
| RH_parstriangularis_thickavg   | ICC2 | 0.743 | 7.54   | 19 | 19 | 2.59E-05 | 0.513  | 0.873 | v5.3 vs. v7.1 | OASIS |
| RH_parstriangularis_thickavg   | ICC3 | 0.902 | 19.45  | 19 | 19 | 1.14E-08 | 0.799  | 0.954 | v6.0          | OASIS |
| RH_parstriangularis_thickavg   | ICC2 | 0.884 | 15.77  | 19 | 19 | 6.89E-08 | 0.766  | 0.945 | v6.0 vs. v7.1 | OASIS |
| RH_parstriangularis_thickavg   | ICC3 | 0.802 | 9.11   | 19 | 19 | 6.09E-06 | 0.616  | 0.904 | v7.1          | OASIS |
| RH_pericalcarine_surfavg       | ICC3 | 0.885 | 16.45  | 19 | 19 | 4.82E-08 | 0.767  | 0.945 | v5.3          | OASIS |
| RH_pericalcarine_surfavg       | ICC2 | 0.943 | 64.04  | 19 | 19 | 2.50E-13 | 0.713  | 0.980 | v5.3 vs. v6.0 | OASIS |
| RH_pericalcarine_surfavg       | ICC2 | 0.917 | 60.21  | 19 | 19 | 4.43E-13 | 0.416  | 0.974 | v5.3 vs. v7.1 | OASIS |
| RH_pericalcarine_surfavg       | ICC3 | 0.993 | 303.47 | 19 | 19 | 1.18E-19 | 0.986  | 0.997 | v6.0          | OASIS |
| RH_pericalcarine_surfavg       | ICC2 | 0.989 | 254.13 | 19 | 19 | 6.28E-19 | 0.964  | 0.996 | v6.0 vs. v7.1 | OASIS |
| RH_pericalcarine_surfavg       | ICC3 | 0.989 | 177.91 | 19 | 19 | 1.81E-17 | 0.976  | 0.995 | v7.1          | OASIS |
| RH_pericalcarine_thickavg      | ICC3 | 0.879 | 15.47  | 19 | 19 | 8.11E-08 | 0.754  | 0.942 | v5.3          | OASIS |
| RH_pericalcarine_thickavg      | ICC2 | 0.766 | 14.12  | 19 | 19 | 1.75E-07 | 0.258  | 0.909 | v5.3 vs. v6.0 | OASIS |
| RH_pericalcarine_thickavg      | ICC2 | 0.826 | 11.13  | 19 | 19 | 1.24E-06 | 0.660  | 0.916 | v5.3 vs. v7.1 | OASIS |
| RH_pericalcarine_thickavg      | ICC3 | 0.734 | 6.53   | 19 | 19 | 7.53E-05 | 0.501  | 0.868 | v6.0          | OASIS |
| RH_pericalcarine_thickavg      | ICC2 | 0.868 | 20.21  | 19 | 19 | 8.18E-09 | 0.634  | 0.944 | v6.0 vs. v7.1 | OASIS |
| RH_pericalcarine_thickavg      | ICC3 | 0.907 | 20.40  | 19 | 19 | 7.54E-09 | 0.808  | 0.956 | v7.1          | OASIS |
| RH_postcentral_surfavg         | ICC3 | 0.990 | 208.57 | 19 | 19 | 4.04E-18 | 0.979  | 0.996 | v5.3          | OASIS |
| RH_postcentral_surfavg         | ICC2 | 0.919 | 23.16  | 19 | 19 | 2.49E-09 | 0.834  | 0.962 | v5.3 vs. v6.0 | OASIS |
| RH_postcentral_surfavg         | ICC2 | 0.917 | 22.43  | 19 | 19 | 3.29E-09 | 0.830  | 0.961 | v5.3 vs. v7.1 | OASIS |
| RH_postcentral_surfavg         | ICC3 | 0.990 | 206.99 | 19 | 19 | 4.34E-18 | 0.979  | 0.996 | v6.0          | OASIS |
| RH_postcentral_surfavg         | ICC2 | 0.990 | 485.23 | 19 | 19 | 1.39E-21 | 0.886  | 0.997 | v6.0 vs. v7.1 | OASIS |
| RH_postcentral_surfavg         | ICC3 | 0.991 | 229.71 | 19 | 19 | 1.63E-18 | 0.981  | 0.996 | v7.1          | OASIS |
| RH_postcentral_thickavg        | ICC3 | 0.925 | 25.81  | 19 | 19 | 9.56E-10 | 0.845  | 0.965 | v5.3          | OASIS |
| RH_postcentral_thickavg        | ICC2 | 0.803 | 20.17  | 19 | 19 | 8.33E-09 | 0.226  | 0.930 | v5.3 vs. v6.0 | OASIS |
| RH_postcentral_thickavg        | ICC2 | 0.839 | 26.39  | 19 | 19 | 7.83E-10 | 0.265  | 0.944 | v5.3 vs. v7.1 | OASIS |
| RH_postcentral_thickavg        | ICC3 | 0.958 | 46.53  | 19 | 19 | 4.71E-12 | 0.911  | 0.980 | v6.0          | OASIS |
| RH_postcentral_thickavg        | ICC2 | 0.981 | 104.79 | 19 | 19 | 2.58E-15 | 0.960  | 0.991 | v6.0 vs. v7.1 | OASIS |
| RH_postcentral_thickavg        | ICC3 | 0.984 | 120.91 | 19 | 19 | 6.77E-16 | 0.965  | 0.992 | v7.1          | OASIS |
| RH_posteriorcingulate_surfavg  | ICC3 | 0.972 | 69.60  | 19 | 19 | 1.16E-13 | 0.940  | 0.987 | v5.3          | OASIS |
| RH_posteriorcingulate_surfavg  | ICC2 | 0.963 | 50.24  | 19 | 19 | 2.34E-12 | 0.921  | 0.983 | v5.3 vs. v6.0 | OASIS |
| RH_posteriorcingulate_surfavg  | ICC2 | 0.942 | 45.36  | 19 | 19 | 5.95E-12 | 0.839  | 0.976 | v5.3 vs. v7.1 | OASIS |
| RH_posteriorcingulate_surfavg  | ICC3 | 0.981 | 101.89 | 19 | 19 | 3.35E-15 | 0.958  | 0.991 | v6.0          | OASIS |
| RH_posteriorcingulate_surfavg  | ICC2 | 0.974 | 158.29 | 19 | 19 | 5.41E-17 | 0.817  | 0.991 | v6.0 vs. v7.1 | OASIS |
| RH_posteriorcingulate_surfavg  | ICC3 | 0.972 | 69.58  | 19 | 19 | 1.16E-13 | 0.940  | 0.987 | v7.1          | OASIS |
| RH_posteriorcingulate_thickavg | ICC3 | 0.877 | 15.31  | 19 | 19 | 8.87E-08 | 0.752  | 0.941 | v5.3          | OASIS |
| RH_posteriorcingulate_thickavg | ICC2 | 0.904 | 32.65  | 19 | 19 | 1.17E-10 | 0.649  | 0.963 | v5.3 vs. v6.0 | OASIS |
| RH_posteriorcingulate_thickavg | ICC2 | 0.579 | 13.79  | 19 | 19 | 2.13E-07 | -0.050 | 0.841 | v5.3 vs. v7.1 | OASIS |

|                                      |      |       |        |    |    |          |        |       |               |       |
|--------------------------------------|------|-------|--------|----|----|----------|--------|-------|---------------|-------|
| RH_posteriorcingulate_thickavg       | ICC3 | 0.877 | 15.26  | 19 | 19 | 9.11E-08 | 0.751  | 0.941 | v6.0          | OASIS |
| RH_posteriorcingulate_thickavg       | ICC2 | 0.730 | 25.48  | 19 | 19 | 1.07E-09 | -0.013 | 0.911 | v6.0 vs. v7.1 | OASIS |
| RH_posteriorcingulate_thickavg       | ICC3 | 0.915 | 22.66  | 19 | 19 | 3.01E-09 | 0.825  | 0.960 | v7.1          | OASIS |
| RH_precentral_surfvag                | ICC3 | 0.982 | 109.77 | 19 | 19 | 1.67E-15 | 0.961  | 0.992 | v5.3          | OASIS |
| RH_precentral_surfvag                | ICC2 | 0.804 | 9.41   | 19 | 19 | 4.72E-06 | 0.623  | 0.904 | v5.3 vs. v6.0 | OASIS |
| RH_precentral_surfvag                | ICC2 | 0.780 | 7.96   | 19 | 19 | 1.73E-05 | 0.580  | 0.892 | v5.3 vs. v7.1 | OASIS |
| RH_precentral_surfvag                | ICC3 | 0.993 | 284.18 | 19 | 19 | 2.19E-19 | 0.985  | 0.997 | v6.0          | OASIS |
| RH_precentral_surfvag                | ICC2 | 0.985 | 140.73 | 19 | 19 | 1.63E-16 | 0.969  | 0.993 | v6.0 vs. v7.1 | OASIS |
| RH_precentral_surfvag                | ICC3 | 0.989 | 176.62 | 19 | 19 | 1.93E-17 | 0.976  | 0.995 | v7.1          | OASIS |
| RH_precentral_thickavg               | ICC3 | 0.955 | 43.73  | 19 | 19 | 8.30E-12 | 0.906  | 0.979 | v5.3          | OASIS |
| RH_precentral_thickavg               | ICC2 | 0.724 | 15.85  | 19 | 19 | 6.61E-08 | 0.061  | 0.900 | v5.3 vs. v6.0 | OASIS |
| RH_precentral_thickavg               | ICC2 | 0.714 | 12.19  | 19 | 19 | 5.89E-07 | 0.137  | 0.888 | v5.3 vs. v7.1 | OASIS |
| RH_precentral_thickavg               | ICC3 | 0.948 | 37.47  | 19 | 19 | 3.38E-11 | 0.891  | 0.976 | v6.0          | OASIS |
| RH_precentral_thickavg               | ICC2 | 0.961 | 48.92  | 19 | 19 | 2.98E-12 | 0.918  | 0.982 | v6.0 vs. v7.1 | OASIS |
| RH_precentral_thickavg               | ICC3 | 0.968 | 62.39  | 19 | 19 | 3.19E-13 | 0.933  | 0.985 | v7.1          | OASIS |
| RH_precuneus_surfvag                 | ICC3 | 0.810 | 9.54   | 19 | 19 | 4.24E-06 | 0.630  | 0.908 | v5.3          | OASIS |
| RH_precuneus_surfvag                 | ICC2 | 0.973 | 69.40  | 19 | 19 | 1.19E-13 | 0.942  | 0.987 | v5.3 vs. v6.0 | OASIS |
| RH_precuneus_surfvag                 | ICC2 | 0.963 | 50.02  | 19 | 19 | 2.43E-12 | 0.921  | 0.983 | v5.3 vs. v7.1 | OASIS |
| RH_precuneus_surfvag                 | ICC3 | 0.989 | 183.51 | 19 | 19 | 1.35E-17 | 0.977  | 0.995 | v6.0          | OASIS |
| RH_precuneus_surfvag                 | ICC2 | 0.996 | 532.77 | 19 | 19 | 5.74E-22 | 0.992  | 0.998 | v6.0 vs. v7.1 | OASIS |
| RH_precuneus_surfvag                 | ICC3 | 0.988 | 169.47 | 19 | 19 | 2.85E-17 | 0.975  | 0.995 | v7.1          | OASIS |
| RH_precuneus_thickavg                | ICC3 | 0.874 | 14.83  | 19 | 19 | 1.16E-07 | 0.745  | 0.940 | v5.3          | OASIS |
| RH_precuneus_thickavg                | ICC2 | 0.916 | 24.63  | 19 | 19 | 1.44E-09 | 0.824  | 0.960 | v5.3 vs. v6.0 | OASIS |
| RH_precuneus_thickavg                | ICC2 | 0.859 | 12.57  | 19 | 19 | 4.59E-07 | 0.716  | 0.932 | v5.3 vs. v7.1 | OASIS |
| RH_precuneus_thickavg                | ICC3 | 0.934 | 29.35  | 19 | 19 | 3.04E-10 | 0.862  | 0.969 | v6.0          | OASIS |
| RH_precuneus_thickavg                | ICC2 | 0.925 | 31.56  | 19 | 19 | 1.59E-10 | 0.824  | 0.967 | v6.0 vs. v7.1 | OASIS |
| RH_precuneus_thickavg                | ICC3 | 0.907 | 20.43  | 19 | 19 | 7.45E-09 | 0.808  | 0.956 | v7.1          | OASIS |
| RH_Putamen                           | ICC3 | 0.973 | 73.78  | 19 | 19 | 6.75E-14 | 0.943  | 0.988 | v5.3          | OASIS |
| RH_Putamen                           | ICC2 | 0.406 | 51.25  | 19 | 19 | 1.95E-12 | -0.009 | 0.747 | v5.3 vs. v6.0 | OASIS |
| RH_Putamen                           | ICC2 | 0.428 | 51.29  | 19 | 19 | 1.93E-12 | -0.010 | 0.764 | v5.3 vs. v7.1 | OASIS |
| RH_Putamen                           | ICC3 | 0.981 | 105.61 | 19 | 19 | 2.40E-15 | 0.960  | 0.991 | v6.0          | OASIS |
| RH_Putamen                           | ICC2 | 0.987 | 212.51 | 19 | 19 | 3.39E-18 | 0.963  | 0.995 | v6.0 vs. v7.1 | OASIS |
| RH_Putamen                           | ICC3 | 0.978 | 89.57  | 19 | 19 | 1.11E-14 | 0.953  | 0.990 | v7.1          | OASIS |
| RH_rostralanteriorcingulate_surfvag  | ICC3 | 0.895 | 18.11  | 19 | 19 | 2.11E-08 | 0.786  | 0.950 | v5.3          | OASIS |
| RH_rostralanteriorcingulate_surfvag  | ICC2 | 0.785 | 19.15  | 19 | 19 | 1.30E-08 | 0.171  | 0.923 | v5.3 vs. v6.0 | OASIS |
| RH_rostralanteriorcingulate_surfvag  | ICC2 | 0.825 | 11.89  | 19 | 19 | 7.27E-07 | 0.645  | 0.917 | v5.3 vs. v7.1 | OASIS |
| RH_rostralanteriorcingulate_surfvag  | ICC3 | 0.928 | 26.91  | 19 | 19 | 6.60E-10 | 0.851  | 0.966 | v6.0          | OASIS |
| RH_rostralanteriorcingulate_surfvag  | ICC2 | 0.922 | 50.08  | 19 | 19 | 2.41E-12 | 0.592  | 0.973 | v6.0 vs. v7.1 | OASIS |
| RH_rostralanteriorcingulate_surfvag  | ICC3 | 0.892 | 17.48  | 19 | 19 | 2.86E-08 | 0.779  | 0.949 | v7.1          | OASIS |
| RH_rostralanteriorcingulate_thickavg | ICC3 | 0.542 | 3.36   | 19 | 19 | 5.60E-03 | 0.216  | 0.759 | v5.3          | OASIS |
| RH_rostralanteriorcingulate_thickavg | ICC2 | 0.530 | 4.32   | 19 | 19 | 1.25E-03 | 0.154  | 0.760 | v5.3 vs. v6.0 | OASIS |
| RH_rostralanteriorcingulate_thickavg | ICC2 | 0.420 | 2.44   | 19 | 19 | 2.93E-02 | 0.066  | 0.682 | v5.3 vs. v7.1 | OASIS |
| RH_rostralanteriorcingulate_thickavg | ICC3 | 0.335 | 2.01   | 19 | 19 | 6.90E-02 | -0.039 | 0.626 | v6.0          | OASIS |
| RH_rostralanteriorcingulate_thickavg | ICC2 | 0.493 | 6.99   | 19 | 19 | 4.57E-05 | -0.050 | 0.776 | v6.0 vs. v7.1 | OASIS |

|                                      |      |       |        |    |    |          |       |       |               |       |
|--------------------------------------|------|-------|--------|----|----|----------|-------|-------|---------------|-------|
| RH_rostralanteriorcingulate_thickavg | ICC3 | 0.471 | 2.78   | 19 | 19 | 1.57E-02 | 0.123 | 0.715 | v7.1          | OASIS |
| RH_rostralmiddlefrontal_surfav       | ICC3 | 0.966 | 58.31  | 19 | 19 | 5.95E-13 | 0.928 | 0.984 | v5.3          | OASIS |
| RH_rostralmiddlefrontal_surfav       | ICC2 | 0.928 | 28.24  | 19 | 19 | 4.29E-10 | 0.850 | 0.966 | v5.3 vs. v6.0 | OASIS |
| RH_rostralmiddlefrontal_surfav       | ICC2 | 0.833 | 18.19  | 19 | 19 | 2.04E-08 | 0.465 | 0.934 | v5.3 vs. v7.1 | OASIS |
| RH_rostralmiddlefrontal_surfav       | ICC3 | 0.987 | 149.52 | 19 | 19 | 9.25E-17 | 0.971 | 0.994 | v6.0          | OASIS |
| RH_rostralmiddlefrontal_surfav       | ICC2 | 0.939 | 77.39  | 19 | 19 | 4.34E-14 | 0.561 | 0.981 | v6.0 vs. v7.1 | OASIS |
| RH_rostralmiddlefrontal_surfav       | ICC3 | 0.983 | 115.24 | 19 | 19 | 1.06E-15 | 0.963 | 0.992 | v7.1          | OASIS |
| RH_rostralmiddlefrontal_thickavg     | ICC3 | 0.840 | 11.54  | 19 | 19 | 9.25E-07 | 0.684 | 0.923 | v5.3          | OASIS |
| RH_rostralmiddlefrontal_thickavg     | ICC2 | 0.845 | 12.23  | 19 | 19 | 5.77E-07 | 0.695 | 0.925 | v5.3 vs. v6.0 | OASIS |
| RH_rostralmiddlefrontal_thickavg     | ICC2 | 0.674 | 5.21   | 19 | 19 | 3.65E-04 | 0.413 | 0.834 | v5.3 vs. v7.1 | OASIS |
| RH_rostralmiddlefrontal_thickavg     | ICC3 | 0.866 | 13.94  | 19 | 19 | 1.95E-07 | 0.731 | 0.936 | v6.0          | OASIS |
| RH_rostralmiddlefrontal_thickavg     | ICC2 | 0.898 | 18.01  | 19 | 19 | 2.21E-08 | 0.793 | 0.952 | v6.0 vs. v7.1 | OASIS |
| RH_rostralmiddlefrontal_thickavg     | ICC3 | 0.909 | 21.07  | 19 | 19 | 5.70E-09 | 0.813 | 0.957 | v7.1          | OASIS |
| RH_superiorfrontal_surfav            | ICC3 | 0.989 | 183.45 | 19 | 19 | 1.35E-17 | 0.977 | 0.995 | v5.3          | OASIS |
| RH_superiorfrontal_surfav            | ICC2 | 0.948 | 72.58  | 19 | 19 | 7.86E-14 | 0.721 | 0.982 | v5.3 vs. v6.0 | OASIS |
| RH_superiorfrontal_surfav            | ICC2 | 0.909 | 55.68  | 19 | 19 | 9.09E-13 | 0.379 | 0.971 | v5.3 vs. v7.1 | OASIS |
| RH_superiorfrontal_surfav            | ICC3 | 0.990 | 198.14 | 19 | 19 | 6.56E-18 | 0.978 | 0.995 | v6.0          | OASIS |
| RH_superiorfrontal_surfav            | ICC2 | 0.985 | 237.08 | 19 | 19 | 1.21E-18 | 0.916 | 0.995 | v6.0 vs. v7.1 | OASIS |
| RH_superiorfrontal_surfav            | ICC3 | 0.993 | 270.71 | 19 | 19 | 3.46E-19 | 0.984 | 0.997 | v7.1          | OASIS |
| RH_superiorfrontal_thickavg          | ICC3 | 0.840 | 11.48  | 19 | 19 | 9.66E-07 | 0.682 | 0.923 | v5.3          | OASIS |
| RH_superiorfrontal_thickavg          | ICC2 | 0.867 | 13.48  | 19 | 19 | 2.57E-07 | 0.732 | 0.936 | v5.3 vs. v6.0 | OASIS |
| RH_superiorfrontal_thickavg          | ICC2 | 0.846 | 12.07  | 19 | 19 | 6.43E-07 | 0.698 | 0.925 | v5.3 vs. v7.1 | OASIS |
| RH_superiorfrontal_thickavg          | ICC3 | 0.903 | 19.72  | 19 | 19 | 1.01E-08 | 0.802 | 0.954 | v6.0          | OASIS |
| RH_superiorfrontal_thickavg          | ICC2 | 0.926 | 26.17  | 19 | 19 | 8.46E-10 | 0.848 | 0.965 | v6.0 vs. v7.1 | OASIS |
| RH_superiorfrontal_thickavg          | ICC3 | 0.889 | 16.94  | 19 | 19 | 3.74E-08 | 0.773 | 0.947 | v7.1          | OASIS |
| RH_superiorparietal_surfav           | ICC3 | 0.978 | 88.13  | 19 | 19 | 1.30E-14 | 0.952 | 0.990 | v5.3          | OASIS |
| RH_superiorparietal_surfav           | ICC2 | 0.908 | 20.00  | 19 | 19 | 8.97E-09 | 0.812 | 0.957 | v5.3 vs. v6.0 | OASIS |
| RH_superiorparietal_surfav           | ICC2 | 0.905 | 19.49  | 19 | 19 | 1.12E-08 | 0.806 | 0.955 | v5.3 vs. v7.1 | OASIS |
| RH_superiorparietal_surfav           | ICC3 | 0.993 | 297.12 | 19 | 19 | 1.44E-19 | 0.986 | 0.997 | v6.0          | OASIS |
| RH_superiorparietal_surfav           | ICC2 | 0.990 | 376.50 | 19 | 19 | 1.53E-20 | 0.932 | 0.996 | v6.0 vs. v7.1 | OASIS |
| RH_superiorparietal_surfav           | ICC3 | 0.992 | 256.19 | 19 | 19 | 5.82E-19 | 0.983 | 0.996 | v7.1          | OASIS |
| RH_superiorparietal_thickavg         | ICC3 | 0.867 | 14.06  | 19 | 19 | 1.81E-07 | 0.733 | 0.936 | v5.3          | OASIS |
| RH_superiorparietal_thickavg         | ICC2 | 0.842 | 22.03  | 19 | 19 | 3.86E-09 | 0.399 | 0.941 | v5.3 vs. v6.0 | OASIS |
| RH_superiorparietal_thickavg         | ICC2 | 0.825 | 17.64  | 19 | 19 | 2.65E-08 | 0.435 | 0.931 | v5.3 vs. v7.1 | OASIS |
| RH_superiorparietal_thickavg         | ICC3 | 0.927 | 26.52  | 19 | 19 | 7.51E-10 | 0.849 | 0.966 | v6.0          | OASIS |
| RH_superiorparietal_thickavg         | ICC2 | 0.936 | 28.73  | 19 | 19 | 3.68E-10 | 0.866 | 0.970 | v6.0 vs. v7.1 | OASIS |
| RH_superiorparietal_thickavg         | ICC3 | 0.936 | 30.12  | 19 | 19 | 2.41E-10 | 0.866 | 0.970 | v7.1          | OASIS |
| RH_superiortemporal_surfav           | ICC3 | 0.976 | 82.20  | 19 | 19 | 2.48E-14 | 0.949 | 0.989 | v5.3          | OASIS |
| RH_superiortemporal_surfav           | ICC2 | 0.933 | 60.31  | 19 | 19 | 4.35E-13 | 0.621 | 0.977 | v5.3 vs. v6.0 | OASIS |
| RH_superiortemporal_surfav           | ICC2 | 0.887 | 43.85  | 19 | 19 | 8.10E-12 | 0.310 | 0.964 | v5.3 vs. v7.1 | OASIS |
| RH_superiortemporal_surfav           | ICC3 | 0.993 | 277.31 | 19 | 19 | 2.76E-19 | 0.984 | 0.997 | v6.0          | OASIS |
| RH_superiortemporal_surfav           | ICC2 | 0.984 | 229.05 | 19 | 19 | 1.67E-18 | 0.905 | 0.994 | v6.0 vs. v7.1 | OASIS |
| RH_superiortemporal_surfav           | ICC3 | 0.992 | 236.82 | 19 | 19 | 1.22E-18 | 0.982 | 0.996 | v7.1          | OASIS |
| RH_superiortemporal_thickavg         | ICC3 | 0.894 | 17.85  | 19 | 19 | 2.39E-08 | 0.783 | 0.950 | v5.3          | OASIS |

|                              |      |       |        |    |    |          |        |       |               |       |
|------------------------------|------|-------|--------|----|----|----------|--------|-------|---------------|-------|
| RH_superiortemporal_thickavg | ICC2 | 0.852 | 18.64  | 19 | 19 | 1.65E-08 | 0.578  | 0.939 | v5.3 vs. v6.0 | OASIS |
| RH_superiortemporal_thickavg | ICC2 | 0.831 | 13.69  | 19 | 19 | 2.26E-07 | 0.616  | 0.923 | v5.3 vs. v7.1 | OASIS |
| RH_superiortemporal_thickavg | ICC3 | 0.960 | 48.60  | 19 | 19 | 3.17E-12 | 0.915  | 0.981 | v6.0          | OASIS |
| RH_superiortemporal_thickavg | ICC2 | 0.894 | 17.11  | 19 | 19 | 3.43E-08 | 0.783  | 0.950 | v6.0 vs. v7.1 | OASIS |
| RH_superiortemporal_thickavg | ICC3 | 0.894 | 17.95  | 19 | 19 | 2.28E-08 | 0.784  | 0.950 | v7.1          | OASIS |
| RH_supramarginal_surfavg     | ICC3 | 0.983 | 117.66 | 19 | 19 | 8.73E-16 | 0.964  | 0.992 | v5.3          | OASIS |
| RH_supramarginal_surfavg     | ICC2 | 0.903 | 20.38  | 19 | 19 | 7.59E-09 | 0.802  | 0.954 | v5.3 vs. v6.0 | OASIS |
| RH_supramarginal_surfavg     | ICC2 | 0.895 | 17.22  | 19 | 19 | 3.25E-08 | 0.785  | 0.950 | v5.3 vs. v7.1 | OASIS |
| RH_supramarginal_surfavg     | ICC3 | 0.993 | 292.35 | 19 | 19 | 1.67E-19 | 0.985  | 0.997 | v6.0          | OASIS |
| RH_supramarginal_surfavg     | ICC2 | 0.988 | 510.77 | 19 | 19 | 8.56E-22 | 0.797  | 0.996 | v6.0 vs. v7.1 | OASIS |
| RH_supramarginal_surfavg     | ICC3 | 0.991 | 228.65 | 19 | 19 | 1.70E-18 | 0.981  | 0.996 | v7.1          | OASIS |
| RH_supramarginal_thickavg    | ICC3 | 0.914 | 22.27  | 19 | 19 | 3.51E-09 | 0.823  | 0.959 | v5.3          | OASIS |
| RH_supramarginal_thickavg    | ICC2 | 0.843 | 12.23  | 19 | 19 | 5.76E-07 | 0.691  | 0.924 | v5.3 vs. v6.0 | OASIS |
| RH_supramarginal_thickavg    | ICC2 | 0.841 | 11.06  | 19 | 19 | 1.31E-06 | 0.683  | 0.923 | v5.3 vs. v7.1 | OASIS |
| RH_supramarginal_thickavg    | ICC3 | 0.924 | 25.27  | 19 | 19 | 1.15E-09 | 0.842  | 0.964 | v6.0          | OASIS |
| RH_supramarginal_thickavg    | ICC2 | 0.903 | 21.44  | 19 | 19 | 4.88E-09 | 0.797  | 0.954 | v6.0 vs. v7.1 | OASIS |
| RH_supramarginal_thickavg    | ICC3 | 0.909 | 20.93  | 19 | 19 | 6.02E-09 | 0.812  | 0.957 | v7.1          | OASIS |
| RH_SurfArea                  | ICC3 | 0.993 | 302.46 | 19 | 19 | 1.21E-19 | 0.986  | 0.997 | v5.3          | OASIS |
| RH_SurfArea                  | ICC2 | 0.981 | 387.13 | 19 | 19 | 1.18E-20 | 0.642  | 0.995 | v5.3 vs. v6.0 | OASIS |
| RH_SurfArea                  | ICC2 | 0.920 | 324.56 | 19 | 19 | 6.24E-20 | 0.056  | 0.980 | v5.3 vs. v7.1 | OASIS |
| RH_SurfArea                  | ICC3 | 0.995 | 393.90 | 19 | 19 | 1.00E-20 | 0.989  | 0.998 | v6.0          | OASIS |
| RH_SurfArea                  | ICC2 | 0.972 | 814.17 | 19 | 19 | 1.03E-23 | 0.211  | 0.993 | v6.0 vs. v7.1 | OASIS |
| RH_SurfArea                  | ICC3 | 0.995 | 413.63 | 19 | 19 | 6.30E-21 | 0.990  | 0.998 | v7.1          | OASIS |
| RH_temporalpole_surfavg      | ICC3 | 0.701 | 5.68   | 19 | 19 | 2.01E-04 | 0.448  | 0.850 | v5.3          | OASIS |
| RH_temporalpole_surfavg      | ICC2 | 0.603 | 10.32  | 19 | 19 | 2.27E-06 | -0.020 | 0.843 | v5.3 vs. v6.0 | OASIS |
| RH_temporalpole_surfavg      | ICC2 | 0.316 | 4.68   | 19 | 19 | 7.45E-04 | -0.073 | 0.638 | v5.3 vs. v7.1 | OASIS |
| RH_temporalpole_surfavg      | ICC3 | 0.793 | 8.65   | 19 | 19 | 9.11E-06 | 0.599  | 0.899 | v6.0          | OASIS |
| RH_temporalpole_surfavg      | ICC2 | 0.716 | 9.34   | 19 | 19 | 5.02E-06 | 0.304  | 0.877 | v6.0 vs. v7.1 | OASIS |
| RH_temporalpole_surfavg      | ICC3 | 0.879 | 15.59  | 19 | 19 | 7.61E-08 | 0.756  | 0.943 | v7.1          | OASIS |
| RH_temporalpole_thickavg     | ICC3 | 0.294 | 1.83   | 19 | 19 | 9.75E-02 | -0.083 | 0.598 | v5.3          | OASIS |
| RH_temporalpole_thickavg     | ICC2 | 0.856 | 12.53  | 19 | 19 | 4.72E-07 | 0.713  | 0.931 | v5.3 vs. v6.0 | OASIS |
| RH_temporalpole_thickavg     | ICC2 | 0.723 | 7.11   | 19 | 19 | 4.05E-05 | 0.472  | 0.863 | v5.3 vs. v7.1 | OASIS |
| RH_temporalpole_thickavg     | ICC3 | 0.650 | 4.72   | 19 | 19 | 7.10E-04 | 0.370  | 0.822 | v6.0          | OASIS |
| RH_temporalpole_thickavg     | ICC2 | 0.843 | 14.99  | 19 | 19 | 1.05E-07 | 0.638  | 0.929 | v6.0 vs. v7.1 | OASIS |
| RH_temporalpole_thickavg     | ICC3 | 0.489 | 2.91   | 19 | 19 | 1.22E-02 | 0.147  | 0.727 | v7.1          | OASIS |
| RH_Thalamus                  | ICC3 | 0.951 | 40.18  | 19 | 19 | 1.79E-11 | 0.898  | 0.977 | v5.3          | OASIS |
| RH_Thalamus                  | ICC2 | 0.944 | 39.41  | 19 | 19 | 2.14E-11 | 0.876  | 0.974 | v5.3 vs. v6.0 | OASIS |
| RH_Thalamus                  | ICC2 | 0.936 | 29.60  | 19 | 19 | 2.82E-10 | 0.867  | 0.970 | v5.3 vs. v7.1 | OASIS |
| RH_Thalamus                  | ICC3 | 0.971 | 67.24  | 19 | 19 | 1.59E-13 | 0.938  | 0.986 | v6.0          | OASIS |
| RH_Thalamus                  | ICC2 | 0.959 | 48.92  | 19 | 19 | 2.98E-12 | 0.914  | 0.981 | v6.0 vs. v7.1 | OASIS |
| RH_Thalamus                  | ICC3 | 0.926 | 26.12  | 19 | 19 | 8.60E-10 | 0.847  | 0.965 | v7.1          | OASIS |
| RH_Thickness                 | ICC3 | 0.846 | 11.95  | 19 | 19 | 6.95E-07 | 0.693  | 0.926 | v5.3          | OASIS |
| RH_Thickness                 | ICC2 | 0.801 | 15.93  | 19 | 19 | 6.31E-08 | 0.360  | 0.922 | v5.3 vs. v6.0 | OASIS |
| RH_Thickness                 | ICC2 | 0.813 | 10.13  | 19 | 19 | 2.65E-06 | 0.638  | 0.909 | v5.3 vs. v7.1 | OASIS |

|                                     |      |       |        |    |    |          |        |       |               |       |
|-------------------------------------|------|-------|--------|----|----|----------|--------|-------|---------------|-------|
| RH_Thickness                        | ICC3 | 0.941 | 32.73  | 19 | 19 | 1.15E-10 | 0.876  | 0.972 | v6.0          | OASIS |
| RH_Thickness                        | ICC2 | 0.867 | 19.41  | 19 | 19 | 1.16E-08 | 0.649  | 0.943 | v6.0 vs. v7.1 | OASIS |
| RH_Thickness                        | ICC3 | 0.927 | 26.48  | 19 | 19 | 7.61E-10 | 0.849  | 0.966 | v7.1          | OASIS |
| RH_transversetemporal_surfavg       | ICC3 | 0.905 | 20.00  | 19 | 19 | 8.95E-09 | 0.804  | 0.955 | v5.3          | OASIS |
| RH_transversetemporal_surfavg       | ICC2 | 0.731 | 6.29   | 19 | 19 | 9.89E-05 | 0.497  | 0.866 | v5.3 vs. v6.0 | OASIS |
| RH_transversetemporal_surfavg       | ICC2 | 0.705 | 5.56   | 19 | 19 | 2.34E-04 | 0.451  | 0.853 | v5.3 vs. v7.1 | OASIS |
| RH_transversetemporal_surfavg       | ICC3 | 0.914 | 22.28  | 19 | 19 | 3.49E-09 | 0.823  | 0.959 | v6.0          | OASIS |
| RH_transversetemporal_surfavg       | ICC2 | 0.933 | 33.38  | 19 | 19 | 9.60E-11 | 0.853  | 0.970 | v6.0 vs. v7.1 | OASIS |
| RH_transversetemporal_surfavg       | ICC3 | 0.977 | 85.42  | 19 | 19 | 1.73E-14 | 0.950  | 0.989 | v7.1          | OASIS |
| RH_transversetemporal_thickavg      | ICC3 | 0.934 | 29.25  | 19 | 19 | 3.14E-10 | 0.862  | 0.969 | v5.3          | OASIS |
| RH_transversetemporal_thickavg      | ICC2 | 0.783 | 21.44  | 19 | 19 | 4.88E-09 | 0.114  | 0.925 | v5.3 vs. v6.0 | OASIS |
| RH_transversetemporal_thickavg      | ICC2 | 0.854 | 26.96  | 19 | 19 | 6.48E-10 | 0.351  | 0.949 | v5.3 vs. v7.1 | OASIS |
| RH_transversetemporal_thickavg      | ICC3 | 0.914 | 22.25  | 19 | 19 | 3.53E-09 | 0.822  | 0.959 | v6.0          | OASIS |
| RH_transversetemporal_thickavg      | ICC2 | 0.924 | 27.99  | 19 | 19 | 4.65E-10 | 0.839  | 0.965 | v6.0 vs. v7.1 | OASIS |
| RH_transversetemporal_thickavg      | ICC3 | 0.967 | 58.88  | 19 | 19 | 5.43E-13 | 0.929  | 0.984 | v7.1          | OASIS |
| SUM_bankssts_surfavg                | ICC3 | 0.953 | 41.91  | 19 | 19 | 1.22E-11 | 0.902  | 0.978 | v5.3          | OASIS |
| SUM_bankssts_surfavg                | ICC2 | 0.737 | 7.60   | 19 | 19 | 2.46E-05 | 0.493  | 0.871 | v5.3 vs. v6.0 | OASIS |
| SUM_bankssts_surfavg                | ICC2 | 0.697 | 5.98   | 19 | 19 | 1.41E-04 | 0.448  | 0.847 | v5.3 vs. v7.1 | OASIS |
| SUM_bankssts_surfavg                | ICC3 | 0.953 | 41.63  | 19 | 19 | 1.30E-11 | 0.901  | 0.978 | v6.0          | OASIS |
| SUM_bankssts_surfavg                | ICC2 | 0.943 | 33.92  | 19 | 19 | 8.30E-11 | 0.883  | 0.973 | v6.0 vs. v7.1 | OASIS |
| SUM_bankssts_surfavg                | ICC3 | 0.898 | 18.54  | 19 | 19 | 1.72E-08 | 0.791  | 0.951 | v7.1          | OASIS |
| SUM_caudalanteriorcingulate_surfavg | ICC3 | 0.987 | 151.00 | 19 | 19 | 8.43E-17 | 0.972  | 0.994 | v5.3          | OASIS |
| SUM_caudalanteriorcingulate_surfavg | ICC2 | 0.886 | 42.90  | 19 | 19 | 9.88E-12 | 0.316  | 0.963 | v5.3 vs. v6.0 | OASIS |
| SUM_caudalanteriorcingulate_surfavg | ICC2 | 0.937 | 29.70  | 19 | 19 | 2.74E-10 | 0.869  | 0.970 | v5.3 vs. v7.1 | OASIS |
| SUM_caudalanteriorcingulate_surfavg | ICC3 | 0.969 | 64.35  | 19 | 19 | 2.39E-13 | 0.935  | 0.986 | v6.0          | OASIS |
| SUM_caudalanteriorcingulate_surfavg | ICC2 | 0.909 | 82.38  | 19 | 19 | 2.43E-14 | 0.187  | 0.974 | v6.0 vs. v7.1 | OASIS |
| SUM_caudalanteriorcingulate_surfavg | ICC3 | 0.964 | 54.18  | 19 | 19 | 1.17E-12 | 0.923  | 0.983 | v7.1          | OASIS |
| SUM_caudalmiddlefrontal_surfavg     | ICC3 | 0.977 | 87.74  | 19 | 19 | 1.35E-14 | 0.952  | 0.990 | v5.3          | OASIS |
| SUM_caudalmiddlefrontal_surfavg     | ICC2 | 0.945 | 38.17  | 19 | 19 | 2.86E-11 | 0.883  | 0.974 | v5.3 vs. v6.0 | OASIS |
| SUM_caudalmiddlefrontal_surfavg     | ICC2 | 0.947 | 40.32  | 19 | 19 | 1.74E-11 | 0.885  | 0.975 | v5.3 vs. v7.1 | OASIS |
| SUM_caudalmiddlefrontal_surfavg     | ICC3 | 0.988 | 170.09 | 19 | 19 | 2.76E-17 | 0.975  | 0.995 | v6.0          | OASIS |
| SUM_caudalmiddlefrontal_surfavg     | ICC2 | 0.987 | 145.41 | 19 | 19 | 1.20E-16 | 0.972  | 0.994 | v6.0 vs. v7.1 | OASIS |
| SUM_caudalmiddlefrontal_surfavg     | ICC3 | 0.975 | 78.34  | 19 | 19 | 3.87E-14 | 0.946  | 0.988 | v7.1          | OASIS |
| SUM_cuneus_surfavg                  | ICC3 | 0.963 | 53.47  | 19 | 19 | 1.32E-12 | 0.922  | 0.983 | v5.3          | OASIS |
| SUM_cuneus_surfavg                  | ICC2 | 0.874 | 29.02  | 19 | 19 | 3.37E-10 | 0.459  | 0.955 | v5.3 vs. v6.0 | OASIS |
| SUM_cuneus_surfavg                  | ICC2 | 0.765 | 30.09  | 19 | 19 | 2.43E-10 | 0.003  | 0.925 | v5.3 vs. v7.1 | OASIS |
| SUM_cuneus_surfavg                  | ICC3 | 0.994 | 333.93 | 19 | 19 | 4.77E-20 | 0.987  | 0.997 | v6.0          | OASIS |
| SUM_cuneus_surfavg                  | ICC2 | 0.946 | 131.71 | 19 | 19 | 3.04E-16 | 0.369  | 0.985 | v6.0 vs. v7.1 | OASIS |
| SUM_cuneus_surfavg                  | ICC3 | 0.996 | 485.95 | 19 | 19 | 1.37E-21 | 0.991  | 0.998 | v7.1          | OASIS |
| SUM_entorhinal_surfavg              | ICC3 | 0.780 | 8.10   | 19 | 19 | 1.51E-05 | 0.578  | 0.892 | v5.3          | OASIS |
| SUM_entorhinal_surfavg              | ICC2 | 0.398 | 4.74   | 19 | 19 | 6.88E-04 | -0.059 | 0.700 | v5.3 vs. v6.0 | OASIS |
| SUM_entorhinal_surfavg              | ICC2 | 0.489 | 5.82   | 19 | 19 | 1.71E-04 | -0.026 | 0.764 | v5.3 vs. v7.1 | OASIS |
| SUM_entorhinal_surfavg              | ICC3 | 0.964 | 54.58  | 19 | 19 | 1.09E-12 | 0.924  | 0.983 | v6.0          | OASIS |
| SUM_entorhinal_surfavg              | ICC2 | 0.773 | 9.51   | 19 | 19 | 4.34E-06 | 0.532  | 0.893 | v6.0 vs. v7.1 | OASIS |

|                                  |      |       |        |    |    |          |        |       |               |       |
|----------------------------------|------|-------|--------|----|----|----------|--------|-------|---------------|-------|
| SUM_entorhinal_surfavg           | ICC3 | 0.888 | 16.92  | 19 | 19 | 3.79E-08 | 0.773  | 0.947 | v7.1          | OASIS |
| SUM_frontalpole_surfavg          | ICC3 | 0.822 | 10.26  | 19 | 19 | 2.39E-06 | 0.651  | 0.914 | v5.3          | OASIS |
| SUM_frontalpole_surfavg          | ICC2 | 0.417 | 5.55   | 19 | 19 | 2.37E-04 | -0.064 | 0.721 | v5.3 vs. v6.0 | OASIS |
| SUM_frontalpole_surfavg          | ICC2 | 0.243 | 5.52   | 19 | 19 | 2.47E-04 | -0.054 | 0.568 | v5.3 vs. v7.1 | OASIS |
| SUM_frontalpole_surfavg          | ICC3 | 0.924 | 25.35  | 19 | 19 | 1.12E-09 | 0.842  | 0.964 | v6.0          | OASIS |
| SUM_frontalpole_surfavg          | ICC2 | 0.693 | 37.19  | 19 | 19 | 3.62E-11 | -0.027 | 0.902 | v6.0 vs. v7.1 | OASIS |
| SUM_frontalpole_surfavg          | ICC3 | 0.895 | 17.97  | 19 | 19 | 2.26E-08 | 0.785  | 0.950 | v7.1          | OASIS |
| SUM_fusiform_surfavg             | ICC3 | 0.978 | 88.08  | 19 | 19 | 1.30E-14 | 0.952  | 0.990 | v5.3          | OASIS |
| SUM_fusiform_surfavg             | ICC2 | 0.860 | 46.19  | 19 | 19 | 5.04E-12 | 0.124  | 0.957 | v5.3 vs. v6.0 | OASIS |
| SUM_fusiform_surfavg             | ICC2 | 0.876 | 32.67  | 19 | 19 | 1.16E-10 | 0.398  | 0.957 | v5.3 vs. v7.1 | OASIS |
| SUM_fusiform_surfavg             | ICC3 | 0.986 | 146.18 | 19 | 19 | 1.14E-16 | 0.971  | 0.994 | v6.0          | OASIS |
| SUM_fusiform_surfavg             | ICC2 | 0.983 | 150.98 | 19 | 19 | 8.44E-17 | 0.956  | 0.993 | v6.0 vs. v7.1 | OASIS |
| SUM_fusiform_surfavg             | ICC3 | 0.991 | 226.86 | 19 | 19 | 1.83E-18 | 0.981  | 0.996 | v7.1          | OASIS |
| SUM_inferiorparietal_surfavg     | ICC3 | 0.995 | 426.80 | 19 | 19 | 4.69E-21 | 0.990  | 0.998 | v5.3          | OASIS |
| SUM_inferiorparietal_surfavg     | ICC2 | 0.918 | 36.99  | 19 | 19 | 3.79E-11 | 0.713  | 0.968 | v5.3 vs. v6.0 | OASIS |
| SUM_inferiorparietal_surfavg     | ICC2 | 0.932 | 35.28  | 19 | 19 | 5.82E-11 | 0.836  | 0.970 | v5.3 vs. v7.1 | OASIS |
| SUM_inferiorparietal_surfavg     | ICC3 | 0.991 | 229.19 | 19 | 19 | 1.66E-18 | 0.981  | 0.996 | v6.0          | OASIS |
| SUM_inferiorparietal_surfavg     | ICC2 | 0.990 | 267.62 | 19 | 19 | 3.86E-19 | 0.968  | 0.996 | v6.0 vs. v7.1 | OASIS |
| SUM_inferiorparietal_surfavg     | ICC3 | 0.979 | 94.39  | 19 | 19 | 6.84E-15 | 0.955  | 0.990 | v7.1          | OASIS |
| SUM_inferiortemporal_surfavg     | ICC3 | 0.983 | 117.45 | 19 | 19 | 8.88E-16 | 0.964  | 0.992 | v5.3          | OASIS |
| SUM_inferiortemporal_surfavg     | ICC2 | 0.909 | 45.20  | 19 | 19 | 6.14E-12 | 0.507  | 0.969 | v5.3 vs. v6.0 | OASIS |
| SUM_inferiortemporal_surfavg     | ICC2 | 0.853 | 36.49  | 19 | 19 | 4.30E-11 | 0.182  | 0.953 | v5.3 vs. v7.1 | OASIS |
| SUM_inferiortemporal_surfavg     | ICC3 | 0.989 | 175.25 | 19 | 19 | 2.08E-17 | 0.976  | 0.995 | v6.0          | OASIS |
| SUM_inferiortemporal_surfavg     | ICC2 | 0.981 | 234.68 | 19 | 19 | 1.33E-18 | 0.851  | 0.994 | v6.0 vs. v7.1 | OASIS |
| SUM_inferiortemporal_surfavg     | ICC3 | 0.990 | 206.66 | 19 | 19 | 4.41E-18 | 0.979  | 0.996 | v7.1          | OASIS |
| SUM_insula_surfavg               | ICC3 | 0.963 | 53.72  | 19 | 19 | 1.26E-12 | 0.922  | 0.983 | v5.3          | OASIS |
| SUM_insula_surfavg               | ICC2 | 0.537 | 32.91  | 19 | 19 | 1.09E-10 | -0.024 | 0.830 | v5.3 vs. v6.0 | OASIS |
| SUM_insula_surfavg               | ICC2 | 0.600 | 20.47  | 19 | 19 | 7.32E-09 | -0.042 | 0.857 | v5.3 vs. v7.1 | OASIS |
| SUM_insula_surfavg               | ICC3 | 0.820 | 10.14  | 19 | 19 | 2.62E-06 | 0.648  | 0.913 | v6.0          | OASIS |
| SUM_insula_surfavg               | ICC2 | 0.873 | 15.07  | 19 | 19 | 1.01E-07 | 0.748  | 0.939 | v6.0 vs. v7.1 | OASIS |
| SUM_insula_surfavg               | ICC3 | 0.869 | 14.27  | 19 | 19 | 1.60E-07 | 0.736  | 0.937 | v7.1          | OASIS |
| SUM_isthmuscingulate_surfavg     | ICC3 | 0.962 | 51.47  | 19 | 19 | 1.87E-12 | 0.919  | 0.982 | v5.3          | OASIS |
| SUM_isthmuscingulate_surfavg     | ICC2 | 0.947 | 52.46  | 19 | 19 | 1.57E-12 | 0.834  | 0.978 | v5.3 vs. v6.0 | OASIS |
| SUM_isthmuscingulate_surfavg     | ICC2 | 0.908 | 42.82  | 19 | 19 | 1.01E-11 | 0.524  | 0.968 | v5.3 vs. v7.1 | OASIS |
| SUM_isthmuscingulate_surfavg     | ICC3 | 0.990 | 195.44 | 19 | 19 | 7.46E-18 | 0.978  | 0.995 | v6.0          | OASIS |
| SUM_isthmuscingulate_surfavg     | ICC2 | 0.985 | 282.76 | 19 | 19 | 2.29E-19 | 0.888  | 0.995 | v6.0 vs. v7.1 | OASIS |
| SUM_isthmuscingulate_surfavg     | ICC3 | 0.975 | 78.21  | 19 | 19 | 3.93E-14 | 0.946  | 0.988 | v7.1          | OASIS |
| SUM_lateraloccipital_surfavg     | ICC3 | 0.979 | 94.70  | 19 | 19 | 6.63E-15 | 0.955  | 0.990 | v5.3          | OASIS |
| SUM_lateraloccipital_surfavg     | ICC2 | 0.690 | 21.06  | 19 | 19 | 5.70E-09 | -0.026 | 0.894 | v5.3 vs. v6.0 | OASIS |
| SUM_lateraloccipital_surfavg     | ICC2 | 0.597 | 18.58  | 19 | 19 | 1.69E-08 | -0.045 | 0.854 | v5.3 vs. v7.1 | OASIS |
| SUM_lateraloccipital_surfavg     | ICC3 | 0.992 | 239.57 | 19 | 19 | 1.10E-18 | 0.982  | 0.996 | v6.0          | OASIS |
| SUM_lateraloccipital_surfavg     | ICC2 | 0.978 | 357.92 | 19 | 19 | 2.48E-20 | 0.582  | 0.994 | v6.0 vs. v7.1 | OASIS |
| SUM_lateraloccipital_surfavg     | ICC3 | 0.992 | 253.02 | 19 | 19 | 6.55E-19 | 0.983  | 0.996 | v7.1          | OASIS |
| SUM_lateralorbitofrontal_surfavg | ICC3 | 0.896 | 18.17  | 19 | 19 | 2.06E-08 | 0.787  | 0.950 | v5.3          | OASIS |

|                                  |      |       |        |    |    |          |        |       |               |       |
|----------------------------------|------|-------|--------|----|----|----------|--------|-------|---------------|-------|
| SUM_lateralorbitofrontal_surfavg | ICC2 | 0.893 | 36.80  | 19 | 19 | 3.98E-11 | 0.471  | 0.963 | v5.3 vs. v6.0 | OASIS |
| SUM_lateralorbitofrontal_surfavg | ICC2 | 0.729 | 31.15  | 19 | 19 | 1.79E-10 | -0.021 | 0.913 | v5.3 vs. v7.1 | OASIS |
| SUM_lateralorbitofrontal_surfavg | ICC3 | 0.944 | 34.98  | 19 | 19 | 6.30E-11 | 0.883  | 0.974 | v6.0          | OASIS |
| SUM_lateralorbitofrontal_surfavg | ICC2 | 0.862 | 35.52  | 19 | 19 | 5.49E-11 | 0.245  | 0.955 | v6.0 vs. v7.1 | OASIS |
| SUM_lateralorbitofrontal_surfavg | ICC3 | 0.943 | 34.26  | 19 | 19 | 7.59E-11 | 0.881  | 0.973 | v7.1          | OASIS |
| SUM_lingual_surfavg              | ICC3 | 0.987 | 150.51 | 19 | 19 | 8.69E-17 | 0.972  | 0.994 | v5.3          | OASIS |
| SUM_lingual_surfavg              | ICC2 | 0.952 | 41.66  | 19 | 19 | 1.29E-11 | 0.900  | 0.978 | v5.3 vs. v6.0 | OASIS |
| SUM_lingual_surfavg              | ICC2 | 0.919 | 38.41  | 19 | 19 | 2.70E-11 | 0.702  | 0.969 | v5.3 vs. v7.1 | OASIS |
| SUM_lingual_surfavg              | ICC3 | 0.996 | 460.13 | 19 | 19 | 2.30E-21 | 0.991  | 0.998 | v6.0          | OASIS |
| SUM_lingual_surfavg              | ICC2 | 0.981 | 395.33 | 19 | 19 | 9.67E-21 | 0.647  | 0.995 | v6.0 vs. v7.1 | OASIS |
| SUM_lingual_surfavg              | ICC3 | 0.996 | 526.94 | 19 | 19 | 6.38E-22 | 0.992  | 0.998 | v7.1          | OASIS |
| SUM_medialorbitofrontal_surfavg  | ICC3 | 0.860 | 13.25  | 19 | 19 | 2.97E-07 | 0.719  | 0.933 | v5.3          | OASIS |
| SUM_medialorbitofrontal_surfavg  | ICC2 | 0.800 | 13.29  | 19 | 19 | 2.89E-07 | 0.474  | 0.915 | v5.3 vs. v6.0 | OASIS |
| SUM_medialorbitofrontal_surfavg  | ICC2 | 0.382 | 16.17  | 19 | 19 | 5.57E-08 | -0.032 | 0.722 | v5.3 vs. v7.1 | OASIS |
| SUM_medialorbitofrontal_surfavg  | ICC3 | 0.922 | 24.52  | 19 | 19 | 1.50E-09 | 0.838  | 0.963 | v6.0          | OASIS |
| SUM_medialorbitofrontal_surfavg  | ICC2 | 0.531 | 32.62  | 19 | 19 | 1.18E-10 | -0.024 | 0.826 | v6.0 vs. v7.1 | OASIS |
| SUM_medialorbitofrontal_surfavg  | ICC3 | 0.926 | 26.03  | 19 | 19 | 8.87E-10 | 0.846  | 0.965 | v7.1          | OASIS |
| SUM_middletemporal_surfavg       | ICC3 | 0.987 | 157.67 | 19 | 19 | 5.62E-17 | 0.973  | 0.994 | v5.3          | OASIS |
| SUM_middletemporal_surfavg       | ICC2 | 0.904 | 105.41 | 19 | 19 | 2.44E-15 | 0.103  | 0.973 | v5.3 vs. v6.0 | OASIS |
| SUM_middletemporal_surfavg       | ICC2 | 0.836 | 106.09 | 19 | 19 | 2.30E-15 | 0.007  | 0.954 | v5.3 vs. v7.1 | OASIS |
| SUM_middletemporal_surfavg       | ICC3 | 0.993 | 304.54 | 19 | 19 | 1.14E-19 | 0.986  | 0.997 | v6.0          | OASIS |
| SUM_middletemporal_surfavg       | ICC2 | 0.979 | 268.30 | 19 | 19 | 3.76E-19 | 0.751  | 0.994 | v6.0 vs. v7.1 | OASIS |
| SUM_middletemporal_surfavg       | ICC3 | 0.990 | 193.37 | 19 | 19 | 8.25E-18 | 0.978  | 0.995 | v7.1          | OASIS |
| SUM_paracentral_surfavg          | ICC3 | 0.981 | 102.33 | 19 | 19 | 3.22E-15 | 0.959  | 0.991 | v5.3          | OASIS |
| SUM_paracentral_surfavg          | ICC2 | 0.910 | 21.17  | 19 | 19 | 5.45E-09 | 0.817  | 0.957 | v5.3 vs. v6.0 | OASIS |
| SUM_paracentral_surfavg          | ICC2 | 0.927 | 25.35  | 19 | 19 | 1.12E-09 | 0.849  | 0.966 | v5.3 vs. v7.1 | OASIS |
| SUM_paracentral_surfavg          | ICC3 | 0.987 | 149.43 | 19 | 19 | 9.30E-17 | 0.971  | 0.994 | v6.0          | OASIS |
| SUM_paracentral_surfavg          | ICC2 | 0.990 | 278.14 | 19 | 19 | 2.68E-19 | 0.969  | 0.996 | v6.0 vs. v7.1 | OASIS |
| SUM_paracentral_surfavg          | ICC3 | 0.978 | 92.01  | 19 | 19 | 8.68E-15 | 0.954  | 0.990 | v7.1          | OASIS |
| SUM parahippocampal_surfavg      | ICC3 | 0.937 | 30.53  | 19 | 19 | 2.14E-10 | 0.867  | 0.970 | v5.3          | OASIS |
| SUM parahippocampal_surfavg      | ICC2 | 0.659 | 9.69   | 19 | 19 | 3.75E-06 | 0.088  | 0.861 | v5.3 vs. v6.0 | OASIS |
| SUM parahippocampal_surfavg      | ICC2 | 0.494 | 6.51   | 19 | 19 | 7.66E-05 | -0.041 | 0.773 | v5.3 vs. v7.1 | OASIS |
| SUM parahippocampal_surfavg      | ICC3 | 0.944 | 34.46  | 19 | 19 | 7.21E-11 | 0.882  | 0.974 | v6.0          | OASIS |
| SUM parahippocampal_surfavg      | ICC2 | 0.866 | 21.68  | 19 | 19 | 4.43E-09 | 0.583  | 0.946 | v6.0 vs. v7.1 | OASIS |
| SUM parahippocampal_surfavg      | ICC3 | 0.957 | 45.14  | 19 | 19 | 6.21E-12 | 0.908  | 0.980 | v7.1          | OASIS |
| SUM_parsopercularis_surfavg      | ICC3 | 0.975 | 79.42  | 19 | 19 | 3.41E-14 | 0.947  | 0.988 | v5.3          | OASIS |
| SUM_parsopercularis_surfavg      | ICC2 | 0.937 | 42.04  | 19 | 19 | 1.19E-11 | 0.822  | 0.974 | v5.3 vs. v6.0 | OASIS |
| SUM_parsopercularis_surfavg      | ICC2 | 0.950 | 44.80  | 19 | 19 | 6.65E-12 | 0.888  | 0.977 | v5.3 vs. v7.1 | OASIS |
| SUM_parsopercularis_surfavg      | ICC3 | 0.983 | 115.22 | 19 | 19 | 1.06E-15 | 0.963  | 0.992 | v6.0          | OASIS |
| SUM_parsopercularis_surfavg      | ICC2 | 0.990 | 275.92 | 19 | 19 | 2.89E-19 | 0.972  | 0.996 | v6.0 vs. v7.1 | OASIS |
| SUM_parsopercularis_surfavg      | ICC3 | 0.988 | 170.48 | 19 | 19 | 2.70E-17 | 0.975  | 0.995 | v7.1          | OASIS |
| SUM_parsorbitalis_surfavg        | ICC3 | 0.924 | 25.37  | 19 | 19 | 1.11E-09 | 0.843  | 0.964 | v5.3          | OASIS |
| SUM_parsorbitalis_surfavg        | ICC2 | 0.509 | 21.79  | 19 | 19 | 4.25E-09 | -0.035 | 0.811 | v5.3 vs. v6.0 | OASIS |
| SUM_parsorbitalis_surfavg        | ICC2 | 0.402 | 20.57  | 19 | 19 | 7.02E-09 | -0.027 | 0.740 | v5.3 vs. v7.1 | OASIS |



|                                      |      |       |        |    |    |          |       |       |               |       |
|--------------------------------------|------|-------|--------|----|----|----------|-------|-------|---------------|-------|
| SUM_parsorbitalis_surfavg            | ICC3 | 0.960 | 48.53  | 19 | 19 | 3.21E-12 | 0.914 | 0.981 | v6.0          | OASIS |
| SUM_parsorbitalis_surfavg            | ICC2 | 0.924 | 82.01  | 19 | 19 | 2.53E-14 | 0.325 | 0.977 | v6.0 vs. v7.1 | OASIS |
| SUM_parsorbitalis_surfavg            | ICC3 | 0.974 | 77.07  | 19 | 19 | 4.50E-14 | 0.945 | 0.988 | v7.1          | OASIS |
| SUM_parstriangularis_surfavg         | ICC3 | 0.974 | 74.58  | 19 | 19 | 6.11E-14 | 0.943 | 0.988 | v5.3          | OASIS |
| SUM_parstriangularis_surfavg         | ICC2 | 0.923 | 36.63  | 19 | 19 | 4.15E-11 | 0.760 | 0.969 | v5.3 vs. v6.0 | OASIS |
| SUM_parstriangularis_surfavg         | ICC2 | 0.908 | 42.89  | 19 | 19 | 9.90E-12 | 0.532 | 0.968 | v5.3 vs. v7.1 | OASIS |
| SUM_parstriangularis_surfavg         | ICC3 | 0.989 | 188.48 | 19 | 19 | 1.05E-17 | 0.977 | 0.995 | v6.0          | OASIS |
| SUM_parstriangularis_surfavg         | ICC2 | 0.988 | 245.60 | 19 | 19 | 8.67E-19 | 0.957 | 0.995 | v6.0 vs. v7.1 | OASIS |
| SUM_parstriangularis_surfavg         | ICC3 | 0.993 | 281.61 | 19 | 19 | 2.38E-19 | 0.985 | 0.997 | v7.1          | OASIS |
| SUM_pericalcarine_surfavg            | ICC3 | 0.960 | 48.54  | 19 | 19 | 3.20E-12 | 0.914 | 0.981 | v5.3          | OASIS |
| SUM_pericalcarine_surfavg            | ICC2 | 0.949 | 76.10  | 19 | 19 | 5.07E-14 | 0.710 | 0.982 | v5.3 vs. v6.0 | OASIS |
| SUM_pericalcarine_surfavg            | ICC2 | 0.911 | 52.03  | 19 | 19 | 1.69E-12 | 0.434 | 0.971 | v5.3 vs. v7.1 | OASIS |
| SUM_pericalcarine_surfavg            | ICC3 | 0.993 | 288.97 | 19 | 19 | 1.87E-19 | 0.985 | 0.997 | v6.0          | OASIS |
| SUM_pericalcarine_surfavg            | ICC2 | 0.987 | 246.96 | 19 | 19 | 8.23E-19 | 0.944 | 0.995 | v6.0 vs. v7.1 | OASIS |
| SUM_pericalcarine_surfavg            | ICC3 | 0.990 | 193.95 | 19 | 19 | 8.02E-18 | 0.978 | 0.995 | v7.1          | OASIS |
| SUM_postcentral_surfavg              | ICC3 | 0.984 | 127.63 | 19 | 19 | 4.08E-16 | 0.967 | 0.993 | v5.3          | OASIS |
| SUM_postcentral_surfavg              | ICC2 | 0.920 | 27.17  | 19 | 19 | 6.05E-10 | 0.827 | 0.963 | v5.3 vs. v6.0 | OASIS |
| SUM_postcentral_surfavg              | ICC2 | 0.926 | 24.91  | 19 | 19 | 1.31E-09 | 0.846 | 0.965 | v5.3 vs. v7.1 | OASIS |
| SUM_postcentral_surfavg              | ICC3 | 0.990 | 202.26 | 19 | 19 | 5.40E-18 | 0.979 | 0.995 | v6.0          | OASIS |
| SUM_postcentral_surfavg              | ICC2 | 0.985 | 399.91 | 19 | 19 | 8.67E-21 | 0.797 | 0.996 | v6.0 vs. v7.1 | OASIS |
| SUM_postcentral_surfavg              | ICC3 | 0.988 | 169.65 | 19 | 19 | 2.82E-17 | 0.975 | 0.995 | v7.1          | OASIS |
| SUM_posteriorcingulate_surfavg       | ICC3 | 0.975 | 79.94  | 19 | 19 | 3.21E-14 | 0.947 | 0.989 | v5.3          | OASIS |
| SUM_posteriorcingulate_surfavg       | ICC2 | 0.978 | 89.54  | 19 | 19 | 1.12E-14 | 0.954 | 0.990 | v5.3 vs. v6.0 | OASIS |
| SUM_posteriorcingulate_surfavg       | ICC2 | 0.961 | 109.08 | 19 | 19 | 1.77E-15 | 0.729 | 0.987 | v5.3 vs. v7.1 | OASIS |
| SUM_posteriorcingulate_surfavg       | ICC3 | 0.986 | 137.47 | 19 | 19 | 2.03E-16 | 0.969 | 0.993 | v6.0          | OASIS |
| SUM_posteriorcingulate_surfavg       | ICC2 | 0.980 | 421.79 | 19 | 19 | 5.24E-21 | 0.566 | 0.994 | v6.0 vs. v7.1 | OASIS |
| SUM_posteriorcingulate_surfavg       | ICC3 | 0.984 | 121.22 | 19 | 19 | 6.61E-16 | 0.965 | 0.992 | v7.1          | OASIS |
| SUM_precentral_surfavg               | ICC3 | 0.870 | 14.44  | 19 | 19 | 1.45E-07 | 0.739 | 0.938 | v5.3          | OASIS |
| SUM_precentral_surfavg               | ICC2 | 0.912 | 20.74  | 19 | 19 | 6.52E-09 | 0.818 | 0.959 | v5.3 vs. v6.0 | OASIS |
| SUM_precentral_surfavg               | ICC2 | 0.915 | 21.92  | 19 | 19 | 4.03E-09 | 0.826 | 0.960 | v5.3 vs. v7.1 | OASIS |
| SUM_precentral_surfavg               | ICC3 | 0.992 | 244.30 | 19 | 19 | 9.11E-19 | 0.982 | 0.996 | v6.0          | OASIS |
| SUM_precentral_surfavg               | ICC2 | 0.990 | 233.51 | 19 | 19 | 1.40E-18 | 0.978 | 0.996 | v6.0 vs. v7.1 | OASIS |
| SUM_precentral_surfavg               | ICC3 | 0.972 | 70.65  | 19 | 19 | 1.01E-13 | 0.940 | 0.987 | v7.1          | OASIS |
| SUM_precuneus_surfavg                | ICC3 | 0.922 | 24.64  | 19 | 19 | 1.44E-09 | 0.838 | 0.963 | v5.3          | OASIS |
| SUM_precuneus_surfavg                | ICC2 | 0.985 | 147.97 | 19 | 19 | 1.02E-16 | 0.967 | 0.993 | v5.3 vs. v6.0 | OASIS |
| SUM_precuneus_surfavg                | ICC2 | 0.980 | 114.87 | 19 | 19 | 1.09E-15 | 0.955 | 0.991 | v5.3 vs. v7.1 | OASIS |
| SUM_precuneus_surfavg                | ICC3 | 0.991 | 222.09 | 19 | 19 | 2.24E-18 | 0.981 | 0.996 | v6.0          | OASIS |
| SUM_precuneus_surfavg                | ICC2 | 0.997 | 648.10 | 19 | 19 | 8.98E-23 | 0.993 | 0.999 | v6.0 vs. v7.1 | OASIS |
| SUM_precuneus_surfavg                | ICC3 | 0.948 | 37.36  | 19 | 19 | 3.47E-11 | 0.890 | 0.976 | v7.1          | OASIS |
| SUM_rostralanteriorcingulate_surfavg | ICC3 | 0.948 | 37.53  | 19 | 19 | 3.33E-11 | 0.891 | 0.976 | v5.3          | OASIS |
| SUM_rostralanteriorcingulate_surfavg | ICC2 | 0.894 | 38.69  | 19 | 19 | 2.53E-11 | 0.452 | 0.964 | v5.3 vs. v6.0 | OASIS |
| SUM_rostralanteriorcingulate_surfavg | ICC2 | 0.893 | 16.88  | 19 | 19 | 3.87E-08 | 0.781 | 0.949 | v5.3 vs. v7.1 | OASIS |
| SUM_rostralanteriorcingulate_surfavg | ICC3 | 0.957 | 45.69  | 19 | 19 | 5.57E-12 | 0.909 | 0.980 | v6.0          | OASIS |
| SUM_rostralanteriorcingulate_surfavg | ICC2 | 0.893 | 43.20  | 19 | 19 | 9.27E-12 | 0.371 | 0.965 | v6.0 vs. v7.1 | OASIS |

|                                      |      |       |        |    |    |          |        |       |               |       |
|--------------------------------------|------|-------|--------|----|----|----------|--------|-------|---------------|-------|
| SUM_rostralanteriorcingulate_surfavg | ICC3 | 0.884 | 16.23  | 19 | 19 | 5.39E-08 | 0.764  | 0.945 | v7.1          | OASIS |
| SUM_rostralmiddlefrontal_surfavg     | ICC3 | 0.980 | 99.75  | 19 | 19 | 4.09E-15 | 0.957  | 0.991 | v5.3          | OASIS |
| SUM_rostralmiddlefrontal_surfavg     | ICC2 | 0.962 | 52.41  | 19 | 19 | 1.58E-12 | 0.920  | 0.982 | v5.3 vs. v6.0 | OASIS |
| SUM_rostralmiddlefrontal_surfavg     | ICC2 | 0.919 | 36.65  | 19 | 19 | 4.13E-11 | 0.729  | 0.968 | v5.3 vs. v7.1 | OASIS |
| SUM_rostralmiddlefrontal_surfavg     | ICC3 | 0.986 | 146.13 | 19 | 19 | 1.15E-16 | 0.971  | 0.994 | v6.0          | OASIS |
| SUM_rostralmiddlefrontal_surfavg     | ICC2 | 0.972 | 173.84 | 19 | 19 | 2.24E-17 | 0.743  | 0.991 | v6.0 vs. v7.1 | OASIS |
| SUM_rostralmiddlefrontal_surfavg     | ICC3 | 0.970 | 65.04  | 19 | 19 | 2.17E-13 | 0.935  | 0.986 | v7.1          | OASIS |
| SUM_superiorfrontal_surfavg          | ICC3 | 0.985 | 135.45 | 19 | 19 | 2.34E-16 | 0.968  | 0.993 | v5.3          | OASIS |
| SUM_superiorfrontal_surfavg          | ICC2 | 0.933 | 83.68  | 19 | 19 | 2.10E-14 | 0.415  | 0.980 | v5.3 vs. v6.0 | OASIS |
| SUM_superiorfrontal_surfavg          | ICC2 | 0.868 | 68.25  | 19 | 19 | 1.39E-13 | 0.063  | 0.962 | v5.3 vs. v7.1 | OASIS |
| SUM_superiorfrontal_surfavg          | ICC3 | 0.988 | 172.16 | 19 | 19 | 2.46E-17 | 0.975  | 0.995 | v6.0          | OASIS |
| SUM_superiorfrontal_surfavg          | ICC2 | 0.973 | 187.59 | 19 | 19 | 1.10E-17 | 0.731  | 0.992 | v6.0 vs. v7.1 | OASIS |
| SUM_superiorfrontal_surfavg          | ICC3 | 0.963 | 53.18  | 19 | 19 | 1.39E-12 | 0.922  | 0.983 | v7.1          | OASIS |
| SUM_superiorparietal_surfavg         | ICC3 | 0.936 | 30.43  | 19 | 19 | 2.20E-10 | 0.867  | 0.970 | v5.3          | OASIS |
| SUM_superiorparietal_surfavg         | ICC2 | 0.956 | 42.96  | 19 | 19 | 9.76E-12 | 0.908  | 0.980 | v5.3 vs. v6.0 | OASIS |
| SUM_superiorparietal_surfavg         | ICC2 | 0.955 | 44.75  | 19 | 19 | 6.73E-12 | 0.906  | 0.979 | v5.3 vs. v7.1 | OASIS |
| SUM_superiorparietal_surfavg         | ICC3 | 0.996 | 509.35 | 19 | 19 | 8.79E-22 | 0.992  | 0.998 | v6.0          | OASIS |
| SUM_superiorparietal_surfavg         | ICC2 | 0.991 | 506.40 | 19 | 19 | 9.29E-22 | 0.928  | 0.997 | v6.0 vs. v7.1 | OASIS |
| SUM_superiorparietal_surfavg         | ICC3 | 0.897 | 18.46  | 19 | 19 | 1.79E-08 | 0.790  | 0.951 | v7.1          | OASIS |
| SUM_superiortemporal_surfavg         | ICC3 | 0.991 | 229.36 | 19 | 19 | 1.65E-18 | 0.981  | 0.996 | v5.3          | OASIS |
| SUM_superiortemporal_surfavg         | ICC2 | 0.925 | 96.22  | 19 | 19 | 5.72E-15 | 0.253  | 0.978 | v5.3 vs. v6.0 | OASIS |
| SUM_superiortemporal_surfavg         | ICC2 | 0.871 | 58.60  | 19 | 19 | 5.68E-13 | 0.100  | 0.962 | v5.3 vs. v7.1 | OASIS |
| SUM_superiortemporal_surfavg         | ICC3 | 0.995 | 417.37 | 19 | 19 | 5.79E-21 | 0.990  | 0.998 | v6.0          | OASIS |
| SUM_superiortemporal_surfavg         | ICC2 | 0.988 | 401.17 | 19 | 19 | 8.42E-21 | 0.870  | 0.996 | v6.0 vs. v7.1 | OASIS |
| SUM_superiortemporal_surfavg         | ICC3 | 0.992 | 241.25 | 19 | 19 | 1.03E-18 | 0.982  | 0.996 | v7.1          | OASIS |
| SUM_supramarginal_surfavg            | ICC3 | 0.985 | 132.96 | 19 | 19 | 2.78E-16 | 0.968  | 0.993 | v5.3          | OASIS |
| SUM_supramarginal_surfavg            | ICC2 | 0.909 | 25.68  | 19 | 19 | 1.00E-09 | 0.787  | 0.959 | v5.3 vs. v6.0 | OASIS |
| SUM_supramarginal_surfavg            | ICC2 | 0.872 | 22.71  | 19 | 19 | 2.96E-09 | 0.603  | 0.949 | v5.3 vs. v7.1 | OASIS |
| SUM_supramarginal_surfavg            | ICC3 | 0.994 | 333.34 | 19 | 19 | 4.85E-20 | 0.987  | 0.997 | v6.0          | OASIS |
| SUM_supramarginal_surfavg            | ICC2 | 0.990 | 614.47 | 19 | 19 | 1.49E-22 | 0.850  | 0.997 | v6.0 vs. v7.1 | OASIS |
| SUM_supramarginal_surfavg            | ICC3 | 0.984 | 120.25 | 19 | 19 | 7.12E-16 | 0.965  | 0.992 | v7.1          | OASIS |
| SUM_SurfArea                         | ICC3 | 0.994 | 359.49 | 19 | 19 | 2.37E-20 | 0.988  | 0.997 | v5.3          | OASIS |
| SUM_SurfArea                         | ICC2 | 0.979 | 713.56 | 19 | 19 | 3.61E-23 | 0.356  | 0.995 | v5.3 vs. v6.0 | OASIS |
| SUM_SurfArea                         | ICC2 | 0.919 | 462.33 | 19 | 19 | 2.20E-21 | 0.049  | 0.980 | v5.3 vs. v7.1 | OASIS |
| SUM_SurfArea                         | ICC3 | 0.996 | 499.98 | 19 | 19 | 1.05E-21 | 0.991  | 0.998 | v6.0          | OASIS |
| SUM_SurfArea                         | ICC2 | 0.976 | 904.07 | 19 | 19 | 3.83E-24 | 0.251  | 0.994 | v6.0 vs. v7.1 | OASIS |
| SUM_SurfArea                         | ICC3 | 0.995 | 374.70 | 19 | 19 | 1.61E-20 | 0.988  | 0.998 | v7.1          | OASIS |
| SUM_temporalpole_surfavg             | ICC3 | 0.807 | 9.35   | 19 | 19 | 4.97E-06 | 0.624  | 0.906 | v5.3          | OASIS |
| SUM_temporalpole_surfavg             | ICC2 | 0.701 | 7.78   | 19 | 19 | 2.06E-05 | 0.354  | 0.861 | v5.3 vs. v6.0 | OASIS |
| SUM_temporalpole_surfavg             | ICC2 | 0.316 | 4.08   | 19 | 19 | 1.79E-03 | -0.073 | 0.631 | v5.3 vs. v7.1 | OASIS |
| SUM_temporalpole_surfavg             | ICC3 | 0.840 | 11.53  | 19 | 19 | 9.33E-07 | 0.683  | 0.923 | v6.0          | OASIS |
| SUM_temporalpole_surfavg             | ICC2 | 0.617 | 10.61  | 19 | 19 | 1.82E-06 | -0.010 | 0.850 | v6.0 vs. v7.1 | OASIS |
| SUM_temporalpole_surfavg             | ICC3 | 0.866 | 13.96  | 19 | 19 | 1.93E-07 | 0.731  | 0.936 | v7.1          | OASIS |
| SUM_transversetemporal_surfavg       | ICC3 | 0.952 | 40.94  | 19 | 19 | 1.51E-11 | 0.899  | 0.978 | v5.3          | OASIS |

|                              |      |       |       |    |    |          |       |       |               |       |
|------------------------------|------|-------|-------|----|----|----------|-------|-------|---------------|-------|
| SUM_transversetemporal_surfg | ICC2 | 0.789 | 8.52  | 19 | 19 | 1.03E-05 | 0.597 | 0.896 | v5.3 vs. v6.0 | OASIS |
| SUM_transversetemporal_surfg | ICC2 | 0.749 | 6.72  | 19 | 19 | 6.12E-05 | 0.524 | 0.876 | v5.3 vs. v7.1 | OASIS |
| SUM_transversetemporal_surfg | ICC3 | 0.957 | 45.19 | 19 | 19 | 6.16E-12 | 0.908 | 0.980 | v6.0          | OASIS |
| SUM_transversetemporal_surfg | ICC2 | 0.966 | 62.44 | 19 | 19 | 3.16E-13 | 0.927 | 0.984 | v6.0 vs. v7.1 | OASIS |
| SUM_transversetemporal_surfg | ICC3 | 0.976 | 83.84 | 19 | 19 | 2.06E-14 | 0.950 | 0.989 | v7.1          | OASIS |

**Table S6. HNU specific ICCs and associated statistics.**

| ROI                                  | Type | ICC   | F      | df1 | df2 | p         | lower bound | upper bound | comparison    | dataset |
|--------------------------------------|------|-------|--------|-----|-----|-----------|-------------|-------------|---------------|---------|
| AVG_Accumbens                        | ICC3 | 0.703 | 24.63  | 26  | 234 | 6.66E-53  | 0.5994      | 0.8054      | v5.3          | HNU     |
| AVG_Accumbens                        | ICC2 | 0.547 | 7.63   | 26  | 26  | 9.03E-07  | -0.0148     | 0.7971      | v5.3 vs. v6.0 | HNU     |
| AVG_Accumbens                        | ICC2 | 0.643 | 9.49   | 26  | 26  | 9.20E-08  | 0.0715      | 0.8469      | v5.3 vs. v7.1 | HNU     |
| AVG_Accumbens                        | ICC3 | 0.851 | 58.01  | 26  | 234 | 4.62E-87  | 0.7854      | 0.9081      | v6.0          | HNU     |
| AVG_Accumbens                        | ICC2 | 0.905 | 21.08  | 26  | 26  | 1.05E-11  | 0.8247      | 0.9497      | v6.0 vs. v7.1 | HNU     |
| AVG_Accumbens                        | ICC3 | 0.837 | 52.29  | 26  | 234 | 1.33E-82  | 0.7668      | 0.8990      | v7.1          | HNU     |
| AVG_Amygdala                         | ICC3 | 0.792 | 39.08  | 26  | 234 | 1.60E-70  | 0.7087      | 0.8689      | v5.3          | HNU     |
| AVG_Amygdala                         | ICC2 | 0.761 | 8.39   | 26  | 26  | 3.40E-07  | 0.5677      | 0.8712      | v5.3 vs. v6.0 | HNU     |
| AVG_Amygdala                         | ICC2 | 0.752 | 7.89   | 26  | 26  | 6.43E-07  | 0.5600      | 0.8650      | v5.3 vs. v7.1 | HNU     |
| AVG_Amygdala                         | ICC3 | 0.850 | 57.88  | 26  | 234 | 5.73E-87  | 0.7850      | 0.9079      | v6.0          | HNU     |
| AVG_Amygdala                         | ICC2 | 0.894 | 17.43  | 26  | 26  | 9.88E-11  | 0.8061      | 0.9439      | v6.0 vs. v7.1 | HNU     |
| AVG_Amygdala                         | ICC3 | 0.824 | 47.92  | 26  | 234 | 6.40E-79  | 0.7504      | 0.8907      | v7.1          | HNU     |
| AVG_bankssts_thickavg                | ICC3 | 0.695 | 23.82  | 26  | 234 | 1.06E-51  | 0.5908      | 0.8000      | v5.3          | HNU     |
| AVG_bankssts_thickavg                | ICC2 | 0.745 | 9.95   | 26  | 26  | 5.52E-08  | 0.4115      | 0.8789      | v5.3 vs. v6.0 | HNU     |
| AVG_bankssts_thickavg                | ICC2 | 0.776 | 8.06   | 26  | 26  | 5.14E-07  | 0.6117      | 0.8767      | v5.3 vs. v7.1 | HNU     |
| AVG_bankssts_thickavg                | ICC3 | 0.794 | 39.50  | 26  | 234 | 5.92E-71  | 0.7110      | 0.8701      | v6.0          | HNU     |
| AVG_bankssts_thickavg                | ICC2 | 0.870 | 22.29  | 26  | 26  | 5.38E-12  | 0.6184      | 0.9438      | v6.0 vs. v7.1 | HNU     |
| AVG_bankssts_thickavg                | ICC3 | 0.783 | 37.03  | 26  | 234 | 2.33E-68  | 0.6969      | 0.8625      | v7.1          | HNU     |
| AVG_caudalanteriorcingulate_thickavg | ICC3 | 0.769 | 34.32  | 26  | 234 | 2.35E-65  | 0.6799      | 0.8531      | v5.3          | HNU     |
| AVG_caudalanteriorcingulate_thickavg | ICC2 | 0.771 | 16.40  | 26  | 26  | 2.01E-10  | 0.2069      | 0.9104      | v5.3 vs. v6.0 | HNU     |
| AVG_caudalanteriorcingulate_thickavg | ICC2 | 0.888 | 19.49  | 26  | 26  | 2.66E-11  | 0.7792      | 0.9425      | v5.3 vs. v7.1 | HNU     |
| AVG_caudalanteriorcingulate_thickavg | ICC3 | 0.835 | 51.72  | 26  | 234 | 3.88E-82  | 0.7648      | 0.8980      | v6.0          | HNU     |
| AVG_caudalanteriorcingulate_thickavg | ICC2 | 0.713 | 36.06  | 26  | 26  | 1.54E-14  | -0.0245     | 0.9054      | v6.0 vs. v7.1 | HNU     |
| AVG_caudalanteriorcingulate_thickavg | ICC3 | 0.861 | 62.78  | 26  | 234 | 1.66E-90  | 0.7987      | 0.9146      | v7.1          | HNU     |
| AVG_caudalmiddlefrontal_thickavg     | ICC3 | 0.859 | 61.98  | 26  | 234 | 6.01E-90  | 0.7966      | 0.9136      | v5.3          | HNU     |
| AVG_caudalmiddlefrontal_thickavg     | ICC2 | 0.657 | 32.28  | 26  | 26  | 6.03E-14  | -0.0303     | 0.8822      | v5.3 vs. v6.0 | HNU     |
| AVG_caudalmiddlefrontal_thickavg     | ICC2 | 0.741 | 22.49  | 26  | 26  | 4.85E-12  | 0.0141      | 0.9090      | v5.3 vs. v7.1 | HNU     |
| AVG_caudalmiddlefrontal_thickavg     | ICC3 | 0.906 | 97.68  | 26  | 234 | 2.10E-110 | 0.8617      | 0.9435      | v6.0          | HNU     |
| AVG_caudalmiddlefrontal_thickavg     | ICC2 | 0.892 | 26.20  | 26  | 26  | 7.69E-13  | 0.6871      | 0.9527      | v6.0 vs. v7.1 | HNU     |
| AVG_caudalmiddlefrontal_thickavg     | ICC3 | 0.879 | 73.99  | 26  | 234 | 8.87E-98  | 0.8244      | 0.9266      | v7.1          | HNU     |
| AVG_Caudate                          | ICC3 | 0.969 | 315.32 | 26  | 234 | 1.37E-166 | 0.9531      | 0.9819      | v5.3          | HNU     |
| AVG_Caudate                          | ICC2 | 0.863 | 85.48  | 26  | 26  | 3.02E-19  | 0.0343      | 0.9600      | v5.3 vs. v6.0 | HNU     |
| AVG_Caudate                          | ICC2 | 0.898 | 69.67  | 26  | 26  | 4.05E-18  | 0.1842      | 0.9688      | v5.3 vs. v7.1 | HNU     |
| AVG_Caudate                          | ICC3 | 0.979 | 456.21 | 26  | 234 | 7.05E-185 | 0.9672      | 0.9874      | v6.0          | HNU     |
| AVG_Caudate                          | ICC2 | 0.983 | 200.04 | 26  | 26  | 5.61E-24  | 0.9266      | 0.9934      | v6.0 vs. v7.1 | HNU     |
| AVG_Caudate                          | ICC3 | 0.984 | 618.27 | 26  | 234 | 4.87E-200 | 0.9756      | 0.9907      | v7.1          | HNU     |
| AVG_cuneus_thickavg                  | ICC3 | 0.801 | 41.13  | 26  | 234 | 1.36E-72  | 0.7195      | 0.8747      | v5.3          | HNU     |
| AVG_cuneus_thickavg                  | ICC2 | 0.687 | 13.63  | 26  | 26  | 1.69E-09  | 0.0384      | 0.8780      | v5.3 vs. v6.0 | HNU     |
| AVG_cuneus_thickavg                  | ICC2 | 0.789 | 13.20  | 26  | 26  | 2.43E-09  | 0.4456      | 0.9056      | v5.3 vs. v7.1 | HNU     |
| AVG_cuneus_thickavg                  | ICC3 | 0.828 | 49.19  | 26  | 234 | 5.17E-80  | 0.7554      | 0.8932      | v6.0          | HNU     |
| AVG_cuneus_thickavg                  | ICC2 | 0.875 | 20.04  | 26  | 26  | 1.91E-11  | 0.7039      | 0.9408      | v6.0 vs. v7.1 | HNU     |

|                               |      |       |        |    |     |           |         |        |               |     |
|-------------------------------|------|-------|--------|----|-----|-----------|---------|--------|---------------|-----|
| AVG_cuneus_thickavg           | ICC3 | 0.826 | 48.60  | 26 | 234 | 1.66E-79  | 0.7530  | 0.8921 | v7.1          | HNU |
| AVG_entorhinal_thickavg       | ICC3 | 0.627 | 17.81  | 26 | 234 | 6.90E-42  | 0.5132  | 0.7478 | v5.3          | HNU |
| AVG_entorhinal_thickavg       | ICC2 | 0.807 | 10.14  | 26 | 26  | 4.50E-08  | 0.6545  | 0.8957 | v5.3 vs. v6.0 | HNU |
| AVG_entorhinal_thickavg       | ICC2 | 0.586 | 7.67   | 26 | 26  | 8.57E-07  | 0.0373  | 0.8134 | v5.3 vs. v7.1 | HNU |
| AVG_entorhinal_thickavg       | ICC3 | 0.609 | 16.57  | 26 | 234 | 1.35E-39  | 0.4933  | 0.7334 | v6.0          | HNU |
| AVG_entorhinal_thickavg       | ICC2 | 0.468 | 9.01   | 26 | 26  | 1.61E-07  | -0.0612 | 0.7626 | v6.0 vs. v7.1 | HNU |
| AVG_entorhinal_thickavg       | ICC3 | 0.629 | 17.92  | 26 | 234 | 4.38E-42  | 0.5149  | 0.7490 | v7.1          | HNU |
| AVG_frontalpole_thickavg      | ICC3 | 0.781 | 36.66  | 26 | 234 | 5.79E-68  | 0.6947  | 0.8613 | v5.3          | HNU |
| AVG_frontalpole_thickavg      | ICC2 | 0.696 | 5.46   | 26 | 26  | 2.39E-05  | 0.4855  | 0.8297 | v5.3 vs. v6.0 | HNU |
| AVG_frontalpole_thickavg      | ICC2 | 0.732 | 6.50   | 26 | 26  | 4.54E-06  | 0.5440  | 0.8511 | v5.3 vs. v7.1 | HNU |
| AVG_frontalpole_thickavg      | ICC3 | 0.830 | 49.91  | 26 | 234 | 1.25E-80  | 0.7581  | 0.8946 | v6.0          | HNU |
| AVG_frontalpole_thickavg      | ICC2 | 0.882 | 15.54  | 26 | 26  | 3.75E-10  | 0.7842  | 0.9367 | v6.0 vs. v7.1 | HNU |
| AVG_frontalpole_thickavg      | ICC3 | 0.839 | 53.08  | 26 | 234 | 3.00E-83  | 0.7696  | 0.9004 | v7.1          | HNU |
| AVG_fusiform_thickavg         | ICC3 | 0.604 | 16.25  | 26 | 234 | 5.29E-39  | 0.4880  | 0.7295 | v5.3          | HNU |
| AVG_fusiform_thickavg         | ICC2 | 0.672 | 8.63   | 26 | 26  | 2.52E-07  | 0.2045  | 0.8504 | v5.3 vs. v6.0 | HNU |
| AVG_fusiform_thickavg         | ICC2 | 0.775 | 7.66   | 26 | 26  | 8.75E-07  | 0.6063  | 0.8771 | v5.3 vs. v7.1 | HNU |
| AVG_fusiform_thickavg         | ICC3 | 0.726 | 27.56  | 26 | 234 | 5.47E-57  | 0.6277  | 0.8228 | v6.0          | HNU |
| AVG_fusiform_thickavg         | ICC2 | 0.745 | 19.51  | 26 | 26  | 2.63E-11  | 0.0505  | 0.9074 | v6.0 vs. v7.1 | HNU |
| AVG_fusiform_thickavg         | ICC3 | 0.750 | 31.02  | 26 | 234 | 1.91E-61  | 0.6564  | 0.8397 | v7.1          | HNU |
| AVG_Hippocampus               | ICC3 | 0.767 | 33.88  | 26 | 234 | 7.50E-65  | 0.6770  | 0.8514 | v5.3          | HNU |
| AVG_Hippocampus               | ICC2 | 0.814 | 13.01  | 26 | 26  | 2.86E-09  | 0.5877  | 0.9098 | v5.3 vs. v6.0 | HNU |
| AVG_Hippocampus               | ICC2 | 0.748 | 18.40  | 26 | 26  | 5.24E-11  | 0.0754  | 0.9070 | v5.3 vs. v7.1 | HNU |
| AVG_Hippocampus               | ICC3 | 0.899 | 90.13  | 26 | 234 | 1.04E-106 | 0.8516  | 0.9391 | v6.0          | HNU |
| AVG_Hippocampus               | ICC2 | 0.896 | 34.85  | 26 | 26  | 2.35E-14  | 0.5589  | 0.9604 | v6.0 vs. v7.1 | HNU |
| AVG_Hippocampus               | ICC3 | 0.920 | 116.33 | 26 | 234 | 1.61E-118 | 0.8815  | 0.9522 | v7.1          | HNU |
| AVG_inferiorparietal_thickavg | ICC3 | 0.812 | 44.13  | 26 | 234 | 1.73E-75  | 0.7340  | 0.8823 | v5.3          | HNU |
| AVG_inferiorparietal_thickavg | ICC2 | 0.676 | 16.30  | 26 | 26  | 2.16E-10  | -0.0117 | 0.8792 | v5.3 vs. v6.0 | HNU |
| AVG_inferiorparietal_thickavg | ICC2 | 0.816 | 12.10  | 26 | 26  | 6.42E-09  | 0.6309  | 0.9063 | v5.3 vs. v7.1 | HNU |
| AVG_inferiorparietal_thickavg | ICC3 | 0.836 | 52.04  | 26 | 234 | 2.12E-82  | 0.7659  | 0.8985 | v6.0          | HNU |
| AVG_inferiorparietal_thickavg | ICC2 | 0.789 | 20.14  | 26 | 26  | 1.81E-11  | 0.1729  | 0.9216 | v6.0 vs. v7.1 | HNU |
| AVG_inferiorparietal_thickavg | ICC3 | 0.809 | 43.36  | 26 | 234 | 9.19E-75  | 0.7305  | 0.8804 | v7.1          | HNU |
| AVG_inferiortemporal_thickavg | ICC3 | 0.629 | 17.98  | 26 | 234 | 3.47E-42  | 0.5158  | 0.7496 | v5.3          | HNU |
| AVG_inferiortemporal_thickavg | ICC2 | 0.679 | 8.02   | 26 | 26  | 5.45E-07  | 0.2777  | 0.8470 | v5.3 vs. v6.0 | HNU |
| AVG_inferiortemporal_thickavg | ICC2 | 0.753 | 7.53   | 26 | 26  | 1.04E-06  | 0.5721  | 0.8635 | v5.3 vs. v7.1 | HNU |
| AVG_inferiortemporal_thickavg | ICC3 | 0.729 | 27.91  | 26 | 234 | 1.84E-57  | 0.6308  | 0.8247 | v6.0          | HNU |
| AVG_inferiortemporal_thickavg | ICC2 | 0.654 | 17.63  | 26 | 26  | 8.65E-11  | -0.0325 | 0.8722 | v6.0 vs. v7.1 | HNU |
| AVG_inferiortemporal_thickavg | ICC3 | 0.698 | 24.06  | 26 | 234 | 4.58E-52  | 0.5934  | 0.8016 | v7.1          | HNU |
| AVG_insula_thickavg           | ICC3 | 0.596 | 15.76  | 26 | 234 | 4.55E-38  | 0.4796  | 0.7232 | v5.3          | HNU |
| AVG_insula_thickavg           | ICC2 | 0.662 | 4.79   | 26 | 26  | 7.94E-05  | 0.4344  | 0.8100 | v5.3 vs. v6.0 | HNU |
| AVG_insula_thickavg           | ICC2 | 0.766 | 8.69   | 26 | 26  | 2.33E-07  | 0.5707  | 0.8746 | v5.3 vs. v7.1 | HNU |
| AVG_insula_thickavg           | ICC3 | 0.556 | 13.50  | 26 | 234 | 1.68E-33  | 0.4366  | 0.6898 | v6.0          | HNU |
| AVG_insula_thickavg           | ICC2 | 0.698 | 6.58   | 26 | 26  | 4.02E-06  | 0.4639  | 0.8358 | v6.0 vs. v7.1 | HNU |
| AVG_insula_thickavg           | ICC3 | 0.703 | 24.63  | 26 | 234 | 6.81E-53  | 0.5994  | 0.8054 | v7.1          | HNU |
| AVG_isthmuscingulate_thickavg | ICC3 | 0.846 | 55.79  | 26 | 234 | 2.23E-85  | 0.7785  | 0.9048 | v5.3          | HNU |

|                                   |      |       |          |    |     |           |         |        |               |     |
|-----------------------------------|------|-------|----------|----|-----|-----------|---------|--------|---------------|-----|
| AVG_isthmuscingulate_thickavg     | ICC2 | 0.733 | 7.72     | 26 | 26  | 8.08E-07  | 0.5098  | 0.8577 | v5.3 vs. v6.0 | HNU |
| AVG_isthmuscingulate_thickavg     | ICC2 | 0.521 | 6.17     | 26 | 26  | 7.52E-06  | 0.0063  | 0.7717 | v5.3 vs. v7.1 | HNU |
| AVG_isthmuscingulate_thickavg     | ICC3 | 0.900 | 90.81    | 26 | 234 | 4.69E-107 | 0.8526  | 0.9395 | v6.0          | HNU |
| AVG_isthmuscingulate_thickavg     | ICC2 | 0.816 | 26.40    | 26 | 26  | 7.00E-13  | 0.1576  | 0.9352 | v6.0 vs. v7.1 | HNU |
| AVG_isthmuscingulate_thickavg     | ICC3 | 0.894 | 85.19    | 26 | 234 | 3.84E-104 | 0.8443  | 0.9357 | v7.1          | HNU |
| AVG_lateraloccipital_thickavg     | ICC3 | 0.790 | 38.54    | 26 | 234 | 5.76E-70  | 0.7057  | 0.8673 | v5.3          | HNU |
| AVG_lateraloccipital_thickavg     | ICC2 | 0.559 | 10.18    | 26 | 26  | 4.34E-08  | -0.0439 | 0.8157 | v5.3 vs. v6.0 | HNU |
| AVG_lateraloccipital_thickavg     | ICC2 | 0.731 | 9.63     | 26 | 26  | 7.86E-08  | 0.3698  | 0.8734 | v5.3 vs. v7.1 | HNU |
| AVG_lateraloccipital_thickavg     | ICC3 | 0.863 | 63.90    | 26 | 234 | 2.77E-91  | 0.8016  | 0.9160 | v6.0          | HNU |
| AVG_lateraloccipital_thickavg     | ICC2 | 0.827 | 22.74    | 26 | 26  | 4.25E-12  | 0.2973  | 0.9349 | v6.0 vs. v7.1 | HNU |
| AVG_lateraloccipital_thickavg     | ICC3 | 0.867 | 66.24    | 26 | 234 | 7.24E-93  | 0.8074  | 0.9187 | v7.1          | HNU |
| AVG_lateralorbitofrontal_thickavg | ICC3 | 0.584 | 15.02    | 26 | 234 | 1.28E-36  | 0.4663  | 0.7131 | v5.3          | HNU |
| AVG_lateralorbitofrontal_thickavg | ICC2 | 0.608 | 10.29    | 26 | 26  | 3.84E-08  | -0.0096 | 0.8373 | v5.3 vs. v6.0 | HNU |
| AVG_lateralorbitofrontal_thickavg | ICC2 | 0.795 | 9.37     | 26 | 26  | 1.06E-07  | 0.6378  | 0.8885 | v5.3 vs. v7.1 | HNU |
| AVG_lateralorbitofrontal_thickavg | ICC3 | 0.689 | 23.11    | 26 | 234 | 1.24E-50  | 0.5829  | 0.7950 | v6.0          | HNU |
| AVG_lateralorbitofrontal_thickavg | ICC2 | 0.661 | 11.18    | 26 | 26  | 1.55E-08  | 0.0493  | 0.8611 | v6.0 vs. v7.1 | HNU |
| AVG_lateralorbitofrontal_thickavg | ICC3 | 0.562 | 13.84    | 26 | 234 | 3.34E-34  | 0.4434  | 0.6952 | v7.1          | HNU |
| AVG_LateralVentricle              | ICC3 | 0.997 | 3854.51  | 26 | 234 | 2.37E-292 | 0.9960  | 0.9985 | v5.3          | HNU |
| AVG_LateralVentricle              | ICC2 | 0.992 | 2566.73  | 26 | 26  | 2.45E-38  | 0.5259  | 0.9979 | v5.3 vs. v6.0 | HNU |
| AVG_LateralVentricle              | ICC2 | 0.991 | 3348.68  | 26 | 26  | 7.75E-40  | 0.4264  | 0.9977 | v5.3 vs. v7.1 | HNU |
| AVG_LateralVentricle              | ICC3 | 0.998 | 5114.53  | 26 | 234 | 1.08E-306 | 0.9970  | 0.9989 | v6.0          | HNU |
| AVG_LateralVentricle              | ICC2 | 1.000 | 1.34E+04 | 26 | 26  | 1.21E-47  | 0.9995  | 0.9999 | v6.0 vs. v7.1 | HNU |
| AVG_LateralVentricle              | ICC3 | 0.998 | 5209.19  | 26 | 234 | 1.27E-307 | 0.9970  | 0.9989 | v7.1          | HNU |
| AVG_lingual_thickavg              | ICC3 | 0.789 | 38.46    | 26 | 234 | 7.12E-70  | 0.7052  | 0.8670 | v5.3          | HNU |
| AVG_lingual_thickavg              | ICC2 | 0.697 | 12.47    | 26 | 26  | 4.61E-09  | 0.0894  | 0.8778 | v5.3 vs. v6.0 | HNU |
| AVG_lingual_thickavg              | ICC2 | 0.864 | 13.22    | 26 | 26  | 2.38E-09  | 0.7524  | 0.9271 | v5.3 vs. v7.1 | HNU |
| AVG_lingual_thickavg              | ICC3 | 0.824 | 47.96    | 26 | 234 | 5.93E-79  | 0.7505  | 0.8908 | v6.0          | HNU |
| AVG_lingual_thickavg              | ICC2 | 0.740 | 19.32    | 26 | 26  | 2.94E-11  | 0.0437  | 0.9056 | v6.0 vs. v7.1 | HNU |
| AVG_lingual_thickavg              | ICC3 | 0.851 | 58.12    | 26 | 234 | 3.79E-87  | 0.7857  | 0.9083 | v7.1          | HNU |
| AVG_medialorbitofrontal_thickavg  | ICC3 | 0.549 | 13.19    | 26 | 234 | 7.83E-33  | 0.4300  | 0.6845 | v5.3          | HNU |
| AVG_medialorbitofrontal_thickavg  | ICC2 | 0.552 | 7.45     | 26 | 26  | 1.16E-06  | -0.0043 | 0.7976 | v5.3 vs. v6.0 | HNU |
| AVG_medialorbitofrontal_thickavg  | ICC2 | 0.683 | 5.24     | 26 | 26  | 3.50E-05  | 0.4684  | 0.8220 | v5.3 vs. v7.1 | HNU |
| AVG_medialorbitofrontal_thickavg  | ICC3 | 0.642 | 18.97    | 26 | 234 | 6.40E-44  | 0.5303  | 0.7599 | v6.0          | HNU |
| AVG_medialorbitofrontal_thickavg  | ICC2 | 0.572 | 7.85     | 26 | 26  | 6.77E-07  | 0.0089  | 0.8094 | v6.0 vs. v7.1 | HNU |
| AVG_medialorbitofrontal_thickavg  | ICC3 | 0.589 | 15.31    | 26 | 234 | 3.52E-37  | 0.4715  | 0.7171 | v7.1          | HNU |
| AVG_middletemporal_thickavg       | ICC3 | 0.772 | 34.83    | 26 | 234 | 6.17E-66  | 0.6833  | 0.8550 | v5.3          | HNU |
| AVG_middletemporal_thickavg       | ICC2 | 0.832 | 17.49    | 26 | 26  | 9.49E-11  | 0.5070  | 0.9274 | v5.3 vs. v6.0 | HNU |
| AVG_middletemporal_thickavg       | ICC2 | 0.856 | 15.45    | 26 | 26  | 4.00E-10  | 0.7109  | 0.9267 | v5.3 vs. v7.1 | HNU |
| AVG_middletemporal_thickavg       | ICC3 | 0.885 | 78.26    | 26 | 234 | 2.66E-100 | 0.8325  | 0.9304 | v6.0          | HNU |
| AVG_middletemporal_thickavg       | ICC2 | 0.721 | 24.79    | 26 | 26  | 1.50E-12  | -0.0147 | 0.9039 | v6.0 vs. v7.1 | HNU |
| AVG_middletemporal_thickavg       | ICC3 | 0.859 | 61.68    | 26 | 234 | 9.89E-90  | 0.7958  | 0.9132 | v7.1          | HNU |
| AVG_Pallidum                      | ICC3 | 0.855 | 59.78    | 26 | 234 | 2.29E-88  | 0.7905  | 0.9106 | v5.3          | HNU |
| AVG_Pallidum                      | ICC2 | 0.603 | 4.95     | 26 | 26  | 5.86E-05  | 0.3115  | 0.7809 | v5.3 vs. v6.0 | HNU |
| AVG_Pallidum                      | ICC2 | 0.460 | 3.81     | 26 | 26  | 5.45E-04  | 0.0844  | 0.6988 | v5.3 vs. v7.1 | HNU |

|                               |      |       |       |    |     |           |         |        |               |     |
|-------------------------------|------|-------|-------|----|-----|-----------|---------|--------|---------------|-----|
| AVG Pallidum                  | ICC3 | 0.903 | 94.41 | 26 | 234 | 7.74E-109 | 0.8575  | 0.9417 | v6.0          | HNU |
| AVG_Pallidum                  | ICC2 | 0.915 | 54.24 | 26 | 26  | 9.51E-17  | 0.4743  | 0.9710 | v6.0 vs. v7.1 | HNU |
| AVG_Pallidum                  | ICC3 | 0.889 | 81.01 | 26 | 234 | 7.35E-102 | 0.8374  | 0.9326 | v7.1          | HNU |
| AVG_paracentral_thickavg      | ICC3 | 0.790 | 38.66 | 26 | 234 | 4.38E-70  | 0.7063  | 0.8676 | v5.3          | HNU |
| AVG_paracentral_thickavg      | ICC2 | 0.522 | 21.81 | 26 | 26  | 6.97E-12  | -0.0358 | 0.8122 | v5.3 vs. v6.0 | HNU |
| AVG_paracentral_thickavg      | ICC2 | 0.534 | 17.45 | 26 | 26  | 9.73E-11  | -0.0445 | 0.8158 | v5.3 vs. v7.1 | HNU |
| AVG_paracentral_thickavg      | ICC3 | 0.797 | 40.18 | 26 | 234 | 1.20E-71  | 0.7146  | 0.8721 | v6.0          | HNU |
| AVG_paracentral_thickavg      | ICC2 | 0.866 | 13.44 | 26 | 26  | 1.97E-09  | 0.7557  | 0.9280 | v6.0 vs. v7.1 | HNU |
| AVG_paracentral_thickavg      | ICC3 | 0.793 | 39.35 | 26 | 234 | 8.44E-71  | 0.7102  | 0.8697 | v7.1          | HNU |
| AVG parahippocampal_thickavg  | ICC3 | 0.883 | 76.59 | 26 | 234 | 2.50E-99  | 0.8294  | 0.9290 | v5.3          | HNU |
| AVG parahippocampal_thickavg  | ICC2 | 0.876 | 50.75 | 26 | 26  | 2.19E-16  | 0.1711  | 0.9604 | v5.3 vs. v6.0 | HNU |
| AVG parahippocampal_thickavg  | ICC2 | 0.930 | 31.42 | 26 | 26  | 8.39E-14  | 0.8615  | 0.9643 | v5.3 vs. v7.1 | HNU |
| AVG parahippocampal_thickavg  | ICC3 | 0.906 | 96.95 | 26 | 234 | 4.67E-110 | 0.8608  | 0.9431 | v6.0          | HNU |
| AVG parahippocampal_thickavg  | ICC2 | 0.790 | 43.36 | 26 | 26  | 1.57E-15  | 0.0019  | 0.9338 | v6.0 vs. v7.1 | HNU |
| AVG parahippocampal_thickavg  | ICC3 | 0.906 | 97.27 | 26 | 234 | 3.29E-110 | 0.8612  | 0.9433 | v7.1          | HNU |
| AVG_parsopercularis_thickavg  | ICC3 | 0.820 | 46.70 | 26 | 234 | 7.69E-78  | 0.7453  | 0.8881 | v5.3          | HNU |
| AVG_parsopercularis_thickavg  | ICC2 | 0.643 | 18.26 | 26 | 26  | 5.73E-11  | -0.0374 | 0.8684 | v5.3 vs. v6.0 | HNU |
| AVG_parsopercularis_thickavg  | ICC2 | 0.739 | 23.85 | 26 | 26  | 2.39E-12  | 0.0041  | 0.9096 | v5.3 vs. v7.1 | HNU |
| AVG_parsopercularis_thickavg  | ICC3 | 0.880 | 74.19 | 26 | 234 | 6.69E-98  | 0.8248  | 0.9268 | v6.0          | HNU |
| AVG_parsopercularis_thickavg  | ICC2 | 0.887 | 19.80 | 26 | 26  | 2.20E-11  | 0.7686  | 0.9426 | v6.0 vs. v7.1 | HNU |
| AVG_parsopercularis_thickavg  | ICC3 | 0.842 | 54.12 | 26 | 234 | 4.45E-84  | 0.7731  | 0.9021 | v7.1          | HNU |
| AVG_parsorbitalis_thickavg    | ICC3 | 0.834 | 51.29 | 26 | 234 | 8.75E-82  | 0.7632  | 0.8972 | v5.3          | HNU |
| AVG_parsorbitalis_thickavg    | ICC2 | 0.628 | 12.95 | 26 | 26  | 3.00E-09  | -0.0251 | 0.8537 | v5.3 vs. v6.0 | HNU |
| AVG_parsorbitalis_thickavg    | ICC2 | 0.626 | 6.20  | 26 | 26  | 7.10E-06  | 0.2528  | 0.8101 | v5.3 vs. v7.1 | HNU |
| AVG_parsorbitalis_thickavg    | ICC3 | 0.809 | 43.38 | 26 | 234 | 8.84E-75  | 0.7306  | 0.8805 | v6.0          | HNU |
| AVG_parsorbitalis_thickavg    | ICC2 | 0.780 | 10.87 | 26 | 26  | 2.11E-08  | 0.5193  | 0.8922 | v6.0 vs. v7.1 | HNU |
| AVG_parsorbitalis_thickavg    | ICC3 | 0.784 | 37.24 | 26 | 234 | 1.39E-68  | 0.6982  | 0.8632 | v7.1          | HNU |
| AVG_parstriangularis_thickavg | ICC3 | 0.832 | 50.41 | 26 | 234 | 4.74E-81  | 0.7600  | 0.8956 | v5.3          | HNU |
| AVG_parstriangularis_thickavg | ICC2 | 0.522 | 13.12 | 26 | 26  | 2.60E-09  | -0.0529 | 0.8039 | v5.3 vs. v6.0 | HNU |
| AVG_parstriangularis_thickavg | ICC2 | 0.661 | 14.58 | 26 | 26  | 7.83E-10  | -0.0113 | 0.8705 | v5.3 vs. v7.1 | HNU |
| AVG_parstriangularis_thickavg | ICC3 | 0.859 | 61.80 | 26 | 234 | 8.03E-90  | 0.7961  | 0.9133 | v6.0          | HNU |
| AVG_parstriangularis_thickavg | ICC2 | 0.865 | 20.20 | 26 | 26  | 1.74E-11  | 0.6364  | 0.9393 | v6.0 vs. v7.1 | HNU |
| AVG_parstriangularis_thickavg | ICC3 | 0.829 | 49.33 | 26 | 234 | 3.90E-80  | 0.7559  | 0.8935 | v7.1          | HNU |
| AVG_pericalcarine_thickavg    | ICC3 | 0.775 | 35.54 | 26 | 234 | 9.92E-67  | 0.6878  | 0.8575 | v5.3          | HNU |
| AVG_pericalcarine_thickavg    | ICC2 | 0.693 | 13.05 | 26 | 26  | 2.77E-09  | 0.0641  | 0.8784 | v5.3 vs. v6.0 | HNU |
| AVG_pericalcarine_thickavg    | ICC2 | 0.733 | 8.73  | 26 | 26  | 2.25E-07  | 0.4426  | 0.8667 | v5.3 vs. v7.1 | HNU |
| AVG_pericalcarine_thickavg    | ICC3 | 0.826 | 48.44 | 26 | 234 | 2.28E-79  | 0.7524  | 0.8917 | v6.0          | HNU |
| AVG_pericalcarine_thickavg    | ICC2 | 0.878 | 20.51 | 26 | 26  | 1.45E-11  | 0.7107  | 0.9422 | v6.0 vs. v7.1 | HNU |
| AVG_pericalcarine_thickavg    | ICC3 | 0.872 | 69.33 | 26 | 234 | 7.01E-95  | 0.8146  | 0.9221 | v7.1          | HNU |
| AVG_postcentral_thickavg      | ICC3 | 0.889 | 80.76 | 26 | 234 | 1.01E-101 | 0.8370  | 0.9324 | v5.3          | HNU |
| AVG_postcentral_thickavg      | ICC2 | 0.508 | 27.17 | 26 | 26  | 4.95E-13  | -0.0275 | 0.8059 | v5.3 vs. v6.0 | HNU |
| AVG_postcentral_thickavg      | ICC2 | 0.510 | 40.86 | 26 | 26  | 3.27E-15  | -0.0175 | 0.8100 | v5.3 vs. v7.1 | HNU |
| AVG_postcentral_thickavg      | ICC3 | 0.898 | 89.03 | 26 | 234 | 3.78E-106 | 0.8501  | 0.9384 | v6.0          | HNU |
| AVG_postcentral_thickavg      | ICC2 | 0.955 | 42.65 | 26 | 26  | 1.92E-15  | 0.9153  | 0.9763 | v6.0 vs. v7.1 | HNU |

|                                       |      |       |        |    |     |           |         |        |               |     |
|---------------------------------------|------|-------|--------|----|-----|-----------|---------|--------|---------------|-----|
| AVG_postcentral_thickavg              | ICC3 | 0.862 | 63.54  | 26 | 234 | 4.93E-91  | 0.8007  | 0.9155 | v7.1          | HNU |
| AVG_posteriorcingulate_thickavg       | ICC3 | 0.748 | 30.74  | 26 | 234 | 4.22E-61  | 0.6543  | 0.8385 | v5.3          | HNU |
| AVG_posteriorcingulate_thickavg       | ICC2 | 0.791 | 9.64   | 26 | 26  | 7.80E-08  | 0.6212  | 0.8881 | v5.3 vs. v6.0 | HNU |
| AVG_posteriorcingulate_thickavg       | ICC2 | 0.619 | 8.01   | 26 | 26  | 5.51E-07  | 0.0887  | 0.8284 | v5.3 vs. v7.1 | HNU |
| AVG_posteriorcingulate_thickavg       | ICC3 | 0.816 | 45.39  | 26 | 234 | 1.20E-76  | 0.7397  | 0.8852 | v6.0          | HNU |
| AVG_posteriorcingulate_thickavg       | ICC2 | 0.528 | 12.32  | 26 | 26  | 5.25E-09  | -0.0542 | 0.8054 | v6.0 vs. v7.1 | HNU |
| AVG_posteriorcingulate_thickavg       | ICC3 | 0.784 | 37.39  | 26 | 234 | 9.46E-69  | 0.6991  | 0.8637 | v7.1          | HNU |
| AVG_precentral_thickavg               | ICC3 | 0.833 | 51.03  | 26 | 234 | 1.44E-81  | 0.7623  | 0.8967 | v5.3          | HNU |
| AVG_precentral_thickavg               | ICC2 | 0.514 | 22.33  | 26 | 26  | 5.27E-12  | -0.0342 | 0.8077 | v5.3 vs. v6.0 | HNU |
| AVG_precentral_thickavg               | ICC2 | 0.455 | 16.35  | 26 | 26  | 2.09E-10  | -0.0397 | 0.7675 | v5.3 vs. v7.1 | HNU |
| AVG_precentral_thickavg               | ICC3 | 0.837 | 52.32  | 26 | 234 | 1.24E-82  | 0.7669  | 0.8990 | v6.0          | HNU |
| AVG_precentral_thickavg               | ICC2 | 0.898 | 20.16  | 26 | 26  | 1.79E-11  | 0.8102  | 0.9464 | v6.0 vs. v7.1 | HNU |
| AVG_precentral_thickavg               | ICC3 | 0.817 | 45.60  | 26 | 234 | 7.62E-77  | 0.7406  | 0.8857 | v7.1          | HNU |
| AVG_precuneus_thickavg                | ICC3 | 0.817 | 45.51  | 26 | 234 | 9.21E-77  | 0.7402  | 0.8855 | v5.3          | HNU |
| AVG_precuneus_thickavg                | ICC2 | 0.572 | 14.43  | 26 | 26  | 8.81E-10  | -0.0492 | 0.8316 | v5.3 vs. v6.0 | HNU |
| AVG_precuneus_thickavg                | ICC2 | 0.760 | 21.59  | 26 | 26  | 7.87E-12  | 0.0559  | 0.9145 | v5.3 vs. v7.1 | HNU |
| AVG_precuneus_thickavg                | ICC3 | 0.856 | 60.27  | 26 | 234 | 1.01E-88  | 0.7919  | 0.9113 | v6.0          | HNU |
| AVG_precuneus_thickavg                | ICC2 | 0.818 | 18.79  | 26 | 26  | 4.10E-11  | 0.3723  | 0.9272 | v6.0 vs. v7.1 | HNU |
| AVG_precuneus_thickavg                | ICC3 | 0.850 | 57.65  | 26 | 234 | 8.52E-87  | 0.7843  | 0.9076 | v7.1          | HNU |
| AVG_Putamen                           | ICC3 | 0.937 | 149.90 | 26 | 234 | 1.71E-130 | 0.9058  | 0.9625 | v5.3          | HNU |
| AVG_Putamen                           | ICC2 | 0.329 | 28.26  | 26 | 26  | 3.06E-13  | -0.0141 | 0.6699 | v5.3 vs. v6.0 | HNU |
| AVG_Putamen                           | ICC2 | 0.352 | 24.94  | 26 | 26  | 1.39E-12  | -0.0179 | 0.6911 | v5.3 vs. v7.1 | HNU |
| AVG_Putamen                           | ICC3 | 0.944 | 170.04 | 26 | 234 | 1.59E-136 | 0.9161  | 0.9668 | v6.0          | HNU |
| AVG_Putamen                           | ICC2 | 0.979 | 156.40 | 26 | 26  | 1.33E-22  | 0.9187  | 0.9917 | v6.0 vs. v7.1 | HNU |
| AVG_Putamen                           | ICC3 | 0.979 | 462.60 | 26 | 234 | 1.43E-185 | 0.9676  | 0.9876 | v7.1          | HNU |
| AVG_rostralanteriorcingulate_thickavg | ICC3 | 0.527 | 12.13  | 26 | 234 | 1.59E-30  | 0.4068  | 0.6652 | v5.3          | HNU |
| AVG_rostralanteriorcingulate_thickavg | ICC2 | 0.698 | 9.36   | 26 | 26  | 1.07E-07  | 0.2490  | 0.8631 | v5.3 vs. v6.0 | HNU |
| AVG_rostralanteriorcingulate_thickavg | ICC2 | 0.734 | 7.42   | 26 | 26  | 1.20E-06  | 0.5253  | 0.8553 | v5.3 vs. v7.1 | HNU |
| AVG_rostralanteriorcingulate_thickavg | ICC3 | 0.647 | 19.33  | 26 | 234 | 1.53E-44  | 0.5354  | 0.7634 | v6.0          | HNU |
| AVG_rostralanteriorcingulate_thickavg | ICC2 | 0.679 | 63.00  | 26 | 26  | 1.44E-17  | -0.0151 | 0.8955 | v6.0 vs. v7.1 | HNU |
| AVG_rostralanteriorcingulate_thickavg | ICC3 | 0.629 | 17.95  | 26 | 234 | 3.87E-42  | 0.5154  | 0.7494 | v7.1          | HNU |
| AVG_rostralmiddlefrontal_thickavg     | ICC3 | 0.810 | 43.77  | 26 | 234 | 3.83E-75  | 0.7324  | 0.8814 | v5.3          | HNU |
| AVG_rostralmiddlefrontal_thickavg     | ICC2 | 0.569 | 12.21  | 26 | 26  | 5.82E-09  | -0.0487 | 0.8260 | v5.3 vs. v6.0 | HNU |
| AVG_rostralmiddlefrontal_thickavg     | ICC2 | 0.606 | 8.67   | 26 | 26  | 2.39E-07  | 0.0314  | 0.8284 | v5.3 vs. v7.1 | HNU |
| AVG_rostralmiddlefrontal_thickavg     | ICC3 | 0.832 | 50.41  | 26 | 234 | 4.70E-81  | 0.7600  | 0.8956 | v6.0          | HNU |
| AVG_rostralmiddlefrontal_thickavg     | ICC2 | 0.827 | 13.09  | 26 | 26  | 2.66E-09  | 0.6429  | 0.9126 | v6.0 vs. v7.1 | HNU |
| AVG_rostralmiddlefrontal_thickavg     | ICC3 | 0.793 | 39.26  | 26 | 234 | 1.04E-70  | 0.7097  | 0.8694 | v7.1          | HNU |
| AVG_superiorfrontal_thickavg          | ICC3 | 0.866 | 65.38  | 26 | 234 | 2.73E-92  | 0.8053  | 0.9177 | v5.3          | HNU |
| AVG_superiorfrontal_thickavg          | ICC2 | 0.673 | 16.68  | 26 | 26  | 1.65E-10  | -0.0176 | 0.8783 | v5.3 vs. v6.0 | HNU |
| AVG_superiorfrontal_thickavg          | ICC2 | 0.771 | 13.87  | 26 | 26  | 1.39E-09  | 0.3145  | 0.9038 | v5.3 vs. v7.1 | HNU |
| AVG_superiorfrontal_thickavg          | ICC3 | 0.894 | 85.03  | 26 | 234 | 4.69E-104 | 0.8440  | 0.9356 | v6.0          | HNU |
| AVG_superiorfrontal_thickavg          | ICC2 | 0.865 | 22.92  | 26 | 26  | 3.86E-12  | 0.5596  | 0.9436 | v6.0 vs. v7.1 | HNU |
| AVG_superiorfrontal_thickavg          | ICC3 | 0.851 | 58.32  | 26 | 234 | 2.71E-87  | 0.7863  | 0.9086 | v7.1          | HNU |
| AVG_superiorparietal_thickavg         | ICC3 | 0.862 | 63.24  | 26 | 234 | 7.99E-91  | 0.7999  | 0.9151 | v5.3          | HNU |



|                                 |      |       |          |    |     |           |         |        |               |     |
|---------------------------------|------|-------|----------|----|-----|-----------|---------|--------|---------------|-----|
| AVG_superiorparietal_thickavg   | ICC2 | 0.561 | 19.42    | 26 | 26  | 2.78E-11  | -0.0424 | 0.8314 | v5.3 vs. v6.0 | HNU |
| AVG_superiorparietal_thickavg   | ICC2 | 0.547 | 20.37    | 26 | 26  | 1.57E-11  | -0.0400 | 0.8251 | v5.3 vs. v7.1 | HNU |
| AVG_superiorparietal_thickavg   | ICC3 | 0.853 | 58.90    | 26 | 234 | 9.94E-88  | 0.7880  | 0.9094 | v6.0          | HNU |
| AVG_superiorparietal_thickavg   | ICC2 | 0.906 | 19.68    | 26 | 26  | 2.37E-11  | 0.8269  | 0.9504 | v6.0 vs. v7.1 | HNU |
| AVG_superiorparietal_thickavg   | ICC3 | 0.810 | 43.69    | 26 | 234 | 4.48E-75  | 0.7320  | 0.8812 | v7.1          | HNU |
| AVG_superiortemporal_thickavg   | ICC3 | 0.813 | 44.38    | 26 | 234 | 1.02E-75  | 0.7352  | 0.8829 | v5.3          | HNU |
| AVG_superiortemporal_thickavg   | ICC2 | 0.646 | 16.15    | 26 | 26  | 2.40E-10  | -0.0320 | 0.8670 | v5.3 vs. v6.0 | HNU |
| AVG_superiortemporal_thickavg   | ICC2 | 0.806 | 15.30    | 26 | 26  | 4.49E-10  | 0.4395  | 0.9164 | v5.3 vs. v7.1 | HNU |
| AVG_superiortemporal_thickavg   | ICC3 | 0.852 | 58.59    | 26 | 234 | 1.68E-87  | 0.7871  | 0.9090 | v6.0          | HNU |
| AVG_superiortemporal_thickavg   | ICC2 | 0.824 | 24.65    | 26 | 26  | 1.61E-12  | 0.2346  | 0.9362 | v6.0 vs. v7.1 | HNU |
| AVG_superiortemporal_thickavg   | ICC3 | 0.818 | 45.80    | 26 | 234 | 5.02E-77  | 0.7415  | 0.8861 | v7.1          | HNU |
| AVG_supramarginal_thickavg      | ICC3 | 0.795 | 39.69    | 26 | 234 | 3.78E-71  | 0.7120  | 0.8707 | v5.3          | HNU |
| AVG_supramarginal_thickavg      | ICC2 | 0.676 | 16.42    | 26 | 26  | 1.98E-10  | -0.0126 | 0.8794 | v5.3 vs. v6.0 | HNU |
| AVG_supramarginal_thickavg      | ICC2 | 0.835 | 28.04    | 26 | 26  | 3.38E-13  | 0.2234  | 0.9417 | v5.3 vs. v7.1 | HNU |
| AVG_supramarginal_thickavg      | ICC3 | 0.849 | 57.23    | 26 | 234 | 1.76E-86  | 0.7830  | 0.9070 | v6.0          | HNU |
| AVG_supramarginal_thickavg      | ICC2 | 0.861 | 21.23    | 26 | 26  | 9.62E-12  | 0.5817  | 0.9405 | v6.0 vs. v7.1 | HNU |
| AVG_supramarginal_thickavg      | ICC3 | 0.820 | 46.70    | 26 | 234 | 7.81E-78  | 0.7453  | 0.8881 | v7.1          | HNU |
| AVG_temporalpole_thickavg       | ICC3 | 0.354 | 6.48     | 26 | 234 | 2.46E-16  | 0.2424  | 0.5037 | v5.3          | HNU |
| AVG_temporalpole_thickavg       | ICC2 | 0.794 | 10.10    | 26 | 26  | 4.72E-08  | 0.6141  | 0.8910 | v5.3 vs. v6.0 | HNU |
| AVG_temporalpole_thickavg       | ICC2 | 0.836 | 11.22    | 26 | 26  | 1.50E-08  | 0.7080  | 0.9111 | v5.3 vs. v7.1 | HNU |
| AVG_temporalpole_thickavg       | ICC3 | 0.365 | 6.75     | 26 | 234 | 4.29E-17  | 0.2522  | 0.5149 | v6.0          | HNU |
| AVG_temporalpole_thickavg       | ICC2 | 0.824 | 16.24    | 26 | 26  | 2.26E-10  | 0.5047  | 0.9226 | v6.0 vs. v7.1 | HNU |
| AVG_temporalpole_thickavg       | ICC3 | 0.374 | 6.96     | 26 | 234 | 1.09E-17  | 0.2599  | 0.5234 | v7.1          | HNU |
| AVG_Thalamus                    | ICC3 | 0.869 | 67.61    | 26 | 234 | 9.00E-94  | 0.8107  | 0.9202 | v5.3          | HNU |
| AVG_Thalamus                    | ICC2 | 0.898 | 60.56    | 26 | 26  | 2.38E-17  | 0.2422  | 0.9678 | v5.3 vs. v6.0 | HNU |
| AVG_Thalamus                    | ICC2 | 0.733 | 25.05    | 26 | 26  | 1.32E-12  | -0.0071 | 0.9081 | v5.3 vs. v7.1 | HNU |
| AVG_Thalamus                    | ICC3 | 0.938 | 151.60   | 26 | 234 | 4.94E-131 | 0.9068  | 0.9630 | v6.0          | HNU |
| AVG_Thalamus                    | ICC2 | 0.918 | 55.11    | 26 | 26  | 7.79E-17  | 0.4978  | 0.9718 | v6.0 vs. v7.1 | HNU |
| AVG_Thalamus                    | ICC3 | 0.922 | 119.40   | 26 | 234 | 9.71E-120 | 0.8842  | 0.9534 | v7.1          | HNU |
| AVG_Thickness                   | ICC3 | 0.816 | 45.28    | 26 | 234 | 1.48E-76  | 0.7392  | 0.8850 | v5.3          | HNU |
| AVG_Thickness                   | ICC2 | 0.494 | 12.63    | 26 | 26  | 3.99E-09  | -0.0531 | 0.7873 | v5.3 vs. v6.0 | HNU |
| AVG_Thickness                   | ICC2 | 0.700 | 12.71    | 26 | 26  | 3.71E-09  | 0.0893  | 0.8795 | v5.3 vs. v7.1 | HNU |
| AVG_Thickness                   | ICC3 | 0.877 | 72.29    | 26 | 234 | 9.64E-97  | 0.8209  | 0.9250 | v6.0          | HNU |
| AVG_Thickness                   | ICC2 | 0.744 | 15.92    | 26 | 26  | 2.83E-10  | 0.1202  | 0.9015 | v6.0 vs. v7.1 | HNU |
| AVG_Thickness                   | ICC3 | 0.826 | 48.60    | 26 | 234 | 1.66E-79  | 0.7530  | 0.8921 | v7.1          | HNU |
| AVG_transversetemporal_thickavg | ICC3 | 0.868 | 66.72    | 26 | 234 | 3.47E-93  | 0.8086  | 0.9192 | v5.3          | HNU |
| AVG_transversetemporal_thickavg | ICC2 | 0.708 | 38.79    | 26 | 26  | 6.25E-15  | -0.0243 | 0.9041 | v5.3 vs. v6.0 | HNU |
| AVG_transversetemporal_thickavg | ICC2 | 0.781 | 30.25    | 26 | 26  | 1.34E-13  | 0.0247  | 0.9268 | v5.3 vs. v7.1 | HNU |
| AVG_transversetemporal_thickavg | ICC3 | 0.878 | 72.70    | 26 | 234 | 5.35E-97  | 0.8218  | 0.9254 | v6.0          | HNU |
| AVG_transversetemporal_thickavg | ICC2 | 0.950 | 66.30    | 26 | 26  | 7.57E-18  | 0.8042  | 0.9803 | v6.0 vs. v7.1 | HNU |
| AVG_transversetemporal_thickavg | ICC3 | 0.866 | 65.82    | 26 | 234 | 1.39E-92  | 0.8064  | 0.9182 | v7.1          | HNU |
| ICV                             | ICC3 | 0.991 | 1059.85  | 26 | 234 | 4.34E-227 | 0.9856  | 0.9945 | v5.3          | HNU |
| ICV                             | ICC2 | 1.000 | 1.32E+07 | 26 | 26  | 1.39E-86  | 1.0000  | 1.0000 | v5.3 vs. v6.0 | HNU |
| ICV                             | ICC2 | 0.996 | 2739.14  | 26 | 26  | 1.05E-38  | 0.8083  | 0.9988 | v5.3 vs. v7.1 | HNU |

|                                     |      |       |         |    |     |           |         |        |               |     |
|-------------------------------------|------|-------|---------|----|-----|-----------|---------|--------|---------------|-----|
| ICV                                 | ICC3 | 0.991 | 1061.10 | 26 | 234 | 3.78E-227 | 0.9856  | 0.9946 | v6.0          | HNU |
| ICV                                 | ICC2 | 0.996 | 2737.88 | 26 | 26  | 1.06E-38  | 0.8074  | 0.9988 | v6.0 vs. v7.1 | HNU |
| ICV                                 | ICC3 | 0.988 | 831.81  | 26 | 234 | 6.59E-215 | 0.9818  | 0.9931 | v7.1          | HNU |
| LH_Accumbens                        | ICC3 | 0.602 | 16.14   | 26 | 234 | 8.61E-39  | 0.4861  | 0.7281 | v5.3          | HNU |
| LH_Accumbens                        | ICC2 | 0.517 | 4.29    | 26 | 26  | 2.04E-04  | 0.1534  | 0.7355 | v5.3 vs. v6.0 | HNU |
| LH_Accumbens                        | ICC2 | 0.590 | 6.66    | 26 | 26  | 3.53E-06  | 0.1060  | 0.8049 | v5.3 vs. v7.1 | HNU |
| LH_Accumbens                        | ICC3 | 0.745 | 30.15   | 26 | 234 | 2.33E-60  | 0.6496  | 0.8358 | v6.0          | HNU |
| LH_Accumbens                        | ICC2 | 0.920 | 24.30   | 26 | 26  | 1.91E-12  | 0.8529  | 0.9577 | v6.0 vs. v7.1 | HNU |
| LH_Accumbens                        | ICC3 | 0.762 | 33.09   | 26 | 234 | 6.18E-64  | 0.6715  | 0.8484 | v7.1          | HNU |
| LH_Amygdala                         | ICC3 | 0.788 | 38.22   | 26 | 234 | 1.27E-69  | 0.7038  | 0.8663 | v5.3          | HNU |
| LH_Amygdala                         | ICC2 | 0.825 | 10.61   | 26 | 26  | 2.74E-08  | 0.6908  | 0.9051 | v5.3 vs. v6.0 | HNU |
| LH_Amygdala                         | ICC2 | 0.761 | 7.15    | 26 | 26  | 1.75E-06  | 0.5838  | 0.8686 | v5.3 vs. v7.1 | HNU |
| LH_Amygdala                         | ICC3 | 0.806 | 42.49   | 26 | 234 | 6.35E-74  | 0.7263  | 0.8782 | v6.0          | HNU |
| LH_Amygdala                         | ICC2 | 0.894 | 18.07   | 26 | 26  | 6.47E-11  | 0.8073  | 0.9436 | v6.0 vs. v7.1 | HNU |
| LH_Amygdala                         | ICC3 | 0.788 | 38.28   | 26 | 234 | 1.09E-69  | 0.7042  | 0.8665 | v7.1          | HNU |
| LH_bankssts_surfavg                 | ICC3 | 0.887 | 79.62   | 26 | 234 | 4.46E-101 | 0.8350  | 0.9315 | v5.3          | HNU |
| LH_bankssts_surfavg                 | ICC2 | 0.774 | 8.08    | 26 | 26  | 5.02E-07  | 0.6088  | 0.8757 | v5.3 vs. v6.0 | HNU |
| LH_bankssts_surfavg                 | ICC2 | 0.744 | 7.11    | 26 | 26  | 1.86E-06  | 0.5619  | 0.8583 | v5.3 vs. v7.1 | HNU |
| LH_bankssts_surfavg                 | ICC3 | 0.951 | 196.79  | 26 | 234 | 1.45E-143 | 0.9268  | 0.9712 | v6.0          | HNU |
| LH_bankssts_surfavg                 | ICC2 | 0.943 | 33.06   | 26 | 26  | 4.50E-14  | 0.8931  | 0.9700 | v6.0 vs. v7.1 | HNU |
| LH_bankssts_surfavg                 | ICC3 | 0.955 | 211.50  | 26 | 234 | 4.67E-147 | 0.9315  | 0.9732 | v7.1          | HNU |
| LH_bankssts_thickavg                | ICC3 | 0.553 | 13.38   | 26 | 234 | 3.05E-33  | 0.4341  | 0.6877 | v5.3          | HNU |
| LH_bankssts_thickavg                | ICC2 | 0.642 | 7.58    | 26 | 26  | 9.64E-07  | 0.1829  | 0.8322 | v5.3 vs. v6.0 | HNU |
| LH_bankssts_thickavg                | ICC2 | 0.693 | 6.21    | 26 | 26  | 7.07E-06  | 0.4688  | 0.8301 | v5.3 vs. v7.1 | HNU |
| LH_bankssts_thickavg                | ICC3 | 0.744 | 30.03   | 26 | 234 | 3.31E-60  | 0.6486  | 0.8352 | v6.0          | HNU |
| LH_bankssts_thickavg                | ICC2 | 0.796 | 10.79   | 26 | 26  | 2.30E-08  | 0.5948  | 0.8951 | v6.0 vs. v7.1 | HNU |
| LH_bankssts_thickavg                | ICC3 | 0.741 | 29.57   | 26 | 234 | 1.27E-59  | 0.6449  | 0.8330 | v7.1          | HNU |
| LH_caudalanteriorcingulate_surfavg  | ICC3 | 0.976 | 414.70  | 26 | 234 | 3.87E-180 | 0.9640  | 0.9862 | v5.3          | HNU |
| LH_caudalanteriorcingulate_surfavg  | ICC2 | 0.895 | 25.10   | 26 | 26  | 1.29E-12  | 0.7272  | 0.9519 | v5.3 vs. v6.0 | HNU |
| LH_caudalanteriorcingulate_surfavg  | ICC2 | 0.922 | 25.21   | 26 | 26  | 1.23E-12  | 0.8548  | 0.9585 | v5.3 vs. v7.1 | HNU |
| LH_caudalanteriorcingulate_surfavg  | ICC3 | 0.987 | 747.02  | 26 | 234 | 1.63E-209 | 0.9797  | 0.9923 | v6.0          | HNU |
| LH_caudalanteriorcingulate_surfavg  | ICC2 | 0.971 | 109.94  | 26 | 26  | 1.22E-20  | 0.8949  | 0.9884 | v6.0 vs. v7.1 | HNU |
| LH_caudalanteriorcingulate_surfavg  | ICC3 | 0.990 | 974.96  | 26 | 234 | 6.89E-223 | 0.9844  | 0.9941 | v7.1          | HNU |
| LH_caudalanteriorcingulate_thickavg | ICC3 | 0.612 | 16.76   | 26 | 234 | 5.96E-40  | 0.4964  | 0.7357 | v5.3          | HNU |
| LH_caudalanteriorcingulate_thickavg | ICC2 | 0.554 | 7.15    | 26 | 26  | 1.75E-06  | 0.0095  | 0.7961 | v5.3 vs. v6.0 | HNU |
| LH_caudalanteriorcingulate_thickavg | ICC2 | 0.799 | 9.01    | 26 | 26  | 1.60E-07  | 0.6475  | 0.8898 | v5.3 vs. v7.1 | HNU |
| LH_caudalanteriorcingulate_thickavg | ICC3 | 0.691 | 23.40   | 26 | 234 | 4.52E-51  | 0.5861  | 0.7970 | v6.0          | HNU |
| LH_caudalanteriorcingulate_thickavg | ICC2 | 0.570 | 10.84   | 26 | 26  | 2.17E-08  | -0.0434 | 0.8228 | v6.0 vs. v7.1 | HNU |
| LH_caudalanteriorcingulate_thickavg | ICC3 | 0.746 | 30.30   | 26 | 234 | 1.49E-60  | 0.6508  | 0.8365 | v7.1          | HNU |
| LH_caudalmiddlefrontal_surfavg      | ICC3 | 0.973 | 355.62  | 26 | 234 | 1.58E-172 | 0.9582  | 0.9839 | v5.3          | HNU |
| LH_caudalmiddlefrontal_surfavg      | ICC2 | 0.730 | 7.50    | 26 | 26  | 1.07E-06  | 0.5108  | 0.8549 | v5.3 vs. v6.0 | HNU |
| LH_caudalmiddlefrontal_surfavg      | ICC2 | 0.830 | 12.09   | 26 | 26  | 6.51E-09  | 0.6834  | 0.9098 | v5.3 vs. v7.1 | HNU |
| LH_caudalmiddlefrontal_surfavg      | ICC3 | 0.971 | 336.56  | 26 | 234 | 8.32E-170 | 0.9560  | 0.9830 | v6.0          | HNU |
| LH_caudalmiddlefrontal_surfavg      | ICC2 | 0.964 | 65.04   | 26 | 26  | 9.66E-18  | 0.9218  | 0.9822 | v6.0 vs. v7.1 | HNU |

|                                 |      |       |        |    |     |           |         |        |               |     |
|---------------------------------|------|-------|--------|----|-----|-----------|---------|--------|---------------|-----|
| LH_caudalmiddlefrontal_surfavg  | ICC3 | 0.984 | 624.22 | 26 | 234 | 1.62E-200 | 0.9758  | 0.9908 | v7.1          | HNU |
| LH_caudalmiddlefrontal_thickavg | ICC3 | 0.795 | 39.89  | 26 | 234 | 2.36E-71  | 0.7131  | 0.8712 | v5.3          | HNU |
| LH_caudalmiddlefrontal_thickavg | ICC2 | 0.639 | 22.08  | 26 | 26  | 6.03E-12  | -0.0385 | 0.8697 | v5.3 vs. v6.0 | HNU |
| LH_caudalmiddlefrontal_thickavg | ICC2 | 0.743 | 16.39  | 26 | 26  | 2.02E-10  | 0.1040  | 0.9021 | v5.3 vs. v7.1 | HNU |
| LH_caudalmiddlefrontal_thickavg | ICC3 | 0.867 | 66.45  | 26 | 234 | 5.28E-93  | 0.8079  | 0.9189 | v6.0          | HNU |
| LH_caudalmiddlefrontal_thickavg | ICC2 | 0.888 | 23.53  | 26 | 26  | 2.82E-12  | 0.7151  | 0.9487 | v6.0 vs. v7.1 | HNU |
| LH_caudalmiddlefrontal_thickavg | ICC3 | 0.824 | 47.67  | 26 | 234 | 1.08E-78  | 0.7493  | 0.8902 | v7.1          | HNU |
| LH_Caudate                      | ICC3 | 0.967 | 292.06 | 26 | 234 | 8.04E-163 | 0.9496  | 0.9805 | v5.3          | HNU |
| LH_Caudate                      | ICC2 | 0.881 | 56.52  | 26 | 26  | 5.67E-17  | 0.1631  | 0.9629 | v5.3 vs. v6.0 | HNU |
| LH_Caudate                      | ICC2 | 0.889 | 38.49  | 26 | 26  | 6.87E-15  | 0.4181  | 0.9604 | v5.3 vs. v7.1 | HNU |
| LH_Caudate                      | ICC3 | 0.971 | 338.75 | 26 | 234 | 3.99E-170 | 0.9562  | 0.9831 | v6.0          | HNU |
| LH_Caudate                      | ICC2 | 0.976 | 95.05  | 26 | 26  | 7.82E-20  | 0.9519  | 0.9881 | v6.0 vs. v7.1 | HNU |
| LH_Caudate                      | ICC3 | 0.973 | 359.36 | 26 | 234 | 4.80E-173 | 0.9587  | 0.9841 | v7.1          | HNU |
| LH_cuneus_surfavg               | ICC3 | 0.889 | 80.91  | 26 | 234 | 8.35E-102 | 0.8372  | 0.9325 | v5.3          | HNU |
| LH_cuneus_surfavg               | ICC2 | 0.847 | 17.16  | 26 | 26  | 1.19E-10  | 0.6139  | 0.9295 | v5.3 vs. v6.0 | HNU |
| LH_cuneus_surfavg               | ICC2 | 0.736 | 14.73  | 26 | 26  | 6.95E-10  | 0.1314  | 0.8966 | v5.3 vs. v7.1 | HNU |
| LH_cuneus_surfavg               | ICC3 | 0.938 | 151.88 | 26 | 234 | 4.03E-131 | 0.9069  | 0.9630 | v6.0          | HNU |
| LH_cuneus_surfavg               | ICC2 | 0.935 | 55.33  | 26 | 26  | 7.41E-17  | 0.7092  | 0.9754 | v6.0 vs. v7.1 | HNU |
| LH_cuneus_surfavg               | ICC3 | 0.947 | 177.92 | 26 | 234 | 1.06E-138 | 0.9196  | 0.9683 | v7.1          | HNU |
| LH_cuneus_thickavg              | ICC3 | 0.758 | 32.25  | 26 | 234 | 6.23E-63  | 0.6655  | 0.8450 | v5.3          | HNU |
| LH_cuneus_thickavg              | ICC2 | 0.674 | 10.00  | 26 | 26  | 5.24E-08  | 0.1292  | 0.8602 | v5.3 vs. v6.0 | HNU |
| LH_cuneus_thickavg              | ICC2 | 0.756 | 10.48  | 26 | 26  | 3.16E-08  | 0.4302  | 0.8848 | v5.3 vs. v7.1 | HNU |
| LH_cuneus_thickavg              | ICC3 | 0.802 | 41.48  | 26 | 234 | 6.17E-73  | 0.7213  | 0.8756 | v6.0          | HNU |
| LH_cuneus_thickavg              | ICC2 | 0.887 | 19.08  | 26 | 26  | 3.41E-11  | 0.7794  | 0.9416 | v6.0 vs. v7.1 | HNU |
| LH_cuneus_thickavg              | ICC3 | 0.798 | 40.49  | 26 | 234 | 5.94E-72  | 0.7162  | 0.8729 | v7.1          | HNU |
| LH_entorhinal_surfavg           | ICC3 | 0.647 | 19.35  | 26 | 234 | 1.38E-44  | 0.5358  | 0.7636 | v5.3          | HNU |
| LH_entorhinal_surfavg           | ICC2 | 0.370 | 2.29   | 26 | 26  | 1.94E-02  | 0.0796  | 0.6084 | v5.3 vs. v6.0 | HNU |
| LH_entorhinal_surfavg           | ICC2 | 0.485 | 2.85   | 26 | 26  | 4.81E-03  | 0.1980  | 0.6953 | v5.3 vs. v7.1 | HNU |
| LH_entorhinal_surfavg           | ICC3 | 0.796 | 40.12  | 26 | 234 | 1.39E-71  | 0.7143  | 0.8719 | v6.0          | HNU |
| LH_entorhinal_surfavg           | ICC2 | 0.840 | 13.28  | 26 | 26  | 2.26E-09  | 0.6936  | 0.9165 | v6.0 vs. v7.1 | HNU |
| LH_entorhinal_surfavg           | ICC3 | 0.864 | 64.66  | 26 | 234 | 8.47E-92  | 0.8035  | 0.9169 | v7.1          | HNU |
| LH_entorhinal_thickavg          | ICC3 | 0.515 | 11.63  | 26 | 234 | 2.11E-29  | 0.3952  | 0.6553 | v5.3          | HNU |
| LH_entorhinal_thickavg          | ICC2 | 0.691 | 9.80   | 26 | 26  | 6.50E-08  | 0.1964  | 0.8643 | v5.3 vs. v6.0 | HNU |
| LH_entorhinal_thickavg          | ICC2 | 0.670 | 6.55   | 26 | 26  | 4.17E-06  | 0.3703  | 0.8273 | v5.3 vs. v7.1 | HNU |
| LH_entorhinal_thickavg          | ICC3 | 0.465 | 9.68   | 26 | 234 | 8.42E-25  | 0.3453  | 0.6103 | v6.0          | HNU |
| LH_entorhinal_thickavg          | ICC2 | 0.408 | 6.83   | 26 | 26  | 2.76E-06  | -0.0664 | 0.7137 | v6.0 vs. v7.1 | HNU |
| LH_entorhinal_thickavg          | ICC3 | 0.429 | 8.52   | 26 | 234 | 7.12E-22  | 0.3115  | 0.5775 | v7.1          | HNU |
| LH_frontalpole_surfavg          | ICC3 | 0.669 | 21.26  | 26 | 234 | 9.74E-48  | 0.5609  | 0.7806 | v5.3          | HNU |
| LH_frontalpole_surfavg          | ICC2 | 0.272 | 4.26   | 26 | 26  | 2.19E-04  | -0.0699 | 0.5786 | v5.3 vs. v6.0 | HNU |
| LH_frontalpole_surfavg          | ICC2 | 0.187 | 5.02   | 26 | 26  | 5.14E-05  | -0.0452 | 0.4787 | v5.3 vs. v7.1 | HNU |
| LH_frontalpole_surfavg          | ICC3 | 0.746 | 30.34  | 26 | 234 | 1.34E-60  | 0.6511  | 0.8367 | v6.0          | HNU |
| LH_frontalpole_surfavg          | ICC2 | 0.541 | 6.64   | 26 | 26  | 3.66E-06  | 0.0121  | 0.7855 | v6.0 vs. v7.1 | HNU |
| LH_frontalpole_surfavg          | ICC3 | 0.781 | 36.69  | 26 | 234 | 5.46E-68  | 0.6949  | 0.8614 | v7.1          | HNU |
| LH_frontalpole_thickavg         | ICC3 | 0.682 | 22.44  | 26 | 234 | 1.32E-49  | 0.5752  | 0.7900 | v5.3          | HNU |

|                              |      |       |        |    |     |           |        |        |               |     |
|------------------------------|------|-------|--------|----|-----|-----------|--------|--------|---------------|-----|
| LH_frontalpole_thickavg      | ICC2 | 0.601 | 4.00   | 26 | 26  | 3.67E-04  | 0.3534 | 0.7702 | v5.3 vs. v6.0 | HNU |
| LH_frontalpole_thickavg      | ICC2 | 0.685 | 5.61   | 26 | 26  | 1.86E-05  | 0.4731 | 0.8224 | v5.3 vs. v7.1 | HNU |
| LH_frontalpole_thickavg      | ICC3 | 0.754 | 31.61  | 26 | 234 | 3.63E-62  | 0.6608 | 0.8423 | v6.0          | HNU |
| LH_frontalpole_thickavg      | ICC2 | 0.843 | 11.48  | 26 | 26  | 1.15E-08  | 0.7188 | 0.9156 | v6.0 vs. v7.1 | HNU |
| LH_frontalpole_thickavg      | ICC3 | 0.743 | 29.85  | 26 | 234 | 5.58E-60  | 0.6472 | 0.8344 | v7.1          | HNU |
| LH_fusiform_surfvag          | ICC3 | 0.943 | 167.19 | 26 | 234 | 1.03E-135 | 0.9148 | 0.9663 | v5.3          | HNU |
| LH_fusiform_surfvag          | ICC2 | 0.779 | 11.82  | 26 | 26  | 8.33E-09  | 0.4659 | 0.8973 | v5.3 vs. v6.0 | HNU |
| LH_fusiform_surfvag          | ICC2 | 0.781 | 10.38  | 26 | 26  | 3.49E-08  | 0.5512 | 0.8895 | v5.3 vs. v7.1 | HNU |
| LH_fusiform_surfvag          | ICC3 | 0.978 | 452.61 | 26 | 234 | 1.74E-184 | 0.9669 | 0.9873 | v6.0          | HNU |
| LH_fusiform_surfvag          | ICC2 | 0.979 | 102.53 | 26 | 26  | 2.97E-20  | 0.9603 | 0.9894 | v6.0 vs. v7.1 | HNU |
| LH_fusiform_surfvag          | ICC3 | 0.975 | 392.30 | 26 | 234 | 2.19E-177 | 0.9620 | 0.9854 | v7.1          | HNU |
| LH_fusiform_thickavg         | ICC3 | 0.585 | 15.08  | 26 | 234 | 9.98E-37  | 0.4673 | 0.7139 | v5.3          | HNU |
| LH_fusiform_thickavg         | ICC2 | 0.700 | 6.69   | 26 | 26  | 3.40E-06  | 0.4610 | 0.8375 | v5.3 vs. v6.0 | HNU |
| LH_fusiform_thickavg         | ICC2 | 0.799 | 9.12   | 26 | 26  | 1.41E-07  | 0.6480 | 0.8900 | v5.3 vs. v7.1 | HNU |
| LH_fusiform_thickavg         | ICC3 | 0.623 | 17.56  | 26 | 234 | 1.99E-41  | 0.5093 | 0.7450 | v6.0          | HNU |
| LH_fusiform_thickavg         | ICC2 | 0.709 | 9.30   | 26 | 26  | 1.15E-07  | 0.2994 | 0.8656 | v6.0 vs. v7.1 | HNU |
| LH_fusiform_thickavg         | ICC3 | 0.695 | 23.81  | 26 | 234 | 1.10E-51  | 0.5907 | 0.7999 | v7.1          | HNU |
| LH_Hippocampus               | ICC3 | 0.660 | 20.43  | 26 | 234 | 2.17E-46  | 0.5503 | 0.7735 | v5.3          | HNU |
| LH_Hippocampus               | ICC2 | 0.769 | 10.80  | 26 | 26  | 2.27E-08  | 0.4720 | 0.8895 | v5.3 vs. v6.0 | HNU |
| LH_Hippocampus               | ICC2 | 0.729 | 18.30  | 26 | 26  | 5.58E-11  | 0.0369 | 0.9008 | v5.3 vs. v7.1 | HNU |
| LH_Hippocampus               | ICC3 | 0.864 | 64.69  | 26 | 234 | 7.99E-92  | 0.8036 | 0.9169 | v6.0          | HNU |
| LH_Hippocampus               | ICC2 | 0.885 | 26.94  | 26 | 26  | 5.49E-13  | 0.6195 | 0.9523 | v6.0 vs. v7.1 | HNU |
| LH_Hippocampus               | ICC3 | 0.901 | 91.71  | 26 | 234 | 1.67E-107 | 0.8539 | 0.9401 | v7.1          | HNU |
| LH_inferiorparietal_surfvag  | ICC3 | 0.980 | 497.53 | 26 | 234 | 3.41E-189 | 0.9698 | 0.9884 | v5.3          | HNU |
| LH_inferiorparietal_surfvag  | ICC2 | 0.909 | 21.65  | 26 | 26  | 7.61E-12  | 0.8329 | 0.9518 | v5.3 vs. v6.0 | HNU |
| LH_inferiorparietal_surfvag  | ICC2 | 0.896 | 17.68  | 26 | 26  | 8.38E-11  | 0.8089 | 0.9448 | v5.3 vs. v7.1 | HNU |
| LH_inferiorparietal_surfvag  | ICC3 | 0.987 | 755.48 | 26 | 234 | 4.45E-210 | 0.9799 | 0.9924 | v6.0          | HNU |
| LH_inferiorparietal_surfvag  | ICC2 | 0.983 | 145.17 | 26 | 26  | 3.47E-22  | 0.9611 | 0.9919 | v6.0 vs. v7.1 | HNU |
| LH_inferiorparietal_surfvag  | ICC3 | 0.983 | 577.70 | 26 | 234 | 1.20E-196 | 0.9739 | 0.9900 | v7.1          | HNU |
| LH_inferiorparietal_thickavg | ICC3 | 0.802 | 41.41  | 26 | 234 | 7.20E-73  | 0.7209 | 0.8754 | v5.3          | HNU |
| LH_inferiorparietal_thickavg | ICC2 | 0.779 | 21.45  | 26 | 26  | 8.54E-12  | 0.1082 | 0.9202 | v5.3 vs. v6.0 | HNU |
| LH_inferiorparietal_thickavg | ICC2 | 0.806 | 10.02  | 26 | 26  | 5.12E-08  | 0.6538 | 0.8949 | v5.3 vs. v7.1 | HNU |
| LH_inferiorparietal_thickavg | ICC3 | 0.810 | 43.63  | 26 | 234 | 5.18E-75  | 0.7317 | 0.8811 | v6.0          | HNU |
| LH_inferiorparietal_thickavg | ICC2 | 0.812 | 15.32  | 26 | 26  | 4.42E-10  | 0.4742 | 0.9177 | v6.0 vs. v7.1 | HNU |
| LH_inferiorparietal_thickavg | ICC3 | 0.772 | 34.92  | 26 | 234 | 4.90E-66  | 0.6838 | 0.8553 | v7.1          | HNU |
| LH_inferiortemporal_surfvag  | ICC3 | 0.937 | 148.91 | 26 | 234 | 3.53E-130 | 0.9052 | 0.9623 | v5.3          | HNU |
| LH_inferiortemporal_surfvag  | ICC2 | 0.887 | 36.85  | 26 | 26  | 1.18E-14  | 0.4343 | 0.9594 | v5.3 vs. v6.0 | HNU |
| LH_inferiortemporal_surfvag  | ICC2 | 0.839 | 20.76  | 26 | 26  | 1.26E-11  | 0.4418 | 0.9353 | v5.3 vs. v7.1 | HNU |
| LH_inferiortemporal_surfvag  | ICC3 | 0.926 | 126.03 | 26 | 234 | 2.79E-122 | 0.8897 | 0.9557 | v6.0          | HNU |
| LH_inferiortemporal_surfvag  | ICC2 | 0.965 | 54.02  | 26 | 26  | 1.00E-16  | 0.9331 | 0.9815 | v6.0 vs. v7.1 | HNU |
| LH_inferiortemporal_surfvag  | ICC3 | 0.957 | 224.61 | 26 | 234 | 5.59E-150 | 0.9353 | 0.9747 | v7.1          | HNU |
| LH_inferiortemporal_thickavg | ICC3 | 0.538 | 12.64  | 26 | 234 | 1.18E-31  | 0.4183 | 0.6748 | v5.3          | HNU |
| LH_inferiortemporal_thickavg | ICC2 | 0.575 | 4.77   | 26 | 26  | 8.20E-05  | 0.2519 | 0.7677 | v5.3 vs. v6.0 | HNU |
| LH_inferiortemporal_thickavg | ICC2 | 0.627 | 4.69   | 26 | 26  | 9.46E-05  | 0.3882 | 0.7867 | v5.3 vs. v7.1 | HNU |

|                                 |      |       |        |    |     |           |         |        |               |     |
|---------------------------------|------|-------|--------|----|-----|-----------|---------|--------|---------------|-----|
| LH_inferiortemporal_thickavg    | ICC3 | 0.626 | 17.75  | 26 | 234 | 8.91E-42  | 0.5123  | 0.7472 | v6.0          | HNU |
| LH_inferiortemporal_thickavg    | ICC2 | 0.583 | 11.69  | 26 | 26  | 9.45E-09  | -0.0421 | 0.8314 | v6.0 vs. v7.1 | HNU |
| LH_inferiortemporal_thickavg    | ICC3 | 0.622 | 17.47  | 26 | 234 | 2.93E-41  | 0.5079  | 0.7440 | v7.1          | HNU |
| LH_insula_surfvag               | ICC3 | 0.846 | 56.12  | 26 | 234 | 1.23E-85  | 0.7796  | 0.9053 | v5.3          | HNU |
| LH_insula_surfvag               | ICC2 | 0.626 | 29.26  | 26 | 26  | 2.01E-13  | -0.0325 | 0.8677 | v5.3 vs. v6.0 | HNU |
| LH_insula_surfvag               | ICC2 | 0.647 | 19.08  | 26 | 26  | 3.42E-11  | -0.0370 | 0.8709 | v5.3 vs. v7.1 | HNU |
| LH_insula_surfvag               | ICC3 | 0.851 | 58.12  | 26 | 234 | 3.77E-87  | 0.7857  | 0.9083 | v6.0          | HNU |
| LH_insula_surfvag               | ICC2 | 0.858 | 13.98  | 26 | 26  | 1.26E-09  | 0.7424  | 0.9242 | v6.0 vs. v7.1 | HNU |
| LH_insula_surfvag               | ICC3 | 0.887 | 79.62  | 26 | 234 | 4.48E-101 | 0.8350  | 0.9315 | v7.1          | HNU |
| LH_insula_thickavg              | ICC3 | 0.590 | 15.41  | 26 | 234 | 2.24E-37  | 0.4733  | 0.7185 | v5.3          | HNU |
| LH_insula_thickavg              | ICC2 | 0.584 | 4.21   | 26 | 26  | 2.43E-04  | 0.3269  | 0.7603 | v5.3 vs. v6.0 | HNU |
| LH_insula_thickavg              | ICC2 | 0.700 | 7.58   | 26 | 26  | 9.66E-07  | 0.3936  | 0.8476 | v5.3 vs. v7.1 | HNU |
| LH_insula_thickavg              | ICC3 | 0.516 | 11.64  | 26 | 234 | 1.96E-29  | 0.3955  | 0.6556 | v6.0          | HNU |
| LH_insula_thickavg              | ICC2 | 0.704 | 5.65   | 26 | 26  | 1.73E-05  | 0.4986  | 0.8349 | v6.0 vs. v7.1 | HNU |
| LH_insula_thickavg              | ICC3 | 0.661 | 20.46  | 26 | 234 | 1.95E-46  | 0.5507  | 0.7738 | v7.1          | HNU |
| LH_isthmuscingulate_surfvag     | ICC3 | 0.764 | 33.32  | 26 | 234 | 3.35E-64  | 0.6731  | 0.8493 | v5.3          | HNU |
| LH_isthmuscingulate_surfvag     | ICC2 | 0.746 | 7.96   | 26 | 26  | 5.84E-07  | 0.5385  | 0.8635 | v5.3 vs. v6.0 | HNU |
| LH_isthmuscingulate_surfvag     | ICC2 | 0.776 | 9.46   | 26 | 26  | 9.50E-08  | 0.5731  | 0.8824 | v5.3 vs. v7.1 | HNU |
| LH_isthmuscingulate_surfvag     | ICC3 | 0.969 | 313.55 | 26 | 234 | 2.58E-166 | 0.9529  | 0.9818 | v6.0          | HNU |
| LH_isthmuscingulate_surfvag     | ICC2 | 0.963 | 51.17  | 26 | 26  | 1.98E-16  | 0.9298  | 0.9807 | v6.0 vs. v7.1 | HNU |
| LH_isthmuscingulate_surfvag     | ICC3 | 0.966 | 288.34 | 26 | 234 | 3.43E-162 | 0.9489  | 0.9802 | v7.1          | HNU |
| LH_isthmuscingulate_thickavg    | ICC3 | 0.780 | 36.55  | 26 | 234 | 7.63E-68  | 0.6941  | 0.8609 | v5.3          | HNU |
| LH_isthmuscingulate_thickavg    | ICC2 | 0.733 | 7.58   | 26 | 26  | 9.75E-07  | 0.5165  | 0.8564 | v5.3 vs. v6.0 | HNU |
| LH_isthmuscingulate_thickavg    | ICC2 | 0.593 | 6.44   | 26 | 26  | 4.94E-06  | 0.1318  | 0.8032 | v5.3 vs. v7.1 | HNU |
| LH_isthmuscingulate_thickavg    | ICC3 | 0.899 | 89.74  | 26 | 234 | 1.64E-106 | 0.8511  | 0.9388 | v6.0          | HNU |
| LH_isthmuscingulate_thickavg    | ICC2 | 0.864 | 20.07  | 26 | 26  | 1.88E-11  | 0.6335  | 0.9389 | v6.0 vs. v7.1 | HNU |
| LH_isthmuscingulate_thickavg    | ICC3 | 0.894 | 85.03  | 26 | 234 | 4.69E-104 | 0.8440  | 0.9356 | v7.1          | HNU |
| LH_lateraloccipital_surfvag     | ICC3 | 0.963 | 261.49 | 26 | 234 | 2.13E-157 | 0.9440  | 0.9782 | v5.3          | HNU |
| LH_lateraloccipital_surfvag     | ICC2 | 0.834 | 21.93  | 26 | 26  | 6.54E-12  | 0.3641  | 0.9356 | v5.3 vs. v6.0 | HNU |
| LH_lateraloccipital_surfvag     | ICC2 | 0.726 | 20.62  | 26 | 26  | 1.37E-11  | 0.0092  | 0.9025 | v5.3 vs. v7.1 | HNU |
| LH_lateraloccipital_surfvag     | ICC3 | 0.983 | 590.85 | 26 | 234 | 9.02E-198 | 0.9745  | 0.9903 | v6.0          | HNU |
| LH_lateraloccipital_surfvag     | ICC2 | 0.951 | 117.56 | 26 | 26  | 5.18E-21  | 0.5254  | 0.9847 | v6.0 vs. v7.1 | HNU |
| LH_lateraloccipital_surfvag     | ICC3 | 0.978 | 446.73 | 26 | 234 | 7.80E-184 | 0.9665  | 0.9871 | v7.1          | HNU |
| LH_lateraloccipital_thickavg    | ICC3 | 0.733 | 28.44  | 26 | 234 | 3.63E-58  | 0.6355  | 0.8274 | v5.3          | HNU |
| LH_lateraloccipital_thickavg    | ICC2 | 0.523 | 7.62   | 26 | 26  | 9.15E-07  | -0.0362 | 0.7856 | v5.3 vs. v6.0 | HNU |
| LH_lateraloccipital_thickavg    | ICC2 | 0.743 | 10.32  | 26 | 26  | 3.71E-08  | 0.3779  | 0.8809 | v5.3 vs. v7.1 | HNU |
| LH_lateraloccipital_thickavg    | ICC3 | 0.813 | 44.60  | 26 | 234 | 6.36E-76  | 0.7362  | 0.8834 | v6.0          | HNU |
| LH_lateraloccipital_thickavg    | ICC2 | 0.791 | 16.91  | 26 | 26  | 1.41E-10  | 0.2823  | 0.9167 | v6.0 vs. v7.1 | HNU |
| LH_lateraloccipital_thickavg    | ICC3 | 0.824 | 47.71  | 26 | 234 | 9.84E-79  | 0.7495  | 0.8902 | v7.1          | HNU |
| LH_lateralorbitofrontal_surfvag | ICC3 | 0.822 | 47.20  | 26 | 234 | 2.76E-78  | 0.7474  | 0.8892 | v5.3          | HNU |
| LH_lateralorbitofrontal_surfvag | ICC2 | 0.897 | 70.00  | 26 | 26  | 3.81E-18  | 0.1737  | 0.9684 | v5.3 vs. v6.0 | HNU |
| LH_lateralorbitofrontal_surfvag | ICC2 | 0.784 | 44.29  | 26 | 26  | 1.20E-15  | -0.0031 | 0.9320 | v5.3 vs. v7.1 | HNU |
| LH_lateralorbitofrontal_surfvag | ICC3 | 0.854 | 59.69  | 26 | 234 | 2.65E-88  | 0.7903  | 0.9105 | v6.0          | HNU |
| LH_lateralorbitofrontal_surfvag | ICC2 | 0.949 | 93.77  | 26 | 26  | 9.29E-20  | 0.6111  | 0.9829 | v6.0 vs. v7.1 | HNU |

|                                  |      |       |         |    |     |            |        |        |               |     |
|----------------------------------|------|-------|---------|----|-----|------------|--------|--------|---------------|-----|
| LH_lateralorbitofrontal_surfvag  | ICC3 | 0.858 | 61.28   | 26 | 234 | 1.90E-89   | 0.7947 | 0.9126 | v7.1          | HNU |
| LH_lateralorbitofrontal_thickavg | ICC3 | 0.562 | 13.81   | 26 | 234 | 3.72E-34   | 0.4430 | 0.6949 | v5.3          | HNU |
| LH_lateralorbitofrontal_thickavg | ICC2 | 0.555 | 6.45    | 26 | 26  | 4.84E-06   | 0.0464 | 0.7896 | v5.3 vs. v6.0 | HNU |
| LH_lateralorbitofrontal_thickavg | ICC2 | 0.659 | 4.94    | 26 | 26  | 6.02E-05   | 0.4368 | 0.8064 | v5.3 vs. v7.1 | HNU |
| LH_lateralorbitofrontal_thickavg | ICC3 | 0.646 | 19.25   | 26 | 234 | 2.05E-44   | 0.5344 | 0.7627 | v6.0          | HNU |
| LH_lateralorbitofrontal_thickavg | ICC2 | 0.646 | 8.30    | 26 | 26  | 3.82E-07   | 0.1441 | 0.8399 | v6.0 vs. v7.1 | HNU |
| LH_lateralorbitofrontal_thickavg | ICC3 | 0.590 | 15.38   | 26 | 234 | 2.58E-37   | 0.4727 | 0.7180 | v7.1          | HNU |
| LH_LateralVentricle              | ICC3 | 0.998 | 4411.36 | 26 | 234 | 3.43E-299  | 0.9965 | 0.9987 | v5.3          | HNU |
| LH_LateralVentricle              | ICC2 | 0.994 | 3267.33 | 26 | 26  | 1.07E-39   | 0.6589 | 0.9986 | v5.3 vs. v6.0 | HNU |
| LH_LateralVentricle              | ICC2 | 0.992 | 2297.69 | 26 | 26  | 1.03E-37   | 0.5745 | 0.9980 | v5.3 vs. v7.1 | HNU |
| LH_LateraVentricle               | ICC3 | 0.998 | 5723.74 | 26 | 234 | 2.12573047 | 0.9973 | 0.9990 | v6.0          | HNU |
| LH_LateraVentricle               | ICC2 | 1.000 | 6984.10 | 26 | 26  | 5.51E-44   | 0.9983 | 0.9998 | v6.0 vs. v7.1 | HNU |
| LH_LateraVentricle               | ICC3 | 0.998 | 5720.17 | 26 | 234 | 2.28660433 | 0.9973 | 0.9990 | v7.1          | HNU |
| LH_lingual_surfvag               | ICC3 | 0.930 | 134.31  | 26 | 234 | 2.78E-125  | 0.8959 | 0.9584 | v5.3          | HNU |
| LH_lingual_surfvag               | ICC2 | 0.864 | 13.50   | 26 | 26  | 1.88E-09   | 0.7546 | 0.9271 | v5.3 vs. v6.0 | HNU |
| LH_lingual_surfvag               | ICC2 | 0.850 | 13.71   | 26 | 26  | 1.58E-09   | 0.7216 | 0.9207 | v5.3 vs. v7.1 | HNU |
| LH_lingual_surfvag               | ICC3 | 0.966 | 283.82  | 26 | 234 | 2.05E-161  | 0.9482 | 0.9799 | v6.0          | HNU |
| LH_lingual_surfvag               | ICC2 | 0.943 | 84.52   | 26 | 26  | 3.48E-19   | 0.5744 | 0.9810 | v6.0 vs. v7.1 | HNU |
| LH_lingual_surfvag               | ICC3 | 0.973 | 368.18  | 26 | 234 | 3.05E-174  | 0.9596 | 0.9844 | v7.1          | HNU |
| LH_lingual_thickavg              | ICC3 | 0.723 | 27.07   | 26 | 234 | 2.53E-56   | 0.6232 | 0.8201 | v5.3          | HNU |
| LH_lingual_thickavg              | ICC2 | 0.527 | 5.91    | 26 | 26  | 1.13E-05   | 0.0291 | 0.7712 | v5.3 vs. v6.0 | HNU |
| LH_lingual_thickavg              | ICC2 | 0.745 | 7.26    | 26 | 26  | 1.50E-06   | 0.5601 | 0.8588 | v5.3 vs. v7.1 | HNU |
| LH_lingual_thickavg              | ICC3 | 0.759 | 32.48   | 26 | 234 | 3.30E-63   | 0.6672 | 0.8459 | v6.0          | HNU |
| LH_lingual_thickavg              | ICC2 | 0.676 | 10.29   | 26 | 26  | 3.83E-08   | 0.1211 | 0.8624 | v6.0 vs. v7.1 | HNU |
| LH_lingual_thickavg              | ICC3 | 0.779 | 36.15   | 26 | 234 | 2.08E-67   | 0.6916 | 0.8596 | v7.1          | HNU |
| LH_medialorbitofrontal_surfvag   | ICC3 | 0.679 | 22.15   | 26 | 234 | 3.73E-49   | 0.5718 | 0.7878 | v5.3          | HNU |
| LH_medialorbitofrontal_surfvag   | ICC2 | 0.808 | 9.20    | 26 | 26  | 1.28E-07   | 0.6600 | 0.8952 | v5.3 vs. v6.0 | HNU |
| LH_medialorbitofrontal_surfvag   | ICC2 | 0.634 | 9.56    | 26 | 26  | 8.55E-08   | 0.0499 | 0.8440 | v5.3 vs. v7.1 | HNU |
| LH_medialorbitofrontal_surfvag   | ICC3 | 0.769 | 34.21   | 26 | 234 | 3.12E-65   | 0.6792 | 0.8527 | v6.0          | HNU |
| LH_medialorbitofrontal_surfvag   | ICC2 | 0.709 | 15.80   | 26 | 26  | 3.10E-10   | 0.0373 | 0.8900 | v6.0 vs. v7.1 | HNU |
| LH_medialorbitofrontal_surfvag   | ICC3 | 0.823 | 47.37   | 26 | 234 | 1.98E-78   | 0.7481 | 0.8895 | v7.1          | HNU |
| LH_medialorbitofrontal_thickavg  | ICC3 | 0.527 | 12.16   | 26 | 234 | 1.36E-30   | 0.4075 | 0.6658 | v5.3          | HNU |
| LH_medialorbitofrontal_thickavg  | ICC2 | 0.559 | 5.50    | 26 | 26  | 2.25E-05   | 0.1287 | 0.7772 | v5.3 vs. v6.0 | HNU |
| LH_medialorbitofrontal_thickavg  | ICC2 | 0.580 | 3.66    | 26 | 26  | 7.51E-04   | 0.3182 | 0.7589 | v5.3 vs. v7.1 | HNU |
| LH_medialorbitofrontal_thickavg  | ICC3 | 0.599 | 15.96   | 26 | 234 | 1.94E-38   | 0.4830 | 0.7257 | v6.0          | HNU |
| LH_medialorbitofrontal_thickavg  | ICC2 | 0.515 | 4.37    | 26 | 26  | 1.76E-04   | 0.1412 | 0.7370 | v6.0 vs. v7.1 | HNU |
| LH_medialorbitofrontal_thickavg  | ICC3 | 0.549 | 13.16   | 26 | 234 | 8.95E-33   | 0.4295 | 0.6840 | v7.1          | HNU |
| LH_middletemporal_surfvag        | ICC3 | 0.932 | 138.71  | 26 | 234 | 8.28E-127  | 0.8989 | 0.9596 | v5.3          | HNU |
| LH_middletemporal_surfvag        | ICC2 | 0.793 | 17.05   | 26 | 26  | 1.28E-10   | 0.2893 | 0.9176 | v5.3 vs. v6.0 | HNU |
| LH_middletemporal_surfvag        | ICC2 | 0.739 | 19.42   | 26 | 26  | 2.77E-11   | 0.0408 | 0.9055 | v5.3 vs. v7.1 | HNU |
| LH_middletemporal_surfvag        | ICC3 | 0.946 | 174.79  | 26 | 234 | 7.59E-138  | 0.9182 | 0.9677 | v6.0          | HNU |
| LH_middletemporal_surfvag        | ICC2 | 0.954 | 57.79   | 26 | 26  | 4.28E-17   | 0.8817 | 0.9792 | v6.0 vs. v7.1 | HNU |
| LH_middletemporal_surfvag        | ICC3 | 0.962 | 255.04  | 26 | 234 | 3.54E-156  | 0.9426 | 0.9777 | v7.1          | HNU |
| LH_middletemporal_thickavg       | ICC3 | 0.745 | 30.14   | 26 | 234 | 2.40E-60   | 0.6495 | 0.8357 | v5.3          | HNU |

|                             |      |       |         |    |     |           |         |        |               |     |
|-----------------------------|------|-------|---------|----|-----|-----------|---------|--------|---------------|-----|
| LH_middletemporal_thickavg  | ICC2 | 0.831 | 13.16   | 26 | 26  | 2.51E-09  | 0.6612  | 0.9139 | v5.3 vs. v6.0 | HNU |
| LH_middletemporal_thickavg  | ICC2 | 0.857 | 15.08   | 26 | 26  | 5.32E-10  | 0.7200  | 0.9258 | v5.3 vs. v7.1 | HNU |
| LH_middletemporal_thickavg  | ICC3 | 0.848 | 56.72   | 26 | 234 | 4.26E-86  | 0.7815  | 0.9062 | v6.0          | HNU |
| LH_middletemporal_thickavg  | ICC2 | 0.785 | 23.16   | 26 | 26  | 3.40E-12  | 0.0977  | 0.9236 | v6.0 vs. v7.1 | HNU |
| LH_middletemporal_thickavg  | ICC3 | 0.844 | 54.93   | 26 | 234 | 1.03E-84  | 0.7758  | 0.9034 | v7.1          | HNU |
| LH_Pallidum                 | ICC3 | 0.759 | 32.42   | 26 | 234 | 3.90E-63  | 0.6667  | 0.8457 | v5.3          | HNU |
| LH_Pallidum                 | ICC2 | 0.524 | 4.37    | 26 | 26  | 1.76E-04  | 0.1639  | 0.7404 | v5.3 vs. v6.0 | HNU |
| LH_Pallidum                 | ICC2 | 0.459 | 3.98    | 26 | 26  | 3.87E-04  | 0.0656  | 0.7035 | v5.3 vs. v7.1 | HNU |
| LH_Pallidum                 | ICC3 | 0.854 | 59.51   | 26 | 234 | 3.58E-88  | 0.7898  | 0.9102 | v6.0          | HNU |
| LH_Pallidum                 | ICC2 | 0.937 | 44.18   | 26 | 26  | 1.24E-15  | 0.8168  | 0.9722 | v6.0 vs. v7.1 | HNU |
| LH_Pallidum                 | ICC3 | 0.839 | 53.00   | 26 | 234 | 3.49E-83  | 0.7693  | 0.9002 | v7.1          | HNU |
| LH_paracentral_surfavg      | ICC3 | 0.946 | 174.96  | 26 | 234 | 6.80E-138 | 0.9183  | 0.9678 | v5.3          | HNU |
| LH_paracentral_surfavg      | ICC2 | 0.849 | 13.61   | 26 | 26  | 1.71E-09  | 0.7201  | 0.9202 | v5.3 vs. v6.0 | HNU |
| LH_paracentral_surfavg      | ICC2 | 0.839 | 12.82   | 26 | 26  | 3.37E-09  | 0.6985  | 0.9147 | v5.3 vs. v7.1 | HNU |
| LH_paracentral_surfavg      | ICC3 | 0.949 | 187.43  | 26 | 234 | 3.28E-141 | 0.9234  | 0.9698 | v6.0          | HNU |
| LH_paracentral_surfavg      | ICC2 | 0.977 | 82.31   | 26 | 26  | 4.88E-19  | 0.9556  | 0.9878 | v6.0 vs. v7.1 | HNU |
| LH_paracentral_surfavg      | ICC3 | 0.954 | 210.24  | 26 | 234 | 9.12E-147 | 0.9312  | 0.9730 | v7.1          | HNU |
| LH_paracentral_thickavg     | ICC3 | 0.726 | 27.44   | 26 | 234 | 7.79E-57  | 0.6267  | 0.8222 | v5.3          | HNU |
| LH_paracentral_thickavg     | ICC2 | 0.535 | 17.74   | 26 | 26  | 8.06E-11  | -0.0440 | 0.8167 | v5.3 vs. v6.0 | HNU |
| LH_paracentral_thickavg     | ICC2 | 0.521 | 12.84   | 26 | 26  | 3.31E-09  | -0.0534 | 0.8029 | v5.3 vs. v7.1 | HNU |
| LH_paracentral_thickavg     | ICC3 | 0.739 | 29.36   | 26 | 234 | 2.36E-59  | 0.6432  | 0.8320 | v6.0          | HNU |
| LH_paracentral_thickavg     | ICC2 | 0.869 | 13.76   | 26 | 26  | 1.52E-09  | 0.7608  | 0.9297 | v6.0 vs. v7.1 | HNU |
| LH_paracentral_thickavg     | ICC3 | 0.732 | 28.25   | 26 | 234 | 6.63E-58  | 0.6338  | 0.8264 | v7.1          | HNU |
| LH parahippocampal_surfavg  | ICC3 | 0.504 | 11.17   | 26 | 234 | 2.39E-28  | 0.3841  | 0.6456 | v5.3          | HNU |
| LH parahippocampal_surfavg  | ICC2 | 0.481 | 7.31    | 26 | 26  | 1.40E-06  | -0.0547 | 0.7616 | v5.3 vs. v6.0 | HNU |
| LH parahippocampal_surfavg  | ICC2 | 0.372 | 5.09    | 26 | 26  | 4.58E-05  | -0.0673 | 0.6740 | v5.3 vs. v7.1 | HNU |
| LH parahippocampal_surfavg  | ICC3 | 0.945 | 174.26  | 26 | 234 | 1.06E-137 | 0.9180  | 0.9676 | v6.0          | HNU |
| LH parahippocampal_surfavg  | ICC2 | 0.871 | 15.38   | 26 | 26  | 4.24E-10  | 0.7643  | 0.9311 | v6.0 vs. v7.1 | HNU |
| LH parahippocampal_surfavg  | ICC3 | 0.914 | 107.22  | 26 | 234 | 1.02E-114 | 0.8726  | 0.9483 | v7.1          | HNU |
| LH parahippocampal_thickavg | ICC3 | 0.864 | 64.77   | 26 | 234 | 7.05E-92  | 0.8038  | 0.9170 | v5.3          | HNU |
| LH parahippocampal_thickavg | ICC2 | 0.847 | 32.77   | 26 | 26  | 5.00E-14  | 0.2065  | 0.9475 | v5.3 vs. v6.0 | HNU |
| LH parahippocampal_thickavg | ICC2 | 0.916 | 22.63   | 26 | 26  | 4.50E-12  | 0.8447  | 0.9552 | v5.3 vs. v7.1 | HNU |
| LH parahippocampal_thickavg | ICC3 | 0.896 | 87.06   | 26 | 234 | 3.96E-105 | 0.8471  | 0.9370 | v6.0          | HNU |
| LH parahippocampal_thickavg | ICC2 | 0.788 | 24.07   | 26 | 26  | 2.14E-12  | 0.0944  | 0.9253 | v6.0 vs. v7.1 | HNU |
| LH parahippocampal_thickavg | ICC3 | 0.899 | 89.88   | 26 | 234 | 1.38E-106 | 0.8513  | 0.9389 | v7.1          | HNU |
| LH_parsopercularis_surfavg  | ICC3 | 0.984 | 599.10  | 26 | 234 | 1.83E-198 | 0.9748  | 0.9904 | v5.3          | HNU |
| LH_parsopercularis_surfavg  | ICC2 | 0.915 | 29.90   | 26 | 26  | 1.54E-13  | 0.7939  | 0.9602 | v5.3 vs. v6.0 | HNU |
| LH_parsopercularis_surfavg  | ICC2 | 0.923 | 31.76   | 26 | 26  | 7.37E-14  | 0.8253  | 0.9631 | v5.3 vs. v7.1 | HNU |
| LH_parsopercularis_surfavg  | ICC3 | 0.992 | 1297.23 | 26 | 234 | 2.84E-237 | 0.9882  | 0.9955 | v6.0          | HNU |
| LH_parsopercularis_surfavg  | ICC2 | 0.989 | 184.84  | 26 | 26  | 1.55E-23  | 0.9796  | 0.9944 | v6.0 vs. v7.1 | HNU |
| LH_parsopercularis_surfavg  | ICC3 | 0.991 | 1052.30 | 26 | 234 | 9.93E-227 | 0.9855  | 0.9945 | v7.1          | HNU |
| LH_parsopercularis_thickavg | ICC3 | 0.773 | 35.02   | 26 | 234 | 3.76E-66  | 0.6845  | 0.8556 | v5.3          | HNU |
| LH_parsopercularis_thickavg | ICC2 | 0.727 | 17.65   | 26 | 26  | 8.52E-11  | 0.0416  | 0.8991 | v5.3 vs. v6.0 | HNU |
| LH_parsopercularis_thickavg | ICC2 | 0.854 | 28.44   | 26 | 26  | 2.84E-13  | 0.3298  | 0.9466 | v5.3 vs. v7.1 | HNU |

|                              |      |       |        |    |     |           |         |        |               |     |
|------------------------------|------|-------|--------|----|-----|-----------|---------|--------|---------------|-----|
| LH_parsopercularis_thickavg  | ICC3 | 0.853 | 58.80  | 26 | 234 | 1.19E-87  | 0.7877  | 0.9093 | v6.0          | HNU |
| LH_parsopercularis_thickavg  | ICC2 | 0.900 | 24.20  | 26 | 26  | 2.01E-12  | 0.7751  | 0.9516 | v6.0 vs. v7.1 | HNU |
| LH_parsopercularis_thickavg  | ICC3 | 0.828 | 49.18  | 26 | 234 | 5.26E-80  | 0.7553  | 0.8932 | v7.1          | HNU |
| LH_parsorbitalis_surfavg     | ICC3 | 0.895 | 86.64  | 26 | 234 | 6.57E-105 | 0.8465  | 0.9368 | v5.3          | HNU |
| LH_parsorbitalis_surfavg     | ICC2 | 0.744 | 22.33  | 26 | 26  | 5.27E-12  | 0.0195  | 0.9099 | v5.3 vs. v6.0 | HNU |
| LH_parsorbitalis_surfavg     | ICC2 | 0.562 | 9.92   | 26 | 26  | 5.72E-08  | -0.0405 | 0.8160 | v5.3 vs. v7.1 | HNU |
| LH_parsorbitalis_surfavg     | ICC3 | 0.940 | 157.88 | 26 | 234 | 5.70E-133 | 0.9102  | 0.9644 | v6.0          | HNU |
| LH_parsorbitalis_surfavg     | ICC2 | 0.899 | 31.77  | 26 | 26  | 7.32E-14  | 0.6419  | 0.9590 | v6.0 vs. v7.1 | HNU |
| LH_parsorbitalis_surfavg     | ICC3 | 0.950 | 189.38 | 26 | 234 | 1.04E-141 | 0.9241  | 0.9701 | v7.1          | HNU |
| LH_parsorbitalis_thickavg    | ICC3 | 0.771 | 34.58  | 26 | 234 | 1.20E-65  | 0.6816  | 0.8540 | v5.3          | HNU |
| LH_parsorbitalis_thickavg    | ICC2 | 0.711 | 11.09  | 26 | 26  | 1.69E-08  | 0.1957  | 0.8769 | v5.3 vs. v6.0 | HNU |
| LH_parsorbitalis_thickavg    | ICC2 | 0.766 | 8.46   | 26 | 26  | 3.09E-07  | 0.5795  | 0.8732 | v5.3 vs. v7.1 | HNU |
| LH_parsorbitalis_thickavg    | ICC3 | 0.788 | 38.19  | 26 | 234 | 1.35E-69  | 0.7037  | 0.8662 | v6.0          | HNU |
| LH_parsorbitalis_thickavg    | ICC2 | 0.769 | 9.47   | 26 | 26  | 9.45E-08  | 0.5477  | 0.8808 | v6.0 vs. v7.1 | HNU |
| LH_parsorbitalis_thickavg    | ICC3 | 0.761 | 32.76  | 26 | 234 | 1.52E-63  | 0.6692  | 0.8471 | v7.1          | HNU |
| LH_parstriangularis_surfavg  | ICC3 | 0.969 | 318.00 | 26 | 234 | 5.22E-167 | 0.9535  | 0.9820 | v5.3          | HNU |
| LH_parstriangularis_surfavg  | ICC2 | 0.852 | 13.77  | 26 | 26  | 1.50E-09  | 0.7256  | 0.9214 | v5.3 vs. v6.0 | HNU |
| LH_parstriangularis_surfavg  | ICC2 | 0.814 | 11.91  | 26 | 26  | 7.72E-09  | 0.6305  | 0.9050 | v5.3 vs. v7.1 | HNU |
| LH_parstriangularis_surfavg  | ICC3 | 0.982 | 559.83 | 26 | 234 | 4.45E-195 | 0.9731  | 0.9897 | v6.0          | HNU |
| LH_parstriangularis_surfavg  | ICC2 | 0.982 | 137.77 | 26 | 26  | 6.78E-22  | 0.9561  | 0.9914 | v6.0 vs. v7.1 | HNU |
| LH_parstriangularis_surfavg  | ICC3 | 0.989 | 883.69 | 26 | 234 | 6.02E-218 | 0.9828  | 0.9935 | v7.1          | HNU |
| LH_parstriangularis_thickavg | ICC3 | 0.791 | 38.76  | 26 | 234 | 3.45E-70  | 0.7069  | 0.8679 | v5.3          | HNU |
| LH_parstriangularis_thickavg | ICC2 | 0.579 | 13.61  | 26 | 26  | 1.71E-09  | -0.0482 | 0.8336 | v5.3 vs. v6.0 | HNU |
| LH_parstriangularis_thickavg | ICC2 | 0.743 | 14.58  | 26 | 26  | 7.79E-10  | 0.1584  | 0.8981 | v5.3 vs. v7.1 | HNU |
| LH_parstriangularis_thickavg | ICC3 | 0.835 | 51.42  | 26 | 234 | 6.75E-82  | 0.7637  | 0.8974 | v6.0          | HNU |
| LH_parstriangularis_thickavg | ICC2 | 0.840 | 17.28  | 26 | 26  | 1.10E-10  | 0.5682  | 0.9286 | v6.0 vs. v7.1 | HNU |
| LH_parstriangularis_thickavg | ICC3 | 0.791 | 38.82  | 26 | 234 | 2.98E-70  | 0.7072  | 0.8681 | v7.1          | HNU |
| LH_pericalcarine_surfavg     | ICC3 | 0.891 | 82.74  | 26 | 234 | 8.20E-103 | 0.8403  | 0.9339 | v5.3          | HNU |
| LH_pericalcarine_surfavg     | ICC2 | 0.883 | 33.61  | 26 | 26  | 3.67E-14  | 0.4570  | 0.9568 | v5.3 vs. v6.0 | HNU |
| LH_pericalcarine_surfavg     | ICC2 | 0.851 | 24.39  | 26 | 26  | 1.83E-12  | 0.4106  | 0.9424 | v5.3 vs. v7.1 | HNU |
| LH_pericalcarine_surfavg     | ICC3 | 0.935 | 145.88 | 26 | 234 | 3.34E-129 | 0.9034  | 0.9615 | v6.0          | HNU |
| LH_pericalcarine_surfavg     | ICC2 | 0.960 | 48.78  | 26 | 26  | 3.60E-16  | 0.9245  | 0.9789 | v6.0 vs. v7.1 | HNU |
| LH_pericalcarine_surfavg     | ICC3 | 0.940 | 156.74 | 26 | 234 | 1.27E-132 | 0.9096  | 0.9641 | v7.1          | HNU |
| LH_pericalcarine_thickavg    | ICC3 | 0.747 | 30.58  | 26 | 234 | 6.82E-61  | 0.6530  | 0.8377 | v5.3          | HNU |
| LH_pericalcarine_thickavg    | ICC2 | 0.704 | 12.15  | 26 | 26  | 6.17E-09  | 0.1230  | 0.8792 | v5.3 vs. v6.0 | HNU |
| LH_pericalcarine_thickavg    | ICC2 | 0.695 | 6.70   | 26 | 26  | 3.35E-06  | 0.4444  | 0.8361 | v5.3 vs. v7.1 | HNU |
| LH_pericalcarine_thickavg    | ICC3 | 0.768 | 34.17  | 26 | 234 | 3.48E-65  | 0.6789  | 0.8525 | v6.0          | HNU |
| LH_pericalcarine_thickavg    | ICC2 | 0.862 | 17.80  | 26 | 26  | 7.75E-11  | 0.6841  | 0.9338 | v6.0 vs. v7.1 | HNU |
| LH_pericalcarine_thickavg    | ICC3 | 0.838 | 52.78  | 26 | 234 | 5.28E-83  | 0.7685  | 0.8998 | v7.1          | HNU |
| LH_postcentral_surfavg       | ICC3 | 0.958 | 231.55 | 26 | 234 | 1.85E-151 | 0.9371  | 0.9755 | v5.3          | HNU |
| LH_postcentral_surfavg       | ICC2 | 0.937 | 33.51  | 26 | 26  | 3.80E-14  | 0.8792  | 0.9673 | v5.3 vs. v6.0 | HNU |
| LH_postcentral_surfavg       | ICC2 | 0.930 | 26.61  | 26 | 26  | 6.38E-13  | 0.8691  | 0.9631 | v5.3 vs. v7.1 | HNU |
| LH_postcentral_surfavg       | ICC3 | 0.963 | 264.86 | 26 | 234 | 5.03E-158 | 0.9446  | 0.9785 | v6.0          | HNU |
| LH_postcentral_surfavg       | ICC2 | 0.977 | 125.47 | 26 | 26  | 2.25E-21  | 0.9258  | 0.9901 | v6.0 vs. v7.1 | HNU |



|                                |      |       |        |    |     |           |         |        |               |     |
|--------------------------------|------|-------|--------|----|-----|-----------|---------|--------|---------------|-----|
| LH_postcentral_surfavg         | ICC3 | 0.958 | 227.37 | 26 | 234 | 1.42E-150 | 0.9360  | 0.9750 | v7.1          | HNU |
| LH_postcentral_thickavg        | ICC3 | 0.873 | 70.03  | 26 | 234 | 2.50E-95  | 0.8161  | 0.9228 | v5.3          | HNU |
| LH_postcentral_thickavg        | ICC2 | 0.552 | 21.45  | 26 | 26  | 8.52E-12  | -0.0386 | 0.8283 | v5.3 vs. v6.0 | HNU |
| LH_postcentral_thickavg        | ICC2 | 0.594 | 28.29  | 26 | 26  | 3.03E-13  | -0.0323 | 0.8522 | v5.3 vs. v7.1 | HNU |
| LH_postcentral_thickavg        | ICC3 | 0.872 | 69.13  | 26 | 234 | 9.38E-95  | 0.8141  | 0.9219 | v6.0          | HNU |
| LH_postcentral_thickavg        | ICC2 | 0.928 | 26.08  | 26 | 26  | 8.12E-13  | 0.8659  | 0.9619 | v6.0 vs. v7.1 | HNU |
| LH_postcentral_thickavg        | ICC3 | 0.880 | 74.08  | 26 | 234 | 7.74E-98  | 0.8246  | 0.9267 | v7.1          | HNU |
| LH_posteriorcingulate_surfavg  | ICC3 | 0.951 | 194.89 | 26 | 234 | 4.28E-143 | 0.9261  | 0.9710 | v5.3          | HNU |
| LH_posteriorcingulate_surfavg  | ICC2 | 0.973 | 70.76  | 26 | 26  | 3.33E-18  | 0.9488  | 0.9860 | v5.3 vs. v6.0 | HNU |
| LH_posteriorcingulate_surfavg  | ICC2 | 0.948 | 42.25  | 26 | 26  | 2.17E-15  | 0.8948  | 0.9733 | v5.3 vs. v7.1 | HNU |
| LH_posteriorcingulate_surfavg  | ICC3 | 0.974 | 377.62 | 26 | 234 | 1.70E-175 | 0.9606  | 0.9848 | v6.0          | HNU |
| LH_posteriorcingulate_surfavg  | ICC2 | 0.966 | 70.90  | 26 | 26  | 3.24E-18  | 0.9226  | 0.9835 | v6.0 vs. v7.1 | HNU |
| LH_posteriorcingulate_surfavg  | ICC3 | 0.977 | 420.62 | 26 | 234 | 7.64E-181 | 0.9645  | 0.9864 | v7.1          | HNU |
| LH_posteriorcingulate_thickavg | ICC3 | 0.650 | 19.55  | 26 | 234 | 6.34E-45  | 0.5385  | 0.7655 | v5.3          | HNU |
| LH_posteriorcingulate_thickavg | ICC2 | 0.765 | 7.62   | 26 | 26  | 9.24E-07  | 0.5946  | 0.8703 | v5.3 vs. v6.0 | HNU |
| LH_posteriorcingulate_thickavg | ICC2 | 0.628 | 7.36   | 26 | 26  | 1.31E-06  | 0.1572  | 0.8255 | v5.3 vs. v7.1 | HNU |
| LH_posteriorcingulate_thickavg | ICC3 | 0.655 | 19.96  | 26 | 234 | 1.31E-45  | 0.5441  | 0.7693 | v6.0          | HNU |
| LH_posteriorcingulate_thickavg | ICC2 | 0.622 | 20.85  | 26 | 26  | 1.20E-11  | -0.0406 | 0.8614 | v6.0 vs. v7.1 | HNU |
| LH_posteriorcingulate_thickavg | ICC3 | 0.700 | 24.34  | 26 | 234 | 1.82E-52  | 0.5963  | 0.8035 | v7.1          | HNU |
| LH_precentral_surfavg          | ICC3 | 0.974 | 371.60 | 26 | 234 | 1.06E-174 | 0.9600  | 0.9846 | v5.3          | HNU |
| LH_precentral_surfavg          | ICC2 | 0.933 | 40.16  | 26 | 26  | 4.06E-15  | 0.8197  | 0.9698 | v5.3 vs. v6.0 | HNU |
| LH_precentral_surfavg          | ICC2 | 0.929 | 30.62  | 26 | 26  | 1.15E-13  | 0.8600  | 0.9635 | v5.3 vs. v7.1 | HNU |
| LH_precentral_surfavg          | ICC3 | 0.972 | 348.30 | 26 | 234 | 1.69E-171 | 0.9574  | 0.9836 | v6.0          | HNU |
| LH_precentral_surfavg          | ICC2 | 0.986 | 153.12 | 26 | 26  | 1.75E-22  | 0.9717  | 0.9927 | v6.0 vs. v7.1 | HNU |
| LH_precentral_surfavg          | ICC3 | 0.973 | 358.99 | 26 | 234 | 5.41E-173 | 0.9586  | 0.9840 | v7.1          | HNU |
| LH_precentral_thickavg         | ICC3 | 0.816 | 45.41  | 26 | 234 | 1.15E-76  | 0.7398  | 0.8852 | v5.3          | HNU |
| LH_precentral_thickavg         | ICC2 | 0.583 | 20.22  | 26 | 26  | 1.72E-11  | -0.0420 | 0.8430 | v5.3 vs. v6.0 | HNU |
| LH_precentral_thickavg         | ICC2 | 0.554 | 13.06  | 26 | 26  | 2.74E-09  | -0.0517 | 0.8207 | v5.3 vs. v7.1 | HNU |
| LH_precentral_thickavg         | ICC3 | 0.792 | 39.10  | 26 | 234 | 1.53E-70  | 0.7088  | 0.8689 | v6.0          | HNU |
| LH_precentral_thickavg         | ICC2 | 0.890 | 16.93  | 26 | 26  | 1.39E-10  | 0.7990  | 0.9412 | v6.0 vs. v7.1 | HNU |
| LH_precentral_thickavg         | ICC3 | 0.806 | 42.53  | 26 | 234 | 5.84E-74  | 0.7265  | 0.8783 | v7.1          | HNU |
| LH_precuneus_surfavg           | ICC3 | 0.977 | 423.77 | 26 | 234 | 3.27E-181 | 0.9647  | 0.9865 | v5.3          | HNU |
| LH_precuneus_surfavg           | ICC2 | 0.967 | 68.54  | 26 | 26  | 4.98E-18  | 0.9314  | 0.9834 | v5.3 vs. v6.0 | HNU |
| LH_precuneus_surfavg           | ICC2 | 0.967 | 66.98  | 26 | 26  | 6.65E-18  | 0.9322  | 0.9831 | v5.3 vs. v7.1 | HNU |
| LH_precuneus_surfavg           | ICC3 | 0.983 | 571.26 | 26 | 234 | 4.36E-196 | 0.9736  | 0.9899 | v6.0          | HNU |
| LH_precuneus_surfavg           | ICC2 | 0.992 | 250.92 | 26 | 26  | 3.02E-25  | 0.9853  | 0.9960 | v6.0 vs. v7.1 | HNU |
| LH_precuneus_surfavg           | ICC3 | 0.988 | 843.41 | 26 | 234 | 1.33E-215 | 0.9820  | 0.9932 | v7.1          | HNU |
| LH_precuneus_thickavg          | ICC3 | 0.749 | 30.81  | 26 | 234 | 3.52E-61  | 0.6547  | 0.8388 | v5.3          | HNU |
| LH_precuneus_thickavg          | ICC2 | 0.556 | 11.44  | 26 | 26  | 1.20E-08  | -0.0504 | 0.8178 | v5.3 vs. v6.0 | HNU |
| LH_precuneus_thickavg          | ICC2 | 0.772 | 14.69  | 26 | 26  | 7.19E-10  | 0.2776  | 0.9064 | v5.3 vs. v7.1 | HNU |
| LH_precuneus_thickavg          | ICC3 | 0.793 | 39.23  | 26 | 234 | 1.12E-70  | 0.7095  | 0.8693 | v6.0          | HNU |
| LH_precuneus_thickavg          | ICC2 | 0.716 | 9.64   | 26 | 26  | 7.75E-08  | 0.3019  | 0.8698 | v6.0 vs. v7.1 | HNU |
| LH_precuneus_thickavg          | ICC3 | 0.778 | 36.02  | 26 | 234 | 2.92E-67  | 0.6908  | 0.8591 | v7.1          | HNU |
| LH_Putamen                     | ICC3 | 0.879 | 73.88  | 26 | 234 | 1.02E-97  | 0.8242  | 0.9266 | v5.3          | HNU |

|                                      |      |       |         |    |     |           |         |        |               |     |
|--------------------------------------|------|-------|---------|----|-----|-----------|---------|--------|---------------|-----|
| LH_Putamen                           | ICC2 | 0.284 | 21.14   | 26 | 26  | 1.01E-11  | -0.0161 | 0.6219 | v5.3 vs. v6.0 | HNU |
| LH_Putamen                           | ICC2 | 0.298 | 18.22   | 26 | 26  | 5.87E-11  | -0.0202 | 0.6361 | v5.3 vs. v7.1 | HNU |
| LH_Putamen                           | ICC3 | 0.842 | 54.12   | 26 | 234 | 4.47E-84  | 0.7731  | 0.9021 | v6.0          | HNU |
| LH_Putamen                           | ICC2 | 0.977 | 89.70   | 26 | 26  | 1.63E-19  | 0.9556  | 0.9880 | v6.0 vs. v7.1 | HNU |
| LH_Putamen                           | ICC3 | 0.960 | 240.73  | 26 | 234 | 2.34E-153 | 0.9394  | 0.9764 | v7.1          | HNU |
| LH_rostralanteriorcingulate_surfavg  | ICC3 | 0.920 | 115.89  | 26 | 234 | 2.42E-118 | 0.8811  | 0.9520 | v5.3          | HNU |
| LH_rostralanteriorcingulate_surfavg  | ICC2 | 0.908 | 20.08   | 26 | 26  | 1.87E-11  | 0.8301  | 0.9514 | v5.3 vs. v6.0 | HNU |
| LH_rostralanteriorcingulate_surfavg  | ICC2 | 0.885 | 15.96   | 26 | 26  | 2.76E-10  | 0.7895  | 0.9385 | v5.3 vs. v7.1 | HNU |
| LH_rostralanteriorcingulate_surfavg  | ICC3 | 0.920 | 116.21  | 26 | 234 | 1.79E-118 | 0.8814  | 0.9522 | v6.0          | HNU |
| LH_rostralanteriorcingulate_surfavg  | ICC2 | 0.951 | 39.39   | 26 | 26  | 5.17E-15  | 0.9083  | 0.9743 | v6.0 vs. v7.1 | HNU |
| LH_rostralanteriorcingulate_surfavg  | ICC3 | 0.952 | 199.52  | 26 | 234 | 3.13E-144 | 0.9277  | 0.9716 | v7.1          | HNU |
| LH_rostralanteriorcingulate_thickavg | ICC3 | 0.567 | 14.07   | 26 | 234 | 1.09E-34  | 0.4481  | 0.6990 | v5.3          | HNU |
| LH_rostralanteriorcingulate_thickavg | ICC2 | 0.637 | 5.06    | 26 | 26  | 4.77E-05  | 0.3916  | 0.7953 | v5.3 vs. v6.0 | HNU |
| LH_rostralanteriorcingulate_thickavg | ICC2 | 0.648 | 5.41    | 26 | 26  | 2.62E-05  | 0.3963  | 0.8040 | v5.3 vs. v7.1 | HNU |
| LH_rostralanteriorcingulate_thickavg | ICC3 | 0.621 | 17.37   | 26 | 234 | 4.44E-41  | 0.5063  | 0.7429 | v6.0          | HNU |
| LH_rostralanteriorcingulate_thickavg | ICC2 | 0.668 | 15.42   | 26 | 26  | 4.11E-10  | -0.0122 | 0.8747 | v6.0 vs. v7.1 | HNU |
| LH_rostralanteriorcingulate_thickavg | ICC3 | 0.672 | 21.51   | 26 | 234 | 3.79E-48  | 0.5641  | 0.7827 | v7.1          | HNU |
| LH_rostralmiddlefrontal_surfavg      | ICC3 | 0.980 | 484.86  | 26 | 234 | 6.56E-188 | 0.9691  | 0.9881 | v5.3          | HNU |
| LH_rostralmiddlefrontal_surfavg      | ICC2 | 0.889 | 20.92   | 26 | 26  | 1.15E-11  | 0.7624  | 0.9448 | v5.3 vs. v6.0 | HNU |
| LH_rostralmiddlefrontal_surfavg      | ICC2 | 0.903 | 29.89   | 26 | 26  | 1.54E-13  | 0.7037  | 0.9581 | v5.3 vs. v7.1 | HNU |
| LH_rostralmiddlefrontal_surfavg      | ICC3 | 0.991 | 1096.17 | 26 | 234 | 8.72E-229 | 0.9861  | 0.9947 | v6.0          | HNU |
| LH_rostralmiddlefrontal_surfavg      | ICC2 | 0.992 | 270.01  | 26 | 26  | 1.17E-25  | 0.9846  | 0.9959 | v6.0 vs. v7.1 | HNU |
| LH_rostralmiddlefrontal_surfavg      | ICC3 | 0.992 | 1265.38 | 26 | 234 | 5.10E-236 | 0.9879  | 0.9954 | v7.1          | HNU |
| LH_rostralmiddlefrontal_thickavg     | ICC3 | 0.712 | 25.72   | 26 | 234 | 1.83E-54  | 0.6104  | 0.8123 | v5.3          | HNU |
| LH_rostralmiddlefrontal_thickavg     | ICC2 | 0.546 | 8.04    | 26 | 26  | 5.29E-07  | -0.0263 | 0.7990 | v5.3 vs. v6.0 | HNU |
| LH_rostralmiddlefrontal_thickavg     | ICC2 | 0.667 | 8.70    | 26 | 26  | 2.32E-07  | 0.1837  | 0.8496 | v5.3 vs. v7.1 | HNU |
| LH_rostralmiddlefrontal_thickavg     | ICC3 | 0.765 | 33.53   | 26 | 234 | 1.90E-64  | 0.6746  | 0.8501 | v6.0          | HNU |
| LH_rostralmiddlefrontal_thickavg     | ICC2 | 0.760 | 8.60    | 26 | 26  | 2.62E-07  | 0.5561  | 0.8723 | v6.0 vs. v7.1 | HNU |
| LH_rostralmiddlefrontal_thickavg     | ICC3 | 0.699 | 24.25   | 26 | 234 | 2.46E-52  | 0.5954  | 0.8029 | v7.1          | HNU |
| LH_superiorfrontal_surfavg           | ICC3 | 0.986 | 706.55  | 26 | 234 | 1.01E-206 | 0.9786  | 0.9918 | v5.3          | HNU |
| LH_superiorfrontal_surfavg           | ICC2 | 0.970 | 151.35  | 26 | 26  | 2.03E-22  | 0.7795  | 0.9900 | v5.3 vs. v6.0 | HNU |
| LH_superiorfrontal_surfavg           | ICC2 | 0.939 | 101.59  | 26 | 26  | 3.35E-20  | 0.4053  | 0.9811 | v5.3 vs. v7.1 | HNU |
| LH_superiorfrontal_surfavg           | ICC3 | 0.991 | 1152.79 | 26 | 234 | 2.53E-231 | 0.9868  | 0.9950 | v6.0          | HNU |
| LH_superiorfrontal_surfavg           | ICC2 | 0.989 | 380.20  | 26 | 26  | 1.41E-27  | 0.9154  | 0.9961 | v6.0 vs. v7.1 | HNU |
| LH_superiorfrontal_surfavg           | ICC3 | 0.991 | 1101.93 | 26 | 234 | 4.75E-229 | 0.9862  | 0.9948 | v7.1          | HNU |
| LH_superiorfrontal_thickavg          | ICC3 | 0.852 | 58.47   | 26 | 234 | 2.08E-87  | 0.7867  | 0.9088 | v5.3          | HNU |
| LH_superiorfrontal_thickavg          | ICC2 | 0.672 | 12.87   | 26 | 26  | 3.24E-09  | 0.0268  | 0.8704 | v5.3 vs. v6.0 | HNU |
| LH_superiorfrontal_thickavg          | ICC2 | 0.818 | 14.47   | 26 | 26  | 8.52E-10  | 0.5443  | 0.9161 | v5.3 vs. v7.1 | HNU |
| LH_superiorfrontal_thickavg          | ICC3 | 0.867 | 66.12   | 26 | 234 | 8.70E-93  | 0.8071  | 0.9186 | v6.0          | HNU |
| LH_superiorfrontal_thickavg          | ICC2 | 0.837 | 17.93   | 26 | 26  | 7.12E-11  | 0.5240  | 0.9295 | v6.0 vs. v7.1 | HNU |
| LH_superiorfrontal_thickavg          | ICC3 | 0.827 | 48.82   | 26 | 234 | 1.06E-79  | 0.7539  | 0.8925 | v7.1          | HNU |
| LH_superiorparietal_surfavg          | ICC3 | 0.975 | 385.47  | 26 | 234 | 1.63E-176 | 0.9614  | 0.9851 | v5.3          | HNU |
| LH_superiorparietal_surfavg          | ICC2 | 0.940 | 45.08   | 26 | 26  | 9.63E-16  | 0.8351  | 0.9730 | v5.3 vs. v6.0 | HNU |
| LH_superiorparietal_surfavg          | ICC2 | 0.921 | 44.97   | 26 | 26  | 9.94E-16  | 0.6522  | 0.9697 | v5.3 vs. v7.1 | HNU |

|                              |      |       |         |    |     |           |         |        |               |     |
|------------------------------|------|-------|---------|----|-----|-----------|---------|--------|---------------|-----|
| LH_superiorparietal_surfavg  | ICC3 | 0.989 | 890.92  | 26 | 234 | 2.35E-218 | 0.9829  | 0.9935 | v6.0          | HNU |
| LH_superiorparietal_surfavg  | ICC2 | 0.991 | 385.20  | 26 | 26  | 1.19E-27  | 0.9608  | 0.9966 | v6.0 vs. v7.1 | HNU |
| LH_superiorparietal_surfavg  | ICC3 | 0.986 | 721.95  | 26 | 234 | 8.41E-208 | 0.9790  | 0.9920 | v7.1          | HNU |
| LH_superiorparietal_thickavg | ICC3 | 0.846 | 55.93   | 26 | 234 | 1.72E-85  | 0.7790  | 0.9050 | v5.3          | HNU |
| LH_superiorparietal_thickavg | ICC2 | 0.598 | 19.67   | 26 | 26  | 2.39E-11  | -0.0427 | 0.8499 | v5.3 vs. v6.0 | HNU |
| LH_superiorparietal_thickavg | ICC2 | 0.611 | 17.95   | 26 | 26  | 6.99E-11  | -0.0434 | 0.8543 | v5.3 vs. v7.1 | HNU |
| LH_superiorparietal_thickavg | ICC3 | 0.845 | 55.57   | 26 | 234 | 3.29E-85  | 0.7778  | 0.9044 | v6.0          | HNU |
| LH_superiorparietal_thickavg | ICC2 | 0.855 | 12.49   | 26 | 26  | 4.51E-09  | 0.7385  | 0.9220 | v6.0 vs. v7.1 | HNU |
| LH_superiorparietal_thickavg | ICC3 | 0.777 | 35.87   | 26 | 234 | 4.28E-67  | 0.6899  | 0.8586 | v7.1          | HNU |
| LH_superiortemporal_surfavg  | ICC3 | 0.965 | 272.81  | 26 | 234 | 1.78E-159 | 0.9462  | 0.9791 | v5.3          | HNU |
| LH_superiortemporal_surfavg  | ICC2 | 0.876 | 45.77   | 26 | 26  | 7.98E-16  | 0.2190  | 0.9595 | v5.3 vs. v6.0 | HNU |
| LH_superiortemporal_surfavg  | ICC2 | 0.810 | 62.36   | 26 | 26  | 1.64E-17  | 0.0020  | 0.9427 | v5.3 vs. v7.1 | HNU |
| LH_superiortemporal_surfavg  | ICC3 | 0.971 | 336.33  | 26 | 234 | 9.01E-170 | 0.9559  | 0.9830 | v6.0          | HNU |
| LH_superiortemporal_surfavg  | ICC2 | 0.974 | 255.25  | 26 | 26  | 2.42E-25  | 0.6280  | 0.9922 | v6.0 vs. v7.1 | HNU |
| LH_superiortemporal_surfavg  | ICC3 | 0.984 | 630.38  | 26 | 234 | 5.21E-201 | 0.9760  | 0.9909 | v7.1          | HNU |
| LH_superiortemporal_thickavg | ICC3 | 0.798 | 40.40   | 26 | 234 | 7.27E-72  | 0.7157  | 0.8727 | v5.3          | HNU |
| LH_superiortemporal_thickavg | ICC2 | 0.726 | 17.07   | 26 | 26  | 1.27E-10  | 0.0490  | 0.8979 | v5.3 vs. v6.0 | HNU |
| LH_superiortemporal_thickavg | ICC2 | 0.846 | 12.91   | 26 | 26  | 3.11E-09  | 0.7208  | 0.9177 | v5.3 vs. v7.1 | HNU |
| LH_superiortemporal_thickavg | ICC3 | 0.837 | 52.32   | 26 | 234 | 1.26E-82  | 0.7669  | 0.8990 | v6.0          | HNU |
| LH_superiortemporal_thickavg | ICC2 | 0.752 | 12.41   | 26 | 26  | 4.85E-09  | 0.2946  | 0.8936 | v6.0 vs. v7.1 | HNU |
| LH_superiortemporal_thickavg | ICC3 | 0.782 | 36.79   | 26 | 234 | 4.23E-68  | 0.6955  | 0.8617 | v7.1          | HNU |
| LH_supramarginal_surfavg     | ICC3 | 0.976 | 415.58  | 26 | 234 | 3.03E-180 | 0.9641  | 0.9862 | v5.3          | HNU |
| LH_supramarginal_surfavg     | ICC2 | 0.820 | 27.21   | 26 | 26  | 4.87E-13  | 0.1640  | 0.9371 | v5.3 vs. v6.0 | HNU |
| LH_supramarginal_surfavg     | ICC2 | 0.787 | 24.81   | 26 | 26  | 1.48E-12  | 0.0828  | 0.9257 | v5.3 vs. v7.1 | HNU |
| LH_supramarginal_surfavg     | ICC3 | 0.992 | 1194.70 | 26 | 234 | 4.02E-233 | 0.9872  | 0.9952 | v6.0          | HNU |
| LH_supramarginal_surfavg     | ICC2 | 0.993 | 380.12  | 26 | 26  | 1.41E-27  | 0.9784  | 0.9968 | v6.0 vs. v7.1 | HNU |
| LH_supramarginal_surfavg     | ICC3 | 0.992 | 1189.35 | 26 | 234 | 6.77E-233 | 0.9872  | 0.9951 | v7.1          | HNU |
| LH_supramarginal_thickavg    | ICC3 | 0.788 | 38.24   | 26 | 234 | 1.19E-69  | 0.7040  | 0.8663 | v5.3          | HNU |
| LH_supramarginal_thickavg    | ICC2 | 0.588 | 7.23    | 26 | 26  | 1.57E-06  | 0.0650  | 0.8104 | v5.3 vs. v6.0 | HNU |
| LH_supramarginal_thickavg    | ICC2 | 0.817 | 12.80   | 26 | 26  | 3.44E-09  | 0.6073  | 0.9093 | v5.3 vs. v7.1 | HNU |
| LH_supramarginal_thickavg    | ICC3 | 0.806 | 42.53   | 26 | 234 | 5.78E-74  | 0.7265  | 0.8783 | v6.0          | HNU |
| LH_supramarginal_thickavg    | ICC2 | 0.721 | 8.72    | 26 | 26  | 2.27E-07  | 0.3925  | 0.8639 | v6.0 vs. v7.1 | HNU |
| LH_supramarginal_thickavg    | ICC3 | 0.759 | 32.49   | 26 | 234 | 3.22E-63  | 0.6673  | 0.8459 | v7.1          | HNU |
| LH_SurfArea                  | ICC3 | 0.990 | 996.24  | 26 | 234 | 5.65E-224 | 0.9847  | 0.9942 | v5.3          | HNU |
| LH_SurfArea                  | ICC2 | 0.974 | 678.39  | 26 | 26  | 7.79E-31  | 0.2670  | 0.9931 | v5.3 vs. v6.0 | HNU |
| LH_SurfArea                  | ICC2 | 0.928 | 405.64  | 26 | 26  | 6.09E-28  | 0.0618  | 0.9811 | v5.3 vs. v7.1 | HNU |
| LH_SurfArea                  | ICC3 | 0.994 | 1558.86 | 26 | 234 | 1.52E-246 | 0.9902  | 0.9963 | v6.0          | HNU |
| LH_SurfArea                  | ICC2 | 0.985 | 1076.30 | 26 | 26  | 1.96E-33  | 0.4504  | 0.9962 | v6.0 vs. v7.1 | HNU |
| LH_SurfArea                  | ICC3 | 0.994 | 1646.95 | 26 | 234 | 2.55E-249 | 0.9907  | 0.9965 | v7.1          | HNU |
| LH_temporalpole_surfavg      | ICC3 | 0.670 | 21.27   | 26 | 234 | 9.36E-48  | 0.5611  | 0.7807 | v5.3          | HNU |
| LH_temporalpole_surfavg      | ICC2 | 0.536 | 3.28    | 26 | 26  | 1.78E-03  | 0.2644  | 0.7294 | v5.3 vs. v6.0 | HNU |
| LH_temporalpole_surfavg      | ICC2 | 0.437 | 3.08    | 26 | 26  | 2.81E-03  | 0.1301  | 0.6644 | v5.3 vs. v7.1 | HNU |
| LH_temporalpole_surfavg      | ICC3 | 0.815 | 45.09   | 26 | 234 | 2.25E-76  | 0.7383  | 0.8845 | v6.0          | HNU |
| LH_temporalpole_surfavg      | ICC2 | 0.611 | 6.73    | 26 | 26  | 3.23E-06  | 0.1572  | 0.8127 | v6.0 vs. v7.1 | HNU |

|                                |      |       |        |    |     |           |         |        |               |     |
|--------------------------------|------|-------|--------|----|-----|-----------|---------|--------|---------------|-----|
| LH_temporalpole_surfavg        | ICC3 | 0.846 | 55.87  | 26 | 234 | 1.91E-85  | 0.7788  | 0.9049 | v7.1          | HNU |
| LH_temporalpole_thickavg       | ICC3 | 0.407 | 7.87   | 26 | 234 | 3.84E-20  | 0.2906  | 0.5563 | v5.3          | HNU |
| LH_temporalpole_thickavg       | ICC2 | 0.756 | 8.06   | 26 | 26  | 5.14E-07  | 0.5669  | 0.8677 | v5.3 vs. v6.0 | HNU |
| LH_temporalpole_thickavg       | ICC2 | 0.826 | 10.34  | 26 | 26  | 3.66E-08  | 0.6905  | 0.9055 | v5.3 vs. v7.1 | HNU |
| LH_temporalpole_thickavg       | ICC3 | 0.405 | 7.79   | 26 | 234 | 5.98E-20  | 0.2883  | 0.5538 | v6.0          | HNU |
| LH_temporalpole_thickavg       | ICC2 | 0.841 | 17.49  | 26 | 26  | 9.48E-11  | 0.5672  | 0.9293 | v6.0 vs. v7.1 | HNU |
| LH_temporalpole_thickavg       | ICC3 | 0.391 | 7.42   | 26 | 234 | 6.05E-19  | 0.2758  | 0.5407 | v7.1          | HNU |
| LH_Thalamus                    | ICC3 | 0.857 | 60.69  | 26 | 234 | 5.03E-89  | 0.7931  | 0.9119 | v5.3          | HNU |
| LH_Thalamus                    | ICC2 | 0.844 | 25.06  | 26 | 26  | 1.32E-12  | 0.3440  | 0.9415 | v5.3 vs. v6.0 | HNU |
| LH_Thalamus                    | ICC2 | 0.700 | 16.02  | 26 | 26  | 2.63E-10  | 0.0197  | 0.8875 | v5.3 vs. v7.1 | HNU |
| LH_Thalamus                    | ICC3 | 0.918 | 113.51 | 26 | 234 | 2.26E-117 | 0.8789  | 0.9511 | v6.0          | HNU |
| LH_Thalamus                    | ICC2 | 0.915 | 47.37  | 26 | 26  | 5.20E-16  | 0.5555  | 0.9692 | v6.0 vs. v7.1 | HNU |
| LH_Thalamus                    | ICC3 | 0.899 | 89.75  | 26 | 234 | 1.63E-106 | 0.8511  | 0.9388 | v7.1          | HNU |
| LH_Thickness                   | ICC3 | 0.777 | 35.75  | 26 | 234 | 5.85E-67  | 0.6891  | 0.8582 | v5.3          | HNU |
| LH_Thickness                   | ICC2 | 0.467 | 8.60   | 26 | 26  | 2.62E-07  | -0.0616 | 0.7607 | v5.3 vs. v6.0 | HNU |
| LH_Thickness                   | ICC2 | 0.721 | 10.12  | 26 | 26  | 4.60E-08  | 0.2909  | 0.8742 | v5.3 vs. v7.1 | HNU |
| LH_Thickness                   | ICC3 | 0.822 | 47.24  | 26 | 234 | 2.57E-78  | 0.7476  | 0.8893 | v6.0          | HNU |
| LH_Thickness                   | ICC2 | 0.657 | 8.35   | 26 | 26  | 3.58E-07  | 0.1754  | 0.8438 | v6.0 vs. v7.1 | HNU |
| LH_Thickness                   | ICC3 | 0.759 | 32.42  | 26 | 234 | 3.83E-63  | 0.6668  | 0.8457 | v7.1          | HNU |
| LH_transversetemporal_surfavg  | ICC3 | 0.948 | 183.16 | 26 | 234 | 4.24E-140 | 0.9217  | 0.9692 | v5.3          | HNU |
| LH_transversetemporal_surfavg  | ICC2 | 0.930 | 29.31  | 26 | 26  | 1.97E-13  | 0.8669  | 0.9631 | v5.3 vs. v6.0 | HNU |
| LH_transversetemporal_surfavg  | ICC2 | 0.923 | 24.21  | 26 | 26  | 2.00E-12  | 0.8568  | 0.9594 | v5.3 vs. v7.1 | HNU |
| LH_transversetemporal_surfavg  | ICC3 | 0.952 | 198.46 | 26 | 234 | 5.68E-144 | 0.9273  | 0.9715 | v6.0          | HNU |
| LH_transversetemporal_surfavg  | ICC2 | 0.967 | 84.00  | 26 | 26  | 3.77E-19  | 0.9021  | 0.9854 | v6.0 vs. v7.1 | HNU |
| LH_transversetemporal_surfavg  | ICC3 | 0.970 | 319.57 | 26 | 234 | 2.98E-167 | 0.9537  | 0.9821 | v7.1          | HNU |
| LH_transversetemporal_thickavg | ICC3 | 0.840 | 53.54  | 26 | 234 | 1.28E-83  | 0.7712  | 0.9011 | v5.3          | HNU |
| LH_transversetemporal_thickavg | ICC2 | 0.771 | 26.44  | 26 | 26  | 6.90E-13  | 0.0325  | 0.9219 | v5.3 vs. v6.0 | HNU |
| LH_transversetemporal_thickavg | ICC2 | 0.855 | 24.93  | 26 | 26  | 1.40E-12  | 0.4298  | 0.9440 | v5.3 vs. v7.1 | HNU |
| LH_transversetemporal_thickavg | ICC3 | 0.837 | 52.40  | 26 | 234 | 1.07E-82  | 0.7672  | 0.8992 | v6.0          | HNU |
| LH_transversetemporal_thickavg | ICC2 | 0.928 | 38.93  | 26 | 26  | 5.97E-15  | 0.7955  | 0.9685 | v6.0 vs. v7.1 | HNU |
| LH_transversetemporal_thickavg | ICC3 | 0.827 | 48.68  | 26 | 234 | 1.40E-79  | 0.7534  | 0.8922 | v7.1          | HNU |
| RH_Accumbens                   | ICC3 | 0.608 | 16.51  | 26 | 234 | 1.73E-39  | 0.4924  | 0.7327 | v5.3          | HNU |
| RH_Accumbens                   | ICC2 | 0.485 | 6.67   | 26 | 26  | 3.48E-06  | -0.0447 | 0.7590 | v5.3 vs. v6.0 | HNU |
| RH_Accumbens                   | ICC2 | 0.581 | 5.28   | 26 | 26  | 3.24E-05  | 0.2111  | 0.7805 | v5.3 vs. v7.1 | HNU |
| RH_Accumbens                   | ICC3 | 0.718 | 26.42  | 26 | 234 | 1.95E-55  | 0.6172  | 0.8164 | v6.0          | HNU |
| RH_Accumbens                   | ICC2 | 0.729 | 7.70   | 26 | 26  | 8.21E-07  | 0.4943  | 0.8563 | v6.0 vs. v7.1 | HNU |
| RH_Accumbens                   | ICC3 | 0.750 | 30.97  | 26 | 234 | 2.20E-61  | 0.6560  | 0.8395 | v7.1          | HNU |
| RH_Amygdala                    | ICC3 | 0.634 | 18.32  | 26 | 234 | 8.63E-43  | 0.5209  | 0.7533 | v5.3          | HNU |
| RH_Amygdala                    | ICC2 | 0.655 | 5.74   | 26 | 26  | 1.48E-05  | 0.3929  | 0.8115 | v5.3 vs. v6.0 | HNU |
| RH_Amygdala                    | ICC2 | 0.648 | 5.99   | 26 | 26  | 9.96E-06  | 0.3491  | 0.8131 | v5.3 vs. v7.1 | HNU |
| RH_Amygdala                    | ICC3 | 0.778 | 36.11  | 26 | 234 | 2.29E-67  | 0.6914  | 0.8595 | v6.0          | HNU |
| RH_Amygdala                    | ICC2 | 0.832 | 10.57  | 26 | 26  | 2.88E-08  | 0.6990  | 0.9094 | v6.0 vs. v7.1 | HNU |
| RH_Amygdala                    | ICC3 | 0.699 | 24.18  | 26 | 234 | 3.04E-52  | 0.5947  | 0.8025 | v7.1          | HNU |
| RH_bankssts_surfavg            | ICC3 | 0.883 | 76.73  | 26 | 234 | 2.06E-99  | 0.8297  | 0.9291 | v5.3          | HNU |

|                                     |      |       |        |    |     |           |         |        |               |     |
|-------------------------------------|------|-------|--------|----|-----|-----------|---------|--------|---------------|-----|
| RH_bankssts_surfavg                 | ICC2 | 0.621 | 8.07   | 26 | 26  | 5.08E-07  | 0.0908  | 0.8297 | v5.3 vs. v6.0 | HNU |
| RH_bankssts_surfavg                 | ICC2 | 0.578 | 5.22   | 26 | 26  | 3.61E-05  | 0.2082  | 0.7782 | v5.3 vs. v7.1 | HNU |
| RH_bankssts_surfavg                 | ICC3 | 0.890 | 82.17  | 26 | 234 | 1.67E-102 | 0.8394  | 0.9335 | v6.0          | HNU |
| RH_bankssts_surfavg                 | ICC2 | 0.921 | 24.69  | 26 | 26  | 1.58E-12  | 0.8543  | 0.9582 | v6.0 vs. v7.1 | HNU |
| RH_bankssts_surfavg                 | ICC3 | 0.894 | 85.21  | 26 | 234 | 3.75E-104 | 0.8443  | 0.9358 | v7.1          | HNU |
| RH_bankssts_thickavg                | ICC3 | 0.750 | 30.94  | 26 | 234 | 2.41E-61  | 0.6558  | 0.8394 | v5.3          | HNU |
| RH_bankssts_thickavg                | ICC2 | 0.810 | 10.46  | 26 | 26  | 3.22E-08  | 0.6575  | 0.8979 | v5.3 vs. v6.0 | HNU |
| RH_bankssts_thickavg                | ICC2 | 0.782 | 7.90   | 26 | 26  | 6.32E-07  | 0.6165  | 0.8809 | v5.3 vs. v7.1 | HNU |
| RH_bankssts_thickavg                | ICC3 | 0.802 | 41.51  | 26 | 234 | 5.75E-73  | 0.7214  | 0.8757 | v6.0          | HNU |
| RH_bankssts_thickavg                | ICC2 | 0.883 | 21.15  | 26 | 26  | 1.01E-11  | 0.7280  | 0.9442 | v6.0 vs. v7.1 | HNU |
| RH_bankssts_thickavg                | ICC3 | 0.772 | 34.89  | 26 | 234 | 5.31E-66  | 0.6836  | 0.8552 | v7.1          | HNU |
| RH_caudalanteriorcingulate_surfavg  | ICC3 | 0.958 | 227.53 | 26 | 234 | 1.32E-150 | 0.9361  | 0.9750 | v5.3          | HNU |
| RH_caudalanteriorcingulate_surfavg  | ICC2 | 0.899 | 51.78  | 26 | 26  | 1.71E-16  | 0.3286  | 0.9665 | v5.3 vs. v6.0 | HNU |
| RH_caudalanteriorcingulate_surfavg  | ICC2 | 0.941 | 57.01  | 26 | 26  | 5.09E-17  | 0.7579  | 0.9768 | v5.3 vs. v7.1 | HNU |
| RH_caudalanteriorcingulate_surfavg  | ICC3 | 0.966 | 282.91 | 26 | 234 | 2.94E-161 | 0.9480  | 0.9798 | v6.0          | HNU |
| RH_caudalanteriorcingulate_surfavg  | ICC2 | 0.965 | 73.63  | 26 | 26  | 2.01E-18  | 0.9091  | 0.9837 | v6.0 vs. v7.1 | HNU |
| RH_caudalanteriorcingulate_surfavg  | ICC3 | 0.970 | 327.18 | 26 | 234 | 2.06E-168 | 0.9548  | 0.9825 | v7.1          | HNU |
| RH_caudalanteriorcingulate_thickavg | ICC3 | 0.788 | 38.19  | 26 | 234 | 1.34E-69  | 0.7037  | 0.8662 | v5.3          | HNU |
| RH_caudalanteriorcingulate_thickavg | ICC2 | 0.870 | 18.28  | 26 | 26  | 5.67E-11  | 0.7142  | 0.9363 | v5.3 vs. v6.0 | HNU |
| RH_caudalanteriorcingulate_thickavg | ICC2 | 0.836 | 12.03  | 26 | 26  | 6.88E-09  | 0.7042  | 0.9120 | v5.3 vs. v7.1 | HNU |
| RH_caudalanteriorcingulate_thickavg | ICC3 | 0.844 | 55.05  | 26 | 234 | 8.38E-85  | 0.7761  | 0.9036 | v6.0          | HNU |
| RH_caudalanteriorcingulate_thickavg | ICC2 | 0.814 | 25.38  | 26 | 26  | 1.13E-12  | 0.1657  | 0.9338 | v6.0 vs. v7.1 | HNU |
| RH_caudalanteriorcingulate_thickavg | ICC3 | 0.855 | 59.93  | 26 | 234 | 1.77E-88  | 0.7910  | 0.9108 | v7.1          | HNU |
| RH_caudalmiddlefrontal_surfavg      | ICC3 | 0.966 | 280.92 | 26 | 234 | 6.54E-161 | 0.9477  | 0.9797 | v5.3          | HNU |
| RH_caudalmiddlefrontal_surfavg      | ICC2 | 0.963 | 51.20  | 26 | 26  | 1.96E-16  | 0.9298  | 0.9806 | v5.3 vs. v6.0 | HNU |
| RH_caudalmiddlefrontal_surfavg      | ICC2 | 0.961 | 49.05  | 26 | 26  | 3.36E-16  | 0.9269  | 0.9798 | v5.3 vs. v7.1 | HNU |
| RH_caudalmiddlefrontal_surfavg      | ICC3 | 0.984 | 602.19 | 26 | 234 | 1.01E-198 | 0.9750  | 0.9904 | v6.0          | HNU |
| RH_caudalmiddlefrontal_surfavg      | ICC2 | 0.985 | 127.77 | 26 | 26  | 1.78E-21  | 0.9712  | 0.9922 | v6.0 vs. v7.1 | HNU |
| RH_caudalmiddlefrontal_surfavg      | ICC3 | 0.978 | 445.57 | 26 | 234 | 1.05E-183 | 0.9664  | 0.9871 | v7.1          | HNU |
| RH_caudalmiddlefrontal_thickavg     | ICC3 | 0.834 | 51.32  | 26 | 234 | 8.20E-82  | 0.7634  | 0.8973 | v5.3          | HNU |
| RH_caudalmiddlefrontal_thickavg     | ICC2 | 0.721 | 24.74  | 26 | 26  | 1.54E-12  | -0.0147 | 0.9038 | v5.3 vs. v6.0 | HNU |
| RH_caudalmiddlefrontal_thickavg     | ICC2 | 0.737 | 12.88  | 26 | 26  | 3.21E-09  | 0.2068  | 0.8915 | v5.3 vs. v7.1 | HNU |
| RH_caudalmiddlefrontal_thickavg     | ICC3 | 0.868 | 66.84  | 26 | 234 | 2.91E-93  | 0.8089  | 0.9194 | v6.0          | HNU |
| RH_caudalmiddlefrontal_thickavg     | ICC2 | 0.856 | 15.05  | 26 | 26  | 5.41E-10  | 0.7196  | 0.9257 | v6.0 vs. v7.1 | HNU |
| RH_caudalmiddlefrontal_thickavg     | ICC3 | 0.845 | 55.38  | 26 | 234 | 4.62E-85  | 0.7772  | 0.9041 | v7.1          | HNU |
| RH_Caudate                          | ICC3 | 0.936 | 147.10 | 26 | 234 | 1.34E-129 | 0.9042  | 0.9619 | v5.3          | HNU |
| RH_Caudate                          | ICC2 | 0.828 | 51.96  | 26 | 26  | 1.63E-16  | 0.0270  | 0.9469 | v5.3 vs. v6.0 | HNU |
| RH_Caudate                          | ICC2 | 0.888 | 59.32  | 26 | 26  | 3.09E-17  | 0.1845  | 0.9651 | v5.3 vs. v7.1 | HNU |
| RH_Caudate                          | ICC3 | 0.965 | 273.51 | 26 | 234 | 1.33E-159 | 0.9463  | 0.9792 | v6.0          | HNU |
| RH_Caudate                          | ICC2 | 0.976 | 144.00 | 26 | 26  | 3.85E-22  | 0.8854  | 0.9907 | v6.0 vs. v7.1 | HNU |
| RH_Caudate                          | ICC3 | 0.968 | 301.50 | 26 | 234 | 2.19E-164 | 0.9511  | 0.9811 | v7.1          | HNU |
| RH_cuneus_surfavg                   | ICC3 | 0.935 | 145.94 | 26 | 234 | 3.21E-129 | 0.9035  | 0.9616 | v5.3          | HNU |
| RH_cuneus_surfavg                   | ICC2 | 0.884 | 25.61  | 26 | 26  | 1.01E-12  | 0.6430  | 0.9507 | v5.3 vs. v6.0 | HNU |
| RH_cuneus_surfavg                   | ICC2 | 0.761 | 24.13  | 26 | 26  | 2.08E-12  | 0.0328  | 0.9171 | v5.3 vs. v7.1 | HNU |

|                         |      |       |        |    |     |           |         |        |               |     |
|-------------------------|------|-------|--------|----|-----|-----------|---------|--------|---------------|-----|
| RH_cuneus_surfavg       | ICC3 | 0.964 | 269.90 | 26 | 234 | 5.98E-159 | 0.9456  | 0.9789 | v6.0          | HNU |
| RH_cuneus_surfavg       | ICC2 | 0.923 | 73.93  | 26 | 26  | 1.91E-18  | 0.3746  | 0.9754 | v6.0 vs. v7.1 | HNU |
| RH_cuneus_surfavg       | ICC3 | 0.949 | 186.73 | 26 | 234 | 4.98E-141 | 0.9231  | 0.9697 | v7.1          | HNU |
| RH_cuneus_thickavg      | ICC3 | 0.750 | 31.08  | 26 | 234 | 1.63E-61  | 0.6568  | 0.8400 | v5.3          | HNU |
| RH_cuneus_thickavg      | ICC2 | 0.696 | 11.96  | 26 | 26  | 7.34E-09  | 0.1067  | 0.8759 | v5.3 vs. v6.0 | HNU |
| RH_cuneus_thickavg      | ICC2 | 0.747 | 8.43   | 26 | 26  | 3.24E-07  | 0.5170  | 0.8674 | v5.3 vs. v7.1 | HNU |
| RH_cuneus_thickavg      | ICC3 | 0.754 | 31.67  | 26 | 234 | 3.04E-62  | 0.6613  | 0.8426 | v6.0          | HNU |
| RH_cuneus_thickavg      | ICC2 | 0.793 | 10.54  | 26 | 26  | 2.97E-08  | 0.5925  | 0.8930 | v6.0 vs. v7.1 | HNU |
| RH_cuneus_thickavg      | ICC3 | 0.773 | 34.96  | 26 | 234 | 4.44E-66  | 0.6841  | 0.8554 | v7.1          | HNU |
| RH_entorhinal_surfavg   | ICC3 | 0.704 | 24.74  | 26 | 234 | 4.64E-53  | 0.6006  | 0.8061 | v5.3          | HNU |
| RH_entorhinal_surfavg   | ICC2 | 0.408 | 4.08   | 26 | 26  | 3.10E-04  | -0.0187 | 0.6808 | v5.3 vs. v6.0 | HNU |
| RH_entorhinal_surfavg   | ICC2 | 0.459 | 4.08   | 26 | 26  | 3.12E-04  | 0.0544  | 0.7063 | v5.3 vs. v7.1 | HNU |
| RH_entorhinal_surfavg   | ICC3 | 0.758 | 32.32  | 26 | 234 | 5.11E-63  | 0.6660  | 0.8452 | v6.0          | HNU |
| RH_entorhinal_surfavg   | ICC2 | 0.888 | 20.35  | 26 | 26  | 1.59E-11  | 0.7682  | 0.9438 | v6.0 vs. v7.1 | HNU |
| RH_entorhinal_surfavg   | ICC3 | 0.756 | 32.06  | 26 | 234 | 1.03E-62  | 0.6642  | 0.8442 | v7.1          | HNU |
| RH_entorhinal_thickavg  | ICC3 | 0.546 | 13.03  | 26 | 234 | 1.71E-32  | 0.4267  | 0.6817 | v5.3          | HNU |
| RH_entorhinal_thickavg  | ICC2 | 0.708 | 5.93   | 26 | 26  | 1.10E-05  | 0.5074  | 0.8361 | v5.3 vs. v6.0 | HNU |
| RH_entorhinal_thickavg  | ICC2 | 0.423 | 3.86   | 26 | 26  | 4.98E-04  | 0.0169  | 0.6828 | v5.3 vs. v7.1 | HNU |
| RH_entorhinal_thickavg  | ICC3 | 0.542 | 12.83  | 26 | 234 | 4.53E-32  | 0.4225  | 0.6783 | v6.0          | HNU |
| RH_entorhinal_thickavg  | ICC2 | 0.469 | 4.37   | 26 | 26  | 1.76E-04  | 0.0448  | 0.7181 | v6.0 vs. v7.1 | HNU |
| RH_entorhinal_thickavg  | ICC3 | 0.584 | 15.06  | 26 | 234 | 1.10E-36  | 0.4669  | 0.7136 | v7.1          | HNU |
| RH_frontalpole_surfavg  | ICC3 | 0.647 | 19.30  | 26 | 234 | 1.72E-44  | 0.5350  | 0.7631 | v5.3          | HNU |
| RH_frontalpole_surfavg  | ICC2 | 0.320 | 2.58   | 26 | 26  | 9.32E-03  | 0.0005  | 0.5783 | v5.3 vs. v6.0 | HNU |
| RH_frontalpole_surfavg  | ICC2 | 0.325 | 6.71   | 26 | 26  | 3.31E-06  | -0.0602 | 0.6470 | v5.3 vs. v7.1 | HNU |
| RH_frontalpole_surfavg  | ICC3 | 0.704 | 24.78  | 26 | 234 | 4.09E-53  | 0.6009  | 0.8064 | v6.0          | HNU |
| RH_frontalpole_surfavg  | ICC2 | 0.589 | 7.83   | 26 | 26  | 6.90E-07  | 0.0366  | 0.8161 | v6.0 vs. v7.1 | HNU |
| RH_frontalpole_surfavg  | ICC3 | 0.775 | 35.35  | 26 | 234 | 1.60E-66  | 0.6866  | 0.8568 | v7.1          | HNU |
| RH_frontalpole_thickavg | ICC3 | 0.728 | 27.77  | 26 | 234 | 2.84E-57  | 0.6296  | 0.8239 | v5.3          | HNU |
| RH_frontalpole_thickavg | ICC2 | 0.733 | 6.28   | 26 | 26  | 6.31E-06  | 0.5394  | 0.8523 | v5.3 vs. v6.0 | HNU |
| RH_frontalpole_thickavg | ICC2 | 0.698 | 5.46   | 26 | 26  | 2.38E-05  | 0.4872  | 0.8317 | v5.3 vs. v7.1 | HNU |
| RH_frontalpole_thickavg | ICC3 | 0.754 | 31.68  | 26 | 234 | 3.02E-62  | 0.6613  | 0.8426 | v6.0          | HNU |
| RH_frontalpole_thickavg | ICC2 | 0.862 | 13.11  | 26 | 26  | 2.61E-09  | 0.7499  | 0.9260 | v6.0 vs. v7.1 | HNU |
| RH_frontalpole_thickavg | ICC3 | 0.807 | 42.76  | 26 | 234 | 3.50E-74  | 0.7276  | 0.8789 | v7.1          | HNU |
| RH_fusiform_surfavg     | ICC3 | 0.937 | 148.51 | 26 | 234 | 4.73E-130 | 0.9050  | 0.9622 | v5.3          | HNU |
| RH_fusiform_surfavg     | ICC2 | 0.771 | 21.61  | 26 | 26  | 7.79E-12  | 0.0829  | 0.9180 | v5.3 vs. v6.0 | HNU |
| RH_fusiform_surfavg     | ICC2 | 0.762 | 16.10  | 26 | 26  | 2.49E-10  | 0.1801  | 0.9073 | v5.3 vs. v7.1 | HNU |
| RH_fusiform_surfavg     | ICC3 | 0.969 | 309.93 | 26 | 234 | 9.62E-166 | 0.9523  | 0.9816 | v6.0          | HNU |
| RH_fusiform_surfavg     | ICC2 | 0.979 | 91.23  | 26 | 26  | 1.32E-19  | 0.9599  | 0.9890 | v6.0 vs. v7.1 | HNU |
| RH_fusiform_surfavg     | ICC3 | 0.964 | 266.11 | 26 | 234 | 2.96E-158 | 0.9449  | 0.9786 | v7.1          | HNU |
| RH_fusiform_thickavg    | ICC3 | 0.601 | 16.04  | 26 | 234 | 1.37E-38  | 0.4843  | 0.7268 | v5.3          | HNU |
| RH_fusiform_thickavg    | ICC2 | 0.715 | 11.25  | 26 | 26  | 1.45E-08  | 0.1999  | 0.8786 | v5.3 vs. v6.0 | HNU |
| RH_fusiform_thickavg    | ICC2 | 0.677 | 5.28   | 26 | 26  | 3.25E-05  | 0.4634  | 0.8178 | v5.3 vs. v7.1 | HNU |
| RH_fusiform_thickavg    | ICC3 | 0.740 | 29.46  | 26 | 234 | 1.74E-59  | 0.6440  | 0.8325 | v6.0          | HNU |
| RH_fusiform_thickavg    | ICC2 | 0.737 | 10.12  | 26 | 26  | 4.59E-08  | 0.3659  | 0.8783 | v6.0 vs. v7.1 | HNU |

|                              |      |       |        |    |     |           |        |        |               |     |
|------------------------------|------|-------|--------|----|-----|-----------|--------|--------|---------------|-----|
| RH_fusiform_thickavg         | ICC3 | 0.718 | 26.41  | 26 | 234 | 2.00E-55  | 0.6171 | 0.8164 | v7.1          | HNU |
| RH_Hippocampus               | ICC3 | 0.735 | 28.74  | 26 | 234 | 1.51E-58  | 0.6380 | 0.8289 | v5.3          | HNU |
| RH_Hippocampus               | ICC2 | 0.785 | 8.88   | 26 | 26  | 1.87E-07  | 0.6213 | 0.8826 | v5.3 vs. v6.0 | HNU |
| RH_Hippocampus               | ICC2 | 0.746 | 11.32  | 26 | 26  | 1.35E-08  | 0.3307 | 0.8873 | v5.3 vs. v7.1 | HNU |
| RH_Hippocampus               | ICC3 | 0.864 | 64.63  | 26 | 234 | 8.80E-92  | 0.8035 | 0.9168 | v6.0          | HNU |
| RH_Hippocampus               | ICC2 | 0.897 | 31.05  | 26 | 26  | 9.69E-14  | 0.6402 | 0.9582 | v6.0 vs. v7.1 | HNU |
| RH_Hippocampus               | ICC3 | 0.869 | 67.63  | 26 | 234 | 8.85E-94  | 0.8107 | 0.9202 | v7.1          | HNU |
| RH_inferiorparietal_surfavg  | ICC3 | 0.969 | 313.51 | 26 | 234 | 2.62E-166 | 0.9529 | 0.9818 | v5.3          | HNU |
| RH_inferiorparietal_surfavg  | ICC2 | 0.920 | 23.72  | 26 | 26  | 2.55E-12  | 0.8528 | 0.9578 | v5.3 vs. v6.0 | HNU |
| RH_inferiorparietal_surfavg  | ICC2 | 0.916 | 24.38  | 26 | 26  | 1.83E-12  | 0.8411 | 0.9556 | v5.3 vs. v7.1 | HNU |
| RH_inferiorparietal_surfavg  | ICC3 | 0.955 | 211.55 | 26 | 234 | 4.56E-147 | 0.9316 | 0.9732 | v6.0          | HNU |
| RH_inferiorparietal_surfavg  | ICC2 | 0.968 | 131.26 | 26 | 26  | 1.26E-21  | 0.7824 | 0.9887 | v6.0 vs. v7.1 | HNU |
| RH_inferiorparietal_surfavg  | ICC3 | 0.965 | 274.62 | 26 | 234 | 8.46E-160 | 0.9465 | 0.9792 | v7.1          | HNU |
| RH_inferiorparietal_thickavg | ICC3 | 0.734 | 28.56  | 26 | 234 | 2.53E-58  | 0.6365 | 0.8281 | v5.3          | HNU |
| RH_inferiorparietal_thickavg | ICC2 | 0.605 | 9.24   | 26 | 26  | 1.22E-07  | 0.0121 | 0.8315 | v5.3 vs. v6.0 | HNU |
| RH_inferiorparietal_thickavg | ICC2 | 0.762 | 8.78   | 26 | 26  | 2.11E-07  | 0.5535 | 0.8741 | v5.3 vs. v7.1 | HNU |
| RH_inferiorparietal_thickavg | ICC3 | 0.725 | 27.37  | 26 | 234 | 9.73E-57  | 0.6260 | 0.8218 | v6.0          | HNU |
| RH_inferiorparietal_thickavg | ICC2 | 0.737 | 11.73  | 26 | 26  | 9.12E-09  | 0.2658 | 0.8870 | v6.0 vs. v7.1 | HNU |
| RH_inferiorparietal_thickavg | ICC3 | 0.713 | 25.88  | 26 | 234 | 1.11E-54  | 0.6120 | 0.8132 | v7.1          | HNU |
| RH_inferiortemporal_surfavg  | ICC3 | 0.933 | 140.06 | 26 | 234 | 2.88E-127 | 0.8998 | 0.9600 | v5.3          | HNU |
| RH_inferiortemporal_surfavg  | ICC2 | 0.883 | 28.15  | 26 | 26  | 3.22E-13  | 0.5780 | 0.9531 | v5.3 vs. v6.0 | HNU |
| RH_inferiortemporal_surfavg  | ICC2 | 0.887 | 30.50  | 26 | 26  | 1.21E-13  | 0.5538 | 0.9556 | v5.3 vs. v7.1 | HNU |
| RH_inferiortemporal_surfavg  | ICC3 | 0.939 | 155.62 | 26 | 234 | 2.80E-132 | 0.9090 | 0.9639 | v6.0          | HNU |
| RH_inferiortemporal_surfavg  | ICC2 | 0.984 | 120.44 | 26 | 26  | 3.80E-21  | 0.9696 | 0.9917 | v6.0 vs. v7.1 | HNU |
| RH_inferiortemporal_surfavg  | ICC3 | 0.963 | 260.67 | 26 | 234 | 3.03E-157 | 0.9438 | 0.9781 | v7.1          | HNU |
| RH_inferiortemporal_thickavg | ICC3 | 0.590 | 15.40  | 26 | 234 | 2.37E-37  | 0.4731 | 0.7183 | v5.3          | HNU |
| RH_inferiortemporal_thickavg | ICC2 | 0.732 | 8.62   | 26 | 26  | 2.55E-07  | 0.4448 | 0.8655 | v5.3 vs. v6.0 | HNU |
| RH_inferiortemporal_thickavg | ICC2 | 0.754 | 7.00   | 26 | 26  | 2.16E-06  | 0.5745 | 0.8640 | v5.3 vs. v7.1 | HNU |
| RH_inferiortemporal_thickavg | ICC3 | 0.699 | 24.18  | 26 | 234 | 3.11E-52  | 0.5946 | 0.8024 | v6.0          | HNU |
| RH_inferiortemporal_thickavg | ICC2 | 0.737 | 13.46  | 26 | 26  | 1.94E-09  | 0.1793 | 0.8932 | v6.0 vs. v7.1 | HNU |
| RH_inferiortemporal_thickavg | ICC3 | 0.670 | 21.33  | 26 | 234 | 7.53E-48  | 0.5618 | 0.7812 | v7.1          | HNU |
| RH_insula_surfavg            | ICC3 | 0.770 | 34.42  | 26 | 234 | 1.78E-65  | 0.6806 | 0.8535 | v5.3          | HNU |
| RH_insula_surfavg            | ICC2 | 0.604 | 7.96   | 26 | 26  | 5.82E-07  | 0.0579 | 0.8226 | v5.3 vs. v6.0 | HNU |
| RH_insula_surfavg            | ICC2 | 0.546 | 5.62   | 26 | 26  | 1.84E-05  | 0.0867 | 0.7743 | v5.3 vs. v7.1 | HNU |
| RH_insula_surfavg            | ICC3 | 0.764 | 33.41  | 26 | 234 | 2.62E-64  | 0.6738 | 0.8496 | v6.0          | HNU |
| RH_insula_surfavg            | ICC2 | 0.786 | 8.08   | 26 | 26  | 5.05E-07  | 0.6230 | 0.8830 | v6.0 vs. v7.1 | HNU |
| RH_insula_surfavg            | ICC3 | 0.812 | 44.06  | 26 | 234 | 2.03E-75  | 0.7337 | 0.8821 | v7.1          | HNU |
| RH_insula_thickavg           | ICC3 | 0.495 | 10.82  | 26 | 234 | 1.57E-27  | 0.3754 | 0.6379 | v5.3          | HNU |
| RH_insula_thickavg           | ICC2 | 0.407 | 2.60   | 26 | 26  | 8.89E-03  | 0.1197 | 0.6354 | v5.3 vs. v6.0 | HNU |
| RH_insula_thickavg           | ICC2 | 0.608 | 3.99   | 26 | 26  | 3.75E-04  | 0.3569 | 0.7765 | v5.3 vs. v7.1 | HNU |
| RH_insula_thickavg           | ICC3 | 0.506 | 11.24  | 26 | 234 | 1.60E-28  | 0.3860 | 0.6472 | v6.0          | HNU |
| RH_insula_thickavg           | ICC2 | 0.620 | 5.66   | 26 | 26  | 1.70E-05  | 0.2881 | 0.7994 | v6.0 vs. v7.1 | HNU |
| RH_insula_thickavg           | ICC3 | 0.649 | 19.52  | 26 | 234 | 7.09E-45  | 0.5382 | 0.7653 | v7.1          | HNU |
| RH_isthmuscingulate_surfavg  | ICC3 | 0.907 | 99.04  | 26 | 234 | 4.82E-111 | 0.8634 | 0.9443 | v5.3          | HNU |

|                                  |      |       |         |    |     |           |         |        |               |     |
|----------------------------------|------|-------|---------|----|-----|-----------|---------|--------|---------------|-----|
| RH_isthmuscingulate_surfavg      | ICC2 | 0.837 | 13.70   | 26 | 26  | 1.60E-09  | 0.6705  | 0.9171 | v5.3 vs. v6.0 | HNU |
| RH_isthmuscingulate_surfavg      | ICC2 | 0.855 | 13.23   | 26 | 26  | 2.37E-09  | 0.7403  | 0.9221 | v5.3 vs. v7.1 | HNU |
| RH_isthmuscingulate_surfavg      | ICC3 | 0.962 | 252.83  | 26 | 234 | 9.42E-156 | 0.9421  | 0.9775 | v6.0          | HNU |
| RH_isthmuscingulate_surfavg      | ICC2 | 0.965 | 80.44   | 26 | 26  | 6.53E-19  | 0.8946  | 0.9847 | v6.0 vs. v7.1 | HNU |
| RH_isthmuscingulate_surfavg      | ICC3 | 0.955 | 214.90  | 26 | 234 | 7.87E-148 | 0.9326  | 0.9736 | v7.1          | HNU |
| RH_isthmuscingulate_thickavg     | ICC3 | 0.850 | 57.65   | 26 | 234 | 8.48E-87  | 0.7843  | 0.9076 | v5.3          | HNU |
| RH_isthmuscingulate_thickavg     | ICC2 | 0.759 | 7.81    | 26 | 26  | 7.10E-07  | 0.5801  | 0.8674 | v5.3 vs. v6.0 | HNU |
| RH_isthmuscingulate_thickavg     | ICC2 | 0.571 | 6.23    | 26 | 26  | 6.84E-06  | 0.0940  | 0.7927 | v5.3 vs. v7.1 | HNU |
| RH_isthmuscingulate_thickavg     | ICC3 | 0.837 | 52.42   | 26 | 234 | 1.04E-82  | 0.7673  | 0.8992 | v6.0          | HNU |
| RH_isthmuscingulate_thickavg     | ICC2 | 0.755 | 14.95   | 26 | 26  | 5.85E-10  | 0.1913  | 0.9026 | v6.0 vs. v7.1 | HNU |
| RH_isthmuscingulate_thickavg     | ICC3 | 0.862 | 63.36   | 26 | 234 | 6.57E-91  | 0.8002  | 0.9153 | v7.1          | HNU |
| RH_lateraloccipital_surfavg      | ICC3 | 0.946 | 176.37  | 26 | 234 | 2.79E-138 | 0.9189  | 0.9680 | v5.3          | HNU |
| RH_lateraloccipital_surfavg      | ICC2 | 0.738 | 29.11   | 26 | 26  | 2.14E-13  | -0.0134 | 0.9120 | v5.3 vs. v6.0 | HNU |
| RH_lateraloccipital_surfavg      | ICC2 | 0.609 | 32.83   | 26 | 26  | 4.91E-14  | -0.0286 | 0.8606 | v5.3 vs. v7.1 | HNU |
| RH_lateraloccipital_surfavg      | ICC3 | 0.963 | 261.33  | 26 | 234 | 2.28E-157 | 0.9439  | 0.9782 | v6.0          | HNU |
| RH_lateraloccipital_surfavg      | ICC2 | 0.946 | 129.63  | 26 | 26  | 1.48E-21  | 0.3772  | 0.9838 | v6.0 vs. v7.1 | HNU |
| RH_lateraloccipital_surfavg      | ICC3 | 0.951 | 194.77  | 26 | 234 | 4.60E-143 | 0.9260  | 0.9709 | v7.1          | HNU |
| RH_lateraloccipital_thickavg     | ICC3 | 0.792 | 39.12   | 26 | 234 | 1.46E-70  | 0.7089  | 0.8690 | v5.3          | HNU |
| RH_lateraloccipital_thickavg     | ICC2 | 0.656 | 11.47   | 26 | 26  | 1.17E-08  | 0.0327  | 0.8605 | v5.3 vs. v6.0 | HNU |
| RH_lateraloccipital_thickavg     | ICC2 | 0.699 | 7.07    | 26 | 26  | 1.96E-06  | 0.4324  | 0.8417 | v5.3 vs. v7.1 | HNU |
| RH_lateraloccipital_thickavg     | ICC3 | 0.850 | 57.61   | 26 | 234 | 9.09E-87  | 0.7842  | 0.9075 | v6.0          | HNU |
| RH_lateraloccipital_thickavg     | ICC2 | 0.817 | 14.02   | 26 | 26  | 1.22E-09  | 0.5616  | 0.9144 | v6.0 vs. v7.1 | HNU |
| RH_lateraloccipital_thickavg     | ICC3 | 0.870 | 68.01   | 26 | 234 | 5.00E-94  | 0.8116  | 0.9207 | v7.1          | HNU |
| RH_lateralorbitofrontal_surfavg  | ICC3 | 0.790 | 38.56   | 26 | 234 | 5.53E-70  | 0.7058  | 0.8673 | v5.3          | HNU |
| RH_lateralorbitofrontal_surfavg  | ICC2 | 0.896 | 20.44   | 26 | 26  | 1.52E-11  | 0.8012  | 0.9460 | v5.3 vs. v6.0 | HNU |
| RH_lateralorbitofrontal_surfavg  | ICC2 | 0.649 | 8.49    | 26 | 26  | 2.98E-07  | 0.1413  | 0.8425 | v5.3 vs. v7.1 | HNU |
| RH_lateralorbitofrontal_surfavg  | ICC3 | 0.814 | 44.67   | 26 | 234 | 5.51E-76  | 0.7365  | 0.8835 | v6.0          | HNU |
| RH_lateralorbitofrontal_surfavg  | ICC2 | 0.775 | 14.96   | 26 | 26  | 5.80E-10  | 0.2804  | 0.9079 | v6.0 vs. v7.1 | HNU |
| RH_lateralorbitofrontal_surfavg  | ICC3 | 0.762 | 32.93   | 26 | 234 | 9.60E-64  | 0.6704  | 0.8477 | v7.1          | HNU |
| RH_lateralorbitofrontal_thickavg | ICC3 | 0.588 | 15.24   | 26 | 234 | 4.71E-37  | 0.4703  | 0.7162 | v5.3          | HNU |
| RH_lateralorbitofrontal_thickavg | ICC2 | 0.698 | 11.57   | 26 | 26  | 1.07E-08  | 0.1286  | 0.8751 | v5.3 vs. v6.0 | HNU |
| RH_lateralorbitofrontal_thickavg | ICC2 | 0.728 | 6.41    | 26 | 26  | 5.14E-06  | 0.5378  | 0.8485 | v5.3 vs. v7.1 | HNU |
| RH_lateralorbitofrontal_thickavg | ICC3 | 0.622 | 17.47   | 26 | 234 | 2.94E-41  | 0.5078  | 0.7440 | v6.0          | HNU |
| RH_lateralorbitofrontal_thickavg | ICC2 | 0.655 | 7.09    | 26 | 26  | 1.90E-06  | 0.2678  | 0.8304 | v6.0 vs. v7.1 | HNU |
| RH_lateralorbitofrontal_thickavg | ICC3 | 0.513 | 11.54   | 26 | 234 | 3.34E-29  | 0.3931  | 0.6535 | v7.1          | HNU |
| RH_LateralVentricle              | ICC3 | 0.995 | 2144.57 | 26 | 234 | 1.16E-262 | 0.9929  | 0.9973 | v5.3          | HNU |
| RH_LateralVentricle              | ICC2 | 0.987 | 881.39  | 26 | 26  | 2.61E-32  | 0.5902  | 0.9965 | v5.3 vs. v6.0 | HNU |
| RH_LateralVentricle              | ICC2 | 0.988 | 1314.01 | 26 | 26  | 1.47E-34  | 0.5209  | 0.9970 | v5.3 vs. v7.1 | HNU |
| RH_LateralVentricle              | ICC3 | 0.997 | 3242.50 | 26 | 234 | 1.37E-283 | 0.9953  | 0.9982 | v6.0          | HNU |
| RH_LateralVentricle              | ICC2 | 0.999 | 1941.83 | 26 | 26  | 9.20E-37  | 0.9981  | 0.9995 | v6.0 vs. v7.1 | HNU |
| RH_LateralVentricle              | ICC3 | 0.997 | 3610.70 | 26 | 234 | 4.86E-289 | 0.9957  | 0.9984 | v7.1          | HNU |
| RH_lingual_surfavg               | ICC3 | 0.878 | 73.13   | 26 | 234 | 2.94E-97  | 0.8227  | 0.9258 | v5.3          | HNU |
| RH_lingual_surfavg               | ICC2 | 0.857 | 16.48   | 26 | 26  | 1.90E-10  | 0.6903  | 0.9296 | v5.3 vs. v6.0 | HNU |
| RH_lingual_surfavg               | ICC2 | 0.697 | 10.34   | 26 | 26  | 3.63E-08  | 0.1829  | 0.8688 | v5.3 vs. v7.1 | HNU |



|                                 |      |       |        |    |     |           |         |        |               |     |
|---------------------------------|------|-------|--------|----|-----|-----------|---------|--------|---------------|-----|
| RH_lingual_surfavg              | ICC3 | 0.931 | 136.38 | 26 | 234 | 5.25E-126 | 0.8973  | 0.9590 | v6.0          | HNU |
| RH_lingual_surfavg              | ICC2 | 0.885 | 32.10  | 26 | 26  | 6.46E-14  | 0.5059  | 0.9564 | v6.0 vs. v7.1 | HNU |
| RH_lingual_surfavg              | ICC3 | 0.940 | 158.50 | 26 | 234 | 3.71E-133 | 0.9105  | 0.9645 | v7.1          | HNU |
| RH_lingual_thickavg             | ICC3 | 0.701 | 24.42  | 26 | 234 | 1.37E-52  | 0.5972  | 0.8040 | v5.3          | HNU |
| RH_lingual_thickavg             | ICC2 | 0.859 | 22.16  | 26 | 26  | 5.78E-12  | 0.5428  | 0.9416 | v5.3 vs. v6.0 | HNU |
| RH_lingual_thickavg             | ICC2 | 0.877 | 16.08  | 26 | 26  | 2.53E-10  | 0.7740  | 0.9341 | v5.3 vs. v7.1 | HNU |
| RH_lingual_thickavg             | ICC3 | 0.737 | 28.99  | 26 | 234 | 7.02E-59  | 0.6401  | 0.8302 | v6.0          | HNU |
| RH_lingual_thickavg             | ICC2 | 0.802 | 21.08  | 26 | 26  | 1.05E-11  | 0.2079  | 0.9264 | v6.0 vs. v7.1 | HNU |
| RH_lingual_thickavg             | ICC3 | 0.779 | 36.21  | 26 | 234 | 1.78E-67  | 0.6920  | 0.8598 | v7.1          | HNU |
| RH_medialorbitofrontal_surfavg  | ICC3 | 0.791 | 38.84  | 26 | 234 | 2.84E-70  | 0.7073  | 0.8681 | v5.3          | HNU |
| RH_medialorbitofrontal_surfavg  | ICC2 | 0.751 | 11.58  | 26 | 26  | 1.05E-08  | 0.3374  | 0.8897 | v5.3 vs. v6.0 | HNU |
| RH_medialorbitofrontal_surfavg  | ICC2 | 0.345 | 7.38   | 26 | 26  | 1.27E-06  | -0.0591 | 0.6678 | v5.3 vs. v7.1 | HNU |
| RH_medialorbitofrontal_surfavg  | ICC3 | 0.805 | 42.24  | 26 | 234 | 1.10E-73  | 0.7251  | 0.8776 | v6.0          | HNU |
| RH_medialorbitofrontal_surfavg  | ICC2 | 0.609 | 11.97  | 26 | 26  | 7.28E-09  | -0.0301 | 0.8433 | v6.0 vs. v7.1 | HNU |
| RH_medialorbitofrontal_surfavg  | ICC3 | 0.783 | 37.05  | 26 | 234 | 2.22E-68  | 0.6971  | 0.8626 | v7.1          | HNU |
| RH_medialorbitofrontal_thickavg | ICC3 | 0.525 | 12.06  | 26 | 234 | 2.20E-30  | 0.4054  | 0.6640 | v5.3          | HNU |
| RH_medialorbitofrontal_thickavg | ICC2 | 0.640 | 9.70   | 26 | 26  | 7.32E-08  | 0.0577  | 0.8471 | v5.3 vs. v6.0 | HNU |
| RH_medialorbitofrontal_thickavg | ICC2 | 0.775 | 7.95   | 26 | 26  | 5.92E-07  | 0.6096  | 0.8760 | v5.3 vs. v7.1 | HNU |
| RH_medialorbitofrontal_thickavg | ICC3 | 0.641 | 18.88  | 26 | 234 | 9.00E-44  | 0.5291  | 0.7590 | v6.0          | HNU |
| RH_medialorbitofrontal_thickavg | ICC2 | 0.635 | 8.39   | 26 | 26  | 3.40E-07  | 0.1089  | 0.8371 | v6.0 vs. v7.1 | HNU |
| RH_medialorbitofrontal_thickavg | ICC3 | 0.577 | 14.65  | 26 | 234 | 7.28E-36  | 0.4592  | 0.7077 | v7.1          | HNU |
| RH_middletemporal_surfavg       | ICC3 | 0.966 | 285.51 | 26 | 234 | 1.04E-161 | 0.9485  | 0.9800 | v5.3          | HNU |
| RH_middletemporal_surfavg       | ICC2 | 0.894 | 31.15  | 26 | 26  | 9.35E-14  | 0.6115  | 0.9577 | v5.3 vs. v6.0 | HNU |
| RH_middletemporal_surfavg       | ICC2 | 0.807 | 21.38  | 26 | 26  | 8.87E-12  | 0.2261  | 0.9282 | v5.3 vs. v7.1 | HNU |
| RH_middletemporal_surfavg       | ICC3 | 0.980 | 488.48 | 26 | 234 | 2.80E-188 | 0.9693  | 0.9882 | v6.0          | HNU |
| RH_middletemporal_surfavg       | ICC2 | 0.966 | 140.07 | 26 | 26  | 5.48E-22  | 0.7306  | 0.9888 | v6.0 vs. v7.1 | HNU |
| RH_middletemporal_surfavg       | ICC3 | 0.984 | 615.39 | 26 | 234 | 8.33E-200 | 0.9755  | 0.9906 | v7.1          | HNU |
| RH_middletemporal_thickavg      | ICC3 | 0.652 | 19.75  | 26 | 234 | 2.91E-45  | 0.5413  | 0.7674 | v5.3          | HNU |
| RH_middletemporal_thickavg      | ICC2 | 0.815 | 19.25  | 26 | 26  | 3.07E-11  | 0.3312  | 0.9271 | v5.3 vs. v6.0 | HNU |
| RH_middletemporal_thickavg      | ICC2 | 0.762 | 7.82   | 26 | 26  | 7.07E-07  | 0.5873  | 0.8689 | v5.3 vs. v7.1 | HNU |
| RH_middletemporal_thickavg      | ICC3 | 0.762 | 33.03  | 26 | 234 | 7.27E-64  | 0.6711  | 0.8481 | v6.0          | HNU |
| RH_middletemporal_thickavg      | ICC2 | 0.634 | 11.44  | 26 | 26  | 1.21E-08  | 0.0006  | 0.8521 | v6.0 vs. v7.1 | HNU |
| RH_middletemporal_thickavg      | ICC3 | 0.696 | 23.86  | 26 | 234 | 9.09E-52  | 0.5912  | 0.8003 | v7.1          | HNU |
| RH_Pallidum                     | ICC3 | 0.706 | 25.03  | 26 | 234 | 1.79E-53  | 0.6035  | 0.8080 | v5.3          | HNU |
| RH_Pallidum                     | ICC2 | 0.642 | 4.57   | 26 | 26  | 1.20E-04  | 0.4110  | 0.7967 | v5.3 vs. v6.0 | HNU |
| RH_Pallidum                     | ICC2 | 0.475 | 3.35   | 26 | 26  | 1.51E-03  | 0.1738  | 0.6911 | v5.3 vs. v7.1 | HNU |
| RH_Pallidum                     | ICC3 | 0.848 | 56.74  | 26 | 234 | 4.18E-86  | 0.7815  | 0.9062 | v6.0          | HNU |
| RH_Pallidum                     | ICC2 | 0.842 | 23.44  | 26 | 26  | 2.94E-12  | 0.3738  | 0.9393 | v6.0 vs. v7.1 | HNU |
| RH_Pallidum                     | ICC3 | 0.841 | 53.74  | 26 | 234 | 8.95E-84  | 0.7718  | 0.9015 | v7.1          | HNU |
| RH_paracentral_surfavg          | ICC3 | 0.950 | 189.06 | 26 | 234 | 1.25E-141 | 0.9240  | 0.9701 | v5.3          | HNU |
| RH_paracentral_surfavg          | ICC2 | 0.915 | 22.28  | 26 | 26  | 5.40E-12  | 0.8433  | 0.9549 | v5.3 vs. v6.0 | HNU |
| RH_paracentral_surfavg          | ICC2 | 0.931 | 27.06  | 26 | 26  | 5.19E-13  | 0.8708  | 0.9635 | v5.3 vs. v7.1 | HNU |
| RH_paracentral_surfavg          | ICC3 | 0.974 | 379.24 | 26 | 234 | 1.04E-175 | 0.9607  | 0.9849 | v6.0          | HNU |
| RH_paracentral_surfavg          | ICC2 | 0.975 | 78.21  | 26 | 26  | 9.34E-19  | 0.9527  | 0.9869 | v6.0 vs. v7.1 | HNU |

|                             |      |       |        |    |     |           |         |        |               |     |
|-----------------------------|------|-------|--------|----|-----|-----------|---------|--------|---------------|-----|
| RH_paracentral_surfavg      | ICC3 | 0.972 | 350.72 | 26 | 234 | 7.67E-172 | 0.9577  | 0.9837 | v7.1          | HNU |
| RH_paracentral_thickavg     | ICC3 | 0.778 | 36.13  | 26 | 234 | 2.21E-67  | 0.6915  | 0.8595 | v5.3          | HNU |
| RH_paracentral_thickavg     | ICC2 | 0.601 | 21.40  | 26 | 26  | 8.74E-12  | -0.0406 | 0.8523 | v5.3 vs. v6.0 | HNU |
| RH_paracentral_thickavg     | ICC2 | 0.592 | 15.62  | 26 | 26  | 3.53E-10  | -0.0465 | 0.8429 | v5.3 vs. v7.1 | HNU |
| RH_paracentral_thickavg     | ICC3 | 0.751 | 31.11  | 26 | 234 | 1.47E-61  | 0.6571  | 0.8401 | v6.0          | HNU |
| RH_paracentral_thickavg     | ICC2 | 0.840 | 11.13  | 26 | 26  | 1.63E-08  | 0.7120  | 0.9137 | v6.0 vs. v7.1 | HNU |
| RH_paracentral_thickavg     | ICC3 | 0.759 | 32.43  | 26 | 234 | 3.75E-63  | 0.6668  | 0.8457 | v7.1          | HNU |
| RH_parahippocampal_surfavg  | ICC3 | 0.865 | 64.95  | 26 | 234 | 5.32E-92  | 0.8043  | 0.9172 | v5.3          | HNU |
| RH_parahippocampal_surfavg  | ICC2 | 0.568 | 6.12   | 26 | 26  | 8.15E-06  | 0.0971  | 0.7903 | v5.3 vs. v6.0 | HNU |
| RH_parahippocampal_surfavg  | ICC2 | 0.678 | 12.68  | 26 | 26  | 3.80E-09  | 0.0411  | 0.8720 | v5.3 vs. v7.1 | HNU |
| RH_parahippocampal_surfavg  | ICC3 | 0.895 | 86.24  | 26 | 234 | 1.07E-104 | 0.8459  | 0.9365 | v6.0          | HNU |
| RH_parahippocampal_surfavg  | ICC2 | 0.909 | 20.21  | 26 | 26  | 1.73E-11  | 0.8311  | 0.9517 | v6.0 vs. v7.1 | HNU |
| RH_parahippocampal_surfavg  | ICC3 | 0.915 | 109.30 | 26 | 234 | 1.30E-115 | 0.8747  | 0.9493 | v7.1          | HNU |
| RH_parahippocampal_thickavg | ICC3 | 0.806 | 42.61  | 26 | 234 | 4.85E-74  | 0.7269  | 0.8785 | v5.3          | HNU |
| RH_parahippocampal_thickavg | ICC2 | 0.888 | 28.15  | 26 | 26  | 3.22E-13  | 0.6180  | 0.9540 | v5.3 vs. v6.0 | HNU |
| RH_parahippocampal_thickavg | ICC2 | 0.870 | 16.55  | 26 | 26  | 1.81E-10  | 0.7458  | 0.9325 | v5.3 vs. v7.1 | HNU |
| RH_parahippocampal_thickavg | ICC3 | 0.838 | 52.84  | 26 | 234 | 4.73E-83  | 0.7687  | 0.8999 | v6.0          | HNU |
| RH_parahippocampal_thickavg | ICC2 | 0.814 | 44.53  | 26 | 26  | 1.12E-15  | 0.0237  | 0.9415 | v6.0 vs. v7.1 | HNU |
| RH_parahippocampal_thickavg | ICC3 | 0.814 | 44.73  | 26 | 234 | 4.79E-76  | 0.7368  | 0.8837 | v7.1          | HNU |
| RH_parsopercularis_surfavg  | ICC3 | 0.967 | 298.11 | 26 | 234 | 7.89E-164 | 0.9505  | 0.9808 | v5.3          | HNU |
| RH_parsopercularis_surfavg  | ICC2 | 0.854 | 12.76  | 26 | 26  | 3.55E-09  | 0.7389  | 0.9215 | v5.3 vs. v6.0 | HNU |
| RH_parsopercularis_surfavg  | ICC2 | 0.813 | 9.58   | 26 | 26  | 8.33E-08  | 0.6701  | 0.8985 | v5.3 vs. v7.1 | HNU |
| RH_parsopercularis_surfavg  | ICC3 | 0.982 | 534.84 | 26 | 234 | 8.46E-193 | 0.9719  | 0.9892 | v6.0          | HNU |
| RH_parsopercularis_surfavg  | ICC2 | 0.979 | 89.96  | 26 | 26  | 1.58E-19  | 0.9594  | 0.9889 | v6.0 vs. v7.1 | HNU |
| RH_parsopercularis_surfavg  | ICC3 | 0.984 | 610.11 | 26 | 234 | 2.25E-199 | 0.9753  | 0.9906 | v7.1          | HNU |
| RH_parsopercularis_thickavg | ICC3 | 0.751 | 31.16  | 26 | 234 | 1.28E-61  | 0.6575  | 0.8403 | v5.3          | HNU |
| RH_parsopercularis_thickavg | ICC2 | 0.648 | 13.29  | 26 | 26  | 2.25E-09  | -0.0112 | 0.8625 | v5.3 vs. v6.0 | HNU |
| RH_parsopercularis_thickavg | ICC2 | 0.636 | 10.64  | 26 | 26  | 2.66E-08  | 0.0207  | 0.8500 | v5.3 vs. v7.1 | HNU |
| RH_parsopercularis_thickavg | ICC3 | 0.828 | 49.04  | 26 | 234 | 6.88E-80  | 0.7548  | 0.8929 | v6.0          | HNU |
| RH_parsopercularis_thickavg | ICC2 | 0.850 | 12.26  | 26 | 26  | 5.58E-09  | 0.7308  | 0.9189 | v6.0 vs. v7.1 | HNU |
| RH_parsopercularis_thickavg | ICC3 | 0.773 | 34.96  | 26 | 234 | 4.43E-66  | 0.6841  | 0.8554 | v7.1          | HNU |
| RH_parsorbitalis_surfavg    | ICC3 | 0.933 | 140.71 | 26 | 234 | 1.74E-127 | 0.9002  | 0.9602 | v5.3          | HNU |
| RH_parsorbitalis_surfavg    | ICC2 | 0.819 | 23.98  | 26 | 26  | 2.24E-12  | 0.2227  | 0.9342 | v5.3 vs. v6.0 | HNU |
| RH_parsorbitalis_surfavg    | ICC2 | 0.733 | 24.89  | 26 | 26  | 1.43E-12  | -0.0065 | 0.9080 | v5.3 vs. v7.1 | HNU |
| RH_parsorbitalis_surfavg    | ICC3 | 0.967 | 294.71 | 26 | 234 | 2.89E-163 | 0.9500  | 0.9806 | v6.0          | HNU |
| RH_parsorbitalis_surfavg    | ICC2 | 0.951 | 86.91  | 26 | 26  | 2.45E-19  | 0.6904  | 0.9829 | v6.0 vs. v7.1 | HNU |
| RH_parsorbitalis_surfavg    | ICC3 | 0.976 | 413.19 | 26 | 234 | 5.86E-180 | 0.9639  | 0.9861 | v7.1          | HNU |
| RH_parsorbitalis_thickavg   | ICC3 | 0.717 | 26.38  | 26 | 234 | 2.24E-55  | 0.6168  | 0.8162 | v5.3          | HNU |
| RH_parsorbitalis_thickavg   | ICC2 | 0.571 | 10.05  | 26 | 26  | 4.97E-08  | -0.0365 | 0.8207 | v5.3 vs. v6.0 | HNU |
| RH_parsorbitalis_thickavg   | ICC2 | 0.516 | 4.97   | 26 | 26  | 5.68E-05  | 0.0786  | 0.7509 | v5.3 vs. v7.1 | HNU |
| RH_parsorbitalis_thickavg   | ICC3 | 0.697 | 24.05  | 26 | 234 | 4.86E-52  | 0.5932  | 0.8015 | v6.0          | HNU |
| RH_parsorbitalis_thickavg   | ICC2 | 0.727 | 6.90   | 26 | 26  | 2.51E-06  | 0.5295  | 0.8493 | v6.0 vs. v7.1 | HNU |
| RH_parsorbitalis_thickavg   | ICC3 | 0.643 | 19.02  | 26 | 234 | 5.07E-44  | 0.5312  | 0.7604 | v7.1          | HNU |
| RH_parstriangularis_surfavg | ICC3 | 0.968 | 303.26 | 26 | 234 | 1.14E-164 | 0.9513  | 0.9812 | v5.3          | HNU |

|                                |      |       |        |    |     |           |         |        |               |     |
|--------------------------------|------|-------|--------|----|-----|-----------|---------|--------|---------------|-----|
| RH_parstriangularis_surfavg    | ICC2 | 0.882 | 24.07  | 26 | 26  | 2.14E-12  | 0.6579  | 0.9484 | v5.3 vs. v6.0 | HNU |
| RH_parstriangularis_surfavg    | ICC2 | 0.824 | 24.48  | 26 | 26  | 1.74E-12  | 0.2356  | 0.9359 | v5.3 vs. v7.1 | HNU |
| RH_parstriangularis_surfavg    | ICC3 | 0.980 | 492.95 | 26 | 234 | 9.84E-189 | 0.9696  | 0.9883 | v6.0          | HNU |
| RH_parstriangularis_surfavg    | ICC2 | 0.968 | 141.31 | 26 | 26  | 4.90E-22  | 0.7519  | 0.9891 | v6.0 vs. v7.1 | HNU |
| RH_parstriangularis_surfavg    | ICC3 | 0.983 | 567.50 | 26 | 234 | 9.31E-196 | 0.9735  | 0.9899 | v7.1          | HNU |
| RH_parstriangularis_thickavg   | ICC3 | 0.780 | 36.37  | 26 | 234 | 1.21E-67  | 0.6930  | 0.8603 | v5.3          | HNU |
| RH_parstriangularis_thickavg   | ICC2 | 0.551 | 10.01  | 26 | 26  | 5.21E-08  | -0.0466 | 0.8110 | v5.3 vs. v6.0 | HNU |
| RH_parstriangularis_thickavg   | ICC2 | 0.583 | 6.94   | 26 | 26  | 2.36E-06  | 0.0711  | 0.8055 | v5.3 vs. v7.1 | HNU |
| RH_parstriangularis_thickavg   | ICC3 | 0.805 | 42.28  | 26 | 234 | 1.01E-73  | 0.7253  | 0.8777 | v6.0          | HNU |
| RH_parstriangularis_thickavg   | ICC2 | 0.840 | 12.13  | 26 | 26  | 6.29E-09  | 0.7130  | 0.9138 | v6.0 vs. v7.1 | HNU |
| RH_parstriangularis_thickavg   | ICC3 | 0.791 | 38.95  | 26 | 234 | 2.20E-70  | 0.7079  | 0.8685 | v7.1          | HNU |
| RH_pericalcarine_surfavg       | ICC3 | 0.875 | 70.93  | 26 | 234 | 6.72E-96  | 0.8181  | 0.9237 | v5.3          | HNU |
| RH_pericalcarine_surfavg       | ICC2 | 0.852 | 21.60  | 26 | 26  | 7.83E-12  | 0.5060  | 0.9393 | v5.3 vs. v6.0 | HNU |
| RH_pericalcarine_surfavg       | ICC2 | 0.824 | 18.86  | 26 | 26  | 3.91E-11  | 0.4036  | 0.9286 | v5.3 vs. v7.1 | HNU |
| RH_pericalcarine_surfavg       | ICC3 | 0.940 | 158.01 | 26 | 234 | 5.20E-133 | 0.9102  | 0.9644 | v6.0          | HNU |
| RH_pericalcarine_surfavg       | ICC2 | 0.979 | 96.34  | 26 | 26  | 6.58E-20  | 0.9599  | 0.9890 | v6.0 vs. v7.1 | HNU |
| RH_pericalcarine_surfavg       | ICC3 | 0.948 | 183.18 | 26 | 234 | 4.20E-140 | 0.9217  | 0.9692 | v7.1          | HNU |
| RH_pericalcarine_thickavg      | ICC3 | 0.725 | 27.37  | 26 | 234 | 9.67E-57  | 0.6260  | 0.8218 | v5.3          | HNU |
| RH_pericalcarine_thickavg      | ICC2 | 0.726 | 12.61  | 26 | 26  | 4.07E-09  | 0.1763  | 0.8874 | v5.3 vs. v6.0 | HNU |
| RH_pericalcarine_thickavg      | ICC2 | 0.770 | 10.21  | 26 | 26  | 4.17E-08  | 0.5095  | 0.8860 | v5.3 vs. v7.1 | HNU |
| RH_pericalcarine_thickavg      | ICC3 | 0.771 | 34.75  | 26 | 234 | 7.65E-66  | 0.6827  | 0.8547 | v6.0          | HNU |
| RH_pericalcarine_thickavg      | ICC2 | 0.865 | 15.74  | 26 | 26  | 3.25E-10  | 0.7412  | 0.9296 | v6.0 vs. v7.1 | HNU |
| RH_pericalcarine_thickavg      | ICC3 | 0.794 | 39.63  | 26 | 234 | 4.39E-71  | 0.7117  | 0.8705 | v7.1          | HNU |
| RH_postcentral_surfavg         | ICC3 | 0.957 | 226.19 | 26 | 234 | 2.55E-150 | 0.9357  | 0.9749 | v5.3          | HNU |
| RH_postcentral_surfavg         | ICC2 | 0.949 | 36.92  | 26 | 26  | 1.15E-14  | 0.9040  | 0.9733 | v5.3 vs. v6.0 | HNU |
| RH_postcentral_surfavg         | ICC2 | 0.959 | 56.25  | 26 | 26  | 6.03E-17  | 0.9122  | 0.9795 | v5.3 vs. v7.1 | HNU |
| RH_postcentral_surfavg         | ICC3 | 0.974 | 370.58 | 26 | 234 | 1.45E-174 | 0.9599  | 0.9845 | v6.0          | HNU |
| RH_postcentral_surfavg         | ICC2 | 0.979 | 144.39 | 26 | 26  | 3.71E-22  | 0.9243  | 0.9912 | v6.0 vs. v7.1 | HNU |
| RH_postcentral_surfavg         | ICC3 | 0.954 | 209.12 | 26 | 234 | 1.65E-146 | 0.9308  | 0.9729 | v7.1          | HNU |
| RH_postcentral_thickavg        | ICC3 | 0.855 | 60.14  | 26 | 234 | 1.25E-88  | 0.7915  | 0.9111 | v5.3          | HNU |
| RH_postcentral_thickavg        | ICC2 | 0.534 | 26.76  | 26 | 26  | 5.96E-13  | -0.0300 | 0.8206 | v5.3 vs. v6.0 | HNU |
| RH_postcentral_thickavg        | ICC2 | 0.497 | 27.20  | 26 | 26  | 4.88E-13  | -0.0267 | 0.7996 | v5.3 vs. v7.1 | HNU |
| RH_postcentral_thickavg        | ICC3 | 0.868 | 66.73  | 26 | 234 | 3.44E-93  | 0.8086  | 0.9193 | v6.0          | HNU |
| RH_postcentral_thickavg        | ICC2 | 0.950 | 43.34  | 26 | 26  | 1.58E-15  | 0.9015  | 0.9743 | v6.0 vs. v7.1 | HNU |
| RH_postcentral_thickavg        | ICC3 | 0.793 | 39.30  | 26 | 234 | 9.59E-71  | 0.7099  | 0.8695 | v7.1          | HNU |
| RH_posteriorcingulate_surfavg  | ICC3 | 0.962 | 256.30 | 26 | 234 | 2.03E-156 | 0.9429  | 0.9778 | v5.3          | HNU |
| RH_posteriorcingulate_surfavg  | ICC2 | 0.950 | 42.35  | 26 | 26  | 2.10E-15  | 0.9042  | 0.9741 | v5.3 vs. v6.0 | HNU |
| RH_posteriorcingulate_surfavg  | ICC2 | 0.934 | 33.63  | 26 | 26  | 3.64E-14  | 0.8650  | 0.9663 | v5.3 vs. v7.1 | HNU |
| RH_posteriorcingulate_surfavg  | ICC3 | 0.973 | 361.37 | 26 | 234 | 2.55E-173 | 0.9589  | 0.9842 | v6.0          | HNU |
| RH_posteriorcingulate_surfavg  | ICC2 | 0.979 | 95.62  | 26 | 26  | 7.24E-20  | 0.9600  | 0.9890 | v6.0 vs. v7.1 | HNU |
| RH_posteriorcingulate_surfavg  | ICC3 | 0.978 | 455.22 | 26 | 234 | 9.03E-185 | 0.9671  | 0.9874 | v7.1          | HNU |
| RH_posteriorcingulate_thickavg | ICC3 | 0.711 | 25.61  | 26 | 234 | 2.61E-54  | 0.6094  | 0.8116 | v5.3          | HNU |
| RH_posteriorcingulate_thickavg | ICC2 | 0.743 | 7.79   | 26 | 26  | 7.36E-07  | 0.5375  | 0.8612 | v5.3 vs. v6.0 | HNU |
| RH_posteriorcingulate_thickavg | ICC2 | 0.618 | 6.36   | 26 | 26  | 5.60E-06  | 0.2129  | 0.8101 | v5.3 vs. v7.1 | HNU |

|                                      |      |       |        |    |     |           |         |        |               |     |
|--------------------------------------|------|-------|--------|----|-----|-----------|---------|--------|---------------|-----|
| RH_posteriorcingulate_thickavg       | ICC3 | 0.817 | 45.65  | 26 | 234 | 6.81E-77  | 0.7408  | 0.8858 | v6.0          | HNU |
| RH_posteriorcingulate_thickavg       | ICC2 | 0.514 | 7.29   | 26 | 26  | 1.43E-06  | -0.0364 | 0.7790 | v6.0 vs. v7.1 | HNU |
| RH_posteriorcingulate_thickavg       | ICC3 | 0.755 | 31.79  | 26 | 234 | 2.20E-62  | 0.6622  | 0.8430 | v7.1          | HNU |
| RH_precentral_surfvag                | ICC3 | 0.969 | 310.89 | 26 | 234 | 6.78E-166 | 0.9525  | 0.9816 | v5.3          | HNU |
| RH_precentral_surfvag                | ICC2 | 0.961 | 52.85  | 26 | 26  | 1.32E-16  | 0.9255  | 0.9796 | v5.3 vs. v6.0 | HNU |
| RH_precentral_surfvag                | ICC2 | 0.959 | 46.55  | 26 | 26  | 6.46E-16  | 0.9224  | 0.9784 | v5.3 vs. v7.1 | HNU |
| RH_precentral_surfvag                | ICC3 | 0.969 | 318.34 | 26 | 234 | 4.62E-167 | 0.9536  | 0.9820 | v6.0          | HNU |
| RH_precentral_surfvag                | ICC2 | 0.982 | 171.98 | 26 | 26  | 3.93E-23  | 0.9356  | 0.9926 | v6.0 vs. v7.1 | HNU |
| RH_precentral_surfvag                | ICC3 | 0.958 | 229.84 | 26 | 234 | 4.23E-151 | 0.9367  | 0.9753 | v7.1          | HNU |
| RH_precentral_thickavg               | ICC3 | 0.739 | 29.32  | 26 | 234 | 2.65E-59  | 0.6429  | 0.8318 | v5.3          | HNU |
| RH_precentral_thickavg               | ICC2 | 0.483 | 11.70  | 26 | 26  | 9.40E-09  | -0.0550 | 0.7789 | v5.3 vs. v6.0 | HNU |
| RH_precentral_thickavg               | ICC2 | 0.405 | 8.97   | 26 | 26  | 1.68E-07  | -0.0585 | 0.7208 | v5.3 vs. v7.1 | HNU |
| RH_precentral_thickavg               | ICC3 | 0.775 | 35.50  | 26 | 234 | 1.10E-66  | 0.6876  | 0.8573 | v6.0          | HNU |
| RH_precentral_thickavg               | ICC2 | 0.820 | 10.98  | 26 | 26  | 1.88E-08  | 0.6755  | 0.9032 | v6.0 vs. v7.1 | HNU |
| RH_precentral_thickavg               | ICC3 | 0.709 | 25.42  | 26 | 234 | 4.92E-54  | 0.6074  | 0.8104 | v7.1          | HNU |
| RH_precuneus_surfvag                 | ICC3 | 0.977 | 435.03 | 26 | 234 | 1.63E-182 | 0.9656  | 0.9868 | v5.3          | HNU |
| RH_precuneus_surfvag                 | ICC2 | 0.967 | 66.87  | 26 | 26  | 6.79E-18  | 0.9326  | 0.9831 | v5.3 vs. v6.0 | HNU |
| RH_precuneus_surfvag                 | ICC2 | 0.964 | 66.94  | 26 | 26  | 6.71E-18  | 0.9202  | 0.9826 | v5.3 vs. v7.1 | HNU |
| RH_precuneus_surfvag                 | ICC3 | 0.988 | 791.23 | 26 | 234 | 2.13E-212 | 0.9808  | 0.9927 | v6.0          | HNU |
| RH_precuneus_surfvag                 | ICC2 | 0.993 | 301.86 | 26 | 26  | 2.78E-26  | 0.9874  | 0.9965 | v6.0 vs. v7.1 | HNU |
| RH_precuneus_surfvag                 | ICC3 | 0.985 | 665.16 | 26 | 234 | 1.07E-203 | 0.9773  | 0.9913 | v7.1          | HNU |
| RH_precuneus_thickavg                | ICC3 | 0.777 | 35.88  | 26 | 234 | 4.20E-67  | 0.6899  | 0.8586 | v5.3          | HNU |
| RH_precuneus_thickavg                | ICC2 | 0.651 | 16.58  | 26 | 26  | 1.77E-10  | -0.0306 | 0.8698 | v5.3 vs. v6.0 | HNU |
| RH_precuneus_thickavg                | ICC2 | 0.728 | 13.81  | 26 | 26  | 1.45E-09  | 0.1355  | 0.8917 | v5.3 vs. v7.1 | HNU |
| RH_precuneus_thickavg                | ICC3 | 0.813 | 44.58  | 26 | 234 | 6.57E-76  | 0.7361  | 0.8834 | v6.0          | HNU |
| RH_precuneus_thickavg                | ICC2 | 0.872 | 19.82  | 26 | 26  | 2.18E-11  | 0.6910  | 0.9398 | v6.0 vs. v7.1 | HNU |
| RH_precuneus_thickavg                | ICC3 | 0.825 | 48.14  | 26 | 234 | 4.11E-79  | 0.7512  | 0.8911 | v7.1          | HNU |
| RH_Putamen                           | ICC3 | 0.918 | 112.52 | 26 | 234 | 5.81E-117 | 0.8779  | 0.9507 | v5.3          | HNU |
| RH_Putamen                           | ICC2 | 0.401 | 22.79  | 26 | 26  | 4.12E-12  | -0.0237 | 0.7314 | v5.3 vs. v6.0 | HNU |
| RH_Putamen                           | ICC2 | 0.439 | 20.18  | 26 | 26  | 1.76E-11  | -0.0307 | 0.7591 | v5.3 vs. v7.1 | HNU |
| RH_Putamen                           | ICC3 | 0.960 | 243.08 | 26 | 234 | 7.87E-154 | 0.9400  | 0.9766 | v6.0          | HNU |
| RH_Putamen                           | ICC2 | 0.961 | 96.30  | 26 | 26  | 6.62E-20  | 0.7926  | 0.9856 | v6.0 vs. v7.1 | HNU |
| RH_Putamen                           | ICC3 | 0.971 | 341.01 | 26 | 234 | 1.87E-170 | 0.9565  | 0.9832 | v7.1          | HNU |
| RH_rostralanteriorcingulate_surfvag  | ICC3 | 0.912 | 104.85 | 26 | 234 | 1.12E-113 | 0.8700  | 0.9472 | v5.3          | HNU |
| RH_rostralanteriorcingulate_surfvag  | ICC2 | 0.683 | 11.03  | 26 | 26  | 1.80E-08  | 0.1076  | 0.8680 | v5.3 vs. v6.0 | HNU |
| RH_rostralanteriorcingulate_surfvag  | ICC2 | 0.798 | 12.81  | 26 | 26  | 3.40E-09  | 0.5121  | 0.9058 | v5.3 vs. v7.1 | HNU |
| RH_rostralanteriorcingulate_surfvag  | ICC3 | 0.945 | 173.37 | 26 | 234 | 1.87E-137 | 0.9176  | 0.9675 | v6.0          | HNU |
| RH_rostralanteriorcingulate_surfvag  | ICC2 | 0.920 | 46.24  | 26 | 26  | 7.02E-16  | 0.6348  | 0.9701 | v6.0 vs. v7.1 | HNU |
| RH_rostralanteriorcingulate_surfvag  | ICC3 | 0.946 | 177.08 | 26 | 234 | 1.79E-138 | 0.9192  | 0.9681 | v7.1          | HNU |
| RH_rostralanteriorcingulate_thickavg | ICC3 | 0.559 | 13.66  | 26 | 234 | 7.83E-34  | 0.4398  | 0.6924 | v5.3          | HNU |
| RH_rostralanteriorcingulate_thickavg | ICC2 | 0.790 | 16.70  | 26 | 26  | 1.63E-10  | 0.2890  | 0.9162 | v5.3 vs. v6.0 | HNU |
| RH_rostralanteriorcingulate_thickavg | ICC2 | 0.852 | 12.86  | 26 | 26  | 3.24E-09  | 0.7341  | 0.9201 | v5.3 vs. v7.1 | HNU |
| RH_rostralanteriorcingulate_thickavg | ICC3 | 0.700 | 24.31  | 26 | 234 | 1.99E-52  | 0.5960  | 0.8033 | v6.0          | HNU |
| RH_rostralanteriorcingulate_thickavg | ICC2 | 0.754 | 33.25  | 26 | 26  | 4.19E-14  | -0.0100 | 0.9191 | v6.0 vs. v7.1 | HNU |

|                                      |      |       |         |    |     |           |         |        |               |     |
|--------------------------------------|------|-------|---------|----|-----|-----------|---------|--------|---------------|-----|
| RH_rostralanteriorcingulate_thickavg | ICC3 | 0.676 | 21.82   | 26 | 234 | 1.21E-48  | 0.5679  | 0.7852 | v7.1          | HNU |
| RH_rostralmiddlefrontal_surfavg      | ICC3 | 0.979 | 460.42  | 26 | 234 | 2.46E-185 | 0.9675  | 0.9875 | v5.3          | HNU |
| RH_rostralmiddlefrontal_surfavg      | ICC2 | 0.971 | 90.31   | 26 | 26  | 1.50E-19  | 0.9280  | 0.9868 | v5.3 vs. v6.0 | HNU |
| RH_rostralmiddlefrontal_surfavg      | ICC2 | 0.947 | 73.84   | 26 | 26  | 1.94E-18  | 0.7094  | 0.9807 | v5.3 vs. v7.1 | HNU |
| RH_rostralmiddlefrontal_surfavg      | ICC3 | 0.990 | 1027.49 | 26 | 234 | 1.58E-225 | 0.9852  | 0.9944 | v6.0          | HNU |
| RH_rostralmiddlefrontal_surfavg      | ICC2 | 0.983 | 171.93  | 26 | 26  | 3.94E-23  | 0.9422  | 0.9927 | v6.0 vs. v7.1 | HNU |
| RH_rostralmiddlefrontal_surfavg      | ICC3 | 0.986 | 681.79  | 26 | 234 | 6.21E-205 | 0.9778  | 0.9915 | v7.1          | HNU |
| RH_rostralmiddlefrontal_thickavg     | ICC3 | 0.787 | 37.84   | 26 | 234 | 3.13E-69  | 0.7017  | 0.8651 | v5.3          | HNU |
| RH_rostralmiddlefrontal_thickavg     | ICC2 | 0.644 | 15.91   | 26 | 26  | 2.86E-10  | -0.0319 | 0.8659 | v5.3 vs. v6.0 | HNU |
| RH_rostralmiddlefrontal_thickavg     | ICC2 | 0.580 | 6.61    | 26 | 26  | 3.82E-06  | 0.0859  | 0.8007 | v5.3 vs. v7.1 | HNU |
| RH_rostralmiddlefrontal_thickavg     | ICC3 | 0.803 | 41.88   | 26 | 234 | 2.47E-73  | 0.7233  | 0.8767 | v6.0          | HNU |
| RH_rostralmiddlefrontal_thickavg     | ICC2 | 0.817 | 10.54   | 26 | 26  | 2.96E-08  | 0.6746  | 0.9010 | v6.0 vs. v7.1 | HNU |
| RH_rostralmiddlefrontal_thickavg     | ICC3 | 0.741 | 29.68   | 26 | 234 | 9.16E-60  | 0.6458  | 0.8336 | v7.1          | HNU |
| RH_superiorfrontal_surfavg           | ICC3 | 0.986 | 680.93  | 26 | 234 | 7.18E-205 | 0.9778  | 0.9915 | v5.3          | HNU |
| RH_superiorfrontal_surfavg           | ICC2 | 0.980 | 111.22  | 26 | 26  | 1.05E-20  | 0.9614  | 0.9900 | v5.3 vs. v6.0 | HNU |
| RH_superiorfrontal_surfavg           | ICC2 | 0.972 | 115.97  | 26 | 26  | 6.16E-21  | 0.8909  | 0.9889 | v5.3 vs. v7.1 | HNU |
| RH_superiorfrontal_surfavg           | ICC3 | 0.993 | 1412.39 | 26 | 234 | 1.46E-241 | 0.9892  | 0.9959 | v6.0          | HNU |
| RH_superiorfrontal_surfavg           | ICC2 | 0.992 | 392.47  | 26 | 26  | 9.33E-28  | 0.9638  | 0.9967 | v6.0 vs. v7.1 | HNU |
| RH_superiorfrontal_surfavg           | ICC3 | 0.984 | 633.30  | 26 | 234 | 3.06E-201 | 0.9762  | 0.9909 | v7.1          | HNU |
| RH_superiorfrontal_thickavg          | ICC3 | 0.800 | 41.00   | 26 | 234 | 1.84E-72  | 0.7188  | 0.8743 | v5.3          | HNU |
| RH_superiorfrontal_thickavg          | ICC2 | 0.686 | 18.48   | 26 | 26  | 4.97E-11  | -0.0171 | 0.8857 | v5.3 vs. v6.0 | HNU |
| RH_superiorfrontal_thickavg          | ICC2 | 0.669 | 8.03    | 26 | 26  | 5.37E-07  | 0.2394  | 0.8444 | v5.3 vs. v7.1 | HNU |
| RH_superiorfrontal_thickavg          | ICC3 | 0.831 | 50.13   | 26 | 234 | 8.09E-81  | 0.7590  | 0.8950 | v6.0          | HNU |
| RH_superiorfrontal_thickavg          | ICC2 | 0.817 | 11.81   | 26 | 26  | 8.43E-09  | 0.6436  | 0.9052 | v6.0 vs. v7.1 | HNU |
| RH_superiorfrontal_thickavg          | ICC3 | 0.769 | 34.29   | 26 | 234 | 2.52E-65  | 0.6797  | 0.8530 | v7.1          | HNU |
| RH_superiorparietal_surfavg          | ICC3 | 0.971 | 341.28  | 26 | 234 | 1.71E-170 | 0.9566  | 0.9832 | v5.3          | HNU |
| RH_superiorparietal_surfavg          | ICC2 | 0.911 | 21.15   | 26 | 26  | 1.01E-11  | 0.8362  | 0.9528 | v5.3 vs. v6.0 | HNU |
| RH_superiorparietal_surfavg          | ICC2 | 0.910 | 23.08   | 26 | 26  | 3.54E-12  | 0.8297  | 0.9528 | v5.3 vs. v7.1 | HNU |
| RH_superiorparietal_surfavg          | ICC3 | 0.983 | 573.03  | 26 | 234 | 3.06E-196 | 0.9737  | 0.9900 | v6.0          | HNU |
| RH_superiorparietal_surfavg          | ICC2 | 0.990 | 306.16  | 26 | 26  | 2.32E-26  | 0.9681  | 0.9959 | v6.0 vs. v7.1 | HNU |
| RH_superiorparietal_surfavg          | ICC3 | 0.947 | 180.61  | 26 | 234 | 2.01E-139 | 0.9207  | 0.9687 | v7.1          | HNU |
| RH_superiorparietal_thickavg         | ICC3 | 0.811 | 43.83   | 26 | 234 | 3.33E-75  | 0.7327  | 0.8816 | v5.3          | HNU |
| RH_superiorparietal_thickavg         | ICC2 | 0.545 | 14.62   | 26 | 26  | 7.60E-10  | -0.0503 | 0.8184 | v5.3 vs. v6.0 | HNU |
| RH_superiorparietal_thickavg         | ICC2 | 0.481 | 11.12   | 26 | 26  | 1.64E-08  | -0.0565 | 0.7768 | v5.3 vs. v7.1 | HNU |
| RH_superiorparietal_thickavg         | ICC3 | 0.785 | 37.47   | 26 | 234 | 7.82E-69  | 0.6995  | 0.8639 | v6.0          | HNU |
| RH_superiorparietal_thickavg         | ICC2 | 0.872 | 14.65   | 26 | 26  | 7.39E-10  | 0.7693  | 0.9315 | v6.0 vs. v7.1 | HNU |
| RH_superiorparietal_thickavg         | ICC3 | 0.748 | 30.71   | 26 | 234 | 4.69E-61  | 0.6540  | 0.8383 | v7.1          | HNU |
| RH_superiortemporal_surfavg          | ICC3 | 0.959 | 232.76  | 26 | 234 | 1.03E-151 | 0.9374  | 0.9756 | v5.3          | HNU |
| RH_superiortemporal_surfavg          | ICC2 | 0.944 | 65.84   | 26 | 26  | 8.27E-18  | 0.7301  | 0.9791 | v5.3 vs. v6.0 | HNU |
| RH_superiortemporal_surfavg          | ICC2 | 0.890 | 54.12   | 26 | 26  | 9.78E-17  | 0.2353  | 0.9648 | v5.3 vs. v7.1 | HNU |
| RH_superiortemporal_surfavg          | ICC3 | 0.945 | 171.26  | 26 | 234 | 7.23E-137 | 0.9167  | 0.9671 | v6.0          | HNU |
| RH_superiortemporal_surfavg          | ICC2 | 0.963 | 93.00   | 26 | 26  | 1.03E-19  | 0.8347  | 0.9857 | v6.0 vs. v7.1 | HNU |
| RH_superiortemporal_surfavg          | ICC3 | 0.951 | 196.15  | 26 | 234 | 2.09E-143 | 0.9265  | 0.9711 | v7.1          | HNU |
| RH_superiortemporal_thickavg         | ICC3 | 0.725 | 27.41   | 26 | 234 | 8.59E-57  | 0.6264  | 0.8220 | v5.3          | HNU |

|                              |      |       |         |    |     |           |         |        |               |     |
|------------------------------|------|-------|---------|----|-----|-----------|---------|--------|---------------|-----|
| RH_superiortemporal_thickavg | ICC2 | 0.640 | 14.93   | 26 | 26  | 5.97E-10  | -0.0296 | 0.8629 | v5.3 vs. v6.0 | HNU |
| RH_superiortemporal_thickavg | ICC2 | 0.715 | 11.01   | 26 | 26  | 1.83E-08  | 0.2152  | 0.8777 | v5.3 vs. v7.1 | HNU |
| RH_superiortemporal_thickavg | ICC3 | 0.773 | 35.04   | 26 | 234 | 3.60E-66  | 0.6846  | 0.8557 | v6.0          | HNU |
| RH_superiortemporal_thickavg | ICC2 | 0.827 | 15.90   | 26 | 26  | 2.87E-10  | 0.5393  | 0.9224 | v6.0 vs. v7.1 | HNU |
| RH_superiortemporal_thickavg | ICC3 | 0.744 | 30.01   | 26 | 234 | 3.53E-60  | 0.6485  | 0.8351 | v7.1          | HNU |
| RH_supramarginal_surfavg     | ICC3 | 0.954 | 206.90  | 26 | 234 | 5.44E-146 | 0.9301  | 0.9726 | v5.3          | HNU |
| RH_supramarginal_surfavg     | ICC2 | 0.900 | 18.37   | 26 | 26  | 5.33E-11  | 0.8156  | 0.9470 | v5.3 vs. v6.0 | HNU |
| RH_supramarginal_surfavg     | ICC2 | 0.885 | 15.81   | 26 | 26  | 3.08E-10  | 0.7887  | 0.9386 | v5.3 vs. v7.1 | HNU |
| RH_supramarginal_surfavg     | ICC3 | 0.947 | 180.31  | 26 | 234 | 2.42E-139 | 0.9205  | 0.9687 | v6.0          | HNU |
| RH_supramarginal_surfavg     | ICC2 | 0.986 | 145.92  | 26 | 26  | 3.24E-22  | 0.9735  | 0.9928 | v6.0 vs. v7.1 | HNU |
| RH_supramarginal_surfavg     | ICC3 | 0.922 | 119.70  | 26 | 234 | 7.38E-120 | 0.8845  | 0.9535 | v7.1          | HNU |
| RH_supramarginal_thickavg    | ICC3 | 0.722 | 27.01   | 26 | 234 | 2.99E-56  | 0.6227  | 0.8198 | v5.3          | HNU |
| RH_supramarginal_thickavg    | ICC2 | 0.758 | 28.45   | 26 | 26  | 2.82E-13  | 0.0044  | 0.9186 | v5.3 vs. v6.0 | HNU |
| RH_supramarginal_thickavg    | ICC2 | 0.806 | 21.93   | 26 | 26  | 6.53E-12  | 0.2061  | 0.9286 | v5.3 vs. v7.1 | HNU |
| RH_supramarginal_thickavg    | ICC3 | 0.801 | 41.23   | 26 | 234 | 1.07E-72  | 0.7201  | 0.8749 | v6.0          | HNU |
| RH_supramarginal_thickavg    | ICC2 | 0.898 | 21.57   | 26 | 26  | 7.98E-12  | 0.7977  | 0.9479 | v6.0 vs. v7.1 | HNU |
| RH_supramarginal_thickavg    | ICC3 | 0.769 | 34.34   | 26 | 234 | 2.25E-65  | 0.6800  | 0.8531 | v7.1          | HNU |
| RH_SurfArea                  | ICC3 | 0.988 | 853.25  | 26 | 234 | 3.47E-216 | 0.9822  | 0.9932 | v5.3          | HNU |
| RH_SurfArea                  | ICC2 | 0.984 | 807.70  | 26 | 26  | 8.11E-32  | 0.4806  | 0.9957 | v5.3 vs. v6.0 | HNU |
| RH_SurfArea                  | ICC2 | 0.935 | 291.10  | 26 | 26  | 4.44E-26  | 0.0942  | 0.9828 | v5.3 vs. v7.1 | HNU |
| RH_SurfArea                  | ICC3 | 0.991 | 1116.33 | 26 | 234 | 1.05E-229 | 0.9863  | 0.9948 | v6.0          | HNU |
| RH_SurfArea                  | ICC2 | 0.979 | 550.45  | 26 | 26  | 1.17E-29  | 0.4461  | 0.9943 | v6.0 vs. v7.1 | HNU |
| RH_SurfArea                  | ICC3 | 0.991 | 1064.54 | 26 | 234 | 2.60E-227 | 0.9857  | 0.9946 | v7.1          | HNU |
| RH_temporalpole_surfavg      | ICC3 | 0.630 | 18.01   | 26 | 234 | 3.11E-42  | 0.5162  | 0.7499 | v5.3          | HNU |
| RH_temporalpole_surfavg      | ICC2 | 0.701 | 7.34    | 26 | 26  | 1.34E-06  | 0.4179  | 0.8452 | v5.3 vs. v6.0 | HNU |
| RH_temporalpole_surfavg      | ICC2 | 0.347 | 4.17    | 26 | 26  | 2.61E-04  | -0.0636 | 0.6425 | v5.3 vs. v7.1 | HNU |
| RH_temporalpole_surfavg      | ICC3 | 0.742 | 29.79   | 26 | 234 | 6.58E-60  | 0.6467  | 0.8341 | v6.0          | HNU |
| RH_temporalpole_surfavg      | ICC2 | 0.544 | 7.53    | 26 | 26  | 1.03E-06  | -0.0151 | 0.7950 | v6.0 vs. v7.1 | HNU |
| RH_temporalpole_surfavg      | ICC3 | 0.833 | 50.77   | 26 | 234 | 2.38E-81  | 0.7613  | 0.8962 | v7.1          | HNU |
| RH_temporalpole_thickavg     | ICC3 | 0.362 | 6.66    | 26 | 234 | 7.41E-17  | 0.2492  | 0.5115 | v5.3          | HNU |
| RH_temporalpole_thickavg     | ICC2 | 0.756 | 7.29    | 26 | 26  | 1.44E-06  | 0.5806  | 0.8650 | v5.3 vs. v6.0 | HNU |
| RH_temporalpole_thickavg     | ICC2 | 0.781 | 8.01    | 26 | 26  | 5.50E-07  | 0.6179  | 0.8800 | v5.3 vs. v7.1 | HNU |
| RH_temporalpole_thickavg     | ICC3 | 0.388 | 7.35    | 26 | 234 | 9.53E-19  | 0.2733  | 0.5380 | v6.0          | HNU |
| RH_temporalpole_thickavg     | ICC2 | 0.762 | 8.18    | 26 | 26  | 4.41E-07  | 0.5792  | 0.8705 | v6.0 vs. v7.1 | HNU |
| RH_temporalpole_thickavg     | ICC3 | 0.418 | 8.18    | 26 | 234 | 5.69E-21  | 0.3007  | 0.5666 | v7.1          | HNU |
| RH_Thalamus                  | ICC3 | 0.723 | 27.09   | 26 | 234 | 2.32E-56  | 0.6235  | 0.8202 | v5.3          | HNU |
| RH_Thalamus                  | ICC2 | 0.875 | 22.86   | 26 | 26  | 3.97E-12  | 0.6354  | 0.9454 | v5.3 vs. v6.0 | HNU |
| RH_Thalamus                  | ICC2 | 0.720 | 15.97   | 26 | 26  | 2.74E-10  | 0.0572  | 0.8942 | v5.3 vs. v7.1 | HNU |
| RH_Thalamus                  | ICC3 | 0.876 | 71.34   | 26 | 234 | 3.74E-96  | 0.8189  | 0.9241 | v6.0          | HNU |
| RH_Thalamus                  | ICC2 | 0.895 | 30.88   | 26 | 26  | 1.04E-13  | 0.6186  | 0.9575 | v6.0 vs. v7.1 | HNU |
| RH_Thalamus                  | ICC3 | 0.870 | 67.75   | 26 | 234 | 7.29E-94  | 0.8110  | 0.9204 | v7.1          | HNU |
| RH_Thickness                 | ICC3 | 0.770 | 34.56   | 26 | 234 | 1.26E-65  | 0.6815  | 0.8540 | v5.3          | HNU |
| RH_Thickness                 | ICC2 | 0.515 | 13.41   | 26 | 26  | 2.03E-09  | -0.0521 | 0.8002 | v5.3 vs. v6.0 | HNU |
| RH_Thickness                 | ICC2 | 0.592 | 7.11    | 26 | 26  | 1.86E-06  | 0.0809  | 0.8106 | v5.3 vs. v7.1 | HNU |

|                                     |      |       |        |    |     |           |         |        |               |     |
|-------------------------------------|------|-------|--------|----|-----|-----------|---------|--------|---------------|-----|
| RH_Thickness                        | ICC3 | 0.830 | 49.71  | 26 | 234 | 1.86E-80  | 0.7574  | 0.8942 | v6.0          | HNU |
| RH_Thickness                        | ICC2 | 0.712 | 9.20   | 26 | 26  | 1.28E-07  | 0.3196  | 0.8658 | v6.0 vs. v7.1 | HNU |
| RH_Thickness                        | ICC3 | 0.770 | 34.47  | 26 | 234 | 1.56E-65  | 0.6809  | 0.8537 | v7.1          | HNU |
| RH_transversetemporal_surfavg       | ICC3 | 0.883 | 76.45  | 26 | 234 | 3.00E-99  | 0.8292  | 0.9289 | v5.3          | HNU |
| RH_transversetemporal_surfavg       | ICC2 | 0.841 | 11.61  | 26 | 26  | 1.02E-08  | 0.7160  | 0.9137 | v5.3 vs. v6.0 | HNU |
| RH_transversetemporal_surfavg       | ICC2 | 0.801 | 8.83   | 26 | 26  | 1.99E-07  | 0.6488  | 0.8917 | v5.3 vs. v7.1 | HNU |
| RH_transversetemporal_surfavg       | ICC3 | 0.937 | 148.67 | 26 | 234 | 4.21E-130 | 0.9051  | 0.9622 | v6.0          | HNU |
| RH_transversetemporal_surfavg       | ICC2 | 0.925 | 25.15  | 26 | 26  | 1.26E-12  | 0.8605  | 0.9602 | v6.0 vs. v7.1 | HNU |
| RH_transversetemporal_surfavg       | ICC3 | 0.938 | 153.19 | 26 | 234 | 1.57E-131 | 0.9076  | 0.9633 | v7.1          | HNU |
| RH_transversetemporal_thickavg      | ICC3 | 0.809 | 43.36  | 26 | 234 | 9.21E-75  | 0.7305  | 0.8804 | v5.3          | HNU |
| RH_transversetemporal_thickavg      | ICC2 | 0.670 | 19.97  | 26 | 26  | 1.99E-11  | -0.0306 | 0.8811 | v5.3 vs. v6.0 | HNU |
| RH_transversetemporal_thickavg      | ICC2 | 0.686 | 16.78  | 26 | 26  | 1.54E-10  | -0.0067 | 0.8834 | v5.3 vs. v7.1 | HNU |
| RH_transversetemporal_thickavg      | ICC3 | 0.808 | 43.00  | 26 | 234 | 2.05E-74  | 0.7287  | 0.8795 | v6.0          | HNU |
| RH_transversetemporal_thickavg      | ICC2 | 0.885 | 17.24  | 26 | 26  | 1.12E-10  | 0.7881  | 0.9385 | v6.0 vs. v7.1 | HNU |
| RH_transversetemporal_thickavg      | ICC3 | 0.820 | 46.62  | 26 | 234 | 9.18E-78  | 0.7450  | 0.8879 | v7.1          | HNU |
| SUM_bankssts_surfavg                | ICC3 | 0.917 | 110.84 | 26 | 234 | 2.92E-116 | 0.8763  | 0.9499 | v5.3          | HNU |
| SUM_bankssts_surfavg                | ICC2 | 0.749 | 10.20  | 26 | 26  | 4.24E-08  | 0.4147  | 0.8814 | v5.3 vs. v6.0 | HNU |
| SUM_bankssts_surfavg                | ICC2 | 0.706 | 7.54   | 26 | 26  | 1.02E-06  | 0.4203  | 0.8487 | v5.3 vs. v7.1 | HNU |
| SUM_bankssts_surfavg                | ICC3 | 0.956 | 216.90 | 26 | 234 | 2.80E-148 | 0.9331  | 0.9738 | v6.0          | HNU |
| SUM_bankssts_surfavg                | ICC2 | 0.963 | 51.92  | 26 | 26  | 1.65E-16  | 0.9306  | 0.9808 | v6.0 vs. v7.1 | HNU |
| SUM_bankssts_surfavg                | ICC3 | 0.956 | 218.53 | 26 | 234 | 1.21E-148 | 0.9336  | 0.9740 | v7.1          | HNU |
| SUM_caudalanteriorcingulate_surfavg | ICC3 | 0.980 | 483.74 | 26 | 234 | 8.57E-188 | 0.9690  | 0.9881 | v5.3          | HNU |
| SUM_caudalanteriorcingulate_surfavg | ICC2 | 0.895 | 45.24  | 26 | 26  | 9.22E-16  | 0.3767  | 0.9642 | v5.3 vs. v6.0 | HNU |
| SUM_caudalanteriorcingulate_surfavg | ICC2 | 0.945 | 51.53  | 26 | 26  | 1.81E-16  | 0.8398  | 0.9761 | v5.3 vs. v7.1 | HNU |
| SUM_caudalanteriorcingulate_surfavg | ICC3 | 0.986 | 712.90 | 26 | 234 | 3.61E-207 | 0.9788  | 0.9919 | v6.0          | HNU |
| SUM_caudalanteriorcingulate_surfavg | ICC2 | 0.974 | 163.83 | 26 | 26  | 7.33E-23  | 0.8267  | 0.9911 | v6.0 vs. v7.1 | HNU |
| SUM_caudalanteriorcingulate_surfavg | ICC3 | 0.988 | 836.64 | 26 | 234 | 3.37E-215 | 0.9819  | 0.9931 | v7.1          | HNU |
| SUM_caudalmiddlefrontal_surfavg     | ICC3 | 0.981 | 507.98 | 26 | 234 | 3.14E-190 | 0.9704  | 0.9887 | v5.3          | HNU |
| SUM_caudalmiddlefrontal_surfavg     | ICC2 | 0.907 | 22.93  | 26 | 26  | 3.83E-12  | 0.8214  | 0.9518 | v5.3 vs. v6.0 | HNU |
| SUM_caudalmiddlefrontal_surfavg     | ICC2 | 0.944 | 37.62  | 26 | 26  | 9.15E-15  | 0.8917  | 0.9708 | v5.3 vs. v7.1 | HNU |
| SUM_caudalmiddlefrontal_surfavg     | ICC3 | 0.986 | 684.85 | 26 | 234 | 3.70E-205 | 0.9779  | 0.9916 | v6.0          | HNU |
| SUM_caudalmiddlefrontal_surfavg     | ICC2 | 0.984 | 130.07 | 26 | 26  | 1.42E-21  | 0.9695  | 0.9917 | v6.0 vs. v7.1 | HNU |
| SUM_caudalmiddlefrontal_surfavg     | ICC3 | 0.988 | 820.99 | 26 | 234 | 2.99E-214 | 0.9815  | 0.9930 | v7.1          | HNU |
| SUM_cuneus_surfavg                  | ICC3 | 0.940 | 157.77 | 26 | 234 | 6.15E-133 | 0.9101  | 0.9644 | v5.3          | HNU |
| SUM_cuneus_surfavg                  | ICC2 | 0.897 | 37.11  | 26 | 26  | 1.08E-14  | 0.5213  | 0.9616 | v5.3 vs. v6.0 | HNU |
| SUM_cuneus_surfavg                  | ICC2 | 0.765 | 33.09  | 26 | 26  | 4.45E-14  | -0.0021 | 0.9228 | v5.3 vs. v7.1 | HNU |
| SUM_cuneus_surfavg                  | ICC3 | 0.972 | 345.35 | 26 | 234 | 4.45E-171 | 0.9570  | 0.9834 | v6.0          | HNU |
| SUM_cuneus_surfavg                  | ICC2 | 0.936 | 102.53 | 26 | 26  | 2.97E-20  | 0.3557  | 0.9804 | v6.0 vs. v7.1 | HNU |
| SUM_cuneus_surfavg                  | ICC3 | 0.964 | 268.58 | 26 | 234 | 1.04E-158 | 0.9454  | 0.9788 | v7.1          | HNU |
| SUM_entorhinal_surfavg              | ICC3 | 0.774 | 35.26  | 26 | 234 | 2.01E-66  | 0.6861  | 0.8565 | v5.3          | HNU |
| SUM_entorhinal_surfavg              | ICC2 | 0.469 | 4.15   | 26 | 26  | 2.69E-04  | 0.0656  | 0.7127 | v5.3 vs. v6.0 | HNU |
| SUM_entorhinal_surfavg              | ICC2 | 0.577 | 4.71   | 26 | 26  | 9.21E-05  | 0.2643  | 0.7670 | v5.3 vs. v7.1 | HNU |
| SUM_entorhinal_surfavg              | ICC3 | 0.847 | 56.31  | 26 | 234 | 8.85E-86  | 0.7802  | 0.9056 | v6.0          | HNU |
| SUM_entorhinal_surfavg              | ICC2 | 0.902 | 26.72  | 26 | 26  | 6.06E-13  | 0.7505  | 0.9550 | v6.0 vs. v7.1 | HNU |

|                                  |      |       |        |    |     |           |         |        |               |     |
|----------------------------------|------|-------|--------|----|-----|-----------|---------|--------|---------------|-----|
| SUM_entorhinal_surfavg           | ICC3 | 0.876 | 71.64  | 26 | 234 | 2.45E-96  | 0.8196  | 0.9244 | v7.1          | HNU |
| SUM_frontalpole_surfavg          | ICC3 | 0.667 | 21.07  | 26 | 234 | 1.95E-47  | 0.5586  | 0.7791 | v5.3          | HNU |
| SUM_frontalpole_surfavg          | ICC2 | 0.279 | 4.57   | 26 | 26  | 1.20E-04  | -0.0688 | 0.5894 | v5.3 vs. v6.0 | HNU |
| SUM_frontalpole_surfavg          | ICC2 | 0.194 | 8.98   | 26 | 26  | 1.66E-07  | -0.0257 | 0.4963 | v5.3 vs. v7.1 | HNU |
| SUM_frontalpole_surfavg          | ICC3 | 0.806 | 42.66  | 26 | 234 | 4.30E-74  | 0.7271  | 0.8787 | v6.0          | HNU |
| SUM_frontalpole_surfavg          | ICC2 | 0.537 | 9.70   | 26 | 26  | 7.29E-08  | -0.0502 | 0.8030 | v6.0 vs. v7.1 | HNU |
| SUM_frontalpole_surfavg          | ICC3 | 0.832 | 50.51  | 26 | 234 | 3.86E-81  | 0.7604  | 0.8958 | v7.1          | HNU |
| SUM_fusiform_surfavg             | ICC3 | 0.956 | 220.80 | 26 | 234 | 3.79E-149 | 0.9343  | 0.9743 | v5.3          | HNU |
| SUM_fusiform_surfavg             | ICC2 | 0.771 | 17.60  | 26 | 26  | 8.82E-11  | 0.1703  | 0.9128 | v5.3 vs. v6.0 | HNU |
| SUM_fusiform_surfavg             | ICC2 | 0.767 | 13.42  | 26 | 26  | 2.01E-09  | 0.3130  | 0.9012 | v5.3 vs. v7.1 | HNU |
| SUM_fusiform_surfavg             | ICC3 | 0.981 | 523.38 | 26 | 234 | 1.02E-191 | 0.9713  | 0.9890 | v6.0          | HNU |
| SUM_fusiform_surfavg             | ICC2 | 0.986 | 143.24 | 26 | 26  | 4.12E-22  | 0.9724  | 0.9925 | v6.0 vs. v7.1 | HNU |
| SUM_fusiform_surfavg             | ICC3 | 0.977 | 433.19 | 26 | 234 | 2.64E-182 | 0.9655  | 0.9867 | v7.1          | HNU |
| SUM_inferiorparietal_surfavg     | ICC3 | 0.982 | 537.49 | 26 | 234 | 4.79E-193 | 0.9720  | 0.9893 | v5.3          | HNU |
| SUM_inferiorparietal_surfavg     | ICC2 | 0.941 | 33.80  | 26 | 26  | 3.43E-14  | 0.8887  | 0.9687 | v5.3 vs. v6.0 | HNU |
| SUM_inferiorparietal_surfavg     | ICC2 | 0.941 | 32.78  | 26 | 26  | 4.98E-14  | 0.8896  | 0.9687 | v5.3 vs. v7.1 | HNU |
| SUM_inferiorparietal_surfavg     | ICC3 | 0.982 | 540.27 | 26 | 234 | 2.65E-193 | 0.9722  | 0.9893 | v6.0          | HNU |
| SUM_inferiorparietal_surfavg     | ICC2 | 0.977 | 184.70 | 26 | 26  | 1.57E-23  | 0.8436  | 0.9921 | v6.0 vs. v7.1 | HNU |
| SUM_inferiorparietal_surfavg     | ICC3 | 0.981 | 523.61 | 26 | 234 | 9.69E-192 | 0.9713  | 0.9890 | v7.1          | HNU |
| SUM_inferiortemporal_surfavg     | ICC3 | 0.949 | 188.41 | 26 | 234 | 1.84E-141 | 0.9237  | 0.9700 | v5.3          | HNU |
| SUM_inferiortemporal_surfavg     | ICC2 | 0.878 | 38.23  | 26 | 26  | 7.48E-15  | 0.3332  | 0.9579 | v5.3 vs. v6.0 | HNU |
| SUM_inferiortemporal_surfavg     | ICC2 | 0.859 | 30.80  | 26 | 26  | 1.07E-13  | 0.3177  | 0.9495 | v5.3 vs. v7.1 | HNU |
| SUM_inferiortemporal_surfavg     | ICC3 | 0.945 | 171.81 | 26 | 234 | 5.09E-137 | 0.9169  | 0.9672 | v6.0          | HNU |
| SUM_inferiortemporal_surfavg     | ICC2 | 0.984 | 123.79 | 26 | 26  | 2.67E-21  | 0.9703  | 0.9919 | v6.0 vs. v7.1 | HNU |
| SUM_inferiortemporal_surfavg     | ICC3 | 0.965 | 274.47 | 26 | 234 | 8.99E-160 | 0.9465  | 0.9792 | v7.1          | HNU |
| SUM_insula_surfavg               | ICC3 | 0.887 | 79.79  | 26 | 234 | 3.58E-101 | 0.8353  | 0.9317 | v5.3          | HNU |
| SUM_insula_surfavg               | ICC2 | 0.642 | 21.93  | 26 | 26  | 6.53E-12  | -0.0382 | 0.8710 | v5.3 vs. v6.0 | HNU |
| SUM_insula_surfavg               | ICC2 | 0.649 | 16.77  | 26 | 26  | 1.55E-10  | -0.0324 | 0.8691 | v5.3 vs. v7.1 | HNU |
| SUM_insula_surfavg               | ICC3 | 0.890 | 82.01  | 26 | 234 | 2.05E-102 | 0.8391  | 0.9334 | v6.0          | HNU |
| SUM_insula_surfavg               | ICC2 | 0.889 | 16.63  | 26 | 26  | 1.71E-10  | 0.7967  | 0.9406 | v6.0 vs. v7.1 | HNU |
| SUM_insula_surfavg               | ICC3 | 0.900 | 90.74  | 26 | 234 | 5.12E-107 | 0.8525  | 0.9395 | v7.1          | HNU |
| SUM_isthmuscingulate_surfavg     | ICC3 | 0.895 | 86.60  | 26 | 234 | 6.90E-105 | 0.8464  | 0.9367 | v5.3          | HNU |
| SUM_isthmuscingulate_surfavg     | ICC2 | 0.826 | 13.95  | 26 | 26  | 1.30E-09  | 0.6089  | 0.9157 | v5.3 vs. v6.0 | HNU |
| SUM_isthmuscingulate_surfavg     | ICC2 | 0.844 | 14.32  | 26 | 26  | 9.60E-10  | 0.6856  | 0.9208 | v5.3 vs. v7.1 | HNU |
| SUM_isthmuscingulate_surfavg     | ICC3 | 0.983 | 562.47 | 26 | 234 | 2.59E-195 | 0.9732  | 0.9898 | v6.0          | HNU |
| SUM_isthmuscingulate_surfavg     | ICC2 | 0.976 | 91.04  | 26 | 26  | 1.35E-19  | 0.9529  | 0.9878 | v6.0 vs. v7.1 | HNU |
| SUM_isthmuscingulate_surfavg     | ICC3 | 0.982 | 554.58 | 26 | 234 | 1.32E-194 | 0.9729  | 0.9896 | v7.1          | HNU |
| SUM_lateraloccipital_surfavg     | ICC3 | 0.970 | 327.40 | 26 | 234 | 1.92E-168 | 0.9548  | 0.9825 | v5.3          | HNU |
| SUM_lateraloccipital_surfavg     | ICC2 | 0.792 | 32.65  | 26 | 26  | 5.24E-14  | 0.0314  | 0.9315 | v5.3 vs. v6.0 | HNU |
| SUM_lateraloccipital_surfavg     | ICC2 | 0.662 | 35.46  | 26 | 26  | 1.90E-14  | -0.0280 | 0.8848 | v5.3 vs. v7.1 | HNU |
| SUM_lateraloccipital_surfavg     | ICC3 | 0.984 | 632.59 | 26 | 234 | 3.48E-201 | 0.9761  | 0.9909 | v6.0          | HNU |
| SUM_lateraloccipital_surfavg     | ICC2 | 0.944 | 140.71 | 26 | 26  | 5.17E-22  | 0.3116  | 0.9836 | v6.0 vs. v7.1 | HNU |
| SUM_lateraloccipital_surfavg     | ICC3 | 0.979 | 474.40 | 26 | 234 | 7.99E-187 | 0.9684  | 0.9879 | v7.1          | HNU |
| SUM_lateralorbitofrontal_surfavg | ICC3 | 0.829 | 49.60  | 26 | 234 | 2.28E-80  | 0.7570  | 0.8940 | v5.3          | HNU |



|                                  |      |       |         |    |     |           |         |        |               |     |
|----------------------------------|------|-------|---------|----|-----|-----------|---------|--------|---------------|-----|
| SUM_lateralorbitofrontal_surfavg | ICC2 | 0.924 | 58.72   | 26 | 26  | 3.51E-17  | 0.5259  | 0.9737 | v5.3 vs. v6.0 | HNU |
| SUM_lateralorbitofrontal_surfavg | ICC2 | 0.736 | 21.35   | 26 | 26  | 9.02E-12  | 0.0161  | 0.9064 | v5.3 vs. v7.1 | HNU |
| SUM_lateralorbitofrontal_surfavg | ICC3 | 0.857 | 60.75   | 26 | 234 | 4.49E-89  | 0.7933  | 0.9119 | v6.0          | HNU |
| SUM_lateralorbitofrontal_surfavg | ICC2 | 0.883 | 40.95   | 26 | 26  | 3.19E-15  | 0.3295  | 0.9599 | v6.0 vs. v7.1 | HNU |
| SUM_lateralorbitofrontal_surfavg | ICC3 | 0.831 | 50.33   | 26 | 234 | 5.56E-81  | 0.7597  | 0.8954 | v7.1          | HNU |
| SUM_lingual_surfavg              | ICC3 | 0.929 | 132.44  | 26 | 234 | 1.28E-124 | 0.8945  | 0.9578 | v5.3          | HNU |
| SUM_lingual_surfavg              | ICC2 | 0.865 | 13.83   | 26 | 26  | 1.43E-09  | 0.7573  | 0.9276 | v5.3 vs. v6.0 | HNU |
| SUM_lingual_surfavg              | ICC2 | 0.748 | 10.22   | 26 | 26  | 4.14E-08  | 0.4062  | 0.8812 | v5.3 vs. v7.1 | HNU |
| SUM_lingual_surfavg              | ICC3 | 0.972 | 348.03  | 26 | 234 | 1.84E-171 | 0.9574  | 0.9836 | v6.0          | HNU |
| SUM_lingual_surfavg              | ICC2 | 0.911 | 60.82   | 26 | 26  | 2.25E-17  | 0.3561  | 0.9710 | v6.0 vs. v7.1 | HNU |
| SUM_lingual_surfavg              | ICC3 | 0.973 | 356.03  | 26 | 234 | 1.39E-172 | 0.9583  | 0.9839 | v7.1          | HNU |
| SUM_medialorbitofrontal_surfavg  | ICC3 | 0.773 | 34.97   | 26 | 234 | 4.24E-66  | 0.6842  | 0.8555 | v5.3          | HNU |
| SUM_medialorbitofrontal_surfavg  | ICC2 | 0.884 | 22.91   | 26 | 26  | 3.88E-12  | 0.7004  | 0.9472 | v5.3 vs. v6.0 | HNU |
| SUM_medialorbitofrontal_surfavg  | ICC2 | 0.503 | 12.76   | 26 | 26  | 3.56E-09  | -0.0532 | 0.7927 | v5.3 vs. v7.1 | HNU |
| SUM_medialorbitofrontal_surfavg  | ICC3 | 0.822 | 47.19   | 26 | 234 | 2.83E-78  | 0.7474  | 0.8892 | v6.0          | HNU |
| SUM_medialorbitofrontal_surfavg  | ICC2 | 0.671 | 20.87   | 26 | 26  | 1.18E-11  | -0.0317 | 0.8821 | v6.0 vs. v7.1 | HNU |
| SUM_medialorbitofrontal_surfavg  | ICC3 | 0.845 | 55.55   | 26 | 234 | 3.41E-85  | 0.7778  | 0.9044 | v7.1          | HNU |
| SUM_middletemporal_surfavg       | ICC3 | 0.966 | 285.35  | 26 | 234 | 1.11E-161 | 0.9484  | 0.9800 | v5.3          | HNU |
| SUM_middletemporal_surfavg       | ICC2 | 0.867 | 35.92   | 26 | 26  | 1.62E-14  | 0.2825  | 0.9541 | v5.3 vs. v6.0 | HNU |
| SUM_middletemporal_surfavg       | ICC2 | 0.781 | 27.75   | 26 | 26  | 3.82E-13  | 0.0410  | 0.9258 | v5.3 vs. v7.1 | HNU |
| SUM_middletemporal_surfavg       | ICC3 | 0.979 | 470.39  | 26 | 234 | 2.11E-186 | 0.9681  | 0.9878 | v6.0          | HNU |
| SUM_middletemporal_surfavg       | ICC2 | 0.967 | 134.09  | 26 | 26  | 9.60E-22  | 0.7659  | 0.9888 | v6.0 vs. v7.1 | HNU |
| SUM_middletemporal_surfavg       | ICC3 | 0.985 | 638.23  | 26 | 234 | 1.25E-201 | 0.9763  | 0.9910 | v7.1          | HNU |
| SUM_paracentral_surfavg          | ICC3 | 0.963 | 257.69  | 26 | 234 | 1.11E-156 | 0.9432  | 0.9779 | v5.3          | HNU |
| SUM_paracentral_surfavg          | ICC2 | 0.900 | 20.11   | 26 | 26  | 1.83E-11  | 0.8136  | 0.9468 | v5.3 vs. v6.0 | HNU |
| SUM_paracentral_surfavg          | ICC2 | 0.905 | 20.90   | 26 | 26  | 1.16E-11  | 0.8242  | 0.9495 | v5.3 vs. v7.1 | HNU |
| SUM_paracentral_surfavg          | ICC3 | 0.969 | 318.84  | 26 | 234 | 3.87E-167 | 0.9536  | 0.9821 | v6.0          | HNU |
| SUM_paracentral_surfavg          | ICC2 | 0.982 | 106.99  | 26 | 26  | 1.73E-20  | 0.9657  | 0.9906 | v6.0 vs. v7.1 | HNU |
| SUM_paracentral_surfavg          | ICC3 | 0.971 | 336.61  | 26 | 234 | 8.19E-170 | 0.9560  | 0.9830 | v7.1          | HNU |
| SUM parahippocampal_surfavg      | ICC3 | 0.745 | 30.15   | 26 | 234 | 2.35E-60  | 0.6496  | 0.8358 | v5.3          | HNU |
| SUM parahippocampal_surfavg      | ICC2 | 0.553 | 11.00   | 26 | 26  | 1.86E-08  | -0.0502 | 0.8151 | v5.3 vs. v6.0 | HNU |
| SUM parahippocampal_surfavg      | ICC2 | 0.524 | 11.30   | 26 | 26  | 1.37E-08  | -0.0555 | 0.8012 | v5.3 vs. v7.1 | HNU |
| SUM parahippocampal_surfavg      | ICC3 | 0.954 | 209.01  | 26 | 234 | 1.75E-146 | 0.9308  | 0.9729 | v6.0          | HNU |
| SUM parahippocampal_surfavg      | ICC2 | 0.925 | 26.34   | 26 | 26  | 7.21E-13  | 0.8619  | 0.9605 | v6.0 vs. v7.1 | HNU |
| SUM parahippocampal_surfavg      | ICC3 | 0.945 | 173.40  | 26 | 234 | 1.83E-137 | 0.9176  | 0.9675 | v7.1          | HNU |
| SUM_parsopercularis_surfavg      | ICC3 | 0.985 | 679.33  | 26 | 234 | 9.41E-205 | 0.9777  | 0.9915 | v5.3          | HNU |
| SUM_parsopercularis_surfavg      | ICC2 | 0.916 | 28.59   | 26 | 26  | 2.66E-13  | 0.8112  | 0.9591 | v5.3 vs. v6.0 | HNU |
| SUM_parsopercularis_surfavg      | ICC2 | 0.911 | 24.84   | 26 | 26  | 1.46E-12  | 0.8218  | 0.9546 | v5.3 vs. v7.1 | HNU |
| SUM_parsopercularis_surfavg      | ICC3 | 0.993 | 1337.73 | 26 | 234 | 8.01E-239 | 0.9886  | 0.9957 | v6.0          | HNU |
| SUM_parsopercularis_surfavg      | ICC2 | 0.985 | 126.50  | 26 | 26  | 2.02E-21  | 0.9707  | 0.9920 | v6.0 vs. v7.1 | HNU |
| SUM_parsopercularis_surfavg      | ICC3 | 0.992 | 1251.65 | 26 | 234 | 1.81E-235 | 0.9878  | 0.9954 | v7.1          | HNU |
| SUM_parsorbitalis_surfavg        | ICC3 | 0.941 | 160.52  | 26 | 234 | 9.18E-134 | 0.9115  | 0.9649 | v5.3          | HNU |
| SUM_parsorbitalis_surfavg        | ICC2 | 0.770 | 26.72   | 26 | 26  | 6.06E-13  | 0.0287  | 0.9217 | v5.3 vs. v6.0 | HNU |
| SUM_parsorbitalis_surfavg        | ICC2 | 0.638 | 21.26   | 26 | 26  | 9.50E-12  | -0.0388 | 0.8691 | v5.3 vs. v7.1 | HNU |

|                                      |      |       |         |    |     |           |        |        |               |     |
|--------------------------------------|------|-------|---------|----|-----|-----------|--------|--------|---------------|-----|
| SUM_parsorbitalis_surfavg            | ICC3 | 0.970 | 326.84  | 26 | 234 | 2.33E-168 | 0.9547 | 0.9825 | v6.0          | HNU |
| SUM_parsorbitalis_surfavg            | ICC2 | 0.940 | 103.76  | 26 | 26  | 2.55E-20  | 0.4089 | 0.9815 | v6.0 vs. v7.1 | HNU |
| SUM_parsorbitalis_surfavg            | ICC3 | 0.977 | 429.73  | 26 | 234 | 6.61E-182 | 0.9652 | 0.9866 | v7.1          | HNU |
| SUM_parstriangularis_surfavg         | ICC3 | 0.980 | 485.04  | 26 | 234 | 6.29E-188 | 0.9691 | 0.9881 | v5.3          | HNU |
| SUM_parstriangularis_surfavg         | ICC2 | 0.886 | 23.60   | 26 | 26  | 2.71E-12  | 0.6990 | 0.9485 | v5.3 vs. v6.0 | HNU |
| SUM_parstriangularis_surfavg         | ICC2 | 0.841 | 23.66   | 26 | 26  | 2.64E-12  | 0.3631 | 0.9394 | v5.3 vs. v7.1 | HNU |
| SUM_parstriangularis_surfavg         | ICC3 | 0.988 | 806.65  | 26 | 234 | 2.29E-213 | 0.9812 | 0.9928 | v6.0          | HNU |
| SUM_parstriangularis_surfavg         | ICC2 | 0.979 | 211.81  | 26 | 26  | 2.69E-24  | 0.8394 | 0.9929 | v6.0 vs. v7.1 | HNU |
| SUM_parstriangularis_surfavg         | ICC3 | 0.992 | 1169.68 | 26 | 234 | 4.69E-232 | 0.9870 | 0.9951 | v7.1          | HNU |
| SUM_pericalcarine_surfavg            | ICC3 | 0.916 | 109.35  | 26 | 234 | 1.24E-115 | 0.8748 | 0.9493 | v5.3          | HNU |
| SUM_pericalcarine_surfavg            | ICC2 | 0.884 | 41.04   | 26 | 26  | 3.10E-15  | 0.3386 | 0.9603 | v5.3 vs. v6.0 | HNU |
| SUM_pericalcarine_surfavg            | ICC2 | 0.852 | 29.39   | 26 | 26  | 1.90E-13  | 0.2961 | 0.9468 | v5.3 vs. v7.1 | HNU |
| SUM_pericalcarine_surfavg            | ICC3 | 0.959 | 232.73  | 26 | 234 | 1.04E-151 | 0.9374 | 0.9756 | v6.0          | HNU |
| SUM_pericalcarine_surfavg            | ICC2 | 0.977 | 87.00   | 26 | 26  | 2.41E-19  | 0.9554 | 0.9878 | v6.0 vs. v7.1 | HNU |
| SUM_pericalcarine_surfavg            | ICC3 | 0.967 | 297.62  | 26 | 234 | 9.49E-164 | 0.9505 | 0.9808 | v7.1          | HNU |
| SUM_postcentral_surfavg              | ICC3 | 0.970 | 325.87  | 26 | 234 | 3.26E-168 | 0.9546 | 0.9825 | v5.3          | HNU |
| SUM_postcentral_surfavg              | ICC2 | 0.964 | 55.17   | 26 | 26  | 7.69E-17  | 0.9328 | 0.9813 | v5.3 vs. v6.0 | HNU |
| SUM_postcentral_surfavg              | ICC2 | 0.960 | 51.76   | 26 | 26  | 1.71E-16  | 0.9236 | 0.9791 | v5.3 vs. v7.1 | HNU |
| SUM_postcentral_surfavg              | ICC3 | 0.977 | 432.14  | 26 | 234 | 3.49E-182 | 0.9654 | 0.9867 | v6.0          | HNU |
| SUM_postcentral_surfavg              | ICC2 | 0.979 | 171.01  | 26 | 26  | 4.22E-23  | 0.8977 | 0.9921 | v6.0 vs. v7.1 | HNU |
| SUM_postcentral_surfavg              | ICC3 | 0.965 | 280.69  | 26 | 234 | 7.14E-161 | 0.9476 | 0.9797 | v7.1          | HNU |
| SUM_posteriorcingulate_surfavg       | ICC3 | 0.970 | 321.00  | 26 | 234 | 1.80E-167 | 0.9539 | 0.9822 | v5.3          | HNU |
| SUM_posteriorcingulate_surfavg       | ICC2 | 0.975 | 81.36   | 26 | 26  | 5.66E-19  | 0.9516 | 0.9868 | v5.3 vs. v6.0 | HNU |
| SUM_posteriorcingulate_surfavg       | ICC2 | 0.956 | 58.88   | 26 | 26  | 3.39E-17  | 0.8903 | 0.9797 | v5.3 vs. v7.1 | HNU |
| SUM_posteriorcingulate_surfavg       | ICC3 | 0.981 | 523.00  | 26 | 234 | 1.11E-191 | 0.9713 | 0.9890 | v6.0          | HNU |
| SUM_posteriorcingulate_surfavg       | ICC2 | 0.981 | 131.63  | 26 | 26  | 1.22E-21  | 0.9560 | 0.9910 | v6.0 vs. v7.1 | HNU |
| SUM_posteriorcingulate_surfavg       | ICC3 | 0.986 | 683.48  | 26 | 234 | 4.67E-205 | 0.9779 | 0.9916 | v7.1          | HNU |
| SUM_precentral_surfavg               | ICC3 | 0.981 | 515.73  | 26 | 234 | 5.53E-191 | 0.9709 | 0.9888 | v5.3          | HNU |
| SUM_precentral_surfavg               | ICC2 | 0.965 | 77.44   | 26 | 26  | 1.06E-18  | 0.9006 | 0.9843 | v5.3 vs. v6.0 | HNU |
| SUM_precentral_surfavg               | ICC2 | 0.966 | 57.63   | 26 | 26  | 4.44E-17  | 0.9360 | 0.9822 | v5.3 vs. v7.1 | HNU |
| SUM_precentral_surfavg               | ICC3 | 0.976 | 407.17  | 26 | 234 | 3.13E-179 | 0.9634 | 0.9859 | v6.0          | HNU |
| SUM_precentral_surfavg               | ICC2 | 0.988 | 278.95  | 26 | 26  | 7.70E-26  | 0.9488 | 0.9953 | v6.0 vs. v7.1 | HNU |
| SUM_precentral_surfavg               | ICC3 | 0.969 | 316.03  | 26 | 234 | 1.06E-166 | 0.9532 | 0.9819 | v7.1          | HNU |
| SUM_precuneus_surfavg                | ICC3 | 0.985 | 642.13  | 26 | 234 | 6.21E-202 | 0.9765 | 0.9910 | v5.3          | HNU |
| SUM_precuneus_surfavg                | ICC2 | 0.974 | 91.83   | 26 | 26  | 1.21E-19  | 0.9410 | 0.9873 | v5.3 vs. v6.0 | HNU |
| SUM_precuneus_surfavg                | ICC2 | 0.973 | 95.30   | 26 | 26  | 7.56E-20  | 0.9345 | 0.9875 | v5.3 vs. v7.1 | HNU |
| SUM_precuneus_surfavg                | ICC3 | 0.990 | 1016.87 | 26 | 234 | 5.26E-225 | 0.9850 | 0.9943 | v6.0          | HNU |
| SUM_precuneus_surfavg                | ICC2 | 0.996 | 454.07  | 26 | 26  | 1.41E-28  | 0.9918 | 0.9978 | v6.0 vs. v7.1 | HNU |
| SUM_precuneus_surfavg                | ICC3 | 0.991 | 1165.80 | 26 | 234 | 6.90E-232 | 0.9869 | 0.9950 | v7.1          | HNU |
| SUM_rostralanteriorcingulate_surfavg | ICC3 | 0.931 | 135.74  | 26 | 234 | 8.81E-126 | 0.8969 | 0.9588 | v5.3          | HNU |
| SUM_rostralanteriorcingulate_surfavg | ICC2 | 0.897 | 35.74   | 26 | 26  | 1.72E-14  | 0.5493 | 0.9610 | v5.3 vs. v6.0 | HNU |
| SUM_rostralanteriorcingulate_surfavg | ICC2 | 0.913 | 24.76   | 26 | 26  | 1.53E-12  | 0.8294 | 0.9550 | v5.3 vs. v7.1 | HNU |
| SUM_rostralanteriorcingulate_surfavg | ICC3 | 0.943 | 165.10  | 26 | 234 | 4.13E-135 | 0.9138 | 0.9659 | v6.0          | HNU |
| SUM_rostralanteriorcingulate_surfavg | ICC2 | 0.956 | 60.93   | 26 | 26  | 2.20E-17  | 0.8794 | 0.9801 | v6.0 vs. v7.1 | HNU |

|                                      |      |       |         |    |     |           |         |        |               |     |
|--------------------------------------|------|-------|---------|----|-----|-----------|---------|--------|---------------|-----|
| SUM_rostralanteriorcingulate_surfavg | ICC3 | 0.959 | 232.63  | 26 | 234 | 1.09E-151 | 0.9374  | 0.9756 | v7.1          | HNU |
| SUM_rostralmiddlefrontal_surfavg     | ICC3 | 0.985 | 636.90  | 26 | 234 | 1.59E-201 | 0.9763  | 0.9910 | v5.3          | HNU |
| SUM_rostralmiddlefrontal_surfavg     | ICC2 | 0.947 | 50.31   | 26 | 26  | 2.44E-16  | 0.8559  | 0.9759 | v5.3 vs. v6.0 | HNU |
| SUM_rostralmiddlefrontal_surfavg     | ICC2 | 0.939 | 70.87   | 26 | 26  | 3.26E-18  | 0.6140  | 0.9787 | v5.3 vs. v7.1 | HNU |
| SUM_rostralmiddlefrontal_surfavg     | ICC3 | 0.993 | 1478.85 | 26 | 234 | 6.97E-244 | 0.9897  | 0.9961 | v6.0          | HNU |
| SUM_rostralmiddlefrontal_surfavg     | ICC2 | 0.991 | 306.65  | 26 | 26  | 2.27E-26  | 0.9714  | 0.9960 | v6.0 vs. v7.1 | HNU |
| SUM_rostralmiddlefrontal_surfavg     | ICC3 | 0.993 | 1374.24 | 26 | 234 | 3.51E-240 | 0.9889  | 0.9958 | v7.1          | HNU |
| SUM_superiorfrontal_surfavg          | ICC3 | 0.990 | 995.73  | 26 | 234 | 6.00E-224 | 0.9847  | 0.9942 | v5.3          | HNU |
| SUM_superiorfrontal_surfavg          | ICC2 | 0.982 | 198.40  | 26 | 26  | 6.24E-24  | 0.9167  | 0.9933 | v5.3 vs. v6.0 | HNU |
| SUM_superiorfrontal_surfavg          | ICC2 | 0.962 | 147.44  | 26 | 26  | 2.84E-22  | 0.6162  | 0.9881 | v5.3 vs. v7.1 | HNU |
| SUM_superiorfrontal_surfavg          | ICC3 | 0.994 | 1787.44 | 26 | 234 | 1.87E-253 | 0.9914  | 0.9968 | v6.0          | HNU |
| SUM_superiorfrontal_surfavg          | ICC2 | 0.992 | 599.84  | 26 | 26  | 3.84E-30  | 0.9182  | 0.9973 | v6.0 vs. v7.1 | HNU |
| SUM_superiorfrontal_surfavg          | ICC3 | 0.992 | 1299.79 | 26 | 234 | 2.26E-237 | 0.9883  | 0.9955 | v7.1          | HNU |
| SUM_superiorparietal_surfavg         | ICC3 | 0.980 | 501.28  | 26 | 234 | 1.44E-189 | 0.9700  | 0.9885 | v5.3          | HNU |
| SUM_superiorparietal_surfavg         | ICC2 | 0.939 | 35.46   | 26 | 26  | 1.90E-14  | 0.8791  | 0.9685 | v5.3 vs. v6.0 | HNU |
| SUM_superiorparietal_surfavg         | ICC2 | 0.924 | 36.11   | 26 | 26  | 1.51E-14  | 0.7924  | 0.9662 | v5.3 vs. v7.1 | HNU |
| SUM_superiorparietal_surfavg         | ICC3 | 0.989 | 930.38  | 26 | 234 | 1.56E-220 | 0.9837  | 0.9938 | v6.0          | HNU |
| SUM_superiorparietal_surfavg         | ICC2 | 0.993 | 604.53  | 26 | 26  | 3.47E-30  | 0.9425  | 0.9975 | v6.0 vs. v7.1 | HNU |
| SUM_superiorparietal_surfavg         | ICC3 | 0.976 | 403.99  | 26 | 234 | 7.67E-179 | 0.9631  | 0.9858 | v7.1          | HNU |
| SUM_superiortemporal_surfavg         | ICC3 | 0.977 | 425.59  | 26 | 234 | 2.00E-181 | 0.9649  | 0.9865 | v5.3          | HNU |
| SUM_superiortemporal_surfavg         | ICC2 | 0.917 | 81.80   | 26 | 26  | 5.28E-19  | 0.2617  | 0.9746 | v5.3 vs. v6.0 | HNU |
| SUM_superiortemporal_surfavg         | ICC2 | 0.849 | 90.30   | 26 | 26  | 1.50E-19  | 0.0175  | 0.9562 | v5.3 vs. v7.1 | HNU |
| SUM_superiortemporal_surfavg         | ICC3 | 0.975 | 394.42  | 26 | 234 | 1.18E-177 | 0.9622  | 0.9855 | v6.0          | HNU |
| SUM_superiortemporal_surfavg         | ICC2 | 0.969 | 180.76  | 26 | 26  | 2.07E-23  | 0.6523  | 0.9902 | v6.0 vs. v7.1 | HNU |
| SUM_superiortemporal_surfavg         | ICC3 | 0.981 | 507.91  | 26 | 234 | 3.19E-190 | 0.9704  | 0.9887 | v7.1          | HNU |
| SUM_supramarginal_surfavg            | ICC3 | 0.974 | 373.29  | 26 | 234 | 6.32E-175 | 0.9601  | 0.9846 | v5.3          | HNU |
| SUM_supramarginal_surfavg            | ICC2 | 0.914 | 40.80   | 26 | 26  | 3.34E-15  | 0.6338  | 0.9667 | v5.3 vs. v6.0 | HNU |
| SUM_supramarginal_surfavg            | ICC2 | 0.889 | 34.80   | 26 | 26  | 2.40E-14  | 0.4852  | 0.9587 | v5.3 vs. v7.1 | HNU |
| SUM_supramarginal_surfavg            | ICC3 | 0.984 | 635.88  | 26 | 234 | 1.92E-201 | 0.9763  | 0.9909 | v6.0          | HNU |
| SUM_supramarginal_surfavg            | ICC2 | 0.993 | 340.62  | 26 | 26  | 5.83E-27  | 0.9815  | 0.9965 | v6.0 vs. v7.1 | HNU |
| SUM_supramarginal_surfavg            | ICC3 | 0.977 | 429.72  | 26 | 234 | 6.62E-182 | 0.9652  | 0.9866 | v7.1          | HNU |
| SUM_SurfArea                         | ICC3 | 0.991 | 1101.75 | 26 | 234 | 4.84E-229 | 0.9862  | 0.9948 | v5.3          | HNU |
| SUM_SurfArea                         | ICC2 | 0.980 | 918.96  | 26 | 26  | 1.52E-32  | 0.3200  | 0.9947 | v5.3 vs. v6.0 | HNU |
| SUM_SurfArea                         | ICC2 | 0.932 | 381.11  | 26 | 26  | 1.36E-27  | 0.0716  | 0.9822 | v5.3 vs. v7.1 | HNU |
| SUM_SurfArea                         | ICC3 | 0.994 | 1653.78 | 26 | 234 | 1.58E-249 | 0.9907  | 0.9965 | v6.0          | HNU |
| SUM_SurfArea                         | ICC2 | 0.983 | 887.52  | 26 | 26  | 2.39E-32  | 0.4093  | 0.9955 | v6.0 vs. v7.1 | HNU |
| SUM_SurfArea                         | ICC3 | 0.994 | 1578.65 | 26 | 234 | 3.52E-247 | 0.9903  | 0.9963 | v7.1          | HNU |
| SUM_temporalpole_surfavg             | ICC3 | 0.752 | 31.31   | 26 | 234 | 8.35E-62  | 0.6586  | 0.8410 | v5.3          | HNU |
| SUM_temporalpole_surfavg             | ICC2 | 0.714 | 6.04    | 26 | 26  | 9.17E-06  | 0.5166  | 0.8401 | v5.3 vs. v6.0 | HNU |
| SUM_temporalpole_surfavg             | ICC2 | 0.399 | 4.10    | 26 | 26  | 3.03E-04  | -0.0293 | 0.6753 | v5.3 vs. v7.1 | HNU |
| SUM_temporalpole_surfavg             | ICC3 | 0.877 | 72.06   | 26 | 234 | 1.34E-96  | 0.8205  | 0.9248 | v6.0          | HNU |
| SUM_temporalpole_surfavg             | ICC2 | 0.633 | 13.73   | 26 | 26  | 1.55E-09  | -0.0274 | 0.8575 | v6.0 vs. v7.1 | HNU |
| SUM_temporalpole_surfavg             | ICC3 | 0.895 | 86.63   | 26 | 234 | 6.67E-105 | 0.8465  | 0.9367 | v7.1          | HNU |
| SUM_transversetemporal_surfavg       | ICC3 | 0.952 | 199.86  | 26 | 234 | 2.59E-144 | 0.9278  | 0.9717 | v5.3          | HNU |

|                              |      |       |        |    |     |           |        |        |               |     |
|------------------------------|------|-------|--------|----|-----|-----------|--------|--------|---------------|-----|
| SUM_transversetemporal_surfg | ICC2 | 0.924 | 27.03  | 26 | 26  | 5.28E-13  | 0.8556 | 0.9599 | v5.3 vs. v6.0 | HNU |
| SUM_transversetemporal_surfg | ICC2 | 0.910 | 20.39  | 26 | 26  | 1.56E-11  | 0.8324 | 0.9521 | v5.3 vs. v7.1 | HNU |
| SUM_transversetemporal_surfg | ICC3 | 0.969 | 308.81 | 26 | 234 | 1.45E-165 | 0.9522 | 0.9815 | v6.0          | HNU |
| SUM_transversetemporal_surfg | ICC2 | 0.963 | 62.26  | 26 | 26  | 1.68E-17  | 0.9202 | 0.9815 | v6.0 vs. v7.1 | HNU |
| SUM_transversetemporal_surfg | ICC3 | 0.974 | 378.49 | 26 | 234 | 1.30E-175 | 0.9607 | 0.9849 | v7.1          | HNU |
